# Supplementary material for: Translation-dependent and -independent mRNA decay occur through mutually exclusive pathways defined by ribosome density during T cell activation
Source: HighWire-hosted journal article supplement (doi:10.1101/gr.277863.123), 2024-03-20
Supplement: Supplemental_Table_S1.xlsx [file Supplemental_Table_S1.xlsx]

## Sheet: Diff_expr_RNAseq
	baseMean	log2FoldChange	lfcSE	stat	pvalue	padj
ENSMUSG00000000001.4	588.668598981144	-0.689839013108023	0.222555277008495	-3.09962999925494	0.00193762526429219	0.0151747320663195
ENSMUSG00000000003.14	0	NA	NA	NA	NA	NA
ENSMUSG00000000028.13	9.13588513636365	-0.61204371469287	0.859569775413938	-0.712034941431173	0.476443139179943	NA
ENSMUSG00000000037.15	0.498486363142966	0.754534057644096	2.95384030603616	0.255441723136558	0.798381948947964	NA
ENSMUSG00000000049.10	0	NA	NA	NA	NA	NA
ENSMUSG00000000056.7	45.6547385794222	-1.33467842279685	0.449497271940088	-2.96926923946882	0.00298508922354491	0.0217505032871379
ENSMUSG00000000058.6	0.427873529664844	-1.97675127057475	3.40381035860548	-0.580746593469036	0.56141125414819	NA
ENSMUSG00000000078.6	1044.18692336913	-1.78795683814375	0.280765903528644	-6.36814091623252	1.91333094296582e-10	1.02889371457987e-08
ENSMUSG00000000085.15	16.3160283679988	0.29997073816404	0.626371805141008	0.478902044603542	0.632008316354623	0.809759469139187
ENSMUSG00000000088.6	42.8654125071195	0.0605120931195465	0.431007364305949	0.140396889080977	0.888346415663591	0.949888765374125
ENSMUSG00000000093.6	1.16172296521571	3.04670824636432	2.35501079922155	1.29371306805532	0.195764549739798	NA
ENSMUSG00000000094.11	0	NA	NA	NA	NA	NA
ENSMUSG00000000103.11	0	NA	NA	NA	NA	NA
ENSMUSG00000000120.6	0.2614317177576	1.43789971781197	4.01347221223144	0.358268262934481	0.720142566386536	NA
ENSMUSG00000000125.5	1.12802740883436	3.01942373499428	2.29888133183651	1.31343175186087	0.189037504089135	NA
ENSMUSG00000000126.10	0	NA	NA	NA	NA	NA
ENSMUSG00000000127.13	0.427873529664844	-1.97675127057475	3.40381035860548	-0.580746593469036	0.56141125414819	NA
ENSMUSG00000000131.14	466.427105099163	0.478154807410948	0.229070503539369	2.08736960901983	0.0368547369410217	0.141991904594421
ENSMUSG00000000134.16	51.2148033548475	0.700675174820865	0.412798266722142	1.69737915903725	0.0896250001411395	0.258769631279988
ENSMUSG00000000142.14	61.5526217470109	-0.925010713530222	0.37346738928452	-2.47681789647641	0.0132559517000045	0.0681734658857375
ENSMUSG00000000148.16	67.2399807951775	0.277882181928286	0.350301881884453	0.793264884657243	0.427623511234926	0.664764395593478
ENSMUSG00000000149.9	88.688460619288	-0.13849569898617	0.320168202930585	-0.432571684878391	0.665325963678191	0.829512330312585
ENSMUSG00000000154.14	0	NA	NA	NA	NA	NA
ENSMUSG00000000157.14	0	NA	NA	NA	NA	NA
ENSMUSG00000000159.14	0.0879206042845622	-0.000364418712234587	4.04679653155627	-9.00511575990808e-05	0.999928149571766	NA
ENSMUSG00000000167.13	0.125330668225887	2.27160461047965	4.03614422430032	0.562815520021077	0.573560510917365	NA
ENSMUSG00000000168.8	49.710094343516	-0.195739982340143	0.399598628225583	-0.489841477207581	0.624246077841	0.80585345142445
ENSMUSG00000000171.4	89.4498841848219	-0.654806845023723	0.337990573416378	-1.93735238946162	0.0527022822747088	0.181717176032671
ENSMUSG00000000182.9	0.864291293381355	3.30381003240519	3.04243939906114	1.08590824633178	0.277519588180314	NA
ENSMUSG00000000183.6	0	NA	NA	NA	NA	NA
ENSMUSG00000000184.11	357.665645132556	2.20552722031146	0.317389268227109	6.94896595789524	3.67973320162187e-12	2.57401824932964e-10
ENSMUSG00000000194.12	118.886452314427	0.720293314512318	0.30536165783513	2.35882042172176	0.0183331250253089	0.0864792805470161
ENSMUSG00000000197.7	0	NA	NA	NA	NA	NA
ENSMUSG00000000202.8	0	NA	NA	NA	NA	NA
ENSMUSG00000000204.14	1.53432105066693	0.445215229611713	1.76544798179465	0.252182581533291	0.800899940996509	NA
ENSMUSG00000000214.9	0	NA	NA	NA	NA	NA
ENSMUSG00000000215.9	0	NA	NA	NA	NA	NA
ENSMUSG00000000216.8	0	NA	NA	NA	NA	NA
ENSMUSG00000000223.12	0.241261939789893	1.48793620930592	4.01349251054985	0.370733520841198	0.710836020694759	NA
ENSMUSG00000000244.15	61.5757891718364	-0.165138274268807	0.372045981770686	-0.443865227311047	0.657140026185455	0.823972975507226
ENSMUSG00000000247.10	0	NA	NA	NA	NA	NA
ENSMUSG00000000248.15	6.87199968451297	-0.262388713338741	0.930982158851978	-0.281840753707139	0.778065620158856	NA
ENSMUSG00000000253.11	0	NA	NA	NA	NA	NA
ENSMUSG00000000263.14	0	NA	NA	NA	NA	NA
ENSMUSG00000000266.10	1.03494306190464	-1.90651514397466	2.23687786273371	-0.852310792527893	0.394041617483098	NA
ENSMUSG00000000275.15	143.689243783498	-0.314157326092261	0.30082799706868	-1.04430880487675	0.296342540500212	0.543884645576754
ENSMUSG00000000276.10	95.3127631433789	-1.24055653304602	0.338261206635712	-3.66745139173476	0.000244980102536136	0.00269712257813846
ENSMUSG00000000278.10	20.9593034829901	-0.0889977501765779	0.564184589584475	-0.157745801320318	0.874657108057774	0.944110540771203
ENSMUSG00000000282.11	86.146878789387	0.90163593668231	0.391428811348468	2.30344806141424	0.0212536462555439	0.0964994049512928
ENSMUSG00000000290.12	302.185446771269	0.0291022612726506	0.248332134741162	0.11719087947673	0.906708794240989	0.96004460566693
ENSMUSG00000000295.11	9.23810741027353	-2.07112825159702	0.894514763129807	-2.31536508615059	0.0205929605561664	NA
ENSMUSG00000000296.7	0	NA	NA	NA	NA	NA
ENSMUSG00000000301.15	2.50069800703831	1.18053572080391	1.55564157189983	0.758873857660015	0.44792801861783	NA
ENSMUSG00000000303.11	2.23206658429911	-0.272589212789333	1.49130022497485	-0.182786274838743	0.854965718269109	NA
ENSMUSG00000000305.11	0.144048548896892	2.04666396042304	4.05459644924663	0.504776242479896	0.613716004026025	NA
ENSMUSG00000000308.13	0	NA	NA	NA	NA	NA
ENSMUSG00000000317.10	0.231969153181455	1.11144759640798	4.0201330676362	0.276470350037816	0.782186829728365	NA
ENSMUSG00000000318.15	0	NA	NA	NA	NA	NA
ENSMUSG00000000320.9	0.357299821407342	2.25238858870987	3.64849111706288	0.617347971104037	0.537005231873927	NA
ENSMUSG00000000325.14	8.11577273858035	-0.328640729752628	0.876761059547776	-0.374834997715498	0.707783184330572	NA
ENSMUSG00000000326.11	24.605025950658	0.785405214119451	0.515411359954882	1.52384148884147	0.127548312669034	0.323084643393872
ENSMUSG00000000339.13	25.0928347428453	-0.543289883063697	0.537813281041198	-1.01018309181933	0.31240757846057	0.561300719934137
ENSMUSG00000000340.9	28.9494033777144	0.798091963901362	0.493462031090181	1.61733206126959	0.105806622166712	0.288150996048934
ENSMUSG00000000346.8	427.422059415938	-0.996632047991738	0.273671871217271	-3.64170436500762	0.000270838996349334	0.00290923685966251
ENSMUSG00000000355.12	22.0405048307112	0.0854783706239553	0.542210858785132	0.15764783983758	0.874734304152669	0.944110540771203
ENSMUSG00000000359.3	0	NA	NA	NA	NA	NA
ENSMUSG00000000365.8	0	NA	NA	NA	NA	NA
ENSMUSG00000000374.7	308.514090414386	-0.143897807049735	0.236821160222164	-0.60762225349603	0.543438038003051	0.751496412008215
ENSMUSG00000000378.14	273.049875174284	-0.560554485518295	0.248836215262139	-2.25270459497936	0.0242777810375661	0.105549882041868
ENSMUSG00000000381.10	0	NA	NA	NA	NA	NA
ENSMUSG00000000384.14	95.3177730703347	1.52569675225616	0.373028244818807	4.09003010749828	4.31317196802381e-05	0.000638735483870514
ENSMUSG00000000385.7	0	NA	NA	NA	NA	NA
ENSMUSG00000000386.13	2.67867142245489	0.416863461994445	1.38707201930858	0.300534836109116	0.763769228417978	NA
ENSMUSG00000000392.16	0.303927273902837	1.70569028714108	4.01049462764315	0.425306712888796	0.670613100607357	NA
ENSMUSG00000000394.14	0.0879206042845622	-0.000364418712234587	4.04679653155627	-9.00511575990808e-05	0.999928149571766	NA
ENSMUSG00000000399.9	71.7891246078329	-0.340737278430098	0.347584837787688	-0.98029960282165	0.3269382507269	0.577850597628234
ENSMUSG00000000402.2	0.198766383644657	1.1656308671802	4.02277772299595	0.289757711572515	0.77200160182017	NA
ENSMUSG00000000409.13	605.505324248981	0.754124292843605	0.237643515253576	3.17334260957604	0.00150694581618439	0.0122549733482518
ENSMUSG00000000411.7	0	NA	NA	NA	NA	NA
ENSMUSG00000000416.15	0.144048548896892	2.04666396042304	4.05459644924663	0.504776242479896	0.613716004026025	NA
ENSMUSG00000000420.14	183.605946340794	-0.280486431244532	0.27396211446109	-1.02381466793785	0.305922820935458	0.5544112724257
ENSMUSG00000000435.1	0	NA	NA	NA	NA	NA
ENSMUSG00000000439.9	70.4030041300515	-0.72369498357285	0.356359228813869	-2.03080185682758	0.0422750986105412	0.156445139116171
ENSMUSG00000000440.11	0	NA	NA	NA	NA	NA
ENSMUSG00000000441.16	304.281110016329	-0.143393828037571	0.238726958044184	-0.600660391320495	0.54806620544445	0.75470291961266
ENSMUSG00000000486.12	180.791385767349	-0.658173263132237	0.274976544500806	-2.39356147385985	0.0166856849478664	0.0807444506701027
ENSMUSG00000000489.6	39.9288780840329	5.30080720346866	0.641521881181983	8.26286266916118	1.42219829482891e-16	1.79290565980603e-14
ENSMUSG00000000530.15	4.00128628014158	-0.346524874964054	1.16037040903941	-0.298632981558808	0.765220097494756	NA
ENSMUSG00000000531.4	16.9613518921795	3.93384299451849	0.748040253510418	5.25886538332353	1.44946945501787e-07	4.27097095581292e-06
ENSMUSG00000000532.10	62.4042723340121	-0.480159527961585	0.387959416709932	-1.23765401039509	0.21584437856686	0.447607865314356
ENSMUSG00000000538.17	49.6262654080909	0.233297749926648	0.40483729795658	0.576275336052829	0.564429090983973	0.765351192395943
ENSMUSG00000000544.13	0	NA	NA	NA	NA	NA
ENSMUSG00000000552.9	0.375911092024904	0.898712441964233	3.9368299564326	0.228283276623563	0.819426024665863	NA
ENSMUSG00000000555.6	15.9788661444963	0.368062599945151	0.628404586763052	0.585709601263515	0.558070680876495	0.761843976252527
ENSMUSG00000000560.8	1.25176044448948	0.218083138181144	1.92310827166644	0.113401383268019	0.909712343097815	NA
ENSMUSG00000000561.13	111.169523663437	1.42057509325662	0.308714244312789	4.6015858335882	4.1928630394033e-06	8.58937942643476e-05
ENSMUSG00000000562.5	1.13304807841696	-0.240375014774419	2.15743726679485	-0.111416919728808	0.911285743591937	NA
ENSMUSG00000000563.16	237.533455935255	-0.101195889619142	0.261316688869445	-0.3872538338709	0.698568299475339	0.849871727213639
ENSMUSG00000000567.5	0.0626653341129435	1.93703867970293	4.04540729808436	0.47882414228604	0.632063740172013	NA
ENSMUSG00000000568.14	115.410974168981	0.677859171622502	0.302298224944149	2.24235247080177	0.0249386010433289	0.10782966110016
ENSMUSG00000000579.13	15.8883987002357	-0.548374579366139	0.659677975648902	-0.831276167476598	0.405817634839	0.647442041564019
ENSMUSG00000000581.7	65.4323522014936	-0.677664307393885	0.366409493542825	-1.84947256917807	0.0643896051589713	0.207105855247772
ENSMUSG00000000594.7	67.9787105176426	-0.216026597433585	0.35407611442354	-0.610113443504348	0.54178666185824	0.74994456270541
ENSMUSG00000000600.14	138.595428845215	0.123720196835175	0.285311262902634	0.433632361991246	0.664555430513583	0.829272650346464
ENSMUSG00000000605.8	174.98111915233	0.470380386163883	0.282599323073132	1.66447810648915	0.096016922697858	0.271396058768847
ENSMUSG00000000606.14	0.288097097793785	2.56009459768791	4.02323148779407	0.636327938239418	0.524562698846668	NA
ENSMUSG00000000617.13	0.537348324380993	1.00848835858494	3.11820908427345	0.323419094528077	0.746377870588838	NA
ENSMUSG00000000627.14	8.21839272815254	-0.74924366764561	0.947199427416349	-0.791009417825877	0.428938495772809	NA
ENSMUSG00000000628.9	20.1024810312117	2.28026472695443	0.731451460866501	3.11745187336581	0.0018242172820967	0.0143996013717064
ENSMUSG00000000631.18	35.6480059373586	-0.411375055429633	0.450249296300404	-0.913660629366461	0.36089519759761	0.609557442435396
ENSMUSG00000000632.12	0.144048548896892	2.04666396042304	4.05459644924663	0.504776242479896	0.613716004026025	NA
ENSMUSG00000000673.8	0.150585938397506	1.06692664555661	4.0430678696176	0.26389036245823	0.791864402142933	NA
ENSMUSG00000000682.7	147.660900670809	-0.447133088632918	0.356236797339199	-1.2551569404751	0.209421793415547	0.440123378248013
ENSMUSG00000000686.11	13.8361434406955	-2.62140062386715	0.761418976010044	-3.44278341683012	0.000575760216546529	0.00553501776890093
ENSMUSG00000000690.5	0.115931271564006	0.29763893709183	4.04178928838603	0.0736403894055258	0.941296532270958	NA
ENSMUSG00000000693.9	0.0626653341129435	1.93703867970293	4.04540729808436	0.47882414228604	0.632063740172013	NA
ENSMUSG00000000701.7	0	NA	NA	NA	NA	NA
ENSMUSG00000000706.14	0.2614317177576	1.43789971781197	4.01347221223144	0.358268262934481	0.720142566386536	NA
ENSMUSG00000000708.13	125.360630603681	-0.261823965610697	0.29102455887087	-0.899662786627126	0.368299732933636	0.614738371929847
ENSMUSG00000000711.2	169.49506912802	-0.681944122545172	0.296205523173251	-2.30226673439273	0.0213201345879752	0.0966482813461213
ENSMUSG00000000724.10	0	NA	NA	NA	NA	NA
ENSMUSG00000000730.12	0	NA	NA	NA	NA	NA
ENSMUSG00000000731.14	0.0879206042845622	-0.000364418712234587	4.04679653155627	-9.00511575990808e-05	0.999928149571766	NA
ENSMUSG00000000732.8	16.7229273245801	-2.28993000104013	0.690285919388421	-3.31736449595983	0.000908709822479439	0.00805204872565715
ENSMUSG00000000738.16	97.960810354032	0.227698203874584	0.307558199167933	0.740341842586535	0.45909259781163	0.689119454216899
ENSMUSG00000000739.12	0	NA	NA	NA	NA	NA
ENSMUSG00000000740.10	1876.76910630827	-0.512263307192583	0.225948860037941	-2.26716482263537	0.0233801588738499	0.103001990246085
ENSMUSG00000000743.8	196.738925133648	-0.177934127411502	0.262299514898543	-0.678362396058287	0.497541945579776	0.716080337302742
ENSMUSG00000000751.12	344.070880062498	-1.77046327472573	0.255427621081509	-6.93136970555256	4.16785226258847e-12	2.89195168284767e-10
ENSMUSG00000000753.14	0.144048548896892	2.04666396042304	4.05459644924663	0.504776242479896	0.613716004026025	NA
ENSMUSG00000000759.13	175.554020132831	0.408832555508209	0.272296524925764	1.50142406561989	0.133245913256814	0.330769716578659
ENSMUSG00000000766.17	0	NA	NA	NA	NA	NA
ENSMUSG00000000776.11	69.9087596627288	1.49926409737336	0.348059262246254	4.30749662484954	1.65112614500088e-05	0.000282431199832756
ENSMUSG00000000782.14	778.186133728965	-0.970920218366263	0.228182329916551	-4.255019302859	2.09030981415563e-05	0.000343225680171661
ENSMUSG00000000787.11	837.156606808269	0.776736097966892	0.237421884280958	3.27154381879863	0.00106962011569381	0.00923070358618811
ENSMUSG00000000791.8	3.91408320659007	0.721318330812113	1.21791908395735	0.592254723908548	0.553680029358637	NA
ENSMUSG00000000792.2	0.263761812853687	-0.810759894888838	3.9971455742918	-0.202834717880518	0.83926422099214	NA
ENSMUSG00000000794.9	0.0626653341129435	1.93703867970293	4.04540729808436	0.47882414228604	0.632063740172013	NA
ENSMUSG00000000804.13	130.138973390014	0.0467101374578752	0.298642946143336	0.156407971663447	0.875711454029135	0.944661653769644
ENSMUSG00000000805.17	0	NA	NA	NA	NA	NA
ENSMUSG00000000811.12	18.6370483588891	0.903052644707621	0.593262036004644	1.52218175089928	0.127963546414776	0.323268592154319
ENSMUSG00000000817.10	60.8258592709101	-0.292032369827073	0.375442936372819	-0.777834236671008	0.436666741610817	0.672107449878259
ENSMUSG00000000823.15	98.8834370125131	-0.146518006021838	0.331759190374363	-0.4416396298065	0.658750001821299	0.825110208300315
ENSMUSG00000000826.15	515.806770956595	0.324533303306475	0.245065124589207	1.32427371642733	0.185412156341363	0.408177550098012
ENSMUSG00000000827.17	72.9449092023017	-0.160689476551619	0.345587744033924	-0.464974465459761	0.64194974256497	0.815734099103383
ENSMUSG00000000838.16	144.673281323118	-0.428797649098059	0.280448317457913	-1.5289720864965	0.126271363949032	0.321146560868303
ENSMUSG00000000861.14	0.405480266654493	2.31415383640431	3.49152014181635	0.662792635416516	0.507463370965447	NA
ENSMUSG00000000869.11	3.2563309431591	2.00993206934862	1.34765333937057	1.49143107550742	0.135848354450774	NA
ENSMUSG00000000876.10	9.67915561867344	-0.506173033114988	0.798719058381919	-0.633731006920527	0.526256385746352	0.740475905087457
ENSMUSG00000000881.11	4.76939230192438	-1.32087792234317	1.12293790350358	-1.17626978145631	0.239487087208154	NA
ENSMUSG00000000884.15	9.09786238498626	-0.2104124763453	0.826735837660251	-0.254509925372038	0.799101637159246	NA
ENSMUSG00000000889.8	0	NA	NA	NA	NA	NA
ENSMUSG00000000901.14	4.9178200883792	-0.577006980992416	1.09704240876454	-0.525965975775014	0.598911847261689	NA
ENSMUSG00000000902.12	53.0265664297114	0.438954292416044	0.38450347743249	1.14161332258201	0.253614783806153	0.495256831563354
ENSMUSG00000000903.3	0	NA	NA	NA	NA	NA
ENSMUSG00000000915.14	118.669325713464	-1.05429164320515	0.310385391826878	-3.39671798662867	0.000681992132768464	0.00636427365546622
ENSMUSG00000000916.14	47.4904100356898	1.63991456038212	0.397551684901342	4.12503486380416	3.7067860203355e-05	0.000562490069117577
ENSMUSG00000000934.8	11.3773855658828	1.45044299715907	0.744531526865433	1.94812837982242	0.0513996037951687	0.1784673894486
ENSMUSG00000000938.11	0	NA	NA	NA	NA	NA
ENSMUSG00000000942.10	0.231969153181455	1.11144759640798	4.0201330676362	0.276470350037816	0.782186829728365	NA
ENSMUSG00000000957.9	1.53492044756493	0.741965479453136	1.84882374852034	0.401317583705288	0.68818631927383	NA
ENSMUSG00000000958.8	1.21212689550551	0.675106660079831	1.95376995439439	0.345540506732325	0.729688063356197	NA
ENSMUSG00000000959.6	34.2899883575552	-0.139846450834591	0.469261730334272	-0.298013756065242	0.765692664576981	0.887565803616228
ENSMUSG00000000976.12	102.772578030252	0.896139193733747	0.311951610425691	2.87268654427163	0.00406997715745323	0.0277700899783724
ENSMUSG00000000982.5	1.20935922881693	4.21279622227945	2.48000710027307	1.69870329073477	0.0893751031030951	NA
ENSMUSG00000000983.12	0	NA	NA	NA	NA	NA
ENSMUSG00000001014.5	1.86118692746523	2.48159655063562	1.86885590127547	1.32786939268136	0.18422125761403	NA
ENSMUSG00000001016.11	114.762499250233	-0.235887555918229	0.302198305582821	-0.780572066621271	0.435054226135802	0.670825548686817
ENSMUSG00000001017.14	290.721429199266	0.186098831407521	0.262562548582103	0.708779041079916	0.478461606003478	0.702769290291774
ENSMUSG00000001018.14	43.9307784707455	-0.743635324680293	0.419405344784933	-1.77307069146108	0.0762169937898979	0.232295789786851
ENSMUSG00000001020.8	5.72413561098281	-2.68996929344706	1.13201835026336	-2.37625944210289	0.017489161006289	NA
ENSMUSG00000001021.11	0.115931271564006	0.29763893709183	4.04178928838603	0.0736403894055258	0.941296532270958	NA
ENSMUSG00000001023.9	0	NA	NA	NA	NA	NA
ENSMUSG00000001025.7	8.91351352345034	-0.918323243401916	0.843461433461679	-1.08875546287042	0.276261736447544	NA
ENSMUSG00000001027.7	0.342814932541549	2.13816357269572	3.74763282236582	0.570537102763961	0.568313464655884	NA
ENSMUSG00000001029.14	49.245568151426	-0.0576668209615809	0.395173160022394	-0.145927979922303	0.883978243238121	0.948556097348795
ENSMUSG00000001034.16	40.3081888467507	0.602579809853407	0.422877407614207	1.42495153205995	0.154171211970964	0.363421673369362
ENSMUSG00000001036.16	2.23663359225777	-0.00569570748274747	1.58939212107153	-0.00358357601452532	0.997140726145355	NA
ENSMUSG00000001039.11	0.0626653341129435	1.93703867970293	4.04540729808436	0.47882414228604	0.632063740172013	NA
ENSMUSG00000001052.14	171.475475568119	0.837098895079473	0.298260504369827	2.80660323044822	0.00500668675699901	0.032402603318393
ENSMUSG00000001053.14	18.151187397383	-0.388711465112169	0.61317197419195	-0.633935472384269	0.526122934603697	0.740475905087457
ENSMUSG00000001054.8	75.6459298994624	-0.884913454140688	0.348267321450996	-2.54090292035971	0.0110566614782132	0.0593459234925431
ENSMUSG00000001056.3	80.1309713106745	1.63022689100212	0.340907476058988	4.78202153220025	1.73541084595495e-06	4.00307638568267e-05
ENSMUSG00000001062.16	29.3696073810832	-0.334719757227226	0.508665683584717	-0.658034870503466	0.510515724534042	0.727975268839976
ENSMUSG00000001065.13	113.445301550464	-0.0263019228382464	0.297761222218167	-0.0883322638263997	0.92961259634615	0.971456773090008
ENSMUSG00000001076.6	0	NA	NA	NA	NA	NA
ENSMUSG00000001082.11	20.6782664166319	-0.675892638484718	0.578467753812071	-1.16841886869341	0.242637847547107	0.482254492010192
ENSMUSG00000001089.13	35.6275082562495	-0.522515102978486	0.487969162203262	-1.07079533595779	0.284261464517227	0.530999921994402
ENSMUSG00000001095.5	0	NA	NA	NA	NA	NA
ENSMUSG00000001098.14	78.8082086255881	-1.00188804828137	0.345087428665193	-2.90328758760266	0.00369267371109109	0.0256223908146998
ENSMUSG00000001100.9	44.5899591277641	-0.263958679887957	0.413247961200585	-0.638741638606258	0.522991020291079	0.73805711071777
ENSMUSG00000001103.7	0	NA	NA	NA	NA	NA
ENSMUSG00000001105.14	23.1520725480787	-0.109329189081877	0.542022484955777	-0.201706003194309	0.840146569194681	0.927131388343696
ENSMUSG00000001119.7	0	NA	NA	NA	NA	NA
ENSMUSG00000001120.14	7.27401588489668	0.609699314522524	0.89791414020184	0.679017388439246	0.497126844417005	NA
ENSMUSG00000001123.14	53.6310294123617	-1.15494169127493	0.407713379676958	-2.83272943406963	0.00461524322986176	0.0304988884406533
ENSMUSG00000001127.11	65.9108809010737	0.79610049952084	0.355391387754085	2.24006694296066	0.0250865772251521	0.108047062992598
ENSMUSG00000001128.7	2.69551210381746	0.272426872814897	1.3858948064984	0.196571104486069	0.844163184675839	NA
ENSMUSG00000001131.10	0.115931271564006	0.29763893709183	4.04178928838603	0.0736403894055258	0.941296532270958	NA
ENSMUSG00000001134.8	26.3970663992132	0.936897630003961	0.554385661139498	1.68997449912077	0.0910328334130399	0.261343509738337
ENSMUSG00000001138.12	60.5513036182604	-0.256798130335818	0.367127659778139	-0.699479114406704	0.484252660894232	0.705948813001351
ENSMUSG00000001143.12	11.9535289952234	1.05326761561381	0.720194902139171	1.46247579993321	0.143610871194426	0.34816228113746
ENSMUSG00000001150.6	164.427917150949	0.199764188398836	0.28834688589961	0.69279121144518	0.488440588348752	0.709598203967649
ENSMUSG00000001151.9	269.253563286846	-0.355832284899694	0.27314865976351	-1.30270558606354	0.192675294227722	0.417786852705475
ENSMUSG00000001155.12	0	NA	NA	NA	NA	NA
ENSMUSG00000001156.8	134.742582671113	0.38585777251275	0.321044142525348	1.20188385770746	0.229408529440797	0.465526176252032
ENSMUSG00000001157.12	36.4065149018883	-0.853667573946752	0.451719051740673	-1.88981972457702	0.0587820746169144	0.195199139329962
ENSMUSG00000001158.12	16.7747838071079	0.197660692573945	0.624973519377826	0.316270508182043	0.751797194189616	0.878700079336708
ENSMUSG00000001166.16	10.5702617105339	-0.419536118163911	0.847400447071018	-0.495086024103491	0.620539398732751	0.80347945623726
ENSMUSG00000001168.15	0	NA	NA	NA	NA	NA
ENSMUSG00000001173.14	16.6266100146612	0.196817419805998	0.615573180523899	0.319730335942335	0.749172761190493	0.877847442610665
ENSMUSG00000001175.12	771.608934795577	-0.484037484570738	0.215870270447321	-2.24226098187457	0.0249445099266845	0.10782966110016
ENSMUSG00000001211.13	103.967411454642	0.789744135487758	0.337674969945977	2.33877013630624	0.0193473330753556	0.0898836143522461
ENSMUSG00000001225.11	0	NA	NA	NA	NA	NA
ENSMUSG00000001227.10	0.175841208569124	-0.546698891910202	4.01481580275988	-0.136170354698312	0.891686610366605	NA
ENSMUSG00000001228.13	16.6624676538486	-0.568714058073613	0.625719817076125	-0.908895711072585	0.363405177949036	0.611014368668852
ENSMUSG00000001229.7	54.7074778204687	0.556166961827268	0.383646370140129	1.44968649546749	0.147145963320699	0.354435573463407
ENSMUSG00000001240.12	0	NA	NA	NA	NA	NA
ENSMUSG00000001247.15	0.442358418530636	-0.185008263054891	3.3647021292557	-0.0549850346175566	0.956150386400279	NA
ENSMUSG00000001248.13	657.710485093252	0.0888774087057683	0.214635368046672	0.414085569934783	0.678811440338685	0.837703658762323
ENSMUSG00000001249.13	1.18274524358212	2.05242468603596	2.1022222837873	0.976311925653445	0.328909911920244	NA
ENSMUSG00000001260.9	0	NA	NA	NA	NA	NA
ENSMUSG00000001270.8	18.96171213823	-0.350722912447027	0.623681022013016	-0.56234340964075	0.573882067533701	0.772357470524005
ENSMUSG00000001280.11	480.384466699984	0.296871134270676	0.222744140297332	1.33278987215734	0.182600770261855	0.404296713158261
ENSMUSG00000001281.8	268.138517873314	-0.854343716877806	0.261125104165171	-3.27177932435559	0.00106872958841187	0.00923070358618811
ENSMUSG00000001285.11	29.9350352583169	0.607969636417688	0.47214477698807	1.28767629347947	0.197858669154046	0.423792877620465
ENSMUSG00000001288.13	24.87938707025	-0.0398947722247756	0.513007709185568	-0.0777664185361093	0.938013859649351	0.974836483684384
ENSMUSG00000001289.11	325.061474626577	-0.786466869669153	0.251679917462635	-3.12486938806277	0.00177884024530932	0.0141321712563632
ENSMUSG00000001300.14	2.75860273994214	0.641810897274002	1.36616376813663	0.469790600690132	0.63850463039931	NA
ENSMUSG00000001305.5	44.6383513585683	1.04523633466723	0.414760300741389	2.52009734971949	0.0117322381694715	0.0621577445875203
ENSMUSG00000001313.11	0.532181919524325	0.61720045048827	3.18195653208641	0.193968850380106	0.846200272451925	NA
ENSMUSG00000001323.16	3.63073758484675	0.12248968979627	1.2192482435519	0.100463289936293	0.919976525738197	NA
ENSMUSG00000001333.9	0	NA	NA	NA	NA	NA
ENSMUSG00000001334.9	1.92251924391566	0.784200573928058	1.62540666402588	0.482464229588993	0.629476203136433	NA
ENSMUSG00000001348.13	25.0704782932881	-0.918349192519456	0.528702663439158	-1.73698612854659	0.0823896193542865	0.244104781310014
ENSMUSG00000001349.4	0	NA	NA	NA	NA	NA
ENSMUSG00000001366.13	51.3153782652546	-1.24362184523551	0.410824735856348	-3.02713477717751	0.00246883853517348	0.0185356777981087
ENSMUSG00000001376.16	69.4176189246203	-0.133973092111459	0.360242534724578	-0.371896928312164	0.709969592225974	0.857557108014483
ENSMUSG00000001380.6	95.5646259886119	-0.250868611340427	0.326600786820017	-0.768120045830371	0.442415868649706	0.675507119426266
ENSMUSG00000001383.8	55.0552939145578	-0.223001478387749	0.404937399337607	-0.550706056670816	0.581835192041297	0.778056691213659
ENSMUSG00000001403.12	3.29911884610142	0.505585956488435	1.38576896578515	0.36484144830158	0.715229763282905	NA
ENSMUSG00000001415.9	303.049554711606	0.601326394675751	0.237406551839316	2.53289721794513	0.0113124117715237	0.0603796469492495
ENSMUSG00000001416.12	475.594745056645	0.518684847513259	0.221677459641014	2.33981771693533	0.0192931537472189	0.0897133834648025
ENSMUSG00000001418.12	35.5245182958489	0.493807522381455	0.453266319795921	1.08944234507384	0.275958866574297	0.520463331251542
ENSMUSG00000001419.16	107.967705600771	0.310194355271059	0.386172627552413	0.803253087193389	0.421828467144165	0.660013117168284
ENSMUSG00000001420.12	0.266517209961512	0.232169084205471	4.01818798402947	0.057779547678765	0.953924229545482	NA
ENSMUSG00000001424.13	194.80443688134	0.429824323079294	0.268619262157881	1.60012472533211	0.109570916883965	0.295254672367565
ENSMUSG00000001435.13	0.637449419835947	1.69327809516031	2.69771151341546	0.627672042299481	0.530218803768167	NA
ENSMUSG00000001436.14	62.4995646906269	3.79797493853857	0.436684610833641	8.69729512860127	3.39888623977896e-18	5.04207193225141e-16
ENSMUSG00000001440.5	550.763754406374	0.411020275549071	0.242850324786857	1.69248394421466	0.0905537388838436	0.26051362898345
ENSMUSG00000001441.12	108.177580117386	0.236372136952999	0.306129933378997	0.772130102874861	0.440037374620851	0.674110766491962
ENSMUSG00000001444.2	45.1565129366679	3.63683883519435	0.496991690638089	7.31770551440207	2.52246652715721e-13	2.08685596150583e-11
ENSMUSG00000001445.9	61.5529695461802	0.174387642191243	0.392168297045192	0.444675521976593	0.656554261288907	0.823972975507226
ENSMUSG00000001467.5	150.939363346606	0.743400969346158	0.281359381233307	2.64217587516557	0.00823752680338604	0.0473135384621719
ENSMUSG00000001472.15	610.95891173991	0.0377009511394208	0.217176623585217	0.17359580656998	0.862183127855537	0.938777984316507
ENSMUSG00000001473.6	0.86136446359878	-0.0819092360106456	2.23694345738374	-0.0366165875763549	0.970790717426151	NA
ENSMUSG00000001482.13	10.5438092878205	-0.578569362697079	0.763979374161119	-0.757310186982956	0.448864049230013	0.680413368494544
ENSMUSG00000001493.9	0.144048548896892	2.04666396042304	4.05459644924663	0.504776242479896	0.613716004026025	NA
ENSMUSG00000001494.6	0.144048548896892	2.04666396042304	4.05459644924663	0.504776242479896	0.613716004026025	NA
ENSMUSG00000001496.14	0	NA	NA	NA	NA	NA
ENSMUSG00000001497.17	1.64506021997358	-0.134985065688944	1.72305657802997	-0.0783404720483858	0.937557224330711	NA
ENSMUSG00000001504.10	0	NA	NA	NA	NA	NA
ENSMUSG00000001506.10	0.150585938397506	1.06692664555661	4.0430678696176	0.26389036245823	0.791864402142933	NA
ENSMUSG00000001507.15	14.0493996713763	0.302130728313463	0.663747031286478	0.455189573846939	0.648972860670358	0.819780125226655
ENSMUSG00000001508.14	0	NA	NA	NA	NA	NA
ENSMUSG00000001510.8	0	NA	NA	NA	NA	NA
ENSMUSG00000001517.13	5.40288728316196	-0.231907808204273	1.04125162257148	-0.222720237046596	0.823753250049715	NA
ENSMUSG00000001518.11	33.7682523879607	0.626468978048297	0.515645175496542	1.21492260146725	0.224395612650969	0.459265457688666
ENSMUSG00000001520.11	0	NA	NA	NA	NA	NA
ENSMUSG00000001521.11	3.91410890399076	0.661053607286856	1.20515876182484	0.54851993631602	0.583334943995767	NA
ENSMUSG00000001524.13	19.6252637490923	0.111775435851604	0.566699953682124	0.197239182966833	0.843640369262043	0.928366733769984
ENSMUSG00000001525.10	568.503866660682	-0.601921526437102	0.237145450903961	-2.53819554262024	0.0111425706832935	0.0596243105300447
ENSMUSG00000001542.6	56.3083658459753	-1.01281584496463	0.398889834334427	-2.53908662940628	0.011114229914217	0.0595434833013219
ENSMUSG00000001552.13	7.49116903530183	-1.03748194504872	0.964212079324052	-1.07598936716913	0.281932011763035	NA
ENSMUSG00000001555.9	0	NA	NA	NA	NA	NA
ENSMUSG00000001558.5	0	NA	NA	NA	NA	NA
ENSMUSG00000001566.9	0	NA	NA	NA	NA	NA
ENSMUSG00000001569.10	140.733042449928	0.341351549225658	0.325350938342707	1.04917954429287	0.294095491466531	0.541960122002041
ENSMUSG00000001576.13	31.827359695362	-0.0102447426229255	0.493322337749133	-0.0207668330399733	0.983431655430313	0.991382069516393
ENSMUSG00000001583.12	0	NA	NA	NA	NA	NA
ENSMUSG00000001588.11	156.711452251617	-0.185737315297607	0.280774869640906	-0.661516878398531	0.508280894073597	0.725767018570388
ENSMUSG00000001604.13	0.144048548896892	2.04666396042304	4.05459644924663	0.504776242479896	0.613716004026025	NA
ENSMUSG00000001622.14	0.150585938397506	1.06692664555661	4.0430678696176	0.26389036245823	0.791864402142933	NA
ENSMUSG00000001627.10	345.828523707772	0.0143778597489266	0.256953575707746	0.0559550872538927	0.955377586248943	0.98138356639039
ENSMUSG00000001630.12	37.9887903976361	-0.747000635524678	0.459321095866765	-1.62631466798851	0.103882733017095	0.285652615813067
ENSMUSG00000001632.15	182.259353994338	-0.131126582754811	0.276374950708141	-0.474451763514864	0.635177787790127	0.811443160526542
ENSMUSG00000001642.17	149.628229791263	-0.187524075828808	0.27685252509802	-0.677342840786498	0.498188455369626	0.716791550167267
ENSMUSG00000001655.6	0.288097097793785	2.56009459768791	4.02323148779407	0.636327938239418	0.524562698846668	NA
ENSMUSG00000001656.3	0	NA	NA	NA	NA	NA
ENSMUSG00000001657.7	0.136101049531713	0.482435301901315	4.03120216577034	0.11967529338959	0.904740372691678	NA
ENSMUSG00000001661.5	0	NA	NA	NA	NA	NA
ENSMUSG00000001663.9	0.115931271564006	0.29763893709183	4.04178928838603	0.0736403894055258	0.941296532270958	NA
ENSMUSG00000001665.9	0.657512587750212	1.11772104094339	2.69479351483008	0.414770569541714	0.678309866123378	NA
ENSMUSG00000001666.8	4.61330633491964	0.156360330927582	1.09695808446212	0.142539932147227	0.886653540071484	NA
ENSMUSG00000001670.12	0	NA	NA	NA	NA	NA
ENSMUSG00000001672.13	0	NA	NA	NA	NA	NA
ENSMUSG00000001674.10	202.212216991941	0.823037841485644	0.255658472627561	3.21928639026422	0.00128510066965789	0.0107453898559149
ENSMUSG00000001687.14	388.457836779759	1.04330139938775	0.254799774626621	4.09459310125603	4.22910450786367e-05	0.000629536594907596
ENSMUSG00000001700.9	429.895867576226	-0.932701906865684	0.232211454521326	-4.01660593698243	5.90423291010638e-05	0.000824675648677845
ENSMUSG00000001707.7	47.6874319947354	1.97296471524552	0.416379898524252	4.7383764735958	2.154372906739e-06	4.83769301138555e-05
ENSMUSG00000001729.13	110.71399860932	0.407217616574673	0.299446770164041	1.35989984581097	0.173861619803841	0.39252305872271
ENSMUSG00000001739.13	3.67955757316983	1.59740187147196	1.60732132405115	0.993828581484762	0.320306328818601	NA
ENSMUSG00000001741.10	630.094413794416	-0.740134823040805	0.228124196842587	-3.24443804420941	0.00117682615304981	0.0100152445309995
ENSMUSG00000001750.14	43.6190139619227	-0.332246996291691	0.432195744888419	-0.768741942097252	0.442046520811924	0.675405651743287
ENSMUSG00000001751.9	13.1609527548654	0.58942715536934	0.744326359204562	0.791893432336914	0.428422816796074	0.665490145461893
ENSMUSG00000001755.11	12.5037366916391	-0.140699933866468	0.695903335549951	-0.202183157744569	0.839773539407587	0.927131388343696
ENSMUSG00000001761.7	5.217899270953	-0.24076462207492	1.04450238569882	-0.230506531503839	0.817698188722591	NA
ENSMUSG00000001763.13	0.150585938397506	1.06692664555661	4.0430678696176	0.26389036245823	0.791864402142933	NA
ENSMUSG00000001767.5	118.152403158576	-0.691822582517087	0.304708653694314	-2.27043956293781	0.0231809263401643	0.102333858507324
ENSMUSG00000001768.14	4.03906909305409	-1.37560985801575	1.19430217279216	-1.15181056298316	0.249398926323189	NA
ENSMUSG00000001773.12	0	NA	NA	NA	NA	NA
ENSMUSG00000001774.7	89.5037136002081	0.126638257161816	0.325646353994831	0.38888277300911	0.697362866260337	0.848939812950385
ENSMUSG00000001783.3	193.971853329482	-0.21856168282474	0.261083095884458	-0.837134560873539	0.402516935657127	0.64396722097321
ENSMUSG00000001785.10	140.797258000649	0.875174955269065	0.282381976943307	3.09925925422915	0.00194005175185395	0.0151747320663195
ENSMUSG00000001786.13	73.2493163649139	-0.0153750901465829	0.343209923934777	-0.0447979183419671	0.964268384351285	0.983937995607028
ENSMUSG00000001794.11	112.973836579604	-0.292560583104859	0.31174149277534	-0.938471746254502	0.348002030137868	0.598106362120236
ENSMUSG00000001802.15	0	NA	NA	NA	NA	NA
ENSMUSG00000001804.9	0	NA	NA	NA	NA	NA
ENSMUSG00000001815.14	0	NA	NA	NA	NA	NA
ENSMUSG00000001819.4	0	NA	NA	NA	NA	NA
ENSMUSG00000001823.5	0	NA	NA	NA	NA	NA
ENSMUSG00000001827.10	0	NA	NA	NA	NA	NA
ENSMUSG00000001829.15	41.8000462659776	0.639979337818253	0.418861464249788	1.52790216441731	0.126536830750011	0.321683576674946
ENSMUSG00000001833.15	511.360518367008	0.822542458072371	0.218787933630116	3.75954214853076	0.000170224598641039	0.00200631842014726
ENSMUSG00000001844.9	28.1841030725507	-0.202562835357714	0.501666502265392	-0.403779870577354	0.686374600057543	0.842088558234009
ENSMUSG00000001847.13	215.15274281779	-0.510855688825047	0.259033818247461	-1.97215827756133	0.0485915408965382	0.172333725422018
ENSMUSG00000001855.14	123.919519548731	0.441433692063538	0.324087951086429	1.36207992485909	0.173172663053178	0.391584124286345
ENSMUSG00000001864.12	0.206713883009836	2.79199501225836	4.01367463718946	0.695620663017525	0.486666422381175	NA
ENSMUSG00000001865.2	0.0626653341129435	1.93703867970293	4.04540729808436	0.47882414228604	0.632063740172013	NA
ENSMUSG00000001870.14	0.759918080900566	0.448736796397934	2.33165928113934	0.192453846077658	0.847386717547566	NA
ENSMUSG00000001891.15	57.1526181492988	-0.369760085825359	0.397774357627354	-0.929572454169507	0.352592495095934	0.602403857785031
ENSMUSG00000001901.14	0.38255509157896	1.57552974270543	3.53812551985106	0.445300692094088	0.656102467784276	NA
ENSMUSG00000001909.14	107.448495211195	0.544301520899206	0.327606960996194	1.66144675083852	0.0966237550194092	0.272574028913769
ENSMUSG00000001910.4	179.350032217133	0.637331902085946	0.276152773460371	2.30789607542147	0.0210049174056394	0.0955448505775159
ENSMUSG00000001911.15	17.8800886400735	0.700662447093057	0.592922298932207	1.18171040008932	0.237320630271641	0.475414831864308
ENSMUSG00000001918.16	396.983723516142	2.29740276968844	0.249464646863259	9.20933205797185	3.28160547289906e-20	5.7622313242497e-18
ENSMUSG00000001924.14	630.128027027206	0.446244830215228	0.223791291224194	1.994022322201	0.0461496151225908	0.16572257450533
ENSMUSG00000001930.16	0.206713883009836	2.79199501225836	4.01367463718946	0.695620663017525	0.486666422381175	NA
ENSMUSG00000001942.7	6.39776769365734	-0.156623077137549	0.962755075504659	-0.162682161977126	0.870768692555767	NA
ENSMUSG00000001943.7	0.115931271564006	0.29763893709183	4.04178928838603	0.0736403894055258	0.941296532270958	NA
ENSMUSG00000001946.12	2.14047110815385	0.257742320358415	1.79155164844961	0.143865414419653	0.885606746819592	NA
ENSMUSG00000001948.9	0	NA	NA	NA	NA	NA
ENSMUSG00000001962.8	13.9828914599447	0.0975135879667801	0.692763447953041	0.140760295963811	0.888059309927166	0.949888765374125
ENSMUSG00000001964.13	66.5174853313393	-0.136168978247286	0.368750397704564	-0.369271407149457	0.711925435614913	0.85874196663826
ENSMUSG00000001983.7	13.661482701209	0.161819116048302	0.695638122754473	0.232619677897406	0.81605674568797	0.914584966474963
ENSMUSG00000001985.9	0.645290309147684	2.26782733018714	2.89324487884571	0.783835252511329	0.433136785724235	NA
ENSMUSG00000001986.15	4.54620439626384	-0.0328073785560507	1.13413917626732	-0.028927118683993	0.976922717086264	NA
ENSMUSG00000001988.8	0	NA	NA	NA	NA	NA
ENSMUSG00000001995.8	88.6759424339886	-0.429717696327389	0.334547553131744	-1.2844741870169	0.198976089792301	0.424811483020586
ENSMUSG00000001998.14	71.0830436180829	-0.201232122118701	0.362143034004451	-0.555670282798336	0.578436275287645	0.775575146107978
ENSMUSG00000001999.14	17.3763968849662	0.468154997038044	0.606242746265335	0.772223667700836	0.439981966032944	0.674110766491962
ENSMUSG00000002006.11	2.16512647094882	0.437828161892671	1.51029794838489	0.289895223893327	0.771896395594815	NA
ENSMUSG00000002007.5	0	NA	NA	NA	NA	NA
ENSMUSG00000002010.16	143.612978186418	-0.382047541928896	0.328770878714821	-1.16204799957446	0.245215968121806	0.484955675846941
ENSMUSG00000002012.12	0.150585938397506	1.06692664555661	4.0430678696176	0.26389036245823	0.791864402142933	NA
ENSMUSG00000002014.11	71.652726750125	-0.249793805480193	0.348824234238749	-0.716102211262146	0.473928238492098	0.699090065743502
ENSMUSG00000002015.5	83.245152255623	-0.449095442686462	0.335615829485757	-1.33812354254739	0.180856167480814	0.401873677817655
ENSMUSG00000002017.9	40.1591416267433	1.53667345700221	0.45455931478151	3.38057852304894	0.000723334037473145	0.00665622038333577
ENSMUSG00000002020.14	0	NA	NA	NA	NA	NA
ENSMUSG00000002028.11	730.633813702361	0.689721059948612	0.264048630338016	2.61209860875127	0.00899882942365113	0.0507383378045283
ENSMUSG00000002031.10	40.0747457254747	-1.18256403817044	0.440889780157588	-2.68222147890966	0.00731350228692407	0.043247679502883
ENSMUSG00000002032.15	1.52276299158371	2.83842231807848	2.04270559772442	1.38954057855449	0.164668430556348	NA
ENSMUSG00000002033.12	282.741830810125	-0.803272637535274	0.27250045479263	-2.94778457579661	0.00320060016064005	0.0229291954888817
ENSMUSG00000002043.15	12.7649959708542	0.21952600584524	0.69816763684231	0.314431655466182	0.753193216828581	0.879304536986854
ENSMUSG00000002052.6	363.19900020796	0.6294590028943	0.261427464144357	2.40777687590896	0.0160499868155929	0.0788208256628775
ENSMUSG00000002055.8	7.97181624137804	-0.773770805330768	0.914140404480441	-0.84644634624869	0.397303793092769	NA
ENSMUSG00000002057.4	0	NA	NA	NA	NA	NA
ENSMUSG00000002058.12	6.80295711748709	-1.07977575290258	0.966228270118772	-1.11751620843163	0.263773673268512	NA
ENSMUSG00000002059.16	0.468145600767436	2.4470906748974	3.29526284392099	0.742608644834426	0.457718653147517	NA
ENSMUSG00000002064.10	47.0306140223518	0.0424071080871167	0.408365790344069	0.103845887902085	0.91729165002186	0.966374110051191
ENSMUSG00000002068.15	4.33780211296671	-0.428268558216499	1.18553704867706	-0.36124434803147	0.717916792348496	NA
ENSMUSG00000002076.10	1.17840564172346	1.44342265913552	2.14432936739493	0.673134771683456	0.500861554227507	NA
ENSMUSG00000002083.11	41.0164942595245	-1.40146224090747	0.502942687562487	-2.78652473843423	0.00532765514172894	0.0336557597940057
ENSMUSG00000002100.14	0	NA	NA	NA	NA	NA
ENSMUSG00000002102.14	189.651940527629	-0.353895768704104	0.261908561789545	-1.35121878523572	0.1766253587555	0.396473933402642
ENSMUSG00000002103.14	21.3762345500828	-0.101677633754687	0.55270495495363	-0.183963673282461	0.85404195302386	0.933101836675212
ENSMUSG00000002104.10	1.43996966693519	1.69237685244188	1.93328466484394	0.875389373958798	0.381362079533787	NA
ENSMUSG00000002105.14	7.4754567529964	0.415713177259412	0.875204864740926	0.474989564166179	0.63479441159547	NA
ENSMUSG00000002107.17	94.5768402742245	-0.452206697374957	0.331330447100964	-1.36482083470331	0.172309368754276	0.390658711136177
ENSMUSG00000002108.9	0.206713883009836	2.79199501225836	4.01367463718946	0.695620663017525	0.486666422381175	NA
ENSMUSG00000002109.13	87.523632786997	-0.287073267750975	0.338716677551824	-0.847532131650212	0.396698585138823	0.638577105057892
ENSMUSG00000002111.8	0.757056073739299	-1.11881021759819	2.51249224916655	-0.445298972750792	0.656103710134702	NA
ENSMUSG00000002129.10	115.689534951053	0.178645837425756	0.295896934151749	0.603743455260468	0.546014218212707	0.753371724655224
ENSMUSG00000002147.17	492.48285108205	0.995122869288344	0.254842596949052	3.90485296101141	9.42826928757263e-05	0.00122169923117884
ENSMUSG00000002190.12	0	NA	NA	NA	NA	NA
ENSMUSG00000002204.8	0.125330668225887	2.27160461047965	4.03614422430032	0.562815520021077	0.573560510917365	NA
ENSMUSG00000002205.14	40.6966108861997	-0.131937764258306	0.432204139465489	-0.305267238813294	0.760162625442184	0.884467796137571
ENSMUSG00000002210.10	55.0396612447698	0.0147833361311354	0.384683528756311	0.0384298651385729	0.96934494962621	0.986077553391335
ENSMUSG00000002221.10	77.3858143155415	-0.0735994597898171	0.345290544196883	-0.213152259819345	0.831208203670887	0.922325945883971
ENSMUSG00000002222.13	430.16506880519	-1.31048439546321	0.237598662296906	-5.51553776774051	3.47715058996359e-08	1.20634692242124e-06
ENSMUSG00000002227.14	39.4706649420824	0.223497815111924	0.449599456340451	0.497104282400831	0.619115514903183	0.802843992498415
ENSMUSG00000002228.7	8.43261297384201	-0.677685554468371	0.875920376236444	-0.773683970431392	0.439117701537201	NA
ENSMUSG00000002233.12	0.70509363609936	0.923860895346346	2.60216349179021	0.355035684061019	0.722562858361613	NA
ENSMUSG00000002240.11	0	NA	NA	NA	NA	NA
ENSMUSG00000002249.16	0.342814932541549	2.13816357269572	3.74763282236582	0.570537102763961	0.568313464655884	NA
ENSMUSG00000002250.14	27.7869508184917	1.47539848522113	0.530426466478476	2.78153255627752	0.00541029038817413	0.0340930508235042
ENSMUSG00000002257.7	208.528424358129	-0.356640352128442	0.259171770266313	-1.37607715439832	0.168797747658388	0.386056334955793
ENSMUSG00000002265.14	0.224021653816275	-1.22679238043995	4.01216551260656	-0.305768138573861	0.759781189048016	NA
ENSMUSG00000002266.14	0.144048548896892	2.04666396042304	4.05459644924663	0.504776242479896	0.613716004026025	NA
ENSMUSG00000002274.11	7.56968948475132	-0.890110296689562	0.914106870988084	-0.973748611830712	0.330181374028703	NA
ENSMUSG00000002279.17	18.1764944547589	0.123577220474596	0.592618911389241	0.208527298234378	0.834817270181112	0.924066356958483
ENSMUSG00000002280.9	31.9175254542647	-0.207402104561322	0.4670480165942	-0.444070196622902	0.656991833219138	0.823972975507226
ENSMUSG00000002289.14	3.31755664955609	0.711051897326163	1.27205334726432	0.558979620513047	0.576175628718109	NA
ENSMUSG00000002297.14	68.1800708193051	-0.969309870908192	0.373792102411204	-2.59317910853522	0.00950932331356761	0.0530942360739362
ENSMUSG00000002307.14	128.819117169066	-0.458715149001904	0.299253863412213	-1.53286291368622	0.125309635283841	0.319550711909357
ENSMUSG00000002308.14	10.2933457292046	0.180760369648348	0.775392959271701	0.233120983995172	0.815667460879942	0.914549884746256
ENSMUSG00000002319.14	144.799323428898	2.31471031552396	0.349036862733374	6.63170731422755	3.31826063387493e-11	2.08396456159561e-09
ENSMUSG00000002320.14	53.693453874962	0.589478560095427	0.389154948052623	1.51476568149845	0.129831754284091	0.325582166674533
ENSMUSG00000002324.7	0.906789511738106	-0.686053706077875	2.19810423275724	-0.312111544054173	0.754955753574813	NA
ENSMUSG00000002325.13	183.565851170756	0.213636700385994	0.270117371570624	0.790903225304549	0.429000466143674	0.666026707091334
ENSMUSG00000002326.5	19.1586681865078	0.0952727187678032	0.584227659637676	0.163074645981139	0.87045966213036	0.943016234320022
ENSMUSG00000002329.6	69.1418935871325	-0.316875295274431	0.350211459732041	-0.904811326039654	0.36556535037659	0.612202624893486
ENSMUSG00000002332.14	12.9970205869823	0.00120107225542795	0.685821705801887	0.0017512893588336	0.998602673973358	0.999372285969688
ENSMUSG00000002341.8	0.58924327718811	2.54540761887065	3.27363180347154	0.777548536818148	0.436835210061124	NA
ENSMUSG00000002342.16	44.6890495516701	0.262636830656393	0.408762350563425	0.642517174819017	0.520537441488355	0.736221529516695
ENSMUSG00000002343.10	12.1264357523146	1.1530843588523	0.748062646623599	1.54142753158011	0.123212767681702	0.316454523323392
ENSMUSG00000002345.16	2.98269238906989	-0.764590919947451	1.50925023162547	-0.506603148984767	0.612433298407398	NA
ENSMUSG00000002346.15	10.6227435278741	-0.142486969390581	0.758274924887876	-0.187909377870632	0.850947691215984	0.93173249366535
ENSMUSG00000002365.9	34.9236937318578	1.53478124507558	0.453987444349674	3.38066892416841	0.000723096122774472	0.00665622038333577
ENSMUSG00000002372.8	197.200256427621	0.346617719650659	0.259263954751775	1.33692984812531	0.181245536759994	0.402227649802163
ENSMUSG00000002379.6	29.832340080581	0.599323096791412	0.474549433066466	1.26293080347537	0.206614048627554	0.43566362036772
ENSMUSG00000002384.2	0.447975822799729	2.46261404800298	3.35057805209214	0.73498184782333	0.462350549237233	NA
ENSMUSG00000002393.13	7.01865257082059	1.02019168647505	0.905468494809322	1.12670036817779	0.259869186731275	NA
ENSMUSG00000002395.13	184.269609559378	-0.15773929959478	0.271481011221106	-0.581032532939513	0.561218527578022	0.763269115999134
ENSMUSG00000002396.8	28.423275338242	0.362795231685299	0.51259044969791	0.707768222952863	0.479089202956551	0.702827536613498
ENSMUSG00000002409.16	22.4813056096465	-0.189430873905374	0.553227734625807	-0.342410298777774	0.732042139111989	0.867799747164447
ENSMUSG00000002413.14	228.115869445041	-0.434202756993869	0.286846981718451	-1.51370864839726	0.130099750514092	0.326159164750363
ENSMUSG00000002416.12	22.6532160778931	0.515457148383718	0.556751750638816	0.925829416418149	0.354534637252005	0.604282095664867
ENSMUSG00000002428.11	122.056801391504	-0.755401334804646	0.300140325028708	-2.51682720318368	0.0118416889531424	0.0625450532552716
ENSMUSG00000002455.13	147.830321001752	-0.147627261868063	0.306340629191003	-0.481905590707713	0.629873014395449	0.808410066237767
ENSMUSG00000002458.12	82.9055493329591	0.162362194298745	0.32569368229412	0.498511955021966	0.618123245029859	0.80218760827317
ENSMUSG00000002459.16	0.0626653341129435	1.93703867970293	4.04540729808436	0.47882414228604	0.632063740172013	NA
ENSMUSG00000002475.14	0.224021653816275	-1.22679238043995	4.01216551260656	-0.305768138573861	0.759781189048016	NA
ENSMUSG00000002477.4	41.3304875289139	-0.0350030589700494	0.429728783826857	-0.0814538385312178	0.935081034353242	0.973567177458407
ENSMUSG00000002486.14	11.8757392215056	0.480739344357159	0.731714880846861	0.657003645738035	0.511178572268439	0.728416766445454
ENSMUSG00000002489.14	95.4033152777111	0.555559433150767	0.318550447749476	1.74402339433435	0.0811550105838131	0.242030402448225
ENSMUSG00000002496.9	86.504446006763	0.756004254541675	0.331245291730318	2.28230943477733	0.0224710779174493	0.100280681743638
ENSMUSG00000002500.14	0	NA	NA	NA	NA	NA
ENSMUSG00000002504.13	0.463725086256024	-0.368494446110427	3.92295192587016	-0.0939329497464312	0.925162419432901	NA
ENSMUSG00000002524.14	368.307005252583	-0.0267339867132795	0.230271999421204	-0.116097427305431	0.907575327740408	0.960607469538501
ENSMUSG00000002546.15	98.0251353160313	-0.138811465697622	0.319008028557572	-0.435134709070716	0.663464650937582	0.828392084845009
ENSMUSG00000002550.15	78.030487138644	0.000487031743839543	0.339703434086334	0.00143369685134171	0.99885607580933	0.999372285969688
ENSMUSG00000002565.15	7.5105672331867	-0.890001216223117	0.914361354963937	-0.973358302372938	0.330375255187156	NA
ENSMUSG00000002578.14	42.1782670249571	-0.252168709736533	0.422146401962087	-0.597348949474597	0.550274429845907	0.756158676185528
ENSMUSG00000002580.7	24.9949902978441	-0.238292128635079	0.515821428962641	-0.461966322559154	0.644105471372337	0.816538702774876
ENSMUSG00000002588.11	0.0626653341129435	1.93703867970293	4.04540729808436	0.47882414228604	0.632063740172013	NA
ENSMUSG00000002602.15	12.7529223374318	-0.138951830185173	0.690322930659982	-0.201285259425365	0.840475527963153	0.927141203239704
ENSMUSG00000002603.14	130.428943550097	1.99965721647927	0.370032218004277	5.40400840571174	6.51678884055258e-08	2.10001689828144e-06
ENSMUSG00000002608.7	55.0067679881827	0.429682330856072	0.387806802892784	1.10798038520965	0.26787028709308	0.512851791310383
ENSMUSG00000002617.13	15.1487006689918	-0.247242471312727	0.695758145825139	-0.355356919349478	0.722322218785874	0.862935347186012
ENSMUSG00000002625.9	94.7118752125986	0.103466924893342	0.324747166181589	0.318607629775239	0.750024067028754	0.877847442610665
ENSMUSG00000002633.4	0	NA	NA	NA	NA	NA
ENSMUSG00000002635.10	39.2767336724252	0.274874925071139	0.433032819349216	0.634766957119406	0.525580416834829	0.740288571681324
ENSMUSG00000002658.9	88.6956208614613	-0.223479640756148	0.323778086556471	-0.690224725005193	0.490052876994385	0.710671659136977
ENSMUSG00000002660.7	33.957613410423	0.786911007316857	0.466682607708966	1.68618027395525	0.091761082121151	0.262820356381619
ENSMUSG00000002661.13	11.2285847484665	-0.377303465428893	0.732658872814473	-0.514978360910993	0.606568141285059	0.794976814879152
ENSMUSG00000002664.2	0.213251272510449	1.55031693787114	4.01748495654645	0.385892406478068	0.699576354640962	NA
ENSMUSG00000002668.7	55.0723488604192	0.730691117171952	0.392532013726631	1.86148159034189	0.0626761980317226	0.203573426902582
ENSMUSG00000002679.13	31.8435488632921	-0.454744396054898	0.502153793789129	-0.905587892951098	0.36515401935908	0.612075819708849
ENSMUSG00000002688.7	0	NA	NA	NA	NA	NA
ENSMUSG00000002699.11	813.161006509834	2.31811144175068	0.250906120385332	9.23895932945204	2.48906214157894e-20	4.55657248215856e-18
ENSMUSG00000002718.13	191.116589875498	-0.151688637119561	0.274046927582987	-0.553513365237882	0.579911931255108	0.776827379187131
ENSMUSG00000002728.13	57.7024200842981	-0.483664222326924	0.386711691206587	-1.25071011124032	0.211040260112124	0.442263766728175
ENSMUSG00000002731.6	5.76480627316563	-0.493048165442837	1.02544388939564	-0.480814377599363	0.630648430808227	NA
ENSMUSG00000002732.13	1.05444595814152	0.137413560332734	2.05885289480159	0.0667427773396003	0.946786478822442	NA
ENSMUSG00000002733.8	61.3588636957453	-0.332791786496603	0.367663165839014	-0.905154003494384	0.36538380575468	0.612202624893486
ENSMUSG00000002741.9	124.712939206609	0.138538767173319	0.295914260411848	0.46817198664405	0.639661603375633	0.81390837554628
ENSMUSG00000002748.7	295.548813212622	0.484059359438737	0.253969584615137	1.90597374158908	0.0566536125515809	0.190558124469821
ENSMUSG00000002763.15	40.0876502462863	0.876974120156391	0.43615719865413	2.01068358578629	0.0443588888824417	0.161698036521335
ENSMUSG00000002767.12	37.935411307273	0.329165210251855	0.43514332249035	0.756452399103871	0.449378001720452	0.681072454959092
ENSMUSG00000002768.7	51.732289933661	0.857525036462408	0.384948009137734	2.22763858003377	0.0259046258019887	0.110338317029857
ENSMUSG00000002769.8	0.294634487294398	1.91768856982358	3.95435588034158	0.48495598976234	0.627707564583024	NA
ENSMUSG00000002771.10	1.55494182804706	0.728268953637811	1.78173269227119	0.408741982900634	0.682729020541426	NA
ENSMUSG00000002778.11	38.9482020230363	-0.294344199936802	0.43759573696762	-0.672639550779222	0.501176633419408	0.720072716060606
ENSMUSG00000002781.16	5.20521117922154	-0.342226835429478	1.06187479299193	-0.322285487599928	0.747236426322857	NA
ENSMUSG00000002797.8	8.68342080374103	-0.535138047903832	0.831976465345385	-0.643212963580257	0.520085922694562	NA
ENSMUSG00000002799.5	5.55781040890114	-0.108201194671138	1.02205879105341	-0.105865920452206	0.915688733615394	NA
ENSMUSG00000002803.12	52.5287388172021	-0.0245046728419365	0.384350838885022	-0.0637560019721123	0.949164512282478	0.978623303017189
ENSMUSG00000002804.3	9.11349059703835	0.0654403626375334	0.823566930393934	0.0794596774377907	0.936667002906226	NA
ENSMUSG00000002808.6	0.349352322042162	0.384986153477465	3.6935546497984	0.10423188228675	0.91698533335733	NA
ENSMUSG00000002812.4	379.304909114645	0.108438904942973	0.235836353789554	0.459805722063261	0.645655675661645	0.817064484982025
ENSMUSG00000002814.14	81.8277010880191	-0.388951358282938	0.341512721672997	-1.1389073776741	0.254741788135142	0.496893753143224
ENSMUSG00000002820.5	52.4995421839235	0.228273520861671	0.385395000601613	0.592310539849582	0.55364265933786	0.758404942038362
ENSMUSG00000002825.6	40.1418116692964	0.978340861038442	0.457247841050423	2.13962926274496	0.0323847398033004	0.129538959213202
ENSMUSG00000002831.12	0	NA	NA	NA	NA	NA
ENSMUSG00000002833.10	61.2163143543983	0.126014260907722	0.368452549680089	0.342009469108397	0.732343766189465	0.867834076063712
ENSMUSG00000002835.8	6.43447579875531	-1.33147035206306	0.986570259777174	-1.34959506316741	0.177145908614076	NA
ENSMUSG00000002844.8	41.1010875183035	0.593996863884445	0.415532751727317	1.4294826615117	0.152865554857505	0.362529006062285
ENSMUSG00000002845.13	42.4195994497765	0.49478003390069	0.446631821857986	1.10780291436111	0.26794694119016	0.512884423136849
ENSMUSG00000002846.9	21.6481712632084	1.22641044572111	0.559784630026847	2.19086123472575	0.0284618357335833	0.118172799596266
ENSMUSG00000002847.6	0.125330668225887	2.27160461047965	4.03614422430032	0.562815520021077	0.573560510917365	NA
ENSMUSG00000002870.8	104.596982759136	-0.0928522371717571	0.306335042145255	-0.303106809203138	0.76180846511534	0.88563708064483
ENSMUSG00000002871.13	37.0145854715274	0.153867567705668	0.449168492972834	0.342560910021295	0.731928813814416	0.867799747164447
ENSMUSG00000002881.13	299.461153668136	0.325485031018592	0.245654818431639	1.32496904842585	0.185181417344877	0.408015599189582
ENSMUSG00000002885.13	340.156363613507	-0.357167260590135	0.23805480179443	-1.50035730385545	0.133521873065193	0.331359156577132
ENSMUSG00000002897.4	566.062258172254	-0.820293144654681	0.221295109290638	-3.70678388367521	0.000209907919782566	0.0023732559025088
ENSMUSG00000002900.14	0	NA	NA	NA	NA	NA
ENSMUSG00000002908.14	0.144048548896892	2.04666396042304	4.05459644924663	0.504776242479896	0.613716004026025	NA
ENSMUSG00000002910.10	29.634934274079	-0.309363711025361	0.481885872480839	-0.641985434087741	0.520882640568576	0.736390772174174
ENSMUSG00000002930.6	0	NA	NA	NA	NA	NA
ENSMUSG00000002944.14	0.136101049531713	0.482435301901315	4.03120216577034	0.11967529338959	0.904740372691678	NA
ENSMUSG00000002948.17	124.751347971767	0.323796446400594	0.297871947080273	1.08703236264586	0.277022507522164	0.521439871958148
ENSMUSG00000002949.13	93.3990277688794	0.461985961043879	0.313527517198638	1.47351009305886	0.140613544344286	0.342920711668481
ENSMUSG00000002957.10	219.543992216441	-0.108627409150927	0.27418009572859	-0.396189989146613	0.691964875882742	0.845379798372259
ENSMUSG00000002963.15	66.4818639804536	0.360777091065435	0.348687600328413	1.03467140995446	0.300822392244783	0.548945039846048
ENSMUSG00000002968.7	52.6464531071541	0.837352876939312	0.379899935771558	2.20414061202377	0.0275144567959629	0.115367634635704
ENSMUSG00000002980.13	0.70509363609936	0.923860895346346	2.60216349179021	0.355035684061019	0.722562858361613	NA
ENSMUSG00000002981.9	188.504969321481	0.500226601294244	0.263217910745962	1.90042767179709	0.05737701836324	0.192378682706578
ENSMUSG00000002983.15	424.923269846594	1.30285407549854	0.224261761728361	5.80952394852154	6.26507321447869e-09	2.47269219896214e-07
ENSMUSG00000002984.15	105.982959876897	1.96916711150543	0.309647888003018	6.3593752381293	2.02575989382785e-10	1.07590358805524e-08
ENSMUSG00000002985.14	9.65521639988393	1.13045778766024	0.812467397004784	1.39138849365248	0.164107651900067	0.378649031093638
ENSMUSG00000002992.15	0	NA	NA	NA	NA	NA
ENSMUSG00000002996.16	410.11697718332	-1.94240666630439	0.310727050990204	-6.25116693288999	4.07397137962133e-10	2.03148130702821e-08
ENSMUSG00000002997.14	2.64671959968866	-1.69719031666237	1.46734702758738	-1.15663867153014	0.247420015661797	NA
ENSMUSG00000003031.13	412.402813397493	-1.71928831473947	0.299712272535195	-5.73646284216665	9.66742471520525e-09	3.69682321109449e-07
ENSMUSG00000003032.8	15.543332428807	-0.053932395840928	0.6950021717768	-0.0776003270652345	0.938145982207014	0.974856042380332
ENSMUSG00000003033.13	79.4575203410967	0.484289587299764	0.330694904435134	1.46446038570503	0.143068199296624	0.347238021649692
ENSMUSG00000003037.15	269.488178286133	-0.368703136714946	0.24777536007562	-1.48805408496801	0.136736630861558	0.336421041650927
ENSMUSG00000003038.14	76.8102917024133	-0.692336040801834	0.370488999365728	-1.86870876594744	0.0616633437766741	0.201424225457291
ENSMUSG00000003039.8	112.696400934833	-1.03621226409496	0.319045323568774	-3.24785285207792	0.00116279388335477	0.00992527636149253
ENSMUSG00000003051.12	0.144048548896892	2.04666396042304	4.05459644924663	0.504776242479896	0.613716004026025	NA
ENSMUSG00000003053.16	0	NA	NA	NA	NA	NA
ENSMUSG00000003062.11	39.7521192350014	0.00432570339740414	0.42876172750026	0.0100888281764877	0.991950416315366	0.996234549081056
ENSMUSG00000003068.14	152.158952177944	-0.0979700068272543	0.303370635640439	-0.322938331260809	0.746741946131032	0.876889273169292
ENSMUSG00000003070.6	1.58726691026312	1.76984093297625	2.50820971920857	0.705619198993735	0.4804249815221	NA
ENSMUSG00000003072.14	86.8376549578152	0.668585195898902	0.335006234578087	1.99573956210376	0.0459622784099698	0.165195879929459
ENSMUSG00000003099.10	33.5083701776245	0.977278518282757	0.476399297686061	2.05138530436451	0.0402294390325766	0.150875941033021
ENSMUSG00000003119.13	255.329222017008	-0.0509070741408895	0.255311351329703	-0.199392129945485	0.841956016279618	0.927572876042265
ENSMUSG00000003123.14	11.0938922847899	0.28279495667994	0.741383454763087	0.381442227855366	0.70287513190521	0.8524862750088
ENSMUSG00000003131.6	214.601175722026	-0.119978835675157	0.256882079866296	-0.467058020308792	0.640458367684001	0.814548346151066
ENSMUSG00000003134.9	2.40370049846371	-0.536541711001986	1.43582511909065	-0.373681797224578	0.708641069552989	NA
ENSMUSG00000003135.14	95.0882165581072	-0.145949156772816	0.318335329590515	-0.45847615142358	0.646610392441708	0.817551185388458
ENSMUSG00000003153.9	42.8054428165585	-0.146481543253372	0.418296031159618	-0.350186309077065	0.726198880842796	0.864685188316
ENSMUSG00000003154.14	67.5076693350236	0.0756208114720451	0.358560104297965	0.210901353958788	0.832964247583711	0.923084027074994
ENSMUSG00000003161.14	175.337909969123	-0.258979021616949	0.268120559042667	-0.965905123208908	0.33409165851962	0.584208617246714
ENSMUSG00000003166.18	109.349083586753	0.397093766690477	0.308109096455768	1.28880896818145	0.197464507445703	0.423395201422258
ENSMUSG00000003184.13	142.073633784578	0.238361337796367	0.284529990204164	0.83773713141919	0.402178354441572	0.64396722097321
ENSMUSG00000003190.10	4.36472008602493	0.0303421149169551	1.13234357798459	0.0267958555220137	0.978622558846895	NA
ENSMUSG00000003198.9	21.4850447328768	-0.619349564910322	0.557719733289899	-1.11050322938526	0.266782237291241	0.511366506756593
ENSMUSG00000003199.15	39.9952940161087	-0.414446772458406	0.448565874650761	-0.923937365456258	0.355518927348467	0.605240374140524
ENSMUSG00000003200.9	127.551652792398	0.167205726935463	0.289121787448863	0.578322818251934	0.563046191650658	0.764229284266014
ENSMUSG00000003206.6	0.0879206042845622	-0.000364418712234587	4.04679653155627	-9.00511575990808e-05	0.999928149571766	NA
ENSMUSG00000003208.8	31.466910871883	0.366581974579538	0.470577513307874	0.779004444990773	0.4359770963485	0.671430963546352
ENSMUSG00000003226.6	1707.86326184827	-0.225377596052014	0.204028903612177	-1.10463562790308	0.269317506674997	0.514249406886745
ENSMUSG00000003227.4	0	NA	NA	NA	NA	NA
ENSMUSG00000003228.8	17.3413575453139	-0.395329419447125	0.63253768124322	-0.624989516308539	0.531977938796631	0.743542299218447
ENSMUSG00000003233.10	22.7528676977085	0.935478352902653	0.587954172901222	1.59107358365465	0.111593016722224	0.29790453486752
ENSMUSG00000003234.14	119.105848757469	-0.0384658000709044	0.303204106698575	-0.126864376903524	0.899047741885745	0.955106404640691
ENSMUSG00000003235.11	189.289822549986	0.259719496386069	0.271703121798939	0.955894413970929	0.339125581457763	0.588695749766213
ENSMUSG00000003269.13	93.6044310125902	-0.0928216497939498	0.314783497444366	-0.294874574263077	0.768089695592589	0.888855916728801
ENSMUSG00000003271.14	17.2235089900228	2.29284357930655	0.67735492149011	3.38499582207587	0.000711793379007057	0.00656406241476604
ENSMUSG00000003273.12	0.224021653816275	-1.22679238043995	4.01216551260656	-0.305768138573861	0.759781189048016	NA
ENSMUSG00000003279.15	0	NA	NA	NA	NA	NA
ENSMUSG00000003282.8	9.18239057401671	-2.04839771510974	0.859187133731754	-2.38411125433504	0.0171204256750365	NA
ENSMUSG00000003283.12	0.286686987929219	-0.0242087251067937	3.98779963350409	-0.0060706974601734	0.995156313974264	NA
ENSMUSG00000003299.9	30.8570055329348	0.07963865503883	0.492111204561532	0.161830607189258	0.871439249677322	0.943267510969742
ENSMUSG00000003308.13	76.1764542453657	0.440398856812019	0.351219657574266	1.25391289272838	0.209873668332914	0.440445860043385
ENSMUSG00000003309.12	1.97490698356734	0.862729552051035	1.58898621919543	0.542943382157128	0.587168785357073	NA
ENSMUSG00000003316.13	257.811860355119	-0.290961692128882	0.267759071928416	-1.0866548424797	0.277189378033059	0.521639853148828
ENSMUSG00000003341.8	0	NA	NA	NA	NA	NA
ENSMUSG00000003344.13	37.453054134566	-0.740678206838405	0.443839601650307	-1.66879702506125	0.0951576125097581	0.2695173751787
ENSMUSG00000003345.14	235.209661974548	-0.0566398171165032	0.249422358015563	-0.227083961386369	0.820358455254137	0.916992514428951
ENSMUSG00000003346.13	42.5571610103196	-0.212912162547905	0.436969007616547	-0.487247742601329	0.626082775642293	0.806868618346827
ENSMUSG00000003348.9	210.233803755623	0.35010474208246	0.259208754082237	1.3506671228063	0.17680208847263	0.396767128121677
ENSMUSG00000003352.12	2.0702431751519	0.318168793968595	1.57020699734996	0.202628567128772	0.839425359822206	NA
ENSMUSG00000003354.5	0	NA	NA	NA	NA	NA
ENSMUSG00000003355.6	0.905418527094161	0.980458491852824	2.31321834280506	0.423850387881629	0.671674927858908	NA
ENSMUSG00000003360.13	197.351295626223	0.0717199729738457	0.266222735488393	0.269398377423601	0.787623134652409	0.90067908699486
ENSMUSG00000003363.14	110.689882548684	0.219301650650628	0.315039662913898	0.696108066591489	0.486361155165801	0.70782330498081
ENSMUSG00000003378.8	5.56143097605441	1.17044638690955	1.03251553998157	1.1335871873952	0.256967749989955	NA
ENSMUSG00000003379.7	1.56790999699484	-0.324430024245557	1.75769893037988	-0.184576561229084	0.853561171469343	NA
ENSMUSG00000003380.10	209.782132673227	0.100197404545941	0.291858127717772	0.343308597671923	0.73136631343112	0.867357100036024
ENSMUSG00000003382.17	247.422840681129	0.867193106097537	0.263357435894138	3.29283698845749	0.000991819607447484	0.00868119623853321
ENSMUSG00000003402.12	91.1050638486206	1.02381458026817	0.343858730754051	2.97742790483474	0.00290677999915848	0.0213031815270525
ENSMUSG00000003410.7	0.144048548896892	2.04666396042304	4.05459644924663	0.504776242479896	0.613716004026025	NA
ENSMUSG00000003411.9	0	NA	NA	NA	NA	NA
ENSMUSG00000003418.11	667.408258559847	-1.30636290623543	0.2394169266696	-5.45643503325993	4.85788898968797e-08	1.61379447363997e-06
ENSMUSG00000003420.7	1.76310811883225	0.21193119540178	2.2588218849612	0.0938237746024938	0.925249145586208	NA
ENSMUSG00000003421.11	71.0503146160104	-0.146034443074363	0.354374983416458	-0.412090158471329	0.680273341851566	0.838412837438123
ENSMUSG00000003423.13	31.6769915707848	0.413732890346795	0.463397379928455	0.892825268909964	0.37195075207108	0.618720047918912
ENSMUSG00000003429.10	1302.68517880773	-0.762042769638375	0.218175545246223	-3.49279644874208	0.000477990712551856	0.0047599908458289
ENSMUSG00000003435.8	286.367135155316	0.124772671518894	0.260843513146841	0.478343011154945	0.632406088038895	0.809759469139187
ENSMUSG00000003436.11	1.59183340774314	2.08136316056661	1.90177269747057	1.09443319032548	0.273765033914451	NA
ENSMUSG00000003437.13	90.6495741515214	-0.631014248640765	0.355442274453441	-1.77529318821479	0.0758494895637541	0.231584546572121
ENSMUSG00000003438.16	42.8716920409344	1.37434243403921	0.420907138175104	3.26519155744862	0.00109390070895939	0.00942134304292954
ENSMUSG00000003444.8	24.4076106891583	0.414345390065891	0.526004567735553	0.787722037946639	0.430859311991608	0.667227055503204
ENSMUSG00000003452.14	0.136101049531713	0.482435301901315	4.03120216577034	0.11967529338959	0.904740372691678	NA
ENSMUSG00000003458.11	109.766537426467	0.0770195701053052	0.31860660597773	0.241738773334438	0.808982583630124	0.912003474565108
ENSMUSG00000003464.12	74.6982467901225	-0.470423491068215	0.35454851270956	-1.32682404298669	0.184566895194858	0.40728739837306
ENSMUSG00000003469.8	0	NA	NA	NA	NA	NA
ENSMUSG00000003476.14	0	NA	NA	NA	NA	NA
ENSMUSG00000003477.5	0	NA	NA	NA	NA	NA
ENSMUSG00000003484.4	0.286686987929219	-0.0242087251067937	3.98779963350409	-0.0060706974601734	0.995156313974264	NA
ENSMUSG00000003500.12	79.560169819989	0.480083236179756	0.341033819086528	1.40772911456605	0.159211297250183	0.370932575559321
ENSMUSG00000003505.14	0	NA	NA	NA	NA	NA
ENSMUSG00000003518.12	2.0734656617036	0.494538412174581	1.5913062938042	0.310775124877015	0.755971581414963	NA
ENSMUSG00000003526.10	3.00550778140181	1.06074726100507	1.3621034665903	0.778756744273178	0.436123022749159	NA
ENSMUSG00000003527.8	71.940716272081	-0.0847924520911094	0.376549436188229	-0.225182788611914	0.821837078326589	0.917607866846869
ENSMUSG00000003528.13	40.4995043374944	0.708610017068222	0.437829820347633	1.6184599224091	0.105563517194591	0.287882251011809
ENSMUSG00000003531.13	2.87774496661313	-1.40687051510315	1.39810413903676	-1.00627018819387	0.314285616982316	NA
ENSMUSG00000003534.16	31.1441604802958	1.08170343004732	0.473180877833838	2.28602524049413	0.0222527819750409	0.0998231095827145
ENSMUSG00000003541.6	3.23581423169666	1.24694645854907	1.44362784837451	0.863758938948914	0.387720328605059	NA
ENSMUSG00000003545.2	116.25818934211	1.58250989018232	0.385846407803018	4.10139853107101	4.10660579401566e-05	0.000614491065247144
ENSMUSG00000003546.9	48.6257134080082	-0.702490930143279	0.427370537529466	-1.64375142517831	0.100227558740527	0.278597898156908
ENSMUSG00000003549.8	32.5919656304841	1.1105802763437	0.468406503041938	2.37097535822269	0.0177412138586999	0.0842413929581974
ENSMUSG00000003555.7	0	NA	NA	NA	NA	NA
ENSMUSG00000003559.7	4.08810203869994	-1.49541683632513	1.1903072560448	-1.25632842170026	0.208996921362782	NA
ENSMUSG00000003573.14	5.29242501838147	0.364466833178472	1.05115850002439	0.346728712339781	0.728795137484677	NA
ENSMUSG00000003575.12	33.2408519517029	1.2160299103968	0.522326296864054	2.32810394134396	0.0199065850774303	0.0918820808313665
ENSMUSG00000003581.13	41.2191811898754	-0.327035404085181	0.42227451518558	-0.774461617560455	0.438657857606089	0.673230283549012
ENSMUSG00000003585.12	0.558889086992645	-0.664027119681589	3.05292069120716	-0.217505525641095	0.827814401234796	NA
ENSMUSG00000003604.13	22.4742934273711	-0.2696567348219	0.549187865337318	-0.491010001934899	0.623419373422926	0.805075260332638
ENSMUSG00000003617.15	0	NA	NA	NA	NA	NA
ENSMUSG00000003623.4	73.1749240907043	-1.30465567174866	0.362970404728959	-3.59438580873525	0.000325157714599323	0.00340762116493614
ENSMUSG00000003644.16	87.7669504950602	0.66459659651718	0.32367820068912	2.0532633804261	0.0400470403825306	0.150530683901832
ENSMUSG00000003657.8	0	NA	NA	NA	NA	NA
ENSMUSG00000003660.10	662.320292265588	-0.0412910789365558	0.214680520603529	-0.192337333729556	0.847477976206006	0.930310553393332
ENSMUSG00000003662.9	64.508057958415	-1.25255090503435	0.372912434649929	-3.3588338404703	0.000782721152919103	0.00712648973514917
ENSMUSG00000003665.6	0	NA	NA	NA	NA	NA
ENSMUSG00000003680.14	16.9805713948783	0.585393353286515	0.624605202497049	0.937221385518768	0.348644691495927	0.598630797371973
ENSMUSG00000003721.13	28.8071598046347	0.331295039586074	0.490530888466174	0.675380587391736	0.499433995755007	0.718103292024746
ENSMUSG00000003731.12	125.513743251515	-0.189423795625023	0.303411996285067	-0.624312149632514	0.532422606402237	0.743542299218447
ENSMUSG00000003746.14	446.154739550058	-0.237445487198485	0.226323915750014	-1.04914006286793	0.294113659630088	0.541960122002041
ENSMUSG00000003752.8	67.5480797977305	1.38608615617187	0.35143691802716	3.94405392567422	8.01156302252144e-05	0.00107202936618623
ENSMUSG00000003762.12	26.1056095202296	0.65606423978699	0.518748100367832	1.26470678026925	0.205976458519214	0.435158380189617
ENSMUSG00000003778.13	158.292996184622	-0.582222807521004	0.27968020377592	-2.08174479158876	0.0373657869583313	0.143332693263256
ENSMUSG00000003779.14	8.98401949918049	-0.384010989735573	0.865433483201144	-0.44372097589194	0.657244328153541	NA
ENSMUSG00000003808.17	98.6112194928546	0.350622261088913	0.315782790720488	1.11032732432611	0.266858002713433	0.511368876469127
ENSMUSG00000003809.13	9.66211322094845	-0.951196854967504	0.822128709937232	-1.15699262593582	0.247275373110728	0.487748122477007
ENSMUSG00000003810.11	58.3893298107679	0.604843400193397	0.385726741893319	1.5680618803471	0.116866691646127	0.306467849717549
ENSMUSG00000003812.12	15.5889030521859	-1.48151229016707	0.688271545864553	-2.15251131485627	0.0313571050874716	0.126724533664916
ENSMUSG00000003813.14	84.3664616474416	0.672893339773759	0.329094639419791	2.04468034167953	0.0408863829409631	0.15261884547681
ENSMUSG00000003814.8	958.926826469494	-0.9447912822318	0.263683003535853	-3.58305719201707	0.000339596217057431	0.00353739207210913
ENSMUSG00000003824.11	2.88667537745592	-0.147447198193056	1.35013004593278	-0.109209626611329	0.913036225049647	NA
ENSMUSG00000003847.15	232.488878434775	0.396197062459159	0.279365119550295	1.4182051900285	0.156130867097216	0.366022903967215
ENSMUSG00000003848.13	49.570812730994	1.42455573255525	0.430941057691824	3.3056857942136	0.000947442669075976	0.00836081715356892
ENSMUSG00000003849.8	0.78792874818001	0.505409019100529	2.32099673185847	0.217755161893674	0.827619881809653	NA
ENSMUSG00000003863.15	0.144048548896892	2.04666396042304	4.05459644924663	0.504776242479896	0.613716004026025	NA
ENSMUSG00000003865.13	10.5834122150467	1.51846609643095	0.755687785575955	2.00938287665142	0.0444965447626823	0.161728211714237
ENSMUSG00000003868.11	102.537423480769	1.36958339179151	0.323643595533286	4.23176423292038	2.31865389174048e-05	0.000376409397821417
ENSMUSG00000003872.7	0.592024371696621	2.81712437276257	3.00020886002798	0.938976086063654	0.347743022483165	NA
ENSMUSG00000003873.10	49.3674250227428	0.775202784522184	0.391236763327423	1.98141600479764	0.0475446403800001	0.169529252312276
ENSMUSG00000003882.4	589.70652704572	-1.56618364921482	0.261766395101858	-5.98313488102777	2.18883362411879e-09	9.27720418813696e-08
ENSMUSG00000003923.13	121.674557479401	-0.212614125448184	0.302206340321895	-0.703539592259111	0.481719542080198	0.704379381402153
ENSMUSG00000003929.10	51.025871099555	-0.654854424392399	0.399093754504866	-1.6408536014422	0.100827808459546	0.279485329892375
ENSMUSG00000003934.5	1.80656227495097	1.38613994997174	1.67667974942966	0.826717177471277	0.408397382901424	NA
ENSMUSG00000003948.15	47.0674522628881	0.354640537018846	0.401996733146968	0.882197559772684	0.377669981337948	0.622016829579337
ENSMUSG00000003949.15	6.37813248996633	-0.58147920820172	0.990576985950076	-0.587010617497857	0.557196575908669	NA
ENSMUSG00000003955.7	15.6805065564421	1.3273922559599	0.632173655602999	2.09972725721031	0.0357528404149307	0.138691361104628
ENSMUSG00000003970.8	2874.01793150866	-0.191988947737349	0.214103204345225	-0.896712164231701	0.369872528004374	0.616501981973971
ENSMUSG00000003974.6	0	NA	NA	NA	NA	NA
ENSMUSG00000003992.13	39.8903356204233	-0.157903681555341	0.428591675025403	-0.36842451861899	0.712556718006419	0.858963776679956
ENSMUSG00000004018.8	23.6194214848274	-0.704282676042112	0.545064577484311	-1.29210868791484	0.196319507612508	0.422283260874505
ENSMUSG00000004031.12	0	NA	NA	NA	NA	NA
ENSMUSG00000004032.9	0.648219801141773	0.911442708741083	2.92148336315481	0.311979428065902	0.755056157639342	NA
ENSMUSG00000004035.11	0.115931271564006	0.29763893709183	4.04178928838603	0.0736403894055258	0.941296532270958	NA
ENSMUSG00000004038.9	0	NA	NA	NA	NA	NA
ENSMUSG00000004040.15	779.220195587085	-0.384459214495046	0.218671290099364	-1.75816045316396	0.0787202120227753	0.236821225260125
ENSMUSG00000004043.13	870.613848366122	-0.82296399603271	0.238458826082963	-3.45117859360085	0.000558144099870849	0.00538164550863757
ENSMUSG00000004044.9	0.850661567125775	-1.85620171452151	2.3974262321266	-0.774247686809946	0.438784333085383	NA
ENSMUSG00000004054.8	147.396730617736	0.906532212175695	0.276470009306819	3.27895316547572	0.00104192926381159	0.00903705583249491
ENSMUSG00000004056.14	303.684464763701	0.224648166559834	0.244719812561373	0.917981115662611	0.358628752537516	0.608045513223115
ENSMUSG00000004069.15	68.7984744848763	0.37963320341786	0.348056491099898	1.09072295195006	0.275394808092907	0.520463331251542
ENSMUSG00000004070.14	43.7103307002393	-0.282751999603654	0.416578761139036	-0.678747996730644	0.49729754896571	0.716080337302742
ENSMUSG00000004071.11	105.01693722235	0.356840209549398	0.323628863540344	1.10262170575807	0.270191480111964	0.514790819690871
ENSMUSG00000004085.13	0.918944305507812	1.14580299634938	2.37363442612312	0.482720921022717	0.629293906439086	NA
ENSMUSG00000004096.8	80.6999150817752	-0.645317677207382	0.371640719742085	-1.73640196815685	0.0824927845094567	0.244326305652105
ENSMUSG00000004098.7	0.0626653341129435	1.93703867970293	4.04540729808436	0.47882414228604	0.632063740172013	NA
ENSMUSG00000004099.14	212.451761749062	-0.106712895336108	0.259027636754501	-0.411974940871839	0.680357790677937	0.838412837438123
ENSMUSG00000004100.10	195.600259912729	2.80154675546878	0.298141077275418	9.39671507553037	5.629311420189e-21	1.10078626043878e-18
ENSMUSG00000004105.7	9.54959020697548	1.5433647728159	0.808771998091379	1.90828166214716	0.0563548218290114	NA
ENSMUSG00000004110.13	1.58019709821868	0.299078458140748	1.74349747351405	0.171539369964184	0.863799676438407	NA
ENSMUSG00000004113.17	5.14074955845291	-0.221530043216973	1.08666219539996	-0.203862841787218	0.838460683204747	NA
ENSMUSG00000004127.11	14.5520675211105	0.935932063826891	0.65553975472674	1.42772739117406	0.153370338942263	0.363025693606391
ENSMUSG00000004151.15	0.611555627545705	-1.6744250846505	3.18160714867035	-0.526282789297312	0.598691739213388	NA
ENSMUSG00000004187.10	6.95729744683837	-0.938956714178056	0.937365914934069	-1.00169709525239	0.31648991003468	NA
ENSMUSG00000004207.13	347.852243176106	-0.547291498249985	0.240125768827372	-2.2791868649609	0.0226559595680247	0.100584043407268
ENSMUSG00000004221.15	138.941503372274	-0.390328323047174	0.286437952925543	-1.36269764205666	0.172977821280711	0.3912463654835
ENSMUSG00000004231.14	0	NA	NA	NA	NA	NA
ENSMUSG00000004233.13	21.5265124525488	0.369374608973364	0.550844254398651	0.670560881816959	0.502500309651803	0.721427109001187
ENSMUSG00000004263.14	4.60068560994525	1.73676918784383	1.26382436788647	1.37421720293958	0.169374261623403	NA
ENSMUSG00000004264.16	165.86078721555	1.05006095487414	0.273466174329652	3.83982025363156	0.000123124422592309	0.0015286616623149
ENSMUSG00000004266.14	154.821641019471	2.49503809278115	0.298119825004537	8.36924579820607	5.79881782801818e-17	7.55954978670734e-15
ENSMUSG00000004267.15	4.88315048975344	1.84867700819241	1.09344373198565	1.69069240063711	0.09089556647305	NA
ENSMUSG00000004268.10	223.119155355801	-0.18011892761951	0.263226249033181	-0.684274187247964	0.493802043522786	0.71358293289722
ENSMUSG00000004270.12	44.7045377806374	0.429147529366343	0.40438145069141	1.06124434894971	0.288578869461052	0.536367703367361
ENSMUSG00000004285.11	104.980996718637	0.148860356381075	0.34958522895949	0.425819926156906	0.67023906610143	0.833102705104985
ENSMUSG00000004296.13	0	NA	NA	NA	NA	NA
ENSMUSG00000004317.13	14.7777935356267	0.638142530513041	0.649883671570573	0.981933472756505	0.32613262402529	0.577138029023775
ENSMUSG00000004319.14	111.374968416458	0.0968026057973917	0.302896170927541	0.319590061178254	0.749279109582866	0.877847442610665
ENSMUSG00000004328.14	2.13771571104603	-0.211648176628604	1.87232882980828	-0.113040067139422	0.909998789790035	NA
ENSMUSG00000004341.7	0	NA	NA	NA	NA	NA
ENSMUSG00000004344.10	0	NA	NA	NA	NA	NA
ENSMUSG00000004347.15	0.0626653341129435	1.93703867970293	4.04540729808436	0.47882414228604	0.632063740172013	NA
ENSMUSG00000004356.7	240.419767597165	1.11722578480649	0.268166875823625	4.16615878219536	3.09774982041014e-05	0.000485483414477392
ENSMUSG00000004359.15	8.67224047231888	0.0259180826861396	0.918383700001251	0.0282214097289665	0.977485561529287	NA
ENSMUSG00000004360.8	1.04944137859037	1.07926893107188	2.40635931763008	0.448506971990702	0.653787355610894	NA
ENSMUSG00000004364.13	334.771147120364	-0.261854895108422	0.240278261943662	-1.08979852355441	0.275801904492643	0.520463331251542
ENSMUSG00000004366.3	0	NA	NA	NA	NA	NA
ENSMUSG00000004371.13	0.465283593606168	-0.248729939357501	3.03498679411317	-0.0819542081171332	0.934683127531965	NA
ENSMUSG00000004383.16	5.22173076177193	-0.380070281443928	1.09448577610896	-0.34725922414006	0.728396581318795	NA
ENSMUSG00000004393.9	140.310804571245	0.747430655427863	0.285946425205674	2.6138835444096	0.00895195435796245	0.0505729581719691
ENSMUSG00000004394.11	36.9114385071035	-1.14685985799288	0.456621316455113	-2.51162137347484	0.0120177951394849	0.0630887106992393
ENSMUSG00000004415.14	0	NA	NA	NA	NA	NA
ENSMUSG00000004446.11	27.4081592232513	1.33270031001123	0.493797861863045	2.69887825148351	0.00695736237801821	0.0416035892784936
ENSMUSG00000004451.13	12.5274898079147	0.054080622233741	0.711131249768416	0.0760487213174117	0.939380336390436	0.975314156426127
ENSMUSG00000004455.15	589.447951397406	-0.283229674893223	0.218957768512549	-1.29353562934667	0.19582586948608	0.422283260874505
ENSMUSG00000004460.15	89.8410978817072	-0.0157954678490667	0.326845989750964	-0.0483269440175842	0.9614556814156	0.983406662421648
ENSMUSG00000004462.6	16.024734881951	0.39218440093374	0.64662335790687	0.606511342558436	0.544175252719699	0.752174186853576
ENSMUSG00000004473.9	4.05137013257651	-0.406549332285107	1.20398528710825	-0.337669684703178	0.735612122348632	NA
ENSMUSG00000004500.8	11.9351446955131	-1.41651546111979	0.761557423176039	-1.86002449455785	0.0628820605311292	0.203772910864448
ENSMUSG00000004508.5	1.42623066841466	1.0077667079123	1.95495524931978	0.515493491865323	0.606208216255727	NA
ENSMUSG00000004530.11	115.837557315893	-0.606580118979295	0.312038859883547	-1.94392493039383	0.0519045043999556	0.179568297489834
ENSMUSG00000004535.11	533.251249816047	-1.20793603929447	0.258693932318977	-4.66936363163343	3.02134175988248e-06	6.53156394523337e-05
ENSMUSG00000004540.7	0.144048548896892	2.04666396042304	4.05459644924663	0.504776242479896	0.613716004026025	NA
ENSMUSG00000004542.14	0.0626653341129435	1.93703867970293	4.04540729808436	0.47882414228604	0.632063740172013	NA
ENSMUSG00000004552.15	36.2111310860971	-0.225295302512054	0.444623700808352	-0.50671006089521	0.612358270254293	0.798356006398747
ENSMUSG00000004558.13	9.82997806006154	-0.436043456664131	0.801846787044445	-0.543798969715098	0.586579817892526	0.781017139143809
ENSMUSG00000004561.13	27.7652060216372	-0.718155511292271	0.543496775274109	-1.3213611266232	0.186380981226522	0.409210075346224
ENSMUSG00000004562.15	2.97957486389095	-0.476238315135372	1.33729757953438	-0.356119926053548	0.721750755333304	NA
ENSMUSG00000004565.13	29.3952049858428	0.239233625412208	0.495849252287571	0.482472494026196	0.6294703335603	0.808232017602271
ENSMUSG00000004567.14	17.50879544033	0.599368197975558	0.604112140118352	0.992147249115264	0.321125700644665	0.571062261599498
ENSMUSG00000004568.11	319.579050119503	0.119405087146331	0.263599859943837	0.452978568242684	0.650564174129996	0.820741078330569
ENSMUSG00000004591.15	328.808759485753	-0.763542236738252	0.245108135364639	-3.11512400680767	0.00183867593190799	0.0145004287058995
ENSMUSG00000004609.10	0.275916606623393	1.8465013226266	4.0061731339656	0.460914009674563	0.644860300094519	NA
ENSMUSG00000004610.3	6.9367792314036	0.346701642227168	0.908251791588304	0.381724149005943	0.702665985773247	NA
ENSMUSG00000004612.8	2.27456214044435	-0.178084268154902	1.48278748249012	-0.120101005881056	0.90440313558235	NA
ENSMUSG00000004613.6	0	NA	NA	NA	NA	NA
ENSMUSG00000004626.13	108.831259058222	0.486603542445735	0.301615388356346	1.61332465527533	0.106673992733748	0.289716866629156
ENSMUSG00000004630.17	0	NA	NA	NA	NA	NA
ENSMUSG00000004631.14	0.198766383644657	1.1656308671802	4.02277772299595	0.289757711572515	0.77200160182017	NA
ENSMUSG00000004633.16	7.37472308756923	-1.34748246802732	0.924275837960982	-1.45787914460684	0.144873858073804	NA
ENSMUSG00000004637.14	6.68652129997642	-0.163364009554947	0.957625174618156	-0.170592851864078	0.864543918919834	NA
ENSMUSG00000004642.12	110.981289967316	-0.973717535330755	0.314586094350461	-3.09523387338919	0.00196657763859643	0.0153126099569988
ENSMUSG00000004651.5	10.5220056962631	0.0388139248261965	0.811107430154012	0.0478530011971739	0.961833396058534	0.983438397703696
ENSMUSG00000004654.5	0	NA	NA	NA	NA	NA
ENSMUSG00000004655.5	2.49553616843148	-1.34160549331334	1.5081965671263	-0.889542863679641	0.373711397548857	NA
ENSMUSG00000004661.14	64.9065237482412	1.11401907150221	0.361335015712112	3.08306425632933	0.00204880911141651	0.0158524762541616
ENSMUSG00000004665.9	257.399443427459	-0.0674341046886884	0.258287619213965	-0.261081444375489	0.794029700804332	0.903630652589302
ENSMUSG00000004667.17	125.960265511815	-0.966184314382376	0.2991069056475	-3.23023071731092	0.00123690360051285	0.0104132275722236
ENSMUSG00000004668.13	0.288097097793785	2.56009459768791	4.02323148779407	0.636327938239418	0.524562698846668	NA
ENSMUSG00000004677.14	655.593981350969	0.187642138283827	0.262392576293106	0.715119844222348	0.474534992871485	0.69970003643746
ENSMUSG00000004698.9	2.29479674103336	0.623166245322172	1.47753312725411	0.421761268040252	0.673199279189656	NA
ENSMUSG00000004707.13	117.655001255812	0.466773556594218	0.301687800159196	1.5472072664122	0.121813274349695	0.313726404536262
ENSMUSG00000004709.13	0.637342809782505	1.10467264540466	2.73090468126778	0.404507946755517	0.685839235375973	NA
ENSMUSG00000004730.13	0.485453371573875	-0.0437991273164602	3.21774608105119	-0.0136117413286233	0.989139737113301	NA
ENSMUSG00000004748.5	0.571922078561736	-0.951311076710438	2.84046795877147	-0.334913503872752	0.737690335188539	NA
ENSMUSG00000004768.13	8.67713575956793	0.0612187979261167	0.822592751806928	0.0744217570500615	0.940674797183957	NA
ENSMUSG00000004771.11	73.9181015634382	-0.325941772504337	0.355957028624478	-0.915677304543954	0.359836172078469	0.608992620219361
ENSMUSG00000004788.10	49.5713373415413	0.123077377361146	0.402920257040712	0.305463364550346	0.760013268260275	0.884467796137571
ENSMUSG00000004789.9	179.703456052038	-0.163855105029525	0.272306682698033	-0.601730017809469	0.547353865269794	0.75423328904249
ENSMUSG00000004791.6	0	NA	NA	NA	NA	NA
ENSMUSG00000004798.13	113.703491375902	-0.330767242685948	0.311924158021618	-1.06040918659152	0.288958484651257	0.536744128225262
ENSMUSG00000004814.9	0	NA	NA	NA	NA	NA
ENSMUSG00000004815.11	89.3470180293465	-0.108680322390104	0.319226639830303	-0.340448787256216	0.73351858356357	0.868584749974053
ENSMUSG00000004821.1	0	NA	NA	NA	NA	NA
ENSMUSG00000004837.2	427.100112273947	1.71229220316885	0.232196352509606	7.37432860017908	1.65175328681955e-13	1.42116852797954e-11
ENSMUSG00000004842.17	0	NA	NA	NA	NA	NA
ENSMUSG00000004843.6	32.9953935481733	-0.745733457238001	0.478428622170578	-1.55871413765901	0.119064054112988	0.309781104284318
ENSMUSG00000004846.9	7.84449873580846	1.39728857870326	0.874056165443594	1.5986256192062	0.109903813711853	NA
ENSMUSG00000004849.13	5.27224321852754	0.380711157320088	1.07384220545516	0.354531750927708	0.722940413448011	NA
ENSMUSG00000004864.11	0	NA	NA	NA	NA	NA
ENSMUSG00000004865.14	568.270057003523	-0.184914286626771	0.217018458605545	-0.852067090582708	0.394176856213913	0.637067426046805
ENSMUSG00000004872.14	0.546666808390117	0.278848879405222	2.68589184369601	0.103819846677632	0.917312316208178	NA
ENSMUSG00000004880.10	439.839770900278	-0.589449790969696	0.226905337658298	-2.59777842624999	0.00938290176629165	0.0525247148973151
ENSMUSG00000004885.5	1.95110412117108	2.18425546082248	2.03207966940548	1.07488672501779	0.282425446050675	NA
ENSMUSG00000004891.15	0.203851875848568	-0.616926025872596	4.01852682374413	-0.153520444912147	0.877987868707277	NA
ENSMUSG00000004892.12	0	NA	NA	NA	NA	NA
ENSMUSG00000004894.9	0	NA	NA	NA	NA	NA
ENSMUSG00000004895.9	79.9573433230379	-0.0243676798926451	0.334721927104673	-0.0727997717491182	0.941965452594272	0.975979657019147
ENSMUSG00000004896.15	28.593705147044	-0.0770416981014923	0.488307015868584	-0.157773072263672	0.87463561808558	0.944110540771203
ENSMUSG00000004897.15	108.106752636753	0.364691439318737	0.306711631172082	1.18903687455571	0.234425156786556	0.472032307276276
ENSMUSG00000004902.7	0	NA	NA	NA	NA	NA
ENSMUSG00000004929.11	26.2307282715327	1.20444924296161	0.505874012731752	2.3809272914762	0.0172691201149912	0.0829926572927299
ENSMUSG00000004931.10	89.4655287704007	0.599848472257557	0.318817084692361	1.88148158006141	0.0599064386489301	0.197257940350323
ENSMUSG00000004933.16	39.0666330059928	-0.793749060148577	0.448368975321338	-1.77030326324365	0.0766766347593686	0.233118645042264
ENSMUSG00000004934.12	60.6576320127591	-0.167258297135646	0.368673855113648	-0.453675504285725	0.650062400251696	0.820379369770863
ENSMUSG00000004936.8	98.2182415779025	0.31483204830742	0.322035188426328	0.977632443975742	0.328256144980949	0.579109262131656
ENSMUSG00000004937.5	46.4271204544191	0.243194540652828	0.404889955101575	0.600643551633227	0.548077423848964	0.75470291961266
ENSMUSG00000004939.6	2.33842436431497	0.335532081889995	1.54042077893078	0.217818460046281	0.827570560844679	NA
ENSMUSG00000004945.14	21.4649801790659	-0.426941090528609	0.559766186006553	-0.76271325635881	0.445634422974846	0.677768886900134
ENSMUSG00000004947.14	47.6053796101218	0.53971330749581	0.409063593831459	1.31938729242716	0.187039667900077	0.409905578862013
ENSMUSG00000004948.11	0	NA	NA	NA	NA	NA
ENSMUSG00000004951.10	0.774895756610919	0.33728983364391	2.6537837231001	0.127097709850256	0.898863064038306	NA
ENSMUSG00000004952.12	2.34096767951794	0.215414195862959	1.4619949045686	0.147342644758753	0.882861574126488	NA
ENSMUSG00000004961.6	0.213251272510449	1.55031693787114	4.01748495654645	0.385892406478068	0.699576354640962	NA
ENSMUSG00000004980.15	270.483364073195	0.273090778951738	0.270414228697223	1.00989796382908	0.312544178315011	0.561300719934137
ENSMUSG00000004988.8	0	NA	NA	NA	NA	NA
ENSMUSG00000004994.11	20.0956196547769	-0.326848283226916	0.571103434361425	-0.5723101343146	0.567111885199233	0.767588051492858
ENSMUSG00000004996.8	48.0159977345226	-0.0733956185631588	0.410309180659753	-0.178878811449315	0.858032860447729	0.935798546240621
ENSMUSG00000005034.14	224.224607238569	-1.06452924025126	0.263583707376629	-4.03867617936709	5.37537120023409e-05	0.000760685753401547
ENSMUSG00000005043.12	23.8371660452594	-0.298578530849147	0.542407957201619	-0.550468566850619	0.581998030752974	0.778056691213659
ENSMUSG00000005045.15	0.939924796442082	1.86414415264148	2.31645407344209	0.804740389206808	0.420969507221076	NA
ENSMUSG00000005054.6	29.7041386616995	-0.12981281164792	0.504879086747654	-0.257116634567204	0.797088736598917	0.905605637091917
ENSMUSG00000005057.12	0.91749240821111	0.975402231964752	2.35684559707091	0.413859199421881	0.678977225903062	NA
ENSMUSG00000005069.11	192.721975854452	-0.615052221973845	0.268204439698133	-2.2932216284939	0.0218352485595518	0.0985162446808516
ENSMUSG00000005078.15	21.6919384147424	0.470155529693547	0.553632433926917	0.84921962819037	0.395759093264616	0.637807086828818
ENSMUSG00000005087.16	268.840776971176	-0.105827457603354	0.259755058431802	-0.407412499461059	0.683705048100786	0.840813151911578
ENSMUSG00000005089.14	0.95214707504461	0.766789739433789	2.14620520427489	0.357276991923452	0.720884452654994	NA
ENSMUSG00000005102.12	51.1672109837415	-0.0501553520215613	0.404738822077114	-0.123920289544168	0.901378388037279	0.95640148608617
ENSMUSG00000005103.11	672.557737869828	1.14844530890709	0.216550645194687	5.30335667148251	1.13692475593958e-07	3.44440161975499e-06
ENSMUSG00000005107.12	7.65232532268678	-0.278772656040101	0.88002651639605	-0.316777563909951	0.751412389533217	NA
ENSMUSG00000005124.8	3.23885058143873	-0.663697270780567	1.29368294924521	-0.51302930997722	0.607930818238127	NA
ENSMUSG00000005125.11	205.634820905251	1.18677637421513	0.270439199317468	4.38832971407364	1.14224518211257e-05	0.000203897874416941
ENSMUSG00000005131.3	0.115931271564006	0.29763893709183	4.04178928838603	0.0736403894055258	0.941296532270958	NA
ENSMUSG00000005142.9	165.483179764063	0.365340764568718	0.27019850039911	1.35211988234233	0.17633696789641	0.396175000608429
ENSMUSG00000005148.7	0.286686987929219	-0.0242087251067937	3.98779963350409	-0.0060706974601734	0.995156313974264	NA
ENSMUSG00000005150.15	7.74576938317064	0.850784608625979	0.895368037942173	0.950206588322429	0.342007291649262	NA
ENSMUSG00000005161.14	47.1113226998963	-0.858674866140213	0.413044587395878	-2.07889146194579	0.0376273276575779	0.144143155461175
ENSMUSG00000005198.14	504.239983452321	0.232059057600558	0.270814446572234	0.856893199523834	0.391503911464521	0.635150581357435
ENSMUSG00000005202.2	0	NA	NA	NA	NA	NA
ENSMUSG00000005204.11	157.505316388419	0.771040153889218	0.274337830814534	2.81054986692842	0.0049456924230408	0.0320910540028982
ENSMUSG00000005220.9	0.57619419558757	3.07848654989331	3.58793894891512	0.858009735874728	0.390887087451862	NA
ENSMUSG00000005225.14	10.3926488917524	-0.277094235209355	0.789757558764858	-0.350859871025124	0.725693478220567	0.864645550630503
ENSMUSG00000005232.10	0	NA	NA	NA	NA	NA
ENSMUSG00000005233.15	2.17857133670971	-0.613394516362681	1.62004495153924	-0.378628084226849	0.704964064056917	NA
ENSMUSG00000005237.12	0.206713883009836	2.79199501225836	4.01367463718946	0.695620663017525	0.486666422381175	NA
ENSMUSG00000005251.13	0.29177248013313	-1.05207933669738	3.99850667312578	-0.263118064493546	0.792459580921828	NA
ENSMUSG00000005262.11	67.7278777485161	-0.27369417002893	0.354432765802257	-0.772203352614492	0.439993996177839	0.674110766491962
ENSMUSG00000005267.12	12.9506631192852	-1.07687529839113	0.746130765204399	-1.44327958128911	0.148941729322794	0.356853761281018
ENSMUSG00000005268.19	13.4836992079261	-0.445640446470387	0.682574539170965	-0.652881730706875	0.513832527717481	0.730867096789751
ENSMUSG00000005299.6	95.0331936284318	0.396369338702349	0.326335072193532	1.21460845761403	0.224515461578894	0.459265457688666
ENSMUSG00000005312.13	237.34416397737	0.171433599931845	0.25419289751557	0.674423249458981	0.50004226570049	0.718779776987343
ENSMUSG00000005320.9	0.322645154573842	1.96519759487619	3.82986516486871	0.513124486183721	0.607864244200624	NA
ENSMUSG00000005338.12	0.432145646690677	2.87033869215548	4.00993114473108	0.715807476127618	0.474110235469719	NA
ENSMUSG00000005339.9	0.136101049531713	0.482435301901315	4.03120216577034	0.11967529338959	0.904740372691678	NA
ENSMUSG00000005354.14	28.2528948791868	1.34168728462774	0.527980908452875	2.54116628678723	0.0110483359493759	0.0593459234925431
ENSMUSG00000005355.8	0	NA	NA	NA	NA	NA
ENSMUSG00000005357.8	0	NA	NA	NA	NA	NA
ENSMUSG00000005360.13	0	NA	NA	NA	NA	NA
ENSMUSG00000005362.13	298.946963314226	-1.94082108414437	0.267000578487581	-7.26897707539853	3.62219860132418e-13	2.8856848857216e-11
ENSMUSG00000005364.10	15.8239593765202	0.406010262547806	0.646634201094176	0.627882443985783	0.530080952545316	0.742453057493563
ENSMUSG00000005370.3	104.145724198843	-0.520663266549735	0.321387971249836	-1.62004590440937	0.105222416450267	0.287603395868523
ENSMUSG00000005371.13	260.821381732412	0.505680424840361	0.256729110454406	1.96970426900679	0.0488722734475575	0.172876930535659
ENSMUSG00000005373.12	0.213251272510449	1.55031693787114	4.01748495654645	0.385892406478068	0.699576354640962	NA
ENSMUSG00000005374.12	49.6863002940365	1.11125578132176	0.408868222787352	2.71788248484088	0.00657011685732182	0.0396418551475434
ENSMUSG00000005378.16	40.1448945883524	0.827475956011904	0.424983635863675	1.94707721940931	0.0515254776724488	0.178627735690055
ENSMUSG00000005397.7	0.319889757466017	0.721653399356056	3.99286919826287	0.180735547177457	0.856575155626442	NA
ENSMUSG00000005410.5	96.349984732579	0.0389583797169775	0.318289582647125	0.122399166799528	0.902582898347839	0.957325352241716
ENSMUSG00000005413.7	4.63479037830689	2.45203583599029	1.1824787662212	2.07364047967319	0.0381127128068331	NA
ENSMUSG00000005417.16	164.059348149719	0.258444707057778	0.273082338713224	0.946398468226031	0.343945386390342	0.593538374213243
ENSMUSG00000005442.12	171.479625441942	1.08969678607796	0.289797444521381	3.76020150169944	0.000169776548386847	0.00200378247231884
ENSMUSG00000005447.11	2.51956428519489	0.202589297123734	1.42284851107233	0.142382899899197	0.88677756867401	NA
ENSMUSG00000005465.8	157.545190247836	0.624031814152521	0.278623537479663	2.23969525258816	0.0251107139897504	0.108080331749781
ENSMUSG00000005469.9	34.5702744771226	0.0907611571496592	0.452383182478343	0.200628937292566	0.840988729422804	0.927318598994464
ENSMUSG00000005470.8	6.15381808928698	-1.38539452255352	0.999705017386986	-1.38580331043516	0.16580697127199	NA
ENSMUSG00000005474.8	0.311942258100838	-1.6937963683542	3.98756422020354	-0.424769677632363	0.671004584217614	NA
ENSMUSG00000005481.16	213.769559592644	0.476155869046783	0.277106136428724	1.71831585970402	0.0857390181043175	0.250576940139113
ENSMUSG00000005483.9	174.775835360721	-0.384641411453058	0.289800265181322	-1.32726383536052	0.184421422474057	0.40727975332823
ENSMUSG00000005493.14	1.81156685450213	0.941370736201893	1.78870989028903	0.526284749311572	0.598690377596212	NA
ENSMUSG00000005501.13	46.879951093425	0.522986159636389	0.405153905252058	1.29083331755379	0.196761481990405	0.422811136624737
ENSMUSG00000005503.8	0.455884196944287	-1.7896509761749	3.32785097785858	-0.537779782833459	0.590729091087626	NA
ENSMUSG00000005505.11	38.7042706527671	-0.7216788431167	0.441381931887354	-1.63504391770364	0.102039841417089	0.281713889235727
ENSMUSG00000005506.15	390.336736028182	0.257839388364258	0.240399674086641	1.07254466689223	0.283475462749892	0.530035227002542
ENSMUSG00000005510.8	53.4841795470367	-0.254666263927091	0.386126034292861	-0.659541810987905	0.509547906333816	0.726872558746102
ENSMUSG00000005514.13	120.818607244941	0.0142760063423989	0.298119040727236	0.047886932372967	0.961806353899008	0.983438397703696
ENSMUSG00000005533.9	219.179430414662	1.25491415856239	0.360597652304771	3.48009519901632	0.000501235642893471	0.00492872168166335
ENSMUSG00000005534.9	138.266997275006	-0.326595664772886	0.303082214196084	-1.07758109673037	0.281220741890959	0.5275997682406
ENSMUSG00000005540.9	0.313326670564718	2.7540474608349	4.02835012603836	0.683666358351859	0.494185871468294	NA
ENSMUSG00000005547.13	0	NA	NA	NA	NA	NA
ENSMUSG00000005553.12	0	NA	NA	NA	NA	NA
ENSMUSG00000005566.12	499.114143886154	0.166309087855809	0.236519384517744	0.703152040560687	0.481961003626209	0.704379381402153
ENSMUSG00000005575.14	60.7100671268044	0.111145159230792	0.37259916099713	0.298296858568741	0.765476601716539	0.887565803616228
ENSMUSG00000005580.10	8.67224943192759	-0.519762003413011	0.864955586864558	-0.600911782415482	0.547898745102556	NA
ENSMUSG00000005583.15	3.93953903488493	-0.0525794128904112	1.2152483945932	-0.0432663915659907	0.965489181767544	NA
ENSMUSG00000005609.14	157.417658188025	-0.273159117649139	0.279598782945693	-0.976968192676987	0.328584899467364	0.579195049004777
ENSMUSG00000005610.15	171.571442288281	0.3037095724144	0.279293242045824	1.08742184447331	0.276850421501961	0.521344063603167
ENSMUSG00000005611.14	0.654650580588944	-1.23983881076951	2.65578020419014	-0.466845414697103	0.640610480971195	NA
ENSMUSG00000005615.13	33.0760042997934	-0.601711850991703	0.494510669980779	-1.2167823416532	0.223687040300338	0.458785052382385
ENSMUSG00000005621.11	311.550577917219	0.108618095404995	0.251871149835662	0.431244687912313	0.666290463835033	0.83023362068597
ENSMUSG00000005625.14	222.653327952138	0.0319812206509877	0.250837042933206	0.127497997413021	0.898546258080887	0.9550453371869
ENSMUSG00000005628.11	2.19892914786227	0.336344903951402	1.8487487288654	0.181931107618838	0.855636791521777	NA
ENSMUSG00000005640.10	0.589268974588796	2.18287534953052	2.95363261762336	0.739047685384437	0.459878041995354	NA
ENSMUSG00000005649.16	0.269379217122779	3.08361466808462	4.00474292639203	0.769990664759779	0.441305430271774	NA
ENSMUSG00000005656.8	77.5017321820382	0.0604129301184015	0.337024447326561	0.179253851160133	0.857738381303785	0.935709292013101
ENSMUSG00000005667.7	275.379247754273	2.90656697831768	0.265276447669734	10.9567472116345	6.1676504444959e-28	2.12265857697771e-25
ENSMUSG00000005672.11	34.4892629123511	0.376468883415734	0.512151967176866	0.735072610363956	0.462295274123421	0.690940625266816
ENSMUSG00000005674.8	42.3667346910014	0.107842995585628	0.448226173405838	0.240599505303728	0.809865533632354	0.912061427007349
ENSMUSG00000005677.13	0	NA	NA	NA	NA	NA
ENSMUSG00000005681.11	0.224021653816275	-1.22679238043995	4.01216551260656	-0.305768138573861	0.759781189048016	NA
ENSMUSG00000005682.8	87.9991336813369	0.637603733641207	0.323685348287962	1.9698257490295	0.0488583444700792	0.172876930535659
ENSMUSG00000005683.7	166.206467215293	-0.0531092061896953	0.287114731820422	-0.184975552640443	0.853248210827856	0.932589888968861
ENSMUSG00000005686.15	2.65410682737646	0.00453121977457604	1.40810419660956	0.00321795772321846	0.997432445646607	NA
ENSMUSG00000005687.13	70.3158643841254	-0.953080821990678	0.360467653270101	-2.64401205862576	0.00819297373086816	0.0471205521259289
ENSMUSG00000005696.10	51.2851334920324	-1.08455055330396	0.400951758952438	-2.70494025549994	0.00683166752009305	0.0410472537310618
ENSMUSG00000005698.14	209.456743836152	-0.364978253170934	0.270060003638541	-1.35147096294731	0.176544615356803	0.396396104000504
ENSMUSG00000005699.14	4.40178576060728	0.143259056693029	1.14249343208976	0.125391580090741	0.900213553619798	NA
ENSMUSG00000005705.9	1.06246094233952	-1.11563250358899	2.05930499046033	-0.541751954546376	0.587989393455523	NA
ENSMUSG00000005716.15	0	NA	NA	NA	NA	NA
ENSMUSG00000005718.7	9.62762797233871	0.696678763104669	0.805914175908616	0.864457759809484	0.387336474919698	0.630943398373548
ENSMUSG00000005732.13	96.734259896017	0.607834093003684	0.321435242371385	1.89100015455491	0.0586243235971076	0.194872788712178
ENSMUSG00000005763.14	624.097594093279	-0.316293431149413	0.219749748968176	-1.43933466424673	0.150055726001861	0.358135774346743
ENSMUSG00000005774.11	62.2296227903701	0.975916447113633	0.35781177576745	2.72745759979655	0.00638244595948982	0.0388088798837105
ENSMUSG00000005779.11	288.933501859974	-0.0181930386651731	0.246433549797152	-0.073825332143892	0.941149369886484	0.97580012597721
ENSMUSG00000005800.2	0	NA	NA	NA	NA	NA
ENSMUSG00000005802.11	131.979434089506	0.879630074363735	0.301435775280298	2.91813429758225	0.00352132653853361	0.0247326477857495
ENSMUSG00000005803.13	12.6523007240745	-0.679947114968138	0.744520189910196	-0.913268873272803	0.361101148778849	0.609557442435396
ENSMUSG00000005804.13	34.2690913319036	-0.144163933237886	0.458239607652398	-0.314603824790376	0.753062474768209	0.879271208156557
ENSMUSG00000005813.11	139.728007549688	0.387288438211309	0.279369816086449	1.38629306356942	0.165657434052036	0.380693526331121
ENSMUSG00000005823.8	47.4341954124592	0.174013081201231	0.393854811394557	0.441820376867016	0.658619191996866	0.825110208300315
ENSMUSG00000005824.6	32.4416628859133	3.10109030516184	0.528350664294893	5.8693790217911	4.3743040144058e-09	1.76697238215716e-07
ENSMUSG00000005836.8	0	NA	NA	NA	NA	NA
ENSMUSG00000005846.11	228.492636486434	0.532550525584963	0.258977332719339	2.0563596048852	0.0397478669248897	0.149602207796042
ENSMUSG00000005864.7	0	NA	NA	NA	NA	NA
ENSMUSG00000005871.13	195.00917026471	-0.240276744657377	0.30700800628151	-0.782639995508963	0.433838547883742	0.669880665470727
ENSMUSG00000005873.5	62.3717956082331	-0.374863556208074	0.361866330102484	-1.03591720208373	0.300240771637902	0.548348885411273
ENSMUSG00000005881.12	33.01773135978	-0.3018816364964	0.471854367402854	-0.63977713750536	0.522317498092049	0.73744991033541
ENSMUSG00000005882.17	34.9849582592149	-0.439850912368012	0.455956068722985	-0.964678271746487	0.334705981608003	0.584825708559441
ENSMUSG00000005883.14	0.974540338054961	-0.956329274127451	2.12783545803725	-0.449437605955484	0.653116008305446	NA
ENSMUSG00000005886.13	425.210488583959	0.420945691612411	0.25052500292114	1.68025421296938	0.0929078654591708	0.264695123977055
ENSMUSG00000005891.6	0	NA	NA	NA	NA	NA
ENSMUSG00000005892.4	0	NA	NA	NA	NA	NA
ENSMUSG00000005893.13	157.525502666224	-0.164271413556099	0.277629738616595	-0.591692425943449	0.554056569319175	0.758851117864085
ENSMUSG00000005897.13	15.2533016525118	-0.0649571637101531	0.638766954304099	-0.101691490570173	0.919001556671788	0.967228060379702
ENSMUSG00000005899.11	61.2469324295114	-0.122674848981449	0.380404407232966	-0.322485351507301	0.747085033317787	0.877052752990345
ENSMUSG00000005907.13	19.3124878524173	-0.331248645952262	0.600226008021993	-0.551873196971039	0.581035233158718	0.777726687320723
ENSMUSG00000005917.14	0.0879206042845622	-0.000364418712234587	4.04679653155627	-9.00511575990808e-05	0.999928149571766	NA
ENSMUSG00000005936.17	110.053093903628	-0.834496094382238	0.310391337550262	-2.68852894210396	0.0071767614028036	0.0426148068390077
ENSMUSG00000005947.10	16.7595434128645	0.0565877661449536	0.618639751983576	0.0914712738124464	0.927118130702872	0.97078305909304
ENSMUSG00000005949.8	25.8567957333829	-1.09181221939797	0.534118120966892	-2.0441400067489	0.0409397178673039	0.152619294857142
ENSMUSG00000005950.13	0	NA	NA	NA	NA	NA
ENSMUSG00000005951.12	10.6358442319334	-1.41961558239962	0.797720141537151	-1.77959099749458	0.0751429205972192	0.230371974066157
ENSMUSG00000005952.14	0.144048548896892	2.04666396042304	4.05459644924663	0.504776242479896	0.613716004026025	NA
ENSMUSG00000005958.13	0.491948973642353	0.698703543025766	3.20470167652324	0.218024519456608	0.827410007173798	NA
ENSMUSG00000005968.13	14.6304418352199	0.137316279700265	0.646877994152935	0.212275391869029	0.831892192401781	0.922727913294434
ENSMUSG00000005973.6	30.0435546526189	1.08239194874463	0.473688835432404	2.28502735927177	0.022311223567876	0.0999821706135444
ENSMUSG00000005980.14	0	NA	NA	NA	NA	NA
ENSMUSG00000005981.11	106.576384705258	0.824861797130309	0.324626862020932	2.54095361053985	0.0110550586292801	0.0593459234925431
ENSMUSG00000005982.12	47.6760173745699	0.370068850006073	0.435729058733046	0.849309548190587	0.395709069215834	0.637807086828818
ENSMUSG00000005983.14	1.25130944507705	-0.232253404135052	2.24022943278663	-0.103673936578072	0.917428110771285	NA
ENSMUSG00000005986.14	6.22955743656486	-0.968318128919929	1.01078191950171	-0.957989166839553	0.338068221261818	NA
ENSMUSG00000005994.13	0.144048548896892	2.04666396042304	4.05459644924663	0.504776242479896	0.613716004026025	NA
ENSMUSG00000006005.16	968.229016036868	-0.461752135470942	0.245412456906543	-1.88153503408665	0.0598991741898693	0.197257940350323
ENSMUSG00000006007.13	0	NA	NA	NA	NA	NA
ENSMUSG00000006010.13	36.5944331795908	-0.87440374417511	0.462789350313676	-1.88942062643067	0.0588354892014881	0.195225819162979
ENSMUSG00000006014.15	3.23126279562769	-0.694034044296754	1.28703957512682	-0.539248409846579	0.589715461209095	NA
ENSMUSG00000006019.14	29.9157563477953	0.871433799735119	0.473369235477647	1.84091769051238	0.0656336215510786	0.209774026681085
ENSMUSG00000006021.5	21.3915690294413	0.414637612271726	0.554321751063591	0.748008916258744	0.454454779471654	0.684690702171917
ENSMUSG00000006024.11	190.64332788525	0.187025029615987	0.263087708464986	0.71088471106159	0.477155680996712	0.702210859456943
ENSMUSG00000006050.10	59.4845376634487	0.134978702862424	0.368600212615546	0.366192688562577	0.714221297549221	0.860060476722987
ENSMUSG00000006056.12	0.424198147325498	2.39576613167279	3.75678096629421	0.63771781031888	0.52365738966634	NA
ENSMUSG00000006057.14	84.9234341969887	0.6064572141485	0.328323693731393	1.84713203989674	0.0647280059163226	0.207728371094382
ENSMUSG00000006058.9	23.5227790205709	0.261839408527593	0.543370058447362	0.481880450453562	0.629890874483727	0.808410066237767
ENSMUSG00000006095.11	40.9082114700467	-0.163291434087167	0.422155377701613	-0.386804107473869	0.698901236154549	0.849871727213639
ENSMUSG00000006127.8	134.081187387418	-1.16872110475341	0.307093805096006	-3.80574627478412	0.000141377258288975	0.00171809312191856
ENSMUSG00000006134.3	122.154073378683	-0.0749439259195308	0.29848544596222	-0.251080670543034	0.801751739991577	0.907786810223389
ENSMUSG00000006143.11	0.144048548896892	2.04666396042304	4.05459644924663	0.504776242479896	0.613716004026025	NA
ENSMUSG00000006154.12	45.1007386808402	0.512287521575128	0.415300808475416	1.23353364867204	0.217376730736284	0.449531904952848
ENSMUSG00000006169.18	347.284849473114	0.214398308556645	0.254532910713033	0.84232057833324	0.39960853544373	0.641221918715033
ENSMUSG00000006179.7	0.490538863777787	-1.0255518236788	2.97352974927883	-0.344893749231037	0.730174250013511	NA
ENSMUSG00000006191.16	40.1164808823011	-0.272708864663656	0.435507908857088	-0.626185791618186	0.531193085548931	0.743272940000488
ENSMUSG00000006200.3	0	NA	NA	NA	NA	NA
ENSMUSG00000006204.5	0	NA	NA	NA	NA	NA
ENSMUSG00000006205.12	0	NA	NA	NA	NA	NA
ENSMUSG00000006215.11	156.95204691491	0.780493684556152	0.26928250300862	2.89841959962459	0.00375048454335317	0.0259816175612002
ENSMUSG00000006216.9	0.0626653341129435	1.93703867970293	4.04540729808436	0.47882414228604	0.632063740172013	NA
ENSMUSG00000006218.4	0	NA	NA	NA	NA	NA
ENSMUSG00000006219.11	0.33486743317637	0.925786728424274	3.99138058302347	0.231946492990901	0.816579572860366	NA
ENSMUSG00000006221.7	0	NA	NA	NA	NA	NA
ENSMUSG00000006235.5	0.272202099063426	0.365929574531883	3.98552948973845	0.0918145444599125	0.926845388066458	NA
ENSMUSG00000006241.14	0	NA	NA	NA	NA	NA
ENSMUSG00000006262.14	80.6303741513338	0.0881745276681343	0.357271216686115	0.246799975900665	0.805063029141822	0.909444539934324
ENSMUSG00000006269.6	0	NA	NA	NA	NA	NA
ENSMUSG00000006270.7	0	NA	NA	NA	NA	NA
ENSMUSG00000006273.13	121.514636244683	-0.251259440730321	0.30186464178219	-0.832357970933265	0.405206917880531	0.646827517893151
ENSMUSG00000006276.9	114.510128870403	0.140162999359758	0.311254889095671	0.450315815976389	0.652482736411018	0.821736402667979
ENSMUSG00000006281.7	60.4327896926282	0.531290066322488	0.374399835916698	1.41904460246798	0.155886012990779	0.365915379201241
ENSMUSG00000006288.7	108.188624767984	-0.599872318791391	0.308760013927922	-1.94284328193944	0.052035096587295	0.179947737555099
ENSMUSG00000006289.13	63.4827058029591	-0.508521110486001	0.379312070049443	-1.3406404663572	0.180037212180137	0.401722036721447
ENSMUSG00000006299.12	207.125806808253	0.123541791205275	0.261637732848317	0.472186445969925	0.6367937134226	0.812542356560589
ENSMUSG00000006301.16	13.0655336289964	-0.838766576404946	0.714937372668432	-1.17320286848949	0.24071446201742	0.479978500856984
ENSMUSG00000006304.13	555.023265852953	0.286350666426161	0.221564910094518	1.29240079714792	0.196218380799043	0.422283260874505
ENSMUSG00000006307.15	206.744374795732	0.879488019392789	0.312626302814713	2.81322464384593	0.00490473729627215	0.0318974752056882
ENSMUSG00000006310.10	3.02204447494096	1.65594897834521	1.42468530258609	1.16232614693177	0.245103009645216	NA
ENSMUSG00000006311.8	0.144048548896892	2.04666396042304	4.05459644924663	0.504776242479896	0.613716004026025	NA
ENSMUSG00000006313.4	0.650524198837174	0.507424092845927	2.85771825156364	0.17756267349599	0.859066440873665	NA
ENSMUSG00000006315.8	33.8619766034166	0.840432224776467	0.449579323092961	1.86937472790021	0.0615706980611038	0.201224554916989
ENSMUSG00000006333.13	2152.89685148859	-0.326895935067737	0.227052722812958	-1.43973580681095	0.149942158806284	0.358063373402517
ENSMUSG00000006335.15	14.5481804025994	-0.429985003057701	0.684386637305975	-0.628277905527637	0.529821902871626	0.742453057493563
ENSMUSG00000006342.13	4.47148127106539	-0.227407161409573	1.11901766724087	-0.20322034947874	0.838962808100841	NA
ENSMUSG00000006344.15	6.70752748831138	0.0437109500446326	0.949937658712808	0.0460145459480595	0.963298656200146	NA
ENSMUSG00000006345.9	2.4879065951883	-1.14394061229412	1.43722540156854	-0.795936817597062	0.426068760180208	NA
ENSMUSG00000006356.9	3.41554429040655	-0.856918973069438	1.25318807910035	-0.683791194123561	0.49410702794469	NA
ENSMUSG00000006360.10	120.68390615397	-0.372496151226213	0.336648761765944	-1.10648305751141	0.268517493257101	0.51374794573807
ENSMUSG00000006362.14	0.570551093917791	2.31908418865048	3.0137274132881	0.7695069495752	0.441592420538749	NA
ENSMUSG00000006369.13	0.683726968373972	1.87391278431703	2.81617459544333	0.665410726788421	0.505787825883183	NA
ENSMUSG00000006373.10	91.6202565360029	-0.935539265433116	0.343827278920167	-2.72095706998961	0.00650932143693463	0.039331679907137
ENSMUSG00000006378.12	3.83119554146887	-0.772572408723962	1.1969320810026	-0.645460524440805	0.518628792078241	NA
ENSMUSG00000006386.14	0.144048548896892	2.04666396042304	4.05459644924663	0.504776242479896	0.613716004026025	NA
ENSMUSG00000006389.11	0.288097097793785	2.56009459768791	4.02323148779407	0.636327938239418	0.524562698846668	NA
ENSMUSG00000006390.14	51.7018746937942	0.310735365302088	0.406758156407746	0.763931491986108	0.444908069350641	0.677640118373679
ENSMUSG00000006392.15	61.002942894756	0.416632821865109	0.367025258608485	1.13516116968272	0.256307795773081	0.498817524277673
ENSMUSG00000006395.15	11.9804463205211	0.285638064954231	0.734567745465892	0.38885190197545	0.697385704083371	0.848939812950385
ENSMUSG00000006398.14	9.65419257722314	-0.0816649063385686	0.780250226052197	-0.104665021055829	0.916641618620615	0.966044155635935
ENSMUSG00000006403.11	0	NA	NA	NA	NA	NA
ENSMUSG00000006411.11	0.0626653341129435	1.93703867970293	4.04540729808436	0.47882414228604	0.632063740172013	NA
ENSMUSG00000006412.9	14.2541224417594	0.790286387704879	0.682573951093585	1.15780332144044	0.246944307641241	0.487430333320771
ENSMUSG00000006418.16	193.337731541696	-0.0160711650420619	0.283845562012031	-0.0566193986904073	0.954848381411855	0.981140848844928
ENSMUSG00000006423.14	108.465053233764	-0.302038565322224	0.310524976982872	-0.972670759875407	0.330716962188837	0.581420943718825
ENSMUSG00000006435.14	0.144048548896892	2.04666396042304	4.05459644924663	0.504776242479896	0.613716004026025	NA
ENSMUSG00000006442.10	50.7866683683611	3.7015103611019	0.525567249562571	7.0428862608594	1.88297932816515e-12	1.4087960121333e-10
ENSMUSG00000006445.3	1.21216602072613	3.65590210096889	2.33389875371025	1.56643560272571	0.117246673505583	NA
ENSMUSG00000006456.10	59.239627706607	0.444642977331458	0.36614488533541	1.21439079211537	0.224598529903192	0.459265457688666
ENSMUSG00000006457.3	0.238506542682068	0.965207036957504	3.99090089402657	0.241851918297993	0.808894907822102	NA
ENSMUSG00000006463.12	7.11509652570051	0.198221844565218	0.926896321334238	0.213855465819396	0.830659769883409	NA
ENSMUSG00000006464.8	3.76687827007773	1.29904589835293	1.24570414445253	1.04282056388585	0.297031405412851	NA
ENSMUSG00000006469.12	0	NA	NA	NA	NA	NA
ENSMUSG00000006471.16	63.6164767645755	-0.016764003883876	0.363959957227192	-0.0460600226782956	0.96326240945083	0.9838449395673
ENSMUSG00000006476.18	25.5140070150704	0.496741815391593	0.514017603174916	0.966390668964221	0.333848731444691	0.584184357402912
ENSMUSG00000006488.15	0	NA	NA	NA	NA	NA
ENSMUSG00000006490.2	0	NA	NA	NA	NA	NA
ENSMUSG00000006494.10	170.091792001222	-1.16016919890429	0.310374810830431	-3.73796183975165	0.000185518095704631	0.00215421242336178
ENSMUSG00000006498.15	656.551927068152	0.0789089391074268	0.214148151473779	0.36847826406332	0.712516649552471	0.858963776679956
ENSMUSG00000006517.4	5.98111768878051	-1.16992540480731	1.01765065558053	-1.14963361777615	0.250294805842255	NA
ENSMUSG00000006519.10	128.766154898457	0.965096603100942	0.314697869178921	3.06674018994466	0.00216406865012126	0.0165507970361274
ENSMUSG00000006522.14	0	NA	NA	NA	NA	NA
ENSMUSG00000006526.10	14.7063048760764	-0.756342594495878	0.672764991562619	-1.12423001193795	0.260915460577908	0.504135778758662
ENSMUSG00000006527.13	93.5076445017026	-0.0550490429504357	0.326648430450298	-0.168526886458779	0.866168793815922	0.940406192362143
ENSMUSG00000006529.13	0	NA	NA	NA	NA	NA
ENSMUSG00000006538.10	0	NA	NA	NA	NA	NA
ENSMUSG00000006542.12	0	NA	NA	NA	NA	NA
ENSMUSG00000006546.3	0	NA	NA	NA	NA	NA
ENSMUSG00000006567.10	0.36659260801578	1.86325674049035	3.9479024705008	0.471961188102499	0.636954491919934	NA
ENSMUSG00000006570.3	0	NA	NA	NA	NA	NA
ENSMUSG00000006574.14	0.463912608962223	2.34848961934283	3.59353183009093	0.653532438387613	0.513413083979598	NA
ENSMUSG00000006575.13	3.94715251043356	-1.21831315898209	1.21605665759916	-1.00185558902114	0.316413344578892	NA
ENSMUSG00000006576.15	0.592024371696621	2.81712437276257	3.00020886002798	0.938976086063654	0.347743022483165	NA
ENSMUSG00000006585.2	62.9502661455791	0.541748943417268	0.369304282967459	1.46694465350948	0.142391111971024	0.345887387746667
ENSMUSG00000006586.14	0.136101049531713	0.482435301901315	4.03120216577034	0.11967529338959	0.904740372691678	NA
ENSMUSG00000006587.5	0.714560517594062	-1.63347829351967	2.56151602177887	-0.637699815121704	0.523669105922363	NA
ENSMUSG00000006589.7	48.6460252836741	0.592847240499842	0.459711802766849	1.28960630754246	0.197187384602735	0.423092333446865
ENSMUSG00000006599.12	161.84575458778	0.0204284207825855	0.273863461666648	0.0745934512704414	0.940538184737266	0.97572351502539
ENSMUSG00000006611.13	0.136101049531713	0.482435301901315	4.03120216577034	0.11967529338959	0.904740372691678	NA
ENSMUSG00000006641.11	29.8752485853771	2.20012577075871	0.579176070578063	3.79871662957832	0.000145447269939277	0.00175821243049395
ENSMUSG00000006642.3	0.0626653341129435	1.93703867970293	4.04540729808436	0.47882414228604	0.632063740172013	NA
ENSMUSG00000006649.15	1.17892412596871	1.0486857037723	2.13488009722553	0.491215270185504	0.623274199789394	NA
ENSMUSG00000006651.7	4.59450805207453	0.0866572378173564	1.12584486731575	0.0769708512541037	0.938646733485165	NA
ENSMUSG00000006673.13	428.357110873263	-0.0773829525031397	0.229279782776056	-0.337504474080569	0.735736639975704	0.869663147458574
ENSMUSG00000006675.9	7.21531867998615	1.22069773799758	0.921163090218259	1.32517004964708	0.185114756684628	NA
ENSMUSG00000006676.15	329.744130080398	-0.071292970586194	0.29000795337222	-0.245831087586383	0.805812990952797	0.90975134157694
ENSMUSG00000006678.6	26.47080163118	-0.660671242495744	0.536763906734055	-1.23084140756707	0.218382185281378	0.450698086390255
ENSMUSG00000006699.16	756.189327550916	-0.870307869099322	0.239211091292146	-3.63824212497081	0.000274505297237573	0.00294494211649885
ENSMUSG00000006705.11	192.211220061874	0.359355811586326	0.260237538745518	1.38087615383472	0.167317043120458	0.383687590354057
ENSMUSG00000006711.14	0.241261939789893	1.48793620930592	4.01349251054985	0.370733520841198	0.710836020694759	NA
ENSMUSG00000006715.10	8.95042142083525	-2.16106321490237	0.876001276655381	-2.46696354502293	0.0136264229578219	NA
ENSMUSG00000006717.6	4.62329221113825	-0.54113852551471	1.12691974895306	-0.480192601130152	0.631090447430008	NA
ENSMUSG00000006720.15	0.396080869992612	0.778547150575291	3.5630070779971	0.218508449052237	0.827032975974212	NA
ENSMUSG00000006724.11	3.10344111754485	5.49600124963342	1.76913976497206	3.10659528345417	0.0018925530598094	NA
ENSMUSG00000006728.11	97.1772434292412	0.847658295089109	0.319262308062225	2.65505283174203	0.00792959883406093	0.0460988299785542
ENSMUSG00000006731.9	583.293510240346	1.04114550566564	0.228507496974852	4.55628598382583	5.20660365051806e-06	0.000103938788420087
ENSMUSG00000006732.13	42.8610930293914	2.8564975067466	0.460824183607442	6.19867100807354	5.69419151662119e-10	2.73702926307311e-08
ENSMUSG00000006736.8	26.0158469249179	-0.425872270232531	0.537060815252167	-0.792968427667862	0.427796217761815	0.664876925148602
ENSMUSG00000006740.12	590.942848773163	0.184266380677679	0.218175290669648	0.844579512703329	0.398345651713428	0.639911498756971
ENSMUSG00000006763.11	21.3739821949493	0.144502868934255	0.554125448867339	0.260776452750233	0.794264904282419	0.903630652589302
ENSMUSG00000006764.8	0	NA	NA	NA	NA	NA
ENSMUSG00000006777.7	0	NA	NA	NA	NA	NA
ENSMUSG00000006782.15	187.383641177046	-0.461124525217143	0.278331350894897	-1.65674662137243	0.0975707129676256	0.27396931193034
ENSMUSG00000006784.13	0.231969153181455	1.11144759640798	4.0201330676362	0.276470350037816	0.782186829728365	NA
ENSMUSG00000006800.12	0.476053974911994	-1.98786773400459	3.27423780284746	-0.607123811311392	0.543768749122894	NA
ENSMUSG00000006818.4	89.1098616248633	0.105099407507753	0.320507105418574	0.3279159985252	0.742975176904476	0.874375382585982
ENSMUSG00000006850.7	32.2296633041729	-0.630189424658427	0.471003776411879	-1.33797106566582	0.180905869041881	0.401873677817655
ENSMUSG00000006906.9	5.87632918172321	0.175033443069123	1.00162202193222	0.174749994744991	0.861276082013874	NA
ENSMUSG00000006920.13	191.086086838921	-0.532733433637655	0.263813471531875	-2.01935644356694	0.0434501852160664	0.159150869986818
ENSMUSG00000006930.14	1.78603329390778	1.65509006721529	2.17065756008005	0.762483266662408	0.44577162645793	NA
ENSMUSG00000006931.14	0.350762431906728	3.18923975791783	3.99750764059862	0.797807044951701	0.42498247241864	NA
ENSMUSG00000006932.15	764.439304756582	-0.477889002010323	0.210124425510748	-2.27431437753475	0.0229470913259116	0.101560272246987
ENSMUSG00000006941.4	28.4876336792121	-0.10929251200642	0.4999873829327	-0.218590539955948	0.826969022623569	0.92035202052169
ENSMUSG00000006948.6	0	NA	NA	NA	NA	NA
ENSMUSG00000006958.12	0	NA	NA	NA	NA	NA
ENSMUSG00000006998.14	201.402974661102	0.260920736207778	0.273847513659993	0.95279570999405	0.34069358834626	0.590279426929363
ENSMUSG00000007021.4	0.206713883009836	2.79199501225836	4.01367463718946	0.695620663017525	0.486666422381175	NA
ENSMUSG00000007029.15	285.652980969865	1.86134627481645	0.260334327354577	7.14983034980738	8.68852124763282e-13	6.67464614416364e-11
ENSMUSG00000007030.7	2.88539873328466	1.75347919227026	1.40596499973855	1.24717129700692	0.212334694983307	NA
ENSMUSG00000007033.4	0	NA	NA	NA	NA	NA
ENSMUSG00000007034.14	0.144048548896892	2.04666396042304	4.05459644924663	0.504776242479896	0.613716004026025	NA
ENSMUSG00000007035.14	2.37043024409409	0.075902253507309	1.44979710574992	0.0523537074300117	0.958246859616241	NA
ENSMUSG00000007036.14	81.3305204731453	-0.182261340977424	0.331263628115242	-0.550200280104455	0.582182011481035	0.778172134034927
ENSMUSG00000007038.5	67.0354334239417	-0.113004460791821	0.353813445836446	-0.319389955700153	0.749430826489982	0.877847442610665
ENSMUSG00000007039.11	1.98864674026107	-0.241369001621193	1.61027784154804	-0.149892767194233	0.880849218190707	NA
ENSMUSG00000007041.9	245.786959178004	-0.135912460536863	0.247495507056139	-0.549151223605986	0.582901674710385	0.778743244521088
ENSMUSG00000007050.16	17.5075160243656	1.6612578608149	0.602162103872438	2.75882166966592	0.00580101817652442	0.0360635551956764
ENSMUSG00000007080.13	24.8002565832019	-0.48031228040176	0.531450787165104	-0.903775649602234	0.366114376123421	0.612202624893486
ENSMUSG00000007097.13	3.57294642686915	-0.140680711285912	1.26803199078928	-0.110944134144712	0.911660647616422	NA
ENSMUSG00000007107.6	0	NA	NA	NA	NA	NA
ENSMUSG00000007122.10	0	NA	NA	NA	NA	NA
ENSMUSG00000007207.9	21.3922767880596	-0.474308061774554	0.558640764061383	-0.849039476328723	0.395859326349212	0.637807086828818
ENSMUSG00000007209.3	0	NA	NA	NA	NA	NA
ENSMUSG00000007216.5	12.86184964053	-0.00725569091079122	0.69087637318252	-0.0105021552226021	0.991620646526848	0.996019617408009
ENSMUSG00000007279.13	0	NA	NA	NA	NA	NA
ENSMUSG00000007338.9	22.3582969407829	-0.852388628363056	0.554685912144429	-1.53670502477285	0.124365560086017	0.318314114585324
ENSMUSG00000007379.14	7.4554240964272	-1.05009968152058	0.912685439170742	-1.15056035349341	0.249913151417856	NA
ENSMUSG00000007411.14	205.984817890156	0.150747152407372	0.257553345455874	0.58530457890402	0.55834293656086	0.761843976252527
ENSMUSG00000007415.14	64.7784835956323	0.0714895321406722	0.369910551144186	0.193261673449284	0.846754040593883	0.930099804068654
ENSMUSG00000007440.10	0	NA	NA	NA	NA	NA
ENSMUSG00000007457.3	0	NA	NA	NA	NA	NA
ENSMUSG00000007458.13	517.752853254378	0.863179643982315	0.218935121565512	3.9426275592974	8.05937601708308e-05	0.00107508327520904
ENSMUSG00000007476.17	24.7431095345501	-0.652207533419463	0.550857548374424	-1.18398583325965	0.236418670772659	0.473893145137342
ENSMUSG00000007480.3	0.206713883009836	2.79199501225836	4.01367463718946	0.695620663017525	0.486666422381175	NA
ENSMUSG00000007564.13	333.129072818547	-0.102031804090186	0.237842286526509	-0.428989333983779	0.667930986790834	0.831042636620338
ENSMUSG00000007570.14	18.0415114159892	0.221726160770493	0.630055259736848	0.351915419074669	0.724901695226098	0.864645550630503
ENSMUSG00000007589.8	148.205306914581	-0.140264967998965	0.27927419013672	-0.502248231139074	0.615492919754613	0.80016956186106
ENSMUSG00000007591.13	1.25554243688227	-0.485560082011381	1.92444717831507	-0.252311462472308	0.80080032892158	NA
ENSMUSG00000007594.9	0	NA	NA	NA	NA	NA
ENSMUSG00000007603.8	56.8191084037307	0.436569665070389	0.372562793573695	1.17180156634195	0.241276733693119	0.480654090459735
ENSMUSG00000007610.14	26.423173616515	0.0183807350795465	0.500162825807403	0.0367495026242202	0.97068473789109	0.986099822326274
ENSMUSG00000007613.14	220.001077129167	0.243999625383633	0.256804453462255	0.950137827027585	0.342042224792687	0.591742720232811
ENSMUSG00000007617.16	37.4887865983607	-0.0375332295392961	0.456967848535934	-0.0821353836151661	0.934539056113869	0.973457141068106
ENSMUSG00000007646.12	2.62316590992974	1.63818435662443	1.46368935768351	1.11921586914937	0.263048057005671	NA
ENSMUSG00000007653.11	0	NA	NA	NA	NA	NA
ENSMUSG00000007655.15	0.144048548896892	2.04666396042304	4.05459644924663	0.504776242479896	0.613716004026025	NA
ENSMUSG00000007656.12	81.7272249816841	-0.231143027530922	0.336523366389721	-0.68685580442946	0.492173599721706	0.712149737496355
ENSMUSG00000007659.17	191.5994183594	3.06434831836719	0.288068106630567	10.637582737672	1.99230962435496e-26	6.34882666961113e-24
ENSMUSG00000007670.9	127.795402753444	1.09698869966851	0.303183653166047	3.6182316830509	0.000296622806699159	0.0031585923624252
ENSMUSG00000007682.5	0.376017702078347	1.4660852934764	3.90350687433783	0.375581583604895	0.707227984189549	NA
ENSMUSG00000007721.5	19.5785334494749	1.06895679809599	0.566485302243281	1.88699829256456	0.0591605553043182	0.195700660453039
ENSMUSG00000007739.9	497.995037370765	-0.115057594224167	0.224024997950517	-0.513592658304949	0.607536813596282	0.794976814879152
ENSMUSG00000007777.8	4.25002724395621	0.804304463572935	1.16786059203595	0.688699035704918	0.491012683148561	NA
ENSMUSG00000007783.9	0.623817031368853	1.34475827609677	2.70748211270751	0.496682238373868	0.61941314958173	NA
ENSMUSG00000007805.4	0	NA	NA	NA	NA	NA
ENSMUSG00000007812.15	150.009628147645	-0.380314946203509	0.279756490469401	-1.35944994722153	0.174004052978928	0.392741571833866
ENSMUSG00000007815.12	459.003499820125	-0.366068080164473	0.233070532961845	-1.57063218379648	0.116268109815942	0.305830271126985
ENSMUSG00000007817.13	67.17636007962	0.875970100910025	0.405840905941107	2.15840761265484	0.030896154376266	0.125220861499413
ENSMUSG00000007827.10	14.6228002200534	-0.234028183726756	0.672859109951505	-0.34781157045436	0.72798169961001	0.865633962545609
ENSMUSG00000007833.12	41.5233908725625	0.37051664302632	0.444316274622494	0.833902929486711	0.404335686312459	0.646276099764517
ENSMUSG00000007836.6	365.370858444724	0.21390085041115	0.232711828496893	0.919166214252002	0.358008639923445	0.607993497572586
ENSMUSG00000007837.9	0.968042073774968	2.35842023730693	2.31309800247028	1.01959373739817	0.307921176354522	NA
ENSMUSG00000007850.15	454.690863809124	-0.72577188931065	0.265433647445898	-2.73428744356376	0.00625154435745147	0.0381747960621096
ENSMUSG00000007867.8	0	NA	NA	NA	NA	NA
ENSMUSG00000007872.3	71.8457252494679	0.653359138965821	0.372598817737482	1.75351908772333	0.0795129460345892	0.238372608948294
ENSMUSG00000007877.2	1.40108200829648	1.88057130928091	2.00889313637892	0.936123119356507	0.349209800808534	NA
ENSMUSG00000007880.15	399.872534358943	0.861037269892489	0.301335687735091	2.857402242543	0.00427124180021942	0.0288269153735149
ENSMUSG00000007888.14	0.136101049531713	0.482435301901315	4.03120216577034	0.11967529338959	0.904740372691678	NA
ENSMUSG00000007891.14	244.723257861585	-1.55377878099273	0.294862045599724	-5.26951096005755	1.36787703631981e-07	4.04440344346928e-06
ENSMUSG00000007892.7	1842.64994769336	-0.41412271867193	0.237641250598199	-1.7426381894115	0.0813968347925107	0.242411472233494
ENSMUSG00000007907.4	0	NA	NA	NA	NA	NA
ENSMUSG00000007908.13	0	NA	NA	NA	NA	NA
ENSMUSG00000007944.7	0	NA	NA	NA	NA	NA
ENSMUSG00000007946.10	0	NA	NA	NA	NA	NA
ENSMUSG00000007950.8	51.4358705039032	-0.200181313312929	0.387221039949675	-0.516969102037806	0.605177727937415	0.794456170003137
ENSMUSG00000007987.11	1.04653758399696	2.09356047027545	2.25873516619181	0.926872924994191	0.353992516188876	NA
ENSMUSG00000007989.6	0.206713883009836	2.79199501225836	4.01367463718946	0.695620663017525	0.486666422381175	NA
ENSMUSG00000008028.14	0	NA	NA	NA	NA	NA
ENSMUSG00000008035.11	32.7504197968482	0.787748728618428	0.456931491790452	1.72399745426102	0.0847083027364721	0.248804340806287
ENSMUSG00000008036.10	78.0498758267159	0.192156069744734	0.336629951037755	0.570822855044119	0.5681197287139	0.768207157921483
ENSMUSG00000008090.13	10.455542142444	-0.00459466944990242	0.774694322537051	-0.00593094504017444	0.995267818264781	0.997456471996698
ENSMUSG00000008129.13	3.77711622883972	-0.0246084609188227	1.19189665415542	-0.0206464720183817	0.983527669045238	NA
ENSMUSG00000008136.13	10.5795023441677	0.493998204806235	0.856452641380346	0.576795704675576	0.564077471532494	0.765146234441995
ENSMUSG00000008140.16	97.512495342442	0.345991934924188	0.314708753208531	1.099403595854	0.271592063017711	0.515944731515492
ENSMUSG00000008153.10	2.05813016881433	-0.808537868054644	1.54918952011908	-0.521910236000367	0.601732831054551	NA
ENSMUSG00000008167.13	14.3837312616242	0.500039145764319	0.653848702474126	0.764762771375395	0.444412820030208	0.677245466443484
ENSMUSG00000008193.12	2.7054042873239	0.124577653899676	1.36695189281865	0.0911353607644502	0.927385035715075	NA
ENSMUSG00000008200.13	328.017278439718	0.0626542702182599	0.234647904952324	0.267013976668532	0.789458399840685	0.901579515825492
ENSMUSG00000008206.14	44.769324011215	-0.344743548277039	0.414070014898694	-0.832573081538838	0.405085545716505	0.646753764213176
ENSMUSG00000008226.13	2.62535026975176	-0.0745694481492326	1.400855296383	-0.0532313711071874	0.957547560511917	NA
ENSMUSG00000008301.10	65.863288122721	-0.528557175461102	0.374659276343245	-1.41076761963546	0.158313145117691	0.369841515230143
ENSMUSG00000008305.17	40.8144191168041	0.27510909903722	0.425950079995994	0.645871692381904	0.518362453585655	0.734573273567462
ENSMUSG00000008307.10	4.73179434950656	0.90073065080537	1.10743555049018	0.813348145096737	0.416018480802969	NA
ENSMUSG00000008318.8	23.8222641035548	0.112645943189876	0.519867696415875	0.216681944207135	0.828456220154846	0.920915788600463
ENSMUSG00000008333.11	54.8011920903966	-0.425755966810421	0.381850328562633	-1.11498127659876	0.264858445274231	0.509352271600242
ENSMUSG00000008348.9	542.783619017845	-0.494255604988688	0.259611910224642	-1.90382484594412	0.0569329995268858	0.19112427933255
ENSMUSG00000008373.15	103.511694038607	0.766228533202916	0.307104591236425	2.49500839475576	0.0125954150305161	0.0652051449594226
ENSMUSG00000008384.8	83.7801518565051	-0.20263242799963	0.338015334753262	-0.599477027122286	0.548854825031258	0.755092247292764
ENSMUSG00000008393.8	44.2923974933336	-1.24768576606078	0.433180414401434	-2.88029127028937	0.00397307932631603	0.0272168586971522
ENSMUSG00000008398.13	54.0882521648791	-0.392532821212679	0.413679582314666	-0.948881303293569	0.342680984717656	0.591934790706829
ENSMUSG00000008429.7	48.8699350947028	-0.192500516272088	0.401808659776389	-0.479085036094585	0.631878134689998	0.809759469139187
ENSMUSG00000008435.14	37.6363016399371	0.847576369015396	0.441843464715995	1.91827295569528	0.0550764097403314	0.187007667484535
ENSMUSG00000008438.3	0.883796851829752	1.30944959424165	2.34657920375742	0.558024886671168	0.576827390310765	NA
ENSMUSG00000008450.7	10.765526178171	0.702659282216933	0.760470915853487	0.923979165499484	0.355497163362523	0.605240374140524
ENSMUSG00000008461.5	0.198766383644657	1.1656308671802	4.02277772299595	0.289757711572515	0.77200160182017	NA
ENSMUSG00000008475.12	481.414799711842	0.250066009342863	0.220755248140305	1.13277492358383	0.257308784672737	0.499861093548031
ENSMUSG00000008482.8	0.198766383644657	1.1656308671802	4.02277772299595	0.289757711572515	0.77200160182017	NA
ENSMUSG00000008489.17	0	NA	NA	NA	NA	NA
ENSMUSG00000008496.17	27.0263596285558	1.42045628558857	0.53248437794962	2.66760180093577	0.0076394741367951	0.0447752285238318
ENSMUSG00000008540.10	0.144048548896892	2.04666396042304	4.05459644924663	0.504776242479896	0.613716004026025	NA
ENSMUSG00000008575.16	0.144048548896892	2.04666396042304	4.05459644924663	0.504776242479896	0.613716004026025	NA
ENSMUSG00000008590.4	0	NA	NA	NA	NA	NA
ENSMUSG00000008601.11	0.602794753002448	1.57934683355926	2.81689263783789	0.560669871597056	0.5750226096479	NA
ENSMUSG00000008604.10	86.2007889418076	0.767471871941747	0.325111015401883	2.36064555054538	0.0182431578171355	0.0862440273948536
ENSMUSG00000008658.14	0	NA	NA	NA	NA	NA
ENSMUSG00000008668.13	1310.99869604568	-0.498562748755484	0.217469796983533	-2.29256087820433	0.0218732988823077	0.0985845278069019
ENSMUSG00000008682.12	721.305592503988	-0.58224175090077	0.23163175907965	-2.51365250263699	0.0119488104544215	0.0629948315869136
ENSMUSG00000008683.15	3524.26679015217	-0.888621281625416	0.2231645012837	-3.98191144431053	6.83632525926321e-05	0.000933646706836518
ENSMUSG00000008690.14	224.338651386355	0.0153335203617098	0.253459176640293	0.0604970021798461	0.95175980339263	0.980007341837026
ENSMUSG00000008730.16	425.621589281787	-0.169627038597086	0.228460493314287	-0.742478649749454	0.45779738279147	0.688044239881147
ENSMUSG00000008734.8	9.5522265520405	-0.841093851234165	0.811768286465341	-1.03612553638492	0.300143580210174	NA
ENSMUSG00000008763.15	224.112803893624	-0.262537653128629	0.25507201313737	-1.0292687539469	0.303353401876972	0.551808175422721
ENSMUSG00000008789.9	0	NA	NA	NA	NA	NA
ENSMUSG00000008813.11	0	NA	NA	NA	NA	NA
ENSMUSG00000008822.14	8.37029242149094	0.685975685247594	0.836187943540986	0.820360650433093	0.412010540601754	NA
ENSMUSG00000008843.4	0.144048548896892	2.04666396042304	4.05459644924663	0.504776242479896	0.613716004026025	NA
ENSMUSG00000008845.8	0.957232567248521	0.31955934554067	2.12887211831126	0.150107346886652	0.88067992368549	NA
ENSMUSG00000008855.16	140.222314771674	-0.751658749340187	0.304014205999243	-2.47244613740866	0.0134191933564498	0.0687254402612462
ENSMUSG00000008859.7	63.6530044036053	-0.529741506874422	0.363157029757132	-1.45871197159173	0.144644399700776	0.350076066111245
ENSMUSG00000008874.3	0	NA	NA	NA	NA	NA
ENSMUSG00000008892.10	37.5271036882335	-0.838796824558585	0.447410429597213	-1.87478156312477	0.0608227806033895	0.199484896035056
ENSMUSG00000008932.9	1.59833167202313	-0.700492311395679	1.87909806998207	-0.372781135048668	0.709311344501026	NA
ENSMUSG00000008958.13	24.6030736384718	-0.438635595386976	0.532507538476159	-0.823717156459774	0.410100288782948	0.650070471789218
ENSMUSG00000008976.15	164.157465038747	0.219627150909914	0.270579398499457	0.811692065722272	0.416968348219125	0.656204542220629
ENSMUSG00000008999.7	5.31428585884798	-0.508462183938448	1.04267444040031	-0.487651911504836	0.625796419054747	NA
ENSMUSG00000009013.5	101.793314758891	-0.0461043350240707	0.375172322584024	-0.122888422862657	0.902195453354428	0.957150392190074
ENSMUSG00000009030.13	100.086691469866	-0.758778560689517	0.370340514910764	-2.04886727252175	0.0404750953449358	0.151412052325143
ENSMUSG00000009035.12	63.5239216540577	0.209391864864101	0.370275267733037	0.565503243427724	0.57173151880617	0.770584333258654
ENSMUSG00000009047.3	0	NA	NA	NA	NA	NA
ENSMUSG00000009070.13	0	NA	NA	NA	NA	NA
ENSMUSG00000009073.15	54.3625024672435	0.642325715966127	0.37698181895733	1.70386390978402	0.0884065148256946	0.256654552796996
ENSMUSG00000009075.2	0.206713883009836	2.79199501225836	4.01367463718946	0.695620663017525	0.486666422381175	NA
ENSMUSG00000009076.9	12.7127804220505	0.166096498261778	0.693111836941566	0.239638813549481	0.810610272473456	0.9121466145901
ENSMUSG00000009079.15	434.665616699574	0.256905452832529	0.224297560759386	1.14537782739476	0.252052679084113	0.493550580527926
ENSMUSG00000009090.16	199.501376815463	-0.285232997876393	0.279559658393126	-1.02029384180778	0.307589123066641	0.555946971107335
ENSMUSG00000009092.4	0.737485692669595	-0.857775954568556	2.52948355406743	-0.339111101627542	0.734526035546453	NA
ENSMUSG00000009093.7	0	NA	NA	NA	NA	NA
ENSMUSG00000009097.9	0	NA	NA	NA	NA	NA
ENSMUSG00000009108.14	0	NA	NA	NA	NA	NA
ENSMUSG00000009112.3	148.818777482555	-0.534831527460383	0.280786707292829	-1.90476085074289	0.0568111650081164	0.190789720425384
ENSMUSG00000009114.16	1.23597205581256	-0.643058654037364	1.90925978204667	-0.336810454022148	0.736259791903344	NA
ENSMUSG00000009115.5	0	NA	NA	NA	NA	NA
ENSMUSG00000009145.5	10.2443017826299	0.371642366833799	0.793234101661926	0.468515367727082	0.63941608381931	0.81390837554628
ENSMUSG00000009185.2	0	NA	NA	NA	NA	NA
ENSMUSG00000009207.14	64.3669277096914	-0.193253950892174	0.356711730791182	-0.541765056236137	0.587980366648399	0.782155701088872
ENSMUSG00000009210.9	0.259979820460898	1.22487005250833	4.04340119585505	0.302930625277541	0.761942731658975	NA
ENSMUSG00000009214.8	0	NA	NA	NA	NA	NA
ENSMUSG00000009216.7	0.144048548896892	2.04666396042304	4.05459644924663	0.504776242479896	0.613716004026025	NA
ENSMUSG00000009246.13	0	NA	NA	NA	NA	NA
ENSMUSG00000009248.5	0	NA	NA	NA	NA	NA
ENSMUSG00000009281.5	0	NA	NA	NA	NA	NA
ENSMUSG00000009291.11	141.239516326028	-1.0858718749853	0.290821201712094	-3.73381262642701	0.000188602829203262	0.00217234102070263
ENSMUSG00000009292.16	0.314697655208663	0.280942884341761	3.85217508317231	0.0729309749105178	0.941861045154241	NA
ENSMUSG00000009293.16	77.0188667743522	0.594864869343982	0.33740652274266	1.76305088742367	0.0778919074230323	0.235399357733674
ENSMUSG00000009350.12	3.50463583935357	0.483214076379749	1.28571553326637	0.375832805840138	0.707041197243052	NA
ENSMUSG00000009356.11	0	NA	NA	NA	NA	NA
ENSMUSG00000009376.14	0.144048548896892	2.04666396042304	4.05459644924663	0.504776242479896	0.613716004026025	NA
ENSMUSG00000009378.3	0	NA	NA	NA	NA	NA
ENSMUSG00000009394.12	0	NA	NA	NA	NA	NA
ENSMUSG00000009406.12	22.1160457792618	0.148906975348277	0.539110897865871	0.276208431210984	0.782387981870909	0.898513907637119
ENSMUSG00000009418.14	3.18510528496304	0.57967660625116	1.29057936957253	0.449159981879427	0.653316253361319	NA
ENSMUSG00000009470.15	690.440878231247	0.0185031604879845	0.216887009865198	0.0853124421766191	0.932013000169758	0.971839896836921
ENSMUSG00000009471.3	0	NA	NA	NA	NA	NA
ENSMUSG00000009487.9	0.125330668225887	2.27160461047965	4.03614422430032	0.562815520021077	0.573560510917365	NA
ENSMUSG00000009535.12	130.609902856316	0.228565589720567	0.296200723900015	0.77165776879641	0.440317149436018	0.674110766491962
ENSMUSG00000009545.13	0	NA	NA	NA	NA	NA
ENSMUSG00000009549.13	24.2513909936761	0.130732991450839	0.519338484770806	0.251729835713087	0.801249893884096	0.907457428850699
ENSMUSG00000009551.2	0.144048548896892	2.04666396042304	4.05459644924663	0.504776242479896	0.613716004026025	NA
ENSMUSG00000009555.15	104.450891121172	0.135772699880433	0.331712499338821	0.409308362365177	0.682313379450396	0.840197054560147
ENSMUSG00000009563.15	34.0155373388326	0.163964231813385	0.456465107159252	0.359204305524673	0.719442255939483	0.862008239813858
ENSMUSG00000009566.11	36.0176281998865	0.119944616338721	0.441489531461472	0.271681677120781	0.785866791092575	0.899835446645072
ENSMUSG00000009569.13	26.9877749578971	0.558923357144989	0.511337101035906	1.09306239663165	0.274366404725565	0.519394619638891
ENSMUSG00000009575.13	96.7103509549141	0.695465511713387	0.313183087706328	2.22063559308645	0.0263756530134245	0.111461747803293
ENSMUSG00000009580.14	0	NA	NA	NA	NA	NA
ENSMUSG00000009585.16	56.2462890279914	0.193434261958637	0.385926789444608	0.501220094715401	0.616216233570124	0.800452768988489
ENSMUSG00000009588.9	0	NA	NA	NA	NA	NA
ENSMUSG00000009596.8	0	NA	NA	NA	NA	NA
ENSMUSG00000009614.15	4.01604858401218	0.521427348737149	1.19302394196345	0.43706360819465	0.662065218543237	NA
ENSMUSG00000009621.17	21.3231606736418	0.282480186151042	0.564597421574097	0.500321424358418	0.616848770897915	0.800870201419294
ENSMUSG00000009628.13	8.27477010075985	0.353531823064022	0.900263414866444	0.392698200577737	0.694542399849314	NA
ENSMUSG00000009630.9	88.7908770448246	-0.633119606081525	0.328320724497024	-1.92835711803281	0.0538107217680028	0.183977863435161
ENSMUSG00000009633.3	2.45559545127082	-0.147608156634682	1.42985265161408	-0.10323312438387	0.917777950889185	NA
ENSMUSG00000009640.10	40.5220909438541	0.125663584475372	0.426520881249008	0.294624694827094	0.768280595360872	0.888949213603907
ENSMUSG00000009646.12	0	NA	NA	NA	NA	NA
ENSMUSG00000009647.12	35.7599805221916	1.3272114153757	0.463884323937017	2.86108270292811	0.00422196900704311	0.0286255487286043
ENSMUSG00000009654.4	0.269379217122779	3.08361466808462	4.00474292639203	0.769990664759779	0.441305430271774	NA
ENSMUSG00000009670.10	0	NA	NA	NA	NA	NA
ENSMUSG00000009681.9	50.603696286159	0.426762899934998	0.390924461539917	1.09167612140184	0.274975484409077	0.520089924786921
ENSMUSG00000009687.13	217.637755082882	-0.594737651243441	0.281763377882476	-2.11076987972336	0.0347920962504907	0.136006904197738
ENSMUSG00000009731.4	1.0797821409659	0.18592914351638	2.20738536419835	0.0842304866798388	0.932873179444377	NA
ENSMUSG00000009733.8	8.02963297868055	0.591016736433049	0.872009231816355	0.677764311281416	0.497921142707109	NA
ENSMUSG00000009734.16	0	NA	NA	NA	NA	NA
ENSMUSG00000009739.15	248.172998657044	-0.377643354725226	0.264874419851567	-1.42574490559282	0.153941989264025	0.363371932400148
ENSMUSG00000009741.13	335.217955307582	0.0726451729108045	0.252162015287293	0.288089277951076	0.773278399822577	0.891861575344967
ENSMUSG00000009772.14	6.58176962169853	0.0519935579934342	0.957497279130067	0.0543015203559355	0.956694938273567	NA
ENSMUSG00000009828.14	13.1849757877196	-0.919798248359406	0.709614277354993	-1.29619467605394	0.194908423303439	0.42114316275811
ENSMUSG00000009863.13	129.387188744413	0.0898865433574683	0.310464306760146	0.289522954491871	0.772181216549455	0.89107392532075
ENSMUSG00000009876.12	0.206713883009836	2.79199501225836	4.01367463718946	0.695620663017525	0.486666422381175	NA
ENSMUSG00000009894.14	14.2038723158448	0.398411545259965	0.648307260905813	0.614541235745696	0.538857732803823	0.748737045007052
ENSMUSG00000009900.7	0	NA	NA	NA	NA	NA
ENSMUSG00000009905.5	63.5785486845601	-0.755226732686271	0.385580763941761	-1.95867326203115	0.0501510636899495	0.175969003481052
ENSMUSG00000009907.16	230.376605502283	-0.14851747431687	0.255971362052087	-0.580211290537449	0.561772140665453	0.76334294034832
ENSMUSG00000009927.8	1026.05031698822	-0.54948219108624	0.232061981674928	-2.36782512637487	0.0178929909792744	0.0848216497992711
ENSMUSG00000009941.9	0.266517209961512	0.232169084205471	4.01818798402947	0.057779547678765	0.953924229545482	NA
ENSMUSG00000009995.16	62.9929858462599	0.0219435096632851	0.36951005392739	0.0593854197742534	0.952645125897944	0.980332336230823
ENSMUSG00000010021.12	0	NA	NA	NA	NA	NA
ENSMUSG00000010025.17	57.3233068910732	-0.24525614781569	0.37287202758212	-0.657748851277601	0.510699526117863	0.727975268839976
ENSMUSG00000010044.11	0.203851875848568	-0.616926025872596	4.01852682374413	-0.153520444912147	0.877987868707277	NA
ENSMUSG00000010045.2	72.9431679508264	-0.497232106002494	0.346650487080302	-1.43439032839815	0.151460906079129	0.360389832938282
ENSMUSG00000010047.11	8.84767559361474	0.48881564113393	0.807462152936326	0.605372820702938	0.544931305956009	NA
ENSMUSG00000010048.9	68.9069010267612	2.67617403751521	0.409074488397269	6.54202135166215	6.06928348399043e-11	3.55238878205807e-09
ENSMUSG00000010051.14	0.538719309024938	-0.990534184133054	2.86744669350284	-0.345441185141276	0.729762719264279	NA
ENSMUSG00000010054.4	58.9007712616029	0.0787016541815609	0.366217137525622	0.21490434531086	0.829841896976486	0.921522932574301
ENSMUSG00000010057.7	32.0240440194226	-0.785222805047268	0.488677317855401	-1.60683292708014	0.108091023067698	0.292365659375816
ENSMUSG00000010064.14	0.252032321095719	-0.5895802526008	4.01998613196457	-0.146662260327916	0.883398608308346	NA
ENSMUSG00000010066.14	0.388133370627432	-0.708742733137726	3.86180032416231	-0.183526509307926	0.854384920582977	NA
ENSMUSG00000010067.12	44.2290553388826	-0.347636390131876	0.433642755742765	-0.801665392833387	0.422746539630623	0.660848696762696
ENSMUSG00000010080.14	0	NA	NA	NA	NA	NA
ENSMUSG00000010086.16	0	NA	NA	NA	NA	NA
ENSMUSG00000010095.12	314.85885808665	1.51414684548322	0.238966254225732	6.33623709920537	2.35444384973847e-10	1.24206714096962e-08
ENSMUSG00000010097.12	411.515918544838	-0.312004510965078	0.232532309408012	-1.34176842675923	0.179671092478779	0.401376189285468
ENSMUSG00000010110.16	155.766501405434	-0.620336045249522	0.283619673362594	-2.18721091486644	0.0287271304537708	0.119003365412005
ENSMUSG00000010122.13	0.286686987929219	-0.0242087251067937	3.98779963350409	-0.0060706974601734	0.995156313974264	NA
ENSMUSG00000010136.13	0.6266399133095	-1.39436421099567	2.69216390946234	-0.517934367255574	0.604504062657159	NA
ENSMUSG00000010142.11	23.3385948539265	0.046015455197812	0.573857807554128	0.0801861621329804	0.936089195738861	0.973777226470458
ENSMUSG00000010154.6	0	NA	NA	NA	NA	NA
ENSMUSG00000010175.12	0.357299821407342	2.25238858870987	3.64849111706288	0.617347971104037	0.537005231873927	NA
ENSMUSG00000010205.10	193.789188003381	1.30196020372548	0.3442605592011	3.78190347086767	0.000155633716344398	0.00186052210539057
ENSMUSG00000010277.7	353.972822376716	-0.0784275699815144	0.236588706418056	-0.331493295554572	0.740271904365664	0.872854961591793
ENSMUSG00000010290.7	74.6937412319012	-0.02567934306709	0.348194701456027	-0.0737499535739861	0.941209349777413	0.97580012597721
ENSMUSG00000010307.5	2.74068480662928	-1.65192883211117	1.42103550083101	-1.16248245110353	0.245039548952727	NA
ENSMUSG00000010311.14	0.259979820460898	1.22487005250833	4.04340119585505	0.302930625277541	0.761942731658975	NA
ENSMUSG00000010342.15	3.1359496392323	0.706641420742622	1.34235638028764	0.526418640474004	0.598597367054105	NA
ENSMUSG00000010358.12	77.7092585722347	0.213358049343505	0.342756757435406	0.622476566005306	0.533628548135094	0.744380679013351
ENSMUSG00000010362.8	8.84955330340183	0.820278941823099	0.817251692361518	1.00370418255462	0.315521220455005	NA
ENSMUSG00000010376.13	32.0454546606087	-0.0821468747277549	0.467097244413502	-0.175866750896594	0.860398627118355	0.937858270282709
ENSMUSG00000010392.8	126.937554414831	-0.0295977606985409	0.295716591259361	-0.100088265499388	0.920274251325617	0.967417925422338
ENSMUSG00000010406.10	30.2585666049878	0.116455910037457	0.483345930507923	0.240936982577012	0.809603958347342	0.912061427007349
ENSMUSG00000010435.6	0	NA	NA	NA	NA	NA
ENSMUSG00000010453.11	275.685322877649	-0.0738406009123154	0.242243771450944	-0.304819399359742	0.760503705673513	0.884598334948615
ENSMUSG00000010461.13	0.144048548896892	2.04666396042304	4.05459644924663	0.504776242479896	0.613716004026025	NA
ENSMUSG00000010476.12	0.115931271564006	0.29763893709183	4.04178928838603	0.0736403894055258	0.941296532270958	NA
ENSMUSG00000010505.14	0	NA	NA	NA	NA	NA
ENSMUSG00000010517.7	124.943827554478	-0.0487917399417665	0.304144287804217	-0.16042300282547	0.872547870643269	0.943852386096893
ENSMUSG00000010529.5	0	NA	NA	NA	NA	NA
ENSMUSG00000010538.13	0.800190152003159	3.08049361099866	2.67828475144231	1.15017404678116	0.250072193358817	NA
ENSMUSG00000010554.13	114.04416184821	0.8546600996098	0.331817932583497	2.57568990607444	0.0100040320271404	0.0552823966355275
ENSMUSG00000010592.8	0.115931271564006	0.29763893709183	4.04178928838603	0.0736403894055258	0.941296532270958	NA
ENSMUSG00000010601.12	0	NA	NA	NA	NA	NA
ENSMUSG00000010607.8	1.27553811996371	0.72053604504109	2.07479905909726	0.347279917002947	0.728381036934687	NA
ENSMUSG00000010608.14	283.119920605187	0.187153893931358	0.276712264774131	0.676348386957567	0.498819478364176	0.717579466952913
ENSMUSG00000010609.14	74.9141886087002	-0.192068515473879	0.353304134571542	-0.543635063050716	0.586692626393087	0.781046473384824
ENSMUSG00000010651.4	0	NA	NA	NA	NA	NA
ENSMUSG00000010660.2	0.466693703470734	2.35253048274993	3.3010585027607	0.712659433567291	0.476056524662063	NA
ENSMUSG00000010663.4	21.9012787726639	-0.666085817807715	0.554915844844767	-1.20033663481721	0.230008627274978	0.465864931514574
ENSMUSG00000010721.14	5.71589412356635	-0.506983830329236	1.04290784849419	-0.486125242092336	0.626878371077516	NA
ENSMUSG00000010751.13	41.144009472355	-0.577741922093278	0.429814828468271	-1.34416470495486	0.1788951322231	0.40009316866722
ENSMUSG00000010755.15	314.116325278321	2.05952100992478	0.265410010661601	7.75977139969553	8.50826058662364e-15	8.51221791712904e-13
ENSMUSG00000010760.4	0.0879206042845622	-0.000364418712234587	4.04679653155627	-9.00511575990808e-05	0.999928149571766	NA
ENSMUSG00000010796.10	0	NA	NA	NA	NA	NA
ENSMUSG00000010797.6	0.144048548896892	2.04666396042304	4.05459644924663	0.504776242479896	0.613716004026025	NA
ENSMUSG00000010803.11	0	NA	NA	NA	NA	NA
ENSMUSG00000010825.16	0	NA	NA	NA	NA	NA
ENSMUSG00000010830.7	0	NA	NA	NA	NA	NA
ENSMUSG00000010841.12	0	NA	NA	NA	NA	NA
ENSMUSG00000010911.11	5.73984272123668	0.0912466112519779	1.00321802386969	0.0909539193684084	0.927529206239663	NA
ENSMUSG00000010914.9	27.2171768578049	-0.0373666342234135	0.506353920920743	-0.0737954870685445	0.941173118033458	0.97580012597721
ENSMUSG00000010936.10	106.647849468545	0.63226111782765	0.311176055195985	2.03184373370065	0.0421694781940292	0.156188631244695
ENSMUSG00000011008.12	3.470129059527	0.341560491125756	1.27030733751009	0.268880200121685	0.788021874073666	NA
ENSMUSG00000011034.6	0	NA	NA	NA	NA	NA
ENSMUSG00000011096.15	32.0435400949273	0.195012323431318	0.46853327275563	0.41621872932177	0.677249955797387	0.836927755621952
ENSMUSG00000011114.16	124.267634669263	-0.599284274534728	0.326632703028655	-1.83473445548455	0.0665450444271013	0.21127437721431
ENSMUSG00000011118.3	0	NA	NA	NA	NA	NA
ENSMUSG00000011148.12	2.23930807671284	0.0511879777326111	1.54603691123722	0.0331091562954004	0.973587541086523	NA
ENSMUSG00000011154.15	0.144048548896892	2.04666396042304	4.05459644924663	0.504776242479896	0.613716004026025	NA
ENSMUSG00000011158.7	108.585070130598	0.313050946568253	0.32852480136337	0.952898975264878	0.340641259344699	0.590279426929363
ENSMUSG00000011171.10	0.496223752879702	-1.55994604822704	3.4898419408526	-0.446996189129968	0.654877811438913	NA
ENSMUSG00000011179.7	2683.90213406928	0.102924441093482	0.203684892043492	0.505312102733201	0.613339643610602	0.798913509598069
ENSMUSG00000011254.15	22.5952665300843	0.472584069503524	0.56877238843788	0.830884338111886	0.406038972165709	0.647555016962698
ENSMUSG00000011256.15	87.3113876848345	1.92056769728582	0.354361866654228	5.41979224632496	5.96683347613773e-08	1.93730698976185e-06
ENSMUSG00000011257.18	47.040427050391	0.591244021319209	0.409927543899524	1.44231347738889	0.149213959830572	0.357048953739042
ENSMUSG00000011263.14	0	NA	NA	NA	NA	NA
ENSMUSG00000011267.7	0.782908078597406	3.7311626815752	2.91182057437343	1.2813848196598	0.200058533502896	NA
ENSMUSG00000011305.10	0.115931271564006	0.29763893709183	4.04178928838603	0.0736403894055258	0.941296532270958	NA
ENSMUSG00000011306.6	33.482425336266	0.37767975300479	0.4617217753221	0.817981245829955	0.41336789612452	0.652420706197786
ENSMUSG00000011349.5	0	NA	NA	NA	NA	NA
ENSMUSG00000011382.6	2.11561682848986	0.153011174729667	1.58980515864533	0.0962452372843274	0.923325803393398	NA
ENSMUSG00000011427.14	30.7987341333339	-0.793987270169644	0.514733707440977	-1.54252045026736	0.122947172330913	0.316055414023058
ENSMUSG00000011463.5	0.238506542682068	0.965207036957504	3.99090089402657	0.241851918297993	0.808894907822102	NA
ENSMUSG00000011486.13	0	NA	NA	NA	NA	NA
ENSMUSG00000011589.8	0	NA	NA	NA	NA	NA
ENSMUSG00000011632.6	0	NA	NA	NA	NA	NA
ENSMUSG00000011658.13	13.7787006167164	0.534059010897815	0.68656536477523	0.77787059804955	0.436645303105094	0.672107449878259
ENSMUSG00000011751.15	0.144048548896892	2.04666396042304	4.05459644924663	0.504776242479896	0.613716004026025	NA
ENSMUSG00000011752.6	163.959574308533	1.18774052690883	0.269441900885007	4.40815078503968	1.04256954354998e-05	0.000188847754793768
ENSMUSG00000011831.15	11.2684594018177	0.642012709182649	0.761805437682261	0.842751544457239	0.399367413058737	0.641074108574136
ENSMUSG00000011832.14	20.084821176643	0.273672339617943	0.558186443104538	0.4902884027348	0.623929832346501	0.805566068053615
ENSMUSG00000011837.3	22.4512746776591	-0.613545259487157	0.548389000897343	-1.11881394135039	0.263219522824211	0.507334402862794
ENSMUSG00000011877.12	113.419631267224	0.56247467901894	0.312149950223927	1.80193742980076	0.0715552504482838	0.221939933257763
ENSMUSG00000011884.12	67.529544612961	-0.251430483771187	0.360049993527125	-0.698321033998978	0.484976447824857	0.706884187207363
ENSMUSG00000011958.16	77.7673208681786	-0.481609863508902	0.349703152996531	-1.37719622880746	0.16845158748184	0.385775208595621
ENSMUSG00000011960.11	265.217932471313	-0.0647137852501587	0.259592666506684	-0.24928972809982	0.80313667635415	0.908778005791061
ENSMUSG00000012017.3	0	NA	NA	NA	NA	NA
ENSMUSG00000012042.7	0	NA	NA	NA	NA	NA
ENSMUSG00000012076.7	13.2723485623161	0.735193501016565	0.695161615722825	1.05758644376835	0.290244025528571	0.538308949689491
ENSMUSG00000012114.15	125.337206623294	0.833849287212704	0.346118278126712	2.40914548554248	0.0159899224330114	0.0786200609806528
ENSMUSG00000012117.12	23.4961232679411	0.518926422275566	0.536005966265755	0.968135533809114	0.332976685540986	0.583584408575251
ENSMUSG00000012123.14	3.08311356237971	-0.661179340180759	1.31168122606363	-0.504070140704054	0.61421208870668	NA
ENSMUSG00000012126.15	6.93699245151048	0.505327209737236	0.91305347359391	0.553447551925075	0.579956985196899	NA
ENSMUSG00000012187.12	1.11064138758667	-1.17535077366608	2.02834340014715	-0.57946340525022	0.56227653207039	NA
ENSMUSG00000012211.12	0.788035358233453	1.45919121904878	2.45169457176622	0.595176591673722	0.551725435683026	NA
ENSMUSG00000012282.2	0	NA	NA	NA	NA	NA
ENSMUSG00000012296.14	64.101258054421	0.623101957191586	0.361755426713363	1.72243983415155	0.0849898729838559	0.249319081879678
ENSMUSG00000012350.14	0.450798704740376	-0.0693149944035582	3.3174169450814	-0.0208942666993755	0.983330000138127	NA
ENSMUSG00000012396.11	1.05452687079428	0.391765765366239	2.23843272953132	0.175017886487152	0.861065579120167	NA
ENSMUSG00000012405.14	480.142977417694	-0.331993112695073	0.247881525003754	-1.33932172916092	0.180465957859879	0.401873677817655
ENSMUSG00000012422.13	186.617169838929	-0.0729140351258245	0.267322432231207	-0.272756889563092	0.785040100514275	0.899835446645072
ENSMUSG00000012428.9	0.288097097793785	2.56009459768791	4.02323148779407	0.636327938239418	0.524562698846668	NA
ENSMUSG00000012429.8	29.8730884333411	-0.0905281720362865	0.499900229366892	-0.181092479495234	0.856294987498513	0.934851170211548
ENSMUSG00000012443.3	22.1022960151328	-0.283352426901656	0.543275517628678	-0.521563033317698	0.601974607324709	0.793046933306048
ENSMUSG00000012483.4	12.6292575447827	-0.417087480286409	0.708688278999529	-0.588534469449982	0.556173604425524	0.760969492390057
ENSMUSG00000012519.13	0.958684464545223	0.213238327103935	2.11807738266817	0.100675418588964	0.919808125335886	NA
ENSMUSG00000012520.10	0	NA	NA	NA	NA	NA
ENSMUSG00000012535.13	277.747076100016	-0.000974060804369439	0.276104043011239	-0.00352787591860721	0.997185168110973	0.998432861983322
ENSMUSG00000012609.17	16.7138741104205	0.244654251861063	0.634307882550452	0.385702682548018	0.699716875900279	0.849973739975435
ENSMUSG00000012640.15	101.152269560641	-0.605039934591184	0.316430390795279	-1.912079092879	0.0558660500380423	0.188720649598475
ENSMUSG00000012705.15	3.14370242303902	0.251434544536504	1.53570133029862	0.163726200906273	0.869946690532103	NA
ENSMUSG00000012777.13	0	NA	NA	NA	NA	NA
ENSMUSG00000012819.14	2.42806263904367	3.50827859644937	1.76179056619085	1.99131421394462	0.0464463537626539	NA
ENSMUSG00000012848.13	2786.51450576364	-0.38091889013949	0.207163649499927	-1.83873421355045	0.0659542885429419	0.210486164177846
ENSMUSG00000012889.8	2.72100781550613	-2.37189374580043	1.55120034075603	-1.52906989734441	0.12624711698194	NA
ENSMUSG00000013033.15	86.0644513618308	0.490040158383238	0.333135953758179	1.47099150618535	0.141293413938238	0.343997887245218
ENSMUSG00000013076.14	0.385310488686785	2.26930788198874	3.55653994268422	0.638066187519331	0.523430595841233	NA
ENSMUSG00000013083.7	0	NA	NA	NA	NA	NA
ENSMUSG00000013089.14	5.76289754155482	0.763114700802276	1.02332137570632	0.745723405098965	0.45583451760369	NA
ENSMUSG00000013091.4	0	NA	NA	NA	NA	NA
ENSMUSG00000013150.14	17.6578695831665	-0.699880195251924	0.608840474323678	-1.14952967939488	0.25033763580406	0.491250936523358
ENSMUSG00000013155.9	1.01569060695694	-0.0780863760054328	2.37640892303129	-0.0328589811495185	0.973787043418716	NA
ENSMUSG00000013158.5	0	NA	NA	NA	NA	NA
ENSMUSG00000013160.7	87.653492203965	-1.10716640444436	0.352734509395929	-3.13880943018709	0.00169635729326918	0.0135645521852119
ENSMUSG00000013236.15	42.927288797359	0.561506341782374	0.409172522845534	1.37229728398538	0.169970910806593	0.387650178034115
ENSMUSG00000013275.9	286.712754694072	2.1748698567022	0.303792175076334	7.15907134920679	8.12254054635981e-13	6.29606656404323e-11
ENSMUSG00000013338.15	0	NA	NA	NA	NA	NA
ENSMUSG00000013353.9	0.538719309024938	-0.990534184133054	2.86744669350284	-0.345441185141276	0.729762719264279	NA
ENSMUSG00000013367.4	0.689344372643065	3.00593172580793	2.81092641173581	1.06937403741982	0.284901161268108	NA
ENSMUSG00000013415.8	0.115931271564006	0.29763893709183	4.04178928838603	0.0736403894055258	0.941296532270958	NA
ENSMUSG00000013418.8	0	NA	NA	NA	NA	NA
ENSMUSG00000013419.6	1.90666337040593	1.44035497902934	1.6467183672568	0.874682038938308	0.381746935563067	NA
ENSMUSG00000013465.17	164.608732201577	-0.0230783891137019	0.279039282975244	-0.0827065955288788	0.934084840369858	0.973138899643769
ENSMUSG00000013483.13	0	NA	NA	NA	NA	NA
ENSMUSG00000013495.14	22.5496420469342	0.199463320803058	0.54275855467954	0.367499174510158	0.713246707474709	0.859251564143433
ENSMUSG00000013523.12	0.144048548896892	2.04666396042304	4.05459644924663	0.504776242479896	0.613716004026025	NA
ENSMUSG00000013539.12	10.3777631419978	0.270137300068833	0.770671094552293	0.350522164355683	0.725946859205423	0.864645550630503
ENSMUSG00000013584.5	0	NA	NA	NA	NA	NA
ENSMUSG00000013593.11	138.423477537004	-0.257933089716546	0.302517490738916	-0.852622071823119	0.393868918568227	0.637067426046805
ENSMUSG00000013611.13	0	NA	NA	NA	NA	NA
ENSMUSG00000013622.14	26.2981171910862	-0.831028535421481	0.519081787916708	-1.6009587598069	0.109386053609305	0.295033732054691
ENSMUSG00000013629.15	132.23731076113	1.98455764443834	0.32025499655663	6.19680462686368	5.76209513713024e-10	2.75428147554825e-08
ENSMUSG00000013643.12	0	NA	NA	NA	NA	NA
ENSMUSG00000013646.16	66.3250354896378	-0.697841997650827	0.368252622251164	-1.89500890281473	0.0580912222123898	0.194080860887401
ENSMUSG00000013653.2	0	NA	NA	NA	NA	NA
ENSMUSG00000013662.5	160.962979095589	-0.127413598127396	0.273435595886101	-0.465972975151595	0.641234844774654	0.815307315566887
ENSMUSG00000013663.7	326.630745394159	-0.243208395394747	0.242961037359831	-1.00101809754191	0.316818059071302	0.566499281417097
ENSMUSG00000013668.9	0.0626653341129435	1.93703867970293	4.04540729808436	0.47882414228604	0.632063740172013	NA
ENSMUSG00000013698.11	77.2918865542887	-0.99267330921957	0.354538823833068	-2.79990015899348	0.00511184145510841	0.0325794695405576
ENSMUSG00000013701.11	44.9250000898627	0.580851913277174	0.420882550673786	1.38008076682508	0.167561778387169	0.384044097294406
ENSMUSG00000013707.3	104.076289281926	-1.41004683006507	0.320187063168211	-4.40382199115988	1.06360226555668e-05	0.000191448407800202
ENSMUSG00000013736.15	144.817254404143	-0.236160358069915	0.287606717252162	-0.821122539578443	0.411576472549978	0.65119375561849
ENSMUSG00000013766.10	0	NA	NA	NA	NA	NA
ENSMUSG00000013787.14	144.611805705884	-0.211868284052093	0.281717141385198	-0.752060321961029	0.4520147837372	0.682909670588391
ENSMUSG00000013822.6	40.3203418825038	0.0857958443302134	0.434837814557143	0.197305389407293	0.843588562109699	0.928366733769984
ENSMUSG00000013833.14	60.0993755856807	0.479276048236078	0.370244986502394	1.29448356009806	0.195498444260711	0.422029756419752
ENSMUSG00000013846.9	66.9049885909519	1.65363670646795	0.380420116226766	4.34686977878485	1.38094149091291e-05	0.000240518635380865
ENSMUSG00000013858.13	152.386831997979	1.07573789946745	0.288385185153357	3.73021207346485	0.000191318666367753	0.0021977380579815
ENSMUSG00000013878.16	33.9503281999062	0.112010410516726	0.451232680004646	0.248232044087703	0.803954874481635	0.908784790415528
ENSMUSG00000013921.13	1.79111878611169	0.337084129123538	2.19407279996233	0.153633976561455	0.87789834555168	NA
ENSMUSG00000013928.11	0	NA	NA	NA	NA	NA
ENSMUSG00000013936.11	0	NA	NA	NA	NA	NA
ENSMUSG00000013973.11	34.0381469050955	0.339799656558901	0.460713633618109	0.737550686074476	0.460787531705844	0.69057932813048
ENSMUSG00000013974.2	0.115931271564006	0.29763893709183	4.04178928838603	0.0736403894055258	0.941296532270958	NA
ENSMUSG00000013997.9	28.6936992675062	0.0963149325875977	0.482989031179374	0.199414326972216	0.841938654240337	0.927572876042265
ENSMUSG00000014030.14	2.58707594630964	2.58981969399955	1.69145674851208	1.53111789366044	0.125740258211974	NA
ENSMUSG00000014039.16	78.9684523581501	0.568846068901313	0.393157868539001	1.44686426095243	0.147934944492678	0.355242049236674
ENSMUSG00000014074.16	63.168728934708	-0.723054157450434	0.364426963958014	-1.98408523232583	0.0472463391233842	0.168675311957509
ENSMUSG00000014075.14	0.367963592659725	-0.964066152458705	3.96725260646067	-0.243005991322237	0.808000756146438	NA
ENSMUSG00000014077.12	200.84765340329	-0.70848310069528	0.288884223189144	-2.45248111120076	0.0141874827881327	0.0719519744824471
ENSMUSG00000014104.11	0	NA	NA	NA	NA	NA
ENSMUSG00000014158.10	1.03721909998784	2.33169171842851	2.32279407139414	1.00383057936299	0.315460282244943	NA
ENSMUSG00000014164.13	12.8418430737644	0.0269844540819012	0.719957036253982	0.0374806449872403	0.970101772365046	0.986099822326274
ENSMUSG00000014177.9	26.8306506098727	0.227106091394251	0.494364971402035	0.459389529056176	0.64595446619333	0.817092761758384
ENSMUSG00000014195.14	67.0157240914565	0.313083180347687	0.377259539257266	0.82988804196727	0.406602086433318	0.647972652652764
ENSMUSG00000014198.14	0.562603594552612	0.628511178107189	3.0313571484532	0.207336564887413	0.835747019872617	NA
ENSMUSG00000014226.9	95.8723213651785	0.348807263295987	0.373428035726652	0.934068227141126	0.3502687002043	0.600363526468049
ENSMUSG00000014232.13	14.8847539948124	0.154089716988576	0.650797886931762	0.236770462969762	0.812834867198134	0.913006683730123
ENSMUSG00000014243.5	5.49544958075337	-0.302560836372216	1.09993913712635	-0.2750705254135	0.783262055720992	NA
ENSMUSG00000014245.8	12.8805995908512	0.502999159199444	0.710461552947142	0.707989274173809	0.478951918248739	0.702827536613498
ENSMUSG00000014294.4	83.4665094648398	-0.336458898733342	0.360828320900602	-0.932462556967713	0.351097528481721	0.601106401210375
ENSMUSG00000014301.11	8.49678275829221	0.216894497210755	0.837543644878237	0.258965008614312	0.79566223881115	NA
ENSMUSG00000014303.12	0.609332142503061	0.601379885160463	2.56277789971271	0.234659384735556	0.814473113821403	NA
ENSMUSG00000014313.13	69.0200766411683	-0.507813575785536	0.361678072806438	-1.40404855579206	0.160304391101725	0.372571307682129
ENSMUSG00000014329.13	0.144048548896892	2.04666396042304	4.05459644924663	0.504776242479896	0.613716004026025	NA
ENSMUSG00000014349.7	196.364302461451	-0.0940034632583781	0.263832444214632	-0.356299861217617	0.721616013245779	0.862637246230679
ENSMUSG00000014351.11	0	NA	NA	NA	NA	NA
ENSMUSG00000014353.13	153.119514753916	-0.563731021149155	0.277750681912824	-2.02962965659285	0.0423941980322668	0.156483217174295
ENSMUSG00000014355.9	344.764685628666	0.0165565169751566	0.238238364535745	0.0694955953354545	0.944595138591891	0.976073304599019
ENSMUSG00000014361.5	1.73131545916002	2.95588058469574	2.28846111751138	1.29164553510534	0.196479927144651	NA
ENSMUSG00000014402.13	78.7122592594268	-0.607942934475442	0.347229241825246	-1.75084025550304	0.0799734303086352	0.239252918767558
ENSMUSG00000014418.14	80.1838398741636	-0.42693027341099	0.349322130933151	-1.22216783766469	0.22164416371577	0.455572476017793
ENSMUSG00000014426.8	61.9898164416202	-0.159960901594453	0.37470870403709	-0.426894010923803	0.669456527952373	0.832490817531756
ENSMUSG00000014444.15	192.873354822872	1.72449819491999	0.280947305114849	6.13815531782739	8.34852189887499e-10	3.82078097967662e-08
ENSMUSG00000014453.3	2.49003689799744	-0.778301959314128	1.47584244980768	-0.527361141709637	0.59794282268605	NA
ENSMUSG00000014470.4	68.9473895549944	-0.347836722781469	0.354231611022895	-0.98194715535703	0.326125882877213	0.577138029023775
ENSMUSG00000014496.7	145.707654697161	1.05218601253129	0.288175930958533	3.65119324515236	0.000261024738453175	0.00282853507512735
ENSMUSG00000014498.8	132.099927718992	0.916034473519352	0.351456901634927	2.60639204766812	0.00915016622052137	0.0514562288636378
ENSMUSG00000014503.13	0.213251272510449	1.55031693787114	4.01748495654645	0.385892406478068	0.699576354640962	NA
ENSMUSG00000014504.15	35.9277693894119	0.0310831770368487	0.472463998390045	0.0657895144238861	0.947545404428149	0.977656872490682
ENSMUSG00000014529.8	0.0626653341129435	1.93703867970293	4.04540729808436	0.47882414228604	0.632063740172013	NA
ENSMUSG00000014542.2	1.58726691026312	1.76984093297625	2.50820971920857	0.705619198993735	0.4804249815221	NA
ENSMUSG00000014543.13	0	NA	NA	NA	NA	NA
ENSMUSG00000014547.9	29.1099267498276	0.0486131049357216	0.486068714697737	0.100012824248423	0.920334144216309	0.967417925422338
ENSMUSG00000014550.13	108.928066552537	0.1130178548488	0.305794931743635	0.369587076556091	0.711690181764461	0.858578564764641
ENSMUSG00000014551.8	23.3555089970164	-0.086282431722868	0.557038041932828	-0.154895043475815	0.87690406122149	0.944787759456645
ENSMUSG00000014554.12	21.5706025789873	0.234872339676702	0.546086204567583	0.430101214262838	0.667122016785306	0.83066828255004
ENSMUSG00000014592.18	7.46404975361028	-0.118232923680501	0.887055464813725	-0.133286957096115	0.893966442292814	NA
ENSMUSG00000014599.9	6.35769391086937	1.38754863639158	0.951761688998941	1.45787401660493	0.144875271791186	NA
ENSMUSG00000014601.12	160.148842802804	-0.408902067181885	0.287539716919096	-1.42207160653544	0.155005464476816	0.364589124209546
ENSMUSG00000014602.14	0	NA	NA	NA	NA	NA
ENSMUSG00000014603.2	0	NA	NA	NA	NA	NA
ENSMUSG00000014606.13	48.4473076271007	-0.0892723691827659	0.393291712847357	-0.226987669118301	0.820433330552542	0.916992514428951
ENSMUSG00000014609.15	3.91891610577194	0.982202230434089	1.22288950076953	0.803181505619288	0.42186983347688	NA
ENSMUSG00000014633.14	3.88806595604175	1.19492023098984	1.21909021772142	0.980173750572162	0.327000359376976	NA
ENSMUSG00000014668.14	134.642130129539	0.0932944956146248	0.291898860550935	0.319612400810812	0.749262172617726	0.877847442610665
ENSMUSG00000014686.7	0.0626653341129435	1.93703867970293	4.04540729808436	0.47882414228604	0.632063740172013	NA
ENSMUSG00000014704.10	0	NA	NA	NA	NA	NA
ENSMUSG00000014725.13	0	NA	NA	NA	NA	NA
ENSMUSG00000014747.5	0	NA	NA	NA	NA	NA
ENSMUSG00000014748.12	80.1172440499016	-0.0843350376540588	0.339356848241935	-0.248514323759674	0.803736488872589	0.908784790415528
ENSMUSG00000014763.7	66.3745783312092	-0.094252736359361	0.3713954527826	-0.2537799955632	0.799665528837583	0.906856756309287
ENSMUSG00000014767.15	94.3460161513748	0.0933917430715504	0.33053334787485	0.282548625341462	0.777522867082657	0.894957424532332
ENSMUSG00000014769.9	254.764196023686	-0.702283011243836	0.277537754360613	-2.53040532399545	0.0113930827824654	0.0607725258898528
ENSMUSG00000014771.11	45.8461520858986	-0.515147914563364	0.432282143493036	-1.19169371744282	0.233381362387419	0.470463310173873
ENSMUSG00000014773.12	0.115931271564006	0.29763893709183	4.04178928838603	0.0736403894055258	0.941296532270958	NA
ENSMUSG00000014776.6	2.79430831356472	2.25642052478538	1.62623717455329	1.38751011235812	0.165286269730961	NA
ENSMUSG00000014778.9	22.2541802385	0.0112823703299192	0.582124322635514	0.0193813759212796	0.984536867480695	0.9915668041442
ENSMUSG00000014782.14	0.397532767289313	1.12998728204078	3.81140607746623	0.296475174535058	0.766867223073133	NA
ENSMUSG00000014786.7	3.00621429883191	2.03027267989912	1.50601152824614	1.34811230977994	0.177622262780161	NA
ENSMUSG00000014791.9	10.2682374629589	0.473450826751491	0.77640787272748	0.609796530125697	0.541996600348613	0.74994456270541
ENSMUSG00000014813.8	0.520040553574553	3.6211791802313	3.41112922390457	1.06157783611795	0.288427379966017	NA
ENSMUSG00000014837.13	4.59293676466499	0.746486540921209	1.11986655786055	0.666585260253984	0.505037086737472	NA
ENSMUSG00000014846.11	2.7680701319155	0.32715876027068	1.58815985108079	0.205998634235741	0.836791978149427	NA
ENSMUSG00000014850.14	34.7863100094053	-0.291247152197726	0.455147081646457	-0.639896780496017	0.522239707133489	0.73744991033541
ENSMUSG00000014852.15	0.288097097793785	2.56009459768791	4.02323148779407	0.636327938239418	0.524562698846668	NA
ENSMUSG00000014856.11	33.4031597346073	0.0330192874478251	0.463544778754316	0.0712321418797076	0.943213000860011	0.975979657019147
ENSMUSG00000014859.8	109.916042149318	0.656783746009474	0.311896485689836	2.10577475586759	0.0352239226404738	0.137072198280704
ENSMUSG00000014867.8	261.969991755838	0.0359865395203743	0.244603924326179	0.147121676888496	0.883035980367817	0.948391795188115
ENSMUSG00000014873.14	36.6987151743223	1.53443632321703	0.446749474386514	3.43466844661463	0.000593279218921975	0.0056780582865458
ENSMUSG00000014905.3	65.4424116589174	-0.222629643847204	0.371668619475674	-0.59900037878171	0.549172631979437	0.7551672247964
ENSMUSG00000014907.9	29.5855969956843	1.92119321209169	0.525032302216011	3.65919049929478	0.000253013212061306	0.00275211842803473
ENSMUSG00000014932.14	9.35800199709558	-0.40284539283446	0.832095725006514	-0.484133472541643	0.628291147326421	NA
ENSMUSG00000014956.14	413.08604492788	-0.21203658505545	0.238912009633636	-0.88750911007195	0.374804863638551	0.619443151507125
ENSMUSG00000014959.11	91.4928319085029	0.310143327293442	0.318468499878144	0.973858725155276	0.330126689987599	0.580742187825251
ENSMUSG00000014980.13	22.4471716366705	0.85818011892524	0.606808920036885	1.41425099498055	0.157288219922786	0.368046734896833
ENSMUSG00000015001.16	0	NA	NA	NA	NA	NA
ENSMUSG00000015002.15	336.931180867463	-0.212689519405516	0.239302608126186	-0.888788973387886	0.374116503030957	0.6190702396558
ENSMUSG00000015013.8	19.6107145480838	-0.0191483940924072	0.569429479936539	-0.0336273318594978	0.973174326917345	0.987637639631615
ENSMUSG00000015016.7	11.854370657405	0.654944197893685	0.709640555742358	0.922923855737845	0.356046887679131	0.605909266770692
ENSMUSG00000015023.7	39.7398348344013	0.319460417808738	0.518250507377482	0.616420849108884	0.537616796477018	0.747954665004931
ENSMUSG00000015027.10	13.2882313895043	-0.116982108189797	0.695415361603588	-0.16821904526245	0.866410958490784	0.940406192362143
ENSMUSG00000015053.13	1.18920172042998	0.331548972832029	1.95776030902993	0.169351156677761	0.86552043982132	NA
ENSMUSG00000015083.10	0.592091856529443	-0.429871122883779	2.97770799740955	-0.14436308840818	0.885213762622672	NA
ENSMUSG00000015085.8	0	NA	NA	NA	NA	NA
ENSMUSG00000015087.13	85.0407546374302	0.354674548047883	0.349570293471848	1.01460151125927	0.310295818676239	0.559132011361764
ENSMUSG00000015090.12	0	NA	NA	NA	NA	NA
ENSMUSG00000015092.8	55.7838762487837	-0.158890971921309	0.383778019257438	-0.414017906050855	0.678860993288527	0.837703658762323
ENSMUSG00000015093.14	0	NA	NA	NA	NA	NA
ENSMUSG00000015094.15	0	NA	NA	NA	NA	NA
ENSMUSG00000015095.11	52.7876085023948	0.886963469179875	0.386391796244386	2.29550284918287	0.0217043233161807	0.0980283453083564
ENSMUSG00000015112.14	5.27028701060467	-0.248017594122384	1.03779281150888	-0.238985654334784	0.81111670666017	NA
ENSMUSG00000015120.14	274.884990907226	0.264597876533802	0.246587944798426	1.07303654584614	0.283254719234456	0.529809479194188
ENSMUSG00000015126.9	35.2075971564287	0.412751827896932	0.451521553846165	0.91413538153609	0.360645713099023	0.609506131507364
ENSMUSG00000015127.13	141.699086759263	-0.631188347289284	0.283862199503641	-2.22357308719856	0.0261771809467983	0.111004664793619
ENSMUSG00000015133.15	1.59885015626837	-0.753177040831164	1.75258594844786	-0.429751842697472	0.667376167192566	NA
ENSMUSG00000015134.13	0	NA	NA	NA	NA	NA
ENSMUSG00000015143.13	502.949909193065	0.334696774401916	0.276270067969938	1.21148402670366	0.22570995287874	0.460846804596269
ENSMUSG00000015149.12	34.7807631393901	0.475379045556669	0.451446910030996	1.0530120707306	0.292335459902057	0.540449999354813
ENSMUSG00000015165.15	366.498413775891	-0.440747237473827	0.240918018544206	-1.82944903887691	0.0673323669903623	0.213223292449421
ENSMUSG00000015176.9	176.183103587144	2.14544125360288	0.288577436763431	7.4345426228235	1.04930390922326e-13	9.11940488379491e-12
ENSMUSG00000015189.11	46.1881850322582	-0.0844718863964777	0.428925292670734	-0.196938459540372	0.843875696638354	0.928366733769984
ENSMUSG00000015202.12	22.0750324717237	-1.22336607724617	0.59049142242769	-2.07177620331307	0.0382863169097669	0.146017495873951
ENSMUSG00000015214.13	105.476627293577	-0.623780468346222	0.315811189762426	-1.97516898883625	0.0482489738803864	0.171330652607034
ENSMUSG00000015217.10	27.4891753797397	-0.465008219504978	0.51306440936235	-0.906334976699908	0.364758577854081	0.611832205980232
ENSMUSG00000015222.16	2.03383211271963	1.3731012518907	1.73571176295413	0.791088290807987	0.428892471531648	NA
ENSMUSG00000015224.10	0	NA	NA	NA	NA	NA
ENSMUSG00000015242.13	0	NA	NA	NA	NA	NA
ENSMUSG00000015243.4	160.853676005492	-1.33850903702908	0.302908769940644	-4.41885204344318	9.92265459930228e-06	0.000180878220704231
ENSMUSG00000015247.9	67.4357679496839	-0.198131597868481	0.363883134400938	-0.544492390928385	0.586102683117371	0.780867200009162
ENSMUSG00000015289.4	12.6963135182795	-0.11713069472194	0.829131698358236	-0.14126910713204	0.887657353768077	0.949888765374125
ENSMUSG00000015290.14	41.1934007533216	-0.41333298029532	0.4260081996166	-0.97024653672702	0.331923619281382	0.582666542742368
ENSMUSG00000015291.9	77.1932144640905	-0.0923634220176266	0.344276813207408	-0.268282435744468	0.788481925062965	0.90122281758695
ENSMUSG00000015305.5	0.342814932541549	2.13816357269572	3.74763282236582	0.570537102763961	0.568313464655884	NA
ENSMUSG00000015312.8	229.190712795702	2.65055916304956	0.287923777081284	9.20576685231967	3.39240174532066e-20	5.83764492334779e-18
ENSMUSG00000015314.9	78.8962558556184	-0.568575542821879	0.362106738612444	-1.57018768830595	0.116371452953684	0.306008551715616
ENSMUSG00000015316.11	293.819988355894	2.71467046949079	0.263818451042139	10.289918914948	7.82422333426015e-25	2.1037380489992e-22
ENSMUSG00000015335.15	5.5927419802608	0.400133720354272	1.01741764291531	0.393283646239639	0.694109995530054	NA
ENSMUSG00000015337.5	13.1953340471391	-0.490802157260252	0.692323578312464	-0.708920182173458	0.478374010049058	0.702769290291774
ENSMUSG00000015340.9	5.76459520479161	-1.55143151844628	1.05495442200383	-1.47061473565789	0.14139533657533	NA
ENSMUSG00000015341.15	82.5558745868869	-0.621378577103479	0.343315370082152	-1.80993521191547	0.0703058348201861	0.219401660211761
ENSMUSG00000015342.6	7.69482063113748	0.393425449400083	0.919612680575141	0.427816468509361	0.66878474603169	NA
ENSMUSG00000015354.8	0.0626653341129435	1.93703867970293	4.04540729808436	0.47882414228604	0.632063740172013	NA
ENSMUSG00000015355.12	56.5802746666951	-0.282490187620104	0.413760255697516	-0.682738817298638	0.494771896670581	0.714744358454278
ENSMUSG00000015357.9	85.1461347507394	-0.833412102427957	0.340616896770323	-2.44677263615001	0.0144141735321772	0.0729097878135522
ENSMUSG00000015363.12	84.4188561793175	-0.175913167370836	0.347486893779605	-0.506244035443852	0.612685345217449	0.798356006398747
ENSMUSG00000015365.14	0	NA	NA	NA	NA	NA
ENSMUSG00000015377.9	41.3484686422804	1.25404010754821	0.418629214206217	2.99558670296351	0.00273917416846303	0.0202754895643603
ENSMUSG00000015396.3	147.82867426254	1.23832288606544	0.282461546068225	4.38404060057908	1.16498046528012e-05	0.000207525712697104
ENSMUSG00000015401.11	0	NA	NA	NA	NA	NA
ENSMUSG00000015405.14	0	NA	NA	NA	NA	NA
ENSMUSG00000015437.4	4.60008848285587	-1.51793496336659	1.174170939114	-1.2927717019738	0.196090030332708	NA
ENSMUSG00000015441.3	0	NA	NA	NA	NA	NA
ENSMUSG00000015443.8	0	NA	NA	NA	NA	NA
ENSMUSG00000015452.13	2.72920766019882	-0.0097292811197349	1.35950139172954	-0.0071565069215247	0.9942899823584	NA
ENSMUSG00000015461.14	35.3854814440695	1.31998702404732	0.456961408131681	2.88861816459333	0.00386938616982189	0.026697833684962
ENSMUSG00000015467.13	1.32448939478361	3.01287213548108	2.25567090491703	1.33568781195584	0.181651334735004	NA
ENSMUSG00000015468.13	1.47644631782506	0.354201300509212	2.04648884610805	0.173077562178177	0.862590461560443	NA
ENSMUSG00000015474.15	9.54622373681658	-1.09699863505393	0.821557795322649	-1.33526654034499	0.181789125562326	NA
ENSMUSG00000015476.6	0.734730295561769	-1.49003557239284	2.71335147010202	-0.549149488671593	0.58290286523634	NA
ENSMUSG00000015478.12	5.60639045875934	0.239387255249579	1.00928080131313	0.237185979301422	0.812512512907715	NA
ENSMUSG00000015484.3	0	NA	NA	NA	NA	NA
ENSMUSG00000015488.13	18.1094630832506	0.737339277678577	0.589558222356464	1.25066405609853	0.211057069524162	0.442263766728175
ENSMUSG00000015501.9	639.901025674942	1.06116385284366	0.229965639428881	4.61444525138212	3.94146652273109e-06	8.13246473898761e-05
ENSMUSG00000015519.11	0	NA	NA	NA	NA	NA
ENSMUSG00000015522.17	59.3576297338789	-0.86365876242495	0.402679937616239	-2.14477723309879	0.0319706623495424	0.128180605244857
ENSMUSG00000015533.8	0.70509363609936	0.923860895346346	2.60216349179021	0.355035684061019	0.722562858361613	NA
ENSMUSG00000015536.13	24.8561230855961	-0.612396176014875	0.523968488347103	-1.16876527813099	0.242498213318171	0.482194902330973
ENSMUSG00000015542.16	5.43224082316768	-0.18697349677996	1.03151135035169	-0.18126169597282	0.856162170144631	NA
ENSMUSG00000015568.14	0.405480266654493	2.31415383640431	3.49152014181635	0.662792635416516	0.507463370965447	NA
ENSMUSG00000015575.13	107.961778632583	-0.437286284674886	0.314797173893755	-1.38910486160359	0.164800865652067	0.379637656779219
ENSMUSG00000015579.4	0	NA	NA	NA	NA	NA
ENSMUSG00000015597.15	60.4943063947037	0.3760082780245	0.368225549891414	1.02113576348893	0.307190121122634	0.555732506757599
ENSMUSG00000015599.8	1.55066971102122	-0.807223629424113	1.75334699533175	-0.460390117628358	0.645236226773204	NA
ENSMUSG00000015605.5	153.428401002102	2.55253219063122	0.283653759915717	8.99876028926839	2.28280741610916e-19	3.5711409105824e-17
ENSMUSG00000015619.10	35.7585328266878	0.538679636762211	0.453387715253021	1.18812137744313	0.234785593252536	0.472283268872891
ENSMUSG00000015627.5	0.70509363609936	0.923860895346346	2.60216349179021	0.355035684061019	0.722562858361613	NA
ENSMUSG00000015647.9	2.27979336792232	1.2176418595193	1.51910377137859	0.801552785570593	0.422811698360793	NA
ENSMUSG00000015652.8	0	NA	NA	NA	NA	NA
ENSMUSG00000015653.12	0.150585938397506	1.06692664555661	4.0430678696176	0.26389036245823	0.791864402142933	NA
ENSMUSG00000015656.15	3607.665206	-0.479756784753675	0.234749490691482	-2.04369680777792	0.0409835087772003	0.152716374845834
ENSMUSG00000015659.11	8.62351225263248	-0.806693434950878	0.851127568840416	-0.947793802578766	0.343234436152013	NA
ENSMUSG00000015665.8	0	NA	NA	NA	NA	NA
ENSMUSG00000015668.12	12.8613285017363	0.665765169098556	0.690217922188753	0.964572416472967	0.334759020764208	0.584825708559441
ENSMUSG00000015671.10	238.748342698594	-0.460023805010749	0.260966558506869	-1.76276917488123	0.0779394283396208	0.235460267357478
ENSMUSG00000015672.3	34.5706615378258	-0.340318210929508	0.461882224105474	-0.736807335654887	0.461239521568275	0.690775429690763
ENSMUSG00000015697.13	124.078470374939	0.209512086647774	0.290630570010827	0.720887987247759	0.47097843438412	0.697533828254761
ENSMUSG00000015702.12	0.368070202713168	0.468069544539799	3.63024778690853	0.128935976829945	0.897408308863539	NA
ENSMUSG00000015709.8	1.39128377285984	-0.339510366336239	2.06431667083863	-0.16446622319739	0.869364134629703	NA
ENSMUSG00000015711.8	16.1616230713179	-0.755846490343905	0.667340473909642	-1.13262497914407	0.25737177422538	0.499870597163694
ENSMUSG00000015714.10	93.7968478212149	0.239249899380928	0.325110172241995	0.73590407132153	0.461789079398208	0.690940625266816
ENSMUSG00000015721.16	0.231969153181455	1.11144759640798	4.0201330676362	0.276470350037816	0.782186829728365	NA
ENSMUSG00000015733.12	442.928030234211	-0.69903340906614	0.249442540657338	-2.80238249347535	0.00507266919836409	0.0324917461243262
ENSMUSG00000015745.8	8.43417096305039	-0.825045432407731	0.860833449025519	-0.958426317357556	0.337847829834881	NA
ENSMUSG00000015747.5	14.1395612442947	-0.173538182689175	0.665126907842157	-0.260909881472362	0.794162004401419	0.903630652589302
ENSMUSG00000015748.12	45.62487311089	0.422552519822762	0.427971455911194	0.987338089927295	0.323476923638267	0.574209913551403
ENSMUSG00000015749.11	69.8330152170465	0.890820195705492	0.357697575114809	2.49042838889687	0.0127589204718374	0.0658930082471124
ENSMUSG00000015750.14	79.6101535607924	0.0322402500723316	0.335860861491467	0.0959928761248377	0.923526230463868	0.968672398745717
ENSMUSG00000015755.15	245.967854698246	-0.379972830555263	0.258175740538564	-1.47176039763699	0.141085591327166	0.343706626885691
ENSMUSG00000015757.9	168.8629789458	-0.995760257117433	0.286859596717276	-3.47124610266687	0.000518048975651406	0.00505362061961984
ENSMUSG00000015759.9	42.1762138976965	-0.196970302341764	0.427650884446338	-0.460586682982717	0.645095167690223	0.816538702774876
ENSMUSG00000015766.13	0.490538863777787	-1.0255518236788	2.97352974927883	-0.344893749231037	0.730174250013511	NA
ENSMUSG00000015776.11	22.0108931156696	-0.923301365393641	0.58830552456713	-1.56942494475638	0.116548955439584	0.30619456873349
ENSMUSG00000015787.14	0	NA	NA	NA	NA	NA
ENSMUSG00000015790.15	17.3444194743809	-0.10547381036618	0.603412123023887	-0.174795643543947	0.861240211587613	0.938226232020742
ENSMUSG00000015804.13	97.570223230339	0.284371583395129	0.313856573471021	0.906055846625068	0.364906293848851	0.611898996740502
ENSMUSG00000015806.11	24.9963768620408	-0.390560832462905	0.525048820077405	-0.743856223513324	0.456963461701781	0.687122269220923
ENSMUSG00000015812.7	1.18259950830806	-1.19700673718625	2.08261162394212	-0.574762343312225	0.565452037549948	NA
ENSMUSG00000015829.12	0.150585938397506	1.06692664555661	4.0430678696176	0.26389036245823	0.791864402142933	NA
ENSMUSG00000015837.14	792.137827126587	-0.37362055099663	0.228292853786507	-1.63658452202814	0.101717311864147	0.281135801888569
ENSMUSG00000015839.6	64.899968522817	-1.04862731458258	0.369465594678404	-2.83822723871039	0.00453648734914075	0.0301404920092718
ENSMUSG00000015843.9	0	NA	NA	NA	NA	NA
ENSMUSG00000015846.13	25.0940830192589	0.482204907043781	0.510521155425554	0.944534622941982	0.34489651769896	0.594806501960684
ENSMUSG00000015850.10	4.35952773607304	0.992347718793844	1.17781618562998	0.842531908544851	0.399490286800554	NA
ENSMUSG00000015852.12	0	NA	NA	NA	NA	NA
ENSMUSG00000015854.7	0	NA	NA	NA	NA	NA
ENSMUSG00000015869.15	63.1420633056639	-0.0465433915623019	0.363339489058661	-0.128098907396183	0.898070700697301	0.954995021621638
ENSMUSG00000015879.8	0.0626653341129435	1.93703867970293	4.04540729808436	0.47882414228604	0.632063740172013	NA
ENSMUSG00000015880.12	5.79561437267957	-1.66353604017451	1.08834334260315	-1.52850297792568	0.126387704732687	NA
ENSMUSG00000015882.16	40.0138863397195	-0.302219788471516	0.437190071273242	-0.691277795013396	0.48939098329636	0.71019059205294
ENSMUSG00000015889.7	100.42569931156	-0.422027607162604	0.325334721897211	-1.29721046896416	0.194558779589894	0.420696530900991
ENSMUSG00000015890.2	0.566836586357824	0.742923696562207	2.83258752095484	0.2622774022219	0.793107582784091	NA
ENSMUSG00000015932.8	22.9423072388261	-0.151657833073844	0.534413893015205	-0.283783477667803	0.776576317125067	0.894466215869354
ENSMUSG00000015937.13	172.484260213105	-0.0304644008087001	0.2701516379464	-0.11276778123679	0.910214662218261	0.962690467575405
ENSMUSG00000015942.8	19.6921766333693	0.382528430609436	0.589272341471634	0.649153886391679	0.516238914483371	0.733199012911015
ENSMUSG00000015943.10	8.31505760647025	-0.814696767927946	0.872338750725006	-0.933922478224023	0.350343882846552	NA
ENSMUSG00000015944.9	24.8512046045255	0.483551059545727	0.533564469858098	0.906265478423493	0.364795352938005	0.611832205980232
ENSMUSG00000015947.9	0.288097097793785	2.56009459768791	4.02323148779407	0.636327938239418	0.524562698846668	NA
ENSMUSG00000015950.12	18.8461902159282	0.264360193227267	0.577966247887078	0.457397286076327	0.647385514687399	0.818206834033803
ENSMUSG00000015957.10	0.339952925380281	-1.60366398424615	3.74725402238321	-0.427957105300867	0.668682350229694	NA
ENSMUSG00000015961.8	367.584813021371	-0.222141572795185	0.235562025288846	-0.943027945708969	0.345666608997918	0.595887034016059
ENSMUSG00000015962.5	0	NA	NA	NA	NA	NA
ENSMUSG00000015966.15	0.788955343464973	-0.328635654142502	2.6504642442198	-0.123991732715957	0.901321820886923	NA
ENSMUSG00000015968.15	3.30939593008403	0.310877227832356	1.29046881312436	0.240902550042795	0.809630645689058	NA
ENSMUSG00000015970.17	4.99196129260766	-0.842182470708593	1.07648092484488	-0.78234778830842	0.434010209199654	NA
ENSMUSG00000015971.4	50.7940034528293	-1.0358372166552	0.415643677578557	-2.49212792719414	0.0126980293277475	0.0656573583749635
ENSMUSG00000015980.13	0.266517209961512	0.232169084205471	4.01818798402947	0.057779547678765	0.953924229545482	NA
ENSMUSG00000015981.11	0.417103148359017	0.43617348106422	3.43727793347953	0.126895028422297	0.899023481576971	NA
ENSMUSG00000015994.9	90.4638993599559	-0.915539724030607	0.343339283098618	-2.66657434525963	0.00766286558114163	0.0448817532063598
ENSMUSG00000016018.3	132.468349335439	-0.050968332620481	0.296642910540238	-0.171817126954623	0.863581300398593	0.939601443975289
ENSMUSG00000016024.8	0.115931271564006	0.29763893709183	4.04178928838603	0.0736403894055258	0.941296532270958	NA
ENSMUSG00000016028.9	95.182460679996	0.0706145244384514	0.335823020843419	0.210273030899142	0.833454582965308	0.923294891892651
ENSMUSG00000016087.12	163.549048926317	-1.37338443016249	0.342110716016729	-4.01444434758757	5.95860004072825e-05	0.000830103696557209
ENSMUSG00000016128.13	1.58726691026312	1.76984093297625	2.50820971920857	0.705619198993735	0.4804249815221	NA
ENSMUSG00000016150.14	0	NA	NA	NA	NA	NA
ENSMUSG00000016179.10	0.0626653341129435	1.93703867970293	4.04540729808436	0.47882414228604	0.632063740172013	NA
ENSMUSG00000016181.8	78.5314043086894	0.94195206651199	0.36756966584107	2.56264908138332	0.0103876980589927	0.056638627439527
ENSMUSG00000016194.13	33.0061395422067	0.991261227952731	0.456382656630512	2.17199583189959	0.0298559773077098	0.122149704591315
ENSMUSG00000016200.12	0.723892429423122	2.05706559432767	2.60991536662804	0.788173295054146	0.430595347355035	NA
ENSMUSG00000016206.6	66.6375346665693	-0.151408259438816	0.363362676061517	-0.416686328601298	0.676907855495582	0.836927755621952
ENSMUSG00000016239.10	14.5283079501187	-0.00601909218216678	0.667189700080972	-0.00902156040693716	0.992801933877117	0.996424523439978
ENSMUSG00000016252.7	138.851986911968	-0.497563031202132	0.290623900708434	-1.71205131439381	0.0868872123228951	0.253158677557125
ENSMUSG00000016253.11	44.2265353011334	0.423978427200569	0.405822682654858	1.0447381216519	0.296144020656106	0.543731107240519
ENSMUSG00000016255.5	0	NA	NA	NA	NA	NA
ENSMUSG00000016256.10	34.4888610063512	0.319106160950735	0.446943049378355	0.713974993893682	0.475242642293001	0.700169125734414
ENSMUSG00000016257.14	75.7846702192952	0.704706448757691	0.334647826889448	2.10581510511495	0.0352204162216285	0.137072198280704
ENSMUSG00000016262.13	0	NA	NA	NA	NA	NA
ENSMUSG00000016283.12	0	NA	NA	NA	NA	NA
ENSMUSG00000016308.11	29.7440232997332	0.285486940758244	0.476018991509705	0.599738552138047	0.548680490885366	0.755024541415799
ENSMUSG00000016319.3	341.156384403277	0.418989963426639	0.242176659930168	1.73010051235926	0.083612318722969	0.246589796677566
ENSMUSG00000016327.8	0	NA	NA	NA	NA	NA
ENSMUSG00000016344.13	30.6521293189992	-0.309208728294165	0.489476348393971	-0.631713318342582	0.527574223681735	0.741464982123104
ENSMUSG00000016346.16	0.175841208569124	-0.546698891910202	4.01481580275988	-0.136170354698312	0.891686610366605	NA
ENSMUSG00000016349.10	0	NA	NA	NA	NA	NA
ENSMUSG00000016356.16	6.3470044422163	1.81209301264001	0.985836374466705	1.83812756312657	0.0660436104998315	NA
ENSMUSG00000016382.14	0.319783147412574	-0.878274552558833	4.01098798315197	-0.218967136338478	0.826675647943898	NA
ENSMUSG00000016386.14	0.0879206042845622	-0.000364418712234587	4.04679653155627	-9.00511575990808e-05	0.999928149571766	NA
ENSMUSG00000016409.4	61.3008016955549	-0.373970246248913	0.368096066203939	-1.01595827987393	0.309649254054546	0.558420075851041
ENSMUSG00000016427.7	24.5928678531772	-1.11979288929095	0.539932063192322	-2.07395145728192	0.038083819362979	0.145567828431395
ENSMUSG00000016458.12	0.115931271564006	0.29763893709183	4.04178928838603	0.0736403894055258	0.941296532270958	NA
ENSMUSG00000016477.16	11.6806210064532	0.898321261936749	0.719711278710268	1.24816893733631	0.21196919686542	0.443188923071804
ENSMUSG00000016481.14	162.651634705846	-0.925694560437361	0.288081771760999	-3.21330487097026	0.00131216925013711	0.0109186694663246
ENSMUSG00000016487.14	30.0453821810926	0.242628155864398	0.482450817461296	0.502907544319503	0.61502927667805	0.800077395908367
ENSMUSG00000016493.12	12.1101964823011	0.353082286695182	0.718779159579863	0.491224991695034	0.623267324725434	0.805073121443873
ENSMUSG00000016494.8	2.99258191036482	1.82276384484703	1.45937480585086	1.24900322901237	0.211663892825361	NA
ENSMUSG00000016495.11	37.9068705682238	1.38654383442929	0.449996847018641	3.08123010997866	0.00206147267242806	0.0159361283679884
ENSMUSG00000016496.7	485.848489203386	3.21631934725564	0.247666541143775	12.9864911602593	1.45967255077374e-38	8.97073044775518e-36
ENSMUSG00000016498.9	20.3429514612305	2.32764810588021	0.627122650280687	3.71163137679432	0.000205927738031623	0.00234055780452323
ENSMUSG00000016503.15	42.6204474536959	0.158637872188869	0.440367760194938	0.360239523707741	0.71866802037905	0.86144577069655
ENSMUSG00000016510.10	27.2121856641148	-0.812009503528358	0.511601269281494	-1.58719212067	0.112469138777214	0.299407323650727
ENSMUSG00000016520.7	124.171740836496	0.597457306822239	0.295909601526793	2.01905346680055	0.0434816626358844	0.15919839375283
ENSMUSG00000016524.11	0.0626653341129435	1.93703867970293	4.04540729808436	0.47882414228604	0.632063740172013	NA
ENSMUSG00000016526.8	2.38921560959791	-0.692590738252194	1.44213517930669	-0.480253687858275	0.6310470154455	NA
ENSMUSG00000016528.9	450.101666947731	0.504369806071196	0.225746364333844	2.23423224360465	0.0254677959136186	0.10918032687632
ENSMUSG00000016529.5	13.4201703601115	-0.8575442754193	0.721713129263528	-1.18820656109496	0.234752039410482	0.472283268872891
ENSMUSG00000016534.14	64.6132362873941	-0.573617993501828	0.373606448259073	-1.53535356837326	0.124697002425166	0.318838932798256
ENSMUSG00000016541.9	89.2220720854458	0.478907211679998	0.322985101875959	1.48275325672427	0.138139979279201	0.338760775437925
ENSMUSG00000016552.12	26.756783509846	0.689489935019549	0.497654798991632	1.385478320347	0.165906257125687	0.381061782250244
ENSMUSG00000016554.8	279.31486373466	0.310383630850985	0.259193789419847	1.19749640431476	0.231113128215753	0.467771666706266
ENSMUSG00000016559.13	904.347129197341	-0.20341445739989	0.23164974626753	-0.878112152840297	0.379882858483668	0.624119174029689
ENSMUSG00000016619.9	212.730180101656	0.136694374378643	0.256063366764241	0.533830262821226	0.593458974025548	0.786646281392054
ENSMUSG00000016624.14	1.90506573783516	-0.369288426999493	1.62476794438832	-0.227286873965575	0.820200679100286	NA
ENSMUSG00000016626.9	0	NA	NA	NA	NA	NA
ENSMUSG00000016637.6	2.41857156412062	-1.14891524890857	1.4792981945273	-0.776662374874119	0.437357990677557	NA
ENSMUSG00000016664.13	60.5640617474545	-0.357274509854649	0.365329735472214	-0.977950807625463	0.32809865455049	0.578950127922973
ENSMUSG00000016756.15	402.862545555638	-0.669075058896145	0.236968902914491	-2.82347198584777	0.00475065774319269	0.0310597714456154
ENSMUSG00000016757.9	37.8376524156293	-0.0700789374947951	0.447861484365111	-0.156474579621731	0.875658954942345	0.944661653769644
ENSMUSG00000016758.3	0.695881762143678	2.54762565953983	2.80887360284913	0.906991919093722	0.364411070553284	NA
ENSMUSG00000016763.13	0	NA	NA	NA	NA	NA
ENSMUSG00000016831.11	301.577904488497	-0.0242675251706531	0.243016450022696	-0.0998595986748496	0.920455791555449	0.967417925422338
ENSMUSG00000016833.13	22.1296825816072	-0.851726922799307	0.559659926383146	-1.52186512317162	0.128042879694122	0.323268592154319
ENSMUSG00000016918.14	0	NA	NA	NA	NA	NA
ENSMUSG00000016921.13	447.493814990389	0.76779706206019	0.232687888517203	3.29968640376152	0.000967929226248639	0.00850670384335372
ENSMUSG00000016933.16	506.272019198975	-0.596345627954395	0.271824065721751	-2.1938661919833	0.0282450305070784	0.117457826236299
ENSMUSG00000016940.17	24.7984736071214	-0.296731729401501	0.518518899761124	-0.572267914512282	0.567140483309577	0.767588051492858
ENSMUSG00000016942.5	0.206713883009836	2.79199501225836	4.01367463718946	0.695620663017525	0.486666422381175	NA
ENSMUSG00000016946.5	46.0206125994683	-0.0901321068527701	0.414493254857809	-0.217451323505107	0.827856637555527	0.920915788600463
ENSMUSG00000016982.6	0	NA	NA	NA	NA	NA
ENSMUSG00000016984.7	48.244291168608	-0.380828370507658	0.401914648599849	-0.947535432794876	0.343366009748338	0.592999026068787
ENSMUSG00000016995.16	0	NA	NA	NA	NA	NA
ENSMUSG00000016998.2	0	NA	NA	NA	NA	NA
ENSMUSG00000017000.2	0	NA	NA	NA	NA	NA
ENSMUSG00000017002.13	1.39636926506375	-1.6612240189672	2.05672710898241	-0.807702690216939	0.419261754567517	NA
ENSMUSG00000017003.7	0	NA	NA	NA	NA	NA
ENSMUSG00000017004.7	0	NA	NA	NA	NA	NA
ENSMUSG00000017007.8	0.342814932541549	2.13816357269572	3.74763282236582	0.570537102763961	0.568313464655884	NA
ENSMUSG00000017009.3	9.98598402495817	0.0257388210387381	0.775016316628314	0.0332106827772531	0.97350657919846	0.987777467860078
ENSMUSG00000017049.4	0	NA	NA	NA	NA	NA
ENSMUSG00000017057.9	0.548118705686819	0.198765713542841	3.06648860866237	0.064818670117136	0.948318376105687	NA
ENSMUSG00000017064.4	0	NA	NA	NA	NA	NA
ENSMUSG00000017119.18	269.695992077563	-1.05340024011618	0.259360292687065	-4.06153243120826	4.87516440309815e-05	0.000708545853450278
ENSMUSG00000017132.16	509.365542307752	-0.580912350011215	0.226452910711479	-2.56526775560571	0.01030962131028	0.0563915967918939
ENSMUSG00000017144.7	0.125330668225887	2.27160461047965	4.03614422430032	0.562815520021077	0.573560510917365	NA
ENSMUSG00000017146.11	24.4749644283673	-0.555929784985338	0.534043091713681	-1.04098300981935	0.297883433631935	0.545200821733497
ENSMUSG00000017165.1	0.0626653341129435	1.93703867970293	4.04540729808436	0.47882414228604	0.632063740172013	NA
ENSMUSG00000017167.6	0.238506542682068	0.965207036957504	3.99090089402657	0.241851918297993	0.808894907822102	NA
ENSMUSG00000017176.16	37.5915887442573	-0.388931734519265	0.443083231757765	-0.877784819290782	0.380060504261314	0.624226724449371
ENSMUSG00000017188.3	23.9180602661859	-0.820723578070279	0.563665478215619	-1.45604726524751	0.145379554026791	0.351095183520589
ENSMUSG00000017195.14	0.614524244760415	1.62939544241534	2.91150662097027	0.559639957772905	0.575725044222517	NA
ENSMUSG00000017204.4	0.339952925380281	-1.60366398424615	3.74725402238321	-0.427957105300867	0.668682350229694	NA
ENSMUSG00000017210.13	66.5264113409235	0.0150261172045282	0.355035965798301	0.0423228029046068	0.966241367480871	0.984550062269708
ENSMUSG00000017211.13	0.144048548896892	2.04666396042304	4.05459644924663	0.504776242479896	0.613716004026025	NA
ENSMUSG00000017221.13	83.0858142619487	0.761838303505993	0.330323240241009	2.30634182127223	0.0210915400465956	0.0958493965409119
ENSMUSG00000017264.15	164.232840036963	1.14811734137134	0.268906247536815	4.2695822499035	1.95839421977214e-05	0.000325290036040917
ENSMUSG00000017286.14	37.3873758793707	-0.645067781231795	0.447456086224825	-1.4416337180129	0.149405731149824	0.357278185328818
ENSMUSG00000017288.14	33.0030250441785	0.496182142942483	0.471410665963884	1.05254755305111	0.292548405260787	0.540495271390124
ENSMUSG00000017291.12	566.9632883253	-0.336650657498634	0.225347090258305	-1.49392058762661	0.135196376704664	0.333943416377942
ENSMUSG00000017299.12	37.509840788576	0.659002417134636	0.434171514762184	1.51783890634926	0.129055014369097	0.324562080462539
ENSMUSG00000017300.9	0.198766383644657	1.1656308671802	4.02277772299595	0.289757711572515	0.77200160182017	NA
ENSMUSG00000017307.14	17.9869546492048	0.208073147147823	0.592944142953373	0.350915258411086	0.725651923983829	0.864645550630503
ENSMUSG00000017309.10	0.224021653816275	-1.22679238043995	4.01216551260656	-0.305768138573861	0.759781189048016	NA
ENSMUSG00000017310.7	0	NA	NA	NA	NA	NA
ENSMUSG00000017311.14	0	NA	NA	NA	NA	NA
ENSMUSG00000017314.11	1.18274524358212	2.05242468603596	2.1022222837873	0.976311925653445	0.328909911920244	NA
ENSMUSG00000017316.12	0	NA	NA	NA	NA	NA
ENSMUSG00000017344.4	0	NA	NA	NA	NA	NA
ENSMUSG00000017376.14	129.2962952287	-0.00908982357757661	0.297766430655628	-0.0305266901898997	0.975647007603409	0.988631121589887
ENSMUSG00000017386.9	60.5905572385178	1.66598629451147	0.386734525035381	4.30782923856889	1.64864584192096e-05	0.000282431199832756
ENSMUSG00000017390.14	2.04261868466358	-0.482439426410783	1.54854209635813	-0.311544276093873	0.755386888933344	NA
ENSMUSG00000017400.9	0.198766383644657	1.1656308671802	4.02277772299595	0.289757711572515	0.77200160182017	NA
ENSMUSG00000017404.11	2466.25166740835	-0.483604185263065	0.198499598378588	-2.43629805406816	0.0148384523182578	0.0745736236835806
ENSMUSG00000017405.13	38.0917279137505	2.30867628402389	0.463051426790063	4.98578807979916	6.17097554150004e-07	1.58021052259126e-05
ENSMUSG00000017412.14	0	NA	NA	NA	NA	NA
ENSMUSG00000017417.13	0.770688462206393	-0.468268621929758	2.33035870590188	-0.200942722141367	0.840743361520843	NA
ENSMUSG00000017418.12	317.876724791226	1.46098076054301	0.245555722944018	5.94969134918548	2.686486060573e-09	1.11664377126426e-07
ENSMUSG00000017421.17	214.822038134726	0.079826998695616	0.262581309596631	0.304008685226849	0.761121274284183	0.884957762694744
ENSMUSG00000017428.15	102.235563684231	0.584294143826849	0.330217600725548	1.7694215648804	0.0768235494731143	0.233317973761622
ENSMUSG00000017446.13	0.410565758858404	1.11383686068192	3.19941364284657	0.348137810555476	0.727736689599825	NA
ENSMUSG00000017453.4	0.519959640921797	1.11651243208133	3.4235305598146	0.326128951552806	0.744326793292077	NA
ENSMUSG00000017466.8	48.8713939593389	-1.03495241232844	0.440437965468975	-2.34982561329933	0.0187822083164393	0.0881145694409182
ENSMUSG00000017478.14	163.512689737094	0.521240613789494	0.267874123281471	1.94584160427395	0.0516737693182058	0.179058039151769
ENSMUSG00000017485.9	827.617018657208	-0.934055453525174	0.214618210425173	-4.35217240734021	1.34795193951953e-05	0.000235249056544138
ENSMUSG00000017491.8	0	NA	NA	NA	NA	NA
ENSMUSG00000017493.11	121.390660578081	-2.1309949711084	0.322269453573584	-6.61246341369994	3.77976552944485e-11	2.3396476701686e-09
ENSMUSG00000017499.14	4.3588656682866	-0.720587860652137	1.14268746116292	-0.630608005376021	0.528296863215528	NA
ENSMUSG00000017548.14	287.244654894173	-0.0598435786763951	0.240048222319828	-0.249298153921184	0.803130159212545	0.908778005791061
ENSMUSG00000017550.13	30.2275513404995	-0.692940012788202	0.498395274540788	-1.39034226082232	0.164424970606537	0.379100309738493
ENSMUSG00000017561.15	641.281691018515	-1.39399612329706	0.231547323565746	-6.0203508372717	1.74039425255479e-09	7.48717607449071e-08
ENSMUSG00000017588.2	0	NA	NA	NA	NA	NA
ENSMUSG00000017607.8	0.658471698202353	2.15855964986712	2.855295796165	0.755984599832467	0.44965842908195	NA
ENSMUSG00000017615.11	50.1020236572089	-0.0445983586928506	0.40031182101265	-0.111409047527081	0.911291985837641	0.963025463565189
ENSMUSG00000017631.17	106.371132848117	-0.246942823422855	0.313711109403307	-0.78716633240229	0.431184503097471	0.667505458970464
ENSMUSG00000017639.12	98.5348820119495	0.765975002642346	0.325175561589363	2.35557370578061	0.018494127693056	0.087143195329164
ENSMUSG00000017652.15	12.1440975678324	0.593392257383949	0.719475475418797	0.824756753575989	0.409509703598894	0.649598357257537
ENSMUSG00000017664.15	29.3004713981421	1.09178251914587	0.482042168075933	2.26491081372343	0.0235181530488876	0.103314316919838
ENSMUSG00000017667.9	0.363837210907955	1.77761281458455	3.95847083342862	0.449065532976247	0.653384383282901	NA
ENSMUSG00000017670.15	72.6915314674957	0.69495196627258	0.349813450894038	1.98663591836292	0.0469627578462691	0.167941632796882
ENSMUSG00000017677.10	281.756844075728	0.158261001258237	0.245350728296078	0.645039867447446	0.518901350366842	0.734797106411505
ENSMUSG00000017679.15	124.829971113849	0.315114140513803	0.301652485714022	1.0446263678813	0.296195688009799	0.543731107240519
ENSMUSG00000017686.15	92.9177333504425	-0.696504058506242	0.346525345509602	-2.00996569957086	0.0444348192884497	0.161698036521335
ENSMUSG00000017688.13	1.58726691026312	1.76984093297625	2.50820971920857	0.705619198993735	0.4804249815221	NA
ENSMUSG00000017692.8	3.52653580504071	0.0956244577140674	1.22208649459927	0.0782468819814784	0.937631669878213	NA
ENSMUSG00000017697.3	11.3897986228307	-1.19149714458312	0.764669084464409	-1.55818663104141	0.119189013186797	0.309913046074102
ENSMUSG00000017707.9	461.71837878316	-0.825632463112343	0.257686949005918	-3.20401349892727	0.00135526122200201	0.0112337837708143
ENSMUSG00000017713.9	5.33293891689768	-0.83803056668454	1.03947447976684	-0.80620600408825	0.420124077343926	NA
ENSMUSG00000017715.10	101.160632596748	0.597645470983496	0.329103133317262	1.81598231824597	0.0693730845200901	0.217821234807035
ENSMUSG00000017716.14	1.39595739087195	-0.16407480424256	1.82423913770535	-0.0899414999115439	0.928333702612596	NA
ENSMUSG00000017718.14	3.23700023777016	0.856999247187472	1.30521886975446	0.656594282419997	0.511441826249508	NA
ENSMUSG00000017720.2	0	NA	NA	NA	NA	NA
ENSMUSG00000017721.14	47.7474329755311	0.616627700576367	0.427540401385203	1.44226767477069	0.149226875598047	0.357048953739042
ENSMUSG00000017723.10	0	NA	NA	NA	NA	NA
ENSMUSG00000017724.13	1.8566461273859	3.90421784205325	2.11104612545702	1.84942327643742	0.0643967169680986	NA
ENSMUSG00000017733.4	0	NA	NA	NA	NA	NA
ENSMUSG00000017734.14	2.51588890285555	0.74692311366195	1.42741776757764	0.523268751887188	0.60078724317858	NA
ENSMUSG00000017737.2	0.458746204105555	1.21706892072815	3.11160717779683	0.391138357506263	0.695694969367822	NA
ENSMUSG00000017740.15	0	NA	NA	NA	NA	NA
ENSMUSG00000017747.12	5.95949907579361	-0.0438996963186277	0.998566442921947	-0.0439627193861742	0.964934120739621	NA
ENSMUSG00000017754.12	0.774960579232226	2.99750767498239	2.76735330660944	1.08316768510304	0.278734000327696	NA
ENSMUSG00000017756.8	307.829892598118	-0.555516181342594	0.239566768757583	-2.3188365574389	0.0204039001605716	0.0932811673653339
ENSMUSG00000017760.14	59.5028796010191	-0.550612669273181	0.371074548464815	-1.48383302371758	0.137853223765049	0.338302663227177
ENSMUSG00000017764.2	6.49519455235177	-0.599426268152122	0.955869167719075	-0.627100745996957	0.53059319816883	NA
ENSMUSG00000017765.15	43.5162788101809	0.313870103955927	0.426573474695816	0.735793767251338	0.461856214877572	0.690940625266816
ENSMUSG00000017767.3	0	NA	NA	NA	NA	NA
ENSMUSG00000017774.18	73.4620877187854	1.19490939608526	0.359280770972578	3.32583731895984	0.000881533627929593	0.00785986447929229
ENSMUSG00000017776.14	118.556065949794	0.0137790349322971	0.296393637259214	0.0464889700727501	0.962920525189385	0.983612513205446
ENSMUSG00000017778.13	113.810464692951	-0.266511756423709	0.312822200837059	-0.851959214245564	0.394236729533256	0.637067426046805
ENSMUSG00000017781.16	156.494859178811	0.905763385017809	0.298958060357635	3.02973394975292	0.00244769250828806	0.018409044004642
ENSMUSG00000017801.14	46.2964097764899	0.0160832037904451	0.414882997476132	0.0387656372719164	0.969077241714417	0.986077553391335
ENSMUSG00000017802.13	257.720882356574	-1.03166480297286	0.26859015373128	-3.84103731518401	0.000122515486806732	0.00152329949203053
ENSMUSG00000017817.10	0.259979820460898	1.22487005250833	4.04340119585505	0.302930625277541	0.761942731658975	NA
ENSMUSG00000017830.14	7.62299455508611	-0.408044817194115	0.921870271838532	-0.442627156617526	0.658035438731442	NA
ENSMUSG00000017831.7	161.443744255862	-0.466378102229896	0.280418026789834	-1.66315307032466	0.096281798925826	0.271966053170652
ENSMUSG00000017832.2	0.115931271564006	0.29763893709183	4.04178928838603	0.0736403894055258	0.941296532270958	NA
ENSMUSG00000017837.11	45.6749908429551	0.11853533776008	0.421007218058431	0.281551794543409	0.778287207676481	0.895238387011824
ENSMUSG00000017843.12	300.766066826856	-0.414218134356673	0.254249266192644	-1.62918123839469	0.103274657471817	0.284526145657225
ENSMUSG00000017858.11	25.2758165501183	0.547801057870857	0.512166513560187	1.06957609169519	0.284810161537878	0.531793973496507
ENSMUSG00000017861.10	4.49740076075632	0.0691545535868686	1.10892552800725	0.0623617653668229	0.950274742486031	NA
ENSMUSG00000017868.15	0	NA	NA	NA	NA	NA
ENSMUSG00000017897.17	6.65121417272571	-1.21584963179292	0.952400099048032	-1.27661644828494	0.201737691968606	NA
ENSMUSG00000017922.12	0	NA	NA	NA	NA	NA
ENSMUSG00000017929.12	63.6305200477535	0.778413392476339	0.360276012067748	2.16060288890386	0.0307260280783268	0.124642501454938
ENSMUSG00000017943.14	0	NA	NA	NA	NA	NA
ENSMUSG00000017950.15	0	NA	NA	NA	NA	NA
ENSMUSG00000017969.12	0.0879206042845622	-0.000364418712234587	4.04679653155627	-9.00511575990808e-05	0.999928149571766	NA
ENSMUSG00000017978.17	0.17859660567695	1.12852119329131	4.02257142405111	0.280547210807454	0.779057710052709	NA
ENSMUSG00000017999.15	167.651758637395	0.852484319181744	0.276907184668023	3.07859227344992	0.00207981110497224	0.0160256747591877
ENSMUSG00000018001.17	139.514341974291	-1.27095481735582	0.313795414109504	-4.05026574707144	5.1159500684429e-05	0.000733582504615029
ENSMUSG00000018008.7	137.814678260663	-1.33647317628435	0.298023857914269	-4.48445029078448	7.3102144721437e-06	0.000138265688451177
ENSMUSG00000018012.10	0.17859660567695	1.12852119329131	4.02257142405111	0.280547210807454	0.779057710052709	NA
ENSMUSG00000018040.8	161.269709200322	0.511769215904262	0.272415623234792	1.87863386771754	0.0602945034139262	0.198232291697906
ENSMUSG00000018042.16	73.7052491152074	-0.45402420469948	0.344821073741404	-1.31669506092882	0.187940859853951	0.411134039087172
ENSMUSG00000018068.12	66.8091981130804	0.0922704815981193	0.352106709179207	0.262052608464094	0.793280883226618	0.903630652589302
ENSMUSG00000018076.11	338.709639201665	0.336596059670918	0.285299860519655	1.17979749116537	0.238080767611038	0.476383005703575
ENSMUSG00000018102.4	12.0653503057106	-1.82196479045364	0.77566985844454	-2.34889208420093	0.0188293631937023	0.0882876517267654
ENSMUSG00000018126.14	0	NA	NA	NA	NA	NA
ENSMUSG00000018143.9	207.491831126836	1.05362950337739	0.302055342330289	3.48820019288147	0.000486283834873705	0.00482026050144396
ENSMUSG00000018160.14	253.161948883552	0.298377639266291	0.24782963748112	1.20396269913045	0.228603996001971	0.464640580309529
ENSMUSG00000018166.8	28.2568318551471	-0.805234708444739	0.508260894096825	-1.58429404622135	0.113126820050095	0.300456490772693
ENSMUSG00000018167.9	100.958399016289	0.758604989046698	0.306712565674456	2.47334173407124	0.0133856077778043	0.0686220034655401
ENSMUSG00000018168.8	167.579407451578	0.58162346072471	0.287956691918813	2.0198296377453	0.0434010617678871	0.159098068947121
ENSMUSG00000018169.11	80.2412921894327	-0.264789936825168	0.333658673220399	-0.793595245912462	0.427431100990955	0.664718448205051
ENSMUSG00000018171.8	143.406365026587	0.166318791881528	0.30299395923587	0.548917847408484	0.583061829521717	0.778743244521088
ENSMUSG00000018189.11	19.872560684169	0.0795917104093705	0.572359773993295	0.13905888223777	0.889403619686933	0.950454065126736
ENSMUSG00000018196.17	42.2108773280615	0.300649009413545	0.42753811830302	0.703209834498214	0.481924991316552	0.704379381402153
ENSMUSG00000018199.8	23.5545956822934	-1.38980361959218	0.621620619338397	-2.23577464510649	0.0253665365944623	0.108941270489542
ENSMUSG00000018209.14	1414.43793091314	-0.957400894903565	0.216561402098082	-4.42092120584791	9.8281009383091e-06	0.000179916979730237
ENSMUSG00000018211.12	0	NA	NA	NA	NA	NA
ENSMUSG00000018217.11	0	NA	NA	NA	NA	NA
ENSMUSG00000018238.6	0.410565758858404	1.11383686068192	3.19941364284657	0.348137810555476	0.727736689599825	NA
ENSMUSG00000018239.8	2.96920522539821	0.808347941946797	1.34010090509237	0.60319931049601	0.546376106334097	NA
ENSMUSG00000018259.11	0	NA	NA	NA	NA	NA
ENSMUSG00000018263.10	0.0626653341129435	1.93703867970293	4.04540729808436	0.47882414228604	0.632063740172013	NA
ENSMUSG00000018286.6	161.436644400085	-0.242455974962742	0.284695350192111	-0.851633069521979	0.394417779224837	0.637067426046805
ENSMUSG00000018287.11	24.3102338242791	0.239970652198596	0.519200163536444	0.462192944170273	0.643942962667729	0.816458186087995
ENSMUSG00000018293.4	645.499307204051	1.78504372849133	0.222421035087203	8.02551668636682	1.01099512321673e-15	1.15981360535424e-13
ENSMUSG00000018322.9	81.2934227834822	-0.00792434492929642	0.335794312844294	-0.0235988062518823	0.981172624360185	0.991157913195194
ENSMUSG00000018326.8	152.153434208596	0.0924126516097688	0.310349867041707	0.29776926438106	0.765879274462854	0.887565803616228
ENSMUSG00000018334.15	44.9998997157245	1.19378420033846	0.417091180901765	2.86216600829933	0.00420756460009686	0.0285729169843989
ENSMUSG00000018339.10	0	NA	NA	NA	NA	NA
ENSMUSG00000018340.12	284.030456245445	-0.276716120578098	0.241984534397081	-1.14352812367762	0.252819384870184	0.494082853590488
ENSMUSG00000018341.11	23.2528397871284	0.210867468819768	0.534557923762149	0.394470756949425	0.693233513123649	0.846159901676249
ENSMUSG00000018347.15	58.3247765955182	-0.102370925527174	0.370174312064961	-0.27654789160305	0.782127281049017	0.898421687071781
ENSMUSG00000018362.13	25.0408273725467	0.322219932166188	0.51704802273278	0.623191498660303	0.533158687623014	0.744106202468865
ENSMUSG00000018363.15	142.502205784504	-0.774282978041349	0.293169501259832	-2.6410761512164	0.00826431414434956	0.0474357297518236
ENSMUSG00000018372.12	27.2312007269666	0.378412578432567	0.497735226175343	0.760268830760351	0.447093909099453	0.678826105456549
ENSMUSG00000018377.9	173.156889003224	-0.617444960913962	0.272583217875445	-2.26516131743701	0.0235027819628586	0.103314316919838
ENSMUSG00000018378.12	2.44958997383539	0.755355278849703	1.44122888276038	0.524105010581647	0.600205503732833	NA
ENSMUSG00000018379.16	507.765998610041	0.366716322890373	0.218120784216118	1.68125345875808	0.0927136937671643	0.26431697189287
ENSMUSG00000018381.14	5.39788028909383	0.108428070585551	1.03779278549149	0.104479499280967	0.916788836435941	NA
ENSMUSG00000018387.11	0	NA	NA	NA	NA	NA
ENSMUSG00000018395.18	10.5176597221549	-0.405040864073695	0.769711244589979	-0.52622443405963	0.598732279099561	0.790469929319108
ENSMUSG00000018398.17	7.72667836112556	-0.0427595505035838	0.865688588905482	-0.0493936861956863	0.960605559708173	NA
ENSMUSG00000018401.16	47.8843282294448	-0.694954202272805	0.408628469855139	-1.70069942145531	0.0889994438251086	0.257655186632313
ENSMUSG00000018405.7	46.7994116155083	-0.0775086878584296	0.40358529067775	-0.192050329010425	0.847702782264496	0.930310553393332
ENSMUSG00000018411.16	0	NA	NA	NA	NA	NA
ENSMUSG00000018412.15	451.124414797591	-0.421771852493627	0.225440570947291	-1.87087821292042	0.0613619634975385	0.200751280193653
ENSMUSG00000018415.13	75.9627079117277	0.433188082972608	0.338569796199347	1.27946464166446	0.200733483201011	0.427608539109061
ENSMUSG00000018417.13	2.21715639342158	-0.858787121790138	1.4941661987483	-0.574760105341404	0.565453551319583	NA
ENSMUSG00000018425.17	328.04589041715	-1.38319952864935	0.291809123456273	-4.74008321695473	2.13630460472413e-06	4.81171853901738e-05
ENSMUSG00000018427.7	31.5599765508322	-1.45082635219854	0.516018461802476	-2.81157838254612	0.00492990773926192	0.0320127744819695
ENSMUSG00000018428.14	6.39980544195635	0.485308961100642	0.960510675752267	0.505261392040802	0.613375255803719	NA
ENSMUSG00000018433.13	171.510163923244	0.581852588401838	0.268027661659373	2.17086768134139	0.0299411759760808	0.122265722875273
ENSMUSG00000018442.12	76.0363073081818	-0.4188478988738	0.342052638924306	-1.22451298779919	0.220758769860239	0.45451267190177
ENSMUSG00000018446.8	33.5924009651438	2.08895562324095	0.514993841146389	4.05627301986928	4.98619717363219e-05	0.000720834515344514
ENSMUSG00000018449.11	16.6250165406112	-1.33628868822338	0.652642516510511	-2.04750480457222	0.0406085456114845	0.151779290374115
ENSMUSG00000018459.14	0	NA	NA	NA	NA	NA
ENSMUSG00000018470.7	0.2614317177576	1.43789971781197	4.01347221223144	0.358268262934481	0.720142566386536	NA
ENSMUSG00000018474.16	492.909253830112	0.28297224063163	0.231669493022958	1.22144800741454	0.22191643985763	0.455805454412759
ENSMUSG00000018476.7	743.142559263398	3.11909058156135	0.789116839086504	3.95263467596518	7.72953995488687e-05	0.0010423975199349
ENSMUSG00000018479.11	0	NA	NA	NA	NA	NA
ENSMUSG00000018481.9	209.65629057949	0.427756668816822	0.292637718557078	1.46172773259025	0.143815834484656	0.348462810449445
ENSMUSG00000018486.2	0	NA	NA	NA	NA	NA
ENSMUSG00000018500.2	0.269379217122779	3.08361466808462	4.00474292639203	0.769990664759779	0.441305430271774	NA
ENSMUSG00000018501.16	574.392424809787	0.273989194282756	0.236730067715934	1.15739076546681	0.247112745195372	0.487539110218066
ENSMUSG00000018507.15	48.9838819415556	-0.0614841761378413	0.403181781816173	-0.152497406655826	0.878794635705365	0.945993958231125
ENSMUSG00000018509.7	1.50806488261103	1.46768222849195	1.98874359098078	0.737994699340877	0.460517670220038	NA
ENSMUSG00000018537.15	0.777264976927627	2.65294200652181	2.65522467366536	0.999140311113334	0.317726725780516	NA
ENSMUSG00000018541.9	64.0504319216681	0.32197565134217	0.39111064004613	0.823234190980318	0.41037482899209	0.650070471789218
ENSMUSG00000018543.8	2.32037121364193	2.33018614183351	1.78590379052962	1.3047657741644	0.191972616770109	NA
ENSMUSG00000018547.8	88.7664359773779	-0.349162630835962	0.324548059951778	-1.0758426067555	0.281997653548051	0.528492226340108
ENSMUSG00000018548.14	28.0844070503558	1.17595838426928	0.488476472178275	2.40740025619925	0.0160665503453328	0.0788571586829682
ENSMUSG00000018554.12	0	NA	NA	NA	NA	NA
ENSMUSG00000018559.15	53.3241175336174	0.887385175714677	0.380633735540074	2.33133611884292	0.0197356430970855	0.0913915356336512
ENSMUSG00000018565.16	60.987246230179	1.14065296328449	0.372714622945045	3.06039230302127	0.00221047243012735	0.0168756919155419
ENSMUSG00000018566.13	0	NA	NA	NA	NA	NA
ENSMUSG00000018567.13	99.7335371434892	-0.271632254466112	0.365775490264388	-0.742620163723304	0.457711677265529	0.688044239881147
ENSMUSG00000018569.11	0	NA	NA	NA	NA	NA
ENSMUSG00000018570.16	2.04841018381893	-0.216274828670233	1.58169199235884	-0.136736374537557	0.891239176830884	NA
ENSMUSG00000018572.9	66.9063167305411	0.080400499817382	0.372948512519768	0.21558069577532	0.829314604521269	0.921218900280567
ENSMUSG00000018574.13	84.4160977720239	0.390844414598564	0.333378863827299	1.17237310761559	0.241047291528861	0.480308220545234
ENSMUSG00000018581.14	1.25748445881201	2.10694811623159	2.11447003614414	0.996442645304039	0.319035121327212	NA
ENSMUSG00000018583.5	733.53652736414	1.08361861065139	0.220743471937582	4.90894974668965	9.15654357969671e-07	2.23815059544632e-05
ENSMUSG00000018585.9	26.0354050361702	-0.136994234407283	0.528698756106969	-0.259115862908453	0.795545845845108	0.90433035508671
ENSMUSG00000018589.8	0.144048548896892	2.04666396042304	4.05459644924663	0.504776242479896	0.613716004026025	NA
ENSMUSG00000018593.11	0	NA	NA	NA	NA	NA
ENSMUSG00000018595.6	0	NA	NA	NA	NA	NA
ENSMUSG00000018599.5	43.0320221923962	-0.802662829046739	0.431253731371516	-1.86123103559946	0.0627115573663737	0.203611411162369
ENSMUSG00000018604.17	0.144048548896892	2.04666396042304	4.05459644924663	0.504776242479896	0.613716004026025	NA
ENSMUSG00000018620.2	0	NA	NA	NA	NA	NA
ENSMUSG00000018623.9	0	NA	NA	NA	NA	NA
ENSMUSG00000018634.10	0	NA	NA	NA	NA	NA
ENSMUSG00000018648.14	4.08224305471176	-1.00376160508681	1.19416519059115	-0.840555069763771	0.40059723833456	NA
ENSMUSG00000018651.13	7.23492982753069	0.435236476399925	0.907964084503595	0.479354287056276	0.631686608073065	NA
ENSMUSG00000018654.16	1201.24015316679	-0.0555226662465246	0.203943155420719	-0.272245793843807	0.785433032698168	0.899835446645072
ENSMUSG00000018656.5	0	NA	NA	NA	NA	NA
ENSMUSG00000018659.11	46.3602756005803	0.562118476401001	0.399564833555276	1.40682670043643	0.159478783099341	0.371153759747559
ENSMUSG00000018661.16	102.327747932879	0.137485104278104	0.308073910542933	0.446273116849808	0.655399972748849	0.823774018781805
ENSMUSG00000018666.12	25.7010531699066	-0.0772718504517777	0.515686675256659	-0.14984263538188	0.880888770902853	0.947395873106019
ENSMUSG00000018669.13	38.7151399051864	-0.473254587632376	0.45642469921016	-1.03687330780157	0.299794905138554	0.547767119093675
ENSMUSG00000018672.14	0	NA	NA	NA	NA	NA
ENSMUSG00000018677.8	35.1210265223996	1.0624055379478	0.45754733506862	2.32195765666184	0.0202352157470735	0.0926576882851623
ENSMUSG00000018678.11	33.2094612834585	1.22282529534462	0.510076824501418	2.39733553183853	0.01651479311792	0.0802786892579569
ENSMUSG00000018697.13	63.6474415247607	0.672275339288731	0.371085519159052	1.81164530702311	0.0700410195446135	0.218900447570597
ENSMUSG00000018698.14	0	NA	NA	NA	NA	NA
ENSMUSG00000018707.12	1402.82926667483	0.053809057430614	0.216325482568327	0.248741187546494	0.803560986854098	0.908778005791061
ENSMUSG00000018727.18	0	NA	NA	NA	NA	NA
ENSMUSG00000018733.9	15.8860539437946	0.62153141501756	0.637494024313032	0.974960378157782	0.329579914257796	0.58049244263543
ENSMUSG00000018736.13	116.025202161894	-0.00107055062599636	0.313163430265858	-0.00341850459706462	0.997272433273439	0.998432861983322
ENSMUSG00000018740.13	1.74014330805744	-0.739496824081026	1.66013433795588	-0.445443966294658	0.655998945109197	NA
ENSMUSG00000018750.13	236.85560615241	-0.0607119172157139	0.252633619778722	-0.240316064302489	0.810085242351251	0.912061427007349
ENSMUSG00000018752.18	0	NA	NA	NA	NA	NA
ENSMUSG00000018761.13	66.0339958234427	0.327064930262311	0.366909078823017	0.891405934438802	0.372711435186232	0.618836199988872
ENSMUSG00000018765.5	160.63017465746	0.325794760115857	0.302047223065424	1.07862193470751	0.280756298987381	0.527084267180325
ENSMUSG00000018770.8	115.626553321012	-0.22656926479433	0.308239589237971	-0.735042715812249	0.462313479737455	0.690940625266816
ENSMUSG00000018774.12	2.07011086769777	0.240875436326823	1.58496128833785	0.151975595933595	0.879206183673025	NA
ENSMUSG00000018776.9	0.136101049531713	0.482435301901315	4.03120216577034	0.11967529338959	0.904740372691678	NA
ENSMUSG00000018796.11	21.2085679718207	-0.519998158935549	0.5824728305875	-0.892742342009434	0.371995169711127	0.618720047918912
ENSMUSG00000018800.13	15.3915864568949	0.289779739046713	0.761403311854758	0.380586391646784	0.703510180600766	0.852664186554036
ENSMUSG00000018809.2	29.2385536920285	-1.02520000492316	0.501445972809692	-2.044487463283	0.0409054146580101	0.152619294857142
ENSMUSG00000018819.9	178.576823614426	-0.578289243010634	0.331111543285438	-1.74650885702319	0.0807225693839101	0.241074969447818
ENSMUSG00000018820.12	90.5285057878984	0.119635741247948	0.328412680131487	0.364284780965366	0.715645363309578	0.860491725887114
ENSMUSG00000018821.3	5.3882282994099	0.0400406612727855	1.03592618830352	0.0386520407774977	0.969167810724867	NA
ENSMUSG00000018822.7	0	NA	NA	NA	NA	NA
ENSMUSG00000018830.8	0.206713883009836	2.79199501225836	4.01367463718946	0.695620663017525	0.486666422381175	NA
ENSMUSG00000018841.16	34.6674596188161	-0.0573137797069585	0.456857347974854	-0.125452244471973	0.90016552966019	0.955468075153747
ENSMUSG00000018844.6	0	NA	NA	NA	NA	NA
ENSMUSG00000018845.13	0	NA	NA	NA	NA	NA
ENSMUSG00000018846.8	390.611084209804	-0.0793235821180073	0.231612913512149	-0.342483417332628	0.73198712136065	0.867799747164447
ENSMUSG00000018848.4	100.599267596909	0.654775703938854	0.30942290294181	2.1161190645994	0.0343346824372397	0.13495459465053
[truncated: 20,323 more rows]

## Sheet: Diff_Ribosome_density
	baseMean	log2FoldChange	lfcSE	stat	pvalue	padj
ENSMUSG00000000001.4	185.79510787748	0.60549157794425	0.317238721853337	1.90863074471778	0.0563097429146315	0.24883165736856
ENSMUSG00000000028.13	7.30147067211169	-0.359482296382666	1.07021506048867	-0.335897250612904	0.736948350420983	NA
ENSMUSG00000000056.7	14.9381280140988	0.220081170305142	0.781495351589288	0.281615456646766	0.778238387023514	NA
ENSMUSG00000000078.6	344.10889072274	0.0859676895081092	0.356917787958278	0.240861319913141	0.809662601878517	0.930537834803899
ENSMUSG00000000085.15	7.52457009364999	0.928424311059804	1.06705402117214	0.870081825885391	0.384255688864102	NA
ENSMUSG00000000088.6	100.071002913302	0.545219326952216	0.421269352442278	1.29422974586532	0.195586074988378	0.489766539851345
ENSMUSG00000000131.14	158.205595544161	-0.610579746363493	0.357714307361142	-1.70689215890675	0.0878420985026024	0.32201797855835
ENSMUSG00000000134.16	31.4748844004062	-0.844176732031458	0.555339197208906	-1.52011011697757	0.12848330233396	NA
ENSMUSG00000000142.14	21.8487263473369	-0.262131777713997	0.66898185056018	-0.39183690483456	0.695178724976005	NA
ENSMUSG00000000148.16	42.2995046562469	0.040277227315539	0.468164355248553	0.0860322381744665	0.931440789866681	0.980181394194509
ENSMUSG00000000149.9	17.5559587880791	-0.910461795125186	0.733794216242246	-1.2407590234053	0.214694782801472	NA
ENSMUSG00000000168.8	41.2677444238972	0.600504821186645	0.483038883417489	1.24318112226926	0.213801097508896	0.513278206545526
ENSMUSG00000000171.4	62.2124684430877	0.255593111218161	0.439968325208517	0.580935255048249	0.561284090429399	0.797844002582811
ENSMUSG00000000184.11	184.798160585587	0.604789515548953	0.873138769975522	0.692661391689099	0.488522073497464	0.750661711309772
ENSMUSG00000000194.12	47.9701932041927	-0.469259762563057	0.461474742956444	-1.01686987148362	0.309215337625707	0.614043699266182
ENSMUSG00000000244.15	23.9357072534283	-1.03024003267147	0.634400557232185	-1.62395827198874	0.104384714567097	NA
ENSMUSG00000000275.15	76.7561428323239	-0.275812299979389	0.430486216764352	-0.640699491037058	0.521717944918524	0.774107826064694
ENSMUSG00000000276.10	16.3542511390183	1.09947677876273	0.789810277519866	1.39207707224989	0.16389906034343	NA
ENSMUSG00000000278.10	17.2452731579883	-0.251662342193339	0.701292366624991	-0.358855099770269	0.7197034905206	NA
ENSMUSG00000000282.11	38.475814662344	-0.0725633898224311	0.566728077216421	-0.128039165059261	0.898117978870689	0.967869152871459
ENSMUSG00000000290.12	300.567497027457	0.7085307748081	0.301732596095404	2.34820759830692	0.0188640040427453	0.133962495353416
ENSMUSG00000000295.11	7.97806926036587	1.64504517787026	1.00410811367256	1.63831479446317	0.101356043050478	NA
ENSMUSG00000000303.11	2.64733902938148	-0.530399831788308	1.63199011747557	-0.325001864967635	0.745179660212382	NA
ENSMUSG00000000326.11	8.40785283183666	-2.08101839735679	0.93767819091428	-2.21933112822823	0.0264642053747464	NA
ENSMUSG00000000339.13	18.6002396069692	0.755620885122828	0.686630680723116	1.10047643709578	0.271124590569888	NA
ENSMUSG00000000340.9	18.9437401842689	0.214148941009231	0.681928981203114	0.31403408113175	0.753495154139211	NA
ENSMUSG00000000346.8	334.451889158838	0.133534444054177	0.323359496510032	0.412959710462793	0.679636132447015	0.86743279794771
ENSMUSG00000000355.12	19.6217523094022	-0.436313310153762	0.651036707260152	-0.670182349609687	0.502741554106349	NA
ENSMUSG00000000374.7	129.000184178298	-0.249027696161929	0.36372730757919	-0.684654935092305	0.493561692582486	0.754127276924526
ENSMUSG00000000378.14	154.42009487715	-0.61447173528644	0.372365407434517	-1.65018479971048	0.0989051447725521	0.346355469070825
ENSMUSG00000000384.14	44.5290761398336	-0.00815261900558205	0.597221038368822	-0.0136509239993439	0.989108476769712	0.997748865297947
ENSMUSG00000000399.9	69.5324391017553	0.36612634392075	0.391288640495503	0.935693771884386	0.349430878212972	0.647275257979078
ENSMUSG00000000409.13	343.177193996336	-0.879767848506773	0.294395780371414	-2.98838470917227	0.00280456288950766	0.03754862604822
ENSMUSG00000000420.14	60.9872159663428	-0.491843095126634	0.431392437711529	-1.14012915417754	0.254232497444158	0.562673649110956
ENSMUSG00000000439.9	23.4837321017039	0.147803161769425	0.630648116474853	0.234367086665705	0.814700008169877	NA
ENSMUSG00000000441.16	102.353660421108	-0.0653978636558434	0.375807273756754	-0.174019685681159	0.861849991336441	0.952592751850447
ENSMUSG00000000486.12	192.893976493764	0.0652744816277652	0.314189352651669	0.207755231286061	0.835420090092333	0.942684620448945
ENSMUSG00000000489.6	4.4444589582508	-0.0713769201758954	1.81009971924178	-0.0394325900485714	0.968545497006251	NA
ENSMUSG00000000530.15	3.63806697972524	1.24864476213533	1.41225708834578	0.884148341289551	0.376616140477569	NA
ENSMUSG00000000531.4	8.72398451572648	0.632969568974237	1.43741394339944	0.440353018614305	0.659681446473918	NA
ENSMUSG00000000532.10	22.3212833292091	-0.541591720001656	0.642232626580058	-0.843295244724138	0.399063341660356	NA
ENSMUSG00000000538.17	14.0849211773229	-0.698019159005028	0.789602830009138	-0.884012990425769	0.376689200383456	NA
ENSMUSG00000000555.6	10.6172818443172	0.373702882116995	0.84810557121282	0.440632504727669	0.659479067041108	NA
ENSMUSG00000000561.13	51.5914209719532	0.499528938254036	0.522240840136929	0.956510674506156	0.338814293991487	0.640440827205047
ENSMUSG00000000563.16	244.195745743775	0.4254814765136	0.309504424582938	1.37471855882818	0.169218715253755	0.455662281952308
ENSMUSG00000000568.14	183.233091310446	-0.414323842872785	0.360446441727863	-1.14947408243691	0.250360547782441	0.557191448977908
ENSMUSG00000000581.7	26.1652258492175	-0.0376926908101541	0.586397939978444	-0.0642783479279271	0.948748593646037	NA
ENSMUSG00000000594.7	41.7618457951334	-0.121370038642602	0.526507238735367	-0.230519221225001	0.817688329248173	0.932941168343065
ENSMUSG00000000600.14	58.887975803105	-0.0917922642578106	0.447850823913883	-0.204961695628054	0.837602052115784	0.943235576708995
ENSMUSG00000000605.8	63.0264410108696	-0.32296812363103	0.479137287119417	-0.674061761239082	0.500272048984367	0.759367924501739
ENSMUSG00000000627.14	3.81867552211894	-0.14099653359453	1.52958090476709	-0.0921798468816522	0.926555149721941	NA
ENSMUSG00000000628.9	10.8169574767575	1.1023033018027	1.2054255307054	0.914451597153121	0.360479600366803	NA
ENSMUSG00000000631.18	20.2963452722885	0.168021465454447	0.646491446919603	0.259897429819117	0.794942893877218	NA
ENSMUSG00000000682.7	144.90850330736	-0.9587240854019	0.507661730788269	-1.88850966550747	0.0589575615728516	0.254034493381531
ENSMUSG00000000708.13	36.0197026986143	-1.95099708115111	0.795466345589391	-2.45264566121341	0.0141809952078486	0.111208857156287
ENSMUSG00000000711.2	38.7922133364699	-0.144365927997844	0.516354852910024	-0.279586658640352	0.779794643923893	0.921739831123446
ENSMUSG00000000732.8	5.98871721045566	1.49420687468705	1.23033833468657	1.21446827475118	0.224568957459869	NA
ENSMUSG00000000738.16	58.7995511276151	-0.680274976807345	0.445262397199958	-1.527806931565	0.126560480767571	0.393650908811571
ENSMUSG00000000740.10	792.771478495954	2.7051061793572	0.320163475993096	8.44914046165445	2.93455244945103e-17	6.45461798286395e-15
ENSMUSG00000000743.8	60.9134190123606	0.107779291446788	0.419949018706746	0.256648513618868	0.797450120564453	0.92561399359444
ENSMUSG00000000751.12	243.64756549611	0.364307437644567	0.327308762538774	1.11303906079022	0.265691653954138	0.575084231309354
ENSMUSG00000000759.13	67.4545827360751	-0.412120494516901	0.479344563766149	-0.859758356867391	0.389922258857185	0.679641854211825
ENSMUSG00000000776.11	30.0177279415741	0.687783182736158	0.588459997696088	1.16878493938235	0.242490289756723	NA
ENSMUSG00000000782.14	706.177881859367	-1.00020049385429	0.297845707515677	-3.35811619444488	0.000784756177897424	0.0144991551428328
ENSMUSG00000000787.11	456.481945382359	0.952227247158258	0.289836359904712	3.28539610237762	0.0010183909341348	0.0176177817407065
ENSMUSG00000000791.8	4.10091088400205	0.739099164615709	1.36853940129716	0.540064220230093	0.589152744616573	NA
ENSMUSG00000000804.13	53.3757363373975	-0.904639288974222	0.459935877531155	-1.96688132665394	0.0491968937957935	0.234287195057976
ENSMUSG00000000811.12	10.8935185321549	0.415410900911064	0.882134424072773	0.470915644571642	0.637700975541273	NA
ENSMUSG00000000817.10	29.3148072075854	2.21359806078165	0.607090053379738	3.6462433348369	0.000266102006725272	NA
ENSMUSG00000000823.15	26.9269605609762	-1.60911614057162	0.61243748058026	-2.62739657776504	0.00860409924243386	NA
ENSMUSG00000000826.15	51.26240596932	0.330041627792744	0.434422814080566	0.759724436874385	0.447419318551024	0.722314233315408
ENSMUSG00000000827.17	60.8566799678581	0.446111086495616	0.424022938537275	1.05209187039394	0.29275740163435	0.600464670581289
ENSMUSG00000000838.16	60.4776274544988	0.0643328891685339	0.425873707186771	0.151060955590574	0.879927631915486	0.961984788595889
ENSMUSG00000000869.11	5.57488505218281	2.120135042423	1.46525680284405	1.44693751860277	0.147914423872578	NA
ENSMUSG00000000876.10	5.0382307968022	0.569717660132491	1.22534978840119	0.464942880412821	0.641972361766574	NA
ENSMUSG00000000881.11	2.22337454399753	0.546902137678415	1.74649822490377	0.313142109095787	0.754172698246088	NA
ENSMUSG00000000884.15	3.98497788464112	0.175101897449562	1.31878720832513	0.13277494378486	0.894371370847347	NA
ENSMUSG00000000901.14	1.81850481137558	2.29251606129499	1.96263898962374	1.16807832383606	0.242775172922708	NA
ENSMUSG00000000902.12	60.1813452497057	-0.0635922213004709	0.424453294432637	-0.1498214812668	0.880905461045384	0.962142900110813
ENSMUSG00000000915.14	45.5632634200638	0.434514536683925	0.499303305413993	0.870241658672079	0.384168354317814	0.677797413519474
ENSMUSG00000000916.14	32.7783686626604	-0.0628295145944505	0.556913473758101	-0.112817372096372	0.910175345332147	0.971821525679424
ENSMUSG00000000934.8	6.01191967517309	3.14680865697397	1.57186516445158	2.00195839194127	0.0452892066865216	NA
ENSMUSG00000000957.9	1.75681822320465	0.0050250899266766	1.98152724991629	0.00253596811595142	0.997976592362395	NA
ENSMUSG00000000959.6	36.0771583685058	0.470084232165187	0.571733387158953	0.822208817471936	0.410958061266901	0.697873266541109
ENSMUSG00000000976.12	52.227826358915	-0.168332904066609	0.465335363339834	-0.361745350403717	0.717542334137219	0.890150800339133
ENSMUSG00000000982.5	14.7961114193895	-0.428836391874944	1.6007716483508	-0.267893545164142	0.788781262376291	NA
ENSMUSG00000001016.11	96.3164705192967	0.990993248646049	0.355726679269976	2.78582773347158	0.00533912373530596	0.0618080514621009
ENSMUSG00000001017.14	104.787605759878	0.255559792578557	0.355939819169261	0.717985959466451	0.472765944091607	0.740722366867328
ENSMUSG00000001018.14	16.4256653149439	-0.5828950267195	0.77422618060491	-0.752874342564957	0.451525427478335	NA
ENSMUSG00000001020.8	11.5115576117685	0.67332673162963	0.862197988558267	0.780942127637691	0.434836533155248	NA
ENSMUSG00000001025.7	9.97201078657893	0.355120041332096	1.05044212820492	0.338067211697757	0.735312538619942	NA
ENSMUSG00000001029.14	47.1585472789546	-0.0721826362973501	0.457764708891501	-0.157685017860254	0.874705006801907	0.959306142562437
ENSMUSG00000001034.16	26.2956613618494	-1.74317544512548	0.570580897592949	-3.05508903729382	0.00224993716613633	NA
ENSMUSG00000001052.14	149.666603503911	-0.543938175918562	0.349697898179205	-1.55545165913413	0.119838539019842	0.385469506777612
ENSMUSG00000001053.14	7.40097133056563	0.806220619124331	1.10321246717683	0.730793607860039	0.464905228512297	NA
ENSMUSG00000001054.8	31.2821677889272	-0.0603982478437424	0.56398711706779	-0.107091538114837	0.914716360167933	NA
ENSMUSG00000001056.3	41.1189842915786	0.39336637539984	0.519686296101145	0.756930437363852	0.449091538983941	0.722314233315408
ENSMUSG00000001062.16	10.9023743868074	-0.238725973362996	0.884662422209765	-0.269849795096633	0.787275812382471	NA
ENSMUSG00000001065.13	29.6621089854389	0.238046947517102	0.623187476324074	0.381982880851911	0.702474062672828	NA
ENSMUSG00000001082.11	20.1907915643708	0.107093862588214	0.681601844765645	0.15712085202034	0.875149604152812	NA
ENSMUSG00000001089.13	8.00093050852656	-0.159972259160267	1.10012051610564	-0.145413395003812	0.884384489387088	NA
ENSMUSG00000001098.14	92.1772732088222	0.481672703640946	0.366785227774941	1.31322819777382	0.189106065002123	0.480462549089552
ENSMUSG00000001100.9	27.3151871359451	0.801440447170421	0.598277653281316	1.33957944572196	0.180382109905492	NA
ENSMUSG00000001105.14	5.09006143304349	1.11792863007446	1.21321794223369	0.921457383012494	0.356811681402263	NA
ENSMUSG00000001120.14	4.59748090452252	-1.05169744122693	1.32985013722608	-0.790839066588853	0.429037909526797	NA
ENSMUSG00000001123.14	63.1473012950025	0.433531897488209	0.439013124719027	0.987514662040399	0.323390398707525	0.625924571809496
ENSMUSG00000001127.11	39.3173837402812	-0.877582502269381	0.48799291156327	-1.79835092165186	0.0721214149466598	0.286439222389185
ENSMUSG00000001128.7	2.61756219216749	-0.177507554479477	1.64157028095869	-0.10813277782771	0.913890367639276	NA
ENSMUSG00000001134.8	25.0485587284144	-0.286291475856963	0.695671217366224	-0.411532730850714	0.680681946055123	NA
ENSMUSG00000001138.12	32.1099063496207	0.0993815028536966	0.53598641342785	0.185417951582227	0.852901229218628	0.949060654724366
ENSMUSG00000001143.12	3.12400466884285	-1.78422453665872	1.51486901181351	-1.1778077990537	0.238873238729538	NA
ENSMUSG00000001150.6	88.9597340162542	-0.305816332038161	0.406984377311361	-0.751420322466575	0.452399735975546	0.723870514142559
ENSMUSG00000001151.9	128.783711498361	-0.0729595136240662	0.418761608057209	-0.174226844630176	0.861687189203002	0.952592751850447
ENSMUSG00000001156.8	41.990571923829	1.77377808751049	0.505600696170649	3.50825879185857	0.000451050048735365	0.00934260168210158
ENSMUSG00000001157.12	16.0734014855732	-1.14948698966646	0.739174724667678	-1.55509509633633	0.119923422660939	NA
ENSMUSG00000001158.12	14.4513335427971	0.172028075503491	0.747249831087095	0.23021494063535	0.817924752683705	NA
ENSMUSG00000001173.14	5.91896371154219	-1.53060841110466	1.26972981641677	-1.20545992644648	0.22802579923586	NA
ENSMUSG00000001175.12	344.829722340302	0.00551300225230729	0.297626095873366	0.0185232488976805	0.98522143080779	0.997105475057845
ENSMUSG00000001211.13	30.8453286699456	-1.10136552770967	0.587598182033061	-1.87435148948044	0.0608819950353836	NA
ENSMUSG00000001228.13	15.937535701471	0.139350701710913	0.755076180530388	0.18455184430931	0.853580559670534	NA
ENSMUSG00000001229.7	42.4403988628342	-0.888708068750953	0.489047825937427	-1.81722118291282	0.0691832527076851	0.27993015806078
ENSMUSG00000001248.13	272.160063010313	0.127655564403112	0.304361181318672	0.41942130678437	0.674908255113145	0.866908017343609
ENSMUSG00000001270.8	12.1670176038607	0.570641486363814	0.821538828871041	0.694600749605457	0.48730554235581	NA
ENSMUSG00000001280.11	228.600250683266	-0.252120401384527	0.284809878733236	-0.885223512983105	0.376036093158513	0.672960369740089
ENSMUSG00000001281.8	212.636088161101	-0.087704125778479	0.3132067510398	-0.280019908534265	0.779462230852956	0.921739831123446
ENSMUSG00000001285.11	46.1873030789978	-0.263201117000375	0.481767923932222	-0.546323455601009	0.5848436157858	0.812646018102784
ENSMUSG00000001288.13	10.1840199921805	-1.24041612183331	0.895936915112392	-1.3844904712713	0.166208323786764	NA
ENSMUSG00000001289.11	160.820818446201	1.15082882107103	0.319247853577004	3.60481302591889	0.000312377739039852	0.00690369749581375
ENSMUSG00000001305.5	33.7251440945408	0.98969479733923	0.577502259232512	1.71375052048197	0.0865745541427609	0.319709301330885
ENSMUSG00000001348.13	26.4337164669194	-0.595882818326793	0.581287515194728	-1.02510857837223	0.305311958309745	NA
ENSMUSG00000001366.13	21.4805127065218	-0.308614104831223	0.746214336471824	-0.41357300409207	0.679186847227745	NA
ENSMUSG00000001376.16	33.9550049984162	0.039542812211362	0.536636662695799	0.0736863784384733	0.941259937752727	0.982570098566165
ENSMUSG00000001380.6	82.7712456112536	1.05320727749657	0.399909380351166	2.63361483687062	0.0084481261814581	0.0824987205753804
ENSMUSG00000001383.8	52.7974722785172	-0.438210264308587	0.496360662135455	-0.882846481877328	0.37731922255095	0.673951078485243
ENSMUSG00000001403.12	5.2864738565176	-2.619609904255	1.68368676767597	-1.55587722998554	0.119737288871256	NA
ENSMUSG00000001415.9	101.50836388656	-0.209080283832308	0.390860767307017	-0.534922666382829	0.592703333960167	0.817955392758295
ENSMUSG00000001416.12	383.85080696283	0.718602131469173	0.259659354960324	2.7674802303155	0.00564914716256099	0.0631801712926615
ENSMUSG00000001418.12	60.640540916258	-0.653029168959971	0.472332267500744	-1.38256311053096	0.16679886678654	0.453469079274295
ENSMUSG00000001419.16	87.4605720812874	-0.733477623661959	0.476638518022077	-1.53885511961076	0.12383966992802	0.391624154394741
ENSMUSG00000001424.13	125.963210501024	-0.0168731211166022	0.330627740420828	-0.0510335917219946	0.959298753090079	0.990610538905226
ENSMUSG00000001436.14	27.5734608571897	-1.29573233754086	0.667184091363881	-1.94209117740215	0.0521260633841483	NA
ENSMUSG00000001440.5	403.132323988094	0.341477433500637	0.280454541086984	1.21758568136262	0.223381458385544	0.524153948560615
ENSMUSG00000001441.12	91.3126366470125	-0.642544751311869	0.371920611337248	-1.72763953307558	0.0840528705106145	0.314439773151681
ENSMUSG00000001444.2	73.7597984744506	2.3493247008543	0.736330741640795	3.19058348103083	0.00141985814393797	0.0230422121527526
ENSMUSG00000001445.9	37.6397104265939	0.125298864518505	0.50331189298215	0.248948745828561	0.803400428265394	0.927506810282024
ENSMUSG00000001467.5	96.0664390647891	1.07756254677364	0.38980568783622	2.76435819280908	0.00570348919037141	0.0635596561018081
ENSMUSG00000001472.15	299.272009753782	0.514447779475806	0.280898256706857	1.83143813531275	0.0670351736411777	0.275145352951549
ENSMUSG00000001482.13	5.57457385098787	0.272192815864539	1.12726414485379	0.241463207276803	0.809196129252674	NA
ENSMUSG00000001507.15	8.2108483692043	-1.19945628799261	0.983878415518308	-1.21911027732094	0.22280233966339	NA
ENSMUSG00000001517.13	3.98160179164768	-0.37517325407068	1.39201238930865	-0.269518617041197	0.787530617757914	NA
ENSMUSG00000001518.11	16.6649559405779	0.491205481772657	0.791187849780069	0.620845582890588	0.534701228257993	NA
ENSMUSG00000001521.11	3.3813809448282	-1.66963604195661	1.64224959726865	-1.01667617683299	0.309307502391644	NA
ENSMUSG00000001524.13	12.0009256560289	0.116036578446301	0.820753999182374	0.141378023819433	0.887571314334087	NA
ENSMUSG00000001525.10	448.192323249756	0.161455164625049	0.274426585393641	0.588336455790009	0.556306480446124	0.793575685479656
ENSMUSG00000001542.6	19.757366980133	1.36820213793205	0.70770615885958	1.9332912689877	0.0532003267774722	NA
ENSMUSG00000001552.13	12.3424583493354	-0.385075675748053	0.900031084879322	-0.427847084636731	0.668762454306516	NA
ENSMUSG00000001569.10	66.5909563700183	0.665009773814546	0.41525184897383	1.60146131909567	0.109274780737501	0.366550626163047
ENSMUSG00000001576.13	14.5596826221739	0.505539950274311	0.755705939449332	0.668963844114667	0.503518542124754	NA
ENSMUSG00000001588.11	82.062442079782	0.529899916007249	0.392903223402342	1.34867795539722	0.177440429230609	0.465224307918515
ENSMUSG00000001627.10	150.180693497631	1.52433031760721	0.364943765723105	4.17689096452129	2.9552059433597e-05	0.000996357390684559
ENSMUSG00000001630.12	12.2420031735231	1.42226256573658	0.796497480574597	1.78564603206347	0.0741565886537195	NA
ENSMUSG00000001632.15	79.0647200545044	0.321904945014353	0.428362467666216	0.751477940558472	0.452365071778722	0.723870514142559
ENSMUSG00000001642.17	176.509576822236	0.0659216881776548	0.308997525943426	0.213340504835383	0.831061382396399	0.94015981515772
ENSMUSG00000001666.8	6.73576030783645	-3.54400629789593	1.60986720349551	-2.20142772658565	0.0277057579416071	NA
ENSMUSG00000001674.10	194.793892729638	0.838158261391203	0.309977005735676	2.70393689171228	0.00685233018274118	0.0714467564651953
ENSMUSG00000001687.14	38.1897086146807	-1.3071913639802	0.507508447458006	-2.57570365681127	0.0100036342271342	0.0908361569785052
ENSMUSG00000001700.9	176.452553598988	-0.451569767755738	0.323482709281527	-1.39596261190807	0.162725754275619	0.447132813205881
ENSMUSG00000001707.7	62.3139473328647	0.896441861125912	0.508819178161194	1.7618083193435	0.0781016886641453	0.302109202102264
ENSMUSG00000001729.13	36.1042061335453	-0.792929366998128	0.544913977159843	-1.45514595006531	0.145628860499395	0.422790513291456
ENSMUSG00000001741.10	604.785931819785	-0.499168214178652	0.278121118847564	-1.79478716412126	0.0726876166701301	0.287698458782632
ENSMUSG00000001750.14	25.9163085425695	1.26026964564254	0.609427984055515	2.06795499815403	0.0386442549793707	NA
ENSMUSG00000001751.9	10.4167135571455	-0.707251111392735	0.914755478562802	-0.773158650554263	0.439428494118276	NA
ENSMUSG00000001755.11	8.44044801493654	-0.132918971811477	0.934899245570957	-0.142174648702708	0.886942055757492	NA
ENSMUSG00000001767.5	98.5505292787634	0.414270746420877	0.380489854022073	1.0887826364927	0.276249750362953	0.585378929221051
ENSMUSG00000001768.14	3.09618159670779	-0.386646906151443	1.57229779130734	-0.24591200743846	0.805750348611849	NA
ENSMUSG00000001774.7	83.877505196078	0.246213568334357	0.385947335844252	0.637946023894087	0.523508816759535	0.775276442645813
ENSMUSG00000001783.3	132.779628594548	0.885887727140514	0.338146950586444	2.61983059614801	0.00879734561734293	0.0846322271382985
ENSMUSG00000001785.10	81.0981720498137	0.80119067549617	0.386288644769479	2.07407255259674	0.0380725732369944	0.201107229925383
ENSMUSG00000001786.13	32.9853491372376	-0.181138672349193	0.525857948898741	-0.344463124934284	0.730498023137766	0.898297919278096
ENSMUSG00000001794.11	117.436220507441	-0.0629212534253444	0.354026516245263	-0.17773034091535	0.858934755983087	0.951257725281637
ENSMUSG00000001829.15	25.6385994051344	-0.0956081250763517	0.581082672315833	-0.164534462360265	0.869310419371365	NA
ENSMUSG00000001833.15	447.417518779938	0.279504562453219	0.264597715190032	1.05633777771845	0.290813922335287	0.599507049695211
ENSMUSG00000001844.9	11.7829344087008	-0.358292125440784	0.86841916962308	-0.412579705715494	0.679914572551609	NA
ENSMUSG00000001847.13	192.363718972001	0.00215904553434122	0.322581458161442	0.00669302428802552	0.994659779126136	0.999562367386686
ENSMUSG00000001855.14	108.751200679065	-0.104682836591291	0.406228015552358	-0.257694773830288	0.796642479801486	0.92561399359444
ENSMUSG00000001865.2	0.996027442570232	-2.70999922000923	2.79830517316023	-0.96844305832045	0.332823143968267	NA
ENSMUSG00000001891.15	37.3256947302326	0.218230955422915	0.514764166957156	0.423943563735039	0.671606972369144	0.865776010913499
ENSMUSG00000001909.14	53.971852199503	1.1758046954144	0.512136436634397	2.29588174421142	0.0216826438336116	0.145148017199206
ENSMUSG00000001910.4	55.9980074169522	-0.197922977126817	0.472996490913673	-0.418444916461209	0.675621852248096	0.867048658062295
ENSMUSG00000001911.15	10.3812475344345	0.319849356919381	0.85608412998221	0.373619070506572	0.708687743624903	NA
ENSMUSG00000001918.16	194.325532679206	-0.612467690898292	0.351432329140725	-1.74277560745711	0.0813728187345219	0.309148964419268
ENSMUSG00000001924.14	717.847659178517	-0.208471209446166	0.258065601441355	-0.807822539237336	0.41919274803229	0.7015403272323
ENSMUSG00000001942.7	5.68226906607113	-0.134103734206847	1.14689272635047	-0.116927879239045	0.906917205249261	NA
ENSMUSG00000001962.8	31.7981460496111	-0.872447871997314	0.607205749254978	-1.43682412932977	0.150767972371163	0.429344799249324
ENSMUSG00000001964.13	78.9831673379792	-0.0376157519916587	0.425154926898912	-0.0884753994644461	0.929498836032145	0.97949818217938
ENSMUSG00000001983.7	7.97116790643359	0.316979153645464	1.03637991158574	0.305852274925382	0.759717124738117	NA
ENSMUSG00000001986.15	4.03473336219627	-1.23383690862342	1.39868754999764	-0.882139051445404	0.377701616438414	NA
ENSMUSG00000001995.8	34.57477347294	-0.0122308250172386	0.63569206155018	-0.019240172651225	0.984649510385147	0.997105475057845
ENSMUSG00000001998.14	34.4782935401142	0.467561156071838	0.54076188911247	0.864634075524862	0.387239663491176	0.678768725988727
ENSMUSG00000001999.14	15.299076428538	-0.0738812710090852	0.7233639410345	-0.102135684152884	0.91864897724747	NA
ENSMUSG00000002010.16	141.026703959911	-0.225258660723133	0.366072804512404	-0.615338418878642	0.538331250581347	0.783165998877241
ENSMUSG00000002014.11	66.0249705418594	0.536468570890819	0.428174698964378	1.25291982965918	0.210234884492586	0.510056742925292
ENSMUSG00000002015.5	106.624558267295	-0.0512538671087417	0.365330064083755	-0.140294687318674	0.888427161717918	0.963062061143215
ENSMUSG00000002017.9	32.9822214375752	0.402107139780655	0.605884609762674	0.663669506208716	0.506901860419929	0.764656986701389
ENSMUSG00000002028.11	264.964085411165	-0.808929510155115	0.368775138025527	-2.19355760935033	0.0282672287330035	0.169787164522423
ENSMUSG00000002031.10	16.4022464513438	-0.0697639252093348	0.745274745306276	-0.0936083312210785	0.925420291320338	NA
ENSMUSG00000002033.12	327.35408800307	0.0972281692918364	0.33901210511655	0.286798517883042	0.774266597850041	0.919497664994328
ENSMUSG00000002043.15	9.07756003976641	-0.562851254240648	0.945227857016753	-0.595466214905124	0.551531876032829	NA
ENSMUSG00000002052.6	218.8967126172	-0.158126934003604	0.3455682406847	-0.457585262147632	0.647250433742894	0.851567374995649
ENSMUSG00000002055.8	5.3077057588069	-0.612230726171047	1.24951699789184	-0.489973907681119	0.6241523625232	NA
ENSMUSG00000002058.12	2.38993694924165	1.39491895200943	1.7917764801985	0.778511699101493	0.436267412405017	NA
ENSMUSG00000002064.10	34.2893286168498	-0.58226552124259	0.556196213197904	-1.046870703946	0.295159215215678	0.602689387323741
ENSMUSG00000002083.11	19.459664350372	-0.391296672137141	0.795003163213261	-0.492195113483058	0.622581418549913	NA
ENSMUSG00000002102.14	149.247589689706	0.257660963052666	0.313303364510603	0.82240088118794	0.410848778011447	0.697873266541109
ENSMUSG00000002103.14	11.266758695634	-0.22068254199847	0.823022919257172	-0.2681365692679	0.78859419792057	NA
ENSMUSG00000002105.14	2.89886272249526	-0.446473438326971	1.55057071359505	-0.287941358889597	0.773391627142301	NA
ENSMUSG00000002107.17	118.678128084825	-0.112083798900844	0.343445981301746	-0.326350590785832	0.744159115633915	0.90478308900054
ENSMUSG00000002109.13	51.2692543278207	-0.20031633538308	0.462675908714407	-0.432951730596217	0.66504983724553	0.862883482650872
ENSMUSG00000002129.10	115.807560121174	0.13380097485305	0.391420445592716	0.341834404307725	0.73247551663061	0.899336632460602
ENSMUSG00000002147.17	288.941657771618	-1.02748495155978	0.360927095268213	-2.84679361851798	0.00441619824788739	0.0535391593359367
ENSMUSG00000002205.14	33.8583460105543	-1.23045849129057	0.545963459916986	-2.253737807797	0.024212667374559	0.155980907396218
ENSMUSG00000002210.10	32.8622108550366	-0.267365190885803	0.519858369141147	-0.514303908057717	0.607039529815422	0.826681497260544
ENSMUSG00000002221.10	38.4813408349413	-0.133436991807377	0.51914651658665	-0.257031469044067	0.797154480164667	0.92561399359444
ENSMUSG00000002222.13	55.695842347449	0.315870396464694	0.462091400528207	0.683566922266091	0.494248677924584	0.754532548705588
ENSMUSG00000002227.14	25.4721978970323	-0.0591162517102232	0.594065063522932	-0.0995114093389894	0.92073222952187	NA
ENSMUSG00000002228.7	4.37177157254763	0.530811818654125	1.46170519418907	0.363145606080036	0.716496117912648	NA
ENSMUSG00000002233.12	1.36134146142423	-2.26495161999112	2.48864155732404	-0.91011564655641	0.362761523764747	NA
ENSMUSG00000002250.14	12.3118608619175	0.101012498656542	0.922468241459781	0.109502413326113	0.912804007723847	NA
ENSMUSG00000002257.7	141.578433053877	-0.0552941389500504	0.315290770618429	-0.175375063601112	0.860784933280866	0.952095627978968
ENSMUSG00000002274.11	4.00112025428317	1.56768574997378	1.46175068262469	1.0724713650613	0.283508368832171	NA
ENSMUSG00000002279.17	13.5784297582254	0.221698090428235	0.761867602712596	0.290992935831487	0.771056722237505	NA
ENSMUSG00000002280.9	19.330523937897	0.301763576287881	0.642265425609379	0.469842473618393	0.638467566556814	NA
ENSMUSG00000002289.14	2.01542203305284	-0.11564926904672	1.77446838240003	-0.0651740375843161	0.948035432175338	NA
ENSMUSG00000002297.14	30.9821953892966	0.740555718050238	0.593603100363375	1.24756039447386	0.212192090101136	NA
ENSMUSG00000002307.14	75.8866902531711	0.0165717313587869	0.411920685004276	0.0402303937677102	0.967909446515472	0.993063912362276
ENSMUSG00000002308.14	11.6803414683076	1.9550602681206	0.859904081904934	2.27357947154941	0.0229912828944274	NA
ENSMUSG00000002319.14	93.9483602817078	0.282062249219718	0.49665007594735	0.567929540092569	0.570082812645704	0.802319473373098
ENSMUSG00000002320.14	42.106315764394	-0.709399538560189	0.481513615666524	-1.47326994601849	0.140678261154091	0.414408729764508
ENSMUSG00000002325.13	116.329377062531	0.122030021919872	0.338895126988358	0.360081961060667	0.718785842248699	0.890737691210079
ENSMUSG00000002326.5	17.3483011746176	0.0103164425456336	0.692290897312439	0.0149018896329323	0.988110452381394	NA
ENSMUSG00000002329.6	30.8988348664121	0.125386686592	0.532318256223541	0.235548349368175	0.813783156906489	NA
ENSMUSG00000002332.14	11.0418126349825	-0.492245689153556	0.819348888677101	-0.600776660536298	0.547988751336821	NA
ENSMUSG00000002342.16	25.8227431263388	-0.189929500132137	0.570209904171098	-0.333086989094363	0.739068620363802	NA
ENSMUSG00000002343.10	8.47592715522513	-1.16536740675398	1.01278241374883	-1.15065920471541	0.249872465862373	NA
ENSMUSG00000002365.9	22.7069562786841	0.244382037368215	0.642678707860956	0.38025538170013	0.703755852534499	NA
ENSMUSG00000002372.8	90.8185490255465	-0.0345733997138818	0.3755568859036	-0.0920590222455839	0.926651145657948	0.979081042151265
ENSMUSG00000002379.6	58.9527447352799	-0.13412763980673	0.468756705973693	-0.28613487145346	0.774774824022066	0.919497664994328
ENSMUSG00000002395.13	107.112527911861	0.988076784070346	0.371250356205078	2.66148373343118	0.00777970998566355	0.0782886283742482
ENSMUSG00000002396.8	5.68256681954372	-0.321349601954364	1.41579768782501	-0.226974238422461	0.820443774172819	NA
ENSMUSG00000002409.16	12.4631551612258	-2.07988071827732	0.8874000471528	-2.34379153455148	0.0190888373676075	NA
ENSMUSG00000002413.14	46.3862993896878	0.226212350401148	0.468638533184824	0.482701131859197	0.629307959471052	0.839137836257733
ENSMUSG00000002416.12	33.322446823762	0.40599503940854	0.563057548630104	0.721054251730234	0.470876136523738	0.739093322174101
ENSMUSG00000002428.11	52.0997572779641	0.128012519615327	0.478496363044543	0.267530810058445	0.789060495379084	0.924348505662345
ENSMUSG00000002455.13	124.541430732212	0.0584746175328825	0.362584401068091	0.161271740760578	0.871879379502878	0.957264286646967
ENSMUSG00000002458.12	41.2672018787463	-0.118131950411551	0.476650661586091	-0.24783758826319	0.804260070777274	0.927506810282024
ENSMUSG00000002477.4	59.0122978517443	0.679157283353881	0.458001983327291	1.48286974309574	0.138109021696764	0.411806260091057
ENSMUSG00000002486.14	3.07956089582128	-1.28077257863917	1.53872502411515	-0.832359621483173	0.405205986505657	NA
ENSMUSG00000002489.14	63.6521225648023	-0.75371083416516	0.419290913032307	-1.79758447115949	0.0722428810076513	0.28667514379239
ENSMUSG00000002496.9	48.5383861214932	-1.02182691247618	0.480507687019159	-2.12655684826835	0.0334569211101551	0.188371013819417
ENSMUSG00000002524.14	296.640946497367	0.0761230338930665	0.277994408230583	0.27382937080492	0.78421575133944	0.923586883247612
ENSMUSG00000002546.15	47.3192108055483	-0.154504873824893	0.459496171503502	-0.336248446465491	0.736683522511869	0.901589607503789
ENSMUSG00000002550.15	23.8987776558206	-0.163855934055768	0.599581706602781	-0.273283744736265	0.784635109740145	NA
ENSMUSG00000002565.15	5.18548375260046	1.29624195686456	1.19598060962084	1.08383191703711	0.278439330904732	NA
ENSMUSG00000002578.14	21.1187186908796	-0.974618707739468	0.623768786638984	-1.5624679025556	0.118177801601348	NA
ENSMUSG00000002580.7	20.0840491985873	-0.660930928961819	0.706090485828474	-0.936042819195236	0.349251141803174	NA
ENSMUSG00000002602.15	7.8021948653304	-0.496423022007911	0.96710634193645	-0.513307586230813	0.607736178168703	NA
ENSMUSG00000002603.14	147.716322389843	-0.395022834178649	0.491996705056528	-0.802897316422604	0.422034087261709	0.70451896378846
ENSMUSG00000002608.7	34.4869532860423	-0.51631148472265	0.536058501572375	-0.963162571264512	0.33546594504773	0.637577543027295
ENSMUSG00000002617.13	4.89750658075473	0.744259657556913	1.44054505260645	0.516651427326266	0.605399508882081	NA
ENSMUSG00000002625.9	48.4587178752929	0.111410918714145	0.494181264620937	0.22544545228683	0.821632755785422	0.934858185113321
ENSMUSG00000002635.10	27.0212997523661	0.854029555697631	0.581002100991556	1.46992507297326	0.141582048046395	NA
ENSMUSG00000002658.9	72.3701574758059	1.2710530212162	0.391270869316279	3.24852454116321	0.00116005201523058	0.0195557673662411
ENSMUSG00000002660.7	32.4289134289908	0.344042245996417	0.554990547447325	0.619906496748165	0.535319348263844	0.781891233297586
ENSMUSG00000002661.13	12.0743040297896	0.252624970884191	0.789232696058109	0.320089337588202	0.748900608175356	NA
ENSMUSG00000002668.7	32.2248258072459	-0.699983965271026	0.555413854075722	-1.26029259107317	0.20756383171356	0.507000179103615
ENSMUSG00000002679.13	15.7409271886607	1.35713810064447	0.739945911911152	1.83410446466178	0.0666384888228001	NA
ENSMUSG00000002699.11	619.426970014338	-0.0332817151757127	0.326461958217893	-0.101946687318157	0.918798991860798	0.975705917398465
ENSMUSG00000002718.13	171.525026238894	0.476031631834232	0.310360228221743	1.53380358869346	0.125077979871027	0.392030668607666
ENSMUSG00000002728.13	39.936852945509	1.10102357750839	0.502360103338336	2.19170186922042	0.0284010406881063	0.169927988262128
ENSMUSG00000002731.6	3.01393061619763	0.174352626289061	1.57645622388763	0.110597822918988	0.91193527395493	NA
ENSMUSG00000002733.8	14.7773032423799	1.67019310804862	0.88908614709144	1.87855036715227	0.0603059136160435	NA
ENSMUSG00000002741.9	34.6604837404261	-0.164029633714723	0.516900206940573	-0.317333271514014	0.750990733948527	0.907559514693679
ENSMUSG00000002748.7	152.529941546203	-0.260556637054376	0.349627762726823	-0.745240123445112	0.456126571023639	0.726750131617175
ENSMUSG00000002763.15	27.078659060541	-0.498566478323191	0.571427613247943	-0.872492800075559	0.382939594293806	NA
ENSMUSG00000002767.12	25.8155616056798	0.241143681123851	0.573384061027105	0.420562233090137	0.674074776685967	NA
ENSMUSG00000002768.7	48.6372189981851	-0.280152705839018	0.46345691214848	-0.604484901390929	0.545521304481112	0.786738339767451
ENSMUSG00000002778.11	35.9519902926368	-0.379032983496029	0.534742981008354	-0.708813386912147	0.478440289250471	0.744079358938696
ENSMUSG00000002781.16	5.80432260174932	-1.84054621104282	1.28574680343316	-1.43149973706195	0.152287042282817	NA
ENSMUSG00000002797.8	3.48188683663366	1.51331894723296	1.42818840599198	1.05960736054418	0.289323263605901	NA
ENSMUSG00000002803.12	31.4155459115861	-0.720341654246981	0.530749749610024	-1.35721525026863	0.174712826474422	NA
ENSMUSG00000002804.3	7.10314631198995	-1.79921018745534	1.0892020619311	-1.65186079823007	0.0985629311717911	NA
ENSMUSG00000002812.4	290.103234859259	-0.132157155405602	0.282131843419549	-0.468423393133527	0.639481842339597	0.846519647464589
ENSMUSG00000002814.14	37.0764120545253	-0.388051174453494	0.550228246499099	-0.705254913615435	0.480651613053999	0.745510342745608
ENSMUSG00000002820.5	18.3814362546729	0.072918179964046	0.726941107174294	0.100308235762712	0.920099619278732	NA
ENSMUSG00000002825.6	24.343372386714	1.16161738945352	0.68948714596226	1.684755685811	0.0920357178718465	NA
ENSMUSG00000002833.10	48.2031599119397	-0.550081829415413	0.449295882171536	-1.22431976620119	0.220831623217957	0.522508503349081
ENSMUSG00000002835.8	3.8992179264044	0.941956736491594	1.38222574055575	0.681478219406376	0.495568943952272	NA
ENSMUSG00000002844.8	53.3524254537667	-1.00680749151043	0.447988308083851	-2.24739680331565	0.0246146791296504	0.156932251079818
ENSMUSG00000002845.13	12.9476496502656	0.487044478914344	0.802621000584024	0.606817512325179	0.543972024918654	NA
ENSMUSG00000002846.9	12.786769604176	-1.10723545850742	0.819629752610316	-1.35089710321172	0.176728396298929	NA
ENSMUSG00000002870.8	91.4485962255625	0.177163319583718	0.379273928337143	0.467111779500527	0.640419906898768	0.846779838827261
ENSMUSG00000002871.13	24.9403277069168	-0.1219971960475	0.633725606740912	-0.192507916280833	0.847344367588122	NA
ENSMUSG00000002881.13	98.019748961504	0.859613017506944	0.371991121583692	2.31084283368722	0.0208415376094481	0.142617869952653
ENSMUSG00000002885.13	394.651547306724	-0.521387053086649	0.265413872898609	-1.96443029670053	0.049480212260962	0.234310517022375
ENSMUSG00000002897.4	292.389094131362	0.188714209905647	0.295520897145302	0.638581608707218	0.523095148714583	0.774912280921314
ENSMUSG00000002910.10	13.325059085054	-0.367862380696258	0.832663039335929	-0.441790212028191	0.658641022094805	NA
ENSMUSG00000002948.17	52.6961617711399	-0.552907069462211	0.43369859693785	-1.27486478712645	0.202357104510537	0.499502644137921
ENSMUSG00000002949.13	47.8203245293938	0.680723415955614	0.452561263233971	1.50415749481344	0.132540819213042	0.403897057108949
ENSMUSG00000002957.10	102.186279820053	-0.511293245012123	0.355475183577628	-1.4383373822788	0.150338350085179	0.428385465171771
ENSMUSG00000002963.15	46.9485568917576	-0.438949652595603	0.445839364539315	-0.984546649552062	0.324846806434803	0.627810627164165
ENSMUSG00000002968.7	50.0425954298224	-0.931738762850146	0.436985965605663	-2.13219379153002	0.0329909186456549	0.186910984337018
ENSMUSG00000002981.9	136.621114199914	0.200570225360308	0.320704130346106	0.625405806728622	0.53170475201942	0.780408768945787
ENSMUSG00000002983.15	242.564020902118	-0.427014701033976	0.318708735450487	-1.33982741461542	0.180301460670606	0.46886447497565
ENSMUSG00000002984.15	68.7466145694006	-0.0550642244308417	0.4522160042928	-0.121765315486687	0.903084883729295	0.968279730256642
ENSMUSG00000002985.14	6.21300332595527	-0.631279052468593	1.16036244955068	-0.544036092096087	0.586416636586618	NA
ENSMUSG00000002992.15	1.37499527394128	-0.680477563549915	6.16007936741079	-0.110465713664325	0.912040039953469	NA
ENSMUSG00000002996.16	206.715460651492	0.346542536600234	0.409907447177559	0.845416542164267	0.397878311699507	0.687920022151924
ENSMUSG00000003031.13	155.250008994004	-0.37006393441068	0.390591180352169	-0.947445700327946	0.343411713121867	0.644121271136722
ENSMUSG00000003032.8	6.59794228829196	-1.54266532289912	1.17579321711234	-1.31202094079756	0.189513069063698	NA
ENSMUSG00000003033.13	90.5001142983982	-0.451582573207987	0.380381923412175	-1.18718200159754	0.235155838662263	0.536387564830121
ENSMUSG00000003037.15	125.207929479482	-0.202574394638807	0.355250521244116	-0.570229690105381	0.568521921293178	0.801519080178652
ENSMUSG00000003038.14	53.6096294935218	-0.285559373618288	0.4615175173197	-0.618740054064897	0.536087618781214	0.781991878996664
ENSMUSG00000003039.8	25.2786003928424	-0.490691091820385	0.589060790754601	-0.833005862080546	0.404841423189228	NA
ENSMUSG00000003062.11	15.5968697417367	-0.303036689472902	0.728845297471507	-0.415776421312163	0.67757361403697	NA
ENSMUSG00000003068.14	45.8442199645558	-0.172511383179784	0.576600721368801	-0.299186901414651	0.764797442990332	0.914450764142076
ENSMUSG00000003072.14	106.025508627203	0.0624849669527025	0.403715336966474	0.154774815894328	0.876998845938008	0.959691463962962
ENSMUSG00000003099.10	31.3339264163847	-0.445344981780416	0.55347754056152	-0.804630629327072	0.421032861619257	NA
ENSMUSG00000003119.13	138.840336904047	0.508916938471835	0.331652602850489	1.53448799767526	0.124909643753213	0.392030668607666
ENSMUSG00000003123.14	7.85977602718415	-0.904766448224601	0.960299897746729	-0.942170722237466	0.346105240885548	NA
ENSMUSG00000003131.6	46.3614736239186	0.31028017376922	0.468675323880646	0.662036505784198	0.507947826153103	0.765405401333974
ENSMUSG00000003135.14	63.7948635473691	0.45406442222	0.409469125216972	1.10891003559645	0.267468994086322	0.576769040002205
ENSMUSG00000003153.9	12.5509989342797	0.21152353193012	0.852833155104805	0.248024517649206	0.804115437028988	NA
ENSMUSG00000003154.14	14.6621882873468	-0.510830515869261	0.716476997318887	-0.712975458780713	0.475860943334784	NA
ENSMUSG00000003161.14	146.795040921217	-0.27506378843166	0.325449437209116	-0.84518133074822	0.398009604277573	0.687920022151924
ENSMUSG00000003184.13	86.3563352875347	6.41892538712375e-05	0.368452318698735	0.000174213190184106	0.999860997985967	0.999860997985967
ENSMUSG00000003190.10	5.28701821522332	-1.19237197189797	1.17641361717439	-1.01356525841813	0.31079024222753	NA
ENSMUSG00000003198.9	10.2191550185455	0.129029210160621	0.965756716050232	0.133604258729183	0.893715516406109	NA
ENSMUSG00000003199.15	22.0097315189299	0.593252236336393	0.671556156975287	0.883399296059502	0.377020570987767	NA
ENSMUSG00000003200.9	58.9762149390809	0.2619973393859	0.42595585528123	0.615080967047444	0.53850125081335	0.783166649089063
ENSMUSG00000003208.8	24.649668921626	-0.293870149158981	0.576027030124583	-0.510167290405491	0.609934265854305	NA
ENSMUSG00000003226.6	811.40701018682	0.61586916278778	0.258440875334536	2.38301763213955	0.0171713718526282	0.126297080553009
ENSMUSG00000003228.8	6.59754783989209	-0.433445972511127	1.18448881169723	-0.365935049981647	0.71441354147654	NA
ENSMUSG00000003233.10	16.870770492264	-1.01991289447586	0.736487904301045	-1.38483319076882	0.166103479446155	NA
ENSMUSG00000003234.14	75.5411172752603	0.460135417067675	0.408996032442871	1.12503638316332	0.260573617103931	0.569342259887917
ENSMUSG00000003235.11	94.2463289192329	0.597575647560449	0.391879135489838	1.52489784079343	0.12728458052874	0.393789335205793
ENSMUSG00000003269.13	46.1411494737604	-0.0365287478189068	0.451718713700323	-0.0808661379549144	0.935548409737491	0.981745480904962
ENSMUSG00000003271.14	17.7806683027751	1.16488918870659	0.941880271708184	1.23676992044218	0.216172512138171	NA
ENSMUSG00000003299.9	34.5103168443004	0.426515476192586	0.513928210429255	0.829912558869539	0.406588223700308	0.694795044495642
ENSMUSG00000003308.13	36.5909471841106	-0.754867772747052	0.510207951982522	-1.47952961104164	0.138998823355947	0.412441572241933
ENSMUSG00000003316.13	226.245007433167	0.0596358183428035	0.297902641953673	0.200185597387477	0.841335430811809	0.944604992586879
ENSMUSG00000003344.13	19.2282279783667	0.133212641284178	0.677789156152571	0.196539941772382	0.844187573229658	NA
ENSMUSG00000003345.14	66.4018890882646	-1.15153008393126	0.501943448771914	-2.29414306880319	0.0217822821760232	0.145603996195443
ENSMUSG00000003346.13	16.1711499600416	0.388861341227967	0.8388266717292	0.463577702442805	0.642950332610276	NA
ENSMUSG00000003348.9	70.8177564550595	-1.03210993206867	0.465922875937358	-2.21519480019572	0.0267466966419427	0.16320078175579
ENSMUSG00000003360.13	100.448338539925	-0.283467738674803	0.361563147029088	-0.784006171547116	0.433036489026057	0.714726764552545
ENSMUSG00000003363.14	161.559126687513	-0.329696797083589	0.331557289299128	-0.994388625207207	0.320033703730943	0.624577791645535
ENSMUSG00000003379.7	2.99032708634551	-1.51510278621844	1.6989822366107	-0.891770822301777	0.372515783922134	NA
ENSMUSG00000003380.10	154.517965041785	-1.40789275950438	0.373176501156723	-3.7727261902622	0.00016147346497305	0.00419014570062089
ENSMUSG00000003382.17	74.9751739512203	0.503707897733821	0.402638163534536	1.25101876412323	0.210927631586669	0.510091481831845
ENSMUSG00000003402.12	163.346880675342	-0.334849796288802	0.357326939075633	-0.937096422550796	0.348708961477892	0.646602446032269
ENSMUSG00000003418.11	180.380137359643	-0.515648242683621	0.383547005134349	-1.3444199427473	0.178812628505547	0.466630243540747
ENSMUSG00000003421.11	49.3707829118689	-0.521338633075958	0.453926522109459	-1.1485088614193	0.250758556961274	0.557388726950975
ENSMUSG00000003423.13	24.2512466973244	-1.13848953629863	0.582635087539614	-1.95403531412142	0.0506970409997433	NA
ENSMUSG00000003429.10	788.336055554532	1.88869257739705	0.274920254405957	6.86996518855296	6.42175731066375e-12	5.81609745450115e-10
ENSMUSG00000003435.8	228.114028016204	-0.173240857448004	0.302073824387095	-0.573505029108392	0.566302794939275	0.800904044649268
ENSMUSG00000003437.13	64.4992289914275	0.877448072453369	0.443764368652017	1.97728374434098	0.0480095660868708	0.231236898597764
ENSMUSG00000003438.16	42.8937096477954	0.510268398213856	0.619737631864753	0.823361971224	0.410302182091698	0.697785632946079
ENSMUSG00000003444.8	24.7104304631438	0.6302895633318	0.597435378095069	1.05499203167628	0.291428969082682	NA
ENSMUSG00000003458.11	118.039763248509	-0.283239748940913	0.351135093262877	-0.80664039104991	0.419873695979962	0.701759775680632
ENSMUSG00000003464.12	30.1440993725959	-0.437908104345027	0.537630997469498	-0.814514241935745	0.415350416754336	NA
ENSMUSG00000003500.12	57.1841662193088	0.280245996949252	0.432552963716475	0.647888282954741	0.517057209659661	0.770274149465073
ENSMUSG00000003526.10	1.74291355712364	-0.953938387215539	2.04154026982392	-0.467264056122594	0.640310969311952	NA
ENSMUSG00000003527.8	42.3773362835424	-0.0411964382552747	0.492959620340159	-0.0835695999336574	0.933398638098829	0.980815294804889
ENSMUSG00000003528.13	25.6909421535982	-0.0380675689460341	0.568818993548681	-0.0669238709990021	0.946642309328009	NA
ENSMUSG00000003531.13	2.00038633212015	-1.63158561515316	1.87213508026121	-0.871510625678525	0.383475406656617	NA
ENSMUSG00000003534.16	23.0057740036723	-1.49579791396796	0.614364566754325	-2.43470732999825	0.0149038389001326	NA
ENSMUSG00000003541.6	1.55137383936195	-2.12862365891419	2.32320553528768	-0.916244226600724	0.35953881359933	NA
ENSMUSG00000003545.2	26.7207388815146	2.28834862285652	0.771023842462816	2.96793496754529	0.0029980775507765	NA
ENSMUSG00000003546.9	28.0865886042351	-0.00473583185965367	0.575218356143273	-0.00823310280187596	0.99343100859903	NA
ENSMUSG00000003549.8	25.1414294224761	-0.279982877929047	0.582157375946283	-0.480940188164655	0.630559009008987	NA
ENSMUSG00000003559.7	2.04989899339621	0.572156721395861	1.78191149883469	0.321091547907981	0.748141015258992	NA
ENSMUSG00000003573.14	2.48570972416091	-0.230684301255979	1.81207983118853	-0.127303608420317	0.898700104439343	NA
ENSMUSG00000003575.12	25.5604557706944	-0.827302944840836	0.6444020726544	-1.28383035987615	0.199201318283409	NA
ENSMUSG00000003581.13	16.9817040659219	-0.609403552147111	0.718048456196773	-0.848694188933832	0.396051480572352	NA
ENSMUSG00000003604.13	13.6362356773735	0.114746045662047	0.802364122187358	0.14300994085981	0.886282330224114	NA
ENSMUSG00000003623.4	33.0997262346134	-0.195983784771119	0.55051501823622	-0.356000796125464	0.7218399689683	0.892207336543906
ENSMUSG00000003644.16	56.5092266597918	-1.28991578875786	0.421607074148323	-3.05952121738844	0.0022169108394638	0.0319000347896676
ENSMUSG00000003660.10	453.733655465342	0.303961249382002	0.27009957579663	1.12536737047995	0.260433391992077	0.569305176342359
ENSMUSG00000003662.9	46.7273733863031	0.826931321164616	0.472337822494175	1.75072010282389	0.0799941349167771	0.306633119651945
ENSMUSG00000003680.14	10.1504639020699	-1.04759078347041	0.904249748348217	-1.1585192977759	0.246652181131645	NA
ENSMUSG00000003721.13	7.18648436592367	-2.0447749338536	1.04498017624958	-1.95675954465688	0.0503757454992473	NA
ENSMUSG00000003731.12	52.1250657126743	1.08531022100461	0.441024561327211	2.4608838513177	0.0138595226109987	0.110564999896724
ENSMUSG00000003746.14	147.502652593794	-0.133679572219558	0.319733671601257	-0.41809663508406	0.675876465091519	0.867048658062295
ENSMUSG00000003752.8	35.4079037153294	-0.499421608630185	0.546365724503201	-0.914079317629778	0.360675169308861	0.658221496261411
ENSMUSG00000003762.12	16.7053706505121	-1.08578913434851	0.718317539706425	-1.51157263233788	0.130642618275669	NA
ENSMUSG00000003778.13	80.1649247033873	0.145203300443104	0.394302371986429	0.368253682349398	0.712684085608483	0.887062191168306
ENSMUSG00000003779.14	7.87462829867373	-1.5974067524583	1.10161663208949	-1.45005685819069	0.147042664333416	NA
ENSMUSG00000003808.17	75.8192251548114	0.514812534047775	0.400403630273889	1.28573393227136	0.198535934646489	0.494359828642658
ENSMUSG00000003809.13	4.37223639475341	1.36993045206975	1.31981132889757	1.0379744604966	0.299281945426441	NA
ENSMUSG00000003810.11	27.4118280564157	-0.716924662949589	0.640454374094458	-1.11940005712859	0.262969506613933	NA
ENSMUSG00000003812.12	10.5957909755247	-0.0623075220968061	0.952169930779653	-0.0654373973412369	0.947825749101073	NA
ENSMUSG00000003813.14	65.9734128920184	-0.717985985177688	0.395905095946386	-1.813530546914	0.069750031598458	0.281130362960975
ENSMUSG00000003814.8	798.316903103274	1.13589894359612	0.30883977590511	3.67795547146467	0.000235110991133154	0.00559782303115483
ENSMUSG00000003824.11	2.0459721015012	-0.336391340179606	1.81607869505402	-0.185229495338361	0.853049035433466	NA
ENSMUSG00000003847.15	68.868243892723	0.0461139481909096	0.450198949108561	0.102430155117465	0.918415249222733	0.975657782005474
ENSMUSG00000003848.13	47.4902573772703	0.383708361454931	0.534710720719971	0.717599903249144	0.473004017317398	0.740722366867328
ENSMUSG00000003865.13	7.7661328295919	-1.36851119555314	1.0546326994614	-1.29761877879572	0.194418365958541	NA
ENSMUSG00000003868.11	89.8525179660642	0.16257461813155	0.39615313827333	0.410383264512674	0.681524820849789	0.868563244972467
ENSMUSG00000003873.10	52.8856917437011	-0.701259688861867	0.44172525497639	-1.58754719355892	0.112388767205302	0.371585769261921
ENSMUSG00000003882.4	298.345497342554	-0.412025511709449	0.381067365166272	-1.08124061353212	0.279590096372973	0.589154495961115
ENSMUSG00000003923.13	42.0011143744612	0.831436113099042	0.480618050731902	1.72993109982636	0.0836425860274118	0.313846551470849
ENSMUSG00000003929.10	15.1405747532061	0.364039134149005	0.732105811609822	0.497249343436465	0.619013229104368	NA
ENSMUSG00000003948.15	11.3149675502072	0.688307361262494	0.832523881130217	0.826771912330086	0.408366352849399	NA
ENSMUSG00000003949.15	1.92011355743964	-2.08822337745672	2.25867778850235	-0.924533542626879	0.355208595890049	NA
ENSMUSG00000003955.7	38.8563863524289	0.387125680803091	0.56966014517873	0.679573047332688	0.496774840519187	0.756470063583186
ENSMUSG00000003970.8	1718.40824057008	2.04044119013261	0.260098101624667	7.84489074463549	4.33330586620794e-15	6.67184659867149e-13
ENSMUSG00000003992.13	29.8089906052538	-1.05526719134207	0.557520612359436	-1.89278596691908	0.0583863385105659	NA
ENSMUSG00000004018.8	15.6976489021714	0.703365937346345	0.819072844363	0.858734289858381	0.390487127806292	NA
ENSMUSG00000004040.15	411.677213633402	1.25093771140753	0.273477126386087	4.57419502661255	4.7805438643694e-06	0.000200739382813839
ENSMUSG00000004043.13	426.311721696926	0.511456337193068	0.332332055758147	1.53899188577005	0.123806277189198	0.391624154394741
ENSMUSG00000004054.8	49.8037516736016	-0.369635553083307	0.486128784495125	-0.760365493409727	0.447036143430932	0.722314233315408
ENSMUSG00000004056.14	96.2225118712124	-0.788303471427595	0.362447159506901	-2.17494730128403	0.0296340657097044	0.175038042855658
ENSMUSG00000004069.15	42.9180702777105	1.04420729810892	0.469393460011571	2.22458851063494	0.0261088746401323	0.161010536665916
ENSMUSG00000004070.14	37.3906829007591	-0.325570185950287	0.505639838968432	-0.643877639496308	0.519654782662986	0.77204420750091
ENSMUSG00000004071.11	28.3397302795153	0.289282607250045	0.575841777882994	0.502364743859944	0.615410974352115	NA
ENSMUSG00000004096.8	69.9408637367688	-0.034365629666871	0.460958989109983	-0.0745524666591793	0.940570794924956	0.982570098566165
ENSMUSG00000004099.14	142.977409558656	-0.217486604203172	0.324168574904563	-0.67090588366624	0.50228048794668	0.760916226246545
ENSMUSG00000004100.10	127.30730392507	0.599220822564065	0.445024821140562	1.34648854198359	0.178145013150147	0.466456662448165
ENSMUSG00000004105.7	4.71070728229926	-0.371712861063367	1.28331336302638	-0.289650892582287	0.772083328464888	NA
ENSMUSG00000004113.17	3.28632456385591	-0.740614162925357	1.55952473506086	-0.474897349349482	0.634860140831731	NA
ENSMUSG00000004127.11	6.22573730709146	1.23185207324212	1.14561054965607	1.07527996631311	0.282249402756439	NA
ENSMUSG00000004207.13	503.491385665561	-0.343249367217515	0.27551432336184	-1.24584944633429	0.212819672577686	0.51193193454219
ENSMUSG00000004221.15	42.4370346907647	-0.60459750195051	0.466884480563181	-1.2949616599404	0.195333455901492	0.489552486602818
ENSMUSG00000004233.13	6.17729838169071	1.25124267098039	1.18970384824763	1.05172616935164	0.292925200918879	NA
ENSMUSG00000004264.16	96.8135601281469	0.356201990485802	0.383155344274277	0.929654240267672	0.352550134209796	0.649552879902293
ENSMUSG00000004266.14	159.408545313071	0.37773353150124	0.382788820938628	0.986793529066518	0.32374386763884	0.625940947937967
ENSMUSG00000004268.10	112.005131503321	1.11273658960876	0.353061209789495	3.15168180121571	0.00162333070758734	0.0252463452469559
ENSMUSG00000004270.12	34.9861493108015	-0.29884109396107	0.50689066181428	-0.589557307864872	0.555487480753989	0.793329351377885
ENSMUSG00000004285.11	97.4830695184125	-0.274788151823483	0.408716504203042	-0.672319686133775	0.50138019980071	0.760050916599763
ENSMUSG00000004317.13	7.8096981093101	0.942331223627365	1.01795871488993	0.925706720561117	0.354598414338186	NA
ENSMUSG00000004319.14	43.8021257047539	-0.208101932816934	0.502949593130975	-0.413763000624879	0.679047683120884	0.867274876718674
ENSMUSG00000004356.7	117.452791783313	0.841092717397027	0.416931076692839	2.0173423484493	0.0436597991282347	0.219688131180179
ENSMUSG00000004364.13	157.335832239182	-0.180631561820954	0.31477224113437	-0.573848447277299	0.566070361244632	0.800820520241639
ENSMUSG00000004393.9	90.8450542198036	0.803230981346758	0.376197980353232	2.13512837201455	0.0327505256892471	0.186581831822516
ENSMUSG00000004394.11	21.5672977656118	0.283443956031187	0.650260469988282	0.435892952306166	0.66291439874514	NA
ENSMUSG00000004446.11	13.0224720781046	0.0637727476393317	0.805301402779428	0.0791911542923253	0.936880580349029	NA
ENSMUSG00000004451.13	3.78030286631268	-0.570117053691626	1.41040598396987	-0.404221947560742	0.686049515829894	NA
ENSMUSG00000004455.15	255.921378778483	0.629381171362402	0.288393866470007	2.18236670240647	0.0290824797475	0.172220479427824
ENSMUSG00000004460.15	71.0665376598916	0.328393201574189	0.421158935236817	0.779736992614284	0.435545699842927	0.715332716622736
ENSMUSG00000004462.6	5.61600160329096	1.48632648516804	1.47010584224303	1.01103365652929	0.312000321435005	NA
ENSMUSG00000004500.8	3.47426496252555	0.651054831931244	1.46339572720729	0.444893216391784	0.656396925171452	NA
ENSMUSG00000004530.11	63.2564966653691	0.591671573287592	0.408942942272513	1.44683160442787	0.147944092799784	0.424707125321443
ENSMUSG00000004535.11	358.465060606738	0.0859145417598203	0.32177622549259	0.267000899859206	0.789468468248095	0.924348505662345
ENSMUSG00000004552.15	16.5187158858728	-0.372206830667748	0.696437590725978	-0.534443912310582	0.593034444599405	NA
ENSMUSG00000004558.13	8.04132093086916	-0.998335079469418	0.986404010411294	-1.01209551961691	0.311492384414435	NA
ENSMUSG00000004561.13	18.0398529300815	1.66028339367773	0.727319419066232	2.28274311142316	0.0224455047210493	NA
ENSMUSG00000004565.13	15.1534002896785	-1.65752898746435	0.821231062316861	-2.01834667917714	0.0435551684089742	NA
ENSMUSG00000004567.14	13.0817126492902	-0.518846741794852	0.766044303959529	-0.677306441824627	0.498211544560181	NA
ENSMUSG00000004568.11	121.264520748856	-2.12977453917235	0.39510672145116	-5.39037789929275	7.03096738949928e-08	3.86619504429728e-06
ENSMUSG00000004591.15	103.884157297069	0.198676829402886	0.401515821357751	0.494816938299087	0.620729346754488	0.834461060476162
ENSMUSG00000004610.3	16.3200873664973	-0.515960545303693	0.78590244920206	-0.656519833762519	0.51148971041083	NA
ENSMUSG00000004612.8	2.75745028201919	0.342763462385145	1.61997205758873	0.211586033709332	0.832430006133304	NA
ENSMUSG00000004626.13	85.0995889891798	-0.786737889748972	0.374761971534349	-2.09930022122552	0.0357904439470697	0.195640308392326
ENSMUSG00000004637.14	2.89622958175288	-0.847463328359603	1.56341668900537	-0.54205851473848	0.587778196291388	NA
ENSMUSG00000004642.12	75.2300274472401	0.341526888202909	0.402017329779281	0.849532751213528	0.395584914030713	0.686704623476809
ENSMUSG00000004661.14	20.2017856260696	-0.729809500266913	0.688092122901642	-1.06062760490463	0.288859172184918	NA
ENSMUSG00000004665.9	266.246047975358	0.0776710820353001	0.296256105739973	0.262175464169075	0.793186168708086	0.92561399359444
ENSMUSG00000004667.17	96.7288637852357	-0.0126725736518097	0.372337388190901	-0.0340351897331148	0.972849089598376	0.994853558575559
ENSMUSG00000004677.14	293.547726874043	-0.618201354326116	0.363324764116447	-1.70151174756693	0.0888469337790889	0.323867348211454
ENSMUSG00000004707.13	131.316272950819	0.242647862986466	0.345841662296759	0.701615477369107	0.482918996781133	0.747387110566352
ENSMUSG00000004730.13	1.33329439947682	0.889396143938771	2.44825331725574	0.363277826550931	0.716397355407059	NA
ENSMUSG00000004771.11	55.3188256819851	-0.138205618733994	0.447954826514637	-0.308525794463067	0.757682275748824	0.911087265991174
ENSMUSG00000004788.10	39.9061302880261	-0.232410679049372	0.480525691257996	-0.483659215891101	0.62862774199285	0.839137836257733
ENSMUSG00000004789.9	88.1246003737039	0.312530596464652	0.371687037748081	0.84084341051591	0.400435664214027	0.688868652888115
ENSMUSG00000004798.13	31.2441198344977	-1.37952863160673	0.630868032220183	-2.18671506741564	0.028763330972358	NA
ENSMUSG00000004815.11	26.516396172763	0.046311522186338	0.665320215389578	0.0696078686850367	0.944505773829819	NA
ENSMUSG00000004837.2	266.406507145513	-0.274963166981887	0.290283420536419	-0.947223118956565	0.343525097106703	0.644121271136722
ENSMUSG00000004843.6	18.083298559954	0.221996678906843	0.693429899221963	0.320142928875618	0.748859984217623	NA
ENSMUSG00000004846.9	5.66199344398499	-0.578873107278492	1.12564072655819	-0.514260983651933	0.607069536074439	NA
ENSMUSG00000004849.13	7.09013008409981	-1.42757190220659	1.24344781943538	-1.14807543983214	0.250937422101438	NA
ENSMUSG00000004865.14	291.296617899473	-0.369988104776974	0.27863051734495	-1.32788076590663	0.184217499773492	0.472460095199201
ENSMUSG00000004880.10	240.863147887151	-0.0771192421616151	0.284905671921844	-0.270683421784494	0.786634528465935	0.924075505336764
ENSMUSG00000004895.9	53.6735319818718	-0.42452752861053	0.426956090284898	-0.994311917010606	0.320071035735319	0.624577791645535
ENSMUSG00000004896.15	16.2349367574462	-0.214956555375632	0.699098712434204	-0.307476686128016	0.75848056587778	NA
ENSMUSG00000004897.15	60.6379734873227	-0.648378152410213	0.432913588170327	-1.49770801870768	0.134209127568246	0.406233263589599
ENSMUSG00000004929.11	16.688758738694	2.00251924186818	0.8560381793725	2.33928730063896	0.0193205695034262	NA
ENSMUSG00000004931.10	38.4449555263747	-1.31624824032284	0.538420940538892	-2.44464533456934	0.0144994648749771	0.112939339388734
ENSMUSG00000004933.16	24.7909135107124	-0.105676816631155	0.597771190083064	-0.176784726972991	0.859677486204851	NA
ENSMUSG00000004934.12	39.7582220698	-0.00887778186535725	0.495423771331131	-0.0179195718475598	0.985703015444028	0.997105475057845
ENSMUSG00000004936.8	48.0233714201506	-0.495926482216811	0.439561811406895	-1.12822922589547	0.259223124142791	0.568273189565996
ENSMUSG00000004937.5	37.5173910718914	0.00588170325270991	0.514054012047602	0.0114418001121743	0.990870963530787	0.998450762580816
ENSMUSG00000004945.14	11.1572842001236	-0.376979757460862	0.822853924389527	-0.458136913839893	0.646854079999375	NA
ENSMUSG00000004947.14	24.5410193005895	-0.48341820871771	0.602290328869219	-0.802633191247339	0.422186778183539	NA
ENSMUSG00000004980.15	606.710140569718	0.192757854509304	0.292827992607994	0.658263073801646	0.510369101411604	0.766828382095114
ENSMUSG00000004994.11	13.408573011246	-0.0090865679607161	0.749379078343859	-0.0121254625640171	0.990325517696256	NA
ENSMUSG00000004996.8	39.5721254860931	-0.0116646512810322	0.514417646275409	-0.0226754493464385	0.98190915938318	0.997105475057845
ENSMUSG00000005034.14	74.5735869851982	-0.0872246361987695	0.412256770347809	-0.211578420228686	0.832435946349761	0.941253766509069
ENSMUSG00000005043.12	11.309170746064	-0.922414019739037	0.863498337283949	-1.06822906300017	0.285417197950616	NA
ENSMUSG00000005054.6	32.7191101104874	-0.237972948726865	0.59048327418768	-0.403013868689578	0.686938021967709	0.871311179712963
ENSMUSG00000005069.11	91.8281398748222	-0.713864516246378	0.365561343551565	-1.952789945761	0.0508444903921934	0.236506244835389
ENSMUSG00000005078.15	14.7023908013858	-0.45792577542319	0.736057098072945	-0.622133495651459	0.533854091491433	NA
ENSMUSG00000005087.16	179.358463454211	1.25403386666237	0.35231335585492	3.55942755453976	0.000371664037853679	0.00791113452002832
ENSMUSG00000005102.12	24.4302226717765	0.373675484323794	0.679206855365654	0.550164476951023	0.582206565960407	NA
ENSMUSG00000005103.11	500.297588486292	0.0898344863839673	0.263464463016417	0.340973827572221	0.733123284899116	0.899727978629304
ENSMUSG00000005125.11	167.525449543576	0.414534964572959	0.332998825942996	1.24485413244046	0.213185373661575	0.512332591541527
ENSMUSG00000005142.9	136.186190703038	-0.157007578162429	0.326505420478316	-0.480872807356214	0.630606900284756	0.84008723826303
ENSMUSG00000005150.15	6.44635095259751	-0.74126155631962	1.07397444598251	-0.690204091068	0.490065851000675	NA
ENSMUSG00000005161.14	33.1816389734339	0.401833860690213	0.524595421032772	0.765988120710475	0.443683370567783	0.720715473386301
ENSMUSG00000005198.14	433.285143170688	-0.823060877656347	0.354152685074592	-2.32402834241675	0.0201239750485482	0.140200061461906
ENSMUSG00000005204.11	82.2895467647108	-0.212482711843981	0.389444093379491	-0.545605172747937	0.585337367877887	0.812646018102784
ENSMUSG00000005233.15	1.74186419855184	-0.300857258732506	2.18925945769866	-0.137424213322237	0.890695493149115	NA
ENSMUSG00000005262.11	52.8488261137502	0.592674404111138	0.42987538521478	1.37871212099064	0.167983530837388	0.455082656268561
ENSMUSG00000005267.12	5.03787718743968	0.0271071046832662	1.37967511746145	0.0196474549263033	0.98432460757071	NA
ENSMUSG00000005299.6	70.2774940963198	-0.638443963274648	0.399844870184967	-1.59672915893433	0.110326092939885	0.369005230477428
ENSMUSG00000005312.13	188.395211570559	0.0958682117318888	0.301557145971279	0.317910595098349	0.750552755500975	0.907559514693679
ENSMUSG00000005354.14	45.7512812192067	-0.849501789157374	0.697095842443687	-1.21862983170209	0.222984721153525	0.523889332150627
ENSMUSG00000005362.13	136.423058454463	0.656201517501916	0.358349092893417	1.83117951326052	0.0670737535015035	0.275145352951549
ENSMUSG00000005370.3	71.7124598126238	0.582735769389334	0.400800106370395	1.45393117448628	0.145965388760658	0.42323548693376
ENSMUSG00000005371.13	109.196012236509	0.29385713744538	0.361679877938115	0.812478535219094	0.416517098309548	0.70098547208206
ENSMUSG00000005374.12	13.4314593238256	0.0878239928763632	0.791507966545448	0.110957812919651	0.911649800503602	NA
ENSMUSG00000005378.16	32.7224777154503	0.0422990470295835	0.552918693619559	0.0765013871256229	0.939020210444559	0.98254042070929
ENSMUSG00000005410.5	89.3740722756586	0.183729134318085	0.364369747068207	0.504238169596698	0.614094020924471	0.830600375593011
ENSMUSG00000005413.7	8.31003094190941	-1.81438737453859	1.20155108223319	-1.51003765163807	0.131033817036782	NA
ENSMUSG00000005417.16	63.0584132902188	-1.25193230111424	0.46261222718507	-2.70622397668145	0.00680531299211009	0.0712783236067041
ENSMUSG00000005442.12	111.748483883976	-1.62210542621162	0.369503886582698	-4.38995497777688	1.13374131565276e-05	0.000443792469237297
ENSMUSG00000005447.11	4.98302187042478	-0.714443630634549	1.2656629483142	-0.564481745780861	0.5724263198029	NA
ENSMUSG00000005465.8	94.7931279057975	-0.72792865257244	0.375594421108177	-1.93807099270728	0.052614561847029	0.240317669517532
ENSMUSG00000005469.9	29.8153504210738	-0.920402533884357	0.546637817975972	-1.6837520266935	0.0922296020413808	NA
ENSMUSG00000005470.8	5.19576817392819	0.732391449639833	1.31527754736349	0.556834145848481	0.577640751848301	NA
ENSMUSG00000005481.16	136.779712342069	1.08732423399887	0.366904848129745	2.96350467850556	0.0030415743822232	0.0397989577096005
ENSMUSG00000005483.9	101.540075223872	0.567870107611218	0.38306988821698	1.4824190704584	0.138228822771343	0.411806260091057
ENSMUSG00000005501.13	22.0840542582346	-1.01407998964251	0.705380318710769	-1.43763578702614	0.150537421302169	NA
ENSMUSG00000005505.11	26.1106227408839	0.53408385111455	0.581121298690777	0.919057436576152	0.358065530601741	NA
ENSMUSG00000005506.15	129.802775401545	-0.0930759245298976	0.334465069568123	-0.278282944912847	0.780795167236279	0.921739831123446
ENSMUSG00000005510.8	57.86880758544	0.222435935155158	0.454027259934122	0.489917577168016	0.624192224447646	0.835936179972072
ENSMUSG00000005514.13	96.7459384005894	0.621157054471981	0.3649799137821	1.70189380570358	0.0887752771782566	0.323867348211454
ENSMUSG00000005533.9	143.589102520073	-1.58111700641588	0.470124872603865	-3.36318518452044	0.000770486597587516	0.0144084113127803
ENSMUSG00000005534.9	39.582642185864	-0.385707354495897	0.57326922090989	-0.672820623238248	0.501061415758974	0.759817031973309
ENSMUSG00000005566.12	339.652276646165	0.331499768988399	0.303561677885253	1.09203431506169	0.274818018571725	0.584344794555832
ENSMUSG00000005575.14	40.7777785059517	0.547598215609199	0.492560102824434	1.11173887708153	0.266250439020649	0.57575410947396
ENSMUSG00000005609.14	98.6228500349149	0.357325933373193	0.361017265790697	0.989775191473407	0.322284013318746	0.625212035917383
ENSMUSG00000005610.15	184.502631226153	-0.245629840153151	0.324744545465106	-0.756378647719409	0.449422206202716	0.722314233315408
ENSMUSG00000005615.13	8.11353819936351	0.438997498980322	1.08718219840284	0.403793862358347	0.686364310219445	NA
ENSMUSG00000005621.11	136.145949946762	-1.02601076553362	0.369331967586773	-2.77801776065476	0.00546916287133282	0.0623754649449044
ENSMUSG00000005625.14	225.669804857422	0.0487488832514941	0.28452106015057	0.171336642797886	0.863959069656239	0.953492420998535
ENSMUSG00000005656.8	57.9023968297612	-0.85139436622295	0.431318025089533	-1.97393643830725	0.0483889708145793	0.232352413351438
ENSMUSG00000005667.7	221.454823127048	1.1122996674978	0.366582199927105	3.03424352769715	0.00241139690618911	0.0337522494232955
ENSMUSG00000005672.11	25.2263545689349	-0.510600573708236	0.5948258274327	-0.858403502605149	0.390669694180395	NA
ENSMUSG00000005674.8	8.67575185863906	-0.488603120603888	1.24821636486536	-0.391441046886604	0.6954712568196	NA
ENSMUSG00000005682.8	39.5095546528759	-0.877502123532678	0.510832790523686	-1.71778738524811	0.0858354032840212	0.318603532403052
ENSMUSG00000005683.7	123.121078366589	0.536837119381049	0.351249390091077	1.52836455955653	0.126422048979423	0.393650908811571
ENSMUSG00000005686.15	2.2923894628401	-0.485841148361082	1.80652246199552	-0.268937230829897	0.787977986002227	NA
ENSMUSG00000005687.13	59.3020829690727	1.08803600575163	0.442941205058973	2.45638923027441	0.01403410603659	0.111008754761752
ENSMUSG00000005696.10	43.6660694660378	-0.309321582929351	0.515751454618517	-0.599749317543166	0.548673315187527	0.789508424564233
ENSMUSG00000005698.14	178.753188868331	-0.488697808114016	0.3251940018479	-1.5027885057443	0.132893590895296	0.403910456342287
ENSMUSG00000005699.14	3.6978876419274	-1.23644013389951	1.39256861662567	-0.887884531604284	0.374602866141977	NA
ENSMUSG00000005718.7	10.5772038379366	0.329035767460435	0.935163847593826	0.351848254513948	0.724952067654601	NA
ENSMUSG00000005732.13	82.9424189022149	0.29122245733829	0.391435507143214	0.743985795932766	0.456885068331502	0.727456784082457
ENSMUSG00000005763.14	290.936263932434	-0.313018425277133	0.302943497779618	-1.03325678739223	0.301483743969579	0.606391477297971
ENSMUSG00000005774.11	20.6809027102475	-0.693315132946151	0.682317935877196	-1.01611740874848	0.309573479950229	NA
ENSMUSG00000005779.11	295.123588630318	0.880357329343273	0.290117525834501	3.0344851687639	0.00240946602089697	0.0337522494232955
ENSMUSG00000005802.11	15.4934896003978	0.263217087423389	0.891607180463602	0.295216428479778	0.76782855286726	NA
ENSMUSG00000005803.13	7.27778190667298	-0.132436526801151	1.04770933491375	-0.12640579060227	0.899410718684047	NA
ENSMUSG00000005804.13	12.5009312814543	-0.592368806572443	0.822176326602959	-0.720488765493861	0.471224114368593	NA
ENSMUSG00000005813.11	51.8867971743891	0.55952938250687	0.435339520776597	1.28527127863037	0.198697503094147	0.494495564004237
ENSMUSG00000005823.8	38.6917888939875	-0.842516672519783	0.477280056553073	-1.76524591998345	0.0775224441144537	0.301157417463971
ENSMUSG00000005824.6	22.361879771062	1.05599170581414	0.905513750335604	1.16617964710394	0.243541819671543	NA
ENSMUSG00000005846.11	179.954724031931	1.26415462236724	0.320388664627421	3.94569084969756	7.95702241339744e-05	0.00231154003317502
ENSMUSG00000005871.13	87.746534722474	-0.181028521636091	0.46684292671468	-0.387771799200313	0.698184916718697	0.877426018099135
ENSMUSG00000005873.5	77.851050517424	-0.434229686254619	0.417369140543927	-1.04039720255484	0.298155400849482	0.603496843349587
ENSMUSG00000005881.12	37.9306574268177	0.246029693370461	0.509434684455576	0.482946491233492	0.629133730005388	0.839137836257733
ENSMUSG00000005882.17	21.1280766094962	-0.0281155949287567	0.620820194697467	-0.045287822736594	0.963877893529074	NA
ENSMUSG00000005886.13	248.944400125935	-0.862394814252797	0.324778548508758	-2.65533181982782	0.00792304300490633	0.0787022271820696
ENSMUSG00000005893.13	88.9732496320311	-1.04758981331584	0.384064117922551	-2.72764302737359	0.00637885970734796	0.0675778738262391
ENSMUSG00000005897.13	10.3513241151401	-0.874817959555873	0.848211097348703	-1.03136820809152	0.302368183586528	NA
ENSMUSG00000005899.11	26.9407835397014	0.181851757851316	0.647533717690933	0.280837511442321	0.778835030979508	NA
ENSMUSG00000005907.13	11.0147960589628	1.22782454847542	0.89207405961523	1.3763706446133	0.168706911553327	NA
ENSMUSG00000005936.17	56.5596666696195	0.18033634490276	0.434349267157702	0.415187404557734	0.678004718594778	0.867274876718674
ENSMUSG00000005947.10	18.8544455495272	-1.19576236323855	0.678462091926563	-1.76246009536518	0.0779915928328473	NA
ENSMUSG00000005949.8	17.2653058470244	-0.0595680601713766	0.860636871462237	-0.0692139299936911	0.944819335167656	NA
ENSMUSG00000005951.12	5.43943974698718	-0.192350185851633	1.20404454990899	-0.159753379446112	0.873075350115113	NA
ENSMUSG00000005968.13	5.64481970413846	0.121137633256357	1.12751281567463	0.107437921389724	0.914441571678019	NA
ENSMUSG00000005973.6	10.8754427411856	-0.250009917886231	0.841259325131972	-0.297185315416279	0.766325032307496	NA
ENSMUSG00000005981.11	84.6609080915044	-0.548319533721082	0.388390663800481	-1.41177320885025	0.158016749374934	0.438584073033804
ENSMUSG00000005982.12	13.0059894330623	-1.27566661811627	0.785247078103019	-1.62454169354949	0.104260249551008	NA
ENSMUSG00000006005.16	665.240329983336	0.401277339813386	0.300344061022035	1.33605884680352	0.181530039702491	0.469215027076556
ENSMUSG00000006010.13	12.8551898620452	0.901776623370333	0.81084781286331	1.11214041533384	0.266077782090505	NA
ENSMUSG00000006014.15	3.49331728372243	-1.23511471448008	1.52545150130648	-0.809671571611591	0.418128961057128	NA
ENSMUSG00000006019.14	15.8122119475227	-0.585610528566616	0.713802213652515	-0.820410076301187	0.411982373167192	NA
ENSMUSG00000006021.5	11.4212668410332	-1.00761579225178	0.84663721101173	-1.19013879752306	0.233991843434443	NA
ENSMUSG00000006024.11	120.951193447162	-0.0195962355480418	0.342234775327872	-0.0572596269016438	0.954338380624718	0.988804167811927
ENSMUSG00000006050.10	21.7015410687728	-0.459157254503554	0.673172648849442	-0.68207948627789	0.495188691143043	NA
ENSMUSG00000006057.14	98.9120682485574	0.338567244175712	0.388315496627238	0.871887027729719	0.383270011219855	0.676729427302947
ENSMUSG00000006058.9	24.7561305560046	-0.336921014525375	0.600763172934814	-0.560821684324403	0.574919102731327	NA
ENSMUSG00000006095.11	52.3924060600122	-0.657473082851597	0.463899638274398	-1.41727440292312	0.15640271594268	0.438098329253631
ENSMUSG00000006127.8	71.4857626466674	-0.117083335273241	0.474974052310726	-0.246504697895888	0.805291568229542	0.927506810282024
ENSMUSG00000006134.3	46.9081135417855	-0.452338034707022	0.482181194346057	-0.938107997597233	0.348188912218284	0.646520618893518
ENSMUSG00000006154.12	18.1576411096825	-1.77894225127269	0.797583263734809	-2.23041572229402	0.0257198567613085	NA
ENSMUSG00000006169.18	280.564956879514	-0.72011302738188	0.320526976969865	-2.24665341491547	0.0246621856263396	0.156932251079818
ENSMUSG00000006191.16	19.9668302841527	-0.197390766064786	0.671389107677799	-0.294003527622783	0.768755207789112	NA
ENSMUSG00000006215.11	67.3376343967858	-0.45326252737227	0.46834180968086	-0.967802826916382	0.333142851722386	0.635862327316405
ENSMUSG00000006262.14	14.2998500789435	1.29888079141984	0.764286820225978	1.6994677352094	0.0892310888468777	NA
ENSMUSG00000006273.13	118.088024182386	0.270120446190014	0.351514010309244	0.768448591714384	0.442220721331014	0.719992073256239
ENSMUSG00000006276.9	96.9954798785762	-0.1009362513831	0.369317563951347	-0.273304768674358	0.784618949959651	0.923586883247612
ENSMUSG00000006281.7	35.2764004936378	-1.39461801551241	0.527826254379755	-2.64219144830379	0.00823714802769101	0.0810900749931128
ENSMUSG00000006288.7	58.7525208987856	-0.239180261445226	0.424243244226571	-0.563780955148197	0.57290321450491	0.803982312578294
ENSMUSG00000006289.13	35.6178897810913	0.318575647492184	0.502476759383902	0.6340107110283	0.526073831969202	0.776337070244647
ENSMUSG00000006299.12	180.023992066925	-0.105137045619789	0.314146481977145	-0.334675228441482	0.737870089735128	0.901589607503789
ENSMUSG00000006301.16	4.45735600856067	0.703077686136151	1.26821159519955	0.554385158436849	0.579315281079168	NA
ENSMUSG00000006304.13	563.359679270411	-0.389164483658621	0.266529700478837	-1.46011676357068	0.144257986175422	0.421193197309908
ENSMUSG00000006307.15	106.802236443634	-0.753766067780012	0.440462912315055	-1.71130428171182	0.0870249563635729	0.32054886239501
ENSMUSG00000006315.8	36.7939303699099	-0.291276581611622	0.500257213478928	-0.582253636256444	0.560395850004253	0.79718769053577
ENSMUSG00000006333.13	1141.5152000421	1.71075883706433	0.263822684604493	6.48450242112045	8.90250951174796e-11	6.63236958625223e-09
ENSMUSG00000006335.15	10.766061147488	-0.286080414431062	0.896290373524754	-0.319182736846789	0.749587946869125	NA
ENSMUSG00000006342.13	2.49175919001091	1.01096478778543	1.72733474706177	0.585274388479191	0.558363233124095	NA
ENSMUSG00000006356.9	6.26246753856408	-0.0397931277313176	1.16628336751015	-0.0341196049260913	0.972781775115683	NA
ENSMUSG00000006360.10	98.9541254193935	-0.0272999525176767	0.382953362351108	-0.071287930076057	0.943168601193299	0.983380655284056
ENSMUSG00000006373.10	35.4165829232879	-0.201094895194664	0.510562243885964	-0.393869498974507	0.693677390202635	0.874795860394285
ENSMUSG00000006378.12	2.45088328114344	2.96723775788039	1.89446851194279	1.5662639622537	0.117286834042256	NA
ENSMUSG00000006390.14	47.1165011063399	-0.511518008845544	0.527252925851083	-0.970156795279723	0.331968342631492	0.635618224800681
ENSMUSG00000006392.15	38.0843143500826	0.423123244419685	0.49920655728231	0.84759151947678	0.396665498902043	0.686988353741483
ENSMUSG00000006395.15	8.30679552312666	-1.49886884849026	1.02497606538773	-1.46234521868886	0.143646633055574	NA
ENSMUSG00000006398.14	9.96783111498501	0.211327917986392	0.889412890917115	0.237603839729017	0.812188372123549	NA
ENSMUSG00000006412.9	44.6005113873506	0.0889648393872915	0.599403041208171	0.148422402408856	0.882009421307007	0.962893291660852
ENSMUSG00000006418.16	74.3825027751738	0.913268818053144	0.393814074679463	2.31903549611953	0.0203931117426268	0.141040895708634
ENSMUSG00000006423.14	30.9609246753388	0.395964558017199	0.530192053991018	0.746832313001634	0.455164787874511	NA
ENSMUSG00000006442.10	72.4479684636361	0.563311806057628	0.610820302901831	0.922221811196347	0.356412888354699	0.654060838820165
ENSMUSG00000006456.10	73.3837082837698	-0.356662788960856	0.402220092686003	-0.886735385542484	0.375221382441583	0.672283772497158
ENSMUSG00000006463.12	2.46617952165484	0.00393722734848901	1.64878246520088	0.00238796046876282	0.998094685020964	NA
ENSMUSG00000006471.16	43.0232222183114	-0.0151695271296705	0.478519763985554	-0.0317009416775698	0.97471054391538	0.995838974197111
ENSMUSG00000006494.10	49.8904356046105	-0.671612440937983	0.533048430260161	-1.25994638162651	0.207688705312777	0.507037066511479
ENSMUSG00000006498.15	548.038748063095	0.582272849072478	0.260409500146848	2.23598927360226	0.0253524737919203	0.158041191669502
ENSMUSG00000006517.4	4.83966662628927	2.04571581925884	1.28067788974753	1.59736951472015	0.110183363712721	NA
ENSMUSG00000006519.10	190.333446660769	-0.963301447134487	0.347868467152127	-2.76915425827666	0.00562020188122938	0.0630090108965983
ENSMUSG00000006526.10	4.4406363967302	-1.00428331104399	1.29845855463996	-0.77344271594595	0.43926041813867	NA
ENSMUSG00000006527.13	36.4505712521256	0.72567156449056	0.517929119041135	1.40110207712211	0.161183550571641	0.444216479767548
ENSMUSG00000006585.2	51.4679796552509	-0.69967023459668	0.446880502861187	-1.56567634997944	0.117424405673535	0.380887169807626
ENSMUSG00000006589.7	35.3540645397844	0.817359742799324	0.605434562064357	1.35003812800572	0.17700375299672	0.465224307918515
ENSMUSG00000006599.12	60.2821926151647	0.124237787247773	0.461807786454905	0.269024886309284	0.787910531902271	0.924348505662345
ENSMUSG00000006641.11	12.7156672633133	-0.580886422530009	0.92565152756102	-0.627543308938921	0.530303156419626	NA
ENSMUSG00000006651.7	2.44343018363247	0.878361161504212	1.66818274796178	0.526537732498081	0.598514642578701	NA
ENSMUSG00000006673.13	251.440700965468	-0.260514058036403	0.289458582105284	-0.900004609093425	0.368117797875055	0.66549358449506
ENSMUSG00000006676.15	217.743919170227	-0.131933604421444	0.375871773126244	-0.3510069493224	0.725583134900491	0.893983884239156
ENSMUSG00000006678.6	15.7574880971252	-0.122954761612513	0.737697873858561	-0.166673601713657	0.867626877735509	NA
ENSMUSG00000006699.16	327.006397576635	0.191885139631522	0.305576750666093	0.62794417184309	0.530040513070343	0.779699722889145
ENSMUSG00000006705.11	65.8817877725684	-0.491032474172947	0.401549154957921	-1.22284524350301	0.221388153309026	0.522627996025878
ENSMUSG00000006715.10	8.15783881567862	0.532229156193318	1.03502558195147	0.514218358921948	0.607099333500872	NA
ENSMUSG00000006717.6	9.08345408395662	-0.652103709595315	1.08190173401914	-0.602738390272123	0.546682738202501	NA
ENSMUSG00000006728.11	53.0167589472398	-1.21708932072888	0.431275976926058	-2.82206611507497	0.00477153392373332	0.0563675580402154
ENSMUSG00000006731.9	347.93370243099	-1.30050560793408	0.323019125515854	-4.02609475787912	5.6710842964561e-05	0.00172333057080751
ENSMUSG00000006732.13	17.5812610966631	1.68102613288194	1.00099517256553	1.67935488497263	0.0930829002679623	NA
ENSMUSG00000006736.8	18.6766739783014	0.145257624144162	0.715441000311841	0.203032289288493	0.839109794574646	NA
ENSMUSG00000006740.12	186.197179796295	0.289750468986903	0.305945742899348	0.947064882292633	0.343605718138316	0.644121271136722
ENSMUSG00000006763.11	11.1119291880074	-0.107006082426169	0.814407883449234	-0.131391265483543	0.895465797897697	NA
ENSMUSG00000006782.15	169.876764121423	-0.692526614942168	0.329696308066867	-2.10049854365283	0.0356850085912969	0.195526755258838
ENSMUSG00000006818.4	52.8424844384903	0.485099636827263	0.446428589284297	1.08662314303159	0.277203392859038	0.586264867955996
ENSMUSG00000006850.7	19.6019070231198	-0.593684412935423	0.659231220142643	-0.900570838873443	0.367816545123237	NA
ENSMUSG00000006906.9	8.61451993165691	-0.833281638633001	1.03812224446064	-0.802681613922969	0.422158782582191	NA
ENSMUSG00000006920.13	87.7488414491231	-0.655453880103086	0.379485353851517	-1.72721785821423	0.0841285447844578	0.314439773151681
ENSMUSG00000006932.15	427.944211925228	0.349887556289997	0.276241594804433	1.26659982736381	0.205298414220149	0.503853602711689
ENSMUSG00000006941.4	24.3712775318889	0.242467198397111	0.628077816947892	0.386046429048181	0.699462283579353	NA
ENSMUSG00000006998.14	169.678705384116	0.197618046114334	0.325135291293014	0.607802509928828	0.54331846441986	0.785473548405425
ENSMUSG00000007029.15	209.326962859469	-0.617586956526253	0.321036185837368	-1.92373004593044	0.0543884298522034	0.243924550182092
ENSMUSG00000007036.14	42.4814507269324	0.126809377072377	0.494812190928737	0.256277794680771	0.797736342115097	0.92561399359444
ENSMUSG00000007038.5	34.0670001696375	-1.09523383847752	0.520912145555728	-2.10253081603442	0.03550680313986	0.19536019745695
ENSMUSG00000007041.9	217.503895264217	-0.586301751764929	0.303358432413144	-1.93270299790594	0.0532727956838939	0.241242199278339
ENSMUSG00000007050.16	12.7215269961869	-1.2107446448115	0.947056397169434	-1.27842929780125	0.201098099252268	NA
ENSMUSG00000007080.13	18.643371712135	-0.517098366822348	0.666867900390687	-0.775413491216783	0.438095365647735	NA
ENSMUSG00000007207.9	5.18837505228682	0.300827440787887	1.34068019728957	0.224384190499767	0.822458371235819	NA
ENSMUSG00000007216.5	6.42808512098153	-1.17936178190958	1.23784924313611	-0.952750739598666	0.340716378409799	NA
ENSMUSG00000007338.9	11.2461545954455	0.658521337739377	0.831322844660441	0.79213670353105	0.428280970853272	NA
ENSMUSG00000007411.14	65.6241947197436	-0.43757969073847	0.448742762564074	-0.975123672721048	0.329498917358138	0.632123756752475
ENSMUSG00000007415.14	19.6957176125177	-0.583518880310531	0.666151024380673	-0.875955840273658	0.381054040963402	NA
ENSMUSG00000007458.13	214.874868657628	-0.178136144293606	0.305722832423241	-0.582672032970685	0.5601141036466	0.79718769053577
ENSMUSG00000007564.13	309.179948082921	0.0361794094298902	0.287449558485128	0.125863506698557	0.8998399703292	0.967869152871459
ENSMUSG00000007570.14	3.30530160529099	-0.976400354527671	1.48623447571527	-0.65696252541697	0.511205012788627	NA
ENSMUSG00000007589.8	62.7738932648761	0.69286170554852	0.452631034797473	1.53074281762084	0.125832967026626	0.392737920643878
ENSMUSG00000007603.8	32.86304045632	-0.598134306633647	0.529903299121302	-1.12876124308999	0.25899856621306	0.568050511556563
ENSMUSG00000007610.14	14.3329093049836	-0.711579812662382	0.743846279508506	-0.956622130492548	0.338758014579837	NA
ENSMUSG00000007613.14	50.3915315949887	0.574453928841888	0.438715164333181	1.30940066709347	0.190398665631182	0.48215539284563
ENSMUSG00000007617.16	11.7494031373951	-0.257160254625292	1.01747118534012	-0.252744508474044	0.800465651411983	NA
ENSMUSG00000007656.12	48.1804782889965	-0.498680282339374	0.458149568488105	-1.08846611813915	0.276389386268413	0.585378929221051
ENSMUSG00000007659.17	41.935363694002	-0.785397257991476	0.57861314610713	-1.35737886924204	0.174660858825652	0.462590886992941
ENSMUSG00000007670.9	183.973878604601	-0.762967385161711	0.390975406223693	-1.95144598104257	0.0510040162228729	0.236533685676155
ENSMUSG00000007721.5	21.4735767554219	0.0228154004953452	0.682239586841087	0.0334419182577565	0.973322182406944	NA
ENSMUSG00000007739.9	354.033114093654	1.05730008189894	0.263786393174352	4.00816762826772	6.11916819062239e-05	0.00182351212080547
ENSMUSG00000007777.8	1.97466100651281	-4.13790664100465	2.01766497789169	-2.0508393050111	0.0402825984691699	NA
ENSMUSG00000007812.15	52.3122524396672	0.578009965969305	0.456437225583055	1.26635150152565	0.205387266044909	0.503853602711689
ENSMUSG00000007815.12	377.166912794053	-0.149344083121576	0.287899022431975	-0.51873772220558	0.603943652383942	0.824958554418065
ENSMUSG00000007817.13	43.1841638138671	-0.958624234345887	0.527997526657313	-1.81558470626713	0.0694341013900715	0.280148708337411
ENSMUSG00000007827.10	5.90618539061059	-0.732463189397296	1.20006703194682	-0.610351896934497	0.541628725726817	NA
ENSMUSG00000007833.12	29.0798838071815	-0.812291257415493	0.559545457331754	-1.45169842194588	0.146585478299721	NA
ENSMUSG00000007836.6	432.213276764075	0.093728282785618	0.321108685011291	0.291889591159213	0.770371042166698	0.917335355444181
ENSMUSG00000007850.15	254.821428075823	1.19155763382753	0.321097253050702	3.71089326522323	0.000206529177082752	0.00507424611141081
ENSMUSG00000007872.3	43.8433375481026	1.14800924921352	0.586055381357006	1.95887502398717	0.0501274246602349	0.236023011728466
ENSMUSG00000007880.15	304.440503343198	-1.36992816143262	0.384826439358124	-3.55985977397398	0.000371052873497854	0.00791113452002832
ENSMUSG00000007891.14	172.025298742925	0.289891342157105	0.419252115671199	0.691448728154908	0.489283590880718	0.751203465453597
ENSMUSG00000007892.7	680.276979395349	1.76145028979501	0.310557169800267	5.67190347248422	1.41219545109968e-08	8.58280366924922e-07
ENSMUSG00000007950.8	20.2107457859891	-1.77650925952582	0.755343881663999	-2.35192116154066	0.0186767329826907	NA
ENSMUSG00000008035.11	11.4616980671515	0.302431179766994	0.821118134215529	0.368316283814542	0.712637411928148	NA
ENSMUSG00000008036.10	63.831338483728	-0.647714354489513	0.41497478777379	-1.56085230614683	0.118558602675584	0.383020294929087
ENSMUSG00000008129.13	2.54727824408897	0.58873436431119	1.63177517654225	0.360793798541981	0.71825359905007	NA
ENSMUSG00000008136.13	5.23625675480367	1.24693451954628	1.34341308146807	0.928183993998059	0.353312135666987	NA
ENSMUSG00000008140.16	66.9015804388808	-0.153016588993615	0.406163664175577	-0.376736282661339	0.706369596491474	0.884233561162181
ENSMUSG00000008153.10	2.58574933321423	-1.17498306484832	1.71945828392489	-0.683344909168872	0.494388922663078	NA
ENSMUSG00000008167.13	7.11559427354627	-1.72220882088545	1.06248549462193	-1.62092454871421	0.105033821296921	NA
ENSMUSG00000008200.13	157.365858484884	0.796213890975763	0.382387028928327	2.08221992573132	0.0373223860410063	0.199822310430257
ENSMUSG00000008206.14	21.8486489956563	0.473958654989089	0.621812227877288	0.762221509549701	0.445927810502911	NA
ENSMUSG00000008226.13	3.32824189888121	-1.12168624759112	1.65381403134375	-0.678242067325874	0.497618223927697	NA
ENSMUSG00000008301.10	44.3504072733434	0.606770933409355	0.496588954692034	1.2218776267097	0.22175390734032	0.522859263912678
ENSMUSG00000008305.17	11.2399679323443	0.873493441354431	0.907179768947874	0.962866976594383	0.33561428388202	NA
ENSMUSG00000008318.8	9.18817866985896	0.434227893051527	0.890138162534651	0.487820780332652	0.625676790983707	NA
ENSMUSG00000008333.11	76.6932954062616	0.9863993904063	0.404669411123837	2.43754374136384	0.0147874250614533	0.113838527264755
ENSMUSG00000008348.9	290.429663695126	-0.0180356823748128	0.347038528244983	-0.0519702595156263	0.958552390846502	0.990610538905226
ENSMUSG00000008373.15	77.5874217369325	0.106658907975147	0.37728500591869	0.282701157750576	0.777405928679894	0.921436485648558
ENSMUSG00000008384.8	42.9134595898199	0.197745385909935	0.47504421886886	0.416267324294128	0.677214400128897	0.867217442249896
ENSMUSG00000008393.8	8.90238421829847	0.538633880431625	0.951916980040387	0.565841235869931	0.571501711849502	NA
ENSMUSG00000008398.13	21.5723706916095	-0.715917420787422	0.639044317109182	-1.12029385383785	0.26258856031835	NA
ENSMUSG00000008429.7	31.6388007578569	-0.726596872949679	0.537878331098637	-1.35085730534186	0.176741147014928	NA
ENSMUSG00000008435.14	12.0193801972678	0.264900292746377	0.831476546370645	0.318590216287705	0.75003727342217	NA
ENSMUSG00000008450.7	6.37488933566252	0.769593142067146	1.09898523098195	0.700276146003812	0.483754865763516	NA
ENSMUSG00000008475.12	121.772040779259	0.00348952280133491	0.341408443122185	0.010220962227598	0.991844994031918	0.998450762580816
ENSMUSG00000008496.17	24.1582765893529	-1.2821836331177	0.691832364294166	-1.85331548405636	0.0638371530987545	NA
ENSMUSG00000008604.10	56.5835953950652	-0.755426892012937	0.419006370539628	-1.80290073165246	0.0714038060915771	0.284063841519004
ENSMUSG00000008668.13	476.975832134841	2.10673646601023	0.320302199713532	6.57733998672014	4.78938818337684e-11	3.80345201780204e-09
ENSMUSG00000008682.12	336.803078278514	1.72343457882768	0.30994537446942	5.56044619726281	2.69085799134346e-08	1.55363413275193e-06
ENSMUSG00000008683.15	1540.31388180137	2.64649652821964	0.29994831015131	8.82317532272347	1.1125894827551e-18	3.95311601603523e-16
ENSMUSG00000008690.14	100.960617516859	-0.507172489596803	0.371862671428094	-1.36387039777095	0.172608359017132	0.459910145428423
ENSMUSG00000008730.16	124.162818462072	-0.895509731527025	0.358065258294425	-2.50096794029282	0.0123854389831505	0.103294252877283
ENSMUSG00000008734.8	2.8290371132504	-1.98024741830772	1.73940063372913	-1.13846538854147	0.254926203495207	NA
ENSMUSG00000008763.15	39.9771784796431	0.0741806015057929	0.521501203438239	0.142244353448703	0.886886998962796	0.963062061143215
ENSMUSG00000008822.14	4.2998527660649	-0.949918209856821	1.29405509239135	-0.734063190541154	0.462910226383888	NA
ENSMUSG00000008855.16	65.7365901931984	-0.669082890478479	0.488527470087296	-1.36959113140335	0.170814569565808	0.457917873955002
ENSMUSG00000008859.7	33.3128015159227	0.01485366491181	0.532490418859492	0.0278947083097272	0.977746128959879	0.996364142130459
ENSMUSG00000008892.10	30.4587843946616	0.114335372919335	0.562216558634719	0.203365360132732	0.83884947266621	NA
ENSMUSG00000008958.13	35.3782772744891	-0.33736880045553	0.531184869506332	-0.635125019221785	0.525346880685111	0.775759987814746
ENSMUSG00000008976.15	76.1965878317789	0.297325869499712	0.387923399241607	0.766455104489665	0.44340555557827	0.720715473386301
ENSMUSG00000009013.5	44.8174687553305	0.714194274992356	0.482913231394761	1.47892877759759	0.13915935112208	0.412565496041648
ENSMUSG00000009030.13	35.7931952426541	-0.230496074210692	0.592478089975827	-0.389037296248535	0.697248556930395	0.877067288796704
ENSMUSG00000009035.12	24.5845612709376	-0.673343270139197	0.591083855956471	-1.13916707985471	0.254633473393942	NA
ENSMUSG00000009073.15	11.5981866141111	-0.0736389142506733	0.891069400188121	-0.0826410538114391	0.934136956683106	NA
ENSMUSG00000009076.9	21.3382133056178	-0.0861289011616141	0.694183158241257	-0.124072300140247	0.901258029952969	NA
ENSMUSG00000009079.15	576.662874873118	0.226421989686928	0.259843400742123	0.871378642060019	0.383547443563616	0.676960505089929
ENSMUSG00000009090.16	162.811208558396	0.195669344260192	0.330946655961185	0.59124133976184	0.554358727457263	0.792750143072785
ENSMUSG00000009112.3	35.4714802186902	0.282784513030347	0.535075719726968	0.528494384261432	0.597156243762978	0.820901106103888
ENSMUSG00000009207.14	21.1710340135192	0.217740011114398	0.627123249587432	0.347204494902147	0.72843769421077	NA
ENSMUSG00000009291.11	32.2515470785354	0.345228362656855	0.542484901186832	0.636383357217086	0.524526585717634	0.775292255817521
ENSMUSG00000009293.16	25.722873331136	0.442445961962702	0.594316061946004	0.744462400215089	0.456596780199362	NA
ENSMUSG00000009350.12	8.22177446486702	-1.28537602308847	1.13089648943952	-1.13659918046568	0.255705882829336	NA
ENSMUSG00000009406.12	6.3205030928811	-0.66045197576307	1.18470101370277	-0.557484097779942	0.577196721061237	NA
ENSMUSG00000009470.15	236.050165026132	0.751736518524813	0.291958142232238	2.57480922702558	0.0100295388740069	0.0908361569785052
ENSMUSG00000009535.12	59.6774835571068	0.514142298816754	0.422315131854185	1.21743754849465	0.223437784090896	0.524153948560615
ENSMUSG00000009549.13	45.1506138277951	-0.265843522514694	0.480815572209323	-0.552901232572724	0.580331043390727	0.809965366190303
ENSMUSG00000009555.15	97.843692200102	0.082859752988103	0.403790453696396	0.205204833917158	0.837412092890628	0.943235576708995
ENSMUSG00000009563.15	18.8184961760285	-0.399158527143809	0.643842064404515	-0.619963418378057	0.53528187137749	NA
ENSMUSG00000009566.11	30.2291887358532	0.316812202830971	0.550493968058997	0.575505311980127	0.56494959914951	NA
ENSMUSG00000009569.13	22.9539050797585	-1.47295802067163	0.619259265278091	-2.37858051265518	0.0173794411210208	NA
ENSMUSG00000009575.13	8.62474951288336	-1.44040352055257	1.01740826332576	-1.41575763877138	0.156846476185199	NA
ENSMUSG00000009585.16	52.7989835099767	-0.877956636650468	0.442047115377442	-1.98611552051601	0.0470204983004667	0.227183767416167
ENSMUSG00000009614.15	2.84420308099609	-0.127804262029892	1.66925525362175	-0.0765636422306282	0.938970683315839	NA
ENSMUSG00000009630.9	65.0061490397344	0.463230143410832	0.416042218476061	1.1134210011369	0.265527659512668	0.575084231309354
ENSMUSG00000009640.10	34.0417716360775	-0.260896632131588	0.501567421278646	-0.520162636294208	0.602950224825896	0.824469511046044
ENSMUSG00000009647.12	17.566678743414	0.597364860093508	0.742883824490559	0.804116122064117	0.421329914464	NA
ENSMUSG00000009681.9	21.6673258025682	-0.327633851537366	0.68961587291248	-0.47509615774019	0.634718436999891	NA
ENSMUSG00000009687.13	442.517101113113	-0.389204638751888	0.393705798203382	-0.988567200503436	0.322874940455556	0.625832710853636
ENSMUSG00000009733.8	4.91022400797889	-1.40318612562756	1.22662997713327	-1.14393594791064	0.252650201451372	NA
ENSMUSG00000009739.15	33.6447343890666	-1.12173867637044	0.590009828911814	-1.90122032109079	0.057273160459545	0.250278834590954
ENSMUSG00000009741.13	89.0269268084768	0.330204221976376	0.396711671678362	0.832353181290046	0.405209620595114	0.693208606492159
ENSMUSG00000009772.14	3.29329672932709	0.539604088788916	1.41849124149096	0.380407064214048	0.703643271604684	NA
ENSMUSG00000009828.14	4.39304173079549	-1.25476521658935	1.37593311642503	-0.911937652790494	0.361801539066505	NA
ENSMUSG00000009863.13	136.641656428789	0.00607257198128727	0.371536364311203	0.0163444888969221	0.986959565266176	0.997105475057845
ENSMUSG00000009894.14	13.5469819012638	-1.368861222376	0.771535396428667	-1.77420404651851	0.0760294051285936	NA
ENSMUSG00000009905.5	26.5363453129073	0.164792442068076	0.579600456518575	0.28432075961071	0.776164578466868	NA
ENSMUSG00000009907.16	126.314559713283	-0.327046127698073	0.344447638237061	-0.949479953969049	0.342376562697932	0.643645642288054
ENSMUSG00000009927.8	515.77700042956	1.93621697380511	0.292761132183588	6.61364081824536	3.74980950445922e-11	3.09292323233878e-09
ENSMUSG00000009995.16	19.4717411662606	-0.993571233790333	0.64598751129462	-1.53806570006148	0.124032551501988	NA
ENSMUSG00000010025.17	44.6641267352371	-0.328034512701923	0.463895650850512	-0.707129959292571	0.479485719589345	0.744702265898852
ENSMUSG00000010045.2	32.0945175688067	-0.117018572718663	0.517180663113823	-0.22626246699581	0.820997288434581	0.934726762454851
ENSMUSG00000010047.11	5.13794945491295	-0.835578360695689	1.23993677547133	-0.673887876563757	0.500382600311538	NA
ENSMUSG00000010048.9	28.9499255703649	0.243628111632829	0.74867532480298	0.325412236201242	0.744869095893507	NA
ENSMUSG00000010054.4	7.43827036112956	-1.12096502194659	1.06248350678835	-1.05504228045385	0.291405988163581	NA
ENSMUSG00000010057.7	27.3481398013114	-0.380145504224834	0.588845032527686	-0.645578179700379	0.518552572386622	NA
ENSMUSG00000010067.12	21.4176999724674	0.936238200278558	0.624774647393646	1.49852143358287	0.133997828165872	NA
ENSMUSG00000010095.12	579.844347983985	0.664642409041986	0.296962279088198	2.23813748696543	0.0252120907197935	0.157943020831268
ENSMUSG00000010097.12	208.428497954175	0.795566781863928	0.312323028269504	2.54725623746653	0.010857367754787	0.0948018556887731
ENSMUSG00000010110.16	98.9842851416108	-0.00392372671311268	0.363799994269392	-0.0107853952031873	0.991394666521087	0.998450762580816
ENSMUSG00000010142.11	4.47304096145491	-1.0689654578222	1.33546748000758	-0.800442896457603	0.423454235904865	NA
ENSMUSG00000010205.10	198.286731188303	-0.724786770875813	0.450489769051427	-1.60888619602163	0.107641228416166	0.36318103291035
ENSMUSG00000010277.7	160.576946301583	-0.898048373595274	0.356196359761141	-2.52121715729349	0.0116949653420859	0.0999380708580066
ENSMUSG00000010290.7	14.787627230624	1.36759073194247	0.737526404608373	1.85429392547465	0.0636971207135155	NA
ENSMUSG00000010307.5	1.85773820014941	0.109026105058123	2.02477426495676	0.0538460543207524	0.957057816676285	NA
ENSMUSG00000010358.12	53.9852298854939	0.407446631524567	0.437590678831664	0.931113598243045	0.351794805227927	0.649364120337147
ENSMUSG00000010362.8	7.16923498637491	-0.0984197759034836	1.0455786957802	-0.0941294771026719	0.925006304989421	NA
ENSMUSG00000010376.13	27.1219068095481	0.236567768060849	0.604791116889796	0.391156155330826	0.695681814566737	NA
ENSMUSG00000010392.8	36.0902468509512	0.223258315583754	0.513218633787011	0.435015996859553	0.663550816064525	0.861960794064842
ENSMUSG00000010406.10	36.2563701809472	2.23155867435049	0.579149610009212	3.8531644255359	0.00011660103149792	0.00317886983538589
ENSMUSG00000010453.11	93.9968626010081	-0.201495854340307	0.3665880989732	-0.549651925157117	0.582558136682593	0.81097565478741
ENSMUSG00000010517.7	62.9000132667189	-0.49882544989509	0.416675758662564	-1.19715495688112	0.231246162649634	0.532382003550036
ENSMUSG00000010554.13	39.7744274430912	-0.493202452697125	0.504949723705929	-0.976735761092038	0.328699986043181	0.631623330513025
ENSMUSG00000010608.14	131.147880885364	0.791318742386862	0.414047960058201	1.91117652717243	0.0559818992893244	0.247919839709865
ENSMUSG00000010609.14	40.3224904993553	-0.442266335291051	0.484304095833946	-0.913199659254362	0.36113754313295	0.658805020430923
ENSMUSG00000010663.4	7.51756409903614	0.239328006733543	0.987630090404456	0.242325551903277	0.808527916134256	NA
ENSMUSG00000010751.13	15.1278674221397	0.54982849827301	0.814611953536667	0.674957562169213	0.499702727542186	NA
ENSMUSG00000010755.15	226.17648940105	0.205623615210775	0.323941886736856	0.634754638500352	0.525588452259691	0.775868667621449
ENSMUSG00000010911.11	6.74733491531385	-0.21007871621674	1.05186525087125	-0.199720179027433	0.841699431136651	NA
ENSMUSG00000010914.9	18.3394657102905	0.747035268717302	0.655470397098388	1.13969337444414	0.254414068436853	NA
ENSMUSG00000010936.10	63.2171834587971	-0.732259662050659	0.431730205290899	-1.69610477348293	0.0898660398164347	0.32607324266466
ENSMUSG00000011008.12	1.97235596931864	1.20002689085945	1.92362537310674	0.623836068933398	0.532735249341573	NA
ENSMUSG00000011096.15	14.0799086874708	-0.427080636176008	0.755699931482758	-0.565145791846286	0.571974604165601	NA
ENSMUSG00000011114.16	144.202387920106	0.225111280931823	0.36406922598882	0.618319992085066	0.536364425976936	0.781991878996664
ENSMUSG00000011148.12	2.97855700884439	-0.452480231985456	1.57030561806594	-0.288147878209053	0.77323354452996	NA
ENSMUSG00000011158.7	51.3101602805052	-0.171214799422761	0.538977320551094	-0.317666055498768	0.750738262236694	0.907559514693679
ENSMUSG00000011179.7	960.453735547992	0.298381800239672	0.262912771223143	1.13490797290492	0.256413878992334	0.564526075817727
ENSMUSG00000011254.15	11.0719780670932	-0.628426539579903	0.862243171251128	-0.728827505433353	0.46610718419665	NA
ENSMUSG00000011256.15	28.9897959908664	-0.319451646242562	0.641222193697523	-0.498191811485012	0.618348853438794	NA
ENSMUSG00000011257.18	18.6713607463117	1.33199743942796	0.759458845527747	1.75387704978583	0.0794515768879969	NA
ENSMUSG00000011306.6	56.1936288258714	-0.457774352305066	0.433602641684872	-1.05574622545257	0.291084172032356	0.599507049695211
ENSMUSG00000011427.14	13.1964534102157	0.253454940034197	0.821588612094296	0.308493735554732	0.757706666270616	NA
ENSMUSG00000011658.13	8.00060376859387	-0.985191867388222	1.06253891898371	-0.927205441406826	0.35381987816701	NA
ENSMUSG00000011751.15	30.7701545777816	-4.04498624470476	2.44209396703112	-1.65635978767119	0.0976489794376354	NA
ENSMUSG00000011752.6	157.85315275009	0.522078329296062	0.347200512843383	1.5036796029491	0.132663883593919	0.403910456342287
ENSMUSG00000011832.14	7.26029145275349	-0.686271352550999	1.0591099780887	-0.647969867859674	0.517004439447911	NA
ENSMUSG00000011837.3	21.2219390839136	-0.201155561047557	0.639063762831608	-0.314766026094584	0.752939308708027	NA
ENSMUSG00000011877.12	52.6155336627829	-0.718467078686955	0.494976319031518	-1.45151808493126	0.146635650083465	0.423318792334702
ENSMUSG00000011884.12	50.4286475549412	-0.90927767995864	0.453591197635378	-2.00461932396133	0.0450037591831737	0.222662715062473
ENSMUSG00000011958.16	42.4255778421312	0.306363695127018	0.477462516542419	0.641649730633462	0.521100635526513	0.773694579073276
ENSMUSG00000011960.11	102.659906735729	0.582722908232149	0.35924201445235	1.62209008075096	0.104784061735849	0.358793316882495
ENSMUSG00000012076.7	3.5722094245594	0.263368238826518	1.37913048958443	0.190966874284592	0.848551546000866	NA
ENSMUSG00000012114.15	89.1184856998204	-0.943049158756531	0.420947378579507	-2.24030177343986	0.0250713382002418	0.157771813551658
ENSMUSG00000012117.12	17.3141049122771	-0.554651732935237	0.688487578823591	-0.805608917277726	0.420468382290966	NA
ENSMUSG00000012126.15	4.20561359468478	-1.38626519744448	1.36044934105313	-1.01897597772466	0.308214371185908	NA
ENSMUSG00000012296.14	28.7517023558535	-0.572537477618579	0.567791279114385	-1.00835905495343	0.313282121913537	NA
ENSMUSG00000012405.14	175.279056032563	1.85537549265435	0.3474600007832	5.3398246948489	9.30365010654938e-08	4.99692556304088e-06
ENSMUSG00000012422.13	23.9852529743554	0.500913289592827	0.64996986745392	0.770671556752344	0.440901635272456	NA
ENSMUSG00000012429.8	11.3619333818461	0.5914860765053	0.845701534257455	0.699402865603926	0.484300297500841	NA
ENSMUSG00000012443.3	17.4100636795328	0.00118953348346304	0.692660970286578	0.00171733869019773	0.998629762646951	NA
ENSMUSG00000012483.4	13.2780716943676	-0.0835960711946085	0.805117121628936	-0.103830944528263	0.917303509002234	NA
ENSMUSG00000012535.13	124.918315205952	0.0178909237092016	0.365311517041236	0.0489744310666834	0.960939672534271	0.99141843811387
ENSMUSG00000012609.17	7.60990046878357	-1.08510297444144	1.12025726464679	-0.968619449018766	0.332735095832335	NA
ENSMUSG00000012640.15	47.6822002776332	0.99668342569793	0.470200375126627	2.11969934185935	0.0340314085438675	0.190406774464781
ENSMUSG00000012848.13	1266.95124100951	1.96411927455829	0.252119823461631	7.79041983922855	6.67869007247635e-15	9.34814225599039e-13
ENSMUSG00000013033.15	34.0347512171598	-2.10600856107222	0.693485840951454	-3.03684435457659	0.00239068865648513	0.0337522494232955
ENSMUSG00000013089.14	4.14854937823416	-1.41156836130105	1.42937884603979	-0.98753970314582	0.323378129135594	NA
ENSMUSG00000013150.14	4.07379600731741	-1.57849097945654	1.61312489838841	-0.978529921045501	0.327812300240711	NA
ENSMUSG00000013155.9	1.6384122461927	-2.19887257438952	2.33085007596347	-0.943377953419249	0.345487615777857	NA
ENSMUSG00000013160.7	97.3472571593436	0.727634216112903	0.45130504057404	1.61228914081568	0.1068990352439	0.361959940613117
ENSMUSG00000013236.15	20.5993093787109	-0.759641411103717	0.638630687200235	-1.18948466825795	0.234249000657293	NA
ENSMUSG00000013275.9	62.1270456567701	-0.780753219824589	0.534098282451348	-1.46181563483254	0.14379173848749	0.420536631428734
ENSMUSG00000013465.17	74.5765718005311	-0.361767290461448	0.418514695203963	-0.864407617240634	0.387364009895277	0.678768725988727
ENSMUSG00000013495.14	11.6517141517636	-1.40361991203274	0.843267045599753	-1.66450227049303	0.0960120977065355	NA
ENSMUSG00000013539.12	9.58392002907901	-0.989841486375624	0.892074736288673	-1.10959479750956	0.267173674121291	NA
ENSMUSG00000013593.11	99.0115757832418	0.178368479734803	0.363244334730253	0.491042702337697	0.623396245455324	0.835936179972072
ENSMUSG00000013622.14	21.4775360918794	-0.201736009777486	0.621518951435384	-0.324585451998819	0.745494839190491	NA
ENSMUSG00000013629.15	97.5641773833997	-0.0255580529642027	0.445233926510461	-0.0574036510750988	0.954223654662802	0.988804167811927
ENSMUSG00000013646.16	13.8669073266328	-0.096795458826665	0.794212199399398	-0.121876066496919	0.902997170473516	NA
ENSMUSG00000013662.5	80.02964334393	0.874129611779815	0.390623345180809	2.23778128615227	0.0252353213625192	0.157943020831268
ENSMUSG00000013663.7	46.6264276706597	-0.0394974588247079	0.476131345582083	-0.082954964404667	0.933887349329271	0.980815294804889
ENSMUSG00000013698.11	27.5879565254171	-0.15034409516025	0.613934370327716	-0.24488626541628	0.806544496572107	NA
ENSMUSG00000013701.11	29.0479399859285	0.566377830781753	0.570647986571014	0.992517005422346	0.320945388176346	NA
ENSMUSG00000013707.3	66.3930413002213	-0.589330497927907	0.431838117716133	-1.36470235894114	0.172346617934633	0.459910145428423
ENSMUSG00000013736.15	67.8611671620564	0.353211578644559	0.40360168718217	0.875148915036951	0.3814928848237	0.676729427302947
ENSMUSG00000013787.14	83.9719396975486	-0.767095700859158	0.399379867261595	-1.92071700088154	0.0547673951052743	0.245145169458539
ENSMUSG00000013822.6	10.0542127562489	0.806054050719569	0.862371578050376	0.934694592488626	0.349945714469081	NA
ENSMUSG00000013833.14	37.2741525052267	-0.508646296475591	0.492030175965457	-1.03377053140599	0.30124345108789	0.606370807195488
ENSMUSG00000013846.9	18.6534408152875	-0.390373363111995	0.724130207301746	-0.539092775271183	0.589822840460839	NA
ENSMUSG00000013858.13	77.7243825474582	-1.11394030838449	0.407217994366146	-2.73548891207127	0.00622876847455685	0.0667533215405524
ENSMUSG00000013878.16	4.82251151684203	0.377410207767343	1.28123064264989	0.29456851499178	0.768323516864812	NA
ENSMUSG00000013973.11	21.3635084201991	-1.10618354480859	0.652961171203201	-1.69410310075596	0.0902456932253643	NA
ENSMUSG00000013997.9	25.2438725721994	-0.903086244881956	0.607554369277687	-1.48642868942844	0.137165765959499	NA
ENSMUSG00000014039.16	29.5448422715608	-0.311738202686543	0.641641066045188	-0.485845154219897	0.627076956872346	NA
ENSMUSG00000014074.16	15.7763584525147	0.854770212173489	0.780618958260699	1.0949903318746	0.273520872127873	NA
ENSMUSG00000014077.12	48.7568441494676	0.0505330359362084	0.46949349193967	0.107633091413974	0.914286746313515	0.973735411856612
ENSMUSG00000014164.13	6.95883865834198	-0.186407561151766	1.09873753337266	-0.169656133052608	0.865280574593498	NA
ENSMUSG00000014177.9	12.7053672360791	-0.638144405645621	0.768193494660257	-0.830707901175143	0.406138661736378	NA
ENSMUSG00000014195.14	83.7695086972412	0.145335631001615	0.408210085973382	0.356031455359708	0.721817008618562	0.892207336543906
ENSMUSG00000014226.9	63.5914431380787	0.84505888806556	0.437237310179459	1.93272364547004	0.053270250722178	0.241242199278339
ENSMUSG00000014232.13	4.64712057309972	-0.679834833913404	1.25734796198823	-0.540689494448608	0.588721620783312	NA
ENSMUSG00000014243.5	2.98638048165391	-0.0194650391814606	1.61549188686225	-0.0120489860331439	0.990386532682151	NA
ENSMUSG00000014245.8	3.45252619463139	0.159975787361008	1.55676441672242	0.102761718884748	0.918152088270509	NA
ENSMUSG00000014294.4	62.3244914228363	0.702157423844022	0.440761159885046	1.59305648443967	0.111147520192634	0.369775910694217
ENSMUSG00000014301.11	4.00466517379932	0.985295324180328	1.32176369193883	0.745439846917753	0.456005862762071	NA
ENSMUSG00000014313.13	77.7179556304455	0.896490428482929	0.421315647543963	2.12783558766206	0.0333507176132698	0.188091531936133
ENSMUSG00000014349.7	75.1816960014263	0.0813167350087476	0.393795553256202	0.206494802534866	0.836404424238134	0.942740857871142
ENSMUSG00000014353.13	37.6825443032105	0.819224230878726	0.556674806371794	1.47163877635874	0.141118448522295	0.414911593713865
ENSMUSG00000014355.9	181.701524517848	-0.577775856129419	0.320535794125854	-1.80253146986312	0.0714618280677815	0.284063841519004
ENSMUSG00000014402.13	80.2332037329202	0.213268661148836	0.390635778287505	0.545952708386767	0.585098445544224	0.812646018102784
ENSMUSG00000014418.14	34.832349933198	0.10049847776188	0.565245573331842	0.177796134111218	0.858883083510758	0.951257725281637
ENSMUSG00000014426.8	30.3687497585367	-0.776426764674925	0.615280075411151	-1.26190786229522	0.20698194255431	NA
ENSMUSG00000014444.15	86.0464185814342	-0.477671057491774	0.458462315372769	-1.04189819201037	0.297458882458237	0.603496843349587
ENSMUSG00000014470.4	33.1941646715435	0.176264044789952	0.523673743660637	0.336591335585805	0.736424988669927	0.901589607503789
ENSMUSG00000014496.7	59.8693956474591	-0.824579023726492	0.434939917213506	-1.8958458193703	0.0579804350778518	0.251466318896336
ENSMUSG00000014498.8	69.4482079408854	0.341428333867139	0.487440054442995	0.700451944305837	0.483645106322029	0.747454314303512
ENSMUSG00000014504.15	21.794082875598	0.741299515171223	0.662835213883212	1.11837678452285	0.263406105204731	NA
ENSMUSG00000014547.9	12.224990028274	-0.848845032114446	0.808950375515819	-1.04931656848937	0.294032442893328	NA
ENSMUSG00000014550.13	27.8108100993943	-0.694508940004849	0.614534812599426	-1.13013766798197	0.258418219682615	NA
ENSMUSG00000014551.8	10.6815324623663	0.207130119031442	0.89328542876508	0.231874507701069	0.816635484869935	NA
ENSMUSG00000014554.12	17.194098268893	-0.318044814999915	0.681359569548582	-0.466779699315925	0.640657501518172	NA
ENSMUSG00000014592.18	4.4600596553595	1.3420420813719	1.25500316052719	1.06935354713222	0.284910390632524	NA
ENSMUSG00000014599.9	2.35630114973908	2.44988211836419	1.8476489231163	1.32594568573782	0.184857688774688	NA
ENSMUSG00000014601.12	89.042026661792	-0.311465311178712	0.373286667651051	-0.834386379611795	0.404063289969834	0.692529994942733
ENSMUSG00000014606.13	33.9364540644342	-0.557058721372413	0.527487247740154	-1.05606102092316	0.290940337214157	0.599507049695211
ENSMUSG00000014609.15	2.49393498035747	-0.321262698955791	1.84964720021473	-0.173688635821196	0.862110169074838	NA
ENSMUSG00000014633.14	1.41836324239635	-3.11123840848541	2.24854222511639	-1.38366910513515	0.166459797689253	NA
ENSMUSG00000014668.14	56.9341426950285	-0.620284221459052	0.451434500823646	-1.37402927850516	0.169432593064462	0.455800318791352
ENSMUSG00000014748.12	34.8280689384949	0.086884099719803	0.527424180567197	0.164732871417399	0.869154242779164	0.956010727936873
ENSMUSG00000014763.7	30.7766171311215	-1.06304714126401	0.584145078991311	-1.81983411227166	0.0687842711750195	NA
ENSMUSG00000014767.15	30.8739976242809	0.866514254655901	0.571531830255795	1.51612597721475	0.129487500851076	NA
ENSMUSG00000014769.9	240.959488678249	1.10667680591691	0.318454536125221	3.47514850748349	0.000510570610772809	0.0102535897876505
ENSMUSG00000014771.11	40.4935150272602	0.94454888935847	0.484736313539114	1.94858289543487	0.0513452564323647	0.237639017496085
ENSMUSG00000014778.9	19.6251383272125	-0.231516364061602	0.693932723690754	-0.333629408381634	0.738659223878888	NA
ENSMUSG00000014791.9	5.30567603410607	-1.02102321262863	1.28255387573538	-0.79608602176123	0.425982038218878	NA
ENSMUSG00000014850.14	17.5767953960065	-0.415701498761225	0.714956702279075	-0.581435907148068	0.560946703055069	NA
ENSMUSG00000014856.11	15.578297499122	1.18492432464711	0.725688605002758	1.63282751923961	0.10250527754107	NA
ENSMUSG00000014859.8	53.8222015647173	-0.216751805930955	0.469567073417687	-0.461599243646608	0.644368737080417	0.850139730526834
ENSMUSG00000014867.8	102.113323944183	-0.360757782914432	0.362370311139862	-0.995550054251528	0.319468812549184	0.624577791645535
ENSMUSG00000014873.14	22.9130005174492	0.951969940464876	0.656274198058675	1.45056737455304	0.146900365582022	NA
ENSMUSG00000014905.3	38.7957699625783	0.72034527159908	0.496242299037626	1.45159989987968	0.146612886617887	0.423318792334702
ENSMUSG00000014907.9	32.5360480549478	1.07024779057202	0.691581899746106	1.54753586085022	0.121734084070422	0.38832163972464
ENSMUSG00000014956.14	221.186332947368	0.203160449670748	0.356204978584705	0.57034702456422	0.568442352440283	0.801519080178652
ENSMUSG00000014959.11	62.7716939039599	-0.231011657151258	0.404771479906685	-0.570721181256433	0.568188658460935	0.801519080178652
ENSMUSG00000014980.13	8.80329522467215	1.14386499678626	0.951669605734791	1.20195600436674	0.229380574222904	NA
ENSMUSG00000015002.15	125.711356089486	-0.156735453277565	0.348597067596168	-0.44961781910092	0.652986037304521	0.854065526628304
ENSMUSG00000015013.8	15.7921478078236	-0.314937432428935	0.722288038105813	-0.436027479085564	0.662816792519912	NA
ENSMUSG00000015016.7	8.28372671241431	-0.936345866786379	0.934310214167815	-1.00217877594368	0.316257256525355	NA
ENSMUSG00000015023.7	33.9951597140379	0.695728200078472	0.591952536956122	1.1753107836246	0.239870401815709	0.542320795881919
ENSMUSG00000015027.10	6.92043323564509	-0.0958884290861907	1.04693416704686	-0.0915897408875939	0.927024002773761	NA
ENSMUSG00000015087.13	30.940167175793	-0.447611101336013	0.574685820964191	-0.778879667824455	0.436050602034259	NA
ENSMUSG00000015092.8	75.2709202281217	0.374163849309296	0.408087088210363	0.916872550293529	0.359209429523675	0.657776018060081
ENSMUSG00000015095.11	22.696921544506	-2.21538399429157	0.649485611538154	-3.41098240659243	0.000647292680011319	NA
ENSMUSG00000015112.14	3.4800061213193	0.283582520403432	1.44777158551801	0.195875180339284	0.84470786416971	NA
ENSMUSG00000015120.14	223.777363147941	0.233804626344815	0.3013999607352	0.77572878833328	0.437909138198775	0.71660843097434
ENSMUSG00000015126.9	28.4906968418117	-0.0802002861322857	0.551244806718924	-0.145489418049392	0.884324470030685	NA
ENSMUSG00000015127.13	35.5106018610728	0.422144807559269	0.529865003048738	0.796702565993852	0.425623793339241	0.709219444961743
ENSMUSG00000015143.13	461.253082912513	-1.4388892980017	0.349604691232831	-4.11576084098776	3.85904294457504e-05	0.00124649785741203
ENSMUSG00000015149.12	33.3707784419029	-0.578605380547486	0.524204760834348	-1.10377742397179	0.269689700361539	0.578707370547066
ENSMUSG00000015165.15	439.357337645531	0.16608125510493	0.274772081928968	0.604432786398815	0.545555943337334	0.786738339767451
ENSMUSG00000015176.9	161.377322542912	0.933633697497329	0.385029990178209	2.42483370468155	0.0153154004381798	0.117706879573965
ENSMUSG00000015189.11	18.5287260339524	-0.283457065631435	0.677129553873524	-0.418615705089103	0.675497009924034	NA
ENSMUSG00000015202.12	8.89055964119611	0.572219728978923	0.92799292809846	0.616620786271995	0.537484880811642	NA
ENSMUSG00000015214.13	28.9333724702302	0.20240508609365	0.569670237068249	0.35530219576734	0.722363210659148	NA
ENSMUSG00000015217.10	15.3390184030794	-0.911721420214284	0.742585377700913	-1.22776645971272	0.219534649802681	NA
ENSMUSG00000015243.4	63.7885355527034	0.409996517413404	0.465478725708852	0.880806135208526	0.378422758494686	0.675188092161944
ENSMUSG00000015247.9	57.4214614061802	0.359326687015509	0.460927429546424	0.779573234270534	0.435642115579077	0.715332716622736
ENSMUSG00000015289.4	6.70072027727576	0.41366759838778	1.27143580639284	0.325354686652555	0.744912646243584	NA
ENSMUSG00000015290.14	30.8082945651168	0.600565715145084	0.572580283289112	1.04887599638467	0.294235194428263	NA
ENSMUSG00000015291.9	66.6930561796169	0.032630026581704	0.420668806384939	0.0775670220526061	0.938172475906489	0.982411849061907
ENSMUSG00000015312.8	187.513582022527	0.671552469110869	0.367220153576928	1.82874622367421	0.0674376343726133	0.275718932702076
ENSMUSG00000015314.9	36.9721383849455	-0.244518437674936	0.607930521589069	-0.402214445551754	0.687526211914876	0.871311179712963
ENSMUSG00000015316.11	179.838333437726	1.2956815552289	0.362173962634991	3.57751160741151	0.000346880819918198	0.00755774767548186
ENSMUSG00000015335.15	5.00633120248157	-0.119502226717309	1.23432171837368	-0.0968161095591536	0.922872430456857	NA
ENSMUSG00000015337.5	9.35518894109112	1.22763614888695	0.915288913139311	1.34125534709726	0.179837562077808	NA
ENSMUSG00000015340.9	4.70574461581496	3.08558835084547	1.37960064239561	2.23658083073048	0.0253137489405149	NA
ENSMUSG00000015341.15	28.1791889747807	0.801819159531409	0.580623846030947	1.38096146931015	0.167290808075071	NA
ENSMUSG00000015355.12	41.656588492843	0.742091547785618	0.522402652309833	1.42053556677865	0.155451821709527	0.437291086769978
ENSMUSG00000015357.9	50.1610947515192	0.75994263089697	0.462403716309312	1.64346133928696	0.100287517965035	0.348816299307602
ENSMUSG00000015363.12	25.8800662748774	-0.55267381993193	0.636646631606189	-0.868101380726063	0.385338835273138	NA
ENSMUSG00000015396.3	66.6221029958542	0.956682757525371	0.447708770726812	2.13684167047317	0.0326108715695291	0.186561016479987
ENSMUSG00000015437.4	5.79065609777523	2.19152442987224	1.27933929409823	1.71301267770172	0.0867102072854177	NA
ENSMUSG00000015461.14	59.5255869063379	-0.700132515680405	0.439308801337274	-1.59371383762213	0.111000143479686	0.369775910694217
ENSMUSG00000015474.15	6.86679620709599	-0.143637058852076	1.07015443228783	-0.13422086992155	0.893227923420778	NA
ENSMUSG00000015478.12	11.6223677435996	-1.2408991177893	1.02082730841937	-1.21558182030875	0.224144262937917	NA
ENSMUSG00000015488.13	5.29789113198977	1.64470128235716	1.18918963333479	1.3830437436164	0.166651453493365	NA
ENSMUSG00000015501.9	261.709847974317	-0.144301539835746	0.326111722769774	-0.442491115039182	0.658133858325861	0.858007420718926
ENSMUSG00000015522.17	58.9014186312288	0.324206607184451	0.424968359082507	0.76289587272898	0.445525497834605	0.721494937820691
ENSMUSG00000015536.13	8.62951276722686	-1.66332886741426	1.02103768531422	-1.62905727314304	0.103300895115762	NA
ENSMUSG00000015542.16	3.72676032202774	-1.61581278435885	1.53028419224841	-1.05589065909697	0.291018172177049	NA
ENSMUSG00000015568.14	1.78857096360314	-2.9701392876998	6.07802983077163	-0.48866809976198	0.625076691731569	NA
ENSMUSG00000015575.13	68.0576533219077	0.73899755940399	0.430449759052115	1.71680328276016	0.0860151209576974	0.318698789574827
ENSMUSG00000015597.15	28.6300243688774	-0.875711630772828	0.5921018585792	-1.47898814719848	0.139143482687228	NA
ENSMUSG00000015605.5	43.5830934030952	-0.417899547866175	0.520716887644681	-0.802546561830226	0.422236865751845	0.70451896378846
ENSMUSG00000015619.10	42.9036527718804	0.146593860072547	0.587744360711772	0.249417722860018	0.803037677395277	0.927506810282024
ENSMUSG00000015656.15	2434.09662382425	2.41931616986501	0.294421033127109	8.21719883314358	2.08311534245416e-16	3.84876390671831e-14
ENSMUSG00000015659.11	3.6047608146318	0.374397542588359	1.45293736477014	0.257683195206141	0.796651416511314	NA
ENSMUSG00000015668.12	10.9023613621395	-0.944917842427647	0.887144879021429	-1.06512235461467	0.286820564372995	NA
ENSMUSG00000015671.10	234.00581685608	1.05158983837504	0.310758670138149	3.38394368178867	0.000714526579094629	0.013638009375364
ENSMUSG00000015672.3	27.3559703795058	1.10934204447223	0.607570610637078	1.82586521640507	0.0678705667819387	NA
ENSMUSG00000015697.13	53.4370731274873	-0.343360607768925	0.463968417285136	-0.740051682349554	0.459268635187235	0.729434482162098
ENSMUSG00000015711.8	7.55409849370162	0.894081530875303	0.9777903575416	0.914389801432731	0.360512058795462	NA
ENSMUSG00000015714.10	65.4181486553952	-0.249454578501605	0.400988787909092	-0.622098637227131	0.53387701101916	0.781891233297586
ENSMUSG00000015733.12	183.998564348002	0.40377980825466	0.381604699301669	1.05811015690732	0.290005224371908	0.599507049695211
ENSMUSG00000015745.8	4.86808429197332	-0.556032603727472	1.29276933846379	-0.430109677870462	0.667115860406086	NA
ENSMUSG00000015747.5	15.0329608979273	-0.667102474244164	0.712698962787516	-0.936022793740271	0.349261452007875	NA
ENSMUSG00000015748.12	38.607772743276	0.720594453998538	0.538347962748113	1.33852917417967	0.180723996635273	0.469212828858448
ENSMUSG00000015749.11	98.4998537289566	-1.15567470268791	0.431122344136444	-2.68061889717818	0.00734861535557135	0.0746005589612836
ENSMUSG00000015750.14	42.9606904558989	-0.0125208871530438	0.470006225848942	-0.0266398325478095	0.978747002744375	0.996364142130459
ENSMUSG00000015755.15	66.819652430717	-0.217656477658697	0.441630004875025	-0.49284802947275	0.622119971019975	0.835517774826073
ENSMUSG00000015757.9	80.7616286398288	0.624107403744757	0.431191849851587	1.44740074275423	0.147784717856332	0.424707125321443
ENSMUSG00000015759.9	33.5067400536024	1.1651690635599	0.586386128059481	1.98703381237168	0.0469186499890041	0.22692905162221
ENSMUSG00000015776.11	13.5421540258422	0.996728169624425	0.779166593700042	1.27922343909952	0.20081838414066	NA
ENSMUSG00000015790.15	10.533773205959	-0.0251502934567023	0.881542213689502	-0.028529879869781	0.977239537034037	NA
ENSMUSG00000015804.13	55.120894358197	0.417141302954894	0.420920639753767	0.991021260442151	0.32167519897128	0.624577791645535
ENSMUSG00000015806.11	26.2488325316447	0.57576464086296	0.601118426742912	0.957822311291754	0.338152366589856	NA
ENSMUSG00000015837.14	580.511661294662	0.291516929469891	0.283440392675501	1.02849465708875	0.303717202825127	0.60782918537663
ENSMUSG00000015839.6	60.2558090612176	0.456008486389241	0.437644418039021	1.04196116206052	0.29742968565747	0.603496843349587
ENSMUSG00000015846.13	6.74665725644496	-1.36098117130604	1.05018696318461	-1.29594178847828	0.194995540756451	NA
ENSMUSG00000015850.10	4.11800213358325	1.49809458895594	1.52396907699445	0.98302164497357	0.32559678581371	NA
ENSMUSG00000015852.12	0.812627194928751	-0.46827764217511	3.47898743183918	-0.134601705625465	0.892926792987787	NA
ENSMUSG00000015869.15	49.5287288892751	-0.207683989873523	0.468763428193138	-0.44304648652743	0.657732110830781	0.857965389442837
ENSMUSG00000015880.12	4.21010934502311	1.24472707044206	1.33875620637241	0.929763809510068	0.352493388167658	NA
ENSMUSG00000015882.16	11.6537400219481	0.450326926559045	0.927024687525293	0.485776627762956	0.627125547100297	NA
ENSMUSG00000015889.7	96.4967533456286	0.338359603130186	0.374280553617201	0.904026671597388	0.365981258841554	0.663838303448536
ENSMUSG00000015932.8	8.69040384257853	0.686409472511497	0.927254411942768	0.740260131060842	0.459142167569973	NA
ENSMUSG00000015937.13	130.143664887985	-0.431352311075919	0.333322276404437	-1.29409985953815	0.195630930077015	0.489766539851345
ENSMUSG00000015942.8	10.49138176241	-1.29103620531238	0.916780289019871	-1.40822858080056	0.15906339576122	NA
ENSMUSG00000015943.10	6.89629750250652	0.575253820923975	1.12020925545774	0.513523538679311	0.607585149585197	NA
ENSMUSG00000015944.9	7.33761495597131	-1.56258857456967	1.134056718134	-1.37787515349389	0.168241837433158	NA
ENSMUSG00000015950.12	10.6753787062123	-1.16610743941925	0.867009182107951	-1.3449770354036	0.178632650757827	NA
ENSMUSG00000015961.8	211.556534970072	0.410132785301702	0.314078638639685	1.30582833356016	0.191610942398096	0.484112865210179
ENSMUSG00000015971.4	29.5264775114304	0.455356972052067	0.58143280200579	0.783163540965019	0.433531081761018	NA
ENSMUSG00000015994.9	53.3996999884877	0.126481795981088	0.471886609550499	0.268034297691917	0.788672918572304	0.924348505662345
ENSMUSG00000016018.3	121.776883960489	0.336196794837306	0.344464752053109	0.975997668363674	0.329065619786254	0.631734870238033
ENSMUSG00000016028.9	40.5525034989413	-0.456104225042372	0.605505927836963	-0.753261370490136	0.451292867097251	0.723870514142559
ENSMUSG00000016087.12	74.4161078423436	-0.0802850014864901	0.444310679094115	-0.180695637678976	0.856606483052237	0.951121477215933
ENSMUSG00000016181.8	48.653545229278	0.35894426205481	0.469643052003281	0.764291647717811	0.444693461604451	0.720715473386301
ENSMUSG00000016194.13	24.4135494658583	0.213783519405392	0.594080207959372	0.359856323340117	0.718954580796152	NA
ENSMUSG00000016206.6	47.7533779834128	-0.0426749980943995	0.491264748930681	-0.0868676170787518	0.930776740015981	0.980181394194509
ENSMUSG00000016239.10	6.17528804616147	0.898311471871606	1.27923694981811	0.70222445653976	0.482539195988976	NA
ENSMUSG00000016252.7	47.152620983183	0.97708773947752	0.458092449130586	2.13294879959697	0.0329289265430131	0.186879423648159
ENSMUSG00000016253.11	30.6042227863379	-0.663219663665144	0.519074604412199	-1.27769622714672	0.201356556045875	NA
ENSMUSG00000016256.10	36.519844986779	0.503586695977503	0.526772461725371	0.955985235689948	0.339079693779838	0.640569478317639
ENSMUSG00000016257.14	44.8082698177408	0.557923945422895	0.475886035185838	1.17238982481388	0.241040582813217	0.543901539821323
ENSMUSG00000016308.11	43.3238144254844	-0.00768140424712634	0.535719277541622	-0.0143384876541605	0.988559934074933	0.997527467498325
ENSMUSG00000016319.3	349.477621631479	0.638144105837615	0.283984859925938	2.24710608165534	0.0246332483511945	0.156932251079818
ENSMUSG00000016344.13	17.044990740072	-1.26045671427033	0.751228190966416	-1.67786130689375	0.0933741776924756	NA
ENSMUSG00000016409.4	23.7212778405788	0.299828866235194	0.608943967932945	0.492375131414735	0.622454176294576	NA
ENSMUSG00000016427.7	39.6123483062513	1.50773919610949	0.585081612431214	2.57697244978238	0.00996698943011903	0.090803795222327
ENSMUSG00000016477.16	3.27199808002081	-0.0724130811448403	1.55570292442326	-0.0465468567346724	0.962874388260807	NA
ENSMUSG00000016481.14	182.583124211095	0.972579413885246	0.343033265899071	2.83523351980506	0.00457922000196816	0.0549387459456907
ENSMUSG00000016487.14	13.8186277514595	-0.506738265529909	0.770787716817842	-0.65742908776745	0.510905053384668	NA
ENSMUSG00000016495.11	28.4585225809051	1.39199364338173	0.617392218863209	2.25463425169947	0.0241562956794464	NA
ENSMUSG00000016496.7	223.601346436294	0.922216291439066	0.393003112311179	2.34658775605028	0.0189462040396237	0.133962495353416
ENSMUSG00000016498.9	8.82163488165695	1.70223560473035	1.09436943980452	1.55544877517268	0.119839225389326	NA
ENSMUSG00000016503.15	25.4292379357079	0.17271932970313	0.605890802482402	0.285066762848157	0.775592993413393	NA
ENSMUSG00000016510.10	14.903341738365	0.64406203390844	0.805039170195321	0.800038131998193	0.423688704468243	NA
ENSMUSG00000016520.7	63.4338815545155	-0.254869566424568	0.423734883109226	-0.601483561028583	0.547517957709902	0.788828897898327
ENSMUSG00000016528.9	125.885212218371	0.290174589988103	0.329327657347411	0.881112118931435	0.378257138485656	0.675188092161944
ENSMUSG00000016529.5	4.70954488460849	4.07254587796521	1.49039514227777	2.7325276112623	0.00628504032055606	NA
ENSMUSG00000016534.14	82.322592176295	-0.359011436053164	0.442529482735911	-0.811271226119441	0.417209930273291	0.70098547208206
ENSMUSG00000016541.9	118.201328031707	-0.773491577210666	0.344854860942103	-2.24294816404089	0.0249001573631063	0.15755318747971
ENSMUSG00000016552.12	8.38264980558603	-0.0132306878292833	0.960294052566388	-0.0137777462996092	0.989007296730002	NA
ENSMUSG00000016554.8	277.342668125699	0.557073417831842	0.293408902912165	1.89862479394024	0.0576138260876426	0.251054964810209
ENSMUSG00000016559.13	671.861543322932	-0.120251889425107	0.28056564584642	-0.428605181016823	0.668210574464288	0.864266367523444
ENSMUSG00000016619.9	77.3202227814525	-0.0442573482253722	0.387990565654491	-0.114068104080612	0.909183806411101	0.971661268350966
ENSMUSG00000016637.6	3.11539170178325	-0.577772740295222	1.53996582029436	-0.375185431183649	0.707522564389628	NA
ENSMUSG00000016664.13	26.9101355975333	-0.00452079794325428	0.580464264652144	-0.00778824506270591	0.99378594232955	NA
ENSMUSG00000016756.15	62.7187651346849	-0.618810298332912	0.429914920229197	-1.43937851238801	0.150043308992154	0.427808669280717
ENSMUSG00000016757.9	29.546980104972	-0.421793552696628	0.608010197369072	-0.693727760688514	0.487852953133196	NA
ENSMUSG00000016831.11	210.453027249145	0.518373864267111	0.303036434080087	1.71059914244541	0.0871551374080008	0.32076228552889
ENSMUSG00000016833.13	30.2982911114409	0.533129341844414	0.576772847318566	0.924331553267371	0.355313719395315	NA
ENSMUSG00000016921.13	225.737513370125	0.832947038616696	0.302192220714379	2.75634838199215	0.00584507042214155	0.0641993859091191
ENSMUSG00000016933.16	217.881507484829	0.174558687775661	0.382386517575706	0.456498019026262	0.648031895022668	0.851567374995649
ENSMUSG00000016940.17	9.08293024118883	-0.509569080691334	0.905618132431042	-0.562675439507209	0.573655911507627	NA
ENSMUSG00000016946.5	15.5791264749808	1.39200767526868	0.754098709548954	1.84592236751244	0.0649034784070132	NA
ENSMUSG00000016984.7	20.9286320522169	0.0831825777649548	0.737746663680798	0.112752224930353	0.910226995696256	NA
ENSMUSG00000017002.13	1.61597650072315	0.987974450876366	2.25017625639041	0.439065361244728	0.660614177023987	NA
ENSMUSG00000017009.3	5.26391474753649	-0.285713900811764	1.27096097271265	-0.224801474589701	0.822133718881462	NA
ENSMUSG00000017119.18	116.596335874558	0.446480542791234	0.371007666970519	1.20342672817786	0.228811229908296	0.528968503977186
ENSMUSG00000017132.16	128.88960695201	0.252881653854132	0.338697335890656	0.746630182930556	0.455286823897879	0.726414452360726
ENSMUSG00000017146.11	12.0396702404292	0.416916167040704	0.859160426577154	0.485259974905588	0.627491943505492	NA
ENSMUSG00000017176.16	32.3888550992438	0.627485760736504	0.538736585952058	1.16473574859893	0.244125973810943	0.548185645616307
ENSMUSG00000017188.3	18.2510016010459	-0.0791977503381127	0.696206074294247	-0.113756189815489	0.909431068537284	NA
ENSMUSG00000017210.13	50.4547018505658	-0.877214437382038	0.446945558626886	-1.9626874469388	0.049682502629612	0.234406005767291
ENSMUSG00000017221.13	82.1858903323479	-0.000719025312629905	0.399630494259175	-0.00179922534180685	0.99856442665291	0.999646529412612
ENSMUSG00000017264.15	129.068507103435	0.00733971898087626	0.330948714875012	0.0221778138151956	0.982306115248586	0.997105475057845
ENSMUSG00000017286.14	32.6647110099313	-0.00198678704381055	0.557760058767559	-0.00356208196083564	0.997157875809484	0.999562367386686
ENSMUSG00000017288.14	37.1113980077411	-0.280951657732808	0.523216152014102	-0.536970536271279	0.591287966315078	0.816490019853318
ENSMUSG00000017291.12	86.5659277547517	-0.205549292000284	0.460513623549327	-0.446347906965377	0.655345955801232	0.855580262816814
ENSMUSG00000017299.12	32.3959500356718	-0.291190235570978	0.516595464207656	-0.563671684608381	0.572977591135605	0.803982312578294
ENSMUSG00000017307.14	14.2788332043777	0.0364697176892454	0.760057936084245	0.0479828128328405	0.961729940200735	NA
ENSMUSG00000017376.14	32.0507843515318	-1.69474368425963	0.578787787776671	-2.92809164265497	0.00341049505811923	0.0433969054365088
ENSMUSG00000017386.9	41.382749494364	0.12977223299511	0.548462045801974	0.236611145636074	0.812958472742399	0.931734928171844
ENSMUSG00000017404.11	1454.04445736865	1.50192989280184	0.238959133167466	6.285300222232	3.27220710101024e-10	2.25296664773596e-08
ENSMUSG00000017405.13	16.519322240709	-1.43953804487792	0.818770243319128	-1.75817093577109	0.0787184289239518	NA
ENSMUSG00000017418.12	39.3589511328406	0.438329777066085	0.541802543373751	0.809021261392848	0.418502916756292	0.7015403272323
ENSMUSG00000017421.17	197.067076338744	0.302028167455338	0.314534497033345	0.960238607542366	0.336935140212133	0.639027524257927
ENSMUSG00000017428.15	126.324839971834	-0.175481924243339	0.385953732994421	-0.454670882133625	0.649346031979351	0.852410832667626
ENSMUSG00000017466.8	17.5596135354606	0.315994037994974	0.721166097595987	0.438170955412828	0.661262361472663	NA
ENSMUSG00000017478.14	98.0025755694251	-0.105383943296919	0.352514767971038	-0.298949016812756	0.764978946231864	0.914450764142076
ENSMUSG00000017485.9	427.976670923711	-0.142659717662066	0.266955327845303	-0.534395469135326	0.593067953058297	0.817969804471864
ENSMUSG00000017493.11	24.1109298435525	1.18318377150485	0.742495944765739	1.59352220014905	0.111043092115289	NA
ENSMUSG00000017499.14	2.29242683482837	-1.00136840829038	1.78268207115496	-0.561720131981589	0.574306715657047	NA
ENSMUSG00000017548.14	107.402076306518	0.392380219992609	0.351209232027695	1.11722638305153	0.263897542688479	0.573870066185276
ENSMUSG00000017550.13	12.4817056970379	0.377263158880881	0.955798616961199	0.394709881544217	0.693057009286116	NA
ENSMUSG00000017561.15	298.604786430808	-0.151295847744919	0.296439123338292	-0.510377463140257	0.609787042708294	0.828661202394647
ENSMUSG00000017615.11	10.5512910143594	0.0348002432880932	0.842071249340696	0.0413269581586359	0.967035241921636	NA
ENSMUSG00000017631.17	37.0288419034829	0.201512930749408	0.504796076033493	0.399196705990317	0.689748270176317	0.872060658590987
ENSMUSG00000017639.12	19.7160721762322	-0.305671486841892	0.65904820696469	-0.463807478135312	0.642785685111167	NA
ENSMUSG00000017664.15	8.79561483168328	-1.89611497528851	0.954415320739888	-1.98667700956287	0.046958201137143	NA
ENSMUSG00000017670.15	36.888502059558	-0.383773786294538	0.493365282969372	-0.777869460098113	0.436645974026966	0.716163909656895
ENSMUSG00000017677.10	121.837194931777	1.4526926080981	0.385481019036867	3.76851916529556	0.000164218878535304	0.00421635704939239
ENSMUSG00000017679.15	29.6663830305293	0.301018981029377	0.555764512827593	0.541630446136021	0.588073113418058	NA
ENSMUSG00000017686.15	47.259959381428	0.250197609184582	0.464754951705869	0.538343073626734	0.590340219340951	0.815682639593412
ENSMUSG00000017697.3	10.0419775711888	0.544706154749636	0.873612781399796	0.623509827634218	0.532949546139538	NA
ENSMUSG00000017707.9	467.996596790044	-0.0142837533178915	0.336271672807804	-0.0424768259503541	0.966118585285893	0.992844050904075
ENSMUSG00000017715.10	37.5614290127916	0.00701975131036789	0.568919947039731	0.0123387329744613	0.990155365258748	0.998450762580816
ENSMUSG00000017716.14	2.24977201244438	-1.34225258603983	1.91198475202451	-0.7020205493891	0.482666348264529	NA
ENSMUSG00000017718.14	2.45458353468219	-2.06749630995236	1.73125091641666	-1.19422106313258	0.232391505881638	NA
ENSMUSG00000017721.14	70.6880576842681	-0.687637895752131	0.438102862904849	-1.56958092260054	0.116512639640176	0.379748345647403
ENSMUSG00000017756.8	146.850092794568	-0.595825357444552	0.329780979046146	-1.80673051298443	0.0708043076957056	0.282910983777218
ENSMUSG00000017760.14	78.8315115584255	-0.0707535800607493	0.394533953706789	-0.179334577914002	0.857674997682908	0.951257725281637
ENSMUSG00000017764.2	6.92033269418861	-1.0043761717065	1.06597256307664	-0.94221578162166	0.346082175665579	NA
ENSMUSG00000017765.15	29.2633040350535	-0.333912978015697	0.554655985679169	-0.602018163757533	0.547162046781684	NA
ENSMUSG00000017774.18	36.5359210816594	-0.339608985603915	0.552515107557805	-0.614660089757608	0.538779221892805	0.783324276337068
ENSMUSG00000017776.14	27.4206250723023	1.05680614935176	0.583587146732446	1.81087975509555	0.070159467038458	NA
ENSMUSG00000017778.13	94.3037263619373	1.03854942242892	0.438954426665481	2.36596183872269	0.0179832979538802	0.130069509735287
ENSMUSG00000017781.16	106.120519331852	-1.20168048896415	0.388201728910276	-3.09550524758711	0.00196477896232734	0.0292047158473145
ENSMUSG00000017801.14	30.6932718355044	0.436643125417476	0.5429602262429	0.804189891474919	0.421287315847508	NA
ENSMUSG00000017802.13	103.660643929293	-0.00193475914890458	0.360368440244391	-0.00536883625989135	0.995716309017903	0.999562367386686
ENSMUSG00000017830.14	5.59238575554537	-0.515081136293143	1.15342156767369	-0.446567977163804	0.655187021188344	NA
ENSMUSG00000017831.7	49.7940175915002	-0.0583285514082015	0.464200639193192	-0.125653750734984	0.900006013165648	0.967869152871459
ENSMUSG00000017837.11	11.8769528626447	-0.176959984951273	0.84549532000092	-0.20929741509519	0.834216069549803	NA
ENSMUSG00000017843.12	142.237202185593	-0.139387148415706	0.336801519518755	-0.413855461860361	0.678979963288106	0.867274876718674
ENSMUSG00000017858.11	21.6330038982618	-1.58636325344801	0.631662246723864	-2.51141058639444	0.0120249744325894	NA
ENSMUSG00000017897.17	2.86849317750348	-0.61685675143316	1.5896685242835	-0.388041118013072	0.697985605246134	NA
ENSMUSG00000017929.12	19.5141566737971	-0.416679566451801	0.653394518892941	-0.637715123716969	0.523659138842072	NA
ENSMUSG00000017999.15	126.643822932125	0.601424881887611	0.379087760907063	1.58650566942217	0.112624647088107	0.371585769261921
ENSMUSG00000018001.17	32.9513901995881	-0.119100405722316	0.544431389051592	-0.218761092981415	0.826836156060682	0.937446294758048
ENSMUSG00000018008.7	54.8191614684175	0.127269627831863	0.452651963928834	0.281164422058869	0.778584291452014	0.921739831123446
ENSMUSG00000018040.8	59.0192237264112	0.515840447618741	0.413587253686283	1.24723487733503	0.212311387954209	0.511848128709407
ENSMUSG00000018042.16	50.0831620833636	0.210422354119823	0.445857099496776	0.471950215343256	0.636962324197339	0.845245849629837
ENSMUSG00000018068.12	28.814908593629	0.546931091160973	0.600209692086344	0.911233354562848	0.362172433124505	NA
ENSMUSG00000018076.11	148.738040797777	-0.338957607695006	0.410134031398577	-0.826455699223847	0.408545638406755	0.696331225457685
ENSMUSG00000018143.9	37.9186158184986	1.04732548215109	0.535261211941353	1.95666238984984	0.0503871745154087	0.236042960534151
ENSMUSG00000018160.14	104.273437746008	0.155386613159075	0.354742609449276	0.43802635775924	0.661367176642617	0.86091042035832
ENSMUSG00000018166.8	14.7621730916653	-1.09780353830239	0.764593618835893	-1.43580002665182	0.151059252245696	NA
ENSMUSG00000018167.9	37.8759246930394	-0.507710466439719	0.512692266203503	-0.990283060439598	0.322035783926902	0.624992977293429
ENSMUSG00000018168.8	110.381618265959	-1.57219946273536	0.383025808648557	-4.10468283660207	4.04869956123358e-05	0.00129867661620402
ENSMUSG00000018169.11	22.9531845824752	-1.56531786253543	0.687295339041631	-2.27750396898969	0.022756147886837	NA
ENSMUSG00000018171.8	46.0148767709525	0.441572404717586	0.446988776019669	0.987882533985943	0.32321018033604	0.625924571809496
ENSMUSG00000018189.11	25.7084129516906	-0.156557383346621	0.59668589994667	-0.262378218356783	0.793029863833806	NA
ENSMUSG00000018196.17	13.7719628577328	0.702721141229764	0.822983923872575	0.85386982764267	0.393177119066173	NA
ENSMUSG00000018199.8	6.66120806281804	2.23395786826857	1.14085790418602	1.95813857279838	0.0502137546661628	NA
ENSMUSG00000018209.14	403.121741392919	-0.127836927525415	0.281220304088879	-0.454579294832893	0.649411933352972	0.852410832667626
ENSMUSG00000018239.8	6.9200326498329	-0.269322070125613	1.18153406929587	-0.227942703578674	0.819690783803916	NA
ENSMUSG00000018286.6	151.384335105619	0.80629270690612	0.333460165742503	2.41795809436722	0.0156078741729532	0.118964968324869
ENSMUSG00000018287.11	40.7124875520656	-0.124747566217862	0.505034412728062	-0.247008051479123	0.804901992935877	0.927506810282024
ENSMUSG00000018293.4	693.625022605325	-0.736631784536731	0.281574110216529	-2.61612043795598	0.00889351815974591	0.084874298305509
ENSMUSG00000018322.9	64.3972274387515	0.472111637575634	0.425630208654074	1.10920613240433	0.267341267723408	0.576762875111827
ENSMUSG00000018326.8	146.063902407523	-0.290321617768577	0.369197400585708	-0.786358780717309	0.431657324643423	0.713354269240776
ENSMUSG00000018334.15	17.0938703000971	0.347300992963227	0.724426373442146	0.479415169982023	0.631643303572955	NA
ENSMUSG00000018340.12	264.125910262312	0.389916907480636	0.291548857724394	1.33739816552199	0.181092702949051	0.469215027076556
ENSMUSG00000018341.11	17.1722054314705	-0.0534246939793036	0.677670759459138	-0.0788357668286335	0.937163254753187	NA
ENSMUSG00000018347.15	32.8400402464246	-0.422186050059759	0.525011035624256	-0.804147001515436	0.421312082620497	0.703812119213048
ENSMUSG00000018362.13	19.7266242102589	0.64666181909172	0.66933067563825	0.966132051956362	0.333978107894727	NA
ENSMUSG00000018363.15	52.3535133272665	-0.232078929065171	0.588324750208955	-0.39447418960828	0.693230979274578	0.874795860394285
ENSMUSG00000018372.12	18.5559333841593	-0.851680997483353	0.66388068885174	-1.28288262000275	0.199533202711744	NA
ENSMUSG00000018377.9	77.8626072526123	0.172291281060238	0.385856658224475	0.446516283671347	0.655224352805498	0.855580262816814
ENSMUSG00000018379.16	189.330901159315	0.190776914222528	0.309936393616976	0.615535697489895	0.538201002068879	0.783165998877241
ENSMUSG00000018381.14	3.15782905230416	-1.20748837387177	1.52166506815417	-0.793530980727902	0.427468526610007	NA
ENSMUSG00000018395.18	10.4788940550238	-1.03700948182296	0.922056247237889	-1.12467052300705	0.260728677109863	NA
ENSMUSG00000018398.17	2.54709591082069	-0.344562129054718	1.67658642719282	-0.205514087115469	0.837170493065345	NA
ENSMUSG00000018401.16	25.6961064603574	0.0109223595199741	0.577179969046158	0.0189236635117887	0.984902002167014	NA
ENSMUSG00000018405.7	17.0209549996288	0.317443961433288	0.716589938221779	0.442992490546303	0.657771166386335	NA
ENSMUSG00000018412.15	175.30127035561	-0.385036654364733	0.317033546580928	-1.21449814543978	0.224557557593896	0.524914655124597
ENSMUSG00000018415.13	13.4645391774697	0.0970254468666219	0.776455051558878	0.124959515263408	0.900555601189842	NA
ENSMUSG00000018425.17	165.157850102122	0.319343208767982	0.390556483611436	0.817662033965095	0.41355019500929	0.698799642053115
ENSMUSG00000018427.7	2.97601095192926	-2.62500380538532	1.75928949058373	-1.49208178610466	0.135677706095581	NA
ENSMUSG00000018428.14	4.87027284327019	1.03288113429343	1.33022440309129	0.776471347160028	0.437470732350265	NA
ENSMUSG00000018433.13	118.441127061266	0.85822574223114	0.340013581916259	2.52409253005226	0.0115997392134097	0.0994048152629676
ENSMUSG00000018442.12	29.5537439959727	1.02457021792251	0.555378475680854	1.84481441537046	0.0650645397320861	NA
ENSMUSG00000018446.8	169.99630291493	0.693551222232759	0.51873668402655	1.33700053146282	0.181222463357326	0.469215027076556
ENSMUSG00000018449.11	12.1478471306069	-0.157649281193039	0.809665618079721	-0.194709121485157	0.845620670671685	NA
ENSMUSG00000018474.16	204.684780292	-0.143108966325811	0.339818493908059	-0.421133543027621	0.673657569050852	0.86650635239373
ENSMUSG00000018476.7	504.358843766256	0.663086307515935	0.89969938941169	0.737008733494334	0.461117038332056	0.729700768318963
ENSMUSG00000018481.9	85.6856168419074	0.309285948910986	0.440716201939778	0.701780301131856	0.482816185459311	0.747387110566352
ENSMUSG00000018501.16	289.553406689013	-1.04318915767134	0.313386312412383	-3.32876426427524	0.000872322046282583	0.0159259111928034
ENSMUSG00000018507.15	31.5013518251133	-0.0964338651341204	0.559592530963005	-0.172328720985906	0.863179106022628	NA
ENSMUSG00000018509.7	1.37785018696191	-0.963389197770617	2.42191746342914	-0.397779533083913	0.690792705273494	NA
ENSMUSG00000018541.9	24.0183430953624	-0.422331372985808	0.596926860072812	-0.707509414024849	0.479249964529986	NA
ENSMUSG00000018547.8	26.9355633337987	-0.729865131981051	0.577013846602165	-1.26490055009767	0.205906980148195	NA
ENSMUSG00000018548.14	10.9388045280804	-1.84806934939791	0.929842336844578	-1.98750828626425	0.046866098566899	NA
ENSMUSG00000018559.15	22.9072989089408	-1.25373290214281	0.586808146030834	-2.13652947837048	0.032636280856906	NA
ENSMUSG00000018565.16	50.2967950497247	-0.102155645016371	0.462670726352132	-0.220795566258978	0.825251616004464	0.936799511999169
ENSMUSG00000018567.13	137.092327400615	-0.131143786731642	0.452385760034307	-0.289893710893323	0.771897553119327	0.91844276091143
ENSMUSG00000018572.9	46.7267003552078	-0.518619568261251	0.45845510242865	-1.13123305971268	0.257957010689086	0.566303912724758
ENSMUSG00000018574.13	61.7726694556341	-0.242188260038872	0.413273000198243	-0.586024879250995	0.557858795980751	0.795047756444026
ENSMUSG00000018583.5	457.057948071419	0.0175967371318305	0.275093608705842	0.0639663611765212	0.948997011824253	0.985702090761463
ENSMUSG00000018585.9	17.1678691752581	-0.101847138429537	0.76572595368961	-0.13300729580706	0.894187610549537	NA
ENSMUSG00000018599.5	14.0914676552792	-0.304223659754072	0.794620976786421	-0.382853799033098	0.701828169086729	NA
ENSMUSG00000018648.14	2.5885985486996	1.53338268215793	1.7150430268653	0.894078258176764	0.371280021182608	NA
ENSMUSG00000018651.13	4.73565751091441	1.2166914533015	1.30986183292264	0.928870070659852	0.352956425310922	NA
ENSMUSG00000018654.16	462.400604291148	0.539852925705074	0.257110407801628	2.09969300862217	0.0357558550014151	0.195640308392326
ENSMUSG00000018659.11	17.4129920557437	0.567125445553591	0.675673574434837	0.83934826965515	0.401273903674749	NA
ENSMUSG00000018661.16	57.2557842776589	-0.531147744269657	0.445357014565296	-1.19263361056096	0.233012896650783	0.534933682718672
ENSMUSG00000018666.12	22.861222428811	-0.462713793658341	0.62045876536543	-0.745760749122171	0.455811954502031	NA
ENSMUSG00000018669.13	30.8949002935438	-0.496814598823833	0.575567067713286	-0.863174122865759	0.3880417390107	NA
ENSMUSG00000018677.8	18.3614657091563	-0.808757044378998	0.679940167075332	-1.18945325418522	0.23426135547903	NA
ENSMUSG00000018678.11	68.9899862903611	-1.40822629944079	0.494206274880817	-2.84947069880971	0.00437920392702353	0.0532303761550571
ENSMUSG00000018697.13	49.6342050778469	0.569279727043315	0.46438176070785	1.22588735219827	0.220241068989149	0.521421577478668
ENSMUSG00000018707.12	680.580616431959	-0.203391806484366	0.290958228807015	-0.699041258665586	0.484526246818212	0.748503924432549
ENSMUSG00000018733.9	3.96913276646058	0.441494661363616	1.33480825750193	0.330755116985766	0.740829465840286	NA
ENSMUSG00000018736.13	37.9731093042058	0.672102480064873	0.524672159403042	1.28099512813787	0.20019537731715	0.496617855976324
ENSMUSG00000018750.13	60.0148972031627	-1.45177471346913	0.456038232807808	-3.18344956415302	0.00145531464495721	0.0234219454531615
ENSMUSG00000018761.13	39.0479276499531	0.623140923402	0.512611599067775	1.21562002212832	0.224129703360851	0.524689828638231
ENSMUSG00000018765.5	82.7713177690191	0.056489414347337	0.430527865489859	0.131209658829081	0.895609455376872	0.966772627806911
ENSMUSG00000018770.8	197.454621706276	0.435517515217047	0.324328350253993	1.3428290030026	0.17932734977267	0.467247665103369
ENSMUSG00000018774.12	6.19456743340079	-0.501287345488558	1.22932667119614	-0.407773911714455	0.683439668351827	NA
ENSMUSG00000018796.11	9.02070037041414	0.240088910907742	0.947953744076609	0.253270702719371	0.800059034032154	NA
ENSMUSG00000018800.13	5.71475671060189	-0.345039612814119	1.26999970616328	-0.271684797358337	0.785864391708917	NA
ENSMUSG00000018809.2	11.118715520843	-0.955123000421792	0.962309947874352	-0.992531566915176	0.320938288586706	NA
ENSMUSG00000018819.9	215.136242461826	-0.732344617538573	0.381714253725686	-1.91856764684733	0.0550390733562194	0.245145169458539
ENSMUSG00000018820.12	24.1792721517941	0.301689254354523	0.585197299671412	0.515534255752583	0.606179738367241	NA
ENSMUSG00000018821.3	2.3385326310594	0.169676391304986	1.65156813267337	0.10273653744477	0.918172074373269	NA
ENSMUSG00000018841.16	11.957058906036	-1.70340453848636	0.814638676738226	-2.09099394262338	0.0365286069786191	NA
ENSMUSG00000018846.8	52.1440256896656	1.40705411459909	0.466411286163468	3.01676686722787	0.00255486219884317	0.0351623153221388
ENSMUSG00000018848.4	123.757451908363	0.815028460080498	0.344759779062661	2.36404740221267	0.0180764995203389	0.130461486381946
ENSMUSG00000018858.14	27.1425842244645	0.527388212344341	0.563303825082907	0.936241134642961	0.349149048546168	NA
ENSMUSG00000018861.7	14.0396336071369	-1.77392427131786	0.79085109134692	-2.24305724646171	0.0248931231781224	NA
ENSMUSG00000018882.11	25.7611725854687	1.08283474514907	0.580669944708717	1.86480246655827	0.0622090974459658	NA
ENSMUSG00000018899.15	576.940928367436	0.144986713191894	0.269327444804699	0.538328774095156	0.590350089664598	0.815682639593412
ENSMUSG00000018900.7	8.42788386499674	-0.0196632102886952	1.13278648257036	-0.0173582670620136	0.986150802194747	NA
ENSMUSG00000018909.14	27.5231477786533	-0.111162068119027	0.599947046674729	-0.185286466089224	0.853004352734414	NA
ENSMUSG00000018914.5	0.930853487285639	-0.153471867160673	3.25239946791887	-0.0471872747104083	0.962363969535102	NA
ENSMUSG00000018916.5	3.63441423009624	2.04924417465797	2.01946423399089	1.01474645609753	0.310226703091442	NA
ENSMUSG00000018921.10	63.2968769901515	-0.00699627525786693	0.417184042193149	-0.0167702369944145	0.986619913995215	0.997105475057845
ENSMUSG00000018923.12	42.1799842123894	-0.0494925533364143	0.511638115939083	-0.0967335149484974	0.922938023549612	0.977539722718564
ENSMUSG00000018930.3	30.6855410033714	-1.76396506422683	1.47572708087817	-1.19531930197902	0.231962301207383	NA
ENSMUSG00000018931.3	4.70269637074228	-0.562638975371723	1.24851989791681	-0.450644780520121	0.652245586525555	NA
ENSMUSG00000018932.8	111.887630640099	-1.04392749439595	0.406931307786077	-2.56536539318017	0.0103067203364338	0.091662619881661
ENSMUSG00000018965.11	228.713143414124	-0.0566680079046938	0.305478255220689	-0.185505864775071	0.852832280675817	0.949060654724366
ENSMUSG00000018974.6	89.5757880514546	-0.201038633825751	0.402691124191638	-0.499237807213445	0.617611862981935	0.833406133541794
ENSMUSG00000018983.9	3.9090815447483	-1.92884854181005	1.62358611617	-1.18801739100859	0.234826558114344	NA
ENSMUSG00000018986.9	3.68076329660775	-0.495809549765111	1.58086827355891	-0.313631159570889	0.753801190857572	NA
ENSMUSG00000018995.11	13.2800069617546	0.088900295459166	0.817059673029822	0.108805144096154	0.913357043646766	NA
ENSMUSG00000018999.13	11.9650764315706	0.191924095491208	0.930993646458291	0.206149737134437	0.836673948434463	NA
ENSMUSG00000019039.12	11.0130673993829	0.0520023543821169	0.963855727036886	0.0539524255792763	0.956973067883934	NA
ENSMUSG00000019054.12	43.9958760195133	-0.287211378125277	0.464426169995697	-0.618422037087053	0.536297175023008	0.781991878996664
ENSMUSG00000019055.14	10.9607658801536	0.522604692996182	0.878802789702661	0.59467800867246	0.552058724513222	NA
ENSMUSG00000019080.7	2.71454113535815	-0.581267309283972	1.54008113918819	-0.377426418968011	0.705856736656458	NA
ENSMUSG00000019082.16	8.69356669049776	-0.521678828390296	0.970093336919181	-0.53776147978404	0.590741728702854	NA
ENSMUSG00000019087.12	142.415056625611	-0.203476566687795	0.372895320145293	-0.545666721182	0.585295051518224	0.812646018102784
ENSMUSG00000019088.12	2.49496857602668	0.0934433728396437	1.58748850856587	0.0588623932302099	0.953061711944251	NA
ENSMUSG00000019122.8	1.88619284714985	-1.44781763166334	2.44850548807834	-0.59130667205473	0.55431495990979	NA
ENSMUSG00000019132.9	61.9185230912305	-0.592236298534244	0.505314378456976	-1.1720155289123	0.24119082157247	0.543966074135195
ENSMUSG00000019139.9	83.2770543869853	0.198829984969151	0.398530801549462	0.498907447545115	0.617844587136264	0.833451410400297
ENSMUSG00000019143.14	29.8015987537864	0.490258178915671	0.56368522525482	0.869737500559899	0.384443873607728	NA
ENSMUSG00000019158.8	29.0193514197596	-0.487700517320707	0.58847936978748	-0.828747008577092	0.40724757949724	NA
ENSMUSG00000019173.10	96.3448938091127	-0.161353283056105	0.361390592152456	-0.446478924908029	0.655251332812304	0.855580262816814
ENSMUSG00000019179.9	180.503032851796	-0.0493545292012839	0.350433567463713	-0.140838474916917	0.887997547396351	0.963062061143215
ENSMUSG00000019188.15	154.904230484483	0.436012845334135	0.319629839232428	1.36411808854015	0.172530402626831	0.459910145428423
ENSMUSG00000019189.12	220.751977001927	-0.291808768903862	0.302739629529927	-0.963893525789678	0.335099310069142	0.637577543027295
ENSMUSG00000019210.9	67.5007399091849	0.594364162445886	0.412031795735464	1.44252013703206	0.149155694996014	0.42703298953109
ENSMUSG00000019214.12	3.60592383155954	-0.27495026618807	1.44355606466044	-0.190467327815734	0.848942943143879	NA
ENSMUSG00000019254.15	100.29859357633	-0.152114059261926	0.436459636011707	-0.348518045452995	0.727451164002643	0.896025847074188
ENSMUSG00000019256.16	9.27293842468202	1.72584408768874	0.93300475074163	1.84976988200424	0.0643467235006969	NA
ENSMUSG00000019261.2	72.7619902599899	-0.683363215832652	0.410997415933218	-1.66269467724267	0.0963735682269662	0.341875566060044
ENSMUSG00000019295.8	7.48050363181274	0.596902482426391	1.00917953960343	0.591473032302016	0.554203519136413	NA
ENSMUSG00000019297.8	57.1543755516958	0.342464353428349	0.431988491052586	0.792762678917436	0.427916104388693	0.711655540029202
ENSMUSG00000019302.15	2.89908452254493	-0.416690249158446	1.59250218178992	-0.261657568776515	0.793585456237773	NA
ENSMUSG00000019303.13	2.12222351388748	-0.797432854650681	2.0475537858807	-0.389456365029105	0.696938583323713	NA
ENSMUSG00000019312.9	11.1619088030391	0.209560124772649	1.02703985184835	0.204042836697629	0.838320024159845	NA
ENSMUSG00000019338.12	28.0702586662777	-0.360193541214688	0.591808942506785	-0.608631460837648	0.542768746312537	NA
ENSMUSG00000019362.7	37.4116799897931	0.595273797516706	0.50110477787056	1.18792281336114	0.23486382083307	0.536251106489348
ENSMUSG00000019370.10	48.3176651146341	-0.637037417519279	0.464236294668229	-1.37222665447678	0.169992890197064	0.456344567032464
ENSMUSG00000019373.10	62.0164385272994	0.153330146416373	0.413792788772019	0.370548135629427	0.710974117816781	0.886104560893012
ENSMUSG00000019428.15	106.536420631245	-0.16031952405394	0.369621610457023	-0.433739585344351	0.664477557384195	0.862383208080246
ENSMUSG00000019432.14	236.549548141698	-0.0777281182329454	0.293415366021185	-0.2649081378626	0.791080229131504	0.925319284281663
ENSMUSG00000019433.8	21.8728697669705	-0.427586555215832	0.611207415112949	-0.699576845180806	0.484191607094088	NA
ENSMUSG00000019437.16	4.15530503996284	2.55952687005987	1.6983810078679	1.50703926751573	0.131800592322215	NA
ENSMUSG00000019461.11	11.6039525708242	-1.38985400463027	0.89086064996595	-1.56012503715748	0.118730335966652	NA
ENSMUSG00000019470.11	166.843301417748	0.126158241051674	0.315736957562594	0.399567545166656	0.68947506472445	0.872060658590987
ENSMUSG00000019471.9	125.809210293451	-0.28166581697231	0.383028607751835	-0.735364960402127	0.462117255679987	0.730144849726016
ENSMUSG00000019478.14	1.67002508351981	-0.243562815198917	2.07628575530036	-0.117306981747164	0.906616792598015	NA
ENSMUSG00000019487.10	4.28869044060532	-0.382871294192696	1.30255366490702	-0.29393897887503	0.768804532234894	NA
ENSMUSG00000019494.13	68.0304841888712	-0.296709944037302	0.440579080842029	-0.673454453330455	0.500658215850147	0.759666335351741
ENSMUSG00000019505.7	676.029011618791	0.0623558363502929	0.364474183220129	0.171084370913131	0.864157424891292	0.953492420998535
ENSMUSG00000019518.9	9.59691850758973	-0.724132921670683	0.928192333858506	-0.780153956519394	0.435300260256676	NA
ENSMUSG00000019528.17	10.1033616450429	-0.560121750915322	0.966986502643896	-0.579244642385245	0.562424112223396	NA
ENSMUSG00000019564.11	5.20409618295679	-3.00927069834379	1.48062098805201	-2.03243822870765	0.0421093112844074	NA
ENSMUSG00000019578.10	90.1858030410087	0.0460280462899382	0.365016380930609	0.126098577199713	0.899653893712304	0.967869152871459
ENSMUSG00000019579.12	27.78674111313	1.45663537107643	0.636303414904785	2.28921507720401	0.0220668590041715	NA
ENSMUSG00000019659.7	24.2618378068754	-0.052765322016342	0.619089235072025	-0.0852305597111591	0.932078095831275	NA
ENSMUSG00000019689.4	9.98708819956589	-0.826099887240072	0.956824414162231	-0.863376681251787	0.387930396113004	NA
ENSMUSG00000019699.14	26.7112723487156	-0.300241411526674	0.623199314644068	-0.481774296716217	0.629966290391691	NA
ENSMUSG00000019710.12	54.4584122856907	0.159447727717751	0.425455799527363	0.374769195518972	0.707832125725528	0.885077582221498
ENSMUSG00000019715.13	32.9044209269431	-0.655194372815936	0.547029641271503	-1.19773102476315	0.231021747137208	0.532214189539532
ENSMUSG00000019726.10	126.762308253013	-0.0396775720411364	0.431046149381067	-0.0920494756724052	0.926658730516131	0.979081042151265
ENSMUSG00000019731.12	51.2190892249799	-0.208046827152221	0.475416274584309	-0.43760981328233	0.661669156267163	0.86091042035832
ENSMUSG00000019738.14	10.6680741371083	1.53958739736241	0.875066019114789	1.75939570698888	0.0785103205990459	NA
ENSMUSG00000019761.9	1.95242032719816	0.468935499084922	2.33384971241397	0.200927890339557	0.840754959081585	NA
ENSMUSG00000019763.10	8.55247354297695	-0.824802491630539	1.18634411395506	-0.695247257459554	0.486900361186066	NA
ENSMUSG00000019773.7	5.84188713566618	0.112880182885688	1.15834075403497	0.0974498932999476	0.92236912411503	NA
ENSMUSG00000019774.8	13.0129072092141	1.67255075848467	0.885099813456278	1.88967473843818	0.058801474644612	NA
ENSMUSG00000019777.15	87.7154976944412	0.49494005810816	0.376999176875501	1.31284121681679	0.189236458145387	0.480529521810633
ENSMUSG00000019782.9	48.4226269332916	0.0702692206522915	0.477544235337039	0.147147039902381	0.883015961477289	0.963009631396121
ENSMUSG00000019790.15	30.4667897278776	-0.475918901164335	0.57478840374598	-0.82798974033349	0.40767631024723	NA
ENSMUSG00000019791.10	10.3839167076969	-0.895316641462763	0.900843493136408	-0.99386480369148	0.320288691528804	NA
ENSMUSG00000019792.7	32.9613002830533	-0.0367254465615269	0.52726758609271	-0.0696523881425729	0.944470338447855	0.983553591643166
ENSMUSG00000019794.12	103.632620299672	1.21420522142597	0.350238401999294	3.46679637211346	0.000526700732474992	0.0104886927200094
ENSMUSG00000019795.16	67.1301660516494	0.191886318189261	0.442304483204713	0.43383308439234	0.664409654764926	0.862383208080246
ENSMUSG00000019797.9	6.03235360539859	-0.344670076323267	1.19141064291716	-0.28929578426406	0.772355038133229	NA
ENSMUSG00000019802.12	64.349064558515	0.481029708540003	0.435037319116488	1.10572056097836	0.268847487763888	0.578650741416435
ENSMUSG00000019804.11	63.4599344489272	-0.460147822289442	0.446585674441622	-1.03036852416902	0.302837043019637	0.607119922616191
ENSMUSG00000019806.12	19.0253323382756	-0.726866980145485	0.731108706323413	-0.994198227785771	0.320126370739802	NA
ENSMUSG00000019808.8	6.30216861362853	0.180738436052221	1.08146231471402	0.167124118513566	0.867272389062858	NA
ENSMUSG00000019809.15	23.9990632355468	0.823543253019616	0.657438969377197	1.25265354105762	0.21033182060227	NA
ENSMUSG00000019810.14	8.9835073248512	1.38358357720113	1.01756241133104	1.35970389805507	0.173923644098364	NA
ENSMUSG00000019813.14	4.18659953135112	-0.291578227615798	1.40433043470685	-0.207627934572724	0.835519491019065	NA
ENSMUSG00000019814.4	64.8045115163494	0.945969476185718	0.495707063357949	1.90832357678679	0.0563494075790244	0.24883165736856
ENSMUSG00000019817.17	37.066697140741	-0.762570424041137	0.587197148296694	-1.29866166116977	0.194060066778758	0.487418949674326
ENSMUSG00000019818.14	244.446809258439	0.523027656814438	0.374254572827451	1.39751841337041	0.162257733440163	0.446112184976258
ENSMUSG00000019820.9	625.654479687599	0.132109980488799	0.336907983041696	0.392124814900717	0.694965993156671	0.87562682007383
ENSMUSG00000019822.11	9.9569496680735	0.791473379745743	0.907986346196764	0.871679825430137	0.383383069233741	NA
ENSMUSG00000019823.16	132.881787338102	0.284059347215241	0.344191249072998	0.825295088065984	0.409204079823274	0.696430967097901
ENSMUSG00000019826.10	33.6741209153242	-0.68783077123733	0.565954735148787	-1.21534590757776	0.22423418959339	0.524689828638231
ENSMUSG00000019832.3	2.39131383129122	-0.751810269571056	1.74683504144428	-0.430384238771316	0.666916158553025	NA
ENSMUSG00000019837.7	18.5935663595147	-0.0748102607376652	0.68971646358456	-0.108465238525502	0.913626653435263	NA
ENSMUSG00000019838.10	11.9964170076113	0.825790632644599	0.811981694640963	1.01700646467128	0.309150354079428	NA
ENSMUSG00000019841.14	144.641341837765	-0.663669928897212	0.441122914119519	-1.50450114390883	0.132452379035079	0.403897057108949
ENSMUSG00000019842.6	32.4787909544046	-0.206437946462166	0.560056674741187	-0.368601885795871	0.712424489744559	0.886978091140193
ENSMUSG00000019843.13	172.844690656371	-0.52549900910331	0.341784189898401	-1.53751701990522	0.124166750426369	0.392020656335883
ENSMUSG00000019849.10	86.3583333655007	0.748149798256237	0.428755972708295	1.74493148988794	0.0809967951589554	0.308991856794884
ENSMUSG00000019850.10	616.504834600767	1.0601036901683	0.246286651921006	4.30434894420634	1.67477516599443e-05	0.000623853749332926
ENSMUSG00000019851.7	1.33198687196315	1.17236058977063	2.31214968873079	0.507043551498682	0.612124260854397	NA
ENSMUSG00000019854.15	96.2480128237201	-0.177966093553046	0.38445897327945	-0.462900090574004	0.643435982587929	0.849151658163898
ENSMUSG00000019857.6	33.7919441210631	0.00246407763507504	0.527672146689055	0.00466971328795012	0.996274121405396	0.999562367386686
ENSMUSG00000019861.13	18.4267902848062	-0.289202394951043	0.67669477354431	-0.427374949914707	0.669106249950132	NA
ENSMUSG00000019863.6	16.1099232144305	0.034670606289326	0.69608880078153	0.0498077346602902	0.960275602967754	NA
ENSMUSG00000019864.12	3.43572279740458	-2.03346385418099	1.53211548837239	-1.32722622388029	0.184433860125668	NA
ENSMUSG00000019866.12	197.291372752322	1.36975519195085	0.320017698777069	4.28024823997328	1.86684964575435e-05	0.000678974686121207
ENSMUSG00000019868.15	50.9080404155474	0.387089441239792	0.440026348806755	0.879696050678522	0.379023989414695	0.675540005039209
ENSMUSG00000019872.12	63.1228127791271	0.552551059848709	0.461955208338763	1.19611393025687	0.231652102223235	0.532382003550036
ENSMUSG00000019873.7	23.5269438381605	-0.472448978874245	0.591879778816336	-0.798217806695588	0.42474410575856	NA
ENSMUSG00000019877.9	209.434117921764	0.66234559379937	0.304690627923138	2.17382988874359	0.0297179129872906	0.175085510316703
ENSMUSG00000019878.7	18.4408241354406	0.562043479134049	0.65138736511605	0.862840621776439	0.388225101299411	NA
ENSMUSG00000019883.9	5.74239469933525	0.211890145299282	1.1853557059947	0.178756591146177	0.8581288314361	NA
ENSMUSG00000019897.8	34.0165678045227	1.13735647212775	0.537668605150277	2.11534849019101	0.0344002565008915	0.19143949973207
ENSMUSG00000019907.9	204.963986469488	0.269339064008254	0.301440963428397	0.893505185708552	0.371586696320265	0.66844955633696
ENSMUSG00000019916.13	48.6494008072448	1.01419594072481	0.486739375418584	2.08365296079165	0.0371917458757533	0.199522269686533
ENSMUSG00000019920.16	74.7020958702575	0.256552512006928	0.396501219932985	0.647040914654159	0.517605463754536	0.770274149465073
ENSMUSG00000019923.12	77.9426019145609	0.137857509778537	0.404707794163235	0.340634679555821	0.733378618648913	0.899727978629304
ENSMUSG00000019927.6	20.4731062986753	0.0672739940221322	0.756396413023036	0.0889401283029133	0.92912949212889	NA
ENSMUSG00000019942.11	7.75031010791192	-0.445720002804646	1.20578076972837	-0.369652605178845	0.71164134974327	NA
ENSMUSG00000019943.9	109.366384737291	0.550070830044813	0.377870774160688	1.45571149625585	0.145472390506757	0.422601869025604
ENSMUSG00000019947.9	114.692467291069	0.529630689269931	0.406027778293766	1.30441983919321	0.192090474505883	0.484588954971741
ENSMUSG00000019948.3	20.7482160381012	0.462293140360011	0.669426785016282	0.690580584325986	0.489829152307782	NA
ENSMUSG00000019951.9	105.679314670783	-0.621630615651975	0.377763693948835	-1.64555415358727	0.0998555847036852	0.348660264303503
ENSMUSG00000019952.13	7.56160967442583	-0.880104903489135	1.11663347275439	-0.788177074181905	0.430593137135567	NA
ENSMUSG00000019960.7	53.4009220157597	1.73324450124166	0.553072181928177	3.13384863291992	0.00172529830144537	0.0263879233588614
ENSMUSG00000019961.15	76.7673038228942	-0.200921987165263	0.381977588022618	-0.526004649134981	0.59888497675276	0.821351535007907
ENSMUSG00000019969.12	69.9900460343271	-0.121564864498884	0.392681977271283	-0.309575869367952	0.756883508838831	0.91066551897019
ENSMUSG00000019970.14	39.3316514627968	0.708783010664574	0.564762055306608	1.25501174167903	0.209474497560646	0.509511692592219
ENSMUSG00000019971.9	3.36659253587751	1.57056979692184	1.50526510921951	1.04338417684855	0.296770398954786	NA
ENSMUSG00000019977.14	63.3662500788318	0.47769529683922	0.497114283360688	0.960936575006078	0.336584059244594	0.638735320316671
ENSMUSG00000019978.14	160.425135415745	-0.632584510128247	0.329743926423548	-1.91841140787445	0.0550588656830609	0.245145169458539
ENSMUSG00000019979.11	50.3510177632172	-0.826500254274945	0.470914403638486	-1.75509656933203	0.0792427910476551	0.304839176212394
ENSMUSG00000019982.13	93.9544911184506	0.569341026329013	0.437893307204132	1.30018206938158	0.193538574608794	0.486638364789342
ENSMUSG00000019984.15	92.660272711586	0.418255299168311	0.355361213275585	1.17698635513142	0.239200952439641	0.542142861495963
ENSMUSG00000019986.15	29.8371350284876	-0.676602743008777	0.575270249231553	-1.17614763480744	0.239535885609247	NA
ENSMUSG00000019988.6	28.8478453640481	0.449688801334474	0.553177940861449	0.812918896646865	0.416264559519807	NA
ENSMUSG00000019996.15	12.8971701536133	0.418315926366918	0.787315368490933	0.531319396404918	0.595197466535243	NA
ENSMUSG00000019998.5	12.9898896750394	-0.791246588210333	0.81762347058373	-0.967739572893418	0.333174449185286	NA
ENSMUSG00000020003.14	21.4076560554998	0.802709992160689	0.703132124225372	1.1416204216882	0.253611831658295	NA
ENSMUSG00000020009.11	622.451210388901	0.0401569732041805	0.29197803258439	0.137534227656575	0.890608540035597	0.963860343551247
ENSMUSG00000020015.9	220.572068993422	0.0932732655756677	0.314792000177839	0.29630125772883	0.76700002552751	0.915681860406195
ENSMUSG00000020018.6	60.8391162582561	0.667307786656827	0.453304665365251	1.47209556318848	0.140995073460191	0.414911593713865
ENSMUSG00000020021.4	9.68137480581741	-0.274299759403941	1.04279870435778	-0.263041906609265	0.792518279277727	NA
ENSMUSG00000020022.15	45.4005919891274	0.71308504315373	0.477415289785334	1.4936367946539	0.135270576861616	0.408375682695296
ENSMUSG00000020023.16	2.85658469176409	1.06269890112812	1.56486784620175	0.679098176697482	0.497075657675308	NA
ENSMUSG00000020024.6	20.5154602583494	-0.922295537288808	0.808186091637381	-1.14119204330805	0.253790014714355	NA
ENSMUSG00000020029.5	14.222721266159	-0.806438064658689	0.750342939945293	-1.07475931567702	0.282482499665904	NA
ENSMUSG00000020034.7	166.532833572698	0.404977109733764	0.444681826403676	0.910712077012411	0.362447099073196	0.65963087100831
ENSMUSG00000020038.9	49.5937659945824	-0.52082405087383	0.457397303683808	-1.13866882615877	0.254841309740683	0.563750962496271
ENSMUSG00000020042.14	34.6306298993679	-0.756697296523349	0.535727513191165	-1.41246674455067	0.157812575906081	0.438584073033804
ENSMUSG00000020048.12	370.124860719215	0.422799618061744	0.292047895022514	1.44770643879885	0.147699168434457	0.424707125321443
ENSMUSG00000020056.15	19.8250660286908	-0.176344970351255	0.657277570176477	-0.268296041661527	0.788471452865703	NA
ENSMUSG00000020057.2	1.41282112672523	-0.70585884480305	2.63305582858862	-0.268075912838281	0.788640886230498	NA
ENSMUSG00000020063.15	67.1859174086714	0.647515337207342	0.40977334550477	1.58017924862759	0.114065822631476	0.374463421986344
ENSMUSG00000020064.8	91.4970705575991	-0.218762744926838	0.371442609218666	-0.588954361986118	0.555891888991787	0.793468675912566
ENSMUSG00000020069.15	8.37028565900188	-1.27704563722801	0.952449375789914	-1.34080158976312	0.179984879932095	NA
ENSMUSG00000020070.17	15.1627648240456	0.352512863687199	0.8092601635281	0.435598932919622	0.663127745134721	NA
ENSMUSG00000020074.6	97.5012941792004	0.11943152006246	0.378307828120127	0.315699309358558	0.752230750964022	0.908142665630637
ENSMUSG00000020075.7	363.969681282561	0.816135959146691	0.311192163589884	2.62261089653359	0.00872588648640899	0.0846322271382985
ENSMUSG00000020076.6	91.3629975660466	0.297214925518342	0.417907351532504	0.711198126638425	0.476961469311108	0.742279321680596
ENSMUSG00000020077.13	1434.48608636633	0.457553235460172	0.287170026889779	1.59331821783681	0.111088821814227	0.369775910694217
ENSMUSG00000020078.14	48.0909064817894	0.12003625310797	0.471489664901989	0.254589362277798	0.799040276189886	0.92586077449084
ENSMUSG00000020079.14	49.8826988515297	0.861410030526159	0.466865723407716	1.84509161272027	0.0650242130817225	0.27058273894097
ENSMUSG00000020087.4	23.1148267672037	0.388564515797878	0.656398825183774	0.591964063447387	0.553874653002819	NA
ENSMUSG00000020088.9	117.041835094706	0.735022979882475	0.344350539594554	2.13451961117269	0.0328002700670888	0.186581831822516
ENSMUSG00000020089.8	71.7747855043065	1.83423177503405	0.431277312558662	4.25302171392231	2.10905117017215e-05	0.000749362104232703
ENSMUSG00000020091.13	37.7534240466486	-1.20877858860673	0.596664940077439	-2.02589176506641	0.0427758773131728	0.216984147451232
ENSMUSG00000020097.13	127.75759736534	0.395954991057134	0.330412181863825	1.19836680604083	0.230774249099379	0.532214189539532
ENSMUSG00000020100.14	27.6928628374987	0.193992408517289	0.663475143001449	0.292388359328279	0.769989707475464	NA
ENSMUSG00000020101.13	615.884631841273	-0.00777770197312593	0.271754847438665	-0.0286202879044554	0.977167431303474	0.996364142130459
ENSMUSG00000020107.9	15.9462554844875	-0.146034248868248	0.724068392315549	-0.201685711485396	0.840162433639218	NA
ENSMUSG00000020108.3	48.2823390432969	1.40051941032212	0.504967052911502	2.77348671016674	0.00554591055717098	0.0627415568271607
ENSMUSG00000020109.12	46.4199355104842	0.0585651007039298	0.467482784587338	0.125277555954552	0.90030381994024	0.967869152871459
ENSMUSG00000020111.14	44.6793492284157	0.0412174593783869	0.465531627698625	0.0885384728469409	0.929448707479524	0.97949818217938
ENSMUSG00000020114.11	235.524140296705	0.581886968491519	0.308079717405713	1.88875455155402	0.0589247252266	0.254034493381531
ENSMUSG00000020115.2	108.601989016893	0.186760097003037	0.345611872633939	0.540375235317357	0.588938282868786	0.815350255736452
ENSMUSG00000020116.7	55.5103268346376	0.624205610038141	0.456903391870858	1.3661654107715	0.171887051410972	0.45972570380271
ENSMUSG00000020120.14	8.74109478734515	1.96478205338297	0.977591371559888	2.00981934839286	0.0444503122175603	NA
ENSMUSG00000020124.9	134.276792932031	0.294035713215584	0.356168220008327	0.825552917687909	0.409057752618773	0.696430967097901
ENSMUSG00000020128.14	81.2098591763486	0.662977708929568	0.626090389276752	1.05891692363371	0.289637616149914	0.599507049695211
ENSMUSG00000020130.8	149.296968263901	0.814439075540895	0.341049327947218	2.38803893983025	0.0169385469573613	0.125182637433683
ENSMUSG00000020131.13	1.29071018104935	0.143514101069869	2.68619018683323	0.053426634410819	0.957391984322255	NA
ENSMUSG00000020132.9	51.0249423606507	-0.62456817396237	0.47262611836426	-1.32148467825683	0.186339807985356	0.476052861219225
ENSMUSG00000020133.8	12.7931433962656	-0.892524276920487	0.793469209256782	-1.12483794772136	0.260657710719766	NA
ENSMUSG00000020134.12	182.882997050417	-0.050795550294104	0.327089441460351	-0.1552955976424	0.876588286085167	0.959691463962962
ENSMUSG00000020137.4	3.88828359413983	1.19154800732022	1.42304414995313	0.837323288500545	0.40241087222203	NA
ENSMUSG00000020142.11	39.8194644572027	0.703610218396494	0.653943865711143	1.07594895416802	0.2819500863221	0.592018525717184
ENSMUSG00000020143.14	679.792832273425	0.130620544378377	0.278977803408939	0.468211243985269	0.639633532139774	0.846519647464589
ENSMUSG00000020149.16	64.8787262756623	-0.330394345338364	0.459831381726677	-0.718511955616701	0.47244167887424	0.740484599497834
ENSMUSG00000020152.7	477.405207946338	-0.524220407662556	0.353150252005116	-1.48441181815994	0.137699701381633	0.411806260091057
ENSMUSG00000020153.13	35.1484386692031	0.0620185066552628	0.507876879383257	0.122113270307905	0.90280931234751	0.968279730256642
ENSMUSG00000020156.15	32.3111264913047	-0.768262342226086	0.569129975998	-1.34988908443787	0.177051563552336	0.465224307918515
ENSMUSG00000020163.11	25.6505696477351	-0.646947891557115	0.659223238557038	-0.98137907421651	0.326405841459814	NA
ENSMUSG00000020166.13	154.796608526858	0.702475358963908	0.333110394002369	2.10883650469013	0.0349586964465407	0.193150979529392
ENSMUSG00000020167.13	45.8677673974093	-1.19205175376626	0.507746496161759	-2.34773014245772	0.0188882003850016	0.133962495353416
ENSMUSG00000020170.3	20.5758064187394	-0.430906454064715	0.687451989103857	-0.626816797237626	0.530779331600605	NA
ENSMUSG00000020171.7	23.4196243952641	0.625215720170416	0.669237430305696	0.934221087850434	0.350189860034444	NA
ENSMUSG00000020176.16	1.6227098640465	-2.22812330287549	2.48076479074196	-0.898159838123587	0.369100341368553	NA
ENSMUSG00000020178.5	30.9507632854753	-0.42095769170457	0.632791475720412	-0.665239194673607	0.505897515038248	NA
ENSMUSG00000020180.9	66.1396191801544	-0.410591198865326	0.515957142203586	-0.795785473792929	0.426156736286894	0.709552910375567
ENSMUSG00000020183.10	17.6045631812478	0.414475822242687	0.712462999356646	0.5817506630056	0.560734640658912	NA
ENSMUSG00000020184.13	47.1933292560048	0.697188569067375	0.466326233958209	1.49506615390172	0.13489717801868	0.40765890555242
ENSMUSG00000020186.6	2.04043430358985	0.783939373534836	2.05972117295828	0.380604609899165	0.703496660112973	NA
ENSMUSG00000020189.12	201.856811915543	0.0585864796371356	0.320310409517544	0.182905325260517	0.854872304433302	0.950109522179361
ENSMUSG00000020190.12	321.706121656341	-0.0941192874977806	0.309426723620692	-0.3041731056596	0.760996013257724	0.912587105185667
ENSMUSG00000020196.9	105.241238650572	-1.61111532779813	0.413029011968467	-3.90073162202255	9.59024209358261e-05	0.00271762749878884
ENSMUSG00000020198.7	116.485202156861	-0.485289175868001	0.360574667769263	-1.34587706582467	0.178342166244525	0.466456662448165
ENSMUSG00000020205.8	40.8208062099415	0.467067820564494	0.542904729053734	0.860312676551149	0.389616706952229	0.679622193886838
ENSMUSG00000020211.14	125.17056837944	-0.700033286590388	0.485654118899367	-1.44142355505368	0.149465059630413	0.42703298953109
ENSMUSG00000020212.12	2.32856861448949	0.917749017641191	1.72607967723633	0.531695627811702	0.594936820598262	NA
ENSMUSG00000020219.6	28.9472337942302	0.0459579971064317	0.609989952494178	0.0753422198488923	0.939942430339598	NA
ENSMUSG00000020220.15	287.852208672939	-0.508329782815233	0.360447804805944	-1.41027293282839	0.1584591076239	0.438938971429115
ENSMUSG00000020224.13	34.7787736235318	0.584720916029301	0.543619175360826	1.07560759909029	0.282102787422282	0.592018525717184
ENSMUSG00000020225.9	12.4910365725605	0.52756610681368	0.836738453757495	0.630503001797716	0.528365539432612	NA
ENSMUSG00000020227.9	10.0242907438908	0.163363261388062	0.929587732699891	0.175737324882279	0.860500310600078	NA
ENSMUSG00000020228.10	49.9940353791806	0.45012000827764	0.459533034024231	0.979516106461031	0.327325034326045	0.630868013432067
ENSMUSG00000020230.13	12.7133700675737	-2.09078079449193	0.790076128795425	-2.64630295523496	0.00813768995990592	NA
ENSMUSG00000020231.14	12.0958497429608	-1.62495444369335	0.866968211041467	-1.87429530056394	0.0608897348990655	NA
ENSMUSG00000020232.16	13.8134955509803	-1.23169811460437	0.746437532517803	-1.6501020660761	0.0989220622659046	NA
ENSMUSG00000020235.15	53.1212341749641	-0.63463775293276	0.435586464994882	-1.45697307867502	0.14512381168019	0.422120205384634
ENSMUSG00000020238.13	59.9481827605338	0.181365040864105	0.469308801750655	0.386451394449798	0.699162393451831	0.877426018099135
ENSMUSG00000020246.12	24.5594285104759	1.29097784507979	0.622583088660762	2.07358321899942	0.0381180350223298	NA
ENSMUSG00000020248.17	25.9094535649208	1.25096915103502	0.582849732236762	2.14629789094054	0.0318492197656715	NA
ENSMUSG00000020250.9	61.2268465503634	0.274542021031855	0.443173549664532	0.619490990018865	0.535592955651345	0.781891233297586
ENSMUSG00000020253.13	7.66659053126447	-0.120820485011656	1.03646629509839	-0.116569622748984	0.907201111104966	NA
ENSMUSG00000020255.7	18.7925397896837	0.442779979482656	0.702100856186578	0.630650106150833	0.528269329031482	NA
ENSMUSG00000020257.11	109.604245727257	-0.0717270917088833	0.38180511330577	-0.187863098762222	0.850983970564392	0.949060654724366
ENSMUSG00000020258.14	5.60137017481755	-0.591278015853007	1.13661194565507	-0.520210981516855	0.602916532203329	NA
ENSMUSG00000020260.8	27.2065978314072	0.102755877424017	0.578843178030787	0.177519371954232	0.859100450257467	NA
ENSMUSG00000020261.14	4.7967901469762	0.72873323455201	1.33177847217561	0.547188026970838	0.584249560990484	NA
ENSMUSG00000020262.14	5.03916607567932	-0.619891978858473	1.46753210639856	-0.42240437272595	0.672729886739721	NA
ENSMUSG00000020263.13	9.89257165520859	-1.09100091344848	0.972168315903813	-1.12223459209755	0.261762708232409	NA
[truncated: 8,246 more rows]

## Sheet: GeneOntology_Transcripts_up
Category	Term	Count	%	PValue	Genes	List Total	Pop Hits	Pop Total	Fold Enrichment	Bonferroni	Benjamini	FDR
[truncated: 417 more rows]

[truncated: 4 more sheets: GeneOntology_Transcripts_down, GeneOntology_RibosomeDensity_up, GeneOntology_RibosomeDensity_do, README]
