# Supplementary material for: Translation-dependent and -independent mRNA decay occur through mutually exclusive pathways defined by ribosome density during T cell activation
Source: HighWire-hosted journal article supplement (doi:10.1101/gr.277863.123), 2024-03-20
Supplement: Supplemental_table_S3.xlsx [file Supplemental_table_S3.xlsx]

## Sheet: Supplemental_table_S3
gene_id	transcript_id	gene_name	Total_Degradation_Lympho_Resting	TIDindex_Lympho_Resting	TDDindex_Lympho_Resting	Total_Degradation_Lympho_Activated	TIDindex_Lympho_Activated	TDDindex_Lympho_Activated	delta_TDDindex	delta_TIDindex	UTR5_Length	UTR5_GC_percent	CDS_Length	CDS_GC_percent	UTR3_Length	UTR3_GC_percent	Transcript_length	Total_m6ASeq_Score	CDS_DG_MFEden	47UTR5_30CDS_DG_MFEden	N_Exon	N_AUUUA_UTR5	N_AUUUA_CDS	N_AUUUA_UTR3	n4G_UTR5	n4G_CDS	n4G_UTR3	Sum_Kozak_uOFR	GC3_Percent	ALA_A_Percent	ARG_R_Percent	ASN_N_Percent	ASP_D_Percent	CYS_C_Percent	GLU_E_Percent	GLN_Q_Percent	GLY_G_Percent	HIS_H_Percent	ILE_I_Percent	LEU_L_Percent	LYS_K_Percent	MET_M_Percent	PHE_F_Percent	PRO_P_Percent	SER_S_Percent	THR_T_Percent	TRP_W_Percent	TYR_Y_Percent	VAL_V_Percent
ENSMUSG00000000001	ENSMUST00000000001	Gnai3	0.808193	0.370901	0.437292	0.443968	0.0205942	0.423374	-0.0139187	-0.350307	141	70	1065	42	2056	37	38867	1.554	2.303	-18.777	9	0	0	4	0	0	0	0	28.3286	6.78	5.65	3.95	7.06	2.82	8.47	3.67	5.37	1.41	7.06	7.63	7.91	2.54	4.8	0.85	6.21	6.5	0.85	4.24	6.21
ENSMUSG00000000028	ENSMUST00000096990	Cdc45	0.838888	0.495104	0.343783	0.786462	0.482709	0.303752	-0.0400311	-0.0123952	61	63	1563	50	123	30	31174	0	-2.457	-1.096	18	0	0	1	0	0	0	0	35.8382	5.77	5.58	2.69	7.31	1.73	7.69	5	3.65	2.88	3.08	12.12	6.35	3.27	5.19	2.31	8.85	5.19	1.54	3.27	6.54
ENSMUSG00000000037	ENSMUST00000019101	Scml2	0.644917	0.109935	0.534981	0.207312	0.569146	-0.361834	-0.896815	0.45921	501	59	2718	45	1623	28	95425	0	4.274	0.643	26	0	3	3	0	0	0	0	21.2389	7.4	6.63	2.65	6.52	1.55	5.86	4.2	8.07	0.88	2.54	5.86	10.5	0.99	4.31	8.84	7.18	8.51	1.77	0.66	5.08
ENSMUSG00000000056	ENSMUST00000103015	Narf	0.695436	0.673594	0.0218422	0.642831	0.635437	0.00739322	-0.014449	-0.0381564	72	63	1389	51	2934	47	18604	1.324	-4.253	2.093	11	0	0	5	0	0	0	0	34.0564	6.93	5.19	2.38	5.63	3.46	8.23	5.63	6.06	3.9	3.25	9.52	6.71	1.52	3.9	3.9	7.79	4.76	0.65	2.81	7.79
ENSMUSG00000000058	ENSMUST00000000058	Cav2	1	0.26812	0.73188						176	75	489	51	2068	30	7931	0	-3.438	-8.197	3	0	0	3	0	0	0	0	34.1615	6.17	1.23	0.62	7.41	2.47	4.32	2.47	3.7	5.56	6.17	11.11	4.94	3.7	6.17	4.32	10.49	5.56	1.85	3.09	8.64
ENSMUSG00000000078	ENSMUST00000222857	Klf6	0.964909	0.905464	0.0594446	0.898535	0.795534	0.103001	0.0435564	-0.10993	98	65	261	52	756	50	5735	3.179	-4.65	-10.661	5	0	0	1	0	0	0	0	25.8824	4.65	3.49	0	6.98	4.65	8.14	5.81	4.65	1.16	3.49	11.63	1.16	3.49	4.65	10.47	10.47	3.49	4.65	2.33	4.65
ENSMUSG00000000085	ENSMUST00000106301	Scmh1	0.358682	0.583149	-0.224467	0.617911	0.655162	-0.0372504	0.187217	0.0720123	169	44	2121	51	294	52	83038	0.785	-1.056	-4.139	17	0	0	0	0	0	0	0	34.6099	4.82	5.95	3.4	5.1	2.27	4.39	3.26	6.66	3.4	3.26	10.34	7.08	2.27	4.39	8.78	9.63	6.23	1.7	1.56	5.52
ENSMUSG00000000088	ENSMUST00000000090	Cox5a	0.81186	0.641966	0.169894	0.707729	0.62331	0.0844194	-0.0854743	-0.0186561	49	66	441	51	155	34	11148	0	-0.019	-2.11	5	0	0	0	0	0	0	0	29.6552	14.38	7.53	2.74	6.16	2.74	7.53	0.68	4.79	2.74	5.48	10.27	4.79	1.37	2.05	6.85	4.79	4.11	1.37	3.42	6.16
ENSMUSG00000000093	ENSMUST00000000095	Tbx2	-19.1924	-9.22385	-9.96851	-5.45868	-2.67384	-2.78483	7.18368	6.55001	556	69	2136	66	934	49	9398	0	-14.178	-39.501	7	0	0	5	0	0	0	5.41	54.0845	14.91	6.61	1.41	4.08	0.56	6.05	2.53	9	2.95	2.11	9.14	4.92	2.39	4.22	11.25	9.14	3.8	0.42	1.83	2.67
ENSMUSG00000000125	ENSMUST00000000127	Wnt3	0.936261	0.656026	0.280234	0.865219	0.517019	0.3482	0.0679659	-0.139008	119	56	1068	60	1889	47	43808	0	-10.168	1.223	5	0	0	4	0	0	0	2.11	44.6328	6.76	6.76	3.1	5.07	6.76	6.48	2.54	8.73	4.23	3.94	8.17	5.07	1.41	3.66	4.51	6.76	5.63	2.54	2.54	5.35
ENSMUSG00000000126	ENSMUST00000108783	Wnt9a									43	80	1098	62	2177	52	26623	0	-12.853	-17.907	4	0	0	4	0	0	0	0	47.2527	9.59	9.59	2.19	3.01	6.58	7.12	3.01	8.77	2.74	1.37	9.86	5.21	1.1	3.29	3.84	6.85	6.58	1.64	2.47	5.21
ENSMUSG00000000127	ENSMUST00000000129	Fer	0.197235	0.718653	-0.521418						55	47	2472	43	446	46	243442	0	3.783	0.209	18	0	2	0	0	0	0	0	29.4404	4.86	3.77	4.13	4.62	1.46	9.48	6.8	4.74	2.43	5.71	10.94	9.84	3.04	2.79	3.16	6.44	4.98	1.09	3.28	6.44
ENSMUSG00000000131	ENSMUST00000009344	Xpo6	0.40484	-0.0782732	0.483113	0.69105	0.302014	0.389036	-0.0940777	0.380287	507	71	3375	50	573	51	98693	0.987	-0.431	-3.704	24	0	3	0	0	0	0	0	31.2556	5.69	4.98	3.74	4.54	1.96	6.41	6.05	3.2	2.76	5.07	14.5	4.27	2.14	5.87	4.18	7.65	6.14	0.98	2.76	7.12
ENSMUSG00000000134	ENSMUST00000077680	Tfe3	0.789195	0.430631	0.358564	0.824542	0.589917	0.234624	-0.12394	0.159286	287	67	1719	58	1271	52	12545	0	-6.064	-28.777	10	0	0	0	0	0	0	5.74	40.9807	9.27	6.29	2.97	4.02	0.17	8.04	5.94	5.59	1.92	4.2	12.41	3.32	1.57	1.4	9.97	13.11	4.55	0.17	1.22	3.85
ENSMUSG00000000142	ENSMUST00000052915	Axin2	0.913999	0.855595	0.058404	0.847562	0.780799	0.0667633	0.00835932	-0.074796	349	57	2523	56	1388	48	30435	2.569	-5.151	7.02	11	0	2	3	0	0	0	5.44	43.9809	7.86	6.31	2.26	4.4	2.38	7.86	4.88	6.9	3.93	2.02	8.81	6.19	1.9	2.74	7.74	9.64	5.24	0.71	2.98	5.24
ENSMUSG00000000148	ENSMUST00000041588	Brat1	0.745348	0.391162	0.354186	0.869494	0.598195	0.271299	-0.0828869	0.207033	82	68	2469	60	782	47	14369	0	-12.091	-17.472	14	0	0	0	0	0	0	0	38.9769	10.58	4.87	0.97	5.23	3.16	5.35	6.33	6.08	2.68	1.58	17.4	2.07	1.46	3.41	7.18	8.15	4.38	1.95	0.61	6.57
ENSMUSG00000000149	ENSMUST00000000153	Gna12	0.342018	0.34126	0.000757221	0.376405	0.478403	-0.101998	-0.102755	0.137142	135	87	1140	59	2141	55	72024	0	-9.612	-36.458	4	0	1	1	0	0	0	2.93	52.1164	6.33	10.29	3.69	6.6	0.79	6.33	4.22	5.01	2.37	6.33	10.55	7.12	2.64	7.12	2.64	6.07	3.17	0.79	1.32	6.6
ENSMUSG00000000154	ENSMUST00000105917	Slc22a18									266	58	1233	55	53	49	24225	0	-5.803	-13.704	11	0	0	0	0	0	0	0	28.6064	9.51	3.41	0.73	1.71	1.95	1.71	3.9	9.27	0.98	4.63	18.78	2.2	3.9	6.59	5.12	8.78	6.34	0.24	1.95	8.29
ENSMUSG00000000167	ENSMUST00000000171	Pih1d2	-0.0453034	0.699959	-0.745263						305	59	948	43	3	0	7677	0	5.83	-0.661	6	0	1	0	0	0	0	2.17	23.8854	6.03	4.76	4.13	4.13	2.22	9.21	4.76	2.86	1.27	7.62	11.43	8.25	3.17	2.22	5.71	7.94	5.4	0.63	1.9	6.35
ENSMUSG00000000168	ENSMUST00000034567	Dlat	0.799203	0.305483	0.49372	0.704374	0.302027	0.402347	-0.0913733	-0.00345569	314	67	1929	51	1792	36	25148	2.03	-4.513	-24.994	14	0	1	6	0	0	0	0	28.8612	13.08	4.83	2.02	3.89	1.56	5.92	3.12	7.48	1.09	6.54	7.32	6.23	2.18	2.49	9.81	7.01	4.83	1.09	1.56	7.94
ENSMUSG00000000171	ENSMUST00000000175	Sdhd	0.886186	0.370969	0.515217	0.747955	0.188683	0.559272	0.0440549	-0.182286	23	60	480	57	728	43	7456	1.788	-6.816	13.252	4	0	0	4	0	0	0	0	31.6456	11.95	5.03	1.26	3.14	3.14	0.63	3.77	8.81	5.66	1.89	16.98	2.52	1.26	1.89	3.77	8.81	4.4	1.89	3.77	9.43
ENSMUSG00000000182	ENSMUST00000000186	Fgf23				-4.25646	-4.91003	0.653575			128	52	756	61	930	48	8507	0	-11.951	-4.574	3	0	0	1	0	0	2	0	45.6	6.77	10.36	2.79	4.38	2.79	3.59	2.39	9.16	4.38	2.39	10.76	1.59	1.59	3.98	8.76	7.17	7.17	0.8	3.19	5.98
ENSMUSG00000000184	ENSMUST00000201066	Ccnd2	0.649135	0.697386	-0.0482517	0.311863	0.711121	-0.399258	-0.351007	0.013735	194	60	471	56	318	40	2751	3.587	-5.66	-14.139	3	0	1	0	0	0	0	0	38.7097	4.49	5.77	2.56	3.85	5.13	8.97	4.49	1.28	1.28	3.21	16.67	5.13	4.49	3.21	9.62	2.56	5.77	0.64	3.21	7.69
ENSMUSG00000000194	ENSMUST00000056433	Gpr107	0.456719	0.258622	0.198097	0.393237	0.267067	0.12617	-0.0719264	0.00844456	43	55	1656	50	4435	52	66460	1.647	-1.856	-12.98	18	0	2	6	0	0	0	0	32.5455	6.35	3.45	3.45	5.26	1.09	5.08	2.54	5.81	2.72	7.08	11.8	6.9	1.63	6.53	3.81	8.71	4.54	1.63	3.63	7.99
ENSMUSG00000000202	ENSMUST00000000206	Btbd17									49	54	1437	65	231	53	4681	0	-16.325	-5.299	3	0	0	0	0	0	0	0	47.5891	14.02	8.58	2.3	3.97	0.84	4.18	4.81	7.11	4.39	2.3	13.81	1.46	1.05	3.56	5.44	6.69	3.35	2.09	2.93	7.11
ENSMUSG00000000204	ENSMUST00000000208	Slfn4	0.323835	0.317157	0.00667793	0.249726	0.60678	-0.357054	-0.363732	0.289623	1227	49	1809	44	922	32	15031	0	0.987	3.832	8	1	1	3	0	0	0	34.24	25.1248	5.65	3.65	3.32	4.32	3.16	6.98	4.32	6.81	2.66	5.48	10.3	8.47	1.83	4.32	3.49	6.98	5.81	1.66	3.82	6.98
ENSMUSG00000000216	ENSMUST00000000221	Scnn1g									97	54	1968	51	926	44	33997	0	-0.477	-0.516	13	0	0	0	0	0	0	0	33.3333	5.95	4.12	5.34	4.27	3.21	5.34	5.19	4.27	1.83	5.5	9.47	5.65	2.75	4.73	5.34	8.55	6.87	2.14	4.27	5.19
ENSMUSG00000000223	ENSMUST00000153424	Drp2									388	57	2874	52	3873	43	51946	0	-2.122	-7.762	23	0	1	5	0	0	0	7.06	35.6695	7.31	5.85	3.24	4.6	2.3	8.78	6.69	4.18	3.97	3.87	11.18	4.81	1.99	3.24	5.22	9.4	4.91	1.46	1.57	5.43
ENSMUSG00000000244	ENSMUST00000075172	Tspan32	0.0961119	-0.521751	0.617862	0.502109	-0.149839	0.651948	0.0340853	0.371911	281	56	690	54	905	47	14007	3.975	-7.949	-15.588	8	0	0	1	0	0	0	0	35.5263	9.61	4.8	1.75	3.49	3.49	3.49	3.93	6.11	3.49	4.8	11.35	1.75	3.49	6.55	3.06	7.86	6.99	3.06	4.37	6.55
ENSMUSG00000000247	ENSMUST00000000253	Lhx2									1015	69	1221	58	604	36	18975	0	-5.128	-23.27	5	0	0	2	0	0	0	13.17	49.6296	10.1	6.16	4.19	5.42	3.69	4.19	3.45	6.4	3.69	1.97	9.85	5.67	2.46	2.96	5.17	9.11	7.88	0.49	3.2	3.94
ENSMUSG00000000248	ENSMUST00000000254	Clec2g	0.672323	0.498991	0.173332	0.632276	0.547322	0.0849541	-0.0883781	0.0483314	36	44	810	46	1617	37	50324	0	2.782	9.629	7	0	0	6	0	0	4	0	29.4776	6.32	4.46	7.81	1.86	4.46	5.95	2.6	5.2	2.97	5.58	7.06	5.2	3.35	3.72	4.83	8.55	6.69	3.72	5.2	4.46
ENSMUSG00000000253	ENSMUST00000000260	Gmpr									213	74	1038	54	329	55	38939	0.906	-5.239	-2.11	9	0	0	0	0	0	0	0	36.9186	7.54	4.64	2.32	5.22	2.61	6.38	2.61	9.86	3.48	4.93	6.96	6.38	3.48	4.64	2.9	7.25	6.67	0.29	2.32	9.57
ENSMUSG00000000266	ENSMUST00000112993	Mid2	1	-1.92752	2.92752						24	32	2058	46	3834	36	89688	0	2.5	6.586	9	0	3	13	0	0	0	0	30.2632	5.69	5.26	5.99	4.82	4.38	6.86	4.67	3.36	3.21	6.28	9.05	5.84	2.63	3.8	4.82	8.91	5.26	1.02	2.63	5.55
ENSMUSG00000000275	ENSMUST00000107896	Trim25	0.844399	0.598757	0.245641	0.828198	0.610121	0.218076	-0.027565	0.011364	113	65	1905	53	3572	46	20918	3.146	-1.973	-20.371	9	0	0	1	0	0	2	0	42.0221	6.62	3.79	3.63	4.1	4.26	7.1	5.52	4.26	3.63	3.31	8.36	9.31	2.21	4.26	5.52	7.41	5.99	1.1	2.84	6.78
ENSMUSG00000000276	ENSMUST00000000285	Dgke	0.763624	0.627886	0.135739	0.697766	0.345385	0.35238	0.216642	-0.282501	363	70	1695	49	3150	41	23167	0	-1.051	-19.936	11	0	2	10	0	0	0	0	30.9059	4.61	5.14	3.9	6.03	4.96	5.32	4.26	8.16	2.84	4.96	10.82	6.38	2.66	3.37	5.14	5.14	4.61	2.13	3.19	6.38
ENSMUSG00000000278	ENSMUST00000000287	Scpep1	0.333135	0.246197	0.0869384	0.284194	0.216189	0.0680055	-0.0189329	-0.0300083	96	66	1359	50	642	44	31446	0	-1.385	-10.806	13	0	0	3	0	0	0	0	31.4856	6.64	2.21	3.76	5.53	1.11	5.53	4.42	7.08	1.11	4.2	11.5	7.3	3.54	4.87	3.98	8.19	4.42	3.54	3.76	7.3
ENSMUSG00000000282	ENSMUST00000000291	Mnt	0.713418	0.679655	0.0337628	0.779972	0.810404	-0.030433	-0.0641957	0.130749	409	62	1776	63	2405	55	14806	1.425	-4.512	-34.864	6	0	0	1	0	0	0	0	47.7966	11	4.74	2.2	1.69	0.17	6.43	7.45	4.23	4.57	3.21	10.83	4.23	1.18	0.51	17.26	5.08	7.61	0.34	0.51	6.77
ENSMUSG00000000290	ENSMUST00000000299	Itgb2	0.689983	0.15079	0.539193	0.538454	0.318724	0.21973	-0.319463	0.167934	211	56	2313	54	446	43	35435	2.46	-5.098	-4.429	16	0	1	2	0	0	0	4	40.7022	4.68	4.94	5.32	5.84	7.27	5.58	5.45	8.31	1.69	4.16	8.44	6.36	1.56	3.64	4.68	7.66	4.94	0.65	2.6	6.23
ENSMUSG00000000295	ENSMUST00000000304	Hddc2	0.903033	0.511995	0.391038	0.864006	0.742739	0.121267	-0.269771	0.230744	32	55	600	50	226	42	14822	0	-2.188	0.354	6	0	0	0	0	0	0	0	33.3333	8.54	7.54	2.51	6.03	1.51	12.56	4.52	4.52	2.01	3.52	10.05	5.53	4.52	2.01	4.02	7.04	3.52	1.01	3.02	6.03
ENSMUSG00000000296	ENSMUST00000000305	Tpd52l1									228	68	615	48	465	39	113583	0.6	0.534	-15.443	7	0	0	4	0	0	0	0	39.9015	8.82	4.41	4.41	3.43	0.49	10.78	5.88	6.86	3.43	2.94	8.33	7.35	3.92	3.43	0.98	10.78	8.33	0.49	0.98	3.92
ENSMUSG00000000301	ENSMUST00000000310	Pemt	1	0.281486	0.718514	0.600743	0.366244	0.234499	-0.484015	0.0847577	149	60	600	54	204	56	75864	0	-7.39	-1.241	7	0	0	0	0	0	0	0	32.8283	7.54	4.52	3.02	2.01	1.51	3.52	2.01	7.04	2.51	4.02	14.07	2.51	3.52	8.04	4.52	7.04	7.54	3.02	5.03	7.04
ENSMUSG00000000303	ENSMUST00000000312	Cdh1	0.092018	0.547542	-0.455524	0.551619	0.258988	0.29263	0.748154	-0.288554	144	67	2655	53	1631	43	66896	0	-1.689	-17.762	16	0	0	2	0	0	0	0	37.4858	6.9	5.2	4.86	8.14	1.02	7.47	3.62	5.77	2.38	4.98	8.48	3.96	1.47	3.51	6.9	5.88	7.35	0.9	2.94	8.26
ENSMUSG00000000317	ENSMUST00000000326	Bcl6b									42	66	1425	57	1899	46	5612	0	-3.409	-21.386	9	0	1	2	0	0	0	0	36.1522	8.65	7.59	2.53	2.11	4.22	5.06	3.8	8.44	4.43	2.32	9.49	4.22	0.63	3.59	9.07	10.13	5.91	0.21	2.95	4.64
ENSMUSG00000000318	ENSMUST00000178945	Clec10a									1289	47	927	54	116	34	4179	0	-5.337	9.194	10	3	1	0	0	0	0	0	37.785	5.19	5.19	5.19	5.52	1.95	7.14	5.84	5.52	2.27	2.27	13.31	6.17	0.32	3.25	3.57	10.39	5.19	3.57	1.3	6.82
ENSMUSG00000000320	ENSMUST00000000329	Alox12	1	0.841815	0.158185	-0.189032	1	-1.18903	-1.34722	0.158185	81	63	1992	54	928	44	13897	0	-4.917	-8.052	14	0	0	2	0	0	0	0	33.2326	6.94	5.88	2.87	5.58	2.11	6.33	6.18	6.18	2.87	3.77	13.12	3.92	2.71	4.07	6.64	4.37	5.28	2.56	2.41	6.18
ENSMUSG00000000325	ENSMUST00000090103	Arvcf	0.746903	-0.0771803	0.824084	0.846382	0.116564	0.729818	-0.0942652	0.193744	253	68	2889	60	1480	51	58801	0	-10.619	-1.241	19	0	0	2	0	0	0	3.45	42.768	8.73	9.46	2.6	6.55	1.04	7.48	3.33	8.42	2.08	1.77	10.4	3.64	1.25	1.77	7.48	7.69	6.34	1.14	1.77	7.07
ENSMUSG00000000326	ENSMUST00000165430	Comt	0.355809	0.0992402	0.256569	0.468112	0.287188	0.180924	-0.0756442	0.187948	229	52	798	57	951	42	6609	0	-8.228	3.832	5	0	0	2	0	0	0	7.23	37.8788	7.55	4.15	1.51	6.42	1.51	4.91	4.91	7.92	2.26	4.15	15.85	4.91	3.4	2.64	4.91	5.66	3.4	1.51	4.53	7.92
ENSMUSG00000000339	ENSMUST00000143425	Rtca	0.917185	0.585097	0.332087	0.900248	0.536233	0.364015	0.0319275	-0.0488639	144	71	342	61	251	45	8588	0.818	-18.128	-39.357	6	0	1	2	0	0	0	0	44.6429	4.42	9.73	0	2.65	3.54	7.08	4.42	15.04	2.65	5.31	11.5	2.65	2.65	1.77	5.31	7.08	7.08	0	0	7.08
ENSMUSG00000000340	ENSMUST00000000349	Dbt	0.833422	0.617664	0.215758	0.692915	0.417257	0.275658	0.0598998	-0.200407	71	58	1449	48	1781	35	36912	0	0.716	-10.806	11	0	2	4	0	0	0	0	29.5218	7.47	4.56	3.32	5.19	1.24	5.6	4.36	6.43	1.45	6.64	9.54	7.47	2.07	3.94	6.02	6.85	6.43	0.83	2.7	7.88
ENSMUSG00000000346	ENSMUST00000000356	Dazap2	0.781356	0.553771	0.227585	0.482013	0.327375	0.154638	-0.0729468	-0.226397	363	72	507	53	1265	41	5413	0.73	-5.244	4.267	4	0	0	3	0	0	0	0	25.1497	12.5	1.79	3.57	1.79	0.6	1.19	5.36	12.5	1.19	2.38	5.36	1.19	3.57	2.98	17.86	5.36	5.95	0.6	7.14	7.14
ENSMUSG00000000355	ENSMUST00000000365	Mcts1	0.755785	0.539847	0.215938	0.697394	0.184584	0.512809	0.296872	-0.355263	113	55	546	35	124	42	12772	0	7.704	10.209	6	0	0	0	0	0	0	0	11.6667	4.97	2.21	4.97	3.31	2.21	6.63	4.42	7.18	3.87	9.39	9.39	10.5	3.87	4.42	6.08	2.76	3.31	1.1	2.76	6.63
ENSMUSG00000000365	ENSMUST00000095793	Rnf17									120	60	4923	39	221	31	122452	0	5.857	-18.777	37	0	11	1	0	0	0	0	19.5851	4.57	3.17	3.84	5.49	3.35	9.45	3.66	4.09	2.56	5.98	10.06	8.29	2.38	3.17	5.85	8.41	4.94	1.22	2.8	6.71
ENSMUSG00000000374	ENSMUST00000217980	Trappc10	0.66966	0.425026	0.244634	0.668664	0.483444	0.18522	-0.0594147	0.0584189	120	86	303	50	253	51	27436	1.5	-2.94	-28.632	5	0	2	0	0	0	0	0	33.3333	5	4	4	2	5	10	5	3	2	4	10	5	4	5	11	4	6	2	4	5
ENSMUSG00000000378	ENSMUST00000000388	Ccm2	0.825954	0.472271	0.353683	0.812641	0.675924	0.136717	-0.216966	0.203653	113	83	1362	54	383	55	49858	1.191	-4.7	-49.357	10	0	2	1	1	0	0	3.23	40.0442	6.62	5.52	1.32	7.73	1.77	7.06	3.31	5.96	3.53	5.52	10.38	5.3	1.55	3.53	4.86	12.14	5.96	0.44	2.21	5.3
ENSMUSG00000000384	ENSMUST00000150697	Tbrg4	0.820331	0.47908	0.34125	0.887701	0.55896	0.328741	-0.0125092	0.0798797	207	57	1098	57	936	55	9619	0	-6.312	-7.617	12	0	0	0	0	0	0	0	36.8132	7.12	6.85	1.1	2.47	2.47	7.67	4.66	3.01	3.56	2.19	18.36	5.48	3.01	3.56	4.66	9.32	5.21	1.1	1.92	6.3
ENSMUSG00000000385	ENSMUST00000000395	Tmprss2									230	62	1473	51	1458	47	46514	0	-2.822	-14.574	14	1	1	0	0	0	0	0	33.9468	6.53	3.47	4.9	4.08	4.69	3.06	4.29	8.57	2.24	4.69	7.55	4.49	2.45	1.84	6.53	11.43	4.49	3.06	4.69	6.94
ENSMUSG00000000386	ENSMUST00000023655	Mx1	0.365398	0.470166	-0.104768	0.850371	0.732893	0.117478	0.222246	0.262728	396	46	1884	47	1105	45	15870	0	-1.816	8.035	15	0	0	1	0	0	0	6.34	33.3866	4.78	5.58	3.03	5.74	2.39	8.13	5.58	4.78	1.28	7.18	10.85	7.97	1.44	3.99	3.51	7.5	6.7	0.64	2.23	6.7
ENSMUSG00000000392	ENSMUST00000102732	Fap	-0.325735	-0.46376	0.138025	-0.134973	-0.587399	0.452426	0.314401	-0.123639	224	45	2286	40	241	43	73133	0	5.807	7.745	26	0	5	1	0	0	0	3.93	18.8158	5.65	4.47	4.34	4.99	1.58	5.65	4.07	6.04	2.23	6.57	7.23	5.78	1.45	4.6	4.6	8.02	5.26	2.63	8.02	6.83
ENSMUSG00000000394	ENSMUST00000102733	Gcg									97	53	543	51	448	33	9121	0	-0.455	2.817	6	0	1	1	0	0	0	0	40.2235	7.78	7.78	4.44	8.33	0	8.89	5	5	3.33	5	6.67	5.56	2.78	5.56	2.22	7.22	6.67	2.22	2.22	3.33
ENSMUSG00000000399	ENSMUST00000088194	Ndufa9	0.899685	0.286543	0.613142	0.847537	0.218153	0.629384	0.0162421	-0.0683902	93	50	1122	49	23	60	27130	0.721	-0.743	9.484	11	0	0	0	0	0	0	0	29.3011	6.17	6.7	2.95	4.56	1.61	5.09	1.88	6.97	4.02	6.17	8.04	5.36	1.88	6.17	5.63	7.24	5.09	1.88	2.95	9.65
ENSMUSG00000000402	ENSMUST00000000412	Egfl6									197	64	1653	48	854	36	62714	0	-0.065	-23.559	12	0	0	1	0	0	0	0	28.7796	4.36	6.55	5.27	5.64	6.91	6.55	2.73	9.09	2.18	2.55	8.73	8.73	1.27	2.55	5.45	5.27	4.73	1.45	3.27	6.73
ENSMUSG00000000409	ENSMUST00000167288	Lck	0.76987	0.355491	0.414378	0.829125	0.507664	0.321461	-0.092917	0.152172	57	57	1563	54	454	48	10029	1.464	-5.088	-23.414	13	0	0	0	0	0	0	0	40.8478	5.58	5	4.81	5.38	1.73	8.27	4.23	6.92	2.31	5.77	9.62	4.62	2.5	4.23	6.54	6.54	5	2.12	3.65	5.19
ENSMUSG00000000411	ENSMUST00000000421	Tssk3									416	58	807	51	57	39	2009	0	-6.604	1.948	2	1	0	0	0	0	0	20.62	36.7041	5.6	4.48	1.87	5.6	2.61	7.09	4.85	7.84	2.61	5.6	11.57	7.46	3.36	4.48	4.85	5.97	3.73	1.49	2.61	6.34
ENSMUSG00000000420	ENSMUST00000000430	Galnt1	0.659975	0.467935	0.19204	0.464787	0.387419	0.0773684	-0.114672	-0.0805167	335	49	1680	43	1962	39	81475	0.874	2.424	13.832	13	1	2	4	0	0	0	13.31	22.043	3.76	6.8	4.83	5.72	2.86	6.8	3.58	6.62	2.5	5.72	9.12	6.08	3.22	4.29	4.83	5.37	5.19	1.97	3.04	7.69
ENSMUSG00000000439	ENSMUST00000000449	Mkrn2	0.873131	0.798309	0.0748219	0.831407	0.543994	0.287413	0.212591	-0.254315	86	79	1251	51	4893	45	20723	0.739	-1.032	-16.603	8	0	0	9	0	0	0	0	33.9759	6.49	5.77	3.13	4.81	5.77	7.69	3.85	6.25	3.37	3.37	6.01	6.73	2.64	4.09	7.21	9.38	4.33	0.72	3.61	4.81
ENSMUSG00000000440	ENSMUST00000000450	Pparg									45	35	1518	47	204	26	68334	0	2.134	0.499	7	0	2	4	0	0	0	0	30.754	6.14	3.96	3.17	6.93	1.98	6.93	4.55	4.36	3.17	6.93	10.1	7.52	3.56	5.35	5.15	7.13	4.55	0.2	3.56	4.75
ENSMUSG00000000441	ENSMUST00000000451	Raf1	0.782561	0.386013	0.396548	0.774131	0.624322	0.149809	-0.24674	0.23831	426	68	1947	49	697	47	58067	0	-1.012	-3.125	17	0	0	1	0	0	0	6.63	31.9938	5.71	6.33	4.17	4.63	2.16	4.48	5.25	5.56	3.55	4.78	8.33	5.71	3.09	4.32	5.56	10.19	6.02	1.39	2.31	6.48
ENSMUSG00000000486	ENSMUST00000106313	2024-09-01	0.548507	-0.010015	0.558522	0.407875	0.0833329	0.324542	-0.23398	0.0933479	153	54	1017	55	115	63	3661	3.129	-5.957	-4.429	10	0	0	0	0	0	0	0	41.2463	5.33	8.88	2.96	6.51	2.37	10.36	6.51	5.62	1.78	4.73	10.36	5.03	2.66	3.25	4.44	5.62	4.14	0.59	2.07	6.8
ENSMUSG00000000489	ENSMUST00000000500	Pdgfb	1	0.797437	0.202563	0.936961	0.897643	0.039318	-0.163245	0.100206	810	69	726	59	1408	53	18935	0	-6.514	-18.342	7	0	0	3	0	0	0	7.08	44.1667	7.47	11.62	3.32	4.56	4.56	7.05	3.73	3.73	2.9	4.15	8.71	5.81	1.66	2.49	5.81	6.64	6.22	0.83	0.83	7.88
ENSMUSG00000000530	ENSMUST00000000542	Acvrl1	0.862772	0.0623026	0.80047	0.886734	0.032574	0.85416	0.05369	-0.0297286	272	63	1509	57	1859	54	16815	0.599	-7.209	-7.038	11	0	0	2	0	0	0	0	40.7186	5.98	7.17	3.39	4.98	3.59	5.58	4.38	6.57	3.78	3.98	12.15	3.78	2.19	3.19	5.18	7.57	4.98	1.99	2.39	7.17
ENSMUSG00000000531	ENSMUST00000000543	Grasp	0.350509	-0.26697	0.617479	0.820202	0.643067	0.177135	-0.440345	0.910037	114	67	1179	65	740	53	8569	0	-13.305	-14.719	8	0	0	2	0	0	1	0	52.1739	11.73	8.93	1.53	2.81	1.28	7.91	4.08	10.2	1.79	2.3	11.22	3.83	0.77	2.81	8.67	6.63	5.1	0.77	3.06	4.59
ENSMUSG00000000532	ENSMUST00000000544	Acvr1b	0.772953	0.291864	0.481089	0.867282	0.454066	0.413216	-0.0678731	0.162201	78	80	1518	54	2822	51	39618	0	-3.284	-25.009	9	0	1	5	1	0	8	0	35.3175	6.73	5.94	3.56	5.54	3.37	5.54	3.17	7.52	3.17	6.53	10.1	4.75	2.97	3.17	3.96	6.34	4.36	1.98	3.56	7.72
ENSMUSG00000000538	ENSMUST00000095254	Tom1l2	-0.443412	-0.366068	-0.0773444	0.395068	0.531957	-0.136889	-0.0595447	0.898025	97	73	1464	54	3379	54	126192	1.787	-2.087	-14.864	14	0	0	3	0	0	0	0	38.4774	7.6	6.16	4.72	6.16	1.23	8.62	4.31	5.34	1.23	3.9	10.27	3.7	2.46	2.67	6.98	9.45	6.78	0.41	1.44	6.57
ENSMUSG00000000552	ENSMUST00000168828	Zfp385a									37	72	1161	60	1100	63	26199	0	-6.901	-9.357	8	0	0	0	0	0	0	0	37.4026	9.84	5.7	2.59	1.55	1.55	5.44	3.63	9.84	3.11	3.63	10.36	6.22	1.55	1.81	14.25	8.81	3.89	0	1.3	4.92
ENSMUSG00000000555	ENSMUST00000023128	Itga5	0.820224	0.7658	0.0544239	0.941657	0.761067	0.180589	0.126165	-0.00473237	237	74	3162	55	983	54	22478	0	-6.964	-13.27	30	0	2	2	0	0	0	0	36.7871	6.65	4.46	3.51	4.56	1.9	5.22	6.27	9.59	1.61	3.51	11.68	3.8	0.85	4.27	7.22	8.55	4.75	1.33	3.89	6.36
ENSMUSG00000000560	ENSMUST00000197284	Gabra2	-0.607287	-0.575921	-0.0313661	0.498929	0.319822	0.179106	0.210472	0.895744	291	53	1356	42	4205	35	138253	0	4.132	10.788	10	0	5	15	0	0	0	0	22.2222	6.43	4.21	5.99	5.1	1.11	3.77	2.22	4.21	1.33	5.32	9.09	6.87	3.33	5.1	4.88	7.32	8.87	2.22	4.21	8.43
ENSMUSG00000000561	ENSMUST00000010278	Wdr77	0.712812	0.525859	0.186953	0.736352	0.438647	0.297705	0.110752	-0.0872119	215	59	1029	53	2438	41	10392	0	-4.671	-17.183	10	0	0	2	0	0	0	0	29.6188	8.48	4.09	2.92	6.43	3.51	4.97	3.22	5.56	3.22	2.05	10.23	2.92	0.88	2.92	6.73	12.87	4.97	2.92	1.17	9.94
ENSMUSG00000000562	ENSMUST00000000574	Adora3	0.799748	0.683631	0.116118						379	52	960	48	1031	47	4506	0	1.199	0.643	2	0	0	1	0	0	0	8.75	25.4717	6.9	4.7	3.76	3.13	3.13	2.51	1.88	2.82	1.25	7.21	14.73	3.76	4.08	7.21	2.19	7.21	7.84	2.19	3.76	9.72
ENSMUSG00000000563	ENSMUST00000118209	Atp5f1	0.897873	0.533099	0.364774	0.724607	0.313108	0.411498	0.0467248	-0.219991	545	58	771	46	288	34	17402	1.756	0.799	-13.559	8	0	1	1	0	0	0	2.62	31.7647	8.98	4.3	2.34	2.73	0.78	8.2	6.25	5.08	2.34	6.64	10.55	8.98	2.73	3.52	4.69	4.69	4.3	0.39	4.3	8.2
ENSMUSG00000000568	ENSMUST00000172361	Hnrnpd	0.812207	0.646957	0.16525	0.622917	0.47055	0.152366	-0.0128834	-0.176407	314	67	1068	50	5429	38	23004	7.491	-2.919	-13.704	9	0	1	10	0	0	0	0	38.1356	9.01	3.94	4.51	4.23	0.85	8.45	5.07	16.34	1.41	2.82	2.54	9.01	2.25	3.94	3.1	7.61	3.38	1.41	5.92	4.23
ENSMUSG00000000579	ENSMUST00000092966	Dynlt1c	0.367358	0.133617	0.233742	0.315904	0.362032	-0.0461284	-0.27987	0.228415	139	65	342	49	2108	47	8009	0	-2.862	-7.762	5	0	1	2	0	0	0	0	33.0357	6.19	1.77	4.42	3.54	3.54	7.08	5.31	6.19	1.77	6.19	5.31	5.31	2.65	4.42	0.88	12.39	8.85	2.65	2.65	8.85
ENSMUSG00000000581	ENSMUST00000000594	C1d	0.958779	0.926477	0.032303	0.893038	0.877575	0.0154629	-0.0168401	-0.0489014	74	55	426	43	2481	33	11583	0	4.336	4.846	5	0	1	7	0	0	0	3.42	25.7143	9.93	4.26	4.96	4.96	0	9.22	2.84	3.55	2.13	2.13	9.93	12.06	4.96	1.42	4.26	6.38	4.26	1.42	2.84	8.51
ENSMUSG00000000594	ENSMUST00000000608	Gm2a	0.671131	0.381387	0.289744	0.31806	0.273142	0.0449184	-0.244826	-0.108245	49	62	582	56	3496	46	14915	0	-4.846	-5.299	4	0	0	0	0	0	0	0	39.0625	4.15	3.11	2.07	4.15	4.15	6.22	2.59	8.81	1.55	5.7	13.99	5.7	0.52	2.07	9.84	8.81	4.66	1.55	2.59	7.77
ENSMUSG00000000600	ENSMUST00000200386	Krit1	0.550223	0.387182	0.163042	0.668356	0.479884	0.188472	0.0254302	0.0927025	342	59	1944	40	57	27	42375	0	6.818	8.18	16	0	3	0	0	0	0	0	20.8978	6.18	4.33	5.26	3.71	1.7	7.11	4.64	4.95	2.94	7.11	11.28	8.81	2.01	3.25	5.41	5.87	4.79	1.08	4.17	5.41
ENSMUSG00000000605	ENSMUST00000000619	Clcn4	0.622281	0.320869	0.301413	0.53403	0.301999	0.232031	-0.0693816	-0.0188695	488	55	2244	53	1875	38	17225	0	-6.467	-18.777	13	2	2	3	0	0	0	12.89	33.244	7.63	5.62	2.68	4.28	2.14	5.62	1.87	7.1	1.87	6.29	11.38	3.75	2.95	5.49	4.82	6.56	6.29	2.54	3.35	7.76
ENSMUSG00000000617	ENSMUST00000171427	Grm6	0.524087	0.117664	0.406423	0.595657	0.676859	-0.0812023	-0.487626	0.559196	166	54	2616	60	1548	44	15522	0	-8.59	-14.574	11	0	0	6	0	0	0	0	41.2644	9.53	6.43	2.64	3.56	2.64	5.63	3.79	8.27	1.95	5.63	9.53	2.99	2.3	3.67	5.97	7.35	6.43	1.72	2.99	7
ENSMUSG00000000627	ENSMUST00000000641	Sema4f	0.493558	-0.0801951	0.573753	0.516234	0.42338	0.0928538	-0.480899	0.503575	146	69	2334	58	1606	52	27885	0	-9.182	-21.82	14	0	0	1	0	0	0	0	36.4691	9.01	7.46	1.8	5.02	2.96	5.41	3.47	7.98	2.57	2.96	10.42	2.32	1.54	4.12	8.62	7.72	5.41	1.42	1.8	7.98
ENSMUSG00000000628	ENSMUST00000000642	Hk2	0.929505	0.827793	0.101712	0.878264	0.878574	-0.000310464	-0.102022	0.0507811	474	52	2754	55	2285	45	49430	0.489	-6.979	5.136	18	0	0	6	0	0	0	0	40.8297	6.11	6.87	2.84	6.76	2.84	7.85	3.38	8.62	2.4	5.13	10.14	5.78	4.14	4.14	2.29	4.8	5.67	0.55	1.74	7.96
ENSMUSG00000000631	ENSMUST00000102488	Myo18a	0.382346	-0.160396	0.542742	0.616523	0.320382	0.296141	-0.246601	0.480777	156	52	6108	57	1145	57	93830	4.574	-6.456	9.919	41	0	0	2	0	0	0	0	46.2635	8.45	7.71	2.51	5.9	0.88	11.06	6.44	4.77	2.16	2.95	12.04	7.47	2.56	2.7	3.1	8.85	3.93	0.84	1.38	4.32
ENSMUSG00000000673	ENSMUST00000000687	Haao	1	1	0						33	66	861	56	487	53	15594	0	-5.693	-2.69	10	0	0	0	0	0	0	0	41.0526	4.55	6.99	2.1	5.24	1.05	8.04	7.34	7.69	2.8	3.85	9.79	4.9	2.8	3.85	6.29	6.64	3.85	2.8	2.45	6.99
ENSMUSG00000000673	ENSMUST00000000687	Haao	1	1	0						33	66	861	56	487	53	15594	0	-5.693	-2.69	10	0	0	0	0	0	0	0	41.0526	4.55	6.99	2.1	5.24	1.05	8.04	7.34	7.69	2.8	3.85	9.79	4.9	2.8	3.85	6.29	6.64	3.85	2.8	2.45	6.99
ENSMUSG00000000673	ENSMUST00000234863	Haao	1	1	0						73	62	210	52	441	56	11968	0	-0.837	-8.052	7	0	0	0	0	0	0	0	23.5294	5.8	8.7	4.35	1.45	1.45	5.8	7.25	5.8	2.9	0	10.14	2.9	2.9	2.9	11.59	11.59	1.45	2.9	1.45	8.7
ENSMUSG00000000673	ENSMUST00000234863	Haao	1	1	0						73	62	210	52	441	56	11968	0	-0.837	-8.052	7	0	0	0	0	0	0	0	23.5294	5.8	8.7	4.35	1.45	1.45	5.8	7.25	5.8	2.9	0	10.14	2.9	2.9	2.9	11.59	11.59	1.45	2.9	1.45	8.7
ENSMUSG00000000682	ENSMUST00000000696	Cd52	0.762206	0.669587	0.0926189	0.393851	0.439406	-0.0455551	-0.138174	-0.230181	98	48	225	47	191	54	1547	0	6.452	1.223	2	0	0	0	0	0	0	0	28.7671	9.46	0	4.05	1.35	2.7	0	4.05	6.76	0	8.11	14.86	6.76	2.7	8.11	1.35	13.51	12.16	0	1.35	2.7
ENSMUSG00000000686	ENSMUST00000094004	Abhd15	0.816271	0.671637	0.144633	0.252067	0.180446	0.0716205	-0.0730129	-0.491191	78	71	1380	62	1204	50	4925	1.469	-14.335	-15.878	2	0	0	0	0	0	0	0	41.2664	8.5	9.15	1.53	3.7	3.49	6.54	1.74	7.84	3.27	2.61	14.38	1.96	0.65	4.58	8.5	8.28	3.27	2.61	2.4	5.01
ENSMUSG00000000690	ENSMUST00000173432	Hoxb6									648	47	675	64	641	52	9094	0	-13.673	-5.878	3	1	0	0	0	0	0	6.89	56.5022	8.93	7.59	2.23	3.13	2.68	8.48	4.91	7.59	1.79	1.79	6.25	5.36	1.79	4.46	9.38	9.82	4.02	1.34	6.7	1.79
ENSMUSG00000000693	ENSMUST00000000707	Loxl3									144	59	2265	56	1689	48	18390	0	-8.709	-0.516	14	0	0	0	0	0	2	0	37.583	6.76	6.9	3.45	4.38	5.17	6.9	3.98	10.21	4.51	3.58	7.56	3.45	1.46	2.92	3.58	7.43	5.17	2.92	2.65	7.03
ENSMUSG00000000708	ENSMUST00000000724	Kat2b	-0.0490658	-0.0643604	0.0152945	0.00529743	-0.039407	0.0447044	0.0294099	0.0249534	359	79	2442	49	1852	34	105750	0	-0.721	-35.733	18	0	0	9	2	0	0	3.42	33.1281	6.15	5.66	4.06	2.83	2.09	8.12	3.94	6.52	2.34	5.78	8.36	8.61	2.21	4.18	6.89	7.63	4.92	0.86	3.69	5.17
ENSMUSG00000000711	ENSMUST00000000727	Rab5b	0.781492	0.608133	0.173358	0.74683	0.553153	0.193677	0.0203189	-0.0549806	177	58	648	49	2355	47	19090	1.238	-3.422	5.716	6	0	1	5	0	0	0	0	37.3832	12.09	4.65	4.65	4.19	1.86	6.05	7.91	5.58	1.4	3.72	8.37	6.51	2.33	3.72	2.79	8.37	5.58	0.93	3.26	6.05
ENSMUSG00000000730	ENSMUST00000138785	Dnmt3l									283	54	1266	53	273	46	21336	0	-3.548	6.441	14	0	0	0	0	0	0	8.79	35.7143	3.33	6.89	2.14	6.41	4.99	6.89	4.51	5.94	1.43	2.85	11.4	5.23	1.66	4.51	6.18	9.26	5.23	1.9	3.33	5.94
ENSMUSG00000000731	ENSMUST00000128241	Aire	-0.325735	1	-1.32573						57	74	1659	60	222	56	13559	0	-9.638	-22.4	14	0	0	0	0	0	0	0	43.3757	9.6	6.52	2.54	4.89	3.62	5.62	3.99	7.97	2.9	2.72	10.69	5.07	0.72	2.54	10.69	8.7	4.17	0.91	0.72	5.43
ENSMUSG00000000732	ENSMUST00000105393	Icosl	0.815586	0.381791	0.433795	0.661913	-0.219907	0.881819	0.448024	-0.601697	223	66	969	49	1622	51	10224	0	-0.578	6.73	7	0	1	1	0	0	0	0	32.0872	4.97	4.35	7.45	3.11	2.48	4.66	3.73	4.97	2.48	3.73	11.49	4.04	1.55	3.73	4.97	9.63	8.07	1.24	4.35	9.01
ENSMUSG00000000738	ENSMUST00000149248	Spg7	0.186371	-0.257657	0.444028	0.557695	0.227633	0.330062	-0.113966	0.48529	348	58	2346	56	202	45	32582	0	-7.949	-27.038	17	0	0	2	0	0	0	0	40	10.5	7.17	2.69	3.84	0.51	7.81	3.84	8.58	2.05	4.1	11.01	5.76	3.33	4.23	5.38	5.76	4.1	0.77	2.05	6.53
ENSMUSG00000000740	ENSMUST00000000756	Rpl13	0.0562659	0.0447165	0.0115493	0.107366	0.0778883	0.0294778	0.0179285	0.0331718	102	59	636	57	42	33	2895	0	-6.818	-13.414	6	0	0	0	0	0	0	0	48.5714	11.37	14.22	3.32	2.37	0.47	6.16	3.79	4.27	1.9	5.69	5.69	11.85	1.9	3.32	6.64	5.21	3.79	0.95	1.42	5.69
ENSMUSG00000000743	ENSMUST00000000759	Chmp1a	0.679055	0.161604	0.517451	0.627377	0.229477	0.3979	-0.119552	0.0678729	88	76	591	56	1461	54	8497	0	-7.716	-8.777	7	0	0	0	0	0	1	0	49.7436	12.24	4.59	4.08	6.12	0.51	7.65	9.18	2.55	0.51	1.53	9.69	9.69	3.57	1.53	1.02	8.16	5.61	0.51	0.51	10.71
ENSMUSG00000000751	ENSMUST00000092907	Rpa1	0.693757	0.0707714	0.622986	0.743512	0.141079	0.602433	-0.0205529	0.0703075	66	71	1872	49	3139	47	50159	2.103	-1.415	-11.675	17	0	1	3	0	0	0	0	36.9775	6.9	4.49	6.1	5.14	1.77	5.94	6.42	7.7	0.96	5.46	6.9	7.06	2.57	4.33	4.01	7.87	5.3	0.96	2.89	7.22
ENSMUSG00000000753	ENSMUST00000000769	Serpinf1									213	52	1254	55	365	48	12933	0	-3.126	-9.067	8	0	0	1	0	0	0	10.71	43.0288	6.24	5.04	3.12	5.04	0.24	6	3.6	5.28	1.92	4.56	13.67	5.52	1.92	4.56	6.47	10.31	6.95	0.96	2.16	6.47
ENSMUSG00000000759	ENSMUST00000000776	Tubgcp3	0.344443	0.22311	0.121333	0.526346	0.481611	0.0447351	-0.0765983	0.258501	218	67	2718	51	861	42	57972	0.833	-2.376	-17.617	22	0	1	2	1	0	0	3.33	34.4027	6.74	7.18	3.31	5.41	1.44	5.97	6.3	5.08	3.31	4.2	13.04	4.97	1.99	4.09	3.65	7.73	5.41	1.22	3.43	5.52
ENSMUSG00000000776	ENSMUST00000000793	Polr3d	0.801588	0.715412	0.0861758	0.867361	0.77772	0.089641	0.00346524	0.0623079	120	67	1197	55	699	46	4691	1.532	-5.536	-3.994	9	0	0	2	0	0	2	3.42	40.3023	4.27	7.04	2.01	6.53	0.75	11.06	3.52	8.54	2.01	3.77	9.8	10.05	3.27	2.01	8.04	5.28	5.28	0.5	0	6.28
ENSMUSG00000000782	ENSMUST00000109071	Tcf7	0.775915	0.386352	0.389563	0.728875	0.458116	0.270759	-0.118804	0.0717635	152	84	1260	59	647	53	30096	3.653	-5.75	-43.849	11	0	0	0	0	0	0	2.65	44.7368	10.5	4.77	2.15	3.58	0.72	7.4	5.25	9.31	3.82	1.67	8.83	6.21	2.39	2.39	12.65	7.4	3.34	0.72	3.58	3.34
ENSMUSG00000000787	ENSMUST00000000804	Ddx3x	0.929214	0.830165	0.0990486	0.712069	0.47738	0.234689	0.13564	-0.352785	143	59	1989	45	2560	35	13083	4.018	0.336	-0.516	17	0	3	7	0	0	0	0	23.1467	5.74	8.31	3.63	7.1	1.06	6.34	3.02	12.24	2.11	4.83	7.1	4.83	2.11	4.83	3.63	10.27	3.63	1.06	3.47	4.68
ENSMUSG00000000791	ENSMUST00000000808	Il12rb1	0.853116	0.161369	0.691748	0.42797	0.294372	0.133598	-0.558149	0.133003	103	59	2217	59	553	51	12976	0	-10.1	-23.704	16	0	0	0	0	0	0	0	42.4695	6.23	7.05	2.98	3.52	3.39	5.69	6.1	8.4	2.3	2.03	9.08	3.39	2.3	2.44	7.59	8.4	6.78	3.12	2.03	7.18
ENSMUSG00000000792	ENSMUST00000000809	Slc5a5									96	66	1857	60	975	51	9869	0	-10.653	-24.429	15	0	0	1	0	0	0	0	36.7909	10.52	3.72	1.94	3.4	1.94	2.27	2.75	10.52	0.65	3.56	14.56	2.1	3.24	4.05	5.83	6.96	7.77	1.94	3.88	8.41
ENSMUSG00000000804	ENSMUST00000108075	Usp32	-0.085882	-0.0621293	-0.0237527	0.0397011	0.0438458	-0.00414468	0.019608	0.105975	270	73	4815	44	1968	38	155597	1.149	3.433	-15.733	34	0	4	4	3	0	0	3.56	23.8303	4.49	5.49	5.24	5.99	2.74	6.73	4.05	6.36	2.87	4.8	10.16	5.74	1.87	3.93	5.67	8.42	4.99	1.62	3.43	5.42
ENSMUSG00000000817	ENSMUST00000000834	Fasl	0.930857	0.912542	0.0183149	0.889452	0.8951	-0.00564832	-0.0239632	-0.0174421	210	49	840	48	887	37	7807	0	0.444	-13.125	4	0	2	1	0	0	0	1.61	31.295	3.58	3.23	5.38	2.15	1.79	5.02	4.66	5.73	2.51	2.87	11.11	6.09	2.51	4.66	11.83	9.32	4.66	1.79	4.66	6.45
ENSMUSG00000000823	ENSMUST00000108789	Zfp512b	0.437546	0.400574	0.0369712	0.610706	0.572222	0.0384839	0.00151272	0.171648	385	77	2610	56	2719	51	10701	0.749	-3.893	-17.038	17	0	0	1	0	0	0	2.08	41.5899	6.1	6.9	2.07	3.45	2.99	6.44	3.45	7.71	3.45	2.76	6.44	10.47	1.73	1.84	10.7	8.98	5.29	0.92	1.5	6.79
ENSMUSG00000000826	ENSMUST00000072334	Dnajc5	0.716839	0.691799	0.0250404	0.66131	0.654181	0.00712963	-0.0179108	-0.037618	224	69	597	52	5757	47	34649	0	0.182	-6.168	5	0	1	3	0	0	0	0	42.6396	8.59	2.53	5.05	7.07	7.07	7.58	3.54	4.55	2.53	3.03	8.59	7.07	0.51	3.54	4.55	7.07	7.07	1.01	5.05	4.04
ENSMUSG00000000827	ENSMUST00000149163	Tpd52l2	0.880587	0.344606	0.535981	0.904241	0.611517	0.292724	-0.243257	0.266911	149	63	663	51	2791	42	20802	1.476	-3.758	6.586	8	0	0	1	0	0	0	0	36.0731	5.45	5.45	3.64	5.45	0.45	8.64	4.09	7.73	2.27	2.73	9.09	6.82	2.73	1.82	4.55	11.82	6.82	0.91	1.36	8.18
ENSMUSG00000000838	ENSMUST00000114655	Fmr1	0.687147	0.572085	0.115061	0.519656	0.455432	0.0642236	-0.0508377	-0.116654	15	59	1896	43	2288	30	39162	2.892	4.289	14.6	17	0	5	4	0	0	0	0	20.7937	5.55	8.08	5.55	6.02	0.95	8.87	4.28	7.92	2.54	4.44	6.18	6.81	1.43	3.17	5.39	7.45	4.6	0.79	2.22	7.77
ENSMUSG00000000861	ENSMUST00000109514	Bcl11a	1	0.396783	0.603217	0.865219	0.872195	-0.00697621	-0.610193	0.475412	218	50	2508	55	3263	34	90257	0	-6.026	5.571	4	1	0	7	0	0	0	7.14	42.3261	5.51	5.51	2.87	4.91	2.99	8.5	3.23	8.26	4.55	2.75	8.38	5.87	2.28	3.23	9.7	11.5	4.43	0.48	1.44	3.59
ENSMUSG00000000869	ENSMUST00000000889	Il4	0.524087	0.597855	-0.0737685	0.150622	0.395672	-0.245049	-0.171281	-0.202183	63	41	423	46	104	16	6210	0	-0.133	4.267	4	0	1	2	0	0	0	0	30.2158	2.14	5	5	3.57	5	7.14	2.14	4.29	2.86	5.71	13.57	7.14	4.29	4.29	2.86	10	7.86	0	1.43	5.71
ENSMUSG00000000876	ENSMUST00000000896	Pxmp4	0.899026	0.599395	0.29963	0.81547	0.663201	0.152269	-0.147361	0.063806	79	64	639	56	2071	47	17951	0	-3.286	-8.922	4	0	0	0	0	0	0	0	43.6019	9.43	5.19	4.72	1.89	0.94	2.83	5.19	5.19	5.19	4.72	15.09	4.72	2.36	5.66	4.25	7.08	3.3	1.89	4.72	5.66
ENSMUSG00000000881	ENSMUST00000000901	Dlg3	0.937596	0.664606	0.27299	0.907587	0.683803	0.223784	-0.0492063	0.0191976	350	72	2454	53	2081	45	50685	0	-3.657	-21.965	19	0	1	3	0	0	0	0	37.5	6.61	6.36	4.28	5.75	1.22	6.73	4.16	9.3	2.82	6.61	6.85	5.51	1.96	2.82	6.73	7.22	4.04	0.86	3.67	6.49
ENSMUSG00000000884	ENSMUST00000090086	Gnb1l	0.0289349	-0.770996	0.799931	0.529396	0.362522	0.166874	-0.633056	1.13352	175	67	981	57	2393	52	67792	0.997	-7.97	-10.081	8	1	0	0	0	0	0	0	36.3077	7.06	5.21	2.15	4.91	3.07	3.37	5.83	8.9	3.07	4.6	11.96	3.99	2.45	2.76	6.75	7.98	5.21	3.07	0.92	6.75
ENSMUSG00000000901	ENSMUST00000000924	Mmp11	0.775333	0.823467	-0.0481339	0.865219	0.488778	0.376441	0.424575	-0.334689	49	86	1479	58	760	48	9281	0	-7.954	-38.922	8	0	0	0	0	0	0	0	36.4562	8.74	7.93	1.83	5.69	0.81	4.47	4.07	7.52	3.66	2.44	11.18	2.85	1.02	5.89	9.76	5.08	5.08	2.85	2.85	6.3
ENSMUSG00000000902	ENSMUST00000140388	Smarcb1	0.661567	0.166597	0.49497	0.816396	0.335414	0.480982	-0.0139872	0.168817	194	70	237	58	529	52	24062	0	-8.292	-9.212	6	0	0	0	0	0	0	0	42.8571	5.13	0	1.28	2.56	2.56	11.54	11.54	11.54	6.41	1.28	8.97	3.85	6.41	5.13	11.54	3.85	1.28	0	1.28	3.85
ENSMUSG00000000915	ENSMUST00000000939	Hip1r	0.489906	0.103835	0.38607	0.595459	0.352566	0.242894	-0.143177	0.24873	135	77	3207	59	3393	52	31931	2.416	-8.377	-15.299	32	0	0	3	0	0	0	0	50.7029	10.21	6.74	2.81	4.4	1.03	10.21	7.12	4.59	2.9	3.75	11.8	6.37	2.15	2.06	3.84	8.05	4.12	0.47	1.69	5.71
ENSMUSG00000000916	ENSMUST00000170342	Nsun5	0.470995	-0.226285	0.69728	0.719656	0.397192	0.322464	-0.374816	0.623477	9	77	276	61	100	57	4230	0	-15.028	6.296	4	0	0	0	0	0	0	0	45.5556	19.78	5.49	2.2	1.1	1.1	3.3	5.49	8.79	1.1	1.1	15.38	5.49	1.1	3.3	2.2	10.99	1.1	0	4.4	6.59
ENSMUSG00000000934	ENSMUST00000000958	Top1mt	0.199263	-0.462577	0.661839	0.811012	0.489185	0.321827	-0.340012	0.951762	44	70	1782	54	77	43	21766	0	-4.387	-16.313	14	0	0	0	0	0	0	0	46.1149	7.59	7.93	3.2	4.89	2.19	8.94	5.23	4.38	3.04	2.53	9.78	9.61	2.19	4.38	4.22	4.22	4.72	1.85	2.36	6.75
ENSMUSG00000000942	ENSMUST00000101395	Hoxa4									65	44	858	68	671	44	2083	0	-10.946	15.571	2	0	0	3	0	0	0	0	62.3239	12.28	6.67	3.16	1.05	1.75	4.21	3.51	8.77	4.56	2.81	4.56	4.91	1.75	2.46	18.25	7.37	4.21	1.05	3.86	2.81
ENSMUSG00000000957	ENSMUST00000089688	Mmp14	1	0.666864	0.333136	0.669096	-0.502519	1.17162	0.838479	-1.16938	254	60	1749	55	593	49	9654	0	-5.088	-9.791	10	0	0	0	0	0	0	0	39.4148	7.39	6.19	3.95	5.15	0.86	6.36	3.44	8.93	2.06	3.95	7.73	5.67	2.75	6.36	7.73	5.15	4.47	2.41	4.12	5.33
ENSMUSG00000000958	ENSMUST00000226753	Slc7a7	0.524087	0.656026	-0.13194	0.932609	0.529444	0.403166	0.535105	-0.126583	249	50	1533	52	344	46	48238	0	-1.744	-1.241	11	0	0	1	0	0	0	0	30.4519	9.8	3.14	3.14	3.33	2.35	3.92	2.16	7.45	0.78	9.61	12.16	3.14	1.76	6.86	4.31	8.24	3.73	1.37	4.51	8.24
ENSMUSG00000000959	ENSMUST00000000985	Oxa1l	0.843859	0.679031	0.164827	0.926291	0.771201	0.15509	-0.00973761	0.0921696	14	63	1302	55	1222	47	8833	0.725	-2.998	8.325	10	0	1	1	0	0	0	0	33.3333	10.16	6.47	3.23	2.77	2.08	4.16	5.54	4.62	2.54	5.08	12.24	4.39	2.31	3.93	8.55	5.31	5.08	2.08	1.62	7.85
ENSMUSG00000000976	ENSMUST00000001002	Heatr6	0.749028	-0.162244	0.911272	0.817613	0.164156	0.653458	-0.257814	0.3264	27	47	3555	52	2032	44	30059	0.753	-2.947	-2.545	20	0	1	8	0	0	0	0	32.967	9.12	4.14	2.79	4.22	2.7	5.32	5.74	5.49	2.62	3.89	13.43	5.15	2.36	2.53	5.74	10.64	4.56	1.1	1.94	6.5
ENSMUSG00000000982	ENSMUST00000001008	Ccl3				0.77583	0.0168206	0.75901			78	50	279	51	409	40	1512	0	4.614	9.629	3	0	0	5	0	0	0	0	30.7692	7.61	4.35	3.26	4.35	6.52	4.35	5.43	2.17	0	5.43	8.7	4.35	2.17	5.43	4.35	8.7	10.87	1.09	4.35	6.52
ENSMUSG00000000983	ENSMUST00000001009	Wfdc18									103	43	225	49	193	42	2334	0	-4.009	-3.559	3	1	0	0	0	0	0	2.08	21.9178	8.11	2.7	4.05	2.7	10.81	2.7	0	9.46	1.35	1.35	4.05	8.11	5.41	5.41	10.81	6.76	9.46	1.35	0	5.41
ENSMUSG00000001014	ENSMUST00000001040	Icam4	1	0.699959	0.300041						81	65	789	59	101	36	1223	0	-12.399	-15.588	3	0	1	0	0	0	0	0	32.567	9.16	7.25	3.05	1.53	2.29	3.44	3.05	6.49	2.29	2.67	13.74	1.91	1.53	1.53	7.25	9.16	6.11	2.29	3.44	11.83
ENSMUSG00000001016	ENSMUST00000001042	Ilf2	0.845164	0.460855	0.38431	0.697798	0.418415	0.279383	-0.104927	-0.0424396	94	57	1173	48	760	38	12233	0.824	-2.597	-11.386	14	0	0	1	0	0	0	0	29.0488	6.92	5.9	3.85	4.1	1.03	9.49	3.85	7.69	1.79	5.64	10.51	4.36	2.05	3.85	6.67	5.9	6.41	0.77	1.79	7.44
ENSMUSG00000001017	ENSMUST00000107344	Chtop	0.804078	0.238817	0.565261	0.758549	0.23166	0.526888	-0.0383729	-0.00715688	1351	44	675	56	946	39	10497	2.954	-6.417	12.528	6	6	0	2	0	0	0	0	32.7354	8.48	16.52	3.57	2.68	0	1.79	7.59	20.98	0.45	3.57	11.16	4.46	4.46	0.45	4.46	3.13	3.13	0	0.89	2.23
ENSMUSG00000001018	ENSMUST00000149884	Snapin	0.776532	0.638815	0.137717	0.577979	0.413809	0.16417	0.0264528	-0.225005	59	74	411	56	1458	40	3000	0	-8.304	-22.69	4	0	0	9	0	0	0	0	38.5185	12.5	10.29	5.15	5.15	0.74	6.62	5.15	5.88	2.21	2.21	12.5	3.68	1.47	1.47	5.15	5.88	2.94	0	1.47	9.56
ENSMUSG00000001020	ENSMUST00000001046	S100a4	0.592704	0.365822	0.226882	0.0620317	0.280289	-0.218258	-0.445139	-0.0855329	51	48	306	49	141	45	2275	0	-5.837	-12.11	3	0	0	0	0	0	0	0	43	4.95	4.95	4.95	6.93	3.96	11.88	1.98	3.96	0.99	1.98	9.9	10.89	3.96	7.92	3.96	5.94	3.96	0	1.98	4.95
ENSMUSG00000001021	ENSMUST00000200508	S100a3									158	56	306	56	123	56	17820	0	-3.085	-0.661	3	0	0	0	0	0	0	0	44	4.95	3.96	1.98	4.95	8.91	11.88	4.95	2.97	0.99	1.98	8.91	6.93	1.98	4.95	7.92	4.95	4.95	0.99	5.94	4.95
ENSMUSG00000001025	ENSMUST00000198128	S100a6	0.666779	0.522772	0.144006	-0.0422911	0.245951	-0.288242	-0.432248	-0.276821	102	55	270	50	92	44	1110	0	-7.836	-7.038	3	0	0	0	0	0	0	5.19	40.9091	10.11	2.25	3.37	7.87	1.12	8.99	5.62	5.62	2.25	6.74	15.73	11.24	2.25	3.37	1.12	3.37	2.25	0	3.37	3.37
ENSMUSG00000001029	ENSMUST00000001055	Icam2	0.753369	0.447008	0.306361	0.755318	0.483997	0.271321	-0.0350402	0.0369887	297	53	834	53	151	54	5126	0.146	-5.19	6.875	4	0	0	0	0	0	0	2.31	35.5072	5.42	5.42	3.25	2.17	2.89	6.86	5.42	5.78	2.17	5.78	10.11	4.33	1.81	6.14	5.42	7.94	6.86	2.17	2.53	7.58
ENSMUSG00000001034	ENSMUST00000079080	Mapk7	0.811167	0.374544	0.436623	0.803868	0.547678	0.25619	-0.180433	0.173134	293	64	2421	57	305	49	5485	0	-5.798	-21.226	7	0	0	0	0	0	0	0	36.5217	9.93	6.82	1.74	5.46	0.99	7.07	5.09	6.45	1.86	3.72	9.8	3.6	2.11	2.73	12.53	7.69	3.97	0.74	2.11	5.58
ENSMUSG00000001036	ENSMUST00000178202	Epn2	-0.331376	-0.668144	0.336767	0.5905	0.407948	0.182552	-0.154215	1.07609	361	54	1788	54	2168	46	62438	0	-4.925	12.962	11	0	1	6	0	0	0	0	37.2054	9.58	4.54	4.54	4.03	0.5	5.71	5.71	6.89	0.84	2.18	7.56	5.55	2.02	2.69	8.07	13.28	7.39	1.51	1.34	6.05
ENSMUSG00000001039	ENSMUST00000102657	B9d1									65	69	615	54	137	48	7788	0	-4.623	-13.559	7	0	0	0	0	0	0	0	34.4828	4.9	4.41	2.45	5.39	0.98	3.92	6.37	9.31	0.98	2.94	6.37	4.41	2.45	5.39	8.33	6.86	6.86	1.96	4.41	11.27
ENSMUSG00000001052	ENSMUST00000001079	Sec24b	0.721375	0.282912	0.438463	0.817328	0.493461	0.323867	-0.114596	0.210549	239	77	3756	51	1133	38	78149	1.329	1.428	-13.994	24	0	1	3	1	0	0	0	29.52	7.99	3.92	3.68	4.24	1.6	3.44	6.55	5.52	2.64	2.48	10.15	3.12	2.4	2.88	10.71	12.63	5.52	0.4	4.32	5.84
ENSMUSG00000001053	ENSMUST00000001080	N4bp3	0.96149	0.570989	0.390501	0.962034	0.856051	0.105983	-0.284517	0.285062	195	65	1614	62	558	56	7780	0	-12.103	-8.777	5	0	0	0	0	0	0	3.43	46.8284	8.75	10.43	1.3	3.17	1.3	10.99	7.26	7.64	2.05	1.3	12.29	4.28	1.3	2.61	7.26	9.87	3.17	0.93	1.68	2.42
ENSMUSG00000001054	ENSMUST00000136020	Rmnd5b	0.872756	0.417152	0.455604	0.895775	0.50417	0.391606	-0.0639984	0.0870177	70	68	729	58	699	48	11977	0	-12.413	-13.27	9	0	0	0	0	0	0	0	43.1535	8.26	7.02	1.65	4.55	3.72	8.68	8.26	3.72	4.96	3.31	15.29	4.13	1.65	3.31	2.48	8.26	2.07	1.24	1.24	6.2
ENSMUSG00000001056	ENSMUST00000127405	Nhp2	0.755523	0.52774	0.227783	0.835444	0.423372	0.412072	0.184289	-0.104368	83	59	462	55	497	50	3980	1.228	-4.942	-6.168	4	0	0	0	0	0	0	4.48	45.3947	7.19	4.58	2.61	2.61	3.92	10.46	5.23	4.58	1.31	4.58	9.8	11.11	1.96	0.65	7.19	3.27	5.88	0	4.58	8.5
ENSMUSG00000001062	ENSMUST00000122363	Vps9d1	0.769772	0.485218	0.284554	0.768654	0.511502	0.257153	-0.0274011	0.0262834	262	77	1950	60	740	52	11993	0	-6.939	-41.53	15	0	0	1	0	0	0	0	42.284	10.79	6.93	1.69	3.54	2.77	8.47	4.62	4.01	1.69	2.93	14.64	4.62	1.69	1.54	8.78	9.24	4.93	0.46	2.62	4.01
ENSMUSG00000001065	ENSMUST00000001092	Zfp276	0.641432	0.0803737	0.561059	0.627379	0.374266	0.253112	-0.307946	0.293893	521	70	1845	59	1705	52	15551	0	-8.611	-9.501	11	0	0	1	0	0	0	0	43.3931	6.68	7.65	1.3	5.05	4.56	6.68	5.37	9.45	4.07	1.95	7.65	6.03	1.79	2.61	7	8.96	5.21	0.98	1.63	5.37
ENSMUSG00000001082	ENSMUST00000001109	Mfsd10	0.510423	0.00494353	0.505479	0.640691	0.437064	0.203627	-0.301852	0.432121	279	62	1371	58	257	53	3548	0	-9.002	-24.574	13	0	0	0	0	0	0	0	32.7473	10.75	5.7	0.88	1.75	0.88	2.85	2.85	9.21	1.75	4.17	16.89	2.19	3.07	7.02	6.14	8.77	5.04	1.75	2.41	5.92
ENSMUSG00000001089	ENSMUST00000105849	Luzp1	0.770549	0.726034	0.0445145	0.695181	0.663525	0.0316564	-0.0128581	-0.0625093	305	57	3207	47	3926	46	79559	0	2.68	-4.864	4	0	3	2	0	0	0	8.52	34.7704	5.9	7.3	5.06	4.87	0.94	11.33	3.93	5.06	2.43	3.84	8.52	9.18	1.4	1.59	4.78	12.17	5.62	0.37	1.03	4.68
ENSMUSG00000001095	ENSMUST00000001122	Slc13a2									50	60	1761	54	601	57	25131	0	-3.923	-18.777	12	0	0	2	0	0	0	0	32.8205	8.7	1.71	3.92	1.71	1.88	4.27	3.41	6.66	1.37	7	14.68	4.61	3.07	6.31	6.48	6.83	6.66	2.56	1.54	6.66
ENSMUSG00000001098	ENSMUST00000134532	Kctd10	0.898092	0.719465	0.178628	0.840751	0.488616	0.352135	0.173507	-0.230849	61	58	303	55	1655	53	16028	0	-4.736	-5.588	6	0	0	3	0	0	0	0	40.404	9	6	1	4	0	6	5	7	2	1	9	6	6	2	2	11	11	0	5	7
ENSMUSG00000001100	ENSMUST00000001127	Poldip2	0.907307	0.407892	0.499415	0.863676	0.449744	0.413932	-0.085483	0.0418523	119	84	1107	54	828	49	10544	0	-5.522	-31.096	11	0	0	0	2	0	0	0	34.8774	7.07	8.97	2.45	4.35	1.09	6.79	4.08	7.07	4.35	2.72	8.15	3.26	1.09	4.08	5.98	7.88	6.25	2.72	3.53	8.15
ENSMUSG00000001105	ENSMUST00000128788	Ift20	0.842211	0.612216	0.229995	0.707763	0.375677	0.332086	0.102091	-0.236539	447	55	399	46	295	41	5377	0.7	1.31	-11.965	6	0	2	0	0	0	0	16.44	40.458	9.09	3.79	3.03	5.3	1.52	13.64	11.36	4.55	0.76	6.82	11.36	11.36	1.52	4.55	0.76	0.76	2.27	0	1.52	6.06
ENSMUSG00000001119	ENSMUST00000001147	Col6a1									255	60	3078	57	767	49	17377	0	-8.607	-6.603	35	0	0	0	0	1	0	3.51	39.4531	6.83	5.56	3.02	7.12	1.95	6.63	4	15.32	1.46	4.68	6.63	5.46	1.27	3.22	8	5.17	3.9	0.39	2.73	6.63
ENSMUSG00000001120	ENSMUST00000001148	Pcbp3	0.371851	-0.143842	0.515693	0.375143	0.121605	0.253538	-0.262155	0.265447	264	61	1116	54	633	50	199932	1.381	-0.906	-15.588	16	0	0	1	0	0	0	4.67	39.7297	8.09	3.23	3.5	2.16	1.35	6.47	5.39	9.97	2.43	9.7	7.28	5.39	3.23	1.89	8.09	8.09	7.82	0.27	1.35	4.31
ENSMUSG00000001123	ENSMUST00000108269	Lgals9	0.917627	0.607373	0.310254	0.673166	0.399513	0.273653	-0.0366014	-0.20786	108	52	1062	51	416	49	21946	0.571	-1.199	-1.096	11	0	0	0	0	0	0	0	36.6477	4.53	4.53	6.52	1.7	1.98	3.68	8.78	7.08	3.68	5.67	5.38	3.97	3.12	8.22	7.93	5.67	6.23	0.85	2.83	7.65
ENSMUSG00000001127	ENSMUST00000120356	Araf	0.25876	-0.0507372	0.309498	0.490938	0.289859	0.201079	-0.108419	0.340597	102	56	561	54	857	33	4312	0.761	-6.829	9.919	6	0	0	2	0	0	0	0	35.6757	4.3	6.99	3.23	4.84	4.3	4.84	4.84	6.45	2.69	2.15	8.6	5.38	2.15	5.38	6.45	6.99	6.45	0.54	2.69	10.75
ENSMUSG00000001128	ENSMUST00000001156	Cfp	0.353573	0.10668	0.246892	0.186774	0.0844696	0.102304	-0.144588	-0.0222107	101	51	1395	57	140	44	6102	1.063	-10.503	-1.53	9	0	1	0	0	0	0	0	34.1253	6.25	5.6	2.59	2.59	9.48	5.6	6.47	10.56	2.37	1.51	6.47	4.31	1.51	1.08	10.56	8.62	4.74	4.31	1.08	4.31
ENSMUSG00000001131	ENSMUST00000115342	Timp1									164	57	618	52	101	41	4568	0	-3.899	-2.98	6	1	0	0	0	0	0	2.12	32.8431	9.27	5.85	3.41	2.44	5.85	3.41	3.41	5.85	2.44	4.39	10.73	4.88	2.93	4.39	5.85	10.24	5.85	1.46	3.41	3.9
ENSMUSG00000001134	ENSMUST00000123836	Uxt	0.88494	0.538294	0.346645	0.785733	0.583845	0.201888	-0.144757	0.0455502	93	61	474	49	308	40	10356	0.264	-3.439	-20.951	7	0	0	1	0	0	0	0	31.4103	3.82	6.37	3.18	7.01	0.64	7.64	5.1	3.82	3.18	3.82	15.29	5.1	3.18	4.46	3.82	6.37	5.73	0	3.82	7.64
ENSMUSG00000001138	ENSMUST00000001166	Cnnm3	0.718562	0.349511	0.369051	0.758243	0.560621	0.197622	-0.171429	0.21111	44	72	2142	65	3007	49	16371	0.852	-19.033	-21.096	8	0	0	3	0	0	0	0	49.1573	13.46	6.87	1.96	3.79	1.54	8.13	2.95	7.99	1.54	2.52	14.45	2.95	0.56	2.66	6.17	7.15	4.21	1.12	2.24	7.71
ENSMUSG00000001143	ENSMUST00000123583	Lman2l	0.186683	-0.146755	0.333438	0.630422	0.306457	0.323965	-0.00947315	0.453212	38	65	228	65	423	52	16880	0	-21.465	-9.501	6	0	0	0	0	0	0	0	43.2432	13.33	12	0	1.33	1.33	4	4	8	2.67	0	18.67	4	1.33	2.67	5.33	6.67	1.33	5.33	2.67	5.33
ENSMUSG00000001150	ENSMUST00000170795	Mcm3ap	0.399538	0.114886	0.284652	0.70272	0.390775	0.311945	0.0272926	0.275889	394	53	5916	53	117	32	46931	3.326	-4.213	6.73	29	2	1	0	0	0	0	8.63	36.2944	7.26	5.48	2.74	4.21	1.98	7.76	5.73	5.63	2.23	2.89	10.65	5.48	1.42	4.41	6.6	10.91	5.18	1.01	1.27	7.15
ENSMUSG00000001151	ENSMUST00000217838	Pcnt	0.472273	0.0124849	0.459789	0.632112	0.355646	0.276466	-0.183322	0.343161	168	68	8697	54	476	46	91524	6.265	-5.434	-14.864	42	0	4	0	0	0	0	0	44.1836	8.59	6.87	2.21	4.45	1.66	13.46	10.14	3.86	3.14	2.17	13.73	6.35	1.79	1.59	3.14	7.66	3.9	0.59	0.59	4.11
ENSMUSG00000001156	ENSMUST00000001184	Mxd1	0.913733	0.903649	0.0100834	0.901304	0.856135	0.0451689	0.0350854	-0.0475141	153	75	684	56	3829	47	22120	0.554	-4.61	-29.791	6	0	0	5	0	0	0	0	47.7876	6.17	9.69	2.64	9.25	0.88	8.37	3.08	6.17	3.52	1.32	11.89	7.93	2.64	0.44	1.76	11.45	3.96	0.44	2.2	6.17
ENSMUSG00000001157	ENSMUST00000113679	Gmcl1	0.742074	0.347534	0.39454	0.614366	0.16243	0.451936	0.0573964	-0.185104	76	75	600	52	284	39	13031	0	-7.931	-26.893	5	0	0	1	0	0	0	0	42.4242	7.04	6.53	2.51	6.53	4.02	8.04	4.02	8.54	1.51	5.53	9.05	5.03	2.51	3.52	5.03	10.05	3.52	1.01	3.52	2.51
ENSMUSG00000001158	ENSMUST00000001186	Snrnp27	0.944629	0.721865	0.222764	0.7586	0.25905	0.49955	0.276786	-0.462815	42	68	468	47	375	35	9372	0.184	1.852	-38.922	6	0	0	3	0	0	0	0	31.1688	2.58	25.16	3.23	4.52	0	10.97	1.94	4.52	1.29	3.23	2.58	9.03	3.23	2.58	3.87	13.55	3.87	0	1.94	1.94
ENSMUSG00000001166	ENSMUST00000117193	Oas1c	0.623525	0.441967	0.181558	0.767767	0.463247	0.304521	0.122963	0.0212799	362	50	1089	49	840	49	12321	0	-0.743	-7.907	7	0	1	0	0	0	0	17.71	34.903	6.08	5.8	4.14	4.7	3.31	9.39	6.63	2.21	2.21	2.76	11.05	6.35	1.66	6.35	4.42	5.8	4.7	2.21	4.7	5.52
ENSMUSG00000001173	ENSMUST00000001202	Ocrl	0.451198	0.351747	0.0994512	0.633904	0.545279	0.0886247	-0.0108265	0.193532	266	74	2703	44	2284	43	53482	0	2.498	-15.154	24	0	2	2	0	0	0	0	26.9188	3.78	6.22	5	5.89	2.44	8.11	5.33	4.33	2.56	5.67	10.78	6	2.56	5	5.78	6.33	4.22	1.22	2.78	6
ENSMUSG00000001175	ENSMUST00000110082	Calm1	0.88373	0.530015	0.353715	0.508693	0.280579	0.228114	-0.125601	-0.249435	279	68	450	46	3386	43	10380	2.756	3.179	2.528	6	0	0	10	0	0	0	0	27.7027	7.38	4.03	4.03	11.41	0	14.09	4.03	7.38	0.67	5.37	6.04	5.37	6.71	5.37	1.34	2.68	8.05	0	1.34	4.7
ENSMUSG00000001211	ENSMUST00000105387	Agpat3	0.33563	0.236216	0.0994133	0.510473	0.479541	0.0309317	-0.0684816	0.243325	109	63	1131	56	76	38	21784	2.331	-5.961	-7.038	9	0	0	0	0	0	0	0	40	5.59	5.32	2.39	2.93	3.19	6.38	2.93	6.91	2.13	4.79	14.36	6.12	1.86	6.65	3.72	4.79	6.12	3.19	3.72	6.91
ENSMUSG00000001227	ENSMUST00000167545	Sema6b									261	53	2661	62	234	65	10077	0	-11.714	-3.125	17	0	0	0	0	0	2	1.57	43.0508	8.47	7.67	2.6	4.4	2.37	4.63	2.48	9.48	2.71	2.03	10.27	2.37	1.35	4.18	9.82	8.58	5.3	1.58	1.81	7.9
ENSMUSG00000001228	ENSMUST00000001258	Uhrf1	0.662505	0.282914	0.379591	0.576886	0.114362	0.462523	0.0829326	-0.168552	253	59	2349	55	984	45	20166	1.676	-6.244	2.817	17	0	0	2	0	0	0	0	42.6376	5.63	7.42	4.09	6.27	3.2	7.03	4.48	7.16	2.17	2.69	7.54	7.42	1.66	2.56	5.63	7.67	4.99	1.66	3.58	7.16
ENSMUSG00000001229	ENSMUST00000038794	Dpp9	0.627394	0.035503	0.591891	0.663849	0.52943	0.134419	-0.457472	0.493927	233	72	2589	56	552	56	32073	0.368	-6.371	-6.893	21	0	0	1	0	0	0	6.84	42.2764	5.68	4.87	2.9	4.29	2.09	7.54	4.87	6.84	4.41	4.06	8.93	5.1	1.97	5.34	6.15	7.42	4.18	1.74	4.06	7.54
ENSMUSG00000001240	ENSMUST00000129680	Ramp2									424	69	570	56	184	47	2223	0.743	-4.97	-10.806	4	0	0	0	0	0	0	1.62	36.7021	7.41	3.7	4.23	5.29	3.7	5.82	3.7	3.7	2.65	4.23	15.87	3.17	2.12	2.65	8.47	8.99	3.7	2.12	2.65	5.82
ENSMUSG00000001247	ENSMUST00000108116	Lsr	0.839146	0.381305	0.457841	0.305472	0.784573	-0.479101	-0.936942	0.403268	254	65	1728	57	89	30	15651	0	-6.338	-30.226	9	0	1	0	0	0	0	0	38.676	8.35	9.74	2.61	7.13	3.65	5.57	3.65	6.09	2.09	2.96	6.61	2.09	1.39	2.09	10.09	9.04	4.17	1.39	4.87	6.43
ENSMUSG00000001248	ENSMUST00000001280	Gramd1a	0.877046	0.744495	0.132551	0.85115	0.674696	0.176453	0.043902	-0.0697987	179	78	2169	58	365	54	20956	2.644	-6.522	-17.472	19	0	0	1	0	0	0	0	41.7476	4.99	6.51	2.08	5.12	1.66	6.93	4.85	6.09	2.77	4.16	12.33	4.71	1.11	3.6	6.93	12.47	5.68	1.8	2.08	4.16
ENSMUSG00000001249	ENSMUST00000168884	Hpn	0.186944	-0.335097	0.522041	0.916095	0.822655	0.0934405	-0.4286	1.15775	201	66	1251	59	310	56	16558	0	-11.363	-3.009	13	0	0	0	0	0	0	3.45	39.2771	8.65	6.49	2.16	5.05	4.57	3.85	4.57	11.06	1.68	4.33	9.38	2.64	1.2	3.61	5.05	7.45	5.77	2.4	2.16	7.93
ENSMUSG00000001270	ENSMUST00000001304	Ckb	0.555806	0.352979	0.202826	0.522786	0.157575	0.365212	0.162385	-0.195405	124	70	1146	59	202	54	2978	0	-8.8	10.354	8	0	0	0	0	0	0	0	47.6316	5.51	5.51	4.2	7.87	1.31	6.82	3.94	8.4	3.67	3.94	10.76	5.25	2.89	4.46	5.25	6.04	4.72	1.05	2.36	6.04
ENSMUSG00000001280	ENSMUST00000163709	Sp1	0.859929	0.697565	0.162364	0.758282	0.623032	0.13525	-0.0271144	-0.0745327	83	72	1404	52	1647	39	26347	3.339	-1.672	5.571	6	0	0	1	0	0	0	0	33.0472	7.28	3.64	4.5	2.78	2.14	3.85	10.92	13.28	3.21	4.93	7.49	3.85	1.93	1.5	4.93	10.06	8.35	0.64	0.64	4.07
ENSMUSG00000001281	ENSMUST00000001327	Itgb7	0.627221	-0.0626341	0.689855	0.664055	0.0647535	0.599302	-0.0905534	0.127388	97	63	2421	57	165	52	15950	0.753	-9.557	-4.429	15	0	0	0	0	0	0	0	37.8882	6.82	6.2	2.85	5.71	6.82	6.45	5.71	9.55	2.85	2.73	10.05	2.61	0.62	3.23	5.21	8.19	4.71	0.87	2.11	6.7
ENSMUSG00000001285	ENSMUST00000113682	Myg1	0.469284	0.162534	0.306751	0.825633	0.568956	0.256677	-0.0500733	0.406422	32	56	1143	55	305	45	6431	0	-5.589	4.412	7	0	0	0	0	0	0	0	37.7309	8.95	7.63	3.42	4.47	1.84	7.11	5.53	6.58	3.68	3.16	10.53	3.16	2.11	3.42	6.84	5.53	5	1.84	2.63	6.58
ENSMUSG00000001288	ENSMUST00000063339	Rarg	0.833704	0.770065	0.0636393	0.817987	0.779152	0.0388348	-0.0248044	0.00908791	290	64	1344	56	1084	57	11561	0.757	-5.015	-5.588	8	0	0	2	0	0	0	0	44.1704	5.82	6.49	2.46	5.15	3.8	7.38	4.47	7.16	1.34	4.03	9.62	6.49	3.8	3.8	8.05	8.05	5.37	0.45	2.68	3.58
ENSMUSG00000001289	ENSMUST00000062492	Pfdn5	0.415575	0.191372	0.224203	0.277661	0.0863035	0.191358	-0.0328452	-0.105069	145	53	258	53	61	51	5263	0	-5.417	-2.835	5	0	0	0	0	0	0	0	47.619	11.76	1.18	0	5.88	0	7.06	9.41	4.71	3.53	4.71	7.06	12.94	7.06	3.53	2.35	1.18	5.88	0	3.53	8.24
ENSMUSG00000001300	ENSMUST00000001319	Efnb2	0.579956	0.435151	0.144805	0.459294	0.289647	0.169647	0.0248417	-0.145503	628	74	1011	48	3154	45	43809	0	-0.964	-26.603	5	0	1	5	0	0	1	0	31.6418	5.06	5.36	5.36	4.76	2.38	3.87	3.87	8.04	2.08	6.55	8.04	6.25	2.08	2.68	6.25	9.52	5.65	1.19	4.46	6.55
ENSMUSG00000001305	ENSMUST00000001339	Rrp15	0.909218	0.487963	0.421255	0.89631	0.419786	0.476524	0.0552696	-0.068177	50	56	846	50	425	42	28381	0.103	0.721	-9.067	5	0	0	2	0	0	0	0	41.7857	10.68	6.41	3.2	7.83	1.07	11.39	2.85	6.41	0.71	2.14	4.98	14.59	3.91	1.07	2.85	9.61	2.85	1.42	0	6.05
ENSMUSG00000001313	ENSMUST00000001347	Rnd2	0.337133	-0.8297	1.16683						163	83	684	56	547	51	3679	0	-8.678	-32.965	5	0	0	0	0	0	2	2.82	38.0531	6.17	9.25	2.64	6.61	3.08	6.17	4.41	7.05	1.76	2.64	8.37	5.29	2.2	2.64	3.52	9.25	5.73	0.88	3.08	9.25
ENSMUSG00000001323	ENSMUST00000065211	Srr	0.517689	0.524275	-0.00658644	0.649226	0.559814	0.089412	0.0959984	0.0355389	410	56	1020	47	2269	42	19440	0	0.412	-6.603	9	0	0	5	0	0	0	7.86	23.9645	9.73	2.36	4.13	4.13	2.06	5.6	5.31	7.08	2.06	7.96	8.55	5.6	1.18	2.06	6.49	5.9	6.19	0.88	2.65	10.03
ENSMUSG00000001334	ENSMUST00000102600	Fndc5	-0.0816506	0.00744448	-0.0890951	0.402558	0.894464	-0.491905	-0.40281	0.887019	80	85	630	58	2053	50	7595	0	-6.683	-22.4	6	0	0	1	0	0	0	0	46.6346	8.13	5.26	4.31	4.31	2.39	7.66	5.26	4.78	1.44	5.74	7.66	6.22	2.87	2.87	5.74	6.7	5.26	2.39	0.96	10.05
ENSMUSG00000001348	ENSMUST00000165735	Acp5	0.486964	0.172347	0.314617	0.700044	0.46813	0.231914	-0.0827029	0.295783	99	53	984	54	293	54	8985	1.131	-3.214	-16.603	5	0	0	0	0	0	0	0	38.0368	7.65	6.12	4.28	5.5	0.92	3.36	3.36	7.65	3.67	4.59	9.48	4.28	2.75	4.89	6.12	6.12	5.81	2.14	4.28	7.03
ENSMUSG00000001349	ENSMUST00000001384	Cnn1									88	64	894	53	1399	48	10363	0	-2.314	0.499	7	0	1	1	0	0	1	0	47.2973	6.06	4.71	7.74	3.37	1.01	6.73	6.73	9.43	3.7	4.38	7.74	7.41	3.37	3.03	4.71	5.05	6.06	0.67	4.04	4.04
ENSMUSG00000001366	ENSMUST00000001402	Fbxo9	0.778483	0.323867	0.454616	0.78469	0.175425	0.609265	0.154649	-0.148442	58	56	1314	50	478	36	27564	0	-2.319	-6.168	13	0	0	1	0	0	0	0	30.0459	7.09	8.47	1.37	5.26	2.06	8.7	5.26	5.03	2.97	3.89	9.15	4.58	3.2	4.58	4.35	7.09	5.03	1.6	4.58	5.72
ENSMUSG00000001376	ENSMUST00000001412	Vps50	0.620923	0.0659728	0.55495	0.570614	0.0394963	0.531118	-0.0238324	-0.0264766	141	55	2895	43	752	33	105150	0	3.866	8.325	28	0	2	1	0	0	0	5.83	27.7259	5.5	4.67	4.05	5.39	1.56	8.92	6.22	3.42	2.18	5.19	11.93	7.78	2.28	3.84	3.53	7.16	5.5	0.83	3.94	6.12
ENSMUSG00000001380	ENSMUST00000235863	Hars	0.923168	0.469996	0.453173	0.875989	0.51817	0.357819	-0.0953536	0.0481744	22	63	378	54	146	37	9560	0.403	-7.574	-13.414	5	0	0	0	0	0	0	0	35.4839	9.6	8	0	4	3.2	10.4	5.6	5.6	1.6	3.2	9.6	9.6	1.6	3.2	4	4.8	5.6	1.6	0.8	8
ENSMUSG00000001383	ENSMUST00000001419	Zmat2	0.869406	0.519964	0.349442	0.70049	0.278024	0.422465	0.0730232	-0.24194	66	53	600	47	1644	45	5791	4.111	5.701	-1.82	6	0	0	0	0	0	1	0	42.4242	3.52	7.54	3.02	7.54	1.51	13.57	3.02	5.53	1.51	2.01	6.03	17.09	4.02	3.52	1.51	5.03	4.52	0.5	3.52	5.53
ENSMUSG00000001403	ENSMUST00000088248	Ube2c	0.330736	-0.0506257	0.381362	0.215364	0.0766113	0.138753	-0.242609	0.127237	82	65	540	55	345	40	3010	0	-2.145	4.991	6	0	1	0	0	0	0	0	39.8876	9.5	3.35	4.47	5.59	1.68	4.47	4.47	7.26	1.68	4.47	10.06	6.7	1.68	2.79	7.26	7.82	5.59	1.68	4.47	5.03
ENSMUSG00000001415	ENSMUST00000001451	Smg5	0.629852	-0.0178693	0.647722	0.748503	0.341402	0.407101	-0.240621	0.359271	164	72	3054	53	1230	58	26079	4.315	-4.604	-40.516	22	0	1	0	0	0	0	3.43	37.7953	7.96	6.29	3.15	5.11	2.56	8.36	5.8	5.21	2.56	3.64	12.88	4.92	2.36	3.15	5.41	9.54	2.95	0.69	2.95	4.52
ENSMUSG00000001416	ENSMUST00000001452	Cct3	0.920109	0.397202	0.522907	0.786407	0.313401	0.473006	-0.0499014	-0.0838003	120	58	1638	48	219	46	24652	1.292	-1.145	-16.893	14	0	1	1	0	0	0	0	30.6985	7.16	6.61	3.67	5.87	1.83	7.89	4.4	6.42	1.83	8.99	8.44	6.42	4.04	0.92	3.3	5.69	6.79	0.73	1.65	7.34
ENSMUSG00000001418	ENSMUST00000131666	Glmp	0.645048	0.30791	0.337138	0.483554	0.333785	0.149769	-0.187369	0.0258748	10	60	213	57	247	55	1396	0	-10.103	16.875	4	0	0	0	0	0	0	0	34.7826	7.14	8.57	0	0	4.29	8.57	4.29	12.86	1.43	2.86	12.86	2.86	1.43	2.86	11.43	4.29	5.71	5.71	0	2.86
ENSMUSG00000001419	ENSMUST00000119251	Mef2d	0.724847	0.561138	0.163708	0.832197	0.795589	0.0366073	-0.127101	0.234451	390	68	1521	59	1577	51	27515	4.791	-4.66	-4.139	10	0	0	0	0	0	0	0	43.1683	7.11	5.14	4.35	3.75	0.79	4.35	6.72	7.11	1.98	2.57	9.88	3.56	1.78	2.37	13.83	11.46	5.34	0.4	1.98	5.53
ENSMUSG00000001420	ENSMUST00000001456	Tmem79	1	1	0						166	55	1176	59	1064	52	5850	0	-9.381	1.078	4	0	0	0	0	0	0	5.43	38.4615	7.42	7.42	1.02	3.58	1.79	8.95	2.05	7.16	1.28	3.07	13.3	2.05	1.53	5.12	11	7.42	4.86	1.53	3.32	6.14
ENSMUSG00000001424	ENSMUST00000001460	Snd1	0.185936	-0.0743307	0.260266	0.144813	0.112617	0.0321963	-0.22807	0.186947	217	66	2733	54	532	49	408485	3.675	-5.691	-4.864	24	0	1	1	0	0	0	0	40.8141	8.68	7.36	3.74	4.84	1.32	8.9	3.96	6.37	2.31	4.95	8.57	6.26	1.54	3.74	5.27	5.93	4.84	0.88	2.86	7.69
ENSMUSG00000001435	ENSMUST00000105409	Col18a1	0.628516	0.551445	0.0770708	0.801828	0.544939	0.256889	0.179818	-0.0065063	29	72	4584	60	178	45	60690	0	-11.831	-1.386	41	0	0	1	0	0	0	0	36.8938	6.61	4.52	1.51	4.85	0.52	5.7	4.52	17.16	1.51	2.75	7.01	3.67	1.05	3.34	16.24	7.73	3.86	0.92	1.38	5.17
ENSMUSG00000001436	ENSMUST00000144234	Slc19a1	0.666692	-0.178988	0.84568	0.651888	0.509054	0.142834	-0.702846	0.688042	144	61	1539	56	626	53	17749	0	-5.959	-18.777	6	0	0	0	0	0	0	0	33.0724	7.03	6.64	1.37	3.52	2.73	3.71	5.08	5.08	1.56	4.69	14.84	2.54	2.54	6.45	4.1	8.79	5.08	1.95	4.1	8.2
ENSMUSG00000001440	ENSMUST00000001479	Kpnb1	0.761691	0.396627	0.365064	0.572222	0.30897	0.263252	-0.101812	-0.0876565	296	74	2631	48	2967	43	28168	2.235	0.033	-1.241	22	0	1	5	0	0	0	2.02	29.8286	9.7	3.65	4.34	5.94	2.51	8.22	6.16	4.34	1.48	5.48	11.64	4.91	2.74	2.74	4.22	5.82	5.02	0.91	2.51	7.65
ENSMUSG00000001441	ENSMUST00000172108	Npepps	0.372291	0.0896179	0.282673	0.588219	0.245532	0.342687	0.0600137	0.155914	112	85	2670	46	142	28	74729	1.124	1.122	-22.255	22	0	4	0	0	0	0	0	26.3514	7.65	4.84	3.26	5.85	1.35	6.86	3.37	5.96	2.02	4.61	11.14	6.07	2.25	4.84	5.96	6.3	5.06	2.02	3.26	7.31
ENSMUSG00000001444	ENSMUST00000001484	Tbx21	0.891637	0.793673	0.0979642	0.91142	0.85846	0.0529604	-0.0450038	0.0647869	194	68	1593	60	701	51	17261	0	-9.239	-20.226	6	0	0	1	0	0	0	0	46.1248	6.98	4.91	3.4	4.34	0.75	5.47	5.09	10.19	2.26	1.89	6.6	3.02	2.83	4.91	13.21	8.49	4.53	1.51	4.34	5.28
ENSMUSG00000001445	ENSMUST00000001485	Mrpl10	0.83948	0.414939	0.42454	0.79639	0.520659	0.275731	-0.14881	0.10572	41	65	789	57	878	47	7654	0	-6.919	-22.255	5	0	0	0	0	0	0	0	39.4636	7.25	6.49	3.05	4.2	1.53	4.2	6.49	4.96	3.44	3.44	15.27	6.49	2.29	2.67	9.54	4.2	3.44	0.76	1.91	8.4
ENSMUSG00000001467	ENSMUST00000001507	Cyp51	0.926329	0.723816	0.202513	0.842327	0.72104	0.121287	-0.0812262	-0.00277597	439	67	1512	45	1980	40	23602	0	0.277	-16.748	10	0	2	3	0	0	0	0	23.9044	7.55	4.97	3.58	3.98	1.39	6.16	3.98	6.96	2.39	5.57	12.13	6.16	2.39	4.97	5.96	5.37	5.77	1.39	4.37	4.97
ENSMUSG00000001472	ENSMUST00000211932	Tcf25	0.380161	0.0815679	0.298593	0.577237	0.374464	0.202773	-0.0958204	0.292896	17	64	1881	54	3104	52	29955	0	-3.702	2.383	17	0	0	1	0	0	0	0	37.76	6.39	7.99	3.67	5.11	1.92	8.15	4.63	5.75	2.88	2.72	12.62	4.79	1.76	3.83	6.71	8.15	3.83	0.8	3.19	5.11
ENSMUSG00000001473	ENSMUST00000001513	Tubb6	1	-1.92752	2.92752	0.751822	0.788927	-0.0371052	-2.96463	2.71645	41	80	1344	58	373	46	12033	0	-6.595	-14.574	4	0	0	0	0	0	0	0	47.9821	6.49	4.7	4.92	5.82	1.79	8.05	4.92	7.61	2.24	4.25	7.38	3.58	4.25	5.37	4.47	6.49	6.49	0.89	3.36	6.94
ENSMUSG00000001482	ENSMUST00000065534	Def8	0.805112	0.457704	0.347408	0.777908	0.701542	0.0763656	-0.271043	0.243838	76	60	1347	56	1704	52	20285	0	-5.558	-3.27	12	0	0	1	0	0	0	2.67	43.1767	4.24	6.92	3.13	5.58	6.03	9.38	5.36	2.9	4.02	4.02	11.61	5.8	2.23	3.57	4.91	6.47	3.57	0.89	3.57	5.8
ENSMUSG00000001497	ENSMUST00000153250	Pax9	0.733688	0.84998	-0.116292	0.595657	0.788927	-0.19327	-0.0769782	-0.0610523	403	58	1029	61	2800	38	20941	0	-9.02	-12.11	5	0	1	6	0	0	0	0	44.868	10.82	5.26	3.8	2.92	1.17	3.22	4.39	8.48	3.51	5.85	6.43	3.51	1.17	1.75	10.53	10.82	4.09	1.17	4.09	7.02
ENSMUSG00000001506	ENSMUST00000001547	Col1a1									145	61	4362	62	1423	46	16819	0	-9.447	-10.661	51	0	0	2	0	0	1	4.54	31.8871	8.95	4.75	2.34	4.13	1.24	5.23	3.3	26.77	0.62	1.72	3.51	3.79	0.96	1.79	19	4.61	3.03	0.41	0.96	2.89
ENSMUSG00000001507	ENSMUST00000001548	Itga3	0.857917	0.37748	0.480438	0.866526	0.728229	0.138297	-0.34214	0.350749	378	62	3162	57	1321	55	32241	0	-6.935	-17.617	26	0	1	1	0	0	0	0	40.8745	7.31	6.08	4.46	5.6	1.99	4.84	5.03	7.79	2.18	3.51	12.73	3.32	2.18	3.23	5.51	6.74	5.7	1.52	3.42	6.84
ENSMUSG00000001517	ENSMUST00000073316	Foxm1	0.925037	0.863319	0.0617173	0.836612	0.711157	0.125455	0.0637374	-0.152162	198	74	2274	55	2180	50	13180	0	-3.518	-3.414	8	0	0	2	0	0	0	0	40.0794	5.42	5.42	3.17	3.3	1.32	8.72	3.96	5.15	2.11	4.49	10.04	6.21	1.59	2.64	12.95	12.15	4.49	1.19	1.06	4.62
ENSMUSG00000001518	ENSMUST00000142615	Itfg2	0.594423	0.0999769	0.494446	0.523891	0.276469	0.247422	-0.247025	0.176492	105	67	1077	55	2009	50	15386	0	-8.517	-5.154	10	0	0	3	0	0	0	0	36.4146	7.26	3.91	4.47	6.98	3.07	5.87	3.91	9.5	3.35	2.79	10.89	3.91	1.96	2.51	3.91	5.87	5.59	1.96	1.68	10.61
ENSMUSG00000001521	ENSMUST00000001562	Tulp3	0.0876889	0.169662	-0.081973	0.508935	0.533658	-0.024723	0.05725	0.363996	73	71	1383	54	1918	50	34691	0	-5.076	-23.443	11	0	1	4	0	0	0	0	42.9194	7.61	6.3	4.57	6.09	1.09	8.91	4.57	6.96	2.39	3.04	9.13	6.96	2.39	3.04	6.74	7.39	4.13	0.43	2.61	5.65
ENSMUSG00000001524	ENSMUST00000160734	Gtf2h4	0.669621	0.147073	0.522548	0.828865	0.511151	0.317714	-0.204835	0.364078	88	60	1392	57	89	46	5878	0	-10.04	-18.052	14	0	0	0	0	0	0	1.5	38.7446	7.34	6.7	2.59	3.24	0.65	5.62	6.91	6.91	2.59	3.46	14.9	3.46	2.59	5.18	4.97	7.34	4.54	1.73	2.59	6.7
ENSMUSG00000001525	ENSMUST00000001566	Tubb5	0.529408	0.699982	-0.170574	0.392996	0.611361	-0.218365	-0.0477911	-0.088621	253	56	1335	55	1061	44	4386	1.763	-4.125	13.397	4	0	0	2	0	0	0	0	41.535	6.76	4.95	4.73	5.86	1.8	8.11	4.73	7.88	2.25	4.05	7.21	3.38	3.83	5.18	4.5	5.86	6.98	0.9	3.6	7.43
ENSMUSG00000001542	ENSMUST00000220572	Ell2	0.838742	0.619917	0.218825	0.590532	0.467466	0.123066	-0.0957595	-0.152451	66	74	273	57	247	44	54358	0	-13.152	-37.762	4	0	1	2	0	0	0	0	43.8202	7.78	8.89	2.22	1.11	3.33	5.56	8.89	12.22	2.22	4.44	12.22	7.78	1.11	3.33	4.44	3.33	5.56	0	2.22	3.33
ENSMUSG00000001552	ENSMUST00000001592	Jup	0.88574	0.453202	0.432538	0.787453	0.603037	0.184416	-0.248123	0.149835	122	75	2238	59	845	54	27131	0.744	-6.72	-0.951	14	0	0	0	0	0	0	0	45.0269	9.66	4.7	5.37	5.5	1.74	5.37	5.37	4.97	2.42	4.56	12.62	4.3	3.36	0.94	5.23	6.31	6.71	0.67	2.95	7.25
ENSMUSG00000001555	ENSMUST00000001595	Fkbp10									87	69	1746	56	751	55	9128	0	-7.385	-13.125	10	0	0	0	0	0	0	0	40	3.96	6.37	3.61	7.06	1.55	5.85	3.61	10.5	2.93	5.34	10.5	3.27	2.58	3.61	6.37	5.68	4.82	0.52	4.65	7.23
ENSMUSG00000001558	ENSMUST00000001599	Klhl10									114	58	1827	49	76	23	15106	0	-0.756	-19.936	5	0	0	1	0	0	0	2.92	35.2554	7.73	5.1	6.41	4.93	2.96	7.24	1.64	5.92	2.14	5.59	6.74	4.77	3.45	5.1	4.11	6.25	5.59	1.48	5.43	7.4
ENSMUSG00000001569	ENSMUST00000001611	Nom1	0.775705	0.539164	0.236541	0.752	0.560085	0.191916	-0.0446253	0.0209206	14	63	2565	51	6640	44	23180	1.381	-3.546	6.73	11	0	0	4	0	0	2	0	38.687	7.61	7.96	3.4	5.15	1.29	9.13	3.28	6.91	2.58	3.63	11.83	7.96	2.69	3.4	3.63	7.26	4.8	0.82	1.29	5.39
ENSMUSG00000001576	ENSMUST00000167070	Ergic1	0.274797	0.108262	0.166534	0.413014	0.378779	0.0342348	-0.1323	0.270517	453	52	576	51	324	54	54026	0	2.628	-5.299	11	0	0	0	0	0	0	0	38.4211	5.76	5.24	5.76	4.71	1.05	2.62	4.19	8.38	5.76	5.76	5.76	5.24	1.57	4.19	5.76	6.81	8.38	0.52	6.28	6.28
ENSMUSG00000001588	ENSMUST00000001631	Acap1	0.693542	0.389184	0.304358	0.690141	0.401415	0.288726	-0.0156316	0.0122312	201	57	2223	55	58	54	13973	2.707	-6.251	-5.588	22	0	1	0	0	0	0	0	36.6712	10	7.57	3.11	4.46	2.57	7.84	5	7.43	3.24	2.97	11.49	4.73	1.76	3.11	5	6.49	4.46	1.08	1.49	6.22
ENSMUSG00000001604	ENSMUST00000102533	Tcea3									97	71	1044	53	110	42	26947	0	-1.921	-2.69	11	0	0	0	0	0	0	0	43.3526	6.05	8.07	4.32	4.9	3.75	8.36	2.31	5.19	0.86	2.88	9.51	10.95	2.88	1.15	4.9	9.51	7.2	0.86	1.44	4.9
ENSMUSG00000001622	ENSMUST00000001667	Csn3									105	44	546	45	340	36	7087	0	7.406	8.18	5	1	0	0	0	0	0	0	18.8889	7.73	3.87	8.84	2.76	0.55	4.42	3.31	1.1	0.55	6.63	7.18	1.1	3.31	2.76	13.26	8.29	8.84	0.55	5.52	9.39
ENSMUSG00000001627	ENSMUST00000001672	Ifrd1	0.855408	0.722387	0.133021	0.903943	0.705608	0.198335	0.065314	-0.0167788	233	65	1350	45	1795	40	21623	0.575	-0.063	-5.154	12	0	1	4	0	0	0	3.17	25.8929	8.46	5.79	2.67	6.24	2.9	7.8	2.45	6.46	2.23	4.01	10.69	8.02	2.45	4.68	3.34	7.35	7.13	0.45	2.23	4.68
ENSMUSG00000001630	ENSMUST00000111644	Stk38l	0.830931	0.738337	0.0925947	0.789291	0.697408	0.0918829	-0.000711756	-0.0409281	23	55	1416	45	835	46	51521	0	2.249	14.412	14	0	0	0	0	0	0	0	29.5745	5.73	6.37	3.4	5.94	0.85	8.92	2.97	5.73	2.55	5.1	9.34	7.86	3.61	5.94	4.46	4.46	7.01	1.49	3.18	5.1
ENSMUSG00000001632	ENSMUST00000113117	Brpf1	0.876954	0.651775	0.225179	0.840678	0.763811	0.0768671	-0.148312	0.112036	124	66	3741	54	675	47	17618	1.303	-3.3	5.716	13	0	0	2	0	0	0	0	41.5261	6.02	7.46	3.53	5.62	2.41	8.51	4.65	5.7	3.37	3.29	7.62	7.22	2.17	2.41	7.62	9.15	4.25	1.04	2.73	5.22
ENSMUSG00000001642	ENSMUST00000102980	Akr1b3	0.731812	0.261014	0.470797	0.457547	0.175992	0.281555	-0.189242	-0.0850223	73	61	951	53	363	47	13545	0.806	-3.417	-9.501	10	1	0	0	0	0	0	0	41.2698	6.33	3.16	4.11	6.01	1.9	5.7	4.43	4.75	2.53	5.38	10.13	8.23	1.9	3.48	6.96	5.38	5.38	1.9	3.8	8.54
ENSMUSG00000001655	ENSMUST00000001700	Hoxc13									85	52	987	65	1389	44	7712	0	-15.239	-12.835	2	0	0	2	0	0	0	0	54.4343	9.15	5.18	1.52	3.35	2.13	4.88	3.96	10.67	3.35	1.83	7.01	5.79	1.22	2.13	10.98	11.28	3.35	1.52	5.18	5.49
ENSMUSG00000001657	ENSMUST00000001703	Hoxc8									173	74	729	54	966	42	3215	0	-4.628	-14.139	2	0	0	1	0	0	0	0	43.9834	4.96	6.2	5.37	2.89	1.65	10.74	6.2	8.26	4.13	1.24	6.2	6.61	1.65	4.55	5.79	10.74	2.48	1.24	5.37	3.72
ENSMUSG00000001663	ENSMUST00000001713	Gstt1									88	53	723	55	226	48	14772	0	-7	-2.98	5	0	1	0	0	0	0	0	35.9833	9.58	5.42	1.67	5.83	2.08	5.83	4.58	4.58	4.17	4.58	13.75	5.83	3.75	4.17	6.67	2.08	2.5	1.67	2.92	8.33
ENSMUSG00000001665	ENSMUST00000174187	Gstt3	1	0.159506	0.840494	1	0.569146	0.430854	-0.40964	0.40964	92	68	360	54	196	55	4297	0	-5.565	-6.748	3	0	0	0	0	0	0	0	34.7458	6.72	5.04	3.36	2.52	5.04	5.04	5.04	7.56	0.84	5.04	11.76	6.72	1.68	4.2	6.72	8.4	4.2	1.68	1.68	6.72
ENSMUSG00000001666	ENSMUST00000172820	Ddt	0.681131	0.408374	0.272757	0.632936	0.270351	0.362584	0.0898273	-0.138022	148	59	222	54	204	48	1805	0	-7.233	2.672	2	1	0	0	0	0	0	0	40.2778	5.48	4.11	2.74	2.74	1.37	6.85	4.11	5.48	2.74	5.48	12.33	5.48	4.11	8.22	2.74	8.22	9.59	1.37	0	6.85
ENSMUSG00000001674	ENSMUST00000001724	Ddx18	0.910088	0.564219	0.34587	0.866275	0.542089	0.324186	-0.0216841	-0.0221294	114	65	1983	47	161	35	14155	0.58	1.185	-16.893	13	0	0	0	0	0	0	0	32.4734	5.91	5	4.09	5.3	0.91	6.67	4.55	6.67	2.12	4.55	11.21	11.36	2.27	4.24	5	6.36	5	0.3	2.27	6.21
ENSMUSG00000001687	ENSMUST00000164904	Ubl3	0.871485	0.576551	0.294934	0.528788	0.502632	0.0261557	-0.268778	-0.0739191	654	66	354	48	993	48	47648	0.575	1.547	-0.226	7	1	1	1	0	0	0	10.69	32.7586	4.27	5.13	6.84	4.27	1.71	6.84	3.42	5.98	3.42	5.13	11.11	5.13	3.42	3.42	5.98	8.55	5.13	1.71	1.71	6.84
ENSMUSG00000001700	ENSMUST00000070166	Gramd3	0.714089	0.770048	-0.055959	0.795467	0.841152	-0.0456851	0.0102739	0.0711042	143	73	1299	48	1163	44	71661	1.505	1.814	-26.458	14	0	0	2	0	0	0	2.11	31.7865	5.32	4.86	4.17	5.09	1.62	7.41	4.4	4.86	2.78	5.09	9.49	7.87	1.39	3.24	4.86	12.27	7.41	0.46	1.85	5.56
ENSMUSG00000001707	ENSMUST00000001757	Eef1e1	0.977114	0.816471	0.160643	0.912522	0.551058	0.361464	0.200821	-0.265414	65	62	525	49	1963	41	14852	0.599	0.058	-27.907	4	0	0	6	0	0	0	0	34.6821	6.9	4.6	4.6	4.02	0.57	6.32	5.75	5.17	5.17	5.17	14.37	6.9	1.72	2.3	2.3	7.47	5.17	1.15	4.6	5.75
ENSMUSG00000001729	ENSMUST00000001780	Akt1	0.511098	0.321263	0.189834	0.469758	0.457366	0.0123913	-0.177443	0.136103	370	79	1443	56	877	54	20456	0.907	-4.873	-1.241	14	0	0	2	0	0	0	2.62	47.8079	5.21	6.46	3.13	6.04	1.46	10	3.54	6.04	2.5	4.17	8.54	7.08	3.33	5.63	4.58	4.79	6.46	1.46	3.75	5.83
ENSMUSG00000001739	ENSMUST00000111093	Cldn15	1	1	0						276	61	684	57	942	49	9243	0	-8.383	-15.733	6	0	0	0	0	0	0	1.97	35.3982	8.81	2.2	4.41	2.64	3.96	2.64	0.44	10.13	0.88	5.29	13.22	3.52	3.52	4.85	3.08	9.69	7.49	2.2	4.41	6.61
ENSMUSG00000001741	ENSMUST00000001792	Il16	0.974431	0.839703	0.134728	0.955208	0.88326	0.0719488	-0.0627793	0.0435566	227	54	3969	54	1064	49	92699	0.195	-3.708	-10.661	19	1	3	0	0	0	0	2.02	35.2006	7.19	5.45	2.27	4.16	2.19	6.96	4.99	8.02	2.27	3.86	8.93	5.98	1.36	2.65	8.32	13.39	6.2	0.38	1.13	4.31
ENSMUSG00000001750	ENSMUST00000001801	Tcirg1	0.632088	0.0257476	0.60634	0.62419	0.41819	0.206	-0.40034	0.392442	119	62	2505	58	64	55	11084	0	-8.928	-6.893	20	0	0	0	0	0	0	0	38.5354	8.03	5.4	3	2.88	1.44	6.35	5.76	6.47	3.24	4.08	12.95	1.92	2.4	6.47	5.28	6.59	5.88	1.68	2.4	7.79
ENSMUSG00000001751	ENSMUST00000001802	Naglu	0.840128	0.421449	0.41868	0.856313	0.322088	0.534224	0.115545	-0.0993606	113	70	2220	59	227	49	7661	0	-11.407	-17.762	6	0	0	0	0	0	0	1.55	39.7019	10.01	5.55	3.38	4.33	1.35	4.74	4.74	7.85	2.71	2.57	12.86	2.3	1.89	4.74	6.22	6.09	4.19	3.38	4.06	7.04
ENSMUSG00000001755	ENSMUST00000001806	Coasy	0.925449	0.603123	0.322327	0.946312	0.635043	0.311269	-0.0110578	0.0319202	137	64	1692	56	309	48	4055	0	-8.091	-21.675	10	0	0	0	0	0	0	2.53	39.6797	7.64	5.33	3.37	3.91	0.71	6.04	6.04	6.39	2.84	3.37	14.03	4.09	1.42	2.31	6.75	7.28	5.51	0.89	3.02	9.06
ENSMUSG00000001761	ENSMUST00000001812	Smo	0.628254	0.219304	0.40895	0.623392	0.587376	0.0360158	-0.372934	0.368073	317	68	2382	59	1080	48	25672	0	-10.114	-33.27	12	0	0	0	0	0	0	3.81	42.4242	8.95	6.43	3.15	3.4	3.28	5.04	3.15	7.57	2.4	4.04	10.21	3.78	1.89	4.79	7.57	6.94	5.42	2.4	2.27	7.31
ENSMUSG00000001763	ENSMUST00000046750	Tspan33	1	0.26812	0.73188						221	82	852	54	921	54	24338	0	-5.734	-30.371	8	0	0	0	0	0	0	0	31.9149	7.42	3.53	5.3	4.59	4.59	2.47	5.3	6.71	1.41	7.07	13.78	3.53	3.18	5.65	3.53	6.01	2.12	1.41	3.89	8.48
ENSMUSG00000001767	ENSMUST00000001818	Crnkl1	0.917453	0.545258	0.372195	0.872991	0.482539	0.390451	0.0182562	-0.0627185	410	59	2073	44	945	36	17536	0.876	4.264	-19.936	14	0	2	3	0	0	0	4.76	30.9144	8.26	8.55	3.91	4.64	0.72	13.19	5.07	2.32	1.59	5.51	7.39	8.84	1.88	4.78	3.33	3.62	3.19	2.75	5.51	4.93
ENSMUSG00000001768	ENSMUST00000094480	Rin2	0.868247	0.799457	0.0687893	0.856086	0.700981	0.155104	0.0863151	-0.0984758	387	52	2577	53	1693	39	101501	0	-2.991	1.078	13	0	2	4	0	0	0	0	40.6068	5.13	5.59	2.8	4.9	2.21	7.58	4.43	4.78	2.33	3.85	11.42	6.41	2.91	3.85	8.39	9.67	6.06	0.58	2.91	4.2
ENSMUSG00000001774	ENSMUST00000216800	Chordc1	0.874281	0.412695	0.461586	0.745859	0.250363	0.495497	0.0339111	-0.162332	49	54	342	46	142	39	17510	0.769	3.186	-2.835	7	0	0	0	0	0	0	0	31.25	5.31	7.96	2.65	5.31	5.31	7.96	3.54	5.31	3.54	3.54	5.31	10.62	0.88	4.42	9.73	5.31	5.31	0.88	1.77	5.31
ENSMUSG00000001783	ENSMUST00000001834	Rtcb	0.703447	0.278271	0.425176	0.744173	0.156803	0.58737	0.162194	-0.121467	116	69	1518	49	375	49	19187	0.8	-0.635	-1.53	12	0	1	0	0	0	0	0	32.3413	9.31	5.15	4.75	6.34	1.78	5.54	3.76	9.7	3.17	5.15	7.52	6.34	3.96	3.17	4.16	4.16	3.96	0.79	2.57	8.71
ENSMUSG00000001785	ENSMUST00000001836	Pwp1	0.895157	0.288345	0.606812	0.80008	0.257642	0.542438	-0.0643734	-0.0307035	112	65	1506	49	954	39	17266	0	-1.048	-2.69	15	0	0	0	0	0	0	0	30.4	5.59	4.39	3.99	8.98	2	7.78	3.99	6.99	2.4	3.59	8.78	5.39	1.2	3.19	4.79	9.78	5.19	1.8	2.59	7.58
ENSMUSG00000001786	ENSMUST00000120344	Fbxo7	0.840811	0.434453	0.406358	0.807559	0.501941	0.305618	-0.100739	0.0674875	105	72	1335	50	215	44	26135	0.62	0.306	-34.139	9	0	0	0	0	0	0	0	25.9594	6.31	5.41	2.93	5.86	1.58	5.18	4.5	6.98	2.48	4.5	12.39	3.83	2.03	3.38	11.04	7.21	4.28	0.9	2.7	6.53
ENSMUSG00000001794	ENSMUST00000001845	Capns1	0.516983	0.184554	0.332429	0.38076	0.200238	0.180522	-0.151907	0.0156834	228	63	807	54	565	56	11870	1.12	-14.351	-4.139	12	0	0	0	0	2	0	2.93	36.3296	6.72	4.48	5.22	5.22	0.75	5.6	2.99	18.28	1.87	5.6	8.58	4.1	4.1	5.22	2.61	6.34	4.1	1.12	2.61	4.48
ENSMUSG00000001827	ENSMUST00000106983	Folr1									406	53	768	54	133	52	12458	0	-6.734	0.064	7	0	1	0	0	0	0	2.43	38.189	5.88	3.92	5.1	3.92	7.06	6.27	5.1	4.71	4.71	2.75	8.24	4.31	3.14	3.53	4.71	9.8	5.1	5.49	2.75	3.53
ENSMUSG00000001829	ENSMUST00000001884	Clpb	0.269122	-0.143615	0.412737	0.41662	0.0497934	0.366827	-0.0459099	0.193408	178	57	2034	54	2415	48	126536	0.903	-6.104	-8.922	16	0	0	1	0	0	0	0	39.2012	8.86	7.68	4.14	5.17	1.03	8.12	3.84	6.94	2.95	4.73	10.19	6.5	2.22	2.95	4.58	5.61	4.58	1.18	2.36	6.35
ENSMUSG00000001829	ENSMUST00000001884	Clpb	0.269122	-0.143615	0.412737	0.41662	0.0497934	0.366827	-0.0459099	0.193408	178	57	2034	54	2415	48	126536	0.903	-6.104	-8.922	16	0	0	1	0	0	0	0	39.2012	8.86	7.68	4.14	5.17	1.03	8.12	3.84	6.94	2.95	4.73	10.19	6.5	2.22	2.95	4.58	5.61	4.58	1.18	2.36	6.35
ENSMUSG00000001829	ENSMUST00000106998	Clpb	0.269122	-0.143615	0.412737	0.41662	0.0497934	0.366827	-0.0459099	0.193408	106	62	2124	55	57	52	124106	0.903	-6.046	-8.922	17	0	0	0	0	0	0	2.93	39.0935	8.77	7.92	4.1	5.23	1.13	7.92	3.96	7.07	2.83	4.53	10.04	6.22	2.26	2.97	4.53	5.66	4.67	1.56	2.26	6.36
ENSMUSG00000001829	ENSMUST00000106998	Clpb	0.269122	-0.143615	0.412737	0.41662	0.0497934	0.366827	-0.0459099	0.193408	106	62	2124	55	57	52	124106	0.903	-6.046	-8.922	17	0	0	0	0	0	0	2.93	39.0935	8.77	7.92	4.1	5.23	1.13	7.92	3.96	7.07	2.83	4.53	10.04	6.22	2.26	2.97	4.53	5.66	4.67	1.56	2.26	6.36
ENSMUSG00000001833	ENSMUST00000165594	2024-09-07	0.71496	0.373404	0.341556	0.458599	0.130802	0.327796	-0.0137592	-0.242602	188	74	1314	39	1014	30	56116	0.433	8.102	-39.501	14	0	1	6	0	0	0	0	22.9358	4.81	5.95	6.18	4.12	1.37	10.98	5.95	5.03	2.29	5.03	7.78	10.53	3.43	3.2	3.66	4.81	3.89	0.69	2.75	7.55
ENSMUSG00000001844	ENSMUST00000161915	Zdhhc4	0.684045	0.290807	0.393238	0.425697	0.330116	0.0955804	-0.297658	0.0393098	139	54	1032	52	45	44	9858	0	-0.646	9.484	6	0	2	0	0	0	0	3.56	30.9942	7.58	5.25	3.21	3.21	4.66	2.92	4.08	3.21	3.79	4.37	15.74	3.5	0.87	7.58	4.08	4.37	6.71	2.04	4.37	8.45
ENSMUSG00000001847	ENSMUST00000100489	Rac1	0.835658	0.722613	0.113046	0.841558	0.61877	0.222788	0.109743	-0.103842	196	77	636	49	1493	41	22512	0.75	-1.611	-26.603	7	0	0	1	0	0	0	0	30	6.64	5.21	2.84	7.11	3.79	4.27	2.37	6.64	0.95	5.21	9.95	9.48	1.42	2.84	7.58	3.79	6.64	0.95	3.79	8.53
ENSMUSG00000001855	ENSMUST00000065398	Nup214	0.579528	0.228914	0.350614	0.661208	0.356107	0.3051	-0.0455134	0.127193	128	66	6258	53	219	44	77936	0	-2.34	-0.516	36	0	2	0	0	0	0	0	30.2783	10.84	2.35	2.88	2.64	0.82	4.22	4.36	8.78	1.29	1.87	6.57	4.27	1.34	5.37	9.88	16.16	8.78	0.48	0.96	6.14
ENSMUSG00000001864	ENSMUST00000001920	Aif1l									212	71	453	52	2452	49	23304	0	-3.702	-3.704	6	0	0	6	0	0	0	0	41.6107	6	5.33	4.67	4.67	0.67	11.33	2	6.67	0.67	3.33	10.67	10.67	7.33	4.67	5.33	7.33	2	0	2	4.67
ENSMUSG00000001865	ENSMUST00000001921	Cpa3	1	0.75604	0.24396						10	20	1254	40	185	40	26562	0	6.425	17.31	11	0	2	1	0	0	0	0	23.5577	5.04	5.04	4.8	5.76	1.2	5.76	3.12	3.6	3.12	7.91	7.67	8.87	2.64	4.8	3.84	7.43	6.47	2.4	5.04	5.52
ENSMUSG00000001870	ENSMUST00000112514	Ltbp1	0.699622	0.525446	0.174176	0.00728848	1	-0.992712	-1.16689	0.474554	71	23	4026	51	773	36	212416	0	-2.568	15.136	30	0	1	1	0	0	0	0	32.4627	3.8	3.43	5	5.52	10.37	7.53	6.49	8.5	2.76	3.13	6.19	4.1	1.79	2.76	6.19	6.64	5.89	0.52	3.43	5.97
ENSMUSG00000001891	ENSMUST00000060895	Ugp2	0.784874	0.665862	0.119012	0.472645	0.503687	-0.0310421	-0.150054	-0.162174	201	67	1494	39	349	31	49529	0.849	5.679	3.832	10	0	2	1	0	0	0	0	21.1694	3.82	3.82	6.84	5.43	0.6	6.64	3.42	6.84	2.21	6.84	11.07	8.05	1.81	4.23	4.43	7.04	5.84	0.6	2.82	7.65
ENSMUSG00000001901	ENSMUST00000001965	Kcnh6	1	1	0						30	49	2853	58	485	54	26377	1.956	-5.996	4.557	13	0	0	1	0	0	0	0	40.8851	6.95	5.68	3.05	5.05	2	4.42	4.53	6.63	3.26	5.16	12	3.58	1.79	4.95	6.32	8.84	5.05	1.05	3.16	6.53
ENSMUSG00000001909	ENSMUST00000001974	Trmt1	0.369236	-0.117713	0.48695	0.556605	0.205581	0.351024	-0.135926	0.323295	531	48	1992	56	44	38	10943	0.75	-6.883	-14.864	17	2	0	0	0	0	0	13.49	36.858	11.46	7.54	3.17	4.52	3.32	6.64	4.07	7.09	2.41	3.77	8.75	4.52	1.81	3.32	7.84	6.33	3.92	1.06	1.81	6.64
ENSMUSG00000001910	ENSMUST00000001975	Nacc1	0.745483	0.714091	0.0313916	0.765566	0.762209	0.00335743	-0.0280342	0.0481174	236	79	1545	55	2563	55	17424	1.208	-5.614	-13.27	6	0	0	0	0	0	0	2.98	41.1306	8.17	5.45	4.47	4.28	2.72	7.39	5.25	5.84	2.14	2.92	8.56	3.89	3.7	3.31	5.64	10.89	5.64	0.58	2.72	6.42
ENSMUSG00000001911	ENSMUST00000109762	Nfix	0.124962	0.226165	-0.101202	0.0692332	0.351147	-0.281914	-0.180711	0.124982	1013	53	1176	57	72	36	65744	0.622	-5.238	-3.994	9	1	0	1	0	0	0	0	44.6154	5.63	5.63	2.56	6.39	1.79	4.86	5.37	6.14	3.58	4.35	7.67	6.14	1.02	4.6	8.18	10.74	5.88	1.28	2.56	5.63
ENSMUSG00000001918	ENSMUST00000108496	Slc1a5	0.405211	0.334203	0.0710079	0.357453	0.457611	-0.100158	-0.171166	0.123408	561	55	1668	58	535	48	16935	0	-10.65	-0.951	9	0	0	0	0	0	0	1.62	34.8375	11.35	3.78	3.24	3.96	2.34	3.78	1.98	8.47	0.54	6.13	14.05	3.96	2.34	4.5	5.23	7.57	4.68	0.9	1.26	9.91
ENSMUSG00000001924	ENSMUST00000089217	Uba1	0.639977	0.140993	0.498984	0.614104	0.207936	0.406168	-0.0928165	0.0669431	201	59	3177	51	666	46	24854	1.867	-3.122	-7.472	26	0	1	1	0	0	0	0	32.9234	7.28	4.54	4.25	5.86	1.98	6.24	5.67	6.33	2.08	3.69	10.11	5.1	2.46	4.82	5.67	7.47	4.82	0.95	3.02	7.66
ENSMUSG00000001930	ENSMUST00000112253	Vwf	1	0.26812	0.73188						228	55	1218	54	738	50	39509	0	-5.412	-6.168	10	0	0	1	0	0	0	0	38.3663	6.17	5.19	3.46	5.68	8.64	6.67	4.44	7.65	1.48	2.72	8.64	2.72	2.47	5.43	5.68	9.14	5.43	1.23	3.21	3.95
ENSMUSG00000001930	ENSMUST00000112253	Vwf	1	0.26812	0.73188						228	55	1218	54	738	50	39509	0	-5.412	-6.168	10	0	0	1	0	0	0	0	38.3663	6.17	5.19	3.46	5.68	8.64	6.67	4.44	7.65	1.48	2.72	8.64	2.72	2.47	5.43	5.68	9.14	5.43	1.23	3.21	3.95
ENSMUSG00000001930	ENSMUST00000112254	Vwf	1	0.26812	0.73188						252	56	8442	55	140	53	133732	0	-6.879	0.209	52	0	1	0	0	0	0	6.14	38.8336	5.87	4.98	3.41	5.51	8.35	6.47	5.01	6.9	2.81	3.48	7.96	3.59	1.67	3.2	6.4	7.57	5.62	0.85	2.74	7.61
ENSMUSG00000001930	ENSMUST00000112254	Vwf	1	0.26812	0.73188						252	56	8442	55	140	53	133732	0	-6.879	0.209	52	0	1	0	0	0	0	6.14	38.8336	5.87	4.98	3.41	5.51	8.35	6.47	5.01	6.9	2.81	3.48	7.96	3.59	1.67	3.2	6.4	7.57	5.62	0.85	2.74	7.61
ENSMUSG00000001942	ENSMUST00000215474	Siae	0.747253	0.584377	0.162876	0.547818	0.150539	0.397279	0.234403	-0.433838	190	66	1626	48	3131	42	35986	0.907	-1.08	-3.414	10	0	0	3	0	0	0	0	25.3704	5.36	4.62	4.25	4.44	2.59	4.44	5.18	7.02	2.22	4.62	7.95	3.51	3.51	4.81	6.1	8.13	7.02	2.59	3.7	7.95
ENSMUSG00000001946	ENSMUST00000002011	Esam	1	0.63406	0.36594	0.405484	0.679037	-0.273553	-0.639493	0.0449765	143	62	1185	54	537	47	10242	0	-6.758	-3.704	7	0	1	0	0	0	0	0	30.5344	8.88	5.08	3.55	2.03	1.27	5.08	4.06	7.61	1.02	3.3	10.91	4.31	2.03	2.03	8.63	10.91	6.09	1.27	1.78	10.15
ENSMUSG00000001948	ENSMUST00000002013	Spa17									196	50	450	45	50	44	10433	0	0.871	6.875	5	0	0	0	0	0	0	0	32.4324	8.72	6.04	6.04	3.36	0.67	18.79	4.7	4.03	2.01	3.36	6.71	8.05	1.34	6.04	4.7	5.37	4.03	0.67	2.01	3.36
ENSMUSG00000001962	ENSMUST00000114160	Fam50a	0.457714	0.449231	0.00848262	0.639538	0.317812	0.321726	0.313244	-0.13142	182	66	1020	49	181	49	7117	2.697	0.392	-3.414	13	0	1	0	0	0	0	0	45.2663	6.19	6.78	2.36	5.31	0	15.93	4.42	3.54	2.65	4.42	7.96	13.57	3.54	3.24	2.06	6.19	3.54	1.47	2.65	4.13
ENSMUSG00000001964	ENSMUST00000002029	Emd	0.876128	0.504055	0.372073	0.747542	0.492856	0.254686	-0.117387	-0.0111993	265	66	780	51	550	49	3201	0	0.768	-5.009	6	0	0	0	0	0	1	1.48	34.8837	6.56	5.79	1.93	7.72	0	6.18	5.02	4.25	1.54	3.47	9.65	3.86	1.54	4.25	5.79	15.06	4.25	1.16	7.34	4.63
ENSMUSG00000001983	ENSMUST00000002048	Taco1	0.453693	0.616351	-0.162657	0.558679	0.505356	0.0533233	0.215981	-0.110995	187	62	885	51	311	51	7552	0.74	-2.661	-10.081	5	0	1	0	0	0	0	0	36.5188	9.52	5.1	5.44	3.4	2.72	8.84	1.7	7.48	3.74	5.1	9.86	8.16	2.72	2.72	4.42	8.16	2.04	1.02	1.7	6.12
ENSMUSG00000001985	ENSMUST00000030676	Grik3	1	1	0						131	83	2760	56	6082	52	223474	1.953	-4.556	-22.98	16	0	0	1	0	0	0	0	41.0675	7.29	5.66	4.03	5.44	1.63	5.44	3.26	6.31	2.29	7.07	9.79	5.22	3.59	4.9	4.35	6.75	5.77	2.07	3.37	5.77
ENSMUSG00000001986	ENSMUST00000076349	Gria3	-1.00695	-0.555066	-0.451889	-1.6153	-0.325896	-1.2894	-0.837513	0.22917	261	52	2667	45	2264	38	277298	0	2.911	-7.183	16	0	5	3	0	0	0	2.08	24.5772	6.53	5.52	4.84	4.28	1.13	6.19	3.94	7.21	1.58	6.19	7.55	5.74	3.04	5.52	3.72	7.77	5.41	1.58	4.73	7.55
ENSMUSG00000001995	ENSMUST00000212168	Sipa1l2	0.213284	0.198355	0.0149293	0.418487	0.544028	-0.125541	-0.140471	0.345673	400	61	5115	55	1071	47	151683	0	-5.315	1.368	22	0	2	4	0	0	0	0	41.2214	6.51	6.4	3.11	5.99	2	6.57	4.11	7.75	2.76	3.99	8.1	5.4	1.7	3.93	6.22	10.86	5.63	0.82	2.35	5.81
ENSMUSG00000001998	ENSMUST00000002063	Ap4e1	0.435551	0.163644	0.271907	0.564196	0.183552	0.380643	0.108736	0.0199086	24	61	3369	44	1207	37	59180	0	2.953	5.281	21	0	3	4	0	0	0	0	22.3907	6.42	3.48	2.76	4.46	1.78	8.02	4.81	5.17	2.67	5.17	13.1	6.15	2.14	3.65	4.46	9.71	5.26	0.8	2.76	7.22
ENSMUSG00000001999	ENSMUST00000110389	Blvra	0.897627	0.809671	0.0879551	0.576478	0.307056	0.269423	0.181468	-0.502616	155	55	423	50	79	46	16727	0	-3.675	-1.241	6	0	0	0	0	0	0	0	31.6547	9.29	8.57	2.14	4.29	0.71	7.14	5.71	6.43	2.14	3.57	12.14	3.57	1.43	3.57	2.14	11.43	2.14	1.43	2.86	9.29
ENSMUSG00000002006	ENSMUST00000002080	Pdzd4	0.477588	0.180726	0.296862	-0.71685	-0.0286085	-0.688241	-0.985103	-0.209335	628	72	2319	57	1023	49	31611	0	-8.744	8.035	8	0	0	0	0	0	2	12.1	43.8392	5.7	8.81	3.89	5.96	1.42	10.62	4.27	7.38	2.33	3.5	10.62	5.57	2.85	1.55	5.7	8.55	4.02	0.65	2.07	4.53
ENSMUSG00000002007	ENSMUST00000002081	Srpk3									46	60	1698	54	237	50	4521	0	-6.065	-12.255	15	0	0	0	0	0	0	0	36.1702	6.73	6.02	2.48	4.96	2.48	6.9	4.25	8.14	3.01	4.78	9.73	5.49	1.42	2.65	6.19	10.62	4.07	1.77	2.83	5.49
ENSMUSG00000002010	ENSMUST00000052761	Idh3g	0.80232	0.383092	0.419229	0.821019	0.456518	0.364501	-0.0547274	0.0734261	42	44	1182	51	107	47	7935	1.157	-2.165	-2.255	13	0	0	0	0	0	0	1.42	35.2041	10.43	5.6	6.11	3.82	1.78	4.83	2.8	6.62	4.33	7.89	7.89	5.34	3.56	1.78	4.33	6.36	5.6	0.25	2.29	8.4
ENSMUSG00000002012	ENSMUST00000114472	Pnck	0.235128	0.399919	-0.164791						101	76	1032	55	399	51	4123	0	-7.297	-14.139	12	0	0	0	1	0	0	0	40.6433	7.58	5.54	1.75	5.25	1.46	7.87	4.37	7	3.79	5.54	11.37	5.54	2.04	4.08	4.66	9.04	3.21	1.46	3.21	5.25
ENSMUSG00000002014	ENSMUST00000002090	Ssr4	0.346371	0.179769	0.166601	0.202298	0.12812	0.0741776	-0.0924235	-0.0516494	178	66	519	51	68	41	3765	0	-4.316	-19.791	6	0	0	0	0	0	0	0	30.9942	9.88	4.07	2.91	3.49	2.33	5.81	4.07	5.23	2.33	5.81	8.72	2.91	1.74	4.07	3.49	11.05	6.4	1.74	4.65	9.3
ENSMUSG00000002015	ENSMUST00000002091	Bcap31	0.639303	0.296217	0.343086	0.258057	0.0278464	0.230211	-0.112876	-0.26837	102	54	738	47	379	44	29998	1.644	0.074	2.962	8	0	0	0	0	0	0	0	33.1967	8.98	4.08	4.49	4.08	0.41	9.8	4.49	3.27	1.22	3.67	15.1	11.02	2.45	4.49	1.63	5.71	4.49	0.82	2.45	7.35
ENSMUSG00000002017	ENSMUST00000112507	Fam98a	0.765502	0.606089	0.159414	0.831871	0.801667	0.0302039	-0.12921	0.195578	153	60	1548	50	1116	39	14861	1.627	-2.214	5.861	8	0	0	3	0	0	0	4.77	27.4319	5.63	6.21	2.52	3.5	1.55	6.41	6.6	18.64	3.11	2.72	8.35	5.83	1.75	2.33	5.05	7.57	3.3	1.17	4.08	3.69
ENSMUSG00000002020	ENSMUST00000110254	Ltbp2									204	63	5361	59	1037	49	93283	0	-8.684	-6.603	35	0	0	0	0	0	0	0	40.7843	6.77	6.66	3.98	4.7	8.85	7.28	4.82	9.41	2.91	2.63	6.49	1.62	0.9	2.24	9.35	7.89	5.04	1.01	2.41	5.04
ENSMUSG00000002028	ENSMUST00000002095	Kmt2a	0.0654897	0.306634	-0.241144	0.313389	0.524586	-0.211197	0.0299475	0.217952	22	58	11892	51	4547	44	77942	4.701		2.383	36	0	5	5	0	0	0	0	35.1338	6.74	5.98	3.51	4.57	2.12	6.21	4.59	6.59	2.2	3.76	7.01	7.72	1.54	2.47	9.66	13.07	5.37	0.53	1.34	5.02
ENSMUSG00000002031	ENSMUST00000002099	Ift46	0.77555	-0.0207029	0.796253	0.790687	0.391784	0.398903	-0.397349	0.412487	396	55	906	50	2867	49	20538	0	1.894	6.151	12	1	0	3	0	0	0	2.95	37.3333	5.65	1.66	2.66	11.96	0.66	9.3	3.65	2.99	3.32	5.98	9.63	7.31	1.66	3.99	8.31	8.97	4.98	1	2.99	3.32
ENSMUSG00000002032	ENSMUST00000002100	Tmem25	-1.52725	-1.15554	-0.371704	0.378029	0.458928	-0.0808983	0.290805	1.61447	151	68	1098	56	1199	52	5532	0	-6.083	-17.907	9	0	0	0	0	0	0	0	33.2418	9.04	6.03	4.93	3.56	1.1	4.66	5.21	7.95	1.92	2.74	15.34	2.19	1.1	2.19	6.58	8.77	6.58	1.37	1.37	7.4
ENSMUSG00000002033	ENSMUST00000002101	Cd3g	0.784166	0.46493	0.319236	0.327948	0.0939988	0.233949	-0.0852867	-0.370932	111	57	549	46	363	42	10860	0.878	1.557	-1.386	7	0	0	0	1	0	0	0	32.5967	5.49	4.4	6.59	4.95	2.2	3.85	8.79	9.34	0.55	6.04	12.64	7.14	1.1	2.75	2.2	6.04	6.04	1.1	3.85	4.95
ENSMUSG00000002043	ENSMUST00000002112	Trappc6a	0.266411	-0.0363011	0.302712	0.177892	0.0961912	0.0817006	-0.221012	0.132492	37	72	480	63	268	56	7434	0.931	-14.125	-8.777	6	0	0	0	0	0	0	0	50	9.43	4.4	1.26	4.4	2.52	6.29	5.03	8.81	2.52	0.63	15.72	3.77	3.14	6.92	5.66	5.66	5.03	1.26	1.26	6.29
ENSMUSG00000002052	ENSMUST00000002121	Supt6	0.814208	0.302127	0.512081	0.754896	0.3486	0.406297	-0.105784	0.0464724	470	58	5181	51	837	54	39242	6.369	-0.21	-10.951	37	0	1	1	0	0	0	7.99	38.3188	6.55	6.32	3.48	8.23	1.22	11.3	5.68	5.16	1.97	4.69	7.3	6.84	2.14	3.88	5.16	5.33	4.92	1.1	3.77	4.98
ENSMUSG00000002055	ENSMUST00000045026	Spag5	0.525016	0.237214	0.287802	0.265247	0.29675	-0.0315027	-0.319305	0.0595356	131	58	3498	50	258	41	20929	0	-1.355	-4.139	24	0	1	2	0	0	0	0	33.5911	7.3	4.38	2.49	4.21	1.55	11.59	8.24	3.09	2.32	2.58	14.68	5.75	1.8	1.89	4.55	9.96	6.44	0.86	0.43	5.92
ENSMUSG00000002058	ENSMUST00000002127	Unc119	0.73844	0.325855	0.412585	0.802336	0.443195	0.359141	-0.0534439	0.11734	85	79	723	59	521	56	5683	0	-11.588	-48.632	5	0	0	1	0	0	0	0	50.6276	3.75	7.5	3.75	5.83	1.25	8.33	2.92	9.17	2.08	5	6.25	5	2.08	6.67	9.58	7.5	4.17	0	3.75	5.42
ENSMUSG00000002059	ENSMUST00000002128	Rab34	0.084939	0.425432	-0.340493	-2.64157	-0.48493	-2.15664	-1.81615	-0.910362	241	69	780	53	347	50	3759	0	-3.312	-15.588	11	0	1	0	0	0	0	0	37.2093	9.65	5.41	4.25	5.79	3.09	6.56	3.09	4.25	1.93	4.63	10.04	8.49	1.16	5.41	2.7	5.41	5.79	1.16	2.32	8.88
ENSMUSG00000002064	ENSMUST00000002133	Sdf2	0.63631	0.34144	0.29487	0.718902	0.408569	0.310333	0.0154632	0.0671288	250	56	660	52	358	44	9751	0.502	-6.072	-6.168	3	0	0	0	0	0	0	0	28.8991	4.57	5.94	4.57	3.65	1.83	5.48	3.65	10.96	5.02	3.2	9.13	3.2	2.74	1.83	3.2	10.96	5.94	2.28	2.74	9.13
ENSMUSG00000002068	ENSMUST00000108023	Ccne1	0.923513	0.895446	0.0280671	0.955962	0.725885	0.230076	0.202009	-0.16956	242	74	1227	48	531	51	9551	0	1.711	-0.516	12	0	1	0	0	0	0	1.56	31.2039	5.88	5.15	3.43	5.88	1.96	7.84	5.15	2.94	2.45	4.66	10.54	6.37	3.92	3.43	6.62	7.84	3.68	1.96	3.19	7.11
ENSMUSG00000002076	ENSMUST00000238192	Hsf2bp	-0.184201	0.51208	-0.696281	0.235724	-0.3493	0.585024	1.2813	-0.86138	264	54	1017	49	1834	46	91581	0	-0.595	-16.748	9	0	1	2	0	0	0	0	32.6409	6.51	4.73	3.55	5.03	2.07	9.47	6.21	5.03	0.89	3.55	15.09	7.4	3.25	3.55	2.07	7.69	4.73	0.89	0.89	7.4
ENSMUSG00000002083	ENSMUST00000002152	Bbc3	0.971018	0.843342	0.127676	0.945268	0.91399	0.0312784	-0.0963976	0.0706482	261	65	582	71	971	60	8590	0	-16.327	-18.197	4	0	0	0	0	0	0	0	56.25	13.99	10.88	1.55	2.59	1.55	8.29	4.66	8.29	2.07	0.52	9.33	0	3.11	1.04	17.62	6.22	1.55	1.55	1.55	3.63
ENSMUSG00000002100	ENSMUST00000169776	Mybpc3									25	64	3837	56	301	52	18373	0	-7.983	7.745	35	0	0	0	0	0	0	0	40.7204	7.59	5.87	2.27	5.95	1.64	8.14	3.99	7.51	1.96	3.99	7.2	7.28	1.41	3.21	6.73	6.34	5.79	1.49	2.43	9.23
ENSMUSG00000002102	ENSMUST00000067663	Psmc3	0.842783	0.300603	0.54218	0.804354	0.257681	0.546673	0.00449284	-0.0429212	239	65	1329	52	68	45	5424	1.872	-2.876	-9.646	12	0	0	0	0	0	0	0	41.7234	7.92	5.2	3.85	7.01	1.13	9.5	5.2	5.66	0.9	6.11	10.18	8.14	3.62	2.26	4.75	3.62	5.43	0.23	2.26	7.01
ENSMUSG00000002103	ENSMUST00000002172	Acp2	0.782061	0.495777	0.286284	0.78103	0.594817	0.186213	-0.100072	0.0990404	26	49	1272	52	3358	44	11190	0.806	-1.501	7.745	11	0	0	2	0	0	0	0	35.3081	6.38	4.96	4.49	3.78	1.89	5.2	8.51	4.96	3.31	3.55	13.48	3.31	2.36	4.96	7.09	4.02	6.62	1.89	3.55	5.67
ENSMUSG00000002104	ENSMUST00000050323	Rapsn	-1.16965	0.399919	-1.56957	-0.00685807	-0.806062	0.799204	2.36877	-1.20598	156	61	1239	57	211	54	10089	0	-10.393	-9.936	8	0	0	0	0	0	0	3.5	45.0122	7.77	6.31	3.16	3.88	5.1	7.28	5.58	7.52	3.16	2.67	13.11	6.31	3.4	3.64	1.7	7.04	3.16	0.73	3.4	5.1
ENSMUSG00000002105	ENSMUST00000073575	Slc39a13	0.658792	0.103159	0.555633	0.636874	0.28713	0.349744	-0.205889	0.183971	271	76	1086	58	1112	54	8627	0	-10.261	-8.197	10	0	0	0	0	0	0	5.03	35.8333	10.25	3.32	2.77	2.77	2.77	5.26	4.16	10.25	1.66	3.32	19.67	2.49	1.94	4.43	4.99	6.37	4.43	2.22	0.83	6.09
ENSMUSG00000002107	ENSMUST00000002176	Celf2	0.366263	0.325426	0.0408374	0.285712	0.252643	0.033069	-0.00776842	-0.0727832	237	49	1455	49	6026	40	856307	6.037	-0.941	3.687	16	1	1	8	0	0	0	0	32.0911	12.6	2.89	5.99	3.51	1.45	3.1	9.3	8.26	1.24	4.13	9.71	4.96	3.93	3.93	4.55	8.26	6.2	0.41	2.07	3.51
ENSMUSG00000002108	ENSMUST00000111354	Nr1h3	0.617564	-0.549189	1.16675	0.690194	0.63014	0.0600537	-1.1067	1.17933	156	58	1338	56	244	52	11060	0	-7.313	-18.052	10	0	0	0	0	0	0	0	41.4414	7.42	7.64	2.47	4.04	2.7	8.76	6.97	4.49	2.25	4.04	11.01	4.72	2.92	4.04	6.74	8.09	3.6	0.9	1.57	5.62
ENSMUSG00000002109	ENSMUST00000028696	Ddb2	0.328166	-0.0228722	0.351038	0.411552	0.139369	0.272183	-0.0788545	0.162241	166	53	1299	49	92	48	25127	0	-0.889	6.296	10	0	0	0	0	0	0	0	32.4826	5.32	5.32	3.94	5.32	2.55	3.24	4.4	6.48	4.17	4.86	10.42	6.71	2.08	3.47	5.32	10.88	5.56	2.31	2.31	5.32
ENSMUSG00000002111	ENSMUST00000002180	Spi1	0.93687	0.448752	0.488118	1	0.788927	0.211073	-0.277045	0.340175	853	57	819	57	362	62	19661	0	-5.506	-7.183	5	1	0	0	0	0	0	14.66	48.7085	3.68	4.78	2.21	5.88	0.74	7.72	6.62	7.72	5.88	1.1	9.56	6.99	4.04	4.04	6.62	8.09	4.04	1.47	4.41	4.41
ENSMUSG00000002129	ENSMUST00000002198	Sf3a1	0.896582	0.554622	0.341961	0.869103	0.505912	0.363191	0.0212303	-0.0487092	138	57	2376	54	2406	44	22192	1.81	-0.755	-17.472	16	0	1	1	0	0	0	0	40.8861	7.21	4.42	2.91	4.68	0.13	10.37	7.08	3.92	1.39	5.69	4.93	7.33	2.78	3.16	14.54	5.06	4.17	0.63	2.02	7.59
ENSMUSG00000002147	ENSMUST00000092074	Stat6	0.753174	0.0668729	0.686301	0.750636	0.456382	0.294254	-0.392047	0.389509	285	59	2514	54	976	47	17972	1.637	-5.143	-3.125	22	0	1	0	0	0	0	4.23	39.3541	5.14	4.9	2.99	4.06	1.43	6.93	7.77	6.69	1.79	4.3	12.78	4.78	2.99	4.06	7.05	8.72	5.38	1.43	1.55	5.26
ENSMUSG00000002190	ENSMUST00000002259	Clgn									120	68	1836	44	1946	41	38686	0	3.807	-3.414	15	0	1	5	0	0	0	0	25.4098	5.89	2.78	3.44	9.82	1.31	10.97	2.78	5.89	1.47	5.24	7.36	9.33	2.13	3.93	8.35	4.75	3.6	2.62	2.45	5.89
ENSMUSG00000002204	ENSMUST00000002274	Napsa	1	1	0						236	53	1260	55	64	37	14483	0	-6.381	-2.98	9	0	0	0	0	0	0	0	35.1675	5.73	4.53	3.58	3.82	1.67	3.58	4.3	11.22	2.39	5.01	13.13	2.86	0.95	6.68	7.64	7.16	5.97	1.67	2.15	5.97
ENSMUSG00000002205	ENSMUST00000002275	Vrk3	0.717023	0.357595	0.359428	0.770899	0.503965	0.266934	-0.0924942	0.14637	302	59	1362	55	305	47	29103	0	-4.493	5.571	15	0	0	0	0	0	0	13.78	41.5929	4.19	6.18	3.75	5.3	3.09	5.08	4.64	6.4	2.43	1.77	11.92	6.4	1.32	3.31	6.84	9.49	6.62	1.32	3.53	6.4
ENSMUSG00000002210	ENSMUST00000002280	Smg9	0.61461	-0.311558	0.926167	0.804466	0.216615	0.587851	-0.338317	0.528173	279	63	1563	58	400	60	23160	0.562	-7.03	-16.893	14	1	0	0	0	0	0	2.02	43.5453	6.92	5.96	2.88	4.42	0.77	6.54	5.38	6.73	2.5	3.65	9.23	4.42	3.65	3.27	10.77	8.85	4.81	1.15	2.69	5.38
ENSMUSG00000002221	ENSMUST00000002291	Paxip1	0.631458	0.345254	0.286205	0.665068	0.618732	0.0463359	-0.239869	0.273478	271	76	3171	53	2408	42	51471	0.915	-2.075	-32.11	21	0	2	2	0	0	0	1.83	40	6.91	3.98	3.31	3.31	2.18	6.63	12.78	4.36	3.5	4.07	10.51	5.49	1.33	3.41	8.24	6.34	4.26	1.04	2.18	6.16
ENSMUSG00000002222	ENSMUST00000002292	Rmnd5a	0.761734	0.661383	0.10035	0.546146	0.459059	0.0870875	-0.0132626	-0.202325	498	78	1176	45	4491	40	52004	2.469	1.954	-30.081	9	0	1	11	0	0	0	3.62	27.1795	5.88	4.35	4.09	5.88	3.84	6.65	6.65	5.88	2.81	5.88	12.02	5.88	2.3	3.84	3.58	7.67	2.81	1.28	2.05	6.65
ENSMUSG00000002227	ENSMUST00000168015	Mov10	0.511062	0.00511037	0.505952	0.703123	0.350951	0.352172	-0.15378	0.345841	132	65	3015	56	313	52	23470	0	-4.601	-8.632	21	0	1	0	0	0	0	0	39.681	5.38	7.27	2.89	4.68	1.39	6.37	4.38	6.97	2.99	3.98	13.55	5.78	1.1	4.38	7.37	6.08	5.08	1	3.19	6.18
ENSMUSG00000002228	ENSMUST00000002298	Ppm1j	0.648433	0.311617	0.336817	0.718921	0.432755	0.286166	-0.0506508	0.121139	31	80	1524	59	166	50	4963	0	-10.615	-17.907	10	0	0	0	0	0	0	0	40.5138	6.9	7.89	2.96	4.93	2.17	6.11	4.14	8.88	2.56	2.96	9.66	3.55	1.78	2.76	7.69	8.88	4.93	1.18	2.56	7.5
ENSMUSG00000002233	ENSMUST00000196817	Rhoc	0.949009	0.308826	0.640182	0.779809	0.275766	0.504043	-0.136139	-0.0330605	56	44	582	54	239	60	5908	0	-4.237	5.136	5	0	0	0	0	0	0	0	43.2292	6.22	7.77	3.11	7.25	3.11	8.81	3.11	5.7	1.04	6.22	7.77	7.77	2.59	3.63	5.7	4.15	4.15	1.04	2.59	8.29
ENSMUSG00000002250	ENSMUST00000002320	Ppard	0.435273	0.458561	-0.023288	0.680873	0.776244	-0.0953706	-0.0720827	0.317683	329	67	1323	58	1625	58	68775	0	-6.955	-16.893	8	0	0	1	0	0	0	11.04	49.2027	7.27	4.32	4.77	4.32	3.18	7.95	5.23	5.91	3.41	4.55	11.14	7.27	3.18	5	4.32	6.36	3.86	0.68	2.5	4.77
ENSMUSG00000002257	ENSMUST00000002327	Def6	0.742695	0.267088	0.475607	0.794607	0.427669	0.366938	-0.108669	0.160581	65	66	1893	60	319	49	20831	4.232	-10.394	-23.414	11	0	0	0	0	0	0	0	52.4642	7.62	9.05	2.54	4.13	1.43	12.7	9.68	4.29	1.9	2.22	13.02	6.67	2.22	2.22	3.02	6.51	3.17	1.59	2.06	3.97
ENSMUSG00000002266	ENSMUST00000002336	Zim1									299	53	1740	49	5654	39	25182	0	1.16	2.383	8	0	1	8	0	0	0	5.76	39.7924	4.66	5.87	3.8	3.97	4.84	6.56	4.49	6.04	5.01	3.28	5.35	13.3	0.52	3.28	5.7	8.98	7.6	0.35	2.42	3.97
ENSMUSG00000002274	ENSMUST00000165838	Metrn	0.656318	0.541489	0.114829	0.471318	0.637554	-0.166235	-0.281065	0.0960647	121	83	876	63	1754	52	3863	0	-15.009	-13.704	4	0	0	2	0	0	4	0	39.3103	11	9.28	0.69	3.78	4.47	6.87	3.78	10.65	2.41	2.75	12.37	0.34	2.06	4.12	5.84	6.19	5.5	1.72	1.03	5.15
ENSMUSG00000002279	ENSMUST00000116641	Lmf1	0.319278	0.0256782	0.293599	0.600428	0.452386	0.148042	-0.145558	0.426708	10	50	1725	56	123	56	83650	0	-5.76	6.151	11	0	1	0	0	0	0	0	36.6492	6.45	6.45	3.48	3.48	1.39	4.01	4.01	6.79	2.09	5.57	13.94	3.48	2.09	5.92	6.97	5.92	4.7	4.36	3.14	5.75
ENSMUSG00000002280	ENSMUST00000002350	Ciao3	0.826484	0.215485	0.610998	0.88011	0.367198	0.512912	-0.0980862	0.151713	46	62	1431	55	1078	55	9557	0	-6.068	-9.791	11	0	0	0	0	0	0	0	38.1053	7.77	5.88	2.52	4.62	2.31	7.77	6.93	6.72	2.73	3.15	10.08	5.04	1.05	4.83	5.04	7.77	4.83	0.63	2.94	7.35
ENSMUSG00000002289	ENSMUST00000002360	Angptl4	1	0.87802	0.12198	0.810068	0.957237	-0.147168	-0.269148	0.0792166	438	56	1233	57	1637	43	8081	0	-8.016	-5.009	7	0	0	1	0	0	0	1.53	42.7873	7.56	5.85	4.39	4.63	1.95	4.88	9.51	9.51	2.93	2.68	12.2	4.39	1.71	3.41	6.1	6.1	5.85	2.44	1.46	2.44
ENSMUSG00000002289	ENSMUST00000002360	Angptl4	1	0.87802	0.12198	0.810068	0.957237	-0.147168	-0.269148	0.0792166	438	56	1233	57	1637	43	8081	0	-8.016	-5.009	7	0	0	1	0	0	0	1.53	42.7873	7.56	5.85	4.39	4.63	1.95	4.88	9.51	9.51	2.93	2.68	12.2	4.39	1.71	3.41	6.1	6.1	5.85	2.44	1.46	2.44
ENSMUSG00000002289	ENSMUST00000173869	Angptl4	1	0.87802	0.12198	0.810068	0.957237	-0.147168	-0.269148	0.0792166	151	57	465	60	1243	54	6636	0	-11.632	-5.009	7	0	0	0	0	0	0	0	46.4052	11.69	7.79	3.25	2.6	2.6	5.19	12.99	7.79	1.95	1.3	12.34	4.55	1.95	1.95	7.14	5.19	5.19	1.3	0.65	2.6
ENSMUSG00000002289	ENSMUST00000173869	Angptl4	1	0.87802	0.12198	0.810068	0.957237	-0.147168	-0.269148	0.0792166	151	57	465	60	1243	54	6636	0	-11.632	-5.009	7	0	0	0	0	0	0	0	46.4052	11.69	7.79	3.25	2.6	2.6	5.19	12.99	7.79	1.95	1.3	12.34	4.55	1.95	1.95	7.14	5.19	5.19	1.3	0.65	2.6
ENSMUSG00000002297	ENSMUST00000002368	Dbf4	0.8782	0.666485	0.211715	0.811354	0.578318	0.233036	0.0213205	-0.0881671	168	76	1989	42	244	26	25708	0.375	4.895	-13.704	12	0	0	0	0	0	0	0	25.5673	5.29	4.38	3.78	5.44	2.42	7.85	5.89	5.44	2.27	3.63	9.52	9.67	1.06	3.47	6.8	10.27	4.53	0.45	3.02	4.83
ENSMUSG00000002307	ENSMUST00000170075	Daxx	0.927665	0.56164	0.366025	0.878114	0.625998	0.252116	-0.113909	0.0643584	270	68	2223	55	180	37	5982	1.265	-5.977	-13.559	8	0	1	0	0	0	0	3.07	41.1367	6.89	7.3	3.11	8.24	1.49	10.95	5.14	5.54	1.22	2.84	10.41	4.32	1.08	1.62	7.7	10.81	5.54	0.14	1.76	3.92
ENSMUSG00000002308	ENSMUST00000087559	Cd320	0.937117	0.756427	0.18069	0.939483	0.66294	0.276543	0.0958531	-0.0934871	127	59	741	52	323	52	5326	0	-4.241	0.499	5	0	1	0	0	0	0	0	34.6939	6.5	5.28	3.25	8.54	7.32	5.28	3.66	6.1	2.03	4.88	11.79	1.63	0.81	2.03	4.88	11.79	7.32	1.22	1.63	4.07
ENSMUSG00000002319	ENSMUST00000047131	Ipo4	0.465575	-0.0962776	0.561853	0.563457	0.323962	0.239495	-0.322358	0.42024	86	76	3249	56	511	46	10285	1.566	-6.627	-24.719	30	0	0	1	0	0	0	0	37.3728	9.43	4.62	2.31	5.45	2.31	8.13	4.53	4.71	2.77	3.05	16.64	3.7	2.87	3.7	6.28	6.47	4.71	0.28	1.57	6.47
ENSMUSG00000002320	ENSMUST00000122358	Tm9sf1	0.594736	0.311727	0.283009	0.719653	0.472277	0.247376	-0.0356328	0.16055	442	70	1821	52	254	32	7842	0.902	-3.944	-7.617	6	0	0	1	0	0	0	1.56	28.7603	4.46	5.45	2.97	3.8	1.65	4.46	2.31	8.42	3.63	6.77	12.05	2.15	1.98	6.77	3.96	8.09	4.79	2.64	5.12	8.58
ENSMUSG00000002324	ENSMUST00000002395	Rec8	0.792847	0.718653	0.0741939	1	1	0	-0.0741939	0.281347	374	56	1776	56	34	43	7359	0	-5.01	-0.516	20	0	0	0	0	0	0	1.96	36.2712	7.11	8.46	1.02	2.88	1.02	12.01	6.26	3.55	1.35	3.72	14.55	3.38	2.2	2.37	11.68	5.41	4.57	1.52	1.69	5.25
ENSMUSG00000002325	ENSMUST00000130697	Irf9	0.902577	0.6172	0.285377	0.890845	0.535895	0.354949	0.0695724	-0.0813049	260	55	1200	54	999	43	6046	2.065	-5.247	-3.849	9	0	1	1	0	0	0	0	41.7085	6.27	6.02	4.76	4.26	2.51	8.77	5.01	7.27	3.51	3.26	8.52	5.26	1.5	4.26	7.52	8.52	4.01	1.75	1.5	5.51
ENSMUSG00000002326	ENSMUST00000002397	Gmpr2	0.943812	0.66859	0.275222	0.96515	0.670779	0.294372	0.0191495	0.00218911	159	51	1047	48	787	48	6966	1.284	-0.946	3.252	10	0	0	1	0	0	0	0	27.6657	7.47	4.6	2.3	4.89	2.59	6.61	3.45	9.77	2.87	6.32	6.61	6.9	3.45	4.89	3.16	8.62	4.6	0.29	2.87	7.76
ENSMUSG00000002329	ENSMUST00000002400	Mdp1	0.602091	0.187228	0.414863	0.577743	0.0665465	0.511197	0.0963336	-0.120681	134	62	495	51	1104	48	2630	0.381	-1.331	-4.284	6	0	0	1	0	0	0	0	36.1963	4.88	6.71	2.44	6.71	0.61	4.88	6.1	7.93	3.66	4.88	10.98	3.66	1.83	6.1	5.49	4.88	6.71	1.22	2.44	7.93
ENSMUSG00000002332	ENSMUST00000002403	Dhrs1	0.761487	0.440756	0.320731	0.75341	0.495696	0.257715	-0.0630162	0.0549395	271	57	942	52	264	46	6671	0	-3.946	-4.864	9	0	1	0	0	0	0	7.8	30.7692	7.99	5.11	3.51	5.11	2.88	4.15	3.51	9.27	1.6	3.19	10.22	5.75	2.56	3.19	5.11	7.99	3.51	1.6	3.19	10.54
ENSMUSG00000002341	ENSMUST00000002412	Ncan	1	-1.01267	2.01267						153	62	3807	59	3235	48	27789	0	-8.594	-15.154	15	0	0	0	0	0	0	2.51	39.779	8.75	6.39	2.44	5.28	2.68	6.94	3.79	8.75	3.31	2.6	7.81	2.52	1.81	2.29	9.23	9.23	5.91	2.21	1.81	6.23
ENSMUSG00000002342	ENSMUST00000182715	Tmem161a	0.531826	-0.0299196	0.561745	0.533465	0.0749443	0.458521	-0.103225	0.104864	33	72	579	61	1904	52	11263	0.905	-13.134	-20.226	8	0	0	2	0	0	0	0	31.9372	13.02	5.21	1.04	3.65	3.13	2.08	3.13	13.02	5.21	0	9.9	1.04	1.04	2.6	15.63	3.65	6.25	2.08	0.52	7.81
ENSMUSG00000002342	ENSMUST00000182715	Tmem161a	0.531826	-0.0299196	0.561745	0.533465	0.0749443	0.458521	-0.103225	0.104864	33	72	579	61	1904	52	11263	0.905	-13.134	-20.226	8	0	0	2	0	0	0	0	31.9372	13.02	5.21	1.04	3.65	3.13	2.08	3.13	13.02	5.21	0	9.9	1.04	1.04	2.6	15.63	3.65	6.25	2.08	0.52	7.81
ENSMUSG00000002342	ENSMUST00000002413	Tmem161a	0.531826	-0.0299196	0.561745	0.533465	0.0749443	0.458521	-0.103225	0.104864	33	72	1443	60	1542	49	11277	0.905	-9.856	-20.226	12	0	0	2	0	0	0	0	35.9081	9.38	5.83	0.83	2.5	2.29	4.58	4.79	5	2.5	2.71	19.58	2.5	1.46	5.42	5.42	5.63	6.25	2.5	3.13	7.71
ENSMUSG00000002342	ENSMUST00000002413	Tmem161a	0.531826	-0.0299196	0.561745	0.533465	0.0749443	0.458521	-0.103225	0.104864	33	72	1443	60	1542	49	11277	0.905	-9.856	-20.226	12	0	0	2	0	0	0	0	35.9081	9.38	5.83	0.83	2.5	2.29	4.58	4.79	5	2.5	2.71	19.58	2.5	1.46	5.42	5.42	5.63	6.25	2.5	3.13	7.71
ENSMUSG00000002343	ENSMUST00000019679	Armc6	0.90602	0.0293041	0.876716	0.911877	0.500491	0.411386	-0.46533	0.471187	363	61	1407	57	493	54	14295	0	-9.848	-10.516	8	0	0	0	0	0	0	1.88	40.257	13.25	5.56	3.21	5.77	3.42	6.62	7.05	5.98	2.99	4.49	13.68	4.27	1.5	1.92	2.56	4.7	4.06	0.64	0.43	7.91
ENSMUSG00000002345	ENSMUST00000002418	Borcs8	0.593472	0.461114	0.132357	0.558112	0.498788	0.0593237	-0.0730337	0.0376737	237	51	363	57	210	50	7758	0	-4.905	-5.154	6	0	0	0	0	0	0	0	43.6975	8.33	5	1.67	3.33	0.83	10	7.5	3.33	3.33	2.5	9.17	6.67	3.33	1.67	5	11.67	3.33	0.83	4.17	8.33
ENSMUSG00000002346	ENSMUST00000110127	Slc25a42	0.67219	0.616605	0.0555858	0.195799	0.20364	-0.00784093	-0.0634267	-0.412965	110	76	957	58	2129	53	27966	0	-8.985	-20.226	8	0	0	2	0	0	0	0	37.8549	9.75	8.49	1.57	1.89	0.31	5.03	3.14	9.12	2.2	4.72	11.95	3.46	2.52	5.35	4.4	8.49	5.35	0.94	4.72	6.6
ENSMUSG00000002365	ENSMUST00000002436	Snx9	0.817386	0.494245	0.323141	0.583659	0.482859	0.100801	-0.22234	-0.0113863	206	78	1788	50	1337	43	90626	1.513	-1.447	-23.559	18	0	1	4	0	0	0	0	37.3737	7.56	3.7	4.87	6.39	1.18	7.56	4.71	7.9	1.68	4.03	6.39	7.73	3.03	4.03	5.55	6.89	5.71	2.18	3.53	5.38
ENSMUSG00000002372	ENSMUST00000002445	Ranbp3	0.812297	0.0925257	0.719772	0.82606	0.386362	0.439698	-0.280074	0.293837	32	55	1476	57	865	56	38407	1.294	-6.34	4.557	16	0	0	1	0	0	0	4.22	45.3061	10.79	4.68	3.26	5.09	1.02	9.37	6.11	6.31	2.24	1.83	7.13	5.3	1.63	2.24	6.52	12.02	7.33	0.61	1.02	5.5
ENSMUSG00000002379	ENSMUST00000002452	Ndufa11	0.863867	0.469304	0.394564	0.773097	0.74747	0.0256263	-0.368937	0.278167	73	61	432	57	40	47	4371	0	-6.561	-6.893	4	0	0	0	0	0	0	0	40.8451	12.59	4.2	1.4	2.8	3.5	4.2	1.4	12.59	2.1	4.9	6.99	4.2	3.5	4.9	4.2	4.9	9.79	0.7	4.9	6.29
ENSMUSG00000002384	ENSMUST00000002457	Bmp8b									186	67	1200	57	1554	47	20927	0	-7.58	-21.241	7	0	0	5	0	0	0	1.72	39.4472	7.02	8.52	3.76	5.51	2.26	5.01	4.51	7.52	5.01	4.01	12.28	2.26	2.76	3.26	7.02	5.76	3.76	1.25	2.76	5.76
ENSMUSG00000002393	ENSMUST00000002466	Nr2f6	0.779044	0.589416	0.189629	0.758948	0.646072	0.112876	-0.0767528	0.0566562	689	76	1173	67	356	46	7834	0	-18.322	-36.458	4	0	0	0	0	0	0	10.4	52.9563	12.82	7.18	1.79	4.87	3.33	5.13	4.87	9.23	2.05	2.31	10.26	3.08	1.79	4.36	7.69	5.9	3.85	1.03	2.31	6.15
ENSMUSG00000002395	ENSMUST00000110054	Use1	0.215285	0.00975488	0.20553	0.368409	0.140583	0.227826	0.0222963	0.130828	137	50	813	55	23	47	2791	0.974	-5.977	6.441	9	0	0	0	0	0	0	0	40.5204	10.37	7.78	2.22	2.96	1.48	10	5.56	3.33	1.85	2.59	14.07	7.78	4.44	1.85	3.33	8.52	3.7	1.11	1.48	5.56
ENSMUSG00000002396	ENSMUST00000002469	Ocel1	0.764829	0.555425	0.209404	0.769234	0.725345	0.0438893	-0.165515	0.16992	336	69	660	63	615	51	2351	0	-13.235	-16.023	4	0	0	0	0	0	1	6.71	50.9174	9.59	15.07	2.28	5.02	1.37	6.85	6.85	5.94	2.28	1.37	8.68	5.48	1.37	3.2	11.42	5.48	1.37	0	2.74	3.65
ENSMUSG00000002409	ENSMUST00000085901	Dyrk1b	0.855276	0.694524	0.160753	0.884112	0.837226	0.0468853	-0.113867	0.142703	273	70	1890	61	371	62	7826	0	-9.002	-29.646	11	0	0	1	0	0	0	2.82	46.4968	7	7.15	2.86	4.61	1.75	4.45	4.77	7.95	3.02	3.97	11.13	4.29	1.91	2.7	10.97	8.27	4.77	0.64	3.5	4.29
ENSMUSG00000002413	ENSMUST00000002487	Braf	0.432371	0.345837	0.0865346	0.177242	0.179474	-0.00223261	-0.0887672	-0.166362	168	84	2415	48	7145	38	122227	0.767	-1.162	-39.936	22	0	0	26	0	0	0	0	29.1407	6.22	5.6	3.23	4.98	1.74	5.97	5.72	8.58	2.49	5.22	8.71	5.47	2.24	4.73	7.09	9.08	4.73	1	2.24	4.98
ENSMUSG00000002416	ENSMUST00000119379	Ndufb2	0.8769	0.425823	0.451077	0.471282	0.451016	0.0202651	-0.430812	0.0251936	32	55	318	58	105	39	6889	0	-11.575	-4.864	4	0	0	0	0	0	0	0	32.6923	5.71	10.48	0	7.62	0.95	4.76	4.76	11.43	3.81	3.81	9.52	0	1.9	5.71	6.67	7.62	2.86	4.76	1.9	5.71
ENSMUSG00000002455	ENSMUST00000002529	Prpf6	0.792556	0.065501	0.727055	0.835821	0.213893	0.621928	-0.105127	0.148392	142	55	2826	51	86	40	54342	3.411	-2.245	4.846	21	0	3	0	0	0	0	0	35.2128	10.52	7.86	4.25	5.1	1.49	9.67	3.72	5.42	2.13	4.36	9.35	7.44	2.44	2.13	4.99	4.68	4.57	2.34	2.13	5.42
ENSMUSG00000002458	ENSMUST00000002532	Rgs19	0.886501	0.770855	0.115645	0.921179	0.786649	0.13453	0.0188851	0.0157937	175	69	651	56	685	43	5556	0	-3.845	-9.646	6	0	0	1	0	0	0	1.4	38.6047	6.48	6.94	2.31	4.17	5.09	9.26	6.02	2.31	3.24	1.85	7.87	3.7	2.78	2.78	9.72	12.04	4.17	2.31	2.78	4.17
ENSMUSG00000002459	ENSMUST00000002533	Rgs20									160	58	720	51	898	40	109964	0	-0.355	-0.516	5	0	0	3	0	0	0	0	31.9328	7.95	8.79	4.18	4.6	5.44	10.04	4.6	4.6	1.26	4.18	5.86	2.51	4.18	3.35	6.28	8.79	6.28	1.26	2.09	3.77
ENSMUSG00000002475	ENSMUST00000117828	Abhd3									80	74	1236	51	646	30	62361	0	-1.719	-24.719	9	0	0	4	0	0	0	0	29.2683	6.57	5.11	3.89	3.89	2.43	4.87	3.41	7.06	3.16	4.14	11.44	3.65	3.16	4.87	4.62	7.54	6.08	1.46	5.11	7.54
ENSMUSG00000002477	ENSMUST00000002551	Snrpd1	0.962989	0.829273	0.133716	0.965341	0.826029	0.139312	0.00559556	-0.00324333	138	62	360	43	360	34	10456	0.847	5.173	5.136	4	0	0	0	0	0	0	0	21.1864	2.52	13.45	4.2	3.36	0	5.04	1.68	12.61	2.52	4.2	10.92	8.4	3.36	1.68	4.2	4.2	7.56	0	0.84	9.24
ENSMUSG00000002486	ENSMUST00000094441	Tchp	0.127495	-0.476176	0.603671	0.564502	0.597623	-0.0331212	-0.636792	1.0738	201	69	1494	58	1187	51	14568	0	-6.863	-7.328	13	0	0	0	0	0	0	0	57.8629	9.05	12.07	2.41	2.21	0.2	19.11	11.67	2.01	2.82	2.62	12.68	8.25	2.62	0.6	0.8	3.22	2.01	2.41	1.61	1.61
ENSMUSG00000002489	ENSMUST00000163370	Tiam1	0.329732	0.170869	0.158863	0.616424	0.528122	0.0883026	-0.0705599	0.357252	468	54	4776	55	2011	41	187589	0.789	-4.831	3.832	28	1	3	4	0	0	0	7.19	44.7799	7.48	6.35	3.14	6.03	1.45	8.23	4.27	5.72	2.83	3.33	9.62	6.66	1.63	3.77	4.65	10.75	5.59	0.94	2.14	5.41
ENSMUSG00000002496	ENSMUST00000097373	Tsc2	0.201371	-0.0237342	0.225105	0.510174	0.342368	0.167806	-0.0572995	0.366102	121	71	5229	54	668	50	36693	1.086	-3.721	-4.284	40	0	0	0	0	0	0	0	36.0138	6.95	6.08	3.04	4.99	2.07	6.6	3.73	5.11	2.81	4.94	12.86	4.71	2.01	3.21	6.08	9.64	5.05	0.8	2.93	6.37
ENSMUSG00000002504	ENSMUST00000002572	Slc9a3r2	0.337133	-0.24784	0.584973						177	77	1014	62	945	56	11042	0	-11.47	-36.603	7	0	0	0	0	0	0	0	49.1071	7.12	10.39	3.86	5.04	1.78	9.5	4.75	9.2	3.86	2.08	8.31	4.15	0.89	2.08	7.42	6.53	3.86	1.19	0.89	7.12
ENSMUSG00000002524	ENSMUST00000100527	Puf60	0.923471	0.459045	0.464426	0.926264	0.641924	0.284341	-0.180085	0.182879	40	75	1695	55	146	51	10732	0.747	-7.651	-7.183	12	0	0	0	0	0	0	0	38.1883	13.12	3.37	2.3	3.9	0.53	7.62	6.91	7.8	1.24	5.32	7.62	5.67	3.72	2.84	6.74	6.21	5.14	0.53	1.95	7.45
ENSMUSG00000002546	ENSMUST00000113377	Golga2	0.671564	0.308832	0.362732	0.668935	0.422375	0.24656	-0.116172	0.113543	60	61	3000	56	1301	52	19669	2.616	-5.55	-17.038	26	0	0	3	0	0	0	0	46.8938	8.71	5.81	3.5	3.7	0.7	13.91	11.61	3.8	2.1	2.2	12.21	6.21	2.1	1.2	4	7.41	4	0.4	1.5	4.9
ENSMUSG00000002550	ENSMUST00000002625	Uck1	0.795262	0.212976	0.582286	0.828332	0.316635	0.511697	-0.0705889	0.103659	125	65	852	56	1028	53	5158	0	-6.552	-12.545	7	0	0	0	0	0	0	2.03	43.9716	6.01	7.42	3.18	7.42	1.41	5.65	4.24	7.42	3.53	4.59	8.48	5.65	2.12	4.59	6.01	5.3	5.65	0	2.47	8.83
ENSMUSG00000002565	ENSMUST00000002640	Scin	0.443744	0.175095	0.268649	0.108141	-0.0499955	0.158136	-0.110513	-0.22509	120	66	2148	49	727	33	74456	0.737	-2.257	-15.733	16	0	2	0	0	0	0	0	32.6331	6.43	4.9	3.36	6.29	1.12	7.69	5.45	8.81	1.54	5.03	7.69	7.41	2.1	4.2	4.34	6.85	4.62	2.1	3.36	6.71
ENSMUSG00000002565	ENSMUST00000002640	Scin	0.443744	0.175095	0.268649	0.108141	-0.0499955	0.158136	-0.110513	-0.22509	120	66	2148	49	727	33	74456	0.737	-2.257	-15.733	16	0	2	0	0	0	0	0	32.6331	6.43	4.9	3.36	6.29	1.12	7.69	5.45	8.81	1.54	5.03	7.69	7.41	2.1	4.2	4.34	6.85	4.62	2.1	3.36	6.71
ENSMUSG00000002565	ENSMUST00000078481	Scin	0.443744	0.175095	0.268649	0.108141	-0.0499955	0.158136	-0.110513	-0.22509	75	67	1848	50	731	32	74415	0.737	-3.194	-15.733	14	0	2	0	0	0	0	0	34.202	6.5	4.72	2.76	6.34	0.98	7.32	5.85	8.62	1.63	5.2	7.64	7.48	2.44	4.23	4.23	6.83	4.72	2.11	3.41	6.99
ENSMUSG00000002565	ENSMUST00000078481	Scin	0.443744	0.175095	0.268649	0.108141	-0.0499955	0.158136	-0.110513	-0.22509	75	67	1848	50	731	32	74415	0.737	-3.194	-15.733	14	0	2	0	0	0	0	0	34.202	6.5	4.72	2.76	6.34	0.98	7.32	5.85	8.62	1.63	5.2	7.64	7.48	2.44	4.23	4.23	6.83	4.72	2.11	3.41	6.99
ENSMUSG00000002578	ENSMUST00000133342	Ikzf4	0.800838	0.79456	0.00627719	0.803983	0.809959	-0.00597645	-0.0122536	0.0153991	184	65	1761	57	3205	47	15149	0	-7.676	-7.617	8	0	0	3	0	0	0	0	42.906	3.41	6.66	2.9	5.29	3.58	7.17	3.58	10.07	4.61	2.9	8.7	4.44	1.88	3.41	9.22	10.24	4.27	0	2.39	5.29
ENSMUSG00000002580	ENSMUST00000002655	Mien1	0.816743	0.383078	0.433665	0.393279	0.0646992	0.32858	-0.105085	-0.318379	45	72	348	57	354	47	1284	0	-12.265	-13.125	4	0	0	0	0	0	0	0	41.2281	6.96	3.48	3.48	0.87	2.61	14.78	0.87	11.3	0.87	6.96	6.09	4.35	1.74	3.48	9.57	6.96	2.61	0	3.48	9.57
ENSMUSG00000002602	ENSMUST00000085948	Axl	0.49924	0.288137	0.211103	0.632828	0.710211	-0.077383	-0.288486	0.422074	227	65	2640	57	1032	42	31076	2.603	-7.215	-3.27	19	0	1	0	0	0	0	0	36.4465	6.71	5.92	2.62	5.01	2.39	6.94	4.32	7.85	2.39	2.84	11.15	3.3	2.16	2.5	8.53	6.48	5.92	2.39	2.62	7.96
ENSMUSG00000002603	ENSMUST00000002678	Tgfb1	0.734368	0.616014	0.118355	0.595722	0.800975	-0.205253	-0.323608	0.184961	867	65	1173	58	135	75	18076	0.991	-6.854	-25.154	7	1	0	1	0	0	0	0	44.2159	5.64	7.44	4.36	4.62	3.08	5.64	3.59	5.13	2.82	4.36	12.05	5.13	1.79	2.31	8.46	7.95	4.1	1.79	4.1	5.64
ENSMUSG00000002608	ENSMUST00000002683	Ccdc97	0.748227	0.492561	0.255666	0.73088	0.606058	0.124822	-0.130844	0.113497	122	56	1023	60	1887	56	7983	0.755	-9.926	-27.617	5	0	0	1	0	0	0	1.43	48.0826	8.53	8.53	1.76	7.94	1.18	13.53	6.76	5.88	2.35	2.35	8.82	2.35	1.18	3.82	6.47	6.47	4.12	0.59	3.24	4.12
ENSMUSG00000002617	ENSMUST00000037057	Zfp40	0.914223	0.658725	0.255498	0.837045	0.411213	0.425832	0.170334	-0.247512	360	55	2391	35	1352	35	19384	0	11.415	-2.69	6	0	3	4	0	0	0	2.22	16.9811	2.51	6.16	3.52	3.14	7.16	8.29	4.15	4.77	7.29	5.03	5.65	12.44	1.63	3.02	3.02	8.79	5.4	0.38	5.4	2.26
ENSMUSG00000002625	ENSMUST00000236503	Akap8l	0.144684	-0.159552	0.304236	0.504724	0.168701	0.336023	0.0317872	0.328253	96	64	1824	54	67	60	29171	4.078	-3.074	-7.617	15	0	0	0	0	0	0	0	43.7294	6.1	6.43	2.8	7.25	1.65	10.05	5.6	11.2	1.32	2.64	5.44	6.59	4.12	3.13	5.44	6.59	6.1	0.82	4.45	2.31
ENSMUSG00000002635	ENSMUST00000002710	Pdcd2l	0.966413	0.501007	0.465406	0.939	0.738812	0.200188	-0.265218	0.237805	18	60	1095	55	182	34	12163	0	-7.947	-1.096	7	0	1	1	0	0	0	0	36.6391	7.14	4.12	1.92	5.49	4.67	7.14	6.59	7.14	0.82	1.1	9.89	3.3	1.92	3.85	8.24	8.79	5.77	2.2	2.75	7.14
ENSMUSG00000002658	ENSMUST00000002733	Gtf2f1	0.816824	0.551014	0.26581	0.841771	0.575552	0.266219	0.000408654	0.0245381	168	53	1527	55	22	54	7884	3.144	-1.833	-13.414	13	0	1	0	0	0	0	0	52.071	7.09	7.09	3.15	7.09	0.2	12.2	4.13	5.91	0.79	1.97	5.31	12.01	2.17	2.95	5.12	10.63	5.91	0.79	1.77	3.74
ENSMUSG00000002660	ENSMUST00000002735	Clpp	0.932912	0.256988	0.675924	0.856224	0.372835	0.48339	-0.192534	0.115847	23	73	819	58	141	48	5884	0.641	-8.293	0.354	6	0	0	1	0	0	0	0	42.0664	9.56	6.25	1.84	4.04	1.84	5.51	5.15	6.62	2.57	6.99	9.56	3.31	4.04	1.47	7.72	7.72	5.15	1.1	2.94	6.62
ENSMUSG00000002661	ENSMUST00000002737	Alkbh7	0.992274	0.609788	0.382486	0.910739	0.743416	0.167322	-0.215163	0.133628	21	51	666	58	230	44	1980	0	-13.333	6.006	4	0	0	1	0	0	0	0	38.6364	6.33	10.86	0	4.98	2.26	9.5	3.17	7.69	3.62	3.62	11.76	1.81	1.81	3.17	7.24	9.5	2.26	1.81	2.26	6.33
ENSMUSG00000002668	ENSMUST00000011623	Dennd1c	0.16714	0.034044	0.133096	0.296551	0.28649	0.0100605	-0.123035	0.252446	104	64	2361	55	56	40	12456	0	-4.312	-11.096	24	0	0	0	0	0	0	0	37.3248	6.49	6.23	2.93	5.09	2.8	6.49	6.62	5.73	1.91	2.42	13.1	3.56	1.27	4.2	9.29	10.43	3.82	0.89	1.27	5.47
ENSMUSG00000002679	ENSMUST00000161211	Med6	0.933722	0.737783	0.195939	0.941839	0.800992	0.140847	-0.0550922	0.0632093	45	48	741	44	273	39	21450	0.884	2.376	-22.835	8	0	0	0	0	0	0	0	24.0816	5.69	6.1	3.25	4.88	0.81	7.72	7.72	3.66	2.44	7.32	7.32	7.72	2.03	3.25	6.91	7.72	2.85	1.63	3.66	7.32
ENSMUSG00000002699	ENSMUST00000052413	Lcp2	0.830716	0.691141	0.139575	0.836754	0.671907	0.164847	0.0252716	-0.0192342	434	51	1602	50	1608	40	45376	0	2.409	8.614	21	1	1	1	0	0	0	5.38	35.5263	4.5	7.32	6	7.13	0.56	7.5	3.75	4.88	2.25	3.38	9.01	5.63	1.5	3.38	13.7	8.82	3.56	0.56	3.19	3.38
ENSMUSG00000002718	ENSMUST00000002790	Cse1l	0.913345	0.54411	0.369235	0.885852	0.451026	0.434826	0.0655909	-0.0930838	129	61	2916	41	596	36	40331	0.508	4.768	-0.081	25	0	6	2	0	0	0	1.31	21.4433	7.31	3.4	5.56	4.43	1.44	7.52	4.63	3.19	2.47	7.42	13.08	5.97	2.16	5.66	4.74	6.18	5.56	0.82	2.99	5.46
ENSMUSG00000002728	ENSMUST00000110000	Naa20	0.93324	0.721618	0.211621	0.924973	0.667594	0.257379	0.045758	-0.0540243	69	78	537	46	536	33	13185	0	2.214	-36.878	6	0	0	1	0	0	0	0	25.4237	7.87	6.18	3.37	5.06	0.56	10.11	1.69	6.74	2.25	5.06	9.55	3.93	3.37	5.06	5.62	5.06	4.49	1.12	6.18	6.74
ENSMUSG00000002731	ENSMUST00000002808	Prkra	0.690077	0.0515393	0.638538	0.82207	0.388825	0.433245	-0.205293	0.337286	159	64	942	48	513	39	18118	0	1.461	-0.081	8	0	1	1	0	0	0	0	35.5769	8.31	4.15	5.11	2.56	2.56	7.03	4.47	6.71	4.15	6.71	9.27	7.03	1.6	2.56	5.75	8.95	6.39	0.64	2.56	3.51
ENSMUSG00000002732	ENSMUST00000002809	Fkbp7	0.899874	0.464504	0.43537	0.801828	1	-0.198172	-0.633542	0.535496	56	60	657	43	147	27	10027	0	5.598	-5.299	4	0	1	0	0	0	0	0	26.7281	5.5	3.67	4.13	7.8	2.29	8.72	3.67	6.88	3.21	5.5	8.26	10.09	2.29	4.59	4.59	5.5	3.67	0.92	4.13	4.59
ENSMUSG00000002733	ENSMUST00000111920	Plekha3	0.628298	0.601241	0.0270568	0.46952	0.593634	-0.124114	-0.151171	-0.00760726	314	78	894	49	1326	35	21548	0.501	0.914	-23.414	8	0	0	7	0	0	0	7.2	32.0946	6.06	5.72	3.7	4.71	3.37	8.42	3.7	3.37	3.03	3.7	8.75	5.72	3.7	2.36	7.41	11.45	6.06	1.35	2.36	5.05
ENSMUSG00000002741	ENSMUST00000002818	Ykt6	0.845532	0.651108	0.194424	0.705015	0.428969	0.276046	0.0816213	-0.222138	208	72	597	49	1736	50	12088	0	-1.04	-14.864	7	0	0	0	0	0	4	0	29.9492	6.57	4.55	1.52	6.57	1.52	7.07	5.05	4.04	1.52	3.54	10.1	8.08	2.53	4.04	3.03	12.12	4.55	0.51	4.55	8.59
ENSMUSG00000002748	ENSMUST00000002825	Baz1b	0.648961	0.153592	0.495368	0.722383	0.331761	0.390621	-0.104747	0.178169	386	71	4440	48	1666	50	58866	3.459	1.067	-30.951	19	0	3	4	0	0	0	2.78	34.7091	5.68	7.64	3.45	5.21	1.96	11.7	3.79	4.67	2.57	3.11	10.28	10.89	2.1	2.57	5.27	7.1	3.72	1.08	2.23	5
ENSMUSG00000002763	ENSMUST00000002840	Pex6	0.31385	0.190801	0.123049	0.517103	0.447956	0.0691477	-0.0539013	0.257154	37	51	2946	62	217	60	14079	0	-14.389	-1.82	17	0	0	0	0	0	0	0	41.0204	10.19	7.85	1.22	4.08	2.14	6.01	3.98	8.87	2.04	1.73	16.21	2.14	0.82	2.45	8.56	7.54	4.79	0.82	0.92	7.65
ENSMUSG00000002767	ENSMUST00000113430	Mrpl2	0.964844	0.652714	0.31213	0.948454	0.655241	0.293214	-0.0189165	0.002527	33	84	915	56	43	31	3870	0	-6.942	-21.82	7	0	0	0	0	0	0	0	40.264	10.86	9.54	4.61	2.3	1.32	3.29	3.62	8.88	2.3	4.93	8.22	6.58	2.63	1.32	6.58	7.24	4.28	1.64	1.97	7.89
ENSMUSG00000002768	ENSMUST00000233430	Mea1	0.893267	0.0170981	0.876169	0.801705	0.239525	0.56218	-0.313989	0.222427	188	68	525	57	232	52	2117	1.153	-6.634	-11.965	4	0	0	0	0	0	0	0	34.104	11.49	2.87	1.15	7.47	0	14.37	6.9	9.77	2.3	2.87	6.9	1.72	2.3	0.57	10.34	6.32	3.45	2.3	1.15	5.75
ENSMUSG00000002769	ENSMUST00000002846	Gnmt	1	0.81703	0.18297	0.239415	-0.298231	0.537646	0.354676	-1.11526	17	82	882	56	136	52	3505	0	-10.494	4.557	6	0	0	0	0	0	0	0	44.5205	7.17	5.8	3.07	7.85	2.73	3.75	2.39	8.53	3.07	3.41	9.9	5.8	2.05	3.41	4.1	6.83	5.12	1.71	5.12	8.19
ENSMUSG00000002771	ENSMUST00000211713	Grin2d	-1.3807	-1.30445	-0.0762492	0.730095	0.772016	-0.0419216	0.0343276	2.07647	745	63	3972	67	527	61	38177	0	-17.177	-30.661	13	0	0	0	1	0	0	0	48.8654	11.19	7.86	1.81	4.16	1.81	4.99	2.27	9.75	2.65	2.72	9.67	2.19	1.66	3.85	11.41	6.8	3.85	2.27	2.72	6.35
ENSMUSG00000002778	ENSMUST00000002855	Kdelr1	0.749263	0.719275	0.0299874	0.805346	0.794086	0.01126	-0.0187275	0.0748112	239	69	639	50	721	48	10961	0.696	-0.434	8.18	5	0	0	1	0	0	1	0	27.0142	6.6	2.83	2.83	3.3	1.89	2.83	1.42	4.25	2.36	7.55	15.09	5.19	1.89	9.43	1.89	6.13	7.55	2.36	6.6	8.02
ENSMUSG00000002781	ENSMUST00000069772	Tmem143	0.781513	-1.2523	2.03382	0.674803	0.439133	0.235669	-1.79815	1.69144	138	53	1377	59	782	54	20473	0	-10.734	-3.994	8	0	0	1	0	0	3	6.63	40.2626	9.17	6.99	2.18	3.06	0.66	6.11	5.9	5.02	2.84	1.97	16.16	3.93	2.4	4.15	6.77	7.86	3.71	1.97	2.4	6.77
ENSMUSG00000002797	ENSMUST00000204301	Ggct	0.785413	0.510225	0.275188	0.395341	0.107677	0.287664	0.0124764	-0.402549	26	61	234	56	171	42	6930	0	-6.976	2.238	4	0	0	0	0	0	0	0	48.6842	6.49	5.19	3.9	3.9	3.9	9.09	3.9	10.39	3.9	1.3	10.39	6.49	3.9	7.79	1.3	7.79	2.6	1.3	2.6	3.9
ENSMUSG00000002799	ENSMUST00000075827	Jag2	-0.865967	-0.469719	-0.396249	-1.86779	-0.854514	-1.01327	-0.617026	-0.384795	292	85	3744	62	1070	53	21958	0	-11.397	-60.081	26	0	0	1	0	0	0	0	45.9872	6.34	6.5	4.65	6.34	10.59	5.37	2.81	11.63	2.65	2.89	6.26	2.73	0.8	2.81	7.22	6.5	4.17	2.17	2.49	5.13
ENSMUSG00000002803	ENSMUST00000002880	Btbd6	0.886236	0.655391	0.230845	0.868395	0.658928	0.209467	-0.0213783	0.00353663	43	81	1620	57	394	48	2368	0	-9.084	-36.168	4	0	0	1	0	0	0	0	42.5651	12.8	5.19	3.71	3.34	2.6	7.24	3.9	5.38	1.86	3.34	10.76	4.08	1.86	4.64	6.86	6.31	5.01	1.11	3.15	6.86
ENSMUSG00000002804	ENSMUST00000221497	Nudt14	-0.0682076	-0.251613	0.183406	0.425304	0.345822	0.0794816	-0.103924	0.597435	39	66	201	56	115	60	7186	0	-11.152	-10.516	4	0	0	0	0	0	0	0	38.4615	3.03	9.09	1.52	6.06	1.52	3.03	4.55	6.06	4.55	3.03	10.61	4.55	4.55	6.06	4.55	9.09	4.55	1.52	3.03	9.09
ENSMUSG00000002808	ENSMUST00000002885	Epdr1									242	64	675	56	1446	41	28099	0	-10.645	-16.748	3	0	0	3	0	0	0	0	40.3587	5.36	6.7	2.23	4.46	3.13	5.36	9.38	7.14	0.45	4.46	8.93	3.57	2.23	3.13	7.14	6.7	5.36	3.13	4.02	7.14
ENSMUSG00000002812	ENSMUST00000002889	Flii	0.665781	-0.00524463	0.671025	0.719228	0.213229	0.506	-0.165026	0.218474	74	79	3816	55	170	45	13121	3.754	-5.148	-19.646	30	0	1	0	0	0	0	0	41.9685	6.22	5.82	4.88	5.59	1.97	8.26	4.88	5.74	1.97	3.46	12.82	6.29	1.97	4.17	4.72	5.98	4.96	1.65	2.83	5.82
ENSMUSG00000002814	ENSMUST00000120417	Top3a	0.789354	0.257297	0.532057	0.790853	0.601653	0.1892	-0.342856	0.344355	238	58	2013	50	67	44	35031	0.538	-1.856	-29.067	18	1	1	0	0	0	0	0	34.6786	7.01	6.27	2.54	5.22	2.99	8.21	5.37	5.37	3.28	5.07	9.25	6.87	2.69	4.63	4.78	4.03	5.37	0.9	3.43	6.72
ENSMUSG00000002820	ENSMUST00000065005	Atg4d	0.83031	0.767597	0.0627131	0.847647	0.696162	0.151486	0.0887727	-0.0714349	190	69	1425	59	4336	51	12480	0.748	-10.466	-23.125	10	0	0	5	0	0	0	3.73	38.6892	6.54	8.65	1.27	5.27	3.38	4.85	3.16	8.23	2.53	1.9	9.7	3.8	2.32	4.22	7.38	10.13	4.43	2.53	2.95	6.75
ENSMUSG00000002825	ENSMUST00000002902	Qtrt1	0.819022	-0.18577	1.00479	0.659483	0.143251	0.516232	-0.48856	0.329021	18	54	1212	57	86	36	8438	0	-8.317	-11.661	10	0	0	0	0	0	0	0	40.2985	7.94	5.71	2.73	4.22	2.98	4.71	3.72	8.19	3.97	3.72	11.41	3.47	3.97	3.72	5.71	7.44	6.7	0.99	1.99	6.7
ENSMUSG00000002833	ENSMUST00000226053	Hdgfl2	0.214938	-0.310884	0.525823	0.641219	0.314253	0.326966	-0.198857	0.625137	121	74	2010	57	139	48	20959	1.848	-5.069	-6.603	16	0	0	0	0	0	0	0	48.6527	7.03	9.72	2.39	8.07	0.45	11.66	2.84	6.28	1.2	1.2	5.08	10.91	0.9	1.49	8.52	12.41	3.59	0.45	1.05	4.78
ENSMUSG00000002835	ENSMUST00000002914	Chaf1a	0.794227	0.441352	0.352875	0.862784	0.727271	0.135514	-0.217362	0.285919	73	87	2736	55	2726	52	29838	1.429	-4.866	-27.762	14	0	1	2	0	0	0	0	44.8352	6.37	6.48	1.65	6.81	2.74	11.86	4.06	5.38	2.31	3.18	8.56	8.34	1.65	2.41	7.35	8.45	5.16	0.99	0.77	5.49
ENSMUSG00000002844	ENSMUST00000002923	Adprh	0.890911	0.347161	0.54375	0.873914	0.4483	0.425614	-0.118136	0.101138	217	71	1089	57	1660	46	8674	1.458	-8.153	-22.11	4	0	0	1	0	0	0	0	40.7202	10.5	4.97	2.49	6.08	1.38	6.08	3.87	11.33	3.31	3.59	9.39	3.87	4.14	3.59	4.7	6.35	2.49	2.76	4.97	4.14
ENSMUSG00000002845	ENSMUST00000002924	Tmem39a	0.893862	0.625447	0.268415	0.894113	0.667679	0.226434	-0.0419816	0.0422321	393	59	1461	49	1017	40	29351	0	0.932	-6.893	9	0	1	1	0	0	0	14.18	26.8041	6.79	5.56	4.94	2.47	2.67	3.09	3.09	4.53	3.91	4.94	15.64	2.88	1.44	5.56	5.35	7.61	4.32	2.26	5.76	7.2
ENSMUSG00000002846	ENSMUST00000002925	Timmdc1	0.585608	0.177391	0.408217	0.72857	0.451614	0.276956	-0.13126	0.274223	129	68	858	53	586	42	24317	1.237	-4.97	-25.588	7	0	3	2	0	0	0	1.8	33.8028	10.88	8.77	2.11	3.16	0.35	7.37	5.26	9.47	2.11	5.96	7.72	3.51	1.75	4.21	5.26	7.72	3.16	2.81	3.16	5.26
ENSMUSG00000002847	ENSMUST00000002926	Pla1a									269	42	1371	52	334	43	37029	0	-3.311	-7.183	11	2	0	1	0	0	0	10.1	32.3077	6.36	3.95	3.51	4.39	3.29	4.61	3.51	8.11	2.63	5.48	10.31	5.04	1.32	4.82	6.36	7.68	5.26	1.54	2.85	8.99
ENSMUSG00000002870	ENSMUST00000058011	Mcm2	0.833513	0.148502	0.685011	0.731549	0.322431	0.409118	-0.275893	0.173929	130	62	2715	56	526	47	15307	1.657	-5.532	-7.328	16	0	1	1	0	0	0	0	44.8505	7.08	7.96	3.76	6.75	1.33	9.18	3.98	6.08	2.77	5.86	8.85	4.87	3.21	3.32	4.54	7.19	4.09	0.22	2.65	6.31
ENSMUSG00000002871	ENSMUST00000055022	Tpra1	0.742596	0.126612	0.615983	0.856297	0.640817	0.21548	-0.400503	0.514205	426	63	1110	55	284	52	9981	0	-5.779	-17.617	12	0	0	0	0	0	0	2.68	34.5109	10.3	4.07	2.44	3.52	2.17	4.34	2.17	5.15	1.63	7.59	13.28	2.71	1.08	6.5	4.88	10.3	4.88	1.63	4.07	7.32
ENSMUSG00000002881	ENSMUST00000069792	Nab1	0.839098	0.673228	0.16587	0.615758	0.459443	0.156315	-0.00955509	-0.213785	489	80	1461	50	1924	35	43386	0.876	-1.663	-18.342	8	0	1	6	0	0	0	6.89	34.6392	8.02	6.17	2.06	4.73	1.65	9.26	5.76	6.17	2.67	3.29	11.93	6.58	1.65	2.47	5.35	10.7	4.12	0.62	2.67	4.12
ENSMUSG00000002885	ENSMUST00000075843	Adgre5	0.607534	0.364551	0.242983	0.644623	0.36691	0.277714	0.034731	0.00235873	32	75	2457	52	511	52	17808	0.466	-3.02	-1.53	20	0	0	0	0	0	0	0	32.8029	4.65	3.18	5.38	2.44	5.38	5.5	3.91	7.21	2.57	4.4	11.49	4.77	2.32	4.65	4.52	8.68	7.82	2.08	2.08	6.97
ENSMUSG00000002897	ENSMUST00000002976	Il17ra	0.866239	0.596274	0.269965	0.844647	0.565196	0.279451	0.00948638	-0.0310782	82	76	2595	56	5075	49	24313	2.83	-6.872	-27.472	13	0	0	6	0	0	1	0	37.6593	4.51	4.98	2.78	5.32	3.24	7.99	5.67	4.4	3.01	3.94	11.92	3.24	2.08	3.59	8.45	8.1	4.28	2.55	1.62	8.33
ENSMUSG00000002900	ENSMUST00000002979	Lamb1									128	65	5505	51	151	40	64352	0	-3.029	-12.835	33	0	0	1	0	0	0	0	35.1337	6.87	4.85	4.09	6.76	6.98	8.12	4.91	7.47	2.02	3.87	7.85	5.13	1.47	3.05	5.13	6.76	5.18	0.76	3.16	5.56
ENSMUSG00000002908	ENSMUST00000212611	Kcnn1									501	66	1617	59	410	54	19353	0	-9.969	-24.139	11	0	0	1	0	0	0	0	41.1546	8.36	5.76	1.86	2.97	1.86	6.51	4.65	7.43	3.35	4.46	12.27	4.46	2.6	3.16	5.2	7.06	5.95	2.04	1.86	8.18
ENSMUSG00000002910	ENSMUST00000002989	Arrdc2	0.913653	0.174676	0.738978	0.927978	0.467357	0.460621	-0.278357	0.292682	319	58	1224	64	812	50	4592	0	-13.275	-7.038	8	0	0	0	0	0	0	0	43.5961	10.07	9.09	1.23	3.44	2.21	5.9	2.95	7.62	1.97	3.44	9.09	2.95	1.23	3.44	8.85	8.35	5.16	1.23	2.46	9.34
ENSMUSG00000002944	ENSMUST00000082367	Cd36	0.734853	1	-0.265147						263	43	1419	41	1334	32	53681	0	6.027	1.513	15	0	0	4	0	0	0	8.22	18.6837	5.72	3.39	5.3	4.87	2.12	5.08	2.54	6.78	1.48	6.99	7.84	7.84	2.12	5.51	5.72	6.57	5.51	1.06	4.24	9.32
ENSMUSG00000002944	ENSMUST00000082367	Cd36	0.734853	1	-0.265147						263	43	1419	41	1334	32	53681	0	6.027	1.513	15	0	0	4	0	0	0	8.22	18.6837	5.72	3.39	5.3	4.87	2.12	5.08	2.54	6.78	1.48	6.99	7.84	7.84	2.12	5.51	5.72	6.57	5.51	1.06	4.24	9.32
ENSMUSG00000002944	ENSMUST00000169095	Cd36	0.734853	1	-0.265147						275	43	1419	41	983	32	106381	0	6.027	1.513	16	0	0	2	0	0	0	8.22	18.6837	5.72	3.39	5.3	4.87	2.12	5.08	2.54	6.78	1.48	6.99	7.84	7.84	2.12	5.51	5.72	6.57	5.51	1.06	4.24	9.32
ENSMUSG00000002944	ENSMUST00000169095	Cd36	0.734853	1	-0.265147						275	43	1419	41	983	32	106381	0	6.027	1.513	16	0	0	2	0	0	0	8.22	18.6837	5.72	3.39	5.3	4.87	2.12	5.08	2.54	6.78	1.48	6.99	7.84	7.84	2.12	5.51	5.72	6.57	5.51	1.06	4.24	9.32
ENSMUSG00000002948	ENSMUST00000003027	Map2k7	0.694728	0.328387	0.366341	0.704467	0.375937	0.32853	-0.0378114	0.04755	81	73	1407	55	138	48	9069	1.417	-3.472	-21.414	13	0	0	0	0	0	0	0	41.97	5.77	6.41	2.35	5.13	1.71	6.41	4.7	6.2	2.56	6.2	9.4	7.48	3.21	3.42	8.12	8.33	4.91	0.85	2.14	4.7
ENSMUSG00000002949	ENSMUST00000003029	Timm44	0.799869	0.252892	0.546978	0.882753	0.559055	0.323698	-0.22328	0.306163	26	56	1359	51	405	50	16183	0.478	-2.222	-3.704	13	0	0	0	0	0	0	0	41.2417	7.3	5.75	2.65	5.75	1.33	9.29	4.42	6.19	1.55	4.87	9.73	9.96	2.43	3.76	2.43	8.85	4.2	1.33	2.43	5.75
ENSMUSG00000002957	ENSMUST00000003038	Ap2a2	0.475331	0.0338232	0.441508	0.62336	0.220093	0.403267	-0.0382409	0.18627	187	79	2817	52	1642	51	70839	0.34	-1.777	-13.994	22	0	2	1	0	0	0	0	36.7129	8	4.69	5.12	4.8	1.71	5.97	4.8	4.9	1.71	5.86	11.73	5.65	1.6	4.26	5.12	7.57	5.86	0.53	2.67	7.46
ENSMUSG00000002963	ENSMUST00000003044	Pnkp	0.642785	0.0153754	0.627409	0.802241	0.394502	0.407739	-0.219671	0.379127	245	53	1569	56	370	51	5834	0.339	-9.517	-5.733	16	0	0	0	0	0	0	8.45	39.9232	7.28	6.13	2.87	4.6	1.53	6.32	4.79	8.43	1.34	3.07	10.54	5.17	1.15	4.79	8.62	7.66	4.6	1.53	1.72	7.85
ENSMUSG00000002968	ENSMUST00000003049	Med25	0.610505	0.354704	0.2558	0.686396	0.6885	-0.0021038	-0.257904	0.333795	348	57	2238	62	33	36	13329	0	-11.657	-32.255	18	1	0	0	0	0	0	0	43.5484	9.8	3.09	2.82	2.01	1.21	3.62	9.26	9.93	1.88	2.82	11.14	3.22	1.88	2.68	14.9	6.44	4.3	0.67	1.88	6.44
ENSMUSG00000002980	ENSMUST00000003061	Bcam	0.624528	0.4313	0.193227	0.536265	0.358073	0.178192	-0.0150348	-0.0732275	77	73	1869	59	483	62	14417	0	-9.181	-18.052	15	0	0	0	0	0	0	0	39.9356	6.75	6.43	2.57	4.02	2.25	7.56	3.86	9.81	3.05	1.45	9.16	3.05	1.77	3.22	6.59	8.84	6.43	1.45	2.57	9.16
ENSMUSG00000002981	ENSMUST00000055242	Clptm1	0.742315	0.363727	0.378589	0.647149	0.331958	0.31519	-0.0633982	-0.0317684	28	81	1995	54	2120	53	33463	1.148	-2.61	-28.762	14	0	0	5	0	0	0	0	37.4057	7.53	4.37	3.46	5.87	0.9	4.52	4.37	5.57	2.26	5.57	8.28	4.52	1.96	5.87	6.33	8.28	5.12	2.71	4.97	7.53
ENSMUSG00000002983	ENSMUST00000094762	Relb	0.701994	0.278862	0.423131	0.823668	0.607054	0.216613	-0.206518	0.328192	196	79	1677	60	336	50	23222	1.58	-11.573	-18.197	12	0	0	0	0	0	0	0	43.2675	6.45	6.27	1.97	6.09	2.33	6.63	2.69	8.78	2.33	3.76	10.22	3.94	1.25	3.41	10.04	10.04	4.48	0.72	2.15	6.45
ENSMUSG00000002984	ENSMUST00000093552	Tomm40	0.709662	0.16822	0.541442	0.699474	0.436754	0.26272	-0.278722	0.268534	86	74	1086	60	405	56	14126	0	-10.725	-18.487	10	0	0	0	0	0	0	0	45.2778	7.76	2.77	4.43	2.49	1.94	4.16	4.16	12.19	2.49	1.94	11.08	4.16	1.94	4.16	8.59	8.03	7.48	0.83	2.49	6.93
ENSMUSG00000002984	ENSMUST00000093552	Tomm40	0.709662	0.16822	0.541442	0.699474	0.436754	0.26272	-0.278722	0.268534	86	74	1086	60	405	56	14126	0	-10.725	-18.487	10	0	0	0	0	0	0	0	45.2778	7.76	2.77	4.43	2.49	1.94	4.16	4.16	12.19	2.49	1.94	11.08	4.16	1.94	4.16	8.59	8.03	7.48	0.83	2.49	6.93
ENSMUSG00000002984	ENSMUST00000032555	Tomm40	0.709662	0.16822	0.541442	0.699474	0.436754	0.26272	-0.278722	0.268534	171	69	1086	60	389	57	14097	0	-10.725	1.658	9	0	0	0	0	0	0	0	45.2778	7.76	2.77	4.43	2.49	1.94	4.16	4.16	12.19	2.49	1.94	11.08	4.16	1.94	4.16	8.59	8.03	7.48	0.83	2.49	6.93
ENSMUSG00000002984	ENSMUST00000032555	Tomm40	0.709662	0.16822	0.541442	0.699474	0.436754	0.26272	-0.278722	0.268534	171	69	1086	60	389	57	14097	0	-10.725	1.658	9	0	0	0	0	0	0	0	45.2778	7.76	2.77	4.43	2.49	1.94	4.16	4.16	12.19	2.49	1.94	11.08	4.16	1.94	4.16	8.59	8.03	7.48	0.83	2.49	6.93
ENSMUSG00000002985	ENSMUST00000174355	Apoe	0.53599	0.192293	0.343697	0.0643242	0.22518	-0.160855	-0.504552	0.0328862	60	55	936	61	108	53	2737	1.247	-11.218	-10.371	4	0	0	0	0	0	0	0	49.6774	10.29	10.61	2.89	3.86	0.32	12.54	9.65	5.79	1.29	2.89	10.93	3.86	3.54	1.29	2.57	2.89	5.14	2.25	1.29	6.11
ENSMUSG00000002992	ENSMUST00000142352	Apoc2									251	58	294	54	182	55	6363	0	-9.583	-14.284	5	0	0	0	0	0	0	6.22	38.5417	7.22	3.09	2.06	6.19	0	5.15	5.15	8.25	0	3.09	16.49	5.15	5.15	4.12	1.03	11.34	6.19	1.03	5.15	4.12
ENSMUSG00000002996	ENSMUST00000175686	Hbp1	0.9302	0.609364	0.320835	0.901193	0.510628	0.390565	0.0697299	-0.0987364	7	42	1128	45	180	36	16776	0.006	-0.814	10.499	9	0	1	0	0	0	0	0	23.5294	4.27	2.93	4.53	7.2	3.73	7.73	4	5.33	4.8	3.2	8	4.27	2.4	3.47	6.93	12.53	4.27	2.4	2.67	5.33
ENSMUSG00000002997	ENSMUST00000036497	Prkar2b	0.459193	-0.0416979	0.500891	0.403089	-0.313988	0.717078	0.216186	-0.27229	214	78	1251	50	1913	35	102821	0.359	-3.534	-13.559	11	0	1	7	0	0	0	2.46	36.1446	9.86	6.49	4.57	6.25	1.68	10.34	3.61	8.41	1.44	5.77	7.21	5.29	2.64	5.05	3.37	4.09	4.57	0.48	2.16	6.73
ENSMUSG00000003031	ENSMUST00000067327	Cdkn1b	0.925111	0.890456	0.0346548	0.893708	0.848142	0.0455655	0.0109107	-0.0423137	519	60	594	57	3439	37	5113	3.066	-7.388	-4.864	2	0	0	10	0	0	0	0	51.5306	7.11	9.64	6.09	5.58	2.03	9.64	6.6	5.58	2.54	0.51	5.58	5.08	2.54	2.03	9.14	10.15	2.54	1.02	1.52	5.08
ENSMUSG00000003032	ENSMUST00000107619	Klf4	0.877707	0.863982	0.0137242	0.908444	0.829813	0.0786314	0.0649072	-0.0341694	595	61	1452	62	982	37	5324	0	-8.511	-5.154	5	0	0	1	0	0	0	2.93	49.5851	8.07	6.42	2.48	4.35	2.48	4.55	2.9	8.28	4.35	1.24	8.9	3.73	1.66	3.11	12.84	11.59	6.21	0.83	2.48	3.52
ENSMUSG00000003033	ENSMUST00000003117	Ap1m1	0.726906	0.0784351	0.64847	0.789693	0.567669	0.222024	-0.426447	0.489234	184	66	1272	52	628	56	17368	0.792	-5.014	-2.98	12	0	0	0	0	0	0	2.62	39.3365	3.78	5.2	4.49	4.02	0.71	8.98	2.6	5.67	2.36	6.62	8.27	7.57	2.84	4.96	4.73	8.27	4.02	1.42	4.02	9.46
ENSMUSG00000003037	ENSMUST00000003121	Rab8a	0.92683	0.502289	0.424541	0.875736	0.291606	0.58413	0.159589	-0.210683	159	68	624	49	3767	47	22705	3.186	1.294	-4.429	8	0	0	3	1	0	0	4.65	41.7476	6.28	6.28	5.31	6.76	1.45	6.28	2.9	6.76	0.97	9.18	7.25	9.66	2.9	6.28	0.48	6.28	6.76	0.97	2.9	4.35
ENSMUSG00000003038	ENSMUST00000102553	Hmgn2	0.650433	0.479428	0.171005	0.346929	0.365962	-0.0190333	-0.190038	-0.113466	192	65	273	51	800	38	3264	0.825	2.094	-12.4	6	0	0	0	0	0	0	0	43.8202	17.78	4.44	3.33	8.89	0	6.67	3.33	10	0	0	1.11	24.44	1.11	0	12.22	2.22	2.22	0	0	2.22
ENSMUSG00000003039	ENSMUST00000003123	Fam32a	0.925947	0.699556	0.226391	0.809388	0.534599	0.274789	0.0483984	-0.164957	57	60	339	54	2168	45	4689	0.633	3.886	-6.893	4	0	0	4	0	0	0	0	57.6577	7.14	7.14	0.89	5.36	0.89	10.71	5.36	3.57	2.68	1.79	7.14	21.43	4.46	1.79	2.68	3.57	6.25	0.89	1.79	4.46
ENSMUSG00000003062	ENSMUST00000039694	Stard3nl	0.81597	0.405045	0.410925	0.584621	0.381654	0.202968	-0.207957	-0.0233917	150	73	708	46	469	38	38120	0	0.88	-13.125	9	0	0	1	0	0	0	0	26.4957	8.09	4.26	2.98	3.4	0.85	10.21	2.98	4.68	2.55	7.23	14.04	4.26	1.28	6.38	3.4	8.09	4.26	2.13	3.4	5.53
ENSMUSG00000003068	ENSMUST00000003152	Stk11	0.661415	0.191586	0.469829	0.704634	0.516126	0.188508	-0.281321	0.32454	815	64	1311	58	440	53	14880	1.632	-7.188	-5.009	10	0	0	1	1	0	0	10.61	47.5862	4.36	6.42	3.21	5.96	2.29	8.03	4.36	7.8	2.29	5.73	9.86	6.88	2.52	3.44	6.42	5.5	4.36	0.69	3.21	6.65
ENSMUSG00000003070	ENSMUST00000003154	Efna2									281	83	630	63	1220	49	10529	0	-9.166	-33.994	4	0	0	4	0	0	0	0	45.1923	7.18	8.13	4.78	3.35	2.87	5.74	1.91	7.66	2.39	2.39	11.96	1.91	1.44	4.78	10.53	6.22	3.83	1.44	6.22	5.26
ENSMUSG00000003072	ENSMUST00000105367	Atp5d	0.418276	0.308785	0.109491	0.431736	0.437699	-0.00596284	-0.115454	0.128914	635	57	507	60	268	56	4357	0	-12.739	6.006	5	2	0	0	0	0	0	17.6	43.7126	17.26	4.76	2.38	4.17	0	6.55	4.76	5.95	1.79	2.38	11.9	2.38	2.38	3.57	5.36	7.14	7.14	0	1.19	8.93
ENSMUSG00000003099	ENSMUST00000003183	Ppp5c	0.367009	0.0607513	0.306257	0.460846	0.490603	-0.0297566	-0.336014	0.429851	103	72	1500	54	469	56	23277	0	-1.94	-25.299	13	0	1	1	0	0	0	0	45.7831	7.01	4.81	4.41	6.41	2.2	7.82	4.41	6.81	2.4	4.61	8.62	7.62	3.01	4.41	4.21	4.61	5.01	0.6	5.41	5.61
ENSMUSG00000003119	ENSMUST00000107538	Cdk12	0.712053	0.613671	0.0983819	0.618242	0.564914	0.0533281	-0.0450538	-0.0487572	33	60	4455	49	655	37	47710	3.35	1.604	-8.632	14	0	3	2	0	1	0	0	30.9508	5.12	6.67	2.76	4.92	0.88	6.6	4.78	5.86	2.76	2.96	8.83	8.09	1.42	1.62	11.12	12.8	5.59	0.54	2.43	4.25
ENSMUSG00000003123	ENSMUST00000003207	Lipe	0.738675	0.0805038	0.658171	0.929006	0.267036	0.66197	0.00379834	0.186532	770	55	2409	57	434	54	16853	0	-5.969	-6.748	10	0	1	1	0	0	0	0	38.0774	9.35	7.23	2.49	4.11	1.62	6.11	3.37	6.36	2.62	2.74	12.72	3.37	2.37	4.61	7.11	9.48	5.74	0.75	2	5.86
ENSMUSG00000003131	ENSMUST00000172450	Pafah1b2	0.914923	0.738206	0.176716	0.824346	0.626169	0.198177	0.0214609	-0.112038	354	66	690	48	5829	40	22193	2.02	-0.647	-6.168	6	0	0	13	0	0	0	0	32.0175	6.11	3.49	5.68	6.11	1.31	6.99	6.11	7.86	3.93	6.99	11.35	6.11	2.62	3.06	5.24	3.49	3.93	1.75	0.87	6.99
ENSMUSG00000003134	ENSMUST00000054462	Tbc1d8	0.417938	0.578295	-0.160356	0.53895	0.699394	-0.160445	-8.82245e-05	0.121099	189	77	3405	53	857	41	107264	0	-4.628	-21.82	20	0	2	3	0	0	0	2.57	39.8058	6.17	5.82	3.26	5.73	2.29	9.17	4.67	3.88	3	4.85	12.35	5.2	2.12	5.03	5.11	7.76	3.88	1.32	2.56	5.82
ENSMUSG00000003135	ENSMUST00000003219	Cnot11	0.931294	0.781084	0.15021	0.831104	0.671501	0.159603	0.00939319	-0.109582	37	75	1518	56	1607	43	11072	0	-6.164	-11.386	7	0	2	5	0	0	2	0	40.6746	7.72	5.15	2.77	3.76	1.19	6.53	4.16	7.13	1.98	5.54	12.28	4.16	2.97	4.55	9.31	10.3	4.36	0.59	1.39	4.16
ENSMUSG00000003153	ENSMUST00000032476	Slc2a3	0.811458	0.587799	0.223659	0.726477	0.507428	0.21905	-0.00460941	-0.0803711	355	51	1482	52	2122	46	14937	0.755	-3.515	-0.661	10	0	0	4	0	0	0	8.07	32.7236	8.32	3.25	3.04	2.03	1.83	5.88	3.65	9.53	0.41	8.72	11.97	2.64	2.84	7.91	4.67	6.09	5.48	1.01	2.23	8.52
ENSMUSG00000003154	ENSMUST00000177927	Foxj2	0.718662	0.60622	0.112442	0.793066	0.698761	0.0943048	-0.0181375	0.0925415	433	61	1698	58	2489	47	24831	1.192	-1.018	-7.183	12	0	1	3	0	0	0	2.91	42.9078	6.73	3.72	4.6	5.13	1.42	3.72	8.5	7.96	4.25	3.36	5.84	3.36	2.3	2.3	12.92	11.86	4.78	1.59	3.54	2.12
ENSMUSG00000003161	ENSMUST00000088786	Sri	0.645387	0.15373	0.491657	0.548467	0.057307	0.49116	-0.000497068	-0.096423	132	45	552	49	1820	36	23302	0.727	-3.419	-5.588	8	0	0	1	0	0	0	0	29.1209	6.56	6.01	2.73	8.2	2.73	2.73	7.65	10.38	0.55	3.28	7.1	3.28	3.83	6.56	3.83	7.1	6.56	1.09	3.83	6.01
ENSMUSG00000003166	ENSMUST00000012152	Dgcr2	0.712617	0.661461	0.0511557	0.758319	0.711381	0.0469385	-0.00421713	0.0499196	229	72	1650	56	2166	51	51339	0	-5.795	-17.762	10	0	0	0	0	0	0	3.12	37.0438	6.38	5.83	2.19	7.83	4.37	6.01	4.01	7.83	3.46	2.19	8.93	2.73	1.46	5.28	9.65	7.65	4.74	1.64	2.73	5.1
ENSMUSG00000003184	ENSMUST00000003284	Irf3	0.576565	0.312079	0.264486	0.609191	0.541355	0.0678363	-0.19665	0.229276	269	52	1260	57	502	54	5201	0	-9.656	-6.313	8	0	0	0	0	0	0	1.58	41.6268	6.92	4.53	3.1	7.16	0.95	5.73	5.97	8.11	2.15	2.15	12.17	5.25	2.15	4.53	7.64	6.21	4.06	3.1	1.91	6.21
ENSMUSG00000003190	ENSMUST00000003290	Bcl2l12	0.320589	-0.362207	0.682796	0.80126	0.490393	0.310867	-0.371929	0.8526	125	57	768	62	182	33	6358	0	-9.84	-19.791	7	0	0	0	0	0	0	0	38.5827	9.41	7.45	1.57	2.35	1.96	8.63	3.14	6.67	1.96	0.78	15.29	2.35	0.78	3.14	13.33	11.76	2.75	0.78	0.78	5.1
ENSMUSG00000003198	ENSMUST00000054780	Zfp959	0.934262	0.71293	0.221332	0.797242	0.645431	0.151812	-0.06952	-0.0674994	64	73	1620	37	344	37	6809	0	8.038	-12.98	4	0	0	0	0	0	0	0	19.5167	3.53	6.12	4.82	3.15	7.98	7.05	6.12	6.12	6.68	4.27	5.38	9.28	1.3	2.6	3.71	6.68	5.94	0.93	5.38	2.97
ENSMUSG00000003199	ENSMUST00000149441	Mpnd	0.5763	0.013956	0.562344	0.429529	0.141599	0.28793	-0.274414	0.127643	49	70	1464	59	188	46	7590	1.427	-10.924	-15.443	13	0	0	1	0	0	0	0	46.0905	7.39	4.72	2.26	5.34	2.05	8.42	4.11	9.24	2.46	1.85	10.47	4.72	2.87	2.87	7.39	8.01	4.31	1.64	3.08	6.78
ENSMUSG00000003200	ENSMUST00000003268	Sh3gl1	0.651267	0.467565	0.183702	0.829998	0.644586	0.185412	0.00171045	0.17702	176	74	1107	57	790	55	19886	1.636	-8.45	-15.574	10	0	1	0	0	0	0	0	49.0463	5.71	5.43	2.99	6.79	1.09	10.05	5.71	6.52	1.63	3.26	11.14	9.24	2.45	3.8	6.25	7.07	2.72	0.27	2.17	5.71
ENSMUSG00000003206	ENSMUST00000003274	Ebi3	-0.0453034	0.334019	-0.379323						222	56	687	61	245	45	4383	0	-3.224	-3.704	5	0	0	1	0	0	0	2.13	39.207	9.21	7.89	1.32	3.07	2.19	2.19	6.58	4.39	3.07	3.07	9.65	3.07	0.88	3.51	10.09	10.96	6.58	2.19	3.51	6.58
ENSMUSG00000003208	ENSMUST00000086869	Yju2	0.777149	0.434379	0.34277	0.871167	0.645186	0.225981	-0.116789	0.210807	64	54	945	57	651	54	9112	0	-4.534	0.643	8	0	0	0	0	0	1	0	53.6741	8.6	7.32	4.78	5.1	1.59	12.42	6.05	3.5	1.27	1.91	8.6	8.92	2.55	2.55	6.69	5.1	5.41	0.32	2.87	4.46
ENSMUSG00000003226	ENSMUST00000003310	Ranbp2	0.791006	0.523471	0.267535	0.637179	0.210697	0.426482	0.158946	-0.312773	58	75	9162	40	388	29	47435	2.184	5.125	-27.472	29	0	18	0	0	0	0	0	19.9541	6.35	3.9	4.78	5.93	2.19	8.12	4.49	6.09	2.23	3.34	8.09	8.42	1.47	5.08	5.21	9.56	5.5	1.24	2.33	5.67
ENSMUSG00000003228	ENSMUST00000236876	Grk5	0.229771	0.0104898	0.219281	0.558486	0.574694	-0.0162085	-0.23549	0.564205	117	69	378	46	139	41	161292	1.773	-1.033	-12.69	5	0	0	0	0	0	0	0	36.2903	3.2	7.2	3.2	5.6	3.2	8.8	4	7.2	1.6	6.4	11.2	12.8	2.4	3.2	4	3.2	5.6	0.8	4	2.4
ENSMUSG00000003233	ENSMUST00000171774	Dvl3	0.570523	0.162009	0.408514	0.690349	0.589358	0.100991	-0.307522	0.427349	89	84	2100	58	130	43	14541	0	-6.016	-15.009	15	0	0	0	0	0	0	0	45.4155	6.01	7.3	3.29	6.29	0.86	5.87	1.86	8.58	3.58	4.01	6.29	3.43	3.43	3.86	9.01	13.45	5.58	0.72	2.58	4.01
ENSMUSG00000003234	ENSMUST00000003319	Abcf3	0.815833	0.400766	0.415067	0.81453	0.412273	0.402258	-0.0128096	0.011507	96	62	2130	53	864	48	12803	1.493	-4.272	2.528	21	0	0	1	0	0	0	0	37.5706	7.76	7.62	3.53	5.78	0.99	8.6	5.5	6.63	2.12	4.09	12.55	5.08	1.97	3.81	3.67	7.19	3.39	0.71	2.54	6.49
ENSMUSG00000003235	ENSMUST00000003320	Eif2b5	0.916887	0.422617	0.49427	0.892671	0.424085	0.468585	-0.0256848	0.00146846	97	57	2154	52	303	51	10507	0.889	-4.629	-19.067	16	0	0	0	0	0	0	0	33.5196	6.69	5.72	4.04	6	1.95	8.65	5.16	6.56	2.65	4.6	11.02	3.77	1.39	3.35	4.18	7.25	4.74	1.26	2.51	8.51
ENSMUSG00000003269	ENSMUST00000107729	Cyth2	0.911942	0.580977	0.330965	0.885271	0.506884	0.378387	0.047422	-0.0740931	195	76	1200	54	1124	50	7675	0.798	-3.603	-14.574	12	0	0	5	0	0	0	0	44.7236	4.76	7.77	6.02	5.76	1.5	11.03	3.76	5.76	1.5	5.01	10.78	6.77	3.01	4.51	5.26	3.51	4.01	1.25	3.01	5.01
ENSMUSG00000003271	ENSMUST00000075571	Sult2b1	0.940063	0.622467	0.317596	0.911035	0.562433	0.348602	0.0310064	-0.0600346	159	76	1017	55	17	41	29630	0	-3.688	-16.168	7	0	1	0	0	0	0	0	40.6528	5.03	5.03	4.14	6.21	0.89	6.51	5.03	6.51	1.78	5.62	6.8	4.14	2.66	5.92	7.69	11.54	2.96	2.96	3.25	5.33
ENSMUSG00000003273	ENSMUST00000003360	Car11	0.399244	-0.898216	1.29746						430	66	987	59	168	44	4840	0	-6.23	-28.125	9	0	0	0	1	0	0	0	38.8379	7.62	7.93	5.49	3.35	0.91	3.96	3.96	9.45	3.35	3.35	14.33	1.52	0.61	4.27	8.23	9.15	3.05	1.83	2.74	4.88
ENSMUSG00000003282	ENSMUST00000003369	Plag1	0.685789	0.603133	0.0826566	0.643367	0.637429	0.00593813	-0.0767184	0.0342962	580	49	1500	47	2694	36	37387	0	2.007	-9.936	6	1	1	3	0	0	0	20.99	32.3293	4.61	3.61	3.21	4.61	3.41	5.21	5.01	5.21	5.81	2	10.02	8.42	2.61	4.61	6.61	12.63	6.41	0	2.2	3.81
ENSMUSG00000003283	ENSMUST00000003370	Hck									225	69	1575	54	292	46	42974	0.537	-5.245	-24.284	13	0	0	2	0	0	0	10.42	40.3442	6.3	5.34	3.24	4.77	1.53	8.21	3.63	6.87	1.91	5.34	7.44	7.44	3.05	4.39	6.49	9.16	4.01	1.72	3.63	5.53
ENSMUSG00000003299	ENSMUST00000216175	Mrpl4	0.832832	0.49619	0.336642	0.826751	0.55909	0.267661	-0.0689811	0.0628998	23	73	519	60	304	55	4960	1.34	-10.696	1.368	8	0	0	0	0	0	0	0	44.4444	9.88	13.37	1.16	2.91	0.58	6.98	5.81	6.98	4.65	6.4	8.72	2.91	1.16	2.91	6.98	8.14	2.33	2.33	0.58	5.23
ENSMUSG00000003308	ENSMUST00000049567	Keap1	0.860552	0.489818	0.370733	0.887917	0.702131	0.185786	-0.184947	0.212313	326	73	1875	60	971	51	9341	1.51	-10.487	-9.646	6	0	0	0	0	0	0	2.82	47.0305	7.53	6.25	3.85	4.81	4.01	5.93	5.45	7.69	3.21	4.17	7.85	2.72	2.88	3.21	4.49	6.89	4.97	1.28	4.33	8.49
ENSMUSG00000003309	ENSMUST00000003397	Ap1m2	0.697765	0.342482	0.355284	0.691741	-0.329768	1.02151	0.666226	-0.67225	63	69	1272	52	371	51	16851	0	-4.887	-0.661	11	0	0	0	0	0	0	0	38.3886	3.31	4.73	3.78	4.02	0.47	8.27	3.07	5.91	1.65	6.62	9.22	7.57	2.36	5.44	4.96	8.98	4.49	1.18	3.78	10.17
ENSMUSG00000003316	ENSMUST00000164283	Glg1	0.359592	0.132133	0.227459	0.425736	0.350867	0.0748691	-0.15259	0.218734	4	50	909	56	1945	50	101636	3.394	-10.733	23.107	21	0	0	1	0	0	0	0	43.5216	6.62	4.64	3.97	3.64	4.3	6.62	9.27	11.26	2.32	3.64	8.28	4.64	2.32	2.32	6.62	7.95	4.3	1.66	1.66	3.97
ENSMUSG00000003341	ENSMUST00000020383	Atp8b3									119	72	4008	53	285	56	19541	0	-3.417	-8.632	28	0	1	0	0	0	0	0	39.7301	6.67	4.79	4.19	4.64	1.87	5.84	4.94	4.72	2.4	5.09	11.69	6.22	3.3	4.79	3.67	7.27	5.69	1.57	3.45	7.19
ENSMUSG00000003344	ENSMUST00000003434	Btbd2	0.723606	0.00187598	0.72173	0.864479	0.379904	0.484575	-0.237155	0.378028	541	60	1572	62	913	59	14455	0	-11.974	15.426	9	0	0	0	0	0	0	6.26	51.7241	10.33	5.54	4.02	4.97	2.49	5.74	3.44	7.84	1.72	3.63	8.03	3.82	1.53	5.54	7.46	6.12	6.88	0.57	2.1	8.22
ENSMUSG00000003345	ENSMUST00000085435	Csnk1g2	0.509721	0.194442	0.315279	0.562207	0.486171	0.0760363	-0.239243	0.291729	316	61	1248	58	261	58	10682	2.28	-4.71	4.412	12	1	0	1	0	0	0	12.39	51.6908	4.58	7.23	3.13	5.78	1.69	6.75	2.89	7.71	3.37	4.1	9.64	8.19	2.41	4.58	5.78	5.54	6.51	0.48	5.06	4.58
ENSMUSG00000003346	ENSMUST00000191440	Abhd17a	0.715721	0.359566	0.356154	0.741914	0.571914	0.17	-0.186154	0.212348	334	76	711	61	484	58	6670	0	-9.696	-14.284	4	0	0	0	0	0	0	0	44.2553	9.75	6.36	2.12	4.66	4.66	3.39	2.12	9.32	1.27	5.08	7.63	2.97	1.69	4.24	8.47	8.05	5.93	0.85	5.51	5.93
ENSMUSG00000003348	ENSMUST00000003438	Mob3a	0.897337	0.688712	0.208625	0.87508	0.737347	0.137733	-0.0708923	0.0486346	137	61	654	56	1891	53	16603	0	-2.422	12.817	4	0	0	0	0	0	0	0	43.0556	4.61	6.91	5.07	5.53	1.84	5.99	4.61	4.15	3.69	4.61	8.29	5.99	3.23	7.83	6.45	4.15	5.07	1.38	3.69	6.91
ENSMUSG00000003352	ENSMUST00000230490	Cacnb3	0.453895	0.161498	0.292397	0.263668	0.547819	-0.284151	-0.576548	0.386321	64	87	1455	58	958	56	9425	0	-7.279	1.223	13	0	0	0	0	0	0	0	46.5839	7.02	7.44	2.89	7.02	0.83	7.64	6.4	4.96	3.31	3.93	8.88	4.96	1.65	2.27	7.02	10.74	2.48	1.24	2.89	6.4
ENSMUSG00000003355	ENSMUST00000003445	Fkbp11	0.337133	-0.266062	0.603195	0.533599	0.318371	0.215228	-0.387967	0.584433	113	63	606	53	15	26	3829	0	-6.036	4.267	6	0	0	0	0	0	0	0	33.5	6.97	5.47	1	3.48	1.49	5.97	3.98	6.47	1.99	6.47	16.42	7.96	1.49	0.5	7.46	6.97	4.48	0.5	3.48	7.46
ENSMUSG00000003360	ENSMUST00000003450	Ddx23	0.686505	0.288095	0.39841	0.74631	0.506627	0.239683	-0.158727	0.218532	67	64	2460	53	660	51	17756	2.859	-3.438	-8.632	17	0	0	1	0	0	0	3.62	42.665	5.86	12.21	1.83	7.45	0.73	10.99	4.15	6.11	1.95	5.98	7.08	10.5	2.08	2.56	4.52	5.74	3.66	0.73	1.95	3.91
ENSMUSG00000003363	ENSMUST00000117611	Pld3	0.536914	0.10331	0.433604	0.566104	0.307387	0.258717	-0.174887	0.204077	532	60	1467	57	298	57	21219	0.598	-6.738	6.296	14	0	0	0	0	0	0	6.9	36.7556	8.81	4.92	4.1	4.3	1.64	5.33	4.51	5.94	2.87	3.07	12.09	3.28	2.46	3.48	6.35	8.2	5.74	2.66	3.48	6.76
ENSMUSG00000003378	ENSMUST00000003468	Grik5	-0.140314	0.326293	-0.466607	0.243864	0.400619	-0.156755	0.309852	0.0743264	303	68	2940	61	520	62	62444	0	-10.389	-24.429	20	0	0	0	0	0	0	0	45.6033	7.66	8.07	3.88	3.27	2.04	6.84	3.17	6.95	1.84	5.41	11.13	2.86	3.06	3.78	5.92	8.07	5.41	1.33	3.06	6.23
ENSMUSG00000003379	ENSMUST00000003469	Cd79a	0.16963	0.567384	-0.397754	0.664381	0.749394	-0.0850134	0.312741	0.18201	141	55	663	54	653	54	4817	0.775	-7.162	-2.69	5	0	0	1	0	0	0	0	35.1598	3.64	5.91	7.27	4.55	3.18	6.82	4.09	10.91	0.91	4.55	13.64	2.73	1.82	3.64	7.73	3.18	5	2.27	3.18	5
ENSMUSG00000003380	ENSMUST00000076961	Rabac1	0.512466	-0.17532	0.687786	0.543441	0.0780452	0.465396	-0.222391	0.253365	172	59	558	60	169	57	3003	0.291	-11.753	-7.038	5	1	0	0	0	0	0	2.68	39.1304	10.27	6.49	1.62	2.16	1.62	5.95	5.95	8.65	1.62	2.7	12.97	2.16	2.16	6.49	4.86	5.41	3.78	2.16	3.78	9.19
ENSMUSG00000003382	ENSMUST00000119109	Etv3	0.907367	0.795748	0.111619	0.879288	0.818684	0.0606049	-0.0510142	0.0229358	263	69	1542	58	3504	45	14750	2.187	-6.19	6.151	5	0	0	8	0	0	0	0	43.1641	6.24	6.82	2.73	4.48	0.97	7.02	3.9	7.41	2.53	2.92	6.43	5.85	2.34	4.48	11.5	10.53	4.48	1.56	2.73	5.07
ENSMUSG00000003402	ENSMUST00000216344	Prkcsh	0.6089	0.0223985	0.586501	0.602216	0.213395	0.388821	-0.197681	0.190997	347	56	1566	57	315	57	11417	3.1	-7.287	2.528	18	0	0	0	0	0	0	0	45.5769	6.72	4.61	1.92	6.33	3.26	16.12	4.41	5.37	1.54	1.92	8.45	5.95	1.54	2.5	8.06	6.53	6.72	1.34	2.88	3.84
ENSMUSG00000003410	ENSMUST00000003501	Elavl3				0.338192	0.486839	-0.148646			412	72	1104	57	3498	50	37006	0	-7.586	-14.574	7	0	0	7	0	0	3	0	45.3552	8.72	4.36	5.45	4.36	0.82	3.54	5.18	10.63	1.09	5.72	9.81	5.99	2.45	4.36	4.36	7.9	5.99	0.54	3.27	5.45
ENSMUSG00000003411	ENSMUST00000106650	Rab3b									156	64	660	53	2511	46	64262	0	-2.33	-11.53	5	0	0	8	0	0	0	0	40.367	7.31	5.02	3.65	8.68	1.83	5.48	4.57	5.48	0.46	5.48	6.39	6.39	3.2	5.94	2.28	7.31	8.68	1.37	3.65	6.85
ENSMUSG00000003418	ENSMUST00000003509	St8sia6	0.398091	0.362076	0.0360155	0.440255	0.351077	0.0891773	0.0531617	-0.0109982	620	66	1197	47	5801	36	143044	0.823	3.766	-22.255	8	0	0	13	0	0	0	2.41	29.471	5.53	5.28	5.03	4.27	2.51	4.77	4.27	4.77	2.26	4.52	11.06	6.78	3.02	4.77	5.03	8.29	7.29	1.26	4.52	4.77
ENSMUSG00000003420	ENSMUST00000003512	Fcgrt	1	0.541775	0.458225	1	0.569146	0.430854	-0.027371	0.027371	416	54	1098	56	256	51	10862	0.699	-7.826	-19.936	7	0	0	0	0	0	0	6.17	34.8901	7.12	4.38	4.66	3.01	1.64	7.4	3.29	9.59	1.64	1.37	14.52	3.29	2.19	3.29	7.95	8.77	4.93	4.11	1.92	4.93
ENSMUSG00000003421	ENSMUST00000210520	Nosip	0.799211	0.165731	0.63348	0.889377	0.477178	0.412198	-0.221282	0.311448	11	54	456	58	67	60	14400	0	-6.606	15.861	6	0	0	0	0	0	0	0	51.3333	10.6	8.61	3.31	4.64	3.31	7.28	5.96	5.3	2.65	3.31	7.95	7.28	1.32	1.99	5.3	3.97	5.3	1.32	4.64	5.96
ENSMUSG00000003423	ENSMUST00000210139	Pih1d1	0.514252	-0.370228	0.88448	0.740215	0.281905	0.45831	-0.426169	0.652133	122	75	873	56	82	45	5763	0	-5.925	-8.487	10	0	0	0	0	0	0	0	40.4844	7.59	6.21	3.45	5.17	1.38	8.28	6.9	6.55	2.07	4.14	13.45	3.45	2.76	3.1	6.55	7.93	4.48	0.69	1.72	4.14
ENSMUSG00000003429	ENSMUST00000003521	Rps11	0.377249	0.30525	0.0719994	0.219602	0.18788	0.0317229	-0.0402764	-0.117371	128	68	477	49	56	42	2061	0.798	-0.181	-14.864	5	0	0	0	0	0	0	0	40.7643	3.16	8.86	3.8	3.16	1.9	4.43	5.06	6.96	1.9	7.59	5.7	13.29	2.53	5.06	3.8	3.16	7.59	0	4.43	7.59
ENSMUSG00000003435	ENSMUST00000003527	Supt5	0.546861	0.133163	0.413698	0.606608	0.332121	0.274487	-0.139211	0.198959	34	61	3249	55	230	50	23826	3.879	-4.535	3.977	30	0	1	0	0	0	0	0	42.2757	4.71	5.36	3.23	6.93	0.65	9.43	5.18	8.41	2.31	4.62	6.19	5.73	2.4	2.68	7.02	7.86	5.55	0.83	3.7	7.21
ENSMUSG00000003436	ENSMUST00000108315	Dll3	0.51451	0.91868	-0.40417	0.801828	0.399702	0.402126	0.806296	-0.518978	492	51	1758	66	368	45	8686	0	-15.642	-0.661	9	0	2	2	0	0	0	14.09	42.9795	10.43	8.89	2.05	4.44	8.21	4.96	2.39	12.82	2.22	1.2	9.4	0.34	0.34	3.08	10.09	7.18	3.59	1.2	1.54	5.64
ENSMUSG00000003437	ENSMUST00000003529	Paf1	0.857523	0.471004	0.386518	0.80113	0.626536	0.174594	-0.211924	0.155531	257	65	1608	51	138	40	6438	1.844	0.116	-23.125	14	0	0	0	0	0	0	0	41.7603	7.29	6.36	3.36	9.72	0.56	13.46	4.86	5.61	2.06	3.74	3.74	6.54	2.24	3.18	4.86	10.47	3.55	0.56	3.18	4.67
ENSMUSG00000003438	ENSMUST00000081946	Timm50	0.807055	0.132215	0.67484	0.726384	0.293626	0.432759	-0.242081	0.161411	40	77	1062	57	413	55	6557	0	-7.423	-34.284	11	0	0	0	0	0	0	0	41.1932	7.08	7.93	2.55	5.38	1.13	6.23	5.38	6.8	1.7	4.53	11.61	4.25	1.13	4.25	8.22	6.52	4.82	1.42	3.4	5.67
ENSMUSG00000003444	ENSMUST00000003536	Med29	0.961505	0.744241	0.217264	0.927779	0.869653	0.0581255	-0.159138	0.125412	45	50	600	57	636	54	6563	0	-6.579	-7.038	4	1	0	0	0	0	0	0	43.4343	11.06	1.51	2.51	5.53	3.52	2.51	12.56	6.53	1.51	3.02	11.06	5.53	1.51	1.51	9.05	8.54	6.03	0	2.01	4.52
ENSMUSG00000003452	ENSMUST00000086829	Bicd1									445	59	2508	45	6714	31	154346	0	4.638	-5.443	9	0	1	34	0	0	0	0	33.8129	6.95	5.87	5.27	4.19	0.6	13.65	5.87	2.99	2.51	4.55	11.86	8.98	2.28	1.2	2.63	6.71	6.35	0	2.87	4.67
ENSMUSG00000003458	ENSMUST00000003550	Ncstn	0.629119	0.374794	0.254325	0.564671	0.247565	0.317106	0.0627811	-0.127229	113	63	2127	51	661	47	16783	0.165	-2.636	-13.704	17	0	3	0	0	0	0	2.75	32.8147	7.77	4.94	5.23	4.52	1.69	5.51	4.1	5.51	1.69	4.1	10.17	3.67	1.69	4.66	5.23	9.89	6.5	1.69	3.39	8.05
ENSMUSG00000003464	ENSMUST00000111252	Pex19	0.659031	0.373377	0.285653	0.575324	0.282532	0.292792	0.00713856	-0.0908455	17	52	624	54	2203	44	9732	0.748	-5.767	12.528	6	0	0	5	0	0	0	0	41.7476	7.73	1.45	2.9	5.31	1.93	14.01	8.21	7.25	1.45	2.9	12.08	4.35	5.8	2.42	5.8	8.21	3.86	0.48	1.45	2.42
ENSMUSG00000003469	ENSMUST00000003561	Phyhip									348	59	993	57	1497	57	11357	0	-4.947	-6.313	5	0	0	0	0	0	0	3.37	48.0243	5.76	5.15	4.55	5.45	3.03	5.76	3.94	5.76	4.24	4.55	9.39	5.15	2.12	5.45	4.85	8.18	6.06	1.21	4.24	5.15
ENSMUSG00000003484	ENSMUST00000003574	Cyp4f18	0.558088	1	-0.441912						49	54	1575	55	78	49	21145	0	-6.133	2.528	13	0	1	0	0	0	0	0	37.6673	7.25	7.63	2.1	5.92	2.29	4.96	2.86	5.34	3.44	5.34	13.55	4.77	2.48	5.15	6.3	6.11	4.39	2.29	2.29	5.53
ENSMUSG00000003500	ENSMUST00000159124	Impdh1	0.801216	0.452591	0.348626	0.74992	0.692127	0.0577928	-0.290833	0.239536	294	72	1545	55	761	59	15928	1.425	-6.017	-20.516	15	0	0	0	0	0	0	0	38.9864	8.75	3.7	1.95	6.23	1.17	4.67	4.86	10.12	2.33	6.81	8.75	6.42	3.31	3.11	3.31	6.81	6.03	0	3.31	8.37
ENSMUSG00000003518	ENSMUST00000107172	Dusp3	0.423335	0.331849	0.0914853	0.894308	0.907374	-0.0130657	-0.104551	0.575525	296	52	558	56	3591	47	15871	0	-5.626	-3.704	5	3	0	4	0	0	0	19.27	42.9348	7.57	5.41	5.95	5.95	2.16	4.86	5.95	6.49	2.16	3.78	10.81	4.32	2.7	3.78	2.7	9.73	4.32	0	3.78	7.57
ENSMUSG00000003526	ENSMUST00000003620	Prodh	0.839146	0.184096	0.65505	0.454063	-0.0297304	0.483794	-0.171256	-0.213827	135	63	1800	56	451	55	17568	0	-8.195	-2.4	14	0	0	0	0	0	0	2.88	42.1405	9.68	8.68	2.84	4.17	1.84	8.01	5.68	6.34	2.34	3.01	10.35	4.34	3.51	4.67	4.51	5.34	4.01	1	3.17	6.51
ENSMUSG00000003527	ENSMUST00000003621	Ess2	0.907098	0.210079	0.697019	0.921719	0.392633	0.529086	-0.167933	0.182554	43	66	1443	57	1335	52	10640	0.562	-6.574	-16.893	10	0	0	0	0	0	0	0	43.6326	10.83	7.08	2.71	3.75	0	10	5.63	6.88	1.46	2.29	8.33	6.04	1.46	3.33	9.17	8.13	5.63	0.63	2.29	4.38
ENSMUSG00000003528	ENSMUST00000003622	Slc25a1	0.7993	0.367951	0.431349	0.817966	0.515812	0.302154	-0.129195	0.147861	140	71	936	57	590	57	2997	0	-5.562	-22.98	9	0	0	0	0	0	0	0	39.6774	8.04	7.07	3.86	3.54	1.93	3.54	3.54	11.58	2.25	5.47	9.65	6.43	2.25	4.18	5.14	4.18	5.79	0.64	3.22	7.72
ENSMUSG00000003531	ENSMUST00000155387	Dgcr6	0.949937	-0.13715	1.08709	0.676621	0.343788	0.332833	-0.754255	0.480938	42	78	702	63	671	54	5185	0	-14.781	-40.226	4	0	0	0	0	0	0	0	55.1724	12.88	10.3	2.15	3.43	1.29	7.3	11.59	6.44	2.58	2.15	14.59	3.43	1.72	1.29	1.72	4.72	5.58	0.43	2.15	4.29
ENSMUSG00000003534	ENSMUST00000117301	Ddr1	0.604769	0.278492	0.326276	0.625432	0.507784	0.117648	-0.208629	0.229292	327	61	2736	60	811	54	23033	0	-11.646	-16.893	19	0	0	0	0	0	0	5.78	42.967	6.81	7.57	2.85	5.82	1.98	5.16	4.06	9.11	2.09	3.18	11.64	2.41	2.63	3.62	8.67	6.04	4.5	2.2	2.96	6.7
ENSMUSG00000003541	ENSMUST00000003635	Ier3	0.834283	1	-0.165717	0.784005	0.845326	-0.0613204	0.104396	-0.154674	35	45	483	61	613	49	1240	0	-6.483	16.875	2	0	0	5	0	0	0	0	42.7673	10	9.38	2.5	2.5	1.25	6.88	3.13	3.75	3.13	4.38	11.25	1.88	1.88	4.38	11.88	8.13	6.88	0	1.25	5.63
ENSMUSG00000003545	ENSMUST00000003640	Fosb	0.744755	0.731627	0.0131286	0.732549	0.716879	0.0156704	0.00254185	-0.0147477	620	55	1017	61	2145	52	7356	1.165	-5.937	-16.023	4	2	0	1	0	0	1	0	43.0267	8.88	6.21	1.18	3.85	1.48	8.58	5.03	7.4	0.59	1.18	8.58	2.66	1.18	3.25	12.43	13.31	6.8	0.59	2.07	4.73
ENSMUSG00000003545	ENSMUST00000003640	Fosb	0.744755	0.731627	0.0131286	0.732549	0.716879	0.0156704	0.00254185	-0.0147477	620	55	1017	61	2145	52	7356	1.165	-5.937	-16.023	4	2	0	1	0	0	1	0	43.0267	8.88	6.21	1.18	3.85	1.48	8.58	5.03	7.4	0.59	1.18	8.58	2.66	1.18	3.25	12.43	13.31	6.8	0.59	2.07	4.73
ENSMUSG00000003545	ENSMUST00000207716	Fosb	0.744755	0.731627	0.0131286	0.732549	0.716879	0.0156704	0.00254185	-0.0147477	615	54	792	62	2139	52	7345	1.165	-5.926	-16.023	3	2	0	1	0	0	0	0	43.5115	8.75	4.18	0.76	4.18	1.14	7.98	4.56	8.37	0.76	0.76	7.98	2.28	0.76	3.8	14.45	15.59	6.08	0.38	2.66	4.56
ENSMUSG00000003545	ENSMUST00000207716	Fosb	0.744755	0.731627	0.0131286	0.732549	0.716879	0.0156704	0.00254185	-0.0147477	615	54	792	62	2139	52	7345	1.165	-5.926	-16.023	3	2	0	1	0	0	0	0	43.5115	8.75	4.18	0.76	4.18	1.14	7.98	4.56	8.37	0.76	0.76	7.98	2.28	0.76	3.8	14.45	15.59	6.08	0.38	2.66	4.56
ENSMUSG00000003546	ENSMUST00000003642	Klc4	0.62844	-0.100837	0.729277	0.737787	0.204117	0.53367	-0.195606	0.304953	70	59	1860	59	392	53	14514	0.358	-10.529	-12.98	16	0	0	0	0	0	0	0	47.7346	9.53	7.43	3.55	4.52	1.45	10.34	6.95	7.75	2.75	2.26	12.28	5.17	1.29	0.65	3.23	8.24	3.55	0.65	3.23	5.17
ENSMUSG00000003549	ENSMUST00000003645	Ercc1	0.797742	0.0185327	0.77921	0.797127	0.467682	0.329445	-0.449765	0.44915	426	57	897	57	52	53	11747	0	-5.155	-6.313	10	0	0	0	0	0	0	2.93	43.0976	8.72	5.7	3.02	3.36	2.01	8.05	5.03	5.7	1.68	2.68	11.74	5.7	1.01	3.69	9.06	6.38	6.38	0.67	2.68	6.71
ENSMUSG00000003559	ENSMUST00000237219	As3mt	0.789131	0.270009	0.519122	0.183137	-0.12728	0.310417	-0.208705	-0.39729	366	49	822	49	531	41	33132	0	1.514	-4.719	9	0	0	1	0	0	0	0	30.5147	7.69	4.4	2.93	5.13	2.93	9.89	2.93	7.33	2.56	5.13	8.79	8.06	1.1	5.49	5.13	4.03	4.4	0.73	2.56	8.79
ENSMUSG00000003573	ENSMUST00000140212	Homer3	-0.669998	-2.04751	1.37751	0.6078	-0.115141	0.72294	-0.654567	1.93236	342	71	1071	60	1195	55	11535	0.896	-9.06	1.803	10	0	0	1	0	0	0	0	49.0141	12.92	8.71	3.09	2.81	0.28	12.08	8.99	5.34	0.84	2.25	8.43	3.93	1.12	3.65	3.65	6.46	7.58	1.12	1.12	5.62
ENSMUSG00000003575	ENSMUST00000076615	Crtc1	0.235582	0.117101	0.118481	0.324629	0.342554	-0.0179247	-0.136406	0.225453	21	66	1893	60	3769	57	57225	0	-5.291	-4.139	14	0	1	2	0	0	0	0	48.1717	6.98	4.13	3.17	4.76	0.32	3.65	8.41	7.78	2.54	2.06	9.84	2.22	2.38	2.54	11.59	13.17	7.94	0.32	2.06	4.13
ENSMUSG00000003581	ENSMUST00000003677	Rnf215	0.740654	0.0195033	0.721151	0.792764	0.441708	0.351056	-0.370095	0.422205	71	67	1140	59	663	49	5971	0	-12.501	-5.588	9	0	0	0	0	0	0	0	39.9471	8.18	6.6	2.37	4.49	2.9	5.28	7.39	7.92	1.85	2.11	16.36	3.43	1.58	1.58	7.39	6.33	3.17	2.11	1.58	7.39
ENSMUSG00000003585	ENSMUST00000003681	Sec14l2	0.899874	0.683631	0.216243	0.797828	0.0874473	0.710381	0.494138	-0.596183	153	70	1212	52	1266	53	21793	0	-1.34	-12.4	12	0	1	0	0	0	0	0	39.801	3.97	4.96	2.73	6.2	1.99	7.44	5.71	6.95	1.74	4.71	10.17	8.44	2.98	4.22	5.96	4.96	4.71	1.49	4.22	6.45
ENSMUSG00000003604	ENSMUST00000003705	Aven	0.39506	0.151108	0.243952	0.331937	0.164544	0.167393	-0.076559	0.0134361	27	77	1029	56	3679	43	141610	1.555	-8.255	-10.226	6	0	2	5	0	2	0	0	37.5367	5.85	10.53	2.92	6.14	0.88	12.28	5.26	13.74	0.88	1.75	7.89	3.22	1.17	1.75	5.85	8.77	4.39	1.17	0.88	4.68
ENSMUSG00000003617	ENSMUST00000091309	Cp									230	38	3186	42	613	39	36085	0	3.857	4.557	19	1	4	0	0	0	0	4.17	23.4906	5	3.39	4.62	6.41	1.32	7.07	3.58	7.26	3.58	4.15	7.26	6.69	2.64	5.56	4.52	6.31	6.41	1.51	5.66	7.07
ENSMUSG00000003623	ENSMUST00000003720	Crot	0.80094	0.513114	0.287826	0.72646	0.501541	0.22492	-0.0629059	-0.0115733	338	64	1839	43	819	35	31292	0	2.756	3.397	18	0	0	0	0	0	0	0	20.2946	5.88	5.72	3.43	4.25	2.61	8.5	4.08	5.72	3.92	3.59	10.78	5.56	2.94	4.74	5.07	6.54	4.9	1.8	3.59	6.37
ENSMUSG00000003644	ENSMUST00000168974	Rps6ka1	0.732426	0.168838	0.563587	0.825484	0.402153	0.423331	-0.140256	0.233314	64	57	2160	55	758	54	27438	0	-5.237	0.643	21	0	1	0	0	0	0	0	44.1504	5.7	5.42	2.36	5.98	0.97	6.26	3.89	6.82	3.48	4.59	11.13	7.79	2.23	4.73	5.29	6.54	6.12	0.83	3.48	6.4
ENSMUSG00000003660	ENSMUST00000103220	Snrnp200	0.778864	0.348372	0.430492	0.778415	0.467482	0.310933	-0.119559	0.11911	95	60	6411	50	239	44	32053	4.368	-2.1	-1.965	45	0	1	0	0	0	0	0	34.192	5.81	5.81	3.84	6.32	1.36	8.1	4.78	4.82	2.67	5.99	11.61	6.37	2.86	3.42	4.03	5.62	5.38	0.94	3.42	6.88
ENSMUSG00000003662	ENSMUST00000003759	Ciao1	0.935661	0.534017	0.401644	0.85815	0.41712	0.44103	0.0393853	-0.116897	196	55	1020	55	1859	37	6879	0.869	-6.456	4.846	7	0	1	7	0	0	0	3.02	37.2781	7.96	4.13	2.36	7.96	5.31	6.49	4.42	6.49	3.24	2.65	7.37	3.54	0.29	2.36	4.42	10.32	5.9	5.01	2.06	7.67
ENSMUSG00000003665	ENSMUST00000003762	Has1									42	53	1752	59	301	41	11866	0	-13.308	13.107	5	0	0	4	0	0	0	0	33.3333	13.38	8.92	1.89	3.95	2.57	3.95	2.92	6.86	1.89	1.2	13.21	1.89	2.57	3.6	3.77	6	3.95	3.6	5.49	8.4
ENSMUSG00000003680	ENSMUST00000176610	Taf6l	0.557776	0.267261	0.290515	0.693428	0.374778	0.31865	0.0281349	0.107517	156	63	1872	60	37	61	11825	0	-10.417	-12.545	12	0	0	0	0	0	0	3.96	39.2283	10.11	8.03	1.77	4.65	1.28	4.98	4.49	8.19	2.25	1.93	12.2	3.21	1.28	2.57	8.03	8.35	4.33	1.12	3.69	7.54
ENSMUSG00000003721	ENSMUST00000160968	Insig2	0.863448	0.822371	0.0410765	0.733292	0.82193	-0.0886387	-0.129715	-0.000440843	158	48	678	46	368	37	22209	1.559	0.31	5.281	6	0	1	1	0	0	0	6.56	19.6429	6.67	4.44	3.56	2.67	3.11	3.56	3.56	8	1.78	6.22	9.33	3.11	1.78	7.11	4.89	8.44	4.89	2.67	3.11	11.11
ENSMUSG00000003731	ENSMUST00000003828	Kpna6	0.826413	0.557494	0.26892	0.795179	0.413374	0.381806	0.112886	-0.14412	85	46	1602	48	508	52	14996	0.844	0.458	-1.82	14	0	0	0	0	0	2	0	31.5789	7.5	5.25	5.44	5.44	2.44	8.07	5.63	4.69	0.75	6.57	11.63	4.69	2.06	3.56	4.32	8.07	4.69	1.13	2.06	6
ENSMUSG00000003746	ENSMUST00000218317	Man1a	0.499821	0.260125	0.239697	0.389514	0.275397	0.114117	-0.125579	0.015272	452	71	1086	55	1209	44	168695	2.101	-8.322	-17.907	12	0	2	0	0	0	0	0	40.2778	8.31	7.48	3.88	3.88	0.55	8.31	2.77	10.8	1.66	4.16	12.19	6.09	1.39	4.99	5.82	6.09	2.77	1.66	2.22	4.99
ENSMUSG00000003752	ENSMUST00000003850	Itpkc	0.937191	0.737802	0.199388	0.933523	0.751647	0.181875	-0.0175131	0.0138449	141	68	2037	57	1069	52	21457	0	-8.791	-30.081	7	0	1	1	0	0	0	0	41.8021	6.19	6.78	2.65	6.78	2.36	8.41	4.28	9.73	2.65	1.92	9.59	4.42	2.21	2.95	7.52	8.41	5.75	1.62	1.47	4.28
ENSMUSG00000003762	ENSMUST00000003860	Coq8b	0.539066	-0.27188	0.810946	0.759402	0.52143	0.237971	-0.572974	0.79331	154	60	1602	59	425	58	24928	0	-9.83	-13.994	15	0	0	0	0	0	0	0	41.3534	10.51	8.63	1.13	5.07	2.63	6.19	6.75	7.88	2.25	3.38	12.57	3	1.88	4.69	5.25	6.19	3.56	1.5	1.5	5.44
ENSMUSG00000003778	ENSMUST00000003876	Brd8	0.662342	0.308381	0.353961	0.768445	0.300343	0.468101	0.114141	-0.00803748	45	59	2856	50	1567	39	25987	1.563	-1.467	-5.154	22	0	0	2	0	0	0	0	29.1579	8.2	4.1	1.79	6.52	0.84	10.2	3.89	6.41	1.79	4.63	7.36	5.36	3.36	2	9.25	10.2	5.78	0.63	1.05	6.62
ENSMUSG00000003779	ENSMUST00000237407	Kif20a	0.925386	0.445881	0.479506	0.664646	0.541115	0.123531	-0.355975	0.0952346	348	51	2664	49	662	38	8543	0	0.339	-10.661	19	1	1	1	0	0	0	0	35.1016	5.86	4.96	3.61	4.62	1.92	8.34	8.46	4.74	2.48	4.51	12.51	7.44	1.24	2.93	4.51	9.36	4.96	0.79	1.69	5.07
ENSMUSG00000003808	ENSMUST00000003906	Farsa	0.867906	-0.082486	0.950392	0.796025	0.282333	0.513693	-0.436699	0.364819	46	68	1527	56	253	51	12269	0.832	-7.356	-12.4	13	0	0	1	0	0	0	0	42.0118	7.28	6.69	2.76	3.74	0.39	8.66	5.12	6.69	2.95	3.54	10.83	6.1	2.56	4.72	4.92	7.09	4.72	1.57	2.56	7.09
ENSMUSG00000003809	ENSMUST00000003907	Gcdh	0.570219	0.158625	0.411594	0.702969	0.264151	0.438818	0.0272239	0.105527	236	59	1344	54	587	43	7525	0	-5.704	-7.038	11	0	1	0	0	0	0	10.39	36.7713	7.83	8.05	3.8	4.03	2.01	6.04	3.36	9.17	2.46	5.59	10.96	3.8	3.58	2.91	4.25	6.71	5.82	1.12	3.13	5.37
ENSMUSG00000003810	ENSMUST00000003908	Mast2	0.0936737	0.126391	-0.0327172	0.364349	0.523013	-0.158664	-0.125947	0.396622	190	76	5202	53	53	44	157161	0	-2.129	-14.429	29	0	1	0	0	0	0	0	34.4111	5.77	6.92	2.19	4.5	1.33	7.5	4.21	6.52	3.46	3.29	10.62	5.02	1.44	2.65	8.83	12.98	5.65	0.87	1.5	4.73
ENSMUSG00000003812	ENSMUST00000145292	Dnase2a	0.865409	0.634113	0.231297	0.823407	0.655818	0.167589	-0.0637075	0.0217053	86	51	450	58	142	49	1236	0	-8.654	-10.516	4	0	0	0	0	0	0	0	31.7568	7.38	4.7	2.01	4.03	2.68	1.34	4.03	8.72	2.01	0.67	13.42	4.7	2.01	0.67	7.38	15.44	4.03	3.36	4.7	6.71
ENSMUSG00000003813	ENSMUST00000003911	Rad23a	0.838341	0.199358	0.638983	0.616268	0.357454	0.258813	-0.38017	0.158096	76	69	1089	55	909	51	5990	0.875	-5.332	-5.299	9	0	0	0	0	0	0	0	42.1053	8.56	3.31	3.59	3.31	0.28	11.88	7.73	5.8	1.38	5.25	7.73	4.42	2.76	3.04	9.39	7.73	5.52	0	2.21	6.08
ENSMUSG00000003814	ENSMUST00000003912	Calr	0.814281	0.559142	0.255139	0.435521	0.104277	0.331244	0.0761049	-0.454865	136	61	1251	49	797	47	5085	2.472	-0.364	-1.53	9	0	0	2	0	0	0	0	38.5542	5.05	2.16	3.85	13.46	0.72	12.26	3.61	6.25	1.68	4.57	6.49	10.34	1.2	4.33	6.25	4.33	3.37	2.64	3.37	4.09
ENSMUSG00000003824	ENSMUST00000136026	Syce2	0.746879	0.416854	0.330025	0.730438	-0.400865	1.1313	0.801278	-0.817719	128	77	516	50	1042	44	16111	0	2.001	-31.241	5	0	1	1	1	0	0	0	44.1176	4.68	3.51	3.51	4.09	2.92	14.04	7.6	2.92	4.09	4.09	7.6	8.19	3.51	1.75	5.26	8.77	4.68	0	2.34	6.43
ENSMUSG00000003847	ENSMUST00000154474	Nfat5	0.161483	0.267015	-0.105532	0.148972	0.186875	-0.0379037	0.0676281	-0.0801395	356	71	246	51	5497	44	78758	2.007	-2.25	-16.603	15	0	0	5	0	0	0	0	22.5	9.88	2.47	1.23	6.17	1.23	7.41	2.47	6.17	0	2.47	12.35	3.7	2.47	2.47	11.11	17.28	2.47	0	2.47	6.17
ENSMUSG00000003848	ENSMUST00000003946	Nob1	0.854375	0.602938	0.251437	0.959931	0.672913	0.287018	0.0355817	0.0699752	21	56	1212	55	425	44	12561	0.825	-5.644	2.672	9	0	0	0	0	0	0	0	43.5323	6.45	7.44	3.72	6.2	1.74	7.69	4.71	6.2	2.98	4.47	9.43	6.2	1.99	3.97	5.96	6.2	4.96	0.5	2.23	6.95
ENSMUSG00000003849	ENSMUST00000003947	Nqo1	0.337133	0.63406	-0.296927	0.534932	0.426931	0.108001	0.404929	-0.207129	134	54	825	49	594	40	14982	0	-1.383	0.354	6	0	0	1	0	0	0	0	34.4322	8.39	3.65	4.01	3.65	0.36	6.93	4.74	7.3	2.19	5.47	10.22	8.03	2.92	5.84	4.74	6.93	3.28	2.19	3.65	5.47
ENSMUSG00000003863	ENSMUST00000003961	Ppfia3									158	78	3585	58	904	59	27675	0	-8.601	-8.632	30	0	0	2	0	0	0	0	45.1802	8.46	8.79	2.93	4.52	0.84	11.98	4.94	6.62	1.76	2.09	13.32	5.28	2.76	1.26	5.36	8.96	4.36	1.17	1.17	3.43
ENSMUSG00000003865	ENSMUST00000003964	Gys1	0.369983	-0.0521293	0.422113	0.407792	0.261062	0.146731	-0.275382	0.313191	209	62	2217	55	1252	52	21776	0	-4.677	5.426	16	0	1	1	0	0	0	0	39.8915	6.91	6.91	4.07	5.28	1.9	7.72	2.98	6.23	2.71	3.25	9.49	3.93	1.9	5.42	5.69	7.86	5.69	1.9	4.07	6.1
ENSMUSG00000003868	ENSMUST00000211214	Ruvbl2	0.865001	0.365531	0.499469	0.805035	0.492578	0.312457	-0.187012	0.127047	700	58	1392	57	220	50	16337	0	-6.695	-12.98	18	0	0	0	0	0	1	0	43.5065	8.21	7.13	1.08	5.83	0.65	9.07	4.1	7.78	1.3	8.86	7.99	5.83	3.24	2.81	2.59	6.48	8.42	0.22	1.94	6.48
ENSMUSG00000003872	ENSMUST00000003971	Lin7b				0.733104	0.677585	0.0555193			25	60	624	61	86	41	2693	0	-17.196	-8.632	6	0	0	2	0	0	0	0	44.1748	9.66	9.66	1.45	2.9	0.48	10.14	5.31	8.21	3.86	2.9	10.63	4.35	1.93	1.93	3.86	7.25	3.86	0	2.42	9.18
ENSMUSG00000003873	ENSMUST00000033093	Bax	0.720321	0.410015	0.310306	0.716466	0.589761	0.126704	-0.183601	0.179746	123	74	579	58	165	47	5202	2.051	-8.878	-26.313	6	0	0	0	0	0	0	2.9	41.8848	6.77	5.73	1.56	6.25	1.04	6.25	5.21	9.9	0	4.69	11.46	4.17	4.17	5.73	3.65	5.73	7.81	3.13	1.04	5.73
ENSMUSG00000003882	ENSMUST00000003981	Il7r	0.87061	0.740685	0.129926	0.812374	0.641925	0.170449	0.0405227	-0.0987593	93	44	1380	43	2067	37	24048	2.29	4.616	9.194	8	0	4	6	0	0	0	0	20.524	5.88	4.79	5.66	5.01	2.4	5.66	4.36	3.7	2.83	4.36	10.24	6.54	1.09	4.36	7.84	9.15	5.01	1.53	2.18	7.41
ENSMUSG00000003923	ENSMUST00000092430	Tfam	0.957106	0.752267	0.204839	0.881678	0.749826	0.131851	-0.072988	-0.00244087	340	70	732	45	3095	41	12817	2.644	2.649	-24.139	7	0	2	6	0	0	0	5.63	24.7934	8.64	7.82	1.65	3.7	1.65	9.47	3.7	4.94	0.82	4.12	9.05	12.76	3.7	2.47	4.53	9.47	1.23	2.06	3.7	4.53
ENSMUSG00000003929	ENSMUST00000054072	Zfp81	0.887192	0.749466	0.137726	0.9063	0.622313	0.283987	0.146261	-0.127153	142	57	1596	38	4901	35	29537	0	7.874	3.107	4	0	2	14	0	0	0	0	22.6415	3.95	5.08	3.39	2.64	5.84	8.66	4.9	5.84	7.53	5.08	4.9	9.79	1.13	3.77	3.58	6.78	6.4	0.38	6.59	3.77
ENSMUSG00000003934	ENSMUST00000004036	Efnb3	0.872521	-0.0538871	0.926408	0.595657	0.192984	0.402673	-0.523735	0.246871	392	68	1023	61	1768	51	6114	0	-16.153	-32.255	5	0	0	0	0	2	1	4.53	40.708	8.24	7.65	1.76	3.82	1.76	5.29	2.65	16.18	2.65	2.35	9.71	2.35	2.35	2.65	11.47	6.76	2.35	0.88	4.12	5
ENSMUSG00000003948	ENSMUST00000004050	Mmd	0.920865	0.807757	0.113108	0.847132	0.807223	0.0399092	-0.073199	-0.000534109	234	76	717	48	1726	38	29114	0.891	-1.665	-9.357	7	0	3	2	0	0	1	0	24.0506	10.08	5.46	2.94	2.52	3.36	2.94	0.84	5.46	5.88	6.72	9.66	3.36	3.78	7.98	3.36	4.62	4.62	3.36	6.3	6.72
ENSMUSG00000003949	ENSMUST00000004051	Hlf	0.799398	0.55611	0.243287	0.787486	0.726369	0.0611162	-0.182171	0.170259	531	52	888	57	4223	41	54360	0	-0.632	3.832	4	1	2	8	1	0	0	6.46	48.6395	6.78	6.44	3.73	7.12	0.68	6.78	4.07	4.07	2.03	4.07	10.51	8.14	2.71	3.05	13.22	8.47	3.05	0.68	2.03	2.37
ENSMUSG00000003955	ENSMUST00000004057	Fam162a	0.684687	-0.0343844	0.719071	0.623246	0.568954	0.0542923	-0.664779	0.603338	12	83	468	49	238	37	27755	0	-0.974	0.354	5	0	0	0	0	0	0	0	38.3117	8.39	8.39	3.23	2.58	1.94	8.39	1.29	5.16	2.58	4.52	11.61	10.97	3.23	3.23	3.87	7.1	6.45	1.29	2.58	3.23
ENSMUSG00000003970	ENSMUST00000004072	Rpl8	0.0819344	-0.0196061	0.10154	0.295617	0.216889	0.0787276	-0.0228129	0.236495	42	61	774	58	35	39	2237	0.495	-8.802	-10.081	6	0	0	0	0	0	0	0	44.1406	9.73	10.89	3.5	2.72	1.56	3.89	1.95	12.84	3.89	6.23	4.28	10.12	1.17	2.72	5.45	3.11	4.28	0.39	2.33	8.95
ENSMUSG00000003992	ENSMUST00000042122	Ssbp2	0.00984836	0.0369798	-0.0271314	0.0639446	-0.0986131	0.162558	0.189689	-0.135593	96	66	996	49	541	40	240146	0	-2.121	2.962	16	0	0	0	0	0	0	0	24.8485	4.83	4.23	6.95	3.32	0.91	3.63	3.32	14.8	2.11	1.81	6.04	2.11	6.95	2.42	15.11	10.27	3.32	1.51	3.63	2.72
ENSMUSG00000004018	ENSMUST00000109509	Fancl	0.882454	0.253269	0.629185	0.765702	0.0385403	0.727162	0.0979768	-0.214729	13	61	1113	44	61	30	84220	0	2.687	12.528	14	0	1	0	0	0	0	0	24.3902	5.14	4.05	2.7	5.95	4.05	6.22	4.32	4.05	2.7	5.14	12.43	7.3	2.97	4.86	7.03	7.84	3.24	1.35	1.89	6.76
ENSMUSG00000004032	ENSMUST00000004134	Gstm5	1	0.908515	0.091485						133	60	675	47	137	54	2866	0	-0.24	-1.096	8	0	0	0	0	0	0	0	32.7354	5.36	5.36	5.8	7.14	3.13	6.7	4.46	3.57	1.34	5.36	11.61	8.48	4.91	7.59	3.57	4.02	3.13	1.79	4.02	2.68
ENSMUSG00000004035	ENSMUST00000004137	Gstm7									163	58	657	51	557	50	5484	0	-2.383	-10.081	8	0	0	0	0	0	0	2.03	40.0922	5.5	6.88	4.59	7.34	1.38	6.88	2.75	5.96	1.38	5.05	11.93	6.88	4.59	6.42	4.59	4.13	4.13	1.83	5.5	2.29
ENSMUSG00000004038	ENSMUST00000004136	Gstm3									143	56	657	51	511	53	5588	0	-1.921	-0.081	8	0	0	0	0	0	0	0	40.553	4.13	6.88	3.67	6.88	1.83	6.88	3.21	5.05	1.38	4.59	11.47	7.34	3.67	6.42	5.5	5.5	5.05	1.83	5.05	3.67
ENSMUSG00000004040	ENSMUST00000103114	Stat3	0.77148	0.380157	0.391323	0.565171	0.335281	0.22989	-0.161433	-0.0448765	172	70	2169	52	3701	50	54307	2.241	-2.094	-12.835	24	0	1	2	0	0	0	0	40.7767	5.82	4.71	4.85	4.16	1.66	7.48	8.03	4.71	1.8	5.68	10.66	6.65	3.19	3.88	4.16	6.09	5.54	2.22	2.91	5.82
ENSMUSG00000004043	ENSMUST00000107357	Stat5a	0.762836	0.306114	0.456721	0.675415	0.456193	0.219222	-0.237499	0.150078	103	69	2394	57	1108	48	24685	1.374	-7.339	-17.617	18	0	0	1	0	0	0	0	47.8643	6.27	5.27	4.89	3.76	1.63	6.52	9.03	4.39	2.63	4.64	11.54	5.14	2.13	3.89	5.65	5.77	6.27	2.89	2.01	5.65
ENSMUSG00000004044	ENSMUST00000060792	Cavin1	0.145915	-0.0648703	0.210785	0.733104	0.24511	0.487994	0.277209	0.309981	421	66	1179	63	1891	50	14155	0	-13.962	-10.516	2	0	0	2	0	0	0	2.35	61.1253	6.12	7.4	2.04	5.87	0	14.29	3.06	5.61	1.53	3.32	9.44	9.95	1.53	1.79	3.57	7.65	6.38	0	1.02	9.44
ENSMUSG00000004054	ENSMUST00000004156	Map3k11	0.925974	0.783388	0.142587	0.915681	0.901994	0.0136869	-0.1289	0.118606	824	59	2553	61	521	58	13829	0.921	-10.989	-3.704	12	0	0	0	0	0	0	10	42.5206	8.47	9.65	2.12	4.47	1.18	7.29	4.24	9.18	1.53	2.94	9.65	2.82	1.65	2.71	11.29	8.24	4.35	2.47	1.18	4.59
ENSMUSG00000004056	ENSMUST00000108344	Akt2	0.531399	0.24706	0.284339	0.503422	0.35128	0.152142	-0.132197	0.10422	413	65	1446	53	2685	53	49275	1.747	-3.077	-8.342	14	0	0	2	3	0	0	7.01	41.25	5.41	7.28	2.7	6.65	1.46	8.52	3.12	5.82	2.29	4.37	9.15	6.44	3.53	5.41	5.2	5.2	5.82	1.46	3.95	6.24
ENSMUSG00000004069	ENSMUST00000060067	Dnaja3	0.937094	0.440905	0.496189	0.932832	0.686631	0.246202	-0.249987	0.245725	64	73	1443	51	1141	46	23626	0	-4.163	-18.632	12	0	1	6	0	0	0	0	36.3257	7.08	6.67	2.92	5.21	2.5	4.58	5	10.83	1.88	5.21	5.21	6.88	1.67	4.38	5.21	7.29	6.88	0.63	3.33	6.67
ENSMUSG00000004070	ENSMUST00000004172	Hmox2	0.924375	0.732255	0.192121	0.879403	0.82121	0.0581924	-0.133928	0.0889555	145	64	948	50	637	45	40380	1.361	-1.968	-6.603	6	0	1	1	0	0	0	0	39.172	10.16	3.81	4.13	5.08	0.95	9.84	4.76	5.71	2.54	2.22	10.48	8.57	3.17	5.08	3.49	4.76	5.08	0.63	4.44	5.08
ENSMUSG00000004071	ENSMUST00000118703	Cdip1	0.488179	0.502047	-0.0138676	0.541752	0.551645	-0.00989279	0.00397485	0.0495985	230	60	627	57	1697	48	23452	0	-5.436	5.716	6	0	0	4	0	0	0	0	30.9179	6.25	0.96	1.92	2.4	5.77	3.37	3.37	11.06	2.4	3.85	5.77	2.4	3.85	3.85	21.63	3.37	7.21	0	5.29	5.29
ENSMUSG00000004085	ENSMUST00000090824	Map3k20	1	-0.680988	1.68099	0.603656	0.440855	0.162801	-1.51819	1.12184	253	69	2409	48	672	37	156974	0	-0.6	-4.429	20	0	0	2	0	0	0	2.32	34.8315	4.49	6.23	4.11	4.86	1.25	8.1	4.11	5.61	2.87	4.86	8.23	6.86	2.49	4.11	4.99	10.6	5.36	1.87	3.37	5.61
ENSMUSG00000004096	ENSMUST00000004200	Cwc15	0.956201	0.658234	0.297967	0.823255	0.521493	0.301761	0.00379426	-0.136741	173	56	690	45	248	30	9961	0.373	4.94	8.325	7	0	0	0	0	0	0	0	33.3333	7.86	10.48	3.93	10.48	0.44	12.23	4.8	3.49	1.31	3.06	6.55	10.04	1.31	3.49	4.8	5.68	5.68	0.44	1.31	2.62
ENSMUSG00000004098	ENSMUST00000004201	Col5a3									114	65	5220	62	785	54	45018	0	-15.333	-16.458	67	0	1	1	0	0	0	0	38.4925	5.35	4.66	1.38	4.2	0.75	5.81	4.6	24.32	1.32	2.65	7.07	4.89	0.81	2.59	15.87	4.72	3.85	0.58	0.58	4.03
ENSMUSG00000004099	ENSMUST00000004202	Dnmt1	0.593567	0.215006	0.378561	0.709461	0.375137	0.334324	-0.0442364	0.160131	192	62	4863	53	312	39	45771	6.42	-2.709	-15.009	39	0	1	0	0	0	0	0	40.4571	6.17	7.04	3.83	5.86	2.53	8.58	3.83	6.36	2.41	3.52	7.72	7.72	1.85	3.52	6.48	7.35	5.37	1.05	3.15	5.68
ENSMUSG00000004100	ENSMUST00000004203	Ppan	0.887884	0.791799	0.096085	0.919093	0.838166	0.080927	-0.0151579	0.046367	125	63	1413	59	132	54	4004	0.236	-8.456	-15.299	11	0	0	0	0	0	0	0	49.467	7.87	10	4.89	4.04	0.43	6.38	8.09	8.09	2.98	2.77	10	6.6	2.34	2.98	5.53	5.53	4.26	0.21	1.28	5.74
ENSMUSG00000004105	ENSMUST00000004208	Angptl2	0.877345	0.75202	0.125325	0.810828	0.801848	0.00898039	-0.116344	0.0498277	426	61	1482	54	1431	50	31649	0	-5.014	6.296	5	0	1	0	0	0	0	11.36	41.8699	5.07	6.69	6.29	4.26	1.62	6.9	6.29	6.69	3.25	3.65	9.94	4.67	2.43	2.23	5.48	5.68	5.27	2.84	5.27	5.48
ENSMUSG00000004110	ENSMUST00000187541	Cacna1e	-0.278401	-0.0412998	-0.237101	0.865219	0.71857	0.146649	0.383751	0.75987	437	53	6822	52	7662	42	335626	0	-3.261	-19.501	47	0	1	8	0	0	0	5.19	35.2993	6.38	7	3.92	4.14	1.63	6.78	3.78	6.03	2.46	5.68	9.94	4.58	3.52	5.28	4.97	8.84	4.93	1.28	2.73	6.16
ENSMUSG00000004113	ENSMUST00000070864	Cacna1b	-3.65266	-2.8169	-0.835769	-2.55868	-2.13168	-0.427006	0.408763	0.68522	105	79	6867	55	2683	44	159266	0	-5.099	-30.951	46	0	0	3	0	5	0	0	38.4784	7.69	7.26	3.67	4.06	1.66	6.34	3.8	6.69	2.49	4.68	9.7	4.24	3.06	5.86	6.03	7.17	5.59	1.01	2.8	6.21
ENSMUSG00000004127	ENSMUST00000040321	Trmt10a	0.748752	0.647049	0.101703	0.711356	0.636836	0.0745193	-0.0271836	-0.0102124	154	63	993	47	2878	39	16374	0	3.418	0.209	8	0	1	1	0	0	0	0	34.3465	4.85	6.97	3.94	6.97	1.21	9.7	6.97	4.55	3.64	3.94	8.48	10	2.12	2.42	3.94	8.79	2.42	1.52	1.82	5.76
ENSMUSG00000004151	ENSMUST00000095767	Etv1	0.699622	0.525446	0.174176						427	50	1434	50	4715	34	90403	0	2.59	9.049	13	0	2	16	0	0	0	4.87	32.1429	4.61	6.08	3.56	5.66	2.31	7.76	6.29	5.24	3.35	2.52	5.87	4.61	3.77	5.24	11.32	7.34	3.98	0.84	5.24	4.4
ENSMUSG00000004187	ENSMUST00000004294	Kifc2	0.0536679	-0.337366	0.391033	0.536179	0.236769	0.29941	-0.0916234	0.574135	101	78	2379	59	738	52	7631	0	-11.298	-23.994	18	0	0	0	0	0	0	0	39.0645	7.95	7.95	1.52	3.03	1.89	7.7	8.96	9.85	1.77	1.77	14.14	1.39	1.14	1.64	7.07	8.21	6.82	1.01	1.14	5.05
ENSMUSG00000004207	ENSMUST00000179238	Psap	0.194742	0.0892054	0.105537	0.344264	0.167302	0.176962	0.0714254	0.0780968	115	64	1674	54	868	51	24970	0.706	-3.957	-4.719	15	1	0	0	0	0	0	0	39.0288	7.54	1.62	4.49	4.85	5.92	7.36	5.92	3.95	2.15	3.77	10.77	6.82	2.87	2.33	7.18	6.1	3.95	0.9	2.33	9.16
ENSMUSG00000004221	ENSMUST00000164101	Ikbkg	0.59644	0.325963	0.270477	0.495751	0.285009	0.210742	-0.059735	-0.0409546	130	53	1239	54	5419	41	60488	0	-7.265	8.18	10	0	0	12	0	0	0	0	46.7153	8.01	7.04	1.7	4.13	2.18	13.59	12.86	2.18	3.4	2.18	11.89	7.28	3.4	1.94	4.37	6.07	1.7	0.24	1.21	4.61
ENSMUSG00000004221	ENSMUST00000164101	Ikbkg	0.59644	0.325963	0.270477	0.495751	0.285009	0.210742	-0.059735	-0.0409546	130	53	1239	54	5419	41	60488	0	-7.265	8.18	10	0	0	12	0	0	0	0	46.7153	8.01	7.04	1.7	4.13	2.18	13.59	12.86	2.18	3.4	2.18	11.89	7.28	3.4	1.94	4.37	6.07	1.7	0.24	1.21	4.61
ENSMUSG00000004221	ENSMUST00000180230	Ikbkg	0.59644	0.325963	0.270477	0.495751	0.285009	0.210742	-0.059735	-0.0409546	130	53	1236	54	5419	41	60488	0	-7.355	8.18	10	0	0	12	0	0	0	0	46.5854	8.03	7.06	1.7	4.14	2.19	13.63	12.65	2.19	3.41	2.19	11.92	7.3	3.41	1.95	4.38	6.08	1.7	0.24	1.22	4.62
ENSMUSG00000004221	ENSMUST00000180230	Ikbkg	0.59644	0.325963	0.270477	0.495751	0.285009	0.210742	-0.059735	-0.0409546	130	53	1236	54	5419	41	60488	0	-7.355	8.18	10	0	0	12	0	0	0	0	46.5854	8.03	7.06	1.7	4.14	2.19	13.63	12.65	2.19	3.41	2.19	11.92	7.3	3.41	1.95	4.38	6.08	1.7	0.24	1.22	4.62
ENSMUSG00000004233	ENSMUST00000004343	Wars2	-0.110883	0.0862512	-0.197135	0.364974	0.160111	0.204863	0.401998	0.0738594	31	74	1083	51	3296	44	79136	0	-3.348	-8.487	6	0	1	4	0	0	0	0	34.5404	8.06	4.44	1.39	5	1.11	6.39	5	4.44	3.06	5.56	10.83	8.61	2.22	3.06	4.72	8.33	5	1.11	2.22	9.44
ENSMUSG00000004263	ENSMUST00000088357	Atn1	-0.237049	0.0261237	-0.263173	0.501113	0.723505	-0.222393	0.0407806	0.697381	377	71	3528	61	528	53	13981	0.474	-4.495	0.209	10	0	0	1	2	0	1	3.43	41.8228	9.28	5.53	2.3	2.64	0.26	5.45	4.43	8	4.94	1.19	7.23	3.32	1.36	1.62	19.15	13.28	3.74	0.17	2.81	3.32
ENSMUSG00000004264	ENSMUST00000004375	Phb2	0.728857	0.385573	0.343283	0.829006	0.491736	0.33727	-0.00601371	0.106163	101	71	900	56	317	50	4615	1.379	-6.284	-9.791	10	0	0	0	0	0	0	0	41.9463	10.7	8.03	3.68	3.68	0	6.69	7.36	6.35	0.67	7.02	11.04	6.35	1.67	3.34	3.34	6.69	4.01	0.33	2.68	6.35
ENSMUSG00000004266	ENSMUST00000112484	Ptpn6	0.859027	0.370972	0.488055	0.928755	0.568591	0.360164	-0.127891	0.197619	201	61	1788	54	230	52	12448	3.419	-4.56	1.078	16	0	1	1	0	0	0	0	44.7811	4.87	5.88	4.2	5.38	1.01	7.56	6.39	7.56	2.86	5.71	7.39	7.23	1.34	2.86	4.2	7.73	5.55	1.51	4.2	6.55
ENSMUSG00000004267	ENSMUST00000004378	Eno2	0.642164	-0.712866	1.35503	0.100931	0.277385	-0.176455	-1.53148	0.990251	252	72	1305	55	1238	49	9619	0	-7.503	-3.559	12	0	0	5	0	0	0	3.9	39.261	10.37	4.84	4.84	6.91	1.38	7.6	3	8.99	1.38	6.22	9.22	5.99	2.07	3.23	3.46	5.53	3.69	0.92	3	7.37
ENSMUSG00000004268	ENSMUST00000004379	Emg1	0.698308	0.421605	0.276703	0.743341	0.467897	0.275444	-0.00125821	0.0462912	135	54	735	52	164	42	7798	0.525	-2.741	-3.704	6	0	0	0	0	0	0	3.36	36.214	5.33	6.15	2.87	4.51	2.05	5.74	3.69	7.38	2.46	4.51	10.25	6.56	2.87	3.69	5.74	7.79	5.33	0.82	1.64	10.66
ENSMUSG00000004270	ENSMUST00000128721	Lpcat3	0.852162	0.50311	0.349053	0.903512	0.603665	0.299847	-0.0492055	0.100555	37	77	300	56	434	50	39119	0.411	-4.435	-11.82	7	0	0	0	0	0	0	0	40.8163	7.07	5.05	2.02	4.04	1.01	4.04	2.02	8.08	5.05	5.05	18.18	2.02	3.03	8.08	3.03	9.09	5.05	1.01	6.06	1.01
ENSMUSG00000004285	ENSMUST00000004396	Atp6v1f	0.741139	0.313765	0.427374	0.54636	0.225054	0.321306	-0.106068	-0.0887109	99	70	360	53	244	49	2795	0.762	-2.952	-19.212	2	0	0	1	1	0	0	0	44.9153	8.4	7.56	5.04	8.4	0	7.56	2.52	7.56	3.36	10.92	9.24	5.04	2.52	4.2	3.36	2.52	5.04	0	1.68	5.04
ENSMUSG00000004296	ENSMUST00000102796	Il12b									56	57	1008	50	797	38	13971	0	-0.614	1.803	8	0	0	6	0	0	0	0	35.3293	4.18	3.58	4.18	5.07	4.18	8.06	4.48	4.18	1.79	3.88	7.46	8.66	2.09	3.58	4.78	9.55	7.46	2.69	3.28	6.87
ENSMUSG00000004317	ENSMUST00000115746	Clcn5	0.380827	0.345004	0.035823	-0.00201653	0.141385	-0.143401	-0.179224	-0.203619	341	58	2451	48	260	35	159765	0	-1.2	-3.125	15	0	2	0	0	0	0	1.71	27.8528	7.23	4.53	3.55	4.78	2.08	5.02	1.84	8.09	2.45	7.35	10.66	4.04	3.19	5.64	4.29	7.23	5.88	2.33	2.94	6.86
ENSMUSG00000004319	ENSMUST00000056508	Clcn3	0.707921	0.618598	0.0893229	0.535338	0.494864	0.0404736	-0.0488493	-0.123734	612	35	2376	43	2696	38	44845	0.695	1.737	13.832	12	2	3	5	0	0	0	0	21.0127	8.47	4.8	2.91	4.55	2.28	5.18	1.52	7.84	2.02	7.84	9.86	4.55	2.78	5.31	4.8	6.7	5.82	2.4	3.67	6.7
ENSMUSG00000004328	ENSMUST00000037762	Hif3a	0.599496	0.677993	-0.0784966	0.865219	0.788927	0.0762917	0.154788	0.110934	83	61	1989	60	134	61	20946	0	-6.307	-1.82	15	0	0	0	0	0	0	0	42.5113	8.31	8.31	1.81	5.14	1.81	5.89	4.68	5.74	3.47	3.02	12.84	3.63	1.81	2.42	9.97	9.67	5.29	0.76	1.81	3.63
ENSMUSG00000004347	ENSMUST00000044505	Pde1c									547	58	2121	46	1239	40	292589	0	2.196	9.774	19	0	0	0	0	0	0	0	31.0638	7.08	5.95	3.82	5.81	0.28	7.93	3.97	4.39	3.26	5.1	7.93	9.35	2.69	3.26	4.11	9.49	6.09	1.42	2.55	5.52
ENSMUSG00000004356	ENSMUST00000004470	Utp20	0.582659	0.266878	0.315781	0.410269	0.140084	0.270184	-0.045597	-0.126794	154	65	8370	46	297	42	80198	2.59	1.013	1.223	62	0	11	0	0	0	0	4.03	28.3716	6.96	4.95	3.16	4.3	1.69	8.14	4.48	3.55	2.94	5.38	14.52	8.03	2.19	4.34	3.94	6.74	4.7	0.75	2.51	6.74
ENSMUSG00000004359	ENSMUST00000004473	Spic	-0.0714838	-0.0869246	0.0154408	0.430456	0.271991	0.158465	0.143024	0.358916	142	46	729	46	892	43	8252	0	2.969	15.136	6	0	0	0	0	0	0	0	29.0456	6.61	6.61	6.61	3.72	1.65	4.96	9.09	7.85	2.07	5.37	8.26	4.55	2.48	4.13	4.13	7.02	3.31	1.65	7.02	2.89
ENSMUSG00000004360	ENSMUST00000092627	9330159F19Rik	0.699622	0.727157	-0.0275353	0.603656	0.54332	0.0603361	0.0878713	-0.183838	326	49	1947	44	3408	35	19174	0	4.955	6.296	6	0	2	8	0	0	0	5.09	27.2025	5.09	6.48	6.17	5.56	2.01	8.18	5.25	3.4	2.62	3.09	7.87	8.02	2.01	2.78	6.48	10.8	6.48	1.54	2.16	4.01
ENSMUSG00000004364	ENSMUST00000163119	Cul3	0.766525	0.661954	0.104571	0.58477	0.446137	0.138633	0.0340623	-0.215817	169	85	2307	39	2233	33	75558	2.644	7.57	-11.096	16	0	4	11	0	0	0	1.43	21.1213	4.69	7.03	4.95	4.82	1.43	8.98	5.08	5.08	2.47	5.21	9.38	7.81	4.17	4.3	2.47	5.73	5.73	0.39	3.13	7.16
ENSMUSG00000004371	ENSMUST00000094892	Il11									155	72	600	60	1194	44	5769	0	-7.948	-10.516	5	0	0	8	0	0	0	0	28.2828	11.06	10.05	0.5	6.03	1.01	1.51	4.02	7.04	2.01	1.51	21.61	1.51	2.51	0.5	8.54	7.54	4.02	2.01	0.5	6.53
ENSMUSG00000004383	ENSMUST00000212459	Large1	-0.357557	-0.10936	-0.248197	0.164198	0.327947	-0.163749	0.0844475	0.437307	1250	66	2271	51	1225	43	538942	0	-1.626	3.397	16	0	3	0	0	0	0	0	34.3046	6.75	6.61	4.5	4.63	1.59	7.14	4.37	4.37	3.31	3.97	11.51	5.03	2.78	5.03	3.97	6.22	5.03	2.12	4.63	6.48
ENSMUSG00000004393	ENSMUST00000004507	Ddx56	0.931889	0.137977	0.793912	0.845505	0.145937	0.699569	-0.0943434	0.0079595	53	64	1641	54	262	51	8854	0	-5.388	-5.299	14	0	1	0	0	0	0	0	37.2477	8.97	7.33	2.38	4.76	1.28	6.96	5.49	5.49	2.93	3.3	14.65	6.78	1.65	3.85	6.41	5.13	3.48	0.18	2.01	6.96
ENSMUSG00000004394	ENSMUST00000004508	Tmed4	0.843616	0.729565	0.114051	0.661206	0.444073	0.217133	0.103082	-0.285492	37	58	684	56	1282	44	4502	0	-5.291	-9.646	5	0	0	2	0	0	0	0	42.0354	5.29	7.05	2.2	3.96	1.76	7.49	7.05	7.93	3.52	5.29	10.13	5.29	3.08	4.41	3.08	4.41	6.17	1.76	2.64	7.49
ENSMUSG00000004446	ENSMUST00000160684	Bid	0.636827	0.129678	0.507149	0.767772	0.436275	0.331497	-0.175653	0.306597	157	63	588	52	1670	48	24907	0	-3.562	-16.603	7	0	0	0	0	0	0	0	40.2062	7.69	5.64	6.15	7.18	1.03	9.23	6.15	5.13	3.08	4.62	11.28	3.08	4.1	4.1	2.56	7.69	4.1	0.51	1.03	5.64
ENSMUSG00000004451	ENSMUST00000004565	Ralb	0.850762	0.545448	0.305314	0.244341	0.335584	-0.0912426	-0.396556	-0.209865	267	69	621	53	1401	46	34490	0	-6.04	-15.299	5	0	0	4	0	0	0	1.98	44.878	6.8	6.31	2.91	6.8	0.97	10.68	3.4	6.8	0.97	3.88	7.28	10.68	2.43	4.85	1.46	7.77	3.88	0.49	2.91	8.74
ENSMUSG00000004455	ENSMUST00000128309	Ppp1cc	0.928415	0.609187	0.319229	0.864319	0.568137	0.296182	-0.023047	-0.0410498	205	79	822	46	1465	45	16914	1.41	-1.324	-19.501	6	0	0	2	0	0	0	0	27.9412	3.3	5.86	3.66	7.69	4.4	6.59	3.66	7.69	3.3	7.33	14.65	5.49	1.1	5.13	4.4	4.03	2.56	1.1	3.66	4.4
ENSMUSG00000004460	ENSMUST00000178320	Dnajb11	0.840228	0.53923	0.300998	0.58106	0.302136	0.278923	-0.0220744	-0.237094	197	74	1077	49	354	42	14621	2.126	-0.94	-9.067	11	0	0	0	0	0	0	0	33.0532	3.91	6.42	3.91	7.26	1.4	8.1	5.31	9.5	2.51	5.59	8.38	7.26	1.68	5.03	5.31	3.35	4.19	0.28	3.07	7.54
ENSMUSG00000004462	ENSMUST00000232075	Tbccd1	0.674595	0.199794	0.474801	0.724861	0.498427	0.226434	-0.248367	0.298633	216	55	1659	49	770	43	44448	0	-0.522	0.354	8	0	0	0	0	0	0	0	30.49	7.43	5.62	2.72	2.17	2.17	6.88	4.53	3.44	4.35	3.62	12.32	5.07	1.81	4.17	5.98	9.78	6.7	2.36	3.08	5.8
ENSMUSG00000004473	ENSMUST00000004587	Clec11a	1	0.81703	0.18297						137	56	987	62	1854	46	4216	0	-12.575	-11.675	4	0	0	4	0	0	0	0	46.4832	9.76	7.62	2.74	5.49	1.83	10.06	6.1	8.84	3.05	0.61	11.89	1.83	0.91	3.35	5.79	6.4	4.27	2.74	1.52	5.18
ENSMUSG00000004500	ENSMUST00000038701	Zfp324	0.956181	0.887979	0.0682024	0.797352	0.608334	0.189018	0.120815	-0.279645	378	60	1752	57	2185	47	7985	0.88	-7.035	-29.936	4	0	1	2	0	0	0	0	41.4089	8.75	8.92	2.23	2.23	3.6	5.83	4.97	8.06	5.83	2.92	7.38	4.12	1.2	3.95	8.23	9.43	5.15	1.2	1.54	4.46
ENSMUSG00000004508	ENSMUST00000004622	Gab2	-1.44042	-0.998341	-0.442077	-1.25165	-1.25197	0.000315138	0.442392	-0.253629	240	81	2001	53	3927	47	227361	0	0.079	-31.82	10	0	0	6	1	0	0	0	38.3459	5.56	5.86	4.95	5.26	1.35	5.11	4.65	5.41	2.7	3	6.46	5.26	1.95	2.7	9.61	14.41	7.06	1.2	2.85	4.65
ENSMUSG00000004508	ENSMUST00000004622	Gab2	-1.44042	-0.998341	-0.442077	-1.25165	-1.25197	0.000315138	0.442392	-0.253629	240	81	2001	53	3927	47	227361	0	0.079	-31.82	10	0	0	6	1	0	0	0	38.3459	5.56	5.86	4.95	5.26	1.35	5.11	4.65	5.41	2.7	3	6.46	5.26	1.95	2.7	9.61	14.41	7.06	1.2	2.85	4.65
ENSMUSG00000004508	ENSMUST00000206791	Gab2	-1.44042	-0.998341	-0.442077	-1.25165	-1.25197	0.000315138	0.442392	-0.253629	50	78	1998	53	17	64	223261	0	0.03	-31.82	10	0	0	0	0	0	0	0	38.253	5.56	5.86	4.96	5.26	1.35	5.11	4.66	5.41	2.71	3.01	6.47	5.26	1.95	2.71	9.62	14.29	7.07	1.2	2.86	4.66
ENSMUSG00000004508	ENSMUST00000206791	Gab2	-1.44042	-0.998341	-0.442077	-1.25165	-1.25197	0.000315138	0.442392	-0.253629	50	78	1998	53	17	64	223261	0	0.03	-31.82	10	0	0	0	0	0	0	0	38.253	5.56	5.86	4.96	5.26	1.35	5.11	4.66	5.41	2.71	3.01	6.47	5.26	1.95	2.71	9.62	14.29	7.07	1.2	2.86	4.66
ENSMUSG00000004530	ENSMUST00000004646	Coro1c	0.82548	0.60655	0.218931	0.754394	0.535752	0.218642	-0.000288834	-0.0707978	153	79	1425	54	1913	51	66323	0.849	-2.364	-7.472	11	0	1	1	0	0	0	0	42.9175	6.96	5.27	4.43	6.75	2.53	6.54	2.95	5.91	2.53	7.59	7.38	7.59	2.53	3.16	5.49	7.17	4.43	1.69	2.32	6.75
ENSMUSG00000004535	ENSMUST00000080723	Tax1bp1	0.883091	0.548826	0.334265	0.771791	0.301119	0.470673	0.136407	-0.247707	134	70	2445	42	706	34	53052	2.333	5.283	-8.632	18	0	1	4	0	0	0	0	24.3542	6.39	4.05	4.3	5.9	2.33	11.79	7	3.19	2.83	2.58	10.32	9.09	1.84	3.32	3.93	6.14	5.53	0.74	2.83	5.9
ENSMUSG00000004540	ENSMUST00000004655	Psg17									192	53	1428	48	480	42	7671	0	0.851	-2.98	5	0	1	1	0	0	0	0	24.4726	4.63	5.05	4.42	2.95	1.89	5.47	4.21	5.68	2.11	4.63	12.63	3.37	1.26	2.95	4.63	9.68	8.84	1.68	4	9.89
ENSMUSG00000004552	ENSMUST00000073350	Ctse	0.507255	0.175136	0.332119	0.295766	0.174966	0.1208	-0.211319	-0.00017029	372	50	1194	53	560	41	37200	3.693	-2.817	-2.98	10	0	0	2	0	0	0	1.91	30.8081	5.54	2.27	4.03	5.79	1.76	3.78	6.05	10.08	1.76	5.29	10.58	2.02	2.27	5.04	7.05	8.06	6.3	1.26	3.53	7.56
ENSMUSG00000004558	ENSMUST00000004673	Ndrg2	0.756414	0.245372	0.511042	0.773365	0.28154	0.491825	-0.0192173	0.0361679	114	71	1116	53	869	49	8160	0	-0.68	-8.052	16	0	0	1	2	0	0	3.27	34.5946	6.47	4.04	3.77	4.31	1.62	6.47	5.66	8.36	2.43	5.12	9.97	3.5	3.23	3.5	6.74	8.36	6.74	0.81	3.77	5.12
ENSMUSG00000004561	ENSMUST00000165100	Mettl17	0.832699	0.249913	0.582786	0.881323	0.364745	0.516578	-0.0662082	0.114832	57	55	711	55	662	53	6905	0	-6.496	-6.023	13	0	1	0	0	0	0	0	34.0426	11.44	8.47	0.85	2.97	1.27	7.2	5.51	5.51	3.81	1.69	13.14	4.66	2.54	4.24	5.93	6.78	3.81	1.69	2.97	5.51
ENSMUSG00000004562	ENSMUST00000093813	Arhgef40	-0.646138	-2.24015	1.59401	0.840396	0.0895428	0.750853	-0.84316	2.32969	151	76	4554	59	916	48	21414	0	-9.689	-6.458	24	0	0	2	0	0	0	0	38.3905	9.16	7.71	0.99	3.43	1.91	10.09	6.06	8.24	2.18	1.78	13.25	2.97	0.86	2.31	8.77	8.37	4.61	1.19	1.05	5.08
ENSMUSG00000004565	ENSMUST00000004681	Pnpla6	-0.0801436	-0.240697	0.160554	0.402961	0.419457	-0.0164957	-0.17705	0.660154	215	56	3984	56	239	52	28884	0	-6.511	-6.023	34	0	0	0	0	0	0	2.03	36.6516	7.16	7.84	1.58	5.12	1.81	6.18	4.45	7.54	2.11	4.22	11.3	3.77	2.19	2.94	6.1	8.29	5.88	1.06	2.56	7.91
ENSMUSG00000004567	ENSMUST00000004683	Mcoln1	-0.242529	-0.761094	0.518565	0.568979	0.282827	0.286152	-0.232413	1.04392	140	74	1743	54	182	46	14776	0	-6.117	-29.067	14	0	0	1	0	0	1	1.65	35.924	5.17	5.86	3.1	5	3.45	3.97	3.62	6.55	2.41	6.55	12.24	3.45	1.72	6.21	4.31	7.76	6.21	1.21	4.31	6.9
ENSMUSG00000004568	ENSMUST00000004684	Arhgef18	-0.50528	-0.427766	-0.0775134	0.470543	0.512664	-0.0421208	0.0353926	0.94043	139	68	3066	56	2066	49	63564	1.17	-6.872	-5.878	20	0	1	3	0	0	0	0	44.5098	7.93	7.25	1.86	4.8	1.08	9.79	8.52	5.68	1.47	3.72	10.58	6.17	1.86	2.94	5.09	9.79	3.82	0.69	1.67	5.29
ENSMUSG00000004591	ENSMUST00000043812	Pkn2	0.752786	0.465251	0.287536	0.698239	0.366535	0.331704	0.0441683	-0.0987157	346	76	2952	42	2909	35	91103	2.275	4.086	-33.704	22	0	2	5	0	0	0	7.11	23.8289	5.6	6.71	4.17	6.92	1.53	7.83	4.17	4.68	1.93	4.07	10.58	6.71	2.34	4.48	5.49	8.04	5.29	1.12	1.73	6.61
ENSMUSG00000004609	ENSMUST00000039861	Cd33									298	52	1005	52	488	43	16055	0	-3.543	-8.487	8	0	1	1	0	0	0	0	29.7297	3.89	4.49	1.8	3.89	2.99	4.79	5.99	5.99	2.69	3.29	11.68	5.09	2.1	4.19	7.19	9.88	8.38	1.2	1.8	8.68
ENSMUSG00000004610	ENSMUST00000004729	Etfb	0.867649	0.372417	0.495232	0.510583	0.253378	0.257205	-0.238026	-0.119039	65	59	768	56	60	49	13718	0.756	-6.774	-12.545	6	0	0	0	0	0	0	0	42.5197	9.8	5.1	1.57	5.88	1.57	8.63	3.92	7.06	0.78	5.49	10.2	10.2	1.96	1.57	4.31	3.92	5.1	0.39	0.39	12.16
ENSMUSG00000004612	ENSMUST00000070518	Nkg7	0.340836	-0.170666	0.511501	0.910146	-0.401134	1.31128	0.799778	-0.230468	231	52	498	54	152	47	1177	0	-3.674	6.006	4	0	0	0	0	0	0	2.77	20.7317	10.3	3.64	0	0.61	3.03	2.42	3.64	6.67	2.42	4.24	13.33	0	2.42	7.88	4.24	13.33	7.88	3.64	2.42	7.88
ENSMUSG00000004626	ENSMUST00000160708	Stxbp2	-0.294717	-0.897715	0.602998	0.332166	-0.0346245	0.366791	-0.236207	0.86309	213	64	1782	55	913	46	12690	1.952	-5.812	-17.183	19	0	1	1	0	0	0	2.35	40.8784	8.6	5.56	1.85	6.24	1.35	7.42	3.37	4.89	2.7	5.23	12.31	7.08	2.53	2.53	5.06	7.42	5.4	1.01	3.04	6.41
ENSMUSG00000004631	ENSMUST00000115577	Sgce									88	58	1422	46	266	34	72827	0	-0.147	2.817	12	0	2	1	0	0	0	0	29.0254	5.29	4.86	4.65	4.86	1.69	5.92	4.02	6.13	2.11	5.29	8.46	5.5	2.96	4.23	7.4	6.34	7.19	2.11	3.81	7.19
ENSMUSG00000004633	ENSMUST00000046856	Chn2	0.629315	0.393799	0.235516	0.50141	0.367412	0.133998	-0.101518	-0.0263874	534	72	1407	49	477	37	261149	0.938	0.989	-10.081	13	0	2	0	0	0	0	3.36	34.6895	5.98	6.62	4.91	4.91	2.35	8.12	2.99	4.91	4.06	7.26	9.19	6.2	2.35	3.21	4.49	6.2	5.34	0.64	4.91	5.34
ENSMUSG00000004637	ENSMUST00000004756	Wwox	0.364003	0.0144098	0.349594	0.387142	-0.0182618	0.405404	0.0558102	-0.0326716	117	70	1245	56	882	47	913054	0	-4.348	-15.733	9	0	2	0	0	0	0	0	38.9831	8.45	6.76	4.35	5.07	1.93	6.76	3.14	6.28	3.38	2.42	10.39	4.35	1.93	3.86	4.11	7.73	7.25	2.17	3.14	6.52
ENSMUSG00000004642	ENSMUST00000057551	Slbp	0.926315	0.681606	0.244709	0.906185	0.655411	0.250774	0.00606505	-0.0261946	321	65	828	49	757	35	12520	0.21	1.9	-3.559	8	0	1	2	0	0	0	0	33.9416	5.45	10.55	2.18	8	1.82	9.82	4	5.45	2.18	2.91	4.73	6.55	2.18	2.91	6.91	10.91	4.73	1.82	2.55	4.36
ENSMUSG00000004651	ENSMUST00000004770	Tyr	0.812876	0.869886	-0.0570097	0.787835	0.579224	0.20861	0.26562	-0.290662	162	39	1602	45	4278	30	68742	0	0.119	9.919	5	0	0	22	0	0	0	1.41	23.8722	5.07	5.07	5.25	5.82	3.19	5.07	3.94	7.13	3	4.5	10.32	3.38	2.25	6.19	6.57	9.57	3.56	2.44	4.32	3.38
ENSMUSG00000004655	ENSMUST00000004774	Aqp1	0.695941	0.677993	0.0179484	0.768491	0.822655	-0.0541639	-0.0721123	0.144662	59	60	810	57	1758	52	12124	0	-8.266	2.528	4	0	0	2	0	0	4	0	39.1791	10.04	4.83	4.09	4.83	1.49	2.6	2.97	9.29	1.86	8.55	13.01	2.6	1.86	4.46	2.6	8.55	4.83	1.49	1.86	8.18
ENSMUSG00000004661	ENSMUST00000114165	Arid3b	0.331418	0.248992	0.082426	0.456215	0.523446	-0.0672306	-0.149657	0.274453	74	59	639	53	1231	56	44056	0	-3.586	-6.023	9	0	0	1	0	0	0	0	35.545	8.96	4.72	1.89	6.13	0.47	8.49	12.74	7.08	0.94	0.94	8.02	5.19	2.36	1.42	9.91	9.43	4.25	0.94	0.94	5.19
ENSMUSG00000004665	ENSMUST00000004784	Cnn2	0.386402	0.229099	0.157303	0.319801	0.330151	-0.0103498	-0.167653	0.101052	94	82	918	57	1448	49	7479	0.588	-6.339	-6.893	7	0	0	1	0	0	0	0	48.3553	6.89	2.95	5.25	5.25	2.62	4.26	7.54	11.15	1.64	3.61	8.52	6.89	4.59	2.3	4.59	7.87	5.25	0.66	4.26	3.93
ENSMUSG00000004667	ENSMUST00000004786	Polr2e	0.902971	0.24569	0.657282	0.796258	0.260465	0.535794	-0.121488	0.0147753	156	69	633	57	359	53	3847	0.409	-7.551	-5.009	7	0	0	0	0	0	0	0	48.8038	4.29	7.62	1.43	5.71	0.95	10	8.1	4.29	1.9	6.19	9.05	6.19	3.33	3.33	5.24	2.38	7.14	0.48	3.81	8.57
ENSMUSG00000004668	ENSMUST00000042740	Abca13									24	70	15105	43	882	37	492318	0		-1.965	62	0	20	2	0	0	0	0	24.1009	5.13	3.66	5.07	4.65	1.63	5.4	4.89	5.13	3.18	5.88	13.65	4.79	2.6	5.66	3.95	9.14	5.96	1.61	2.42	5.62
ENSMUSG00000004677	ENSMUST00000170242	Myo9b	0.409076	-0.0610626	0.470138	0.602337	0.40988	0.192457	-0.277682	0.470943	171	73	6387	55	739	50	87999	4.28	-5.229	-20.516	40	0	2	0	1	0	0	0	43.2064	7.19	6.58	2.96	4.32	1.27	8.27	5.64	5.17	2.87	4.32	10.76	7.14	1.74	3.2	5.83	8.41	4.89	0.8	2.96	5.69
ENSMUSG00000004698	ENSMUST00000209902	Hdac9	-0.817326	-0.820257	0.00293142	-0.519641	-0.667934	0.148293	0.145361	0.152324	24	54	3195	51	4721	39	480749	0	-1.283	10.354	25	0	0	13	0	0	0	0	32.9257	8.08	4.7	2.82	4.32	1.22	7.52	8.08	6.67	3.85	3.48	11.18	5.36	2.26	1.97	6.77	9.68	4.51	0.47	1.5	5.55
ENSMUSG00000004707	ENSMUST00000004827	Ly9	0.763182	0.431051	0.332131	0.565716	0.205443	0.360272	0.0281409	-0.225608	35	33	1635	50	428	48	18727	0	1.326	11.223	9	0	1	0	0	0	4	0	32.4125	5.33	5.15	3.68	4.96	2.39	6.25	5.88	4.6	2.39	3.49	7.9	5.7	2.39	2.39	6.07	10.29	9.01	1.84	3.31	6.99
ENSMUSG00000004709	ENSMUST00000004829	Cd244a	0.745043	0.650584	0.0944591						132	54	1194	47	2434	44	26126	0.929	0.345	-9.212	9	0	0	3	0	0	0	0	31.3131	3.78	5.29	5.79	4.79	3.02	4.53	6.8	6.05	2.27	4.03	8.82	5.79	0.76	4.03	4.28	11.34	6.05	2.27	3.27	7.05
ENSMUSG00000004730	ENSMUST00000086763	Adgre1	-2.82436	-0.200163	-2.6242	-4.20047	-3.69585	-0.504614	2.11958	-3.49569	35	44	2796	48	407	34	124837	0.954	-0.956	2.093	22	0	0	2	0	0	0	0	27.4194	4.83	2.79	5.05	4.3	6.87	5.26	3.97	7.52	1.72	6.12	10.42	3.44	2.47	5.05	3.33	9.45	7.73	1.5	2.47	5.69
ENSMUSG00000004748	ENSMUST00000004868	Mtfp1	1	1	0						163	56	501	60	747	49	3966	0	-9.315	-8.777	4	0	0	1	0	0	0	0	41.8182	9.64	6.63	1.81	4.82	0.6	4.22	2.41	6.02	1.2	4.22	10.24	3.61	1.81	2.41	6.63	9.04	7.23	3.01	4.22	10.24
ENSMUSG00000004768	ENSMUST00000115174	Rab23	0.968214	0.932585	0.0356286	0.970641	0.944632	0.0260088	-0.00961973	0.0120469	335	48	714	45	3169	44	22155	0	2.736	-4.139	8	0	0	3	0	0	0	2.02	30.9322	5.91	5.91	5.06	6.33	1.69	8.02	5.06	5.49	1.27	5.49	7.59	8.44	2.11	3.8	2.11	8.44	5.06	0.84	2.53	8.86
ENSMUSG00000004768	ENSMUST00000115174	Rab23	0.968214	0.932585	0.0356286	0.970641	0.944632	0.0260088	-0.00961973	0.0120469	335	48	714	45	3169	44	22155	0	2.736	-4.139	8	0	0	3	0	0	0	2.02	30.9322	5.91	5.91	5.06	6.33	1.69	8.02	5.06	5.49	1.27	5.49	7.59	8.44	2.11	3.8	2.11	8.44	5.06	0.84	2.53	8.86
ENSMUSG00000004768	ENSMUST00000088287	Rab23	0.968214	0.932585	0.0356286	0.970641	0.944632	0.0260088	-0.00961973	0.0120469	436	60	714	45	3172	44	22670	0	2.736	-4.139	8	0	0	3	0	0	0	2.02	30.9322	5.91	5.91	5.06	6.33	1.69	8.02	5.06	5.49	1.27	5.49	7.59	8.44	2.11	3.8	2.11	8.44	5.06	0.84	2.53	8.86
ENSMUSG00000004768	ENSMUST00000088287	Rab23	0.968214	0.932585	0.0356286	0.970641	0.944632	0.0260088	-0.00961973	0.0120469	436	60	714	45	3172	44	22670	0	2.736	-4.139	8	0	0	3	0	0	0	2.02	30.9322	5.91	5.91	5.06	6.33	1.69	8.02	5.06	5.49	1.27	5.49	7.59	8.44	2.11	3.8	2.11	8.44	5.06	0.84	2.53	8.86
ENSMUSG00000004771	ENSMUST00000167569	Rab11a	0.855151	0.735197	0.119954	0.773838	0.485452	0.288385	0.168431	-0.249745	119	75	261	42	346	35	21240	0.911	3.848	-1.82	3	0	0	1	0	0	0	0	34.1176	3.49	4.65	8.14	6.98	2.33	8.14	5.81	2.33	1.16	6.98	4.65	5.81	3.49	3.49	5.81	8.14	8.14	0	3.49	6.98
ENSMUSG00000004788	ENSMUST00000004910	Eif2b2	0.889129	0.348816	0.540313	0.868609	0.491559	0.37705	-0.163263	0.142743	81	53	1056	55	468	51	7148	0	-4.914	-7.762	8	0	0	0	0	0	0	0	41.1429	8.83	5.98	3.42	3.99	1.14	9.4	1.99	6.84	4.56	6.84	9.69	4.27	3.42	4.27	4.27	6.84	5.7	0.28	1.71	6.55
ENSMUSG00000004789	ENSMUST00000221357	Dlst	0.57245	0.356579	0.215871	0.606848	0.266541	0.340307	0.124437	-0.0900387	60	76	1365	51	834	50	24009	3.312	-1.965	-4.719	16	0	0	0	0	0	0	0	29.5806	11.89	6.83	3.74	4.63	1.32	6.17	2.86	6.39	1.32	4.85	6.61	5.73	3.08	3.74	8.59	5.73	5.51	0.22	1.32	9.47
ENSMUSG00000004791	ENSMUST00000004913	Pgf									333	57	477	50	772	55	10658	0	-3.592	0.788	7	0	0	2	0	0	0	5.29	32.4841	3.8	6.33	3.8	3.16	5.7	8.23	3.16	5.06	3.16	4.43	8.86	5.7	3.16	3.8	6.96	7.59	5.7	0.63	2.53	8.23
ENSMUSG00000004798	ENSMUST00000004920	Ulk2	0.609657	0.175993	0.433664	0.618661	0.458459	0.160202	-0.273462	0.282466	497	78	3114	48	2132	36	79425	0	-0.666	-26.603	27	0	2	4	0	0	0	9.41	26.1583	6.94	5.3	3.47	3.76	2.8	4.73	5.4	6.65	2.99	3.76	8.87	4.92	2.6	2.99	7.81	11.76	5.59	0.39	2.7	6.56
ENSMUSG00000004814	ENSMUST00000004936	Ccl24									77	53	360	52	858	49	3113	0	-1.815	-3.994	3	0	0	0	0	0	0	0	40.678	9.24	5.04	3.36	2.52	5.88	1.68	4.2	5.88	1.68	9.24	6.72	10.92	0.84	3.36	5.04	8.4	5.88	0.84	0.84	8.4
ENSMUSG00000004815	ENSMUST00000053913	Dgkq	0.505175	0.34432	0.160855	0.600179	0.423561	0.176619	0.0157639	0.0792404	116	68	2805	57	2017	46	14119	0	-10.369	-32.675	23	0	0	2	0	0	0	0	37.299	7.28	7.07	2.36	4.71	3.43	6.1	4.07	8.35	2.89	3.43	9.96	3.85	1.61	3.53	6.42	7.6	5.03	1.39	1.61	9.31
ENSMUSG00000004837	ENSMUST00000004959	Grap	0.837557	0.0986667	0.738891	0.89449	0.289336	0.605154	-0.133737	0.190669	82	58	654	57	926	54	19520	0.754	-7.793	-29.067	5	0	0	0	0	0	0	0	43.0556	6.45	8.29	3.69	5.07	0.92	8.76	5.53	5.99	2.3	3.69	8.76	5.07	1.38	6.91	4.61	7.83	2.76	2.3	3.69	5.99
ENSMUSG00000004843	ENSMUST00000004965	Chmp2b	0.922789	0.480795	0.441993	0.659761	0.524931	0.134831	-0.307163	0.0441355	218	69	642	44	1012	36	23599	0.656	6.174	-18.632	6	0	0	4	0	0	0	0	32.0755	8.92	4.69	3.76	6.57	0.47	8.92	7.51	3.29	0.47	6.1	6.57	12.21	7.04	1.88	1.41	7.51	7.51	0	0	5.16
ENSMUSG00000004846	ENSMUST00000004968	Plod3	0.511163	0.104979	0.406184	0.702522	0.306521	0.396001	-0.0101835	0.201542	667	63	2226	56	387	48	9630	0	-6.798	-34.574	19	0	0	0	0	0	0	5.04	39.1892	5.13	6.75	3.78	6.21	1.35	6.34	4.72	7.29	3.24	2.97	11.61	3.51	2.02	4.45	6.88	5.26	4.72	2.16	4.59	7.02
ENSMUSG00000004849	ENSMUST00000111080	Ap1s1	0.559513	0.36782	0.191693	0.639472	0.544613	0.0948587	-0.0968344	0.176793	125	67	477	52	751	55	11143	0	-5.511	-16.603	5	0	0	0	0	0	0	0	38.2166	5.06	6.33	1.27	6.33	2.53	10.13	4.43	3.8	0.63	4.43	14.56	8.86	5.06	5.7	1.27	5.7	1.9	1.27	4.43	6.33
ENSMUSG00000004864	ENSMUST00000233984	Mapk13									113	82	1101	55	1723	51	10937	0	-4.421	-11.386	12	0	0	0	0	0	0	0	43.8356	7.65	4.92	1.64	6.56	0.82	6.28	5.19	4.92	3.28	4.64	10.66	9.02	3.55	4.92	4.64	5.74	4.92	1.37	3.83	5.46
ENSMUSG00000004865	ENSMUST00000233129	Srpk1	0.590018	0.255781	0.334237	0.70668	0.326297	0.380383	0.0461457	0.0705161	39	70	843	48	99	36	21748	2.535	-1.932	-14.719	9	0	1	0	0	0	0	0	32.9749	5.36	4.64	3.21	5.71	2.5	6.43	5.36	7.14	4.64	6.07	8.57	8.57	2.14	2.14	5.36	6.79	3.93	1.79	2.5	7.14
ENSMUSG00000004872	ENSMUST00000004994	Pax3									89	58	1455	56	1534	39	95572	0	-2.952	-4.719	9	0	3	7	0	0	1	0	43.0642	5.79	7.02	3.1	3.72	1.45	6.4	5.37	7.44	3.1	4.34	6.82	4.34	2.27	2.48	9.92	10.33	7.02	0.62	3.51	4.96
ENSMUSG00000004880	ENSMUST00000005003	Lbr	0.606095	0.236742	0.369353	0.379097	0.112529	0.266568	-0.102786	-0.124212	106	66	1881	50	1523	32	27045	1.975	-2.303	-2.255	14	0	3	3	0	0	0	0	29.92	6.39	7.19	2.56	3.04	1.6	6.23	3.04	6.55	2.56	4.15	13.58	5.59	1.92	4.95	6.23	7.67	3.35	1.92	4.63	6.87
ENSMUSG00000004885	ENSMUST00000005019	Crabp2									175	50	417	50	339	48	4711	0	1.245	4.701	4	0	0	2	0	0	0	0	37.2263	5.07	5.8	5.8	3.62	2.17	11.59	2.17	5.8	0	5.8	5.8	8.7	5.07	3.62	2.9	5.8	8.7	2.17	1.45	7.97
ENSMUSG00000004891	ENSMUST00000090973	Nes									110	63	5595	54	421	54	9359	0	-6.282	-8.052	4	0	3	0	0	0	0	0	39.0231	6.65	5.36	2.31	4.99	0.59	18.72	7.62	7.4	1.66	1.77	10.94	3.97	0.91	1.5	6.71	8.1	3.86	1.29	0.38	5.26
ENSMUSG00000004895	ENSMUST00000005015	Prcc	0.943933	0.549488	0.394446	0.924015	0.606655	0.317359	-0.0770861	0.0571678	266	60	1476	57	357	49	26706	0	-4.63	-16.313	7	0	1	0	0	0	0	3.46	40.8163	10.18	3.05	2.04	5.5	0	8.15	4.89	8.35	0.61	2.04	8.76	6.92	1.43	3.05	15.68	7.33	4.89	0.61	2.85	3.67
ENSMUSG00000004896	ENSMUST00000005016	Rrnad1	0.663022	0.299065	0.363957	0.865614	0.6924	0.173214	-0.190743	0.393335	178	55	1428	57	886	43	7240	0	-8.523	6.006	8	0	0	1	0	0	0	0	36.0759	7.37	7.37	1.26	3.37	2.53	7.16	5.26	6.53	4.42	2.11	17.05	4	1.89	2.95	6.74	5.89	4.63	1.05	2.11	6.32
ENSMUSG00000004897	ENSMUST00000162631	Hdgf	0.720188	0.224175	0.496014	0.429199	0.28832	0.140879	-0.355135	0.0641449	123	50	255	55	385	58	7598	1.379	-6.648	-7.038	6	0	0	0	0	0	0	0	46.988	8.33	3.57	4.76	1.19	0	9.52	2.38	8.33	2.38	1.19	7.14	10.71	1.19	8.33	10.71	5.95	4.76	1.19	3.57	4.76
ENSMUSG00000004902	ENSMUST00000112682	Slc25a18									255	52	963	57	693	46	20759	0	-7.446	-11.675	10	0	0	2	0	0	0	1.83	37.931	10.94	5.94	2.19	3.44	3.44	3.13	5	10.31	0.94	5.94	11.88	4.69	3.44	3.75	3.44	5.63	7.81	0.31	2.19	5.63
ENSMUSG00000004929	ENSMUST00000005057	Thop1	0.741792	0.255501	0.486291	0.794851	0.643928	0.150923	-0.335368	0.388427	228	70	2064	58	540	56	12525	0	-8.243	-11.386	13	0	0	0	0	0	0	0	47.9592	8.73	5.68	2.62	5.68	2.04	8.59	5.68	5.53	2.77	2.47	11.64	6.11	2.77	4.08	4.66	5.09	5.09	1.02	3.78	5.97
ENSMUSG00000004931	ENSMUST00000220297	Apba3	0.860997	0.417749	0.443248	0.8044	0.773326	0.0310737	-0.412174	0.355577	436	52	1716	63	116	40	6277	0	-12.449	-2.255	12	0	0	1	0	0	0	0	46.6667	9.46	5.95	1.75	4.73	2.1	7.18	6.48	8.93	2.63	4.55	9.98	1.4	2.28	1.58	9.46	7.71	5.6	0.53	1.05	6.65
ENSMUSG00000004933	ENSMUST00000119547	Matk	0.225475	-0.0460085	0.271484	0.55829	0.459265	0.0990249	-0.172459	0.505274	395	59	1398	58	123	51	10051	0	-11.518	-18.487	13	0	0	0	0	0	0	0	43.9655	8.82	6.67	1.72	4.3	2.15	7.74	3.87	8.6	3.44	2.58	11.18	6.88	2.58	3.01	4.95	6.45	3.66	1.72	2.15	7.53
ENSMUSG00000004934	ENSMUST00000005064	Pias4	0.921468	0.740567	0.180901	0.934807	0.789938	0.144869	-0.0360319	0.0493703	212	67	1524	59	835	60	14658	0	-7.897	-21.386	11	0	0	1	0	0	0	2.52	44.664	6.51	5.13	2.56	5.33	3.35	7.1	3.55	6.71	1.18	3.35	11.83	6.51	2.17	2.17	8.88	8.48	4.54	0.59	3.16	6.9
ENSMUSG00000004936	ENSMUST00000005066	Map2k1	0.820657	0.121851	0.698807	0.680456	0.338124	0.342331	-0.356475	0.216274	339	70	1182	53	915	39	67862	0.793	-2.889	-10.081	11	0	0	1	0	0	0	0	40.5612	6.11	4.58	3.31	5.09	1.53	7.63	4.07	7.63	2.54	6.62	9.92	7.12	3.05	3.56	7.38	7.89	3.05	0.51	2.29	6.11
ENSMUSG00000004937	ENSMUST00000005067	Sgta	0.776057	0.156963	0.619093	0.808729	0.324303	0.484425	-0.134668	0.16734	87	63	948	59	934	57	16104	0	-7.926	3.107	12	0	0	0	0	0	0	0	52.8662	11.11	4.13	4.76	4.44	1.27	8.25	8.25	6.98	2.22	4.13	10.16	4.13	2.86	2.54	6.03	8.57	3.49	0	3.17	3.49
ENSMUSG00000004939	ENSMUST00000005069	Nmrk2	-0.308464	-0.832901	0.524438	0.735771	0.569146	0.166625	-0.357813	1.40205	75	68	588	54	1191	45	3882	0	-5.683	-9.067	7	0	1	0	0	0	0	0	39.6907	3.08	5.64	2.56	7.18	1.54	5.64	5.64	7.69	3.08	3.08	11.79	5.13	3.59	4.1	5.13	5.64	5.13	1.54	4.62	8.21
ENSMUSG00000004945	ENSMUST00000188282	Tmem242	0.62749	0.246953	0.380537	0.699668	-0.0197768	0.719445	0.338907	-0.26673	42	42	357	52	423	47	7965	0.068	-7.383	-5.443	4	0	0	1	0	0	0	0	28.2051	13.56	3.39	0.85	2.54	1.69	6.78	0	13.56	0.85	1.69	11.86	5.08	2.54	5.08	5.08	11.02	5.08	3.39	0.85	5.08
ENSMUSG00000004947	ENSMUST00000005072	Dtx2	0.918012	0.563352	0.354659	0.919399	0.771181	0.148217	-0.206442	0.207829	328	54	1857	59	377	59	37988	0	-8.625	-0.661	11	0	0	0	0	0	0	0	42.9498	7.77	5.18	2.75	2.91	2.75	3.72	5.83	8.25	3.4	3.4	7.77	3.56	2.43	2.59	9.22	10.03	6.31	1.78	3.24	7.12
ENSMUSG00000004951	ENSMUST00000005077	Hspb1	1	-0.820135	1.82013	1	0.913829	0.0861709	-1.73396	1.73396	140	55	630	63	133	47	1645	0	-10.14	10.499	3	0	0	1	0	0	0	0	47.5962	10.53	7.66	0.96	3.35	0.48	8.61	3.83	6.7	1.91	2.87	7.18	3.35	0.48	4.31	9.57	9.09	7.18	2.87	1.91	7.18
ENSMUSG00000004952	ENSMUST00000042135	Rasa4	0.389349	0.199418	0.189931	0.826711	0.412678	0.414033	0.224103	0.21326	197	71	2409	58	308	52	27945	0	-9.501	3.832	21	0	0	0	0	0	0	2.12	43.4457	7.73	7.23	2.62	5.11	2.37	7.23	5.11	5.49	2.87	3.49	12.22	5.74	1	3.87	4.74	7.61	5.11	1.37	1.75	7.36
ENSMUSG00000004961	ENSMUST00000065957	Syt5	1	-0.46376	1.46376						256	50	1161	57	333	49	6803	0	-9.771	-7.617	8	1	0	0	0	0	0	14.16	41.039	6.99	7.51	2.33	5.18	1.3	4.92	5.96	7.77	2.07	3.11	10.36	6.99	1.81	3.11	7.51	5.7	3.37	1.04	3.37	9.59
ENSMUSG00000004980	ENSMUST00000090002	Hnrnpa2b1	0.792879	0.516504	0.276374	0.521419	0.358416	0.163002	-0.113372	-0.158088	169	66	1026	45	467	33	8722	4.359	-0.468	-9.212	12	0	0	3	0	0	0	0	23.8235	3.23	7.04	5.28	4.99	0.29	5.87	2.93	25.22	2.05	2.64	2.35	4.69	2.05	5.57	4.11	7.62	2.93	0.29	6.45	4.4
ENSMUSG00000004994	ENSMUST00000098578	Ccdc130	0.983917	0.847412	0.136505	0.950344	0.833685	0.116659	-0.0198463	-0.0137268	275	53	1158	54	686	49	12586	0	-0.569	4.701	10	0	0	1	0	0	0	1.96	46.3542	7.27	8.05	4.68	5.71	2.08	9.35	4.42	4.68	2.86	3.12	7.79	7.79	2.6	2.08	5.71	9.61	4.68	1.04	3.12	3.38
ENSMUSG00000004996	ENSMUST00000126435	Mri1	0.764436	0.210272	0.554164	0.845032	0.373682	0.47135	-0.0828137	0.16341	64	67	1110	60	1645	43	7419	0.855	-10.852	-7.183	5	0	0	2	0	0	0	0	42.663	14.09	7.05	2.44	3.79	1.36	7.86	4.07	8.67	2.98	4.88	10.57	1.9	1.9	2.17	4.07	4.88	6.5	0.54	1.9	8.4
ENSMUSG00000005034	ENSMUST00000106137	Prkacb	0.56728	0.279231	0.288049	0.443093	0.229048	0.214045	-0.074004	-0.0501837	321	44	1017	47	2723	42	40397	1.879	1.486	-0.081	10	0	2	6	0	0	0	0	34.1246	5.62	5.33	3.55	5.33	0.89	7.99	3.25	5.92	2.37	5.92	9.47	9.17	2.07	7.1	4.44	4.73	4.44	1.78	4.73	5.92
ENSMUSG00000005043	ENSMUST00000005173	Sgsh	0.796369	0.179021	0.617348	0.821818	0.42845	0.393369	-0.22398	0.249429	52	74	1509	58	2796	54	12055	0.326	-5.384	-9.791	8	0	0	1	0	0	0	0	42.515	5.58	5.18	3.59	5.98	1.79	3.98	5.58	6.77	3.98	4.18	10.76	2.39	1.99	4.98	7.57	6.77	6.57	1.99	4.18	6.18
ENSMUSG00000005045	ENSMUST00000030775	Chd5	-0.201511	1	-1.20151	0.331428	-0.404243	0.73567	1.93718	-1.40424	301	81	5859	56	3326	54	51544	0	-5.362	-35.878	42	0	1	3	0	0	0	0	49.4618	5.43	5.64	3.94	6.86	1.33	10.04	4.1	7.22	2.36	4	9.02	9.27	2.61	3.43	6.1	6.05	3.53	1.49	3.02	4.56
ENSMUSG00000005054	ENSMUST00000005185	Cstb	0.828572	0.596567	0.232005	0.683195	0.386875	0.296321	0.0643152	-0.209692	123	60	297	49	183	39	1954	0	-3.435	0.064	3	0	0	0	0	0	0	0	38.1443	7.14	3.06	4.08	5.1	2.04	7.14	7.14	4.08	3.06	3.06	7.14	9.18	3.06	6.12	5.1	7.14	6.12	0	2.04	8.16
ENSMUSG00000005057	ENSMUST00000005188	Sh2b2				-12.7757	-6.60568	-6.17007			301	75	1866	62	681	54	26755	0	-11.116	-18.922	9	0	0	0	0	0	0	2.87	43.0645	12.4	7.09	2.42	4.99	2.09	6.76	2.74	7.25	3.38	1.61	8.21	2.58	1.29	3.86	7.89	9.66	6.76	1.29	1.29	6.44
ENSMUSG00000005057	ENSMUST00000005188	Sh2b2				-12.7757	-6.60568	-6.17007			301	75	1866	62	681	54	26755	0	-11.116	-18.922	9	0	0	0	0	0	0	2.87	43.0645	12.4	7.09	2.42	4.99	2.09	6.76	2.74	7.25	3.38	1.61	8.21	2.58	1.29	3.86	7.89	9.66	6.76	1.29	1.29	6.44
ENSMUSG00000005057	ENSMUST00000196397	Sh2b2				-12.7757	-6.60568	-6.17007			248	75	1866	62	683	53	26708	0	-11.116	-22.98	9	0	0	0	0	0	0	0	43.0645	12.4	7.09	2.42	4.99	2.09	6.76	2.74	7.25	3.38	1.61	8.21	2.58	1.29	3.86	7.89	9.66	6.76	1.29	1.29	6.44
ENSMUSG00000005057	ENSMUST00000196397	Sh2b2				-12.7757	-6.60568	-6.17007			248	75	1866	62	683	53	26708	0	-11.116	-22.98	9	0	0	0	0	0	0	0	43.0645	12.4	7.09	2.42	4.99	2.09	6.76	2.74	7.25	3.38	1.61	8.21	2.58	1.29	3.86	7.89	9.66	6.76	1.29	1.29	6.44
ENSMUSG00000005069	ENSMUST00000112532	Pex5	0.642719	0.0174416	0.625277	0.708575	0.219801	0.488774	-0.136503	0.20236	75	75	1920	56	1153	50	18252	0	-7.889	-19.646	16	0	0	2	0	0	0	0	39.3417	12.36	5.16	3.29	6.73	0.94	10.17	6.26	6.73	1.56	2.03	11.58	3.13	2.03	3.6	4.69	6.89	3.6	2.19	2.5	4.54
ENSMUSG00000005078	ENSMUST00000117449	Jkamp	0.939206	0.774952	0.164253	0.752785	0.490242	0.262543	0.0982899	-0.284711	323	63	918	48	633	33	15605	0	1.903	-9.067	7	0	3	4	0	0	0	0	22.6974	6.89	3.61	1.64	2.62	3.93	3.93	1.64	5.57	2.62	5.57	16.07	3.93	2.95	5.25	4.92	6.89	5.25	1.64	7.54	7.54
ENSMUSG00000005087	ENSMUST00000005218	Cd44	0.657784	0.566714	0.09107	0.361412	0.336791	0.0246207	-0.0664492	-0.229922	279	56	2343	48	2992	39	90485	2.213	3.074	-0.951	19	0	0	6	0	0	0	0	31.1938	6.03	3.59	5.64	6.28	1.28	7.05	5.13	5.64	3.85	4.1	5.38	3.46	1.54	2.82	6.79	10.64	12.56	2.05	1.79	4.36
ENSMUSG00000005089	ENSMUST00000080210	Slc1a2	1	-1.19564	2.19564						626	70	1719	50	9250	41	132126	0	-4.761	-26.458	11	0	2	16	0	0	0	2.57	32.049	8.22	3.15	4.2	4.55	1.57	4.9	2.62	7.87	1.75	9.09	11.71	5.59	4.9	3.67	3.67	6.12	5.59	0.7	1.57	8.57
ENSMUSG00000005102	ENSMUST00000005233	Eif2ak4	0.712163	0.397447	0.314717	0.68718	0.288538	0.398642	0.0839254	-0.108909	91	73	4947	50	174	30	86617	0	-1.278	-30.371	39	0	5	1	0	0	0	0	34.3048	5.89	5.7	2.91	5.89	1.7	8.07	5.64	5.22	3.16	5.52	10.38	6.25	1.52	3.7	4.85	8.19	4.67	0.67	3.16	6.92
ENSMUSG00000005103	ENSMUST00000201260	Wdr1	0.787953	0.433046	0.354906	0.7217	0.367009	0.354692	-0.000214508	-0.0660377	918	52	1002	52	219	51	34049	2.088	-4.094	4.412	15	2	0	0	0	0	0	0	32.5301	4.8	2.1	4.5	7.51	2.4	3.9	3.3	9.01	4.8	3.9	7.81	6.01	1.8	1.8	3	9.61	6.01	1.8	4.5	11.41
ENSMUSG00000005107	ENSMUST00000067886	Slc2a9	-0.173547	0.0181186	-0.191666	-0.0156834	-0.116342	0.100658	0.292324	-0.13446	175	59	1617	54	1810	47	131034	0	-4.761	-18.197	12	0	0	2	0	0	0	0	33.7058	9.11	4.09	2.79	2.42	1.49	4.65	3.9	8.92	0.74	7.43	12.45	3.53	2.42	6.69	5.02	7.62	5.95	1.49	2.97	6.32
ENSMUSG00000005124	ENSMUST00000005255	Ccn4	0.772257	0.632797	0.13946	-0.0435144	-1.76445	1.72093	1.58147	-2.39724	246	58	1104	57	3747	41	31882	0	-8.087	-16.603	5	0	0	4	0	0	0	6.67	37.4317	7.08	7.63	4.36	4.9	10.35	4.9	4.09	5.99	0.82	4.36	7.08	2.18	0.54	2.72	8.72	5.18	7.63	2.18	3.27	5.99
ENSMUSG00000005125	ENSMUST00000005256	Ndrg1	0.718532	0.489097	0.229434	0.66449	0.452345	0.212146	-0.0172887	-0.0367524	155	56	1185	56	1549	47	40323	0	-4.651	-9.212	16	0	0	2	0	0	0	0	40.9669	6.35	4.31	5.08	4.57	2.03	6.35	3.81	8.12	4.31	3.55	8.88	3.3	4.82	2.54	6.09	9.14	6.6	0.76	2.28	7.11
ENSMUSG00000005142	ENSMUST00000034121	Man2b1	0.435122	0.122842	0.31228	0.495889	0.207878	0.288011	-0.024269	0.0850365	15	80	3042	53	765	52	14968	0	-3.862	3.977	24	0	1	0	0	0	0	0	35.7708	6.22	5.82	5.03	5.03	0.99	4.44	5.23	6.32	2.86	2.47	11.15	4.05	2.47	4.24	6.02	7.9	5.82	2.47	3.85	7.6
ENSMUSG00000005148	ENSMUST00000005279	Klf5									304	74	1341	56	1707	35	16346	0	2.004	-2.69	4	0	1	4	0	0	0	0	41.573	7.17	5.16	3.81	4.04	2.02	4.04	6.28	3.14	4.71	3.14	8.3	4.26	2.91	3.59	13.9	8.07	7.85	0.45	2.91	4.26
ENSMUSG00000005150	ENSMUST00000093357	Wdr83	0.805394	0.520926	0.284468	0.745057	0.515933	0.229123	-0.0553445	-0.0049928	131	43	948	57	159	48	5712	0.67	-9.17	0.643	9	1	1	1	0	0	0	2.36	38.2166	5.71	6.35	2.54	7.3	4.13	5.71	3.49	9.84	2.22	2.22	9.84	4.44	1.27	2.54	3.81	8.89	6.03	1.59	3.17	8.89
ENSMUSG00000005161	ENSMUST00000109734	Prdx2	0.57192	0.000249175	0.57167	0.33882	0.115253	0.223568	-0.348103	0.115003	266	56	597	53	749	44	5248	0.621	-4.655	-0.081	6	0	0	0	0	0	0	3.08	37.0558	7.58	3.54	4.04	8.08	1.52	5.05	3.03	8.59	2.02	5.56	8.59	6.57	0.51	6.06	5.05	6.06	5.05	1.01	3.54	8.59
ENSMUSG00000005198	ENSMUST00000058470	Polr2a	0.696492	0.231048	0.465444	0.79521	0.496823	0.298388	-0.167056	0.265775	414	59	5913	52	413	47	24641	4.707	1.134	-25.733	29	1	0	1	0	0	0	0	33.3672	4.77	4.97	4.11	4.67	1.22	5.79	3.1	6.5	2.13	4.97	7.06	5.33	2.84	2.89	10.05	11.47	7.51	0.71	4.31	5.58
ENSMUSG00000005202	ENSMUST00000005334	Shbg									43	48	1212	54	164	43	3102	0	-6.307	-1.53	8	0	1	0	0	0	0	0	31.8408	5.21	5.71	2.23	6.7	1.24	3.47	5.96	7.44	3.72	3.47	16.38	2.73	2.23	3.23	7.69	9.68	4.22	3.23	0.5	4.96
ENSMUSG00000005204	ENSMUST00000066760	Senp3	0.818039	0.517944	0.300096	0.859004	0.619047	0.239956	-0.0601396	0.101104	107	69	1707	54	405	43	8964	1.241	-5.595	-1.82	11	0	0	1	0	0	0	0	36.6843	4.58	8.63	2.82	5.28	1.94	6.51	4.93	7.92	2.82	2.82	10.04	4.93	2.46	3.87	8.45	7.92	4.93	1.94	2.46	4.75
ENSMUSG00000005220	ENSMUST00000005352	Corin									60	66	3342	52	1460	35	204183	0	-4.681	-12.69	22	0	1	2	0	0	0	0	32.6439	3.68	4.94	3.86	6.38	8.36	6.2	4.13	8.18	2.7	3.05	9.25	3.95	1.44	3.23	5.93	9.79	4.49	1.98	2.52	5.93
ENSMUSG00000005225	ENSMUST00000119706	Plekha8	0.732299	0.65047	0.0818285	0.690119	0.6783	0.0118185	-0.0700101	0.0278304	321	78	1560	47	4858	43	50729	0	0.701	-26.023	14	0	0	11	0	0	0	5.94	29.3436	6.74	2.7	4.24	5.59	2.12	9.83	3.85	5.59	1.93	4.62	10.79	7.13	2.5	3.08	3.66	7.9	6.36	1.54	2.89	6.94
ENSMUSG00000005233	ENSMUST00000005365	Spc25	0.672269	0.795432	-0.123163	0.888571	0.509593	0.378979	0.502141	-0.28584	145	60	681	38	526	40	12300	0	6.606	-3.559	7	0	1	1	0	0	0	0	27.5556	6.64	4.87	7.08	4.42	0.88	13.27	4.42	3.1	1.77	5.75	10.18	12.39	3.54	4.87	1.77	6.64	2.65	0	3.1	2.65
ENSMUSG00000005237	ENSMUST00000108659	Dnah2									131	59	13389	52	184	47	128300	0		-1.241	86	0	3	0	0	0	0	0	39.184	6.01	5.67	4.44	5.27	1.19	7.62	4.8	4.84	2.04	6.12	11.54	6.07	3.12	4.21	4.35	6.05	5.4	1.84	3.14	6.3
ENSMUSG00000005251	ENSMUST00000019386	Ripk4	0.872521	0.799973	0.0725484	-0.199697	-0.369064	0.169367	0.0968182	-1.16904	78	68	2361	56	1152	44	21855	0	-7.699	-14.719	8	0	0	0	0	3	0	0	40	8.65	5.85	2.54	5.09	1.78	7.38	3.94	7.12	4.45	3.69	13.36	5.6	2.16	2.29	4.58	8.52	4.45	1.4	1.27	5.85
ENSMUSG00000005262	ENSMUST00000115578	Ufd1	0.660098	0.330864	0.329234	0.756844	0.203885	0.552959	0.223725	-0.126979	208	53	924	47	946	43	23425	0.663	1.581	5.426	13	0	1	6	0	0	0	1.53	30.0654	4.89	5.54	5.54	5.54	1.63	7.82	3.26	8.14	1.63	5.86	7.49	7.17	3.26	5.86	6.84	6.84	3.26	0.33	2.93	6.19
ENSMUSG00000005267	ENSMUST00000149228	Zfp287	0.563728	0.480498	0.0832304	0.798145	0.662965	0.13518	0.0519495	0.182468	7	42	2280	48	1104	40	17423	0.551	2.616	17.745	6	0	1	2	0	0	0	0	33.905	4.61	4.61	3.69	3.82	4.87	7.77	6.85	5.4	6.06	3.82	7.25	7.91	0.92	3.03	5.53	7.51	6.85	1.19	3.43	4.87
ENSMUSG00000005267	ENSMUST00000149228	Zfp287	0.563728	0.480498	0.0832304	0.798145	0.662965	0.13518	0.0519495	0.182468	7	42	2280	48	1104	40	17423	0.551	2.616	17.745	6	0	1	2	0	0	0	0	33.905	4.61	4.61	3.69	3.82	4.87	7.77	6.85	5.4	6.06	3.82	7.25	7.91	0.92	3.03	5.53	7.51	6.85	1.19	3.43	4.87
ENSMUSG00000005267	ENSMUST00000150336	Zfp287	0.563728	0.480498	0.0832304	0.798145	0.662965	0.13518	0.0519495	0.182468	438	58	894	50	273	40	31530	0.551	0.214	-4.284	8	0	0	0	0	0	0	0	29.7297	4.38	4.38	4.04	5.05	1.68	8.42	6.73	2.69	1.68	3.03	13.13	4.38	1.68	2.36	9.09	7.41	6.73	2.36	2.02	8.75
ENSMUSG00000005267	ENSMUST00000150336	Zfp287	0.563728	0.480498	0.0832304	0.798145	0.662965	0.13518	0.0519495	0.182468	438	58	894	50	273	40	31530	0.551	0.214	-4.284	8	0	0	0	0	0	0	0	29.7297	4.38	4.38	4.04	5.05	1.68	8.42	6.73	2.69	1.68	3.03	13.13	4.38	1.68	2.36	9.09	7.41	6.73	2.36	2.02	8.75
ENSMUSG00000005268	ENSMUST00000124470	Prlr	0.361141	0.422938	-0.0617973	0.561624	0.358494	0.20313	0.264927	-0.0644443	331	53	1827	45	7742	36	159355	0	3.29	1.658	10	0	1	14	0	0	0	6.82	27.3476	4.11	1.97	4.28	6.09	2.3	8.22	3.62	5.26	2.8	4.11	8.72	7.4	1.48	2.96	9.21	8.72	7.24	2.14	3.78	5.59
ENSMUSG00000005299	ENSMUST00000005431	Letm1	0.71367	-0.0187361	0.732406	0.754336	0.401557	0.352779	-0.379627	0.420293	265	73	2217	55	2790	49	43145	3.468	-5.093	-16.748	14	0	0	0	0	0	0	7.65	42.3338	7.05	5.96	2.03	4.88	1.63	10.7	5.01	4.47	1.49	5.28	12.87	8.81	1.49	2.44	5.15	6.64	6.1	0.81	1.08	6.1
ENSMUSG00000005312	ENSMUST00000058735	Ubqln1	0.779442	0.378682	0.40076	0.539384	0.353572	0.185812	-0.214948	-0.0251095	217	78	1749	52	1720	38	39498	1.685	-1.004	-21.386	11	0	0	7	0	0	0	0	36.3167	8.76	3.26	6.87	2.92	0	4.98	11.34	8.25	1.03	3.61	9.79	1.89	5.67	2.75	8.42	10.65	6.53	0.17	0.52	2.58
ENSMUSG00000005338	ENSMUST00000111220	Cadm3									201	71	1191	53	3763	51	34438	0	-1.596	-19.212	9	1	0	1	0	0	7	0	35.1899	7.07	3.54	3.54	5.3	1.77	5.56	5.05	7.83	2.53	5.56	9.34	4.8	1.26	2.78	6.06	10.35	7.58	1.26	3.03	5.81
ENSMUSG00000005354	ENSMUST00000100486	Txn2	0.277554	0.327268	-0.0497135	0.231873	0.339722	-0.107849	-0.0581352	0.0124539	91	66	360	54	225	45	2600	0	-6.077	-22.835	3	0	0	0	0	0	0	0	35.5932	5.04	10.08	3.36	5.04	1.68	1.68	9.24	4.2	1.68	0.84	9.24	3.36	1.68	3.36	10.08	5.88	10.92	0.84	0.84	10.92
ENSMUSG00000005360	ENSMUST00000005493	Slc1a3									523	49	1632	52	2008	40	76641	0	-2.741	16.151	10	0	0	2	0	0	0	6.21	33.7638	7.73	4.42	4.42	3.13	0.55	5.89	2.95	7.73	0.74	8.84	10.87	5.16	4.97	4.42	3.68	4.97	6.81	0.55	2.39	9.76
ENSMUSG00000005362	ENSMUST00000113239	Crbn	0.913168	0.534764	0.378404	0.771684	0.310201	0.461483	0.0830796	-0.224563	17	46	1338	43	729	35	19874	0.729	3.965	11.513	11	0	2	2	0	0	0	0	23.4234	6.07	4.27	3.37	6.29	3.37	7.87	6.29	3.82	2.47	6.52	9.89	6.07	2.47	2.92	5.62	6.74	5.62	2.25	2.92	5.17
ENSMUSG00000005364	ENSMUST00000204659	Il5ra	0.707553	0.72591	-0.0183576	0.0945548	0.437368	-0.342813	-0.324456	-0.288542	302	42	1248	43	2025	41	38681	0	3.597	4.557	13	0	4	1	0	0	0	8.54	23.1884	6.02	4.1	4.58	3.61	2.65	6.27	3.61	3.61	3.61	5.3	9.88	6.27	0.72	4.34	6.99	7.47	6.99	2.17	3.13	8.67
ENSMUSG00000005370	ENSMUST00000005503	Msh6	0.949237	0.748473	0.200764	0.935015	0.733344	0.20167	0.000906704	-0.0151288	87	70	4077	48	87	27	15831	1.746	-1.375	-0.806	10	0	3	0	0	0	0	1.62	31.4665	7	5.89	2.8	5.45	2.36	8.39	3.09	7.36	2.14	3.46	9.43	7.14	1.84	4.34	4.57	9.2	6.04	1.18	2.65	5.67
ENSMUSG00000005371	ENSMUST00000130379	Fbxo11	0.598146	0.666542	-0.0683966	0.440183	0.562534	-0.122351	-0.0539548	-0.104008	37	56	2529	40	1187	33	74170	2.329	5.851	-1.675	23	0	4	1	0	0	0	0	21.2842	5.94	5.34	7.84	5.11	3.09	5.94	3.33	9.86	4.75	8.31	4.75	4.28	1.78	4.04	3.92	5.46	5.46	0.95	4.28	5.58
ENSMUSG00000005373	ENSMUST00000005507	Mlxipl									5	80	2595	58	1022	47	31465	0	-3.981	8.904	17	0	0	0	0	0	0	0	40.9038	6.48	6.6	2.66	4.4	1.27	5.21	4.75	5.32	2.08	3.13	10.76	3.24	2.08	3.94	13.31	10.65	6.48	1.16	1.62	4.86
ENSMUSG00000005374	ENSMUST00000005508	Tbl2	0.720295	0.269922	0.450373	0.857056	0.488631	0.368425	-0.0819479	0.218709	52	68	462	59	854	55	10136	0.568	-8.863	-19.936	6	0	0	0	0	0	0	0	51.9737	8.5	7.19	3.27	4.58	2.61	6.54	6.54	4.58	4.58	1.31	11.11	7.84	3.27	2.61	5.23	8.5	3.92	1.31	0.65	5.88
ENSMUSG00000005378	ENSMUST00000085984	Bud23	0.769006	0.348302	0.420704	0.604186	0.268439	0.335747	-0.0849571	-0.0798628	257	62	846	58	413	46	11710	0.283	-8.944	-8.777	13	0	0	0	0	0	0	3.37	45	7.12	9.25	2.14	6.05	2.14	6.76	4.27	7.83	1.07	3.2	9.61	6.05	2.14	3.91	5.69	9.25	4.27	1.07	3.56	4.63
ENSMUSG00000005397	ENSMUST00000005532	Nid1									151	63	3738	55	2202	40	74719	0	-3.961	-14.139	20	0	1	1	0	0	0	0	37.7814	6.02	5.38	3.69	5.94	4.02	5.7	4.58	9.4	3.21	4.5	6.83	2.33	1.29	4.02	7.15	7.39	6.91	1.2	3.78	6.67
ENSMUSG00000005410	ENSMUST00000164309	Mcm5	0.735888	0.247767	0.488121	0.789956	0.327769	0.462187	-0.0259341	0.0800018	61	61	2205	54	1115	44	18871	1.367	-6.091	-10.226	17	0	1	4	0	0	0	0	39.5634	7.63	8.17	2.04	6.4	1.91	7.08	4.5	7.08	2.18	6.81	8.72	6.27	3.95	3.81	4.09	7.49	3.95	0.27	2.32	5.31
ENSMUSG00000005413	ENSMUST00000005548	Hmox1	0.899874	-0.450394	1.35027	0.669252	0.452874	0.216378	-1.13389	0.903268	129	61	870	56	570	45	6969	0.797	-4.783	-1.53	5	0	1	1	0	0	0	0	43.4028	9.34	4.84	2.42	2.42	0.35	9.69	6.92	3.81	3.46	3.46	10.73	5.54	3.81	4.15	6.92	5.88	6.57	1.04	3.46	5.19
ENSMUSG00000005417	ENSMUST00000116371	Mprip	0.243562	0.07095	0.172612	0.388935	0.26746	0.121475	-0.0511371	0.19651	319	82	3075	54	5372	47	118348	1.035	-3.378	-25.878	24	0	1	6	0	0	0	0	42.7175	7.13	8.3	2.83	5.47	1.46	11.13	6.35	4.79	1.86	3.81	9.67	6.84	1.86	2.05	5.37	8.98	5.96	1.07	1.95	3.13
ENSMUSG00000005442	ENSMUST00000169266	Cic	0.171333	0.0477058	0.123627	0.595288	0.57804	0.0172482	-0.106379	0.530334	64	68	7533	62	624	52	26456	3.458	-10.116	-3.994	21	0	0	0	0	0	0	0	40.4544	10.2	5.62	1.08	3.39	1	5.98	3.71	10	1.35	1.59	6.53	4.02	1.08	2.47	15.98	11.55	6.77	0.6	1.04	6.06
ENSMUSG00000005447	ENSMUST00000005583	Pafah1b3	0.603954	-0.233393	0.837347	0.792492	0.0404929	0.751999	-0.0853482	0.273886	162	57	699	56	40	39	2938	0	-8.188	-14.864	6	0	0	0	0	0	0	5.04	40.6926	6.03	6.03	3.88	5.17	0.86	5.6	6.03	8.62	6.47	3.88	12.07	3.02	1.72	2.59	6.47	5.6	3.45	1.72	1.72	9.05
ENSMUSG00000005465	ENSMUST00000005601	Il27ra	0.639268	0.30639	0.332878	0.611758	0.397205	0.214553	-0.118325	0.0908147	55	65	1872	56	737	46	12296	1.241	-8.888	-18.197	14	0	1	0	0	0	0	0	33.9228	4.98	4.33	2.57	3.21	2.73	5.94	5.3	7.38	1.61	2.41	11.56	3.85	1.12	1.93	10.91	7.7	6.74	4.65	2.25	8.83
ENSMUSG00000005469	ENSMUST00000211558	Prkaca	0.726812	0.392537	0.334275	0.643675	0.469136	0.174539	-0.159736	0.0765986	190	56	1032	51	177	48	18712	1.452	-1.506	4.122	10	0	0	1	0	0	0	0	42.6901	5.83	4.37	4.66	5.83	0.58	7	4.08	5.83	2.33	6.12	9.33	9.62	2.04	7.29	3.79	5.25	4.37	1.75	4.08	5.83
ENSMUSG00000005470	ENSMUST00000005607	Asf1b	0.797815	0.551323	0.246492	0.770851	-0.00552113	0.776372	0.52988	-0.556844	322	62	609	53	857	45	14691	0	-2.033	-15.299	4	0	1	0	0	0	0	2.42	34.8259	4.95	3.47	6.93	6.44	2.48	7.92	2.97	3.96	1.98	5.94	8.91	1.98	1.49	5.45	10.4	9.41	2.97	0.99	2.48	8.91
ENSMUSG00000005474	ENSMUST00000005611	Myl10	0.699622	0.762723	-0.0631008						205	55	444	50	39	53	7815	0	-1.584	6.006	6	0	0	0	0	0	0	1.91	44.5205	6.8	3.4	4.08	8.84	1.36	11.56	4.08	6.12	1.36	5.44	6.12	8.84	4.08	10.2	3.4	1.36	6.12	0	1.36	5.44
ENSMUSG00000005481	ENSMUST00000019576	Ddx39	0.878706	0.182762	0.695945	0.74391	0.155279	0.588631	-0.107314	-0.0274821	165	61	1284	51	207	46	8172	0.808	-3.438	-1.096	11	0	0	0	0	0	0	0	37.0892	5.15	6.32	3.28	7.03	2.11	8.43	6.09	4.22	2.34	4.68	9.6	6.32	3.51	5.62	4.22	5.62	3.28	0	2.34	9.84
ENSMUSG00000005483	ENSMUST00000005620	Dnajb1	0.966894	0.915833	0.051061	0.939391	0.9093	0.0300909	-0.02097	-0.00653382	139	72	1023	53	1834	49	4461	0.817	-2.567	-29.357	3	0	0	0	0	0	0	0	42.7729	3.82	7.94	3.53	7.06	0.88	7.65	2.06	10.29	1.76	6.47	5.29	7.94	2.35	5.88	7.65	6.18	5.29	0.29	2.65	5
ENSMUSG00000005493	ENSMUST00000005630	Msh4	0.808782	1	-0.191218	1	1	0	0.191218	0	154	51	2877	46	294	29	48990	0	1.138	-0.371	20	0	6	0	0	0	0	2.6	28.4222	8.25	5.85	4.18	4.07	2.09	5.95	4.18	4.18	2.19	6.37	10.65	5.01	2.51	3.44	3.65	10.86	7.1	0.42	4.18	4.91
ENSMUSG00000005501	ENSMUST00000040783	Usp40	0.480995	0.381458	0.0995372	0.46136	0.523906	-0.0625466	-0.162084	0.142448	133	60	3441	45	1475	45	63431	0	1.582	-6.603	28	0	2	1	0	0	0	0	26.2882	5.76	5.41	3.84	6.28	2.27	8.29	4.97	5.76	2.79	4.28	12.74	6.2	1.57	3.84	4.62	6.89	4.97	1.83	2.53	5.15
ENSMUSG00000005503	ENSMUST00000031787	Evx1	1	0.26812	0.73188						347	60	1251	66	1279	54	4881	0	-13.662	-11.675	3	1	0	2	0	0	0	8.57	53.253	14.66	6.49	1.68	3.61	2.4	5.77	2.88	9.62	1.92	0.72	8.17	2.4	2.4	3.13	10.82	12.02	4.33	0.48	2.88	3.61
ENSMUSG00000005505	ENSMUST00000090682	Kbtbd4	0.91947	0.815163	0.104307	0.902493	0.797249	0.105244	0.000936847	-0.0179138	196	58	1557	51	684	42	5819	0.508	-3.084	5.716	4	0	2	0	0	0	0	0	33.4623	7.53	4.63	4.05	5.6	3.09	7.14	3.67	5.41	3.67	4.63	10.81	4.25	1.54	4.05	3.28	8.11	5.79	1.54	3.47	7.72
ENSMUSG00000005506	ENSMUST00000111452	Celf1	0.563511	0.636359	-0.0728484	0.572859	0.65619	-0.0833312	-0.0104828	0.0198309	126	45	1542	48	6132	44	31878	1.257	-1.392	-7.038	13	0	1	10	0	0	1	0	32.0312	10.33	2.73	5.85	3.7	1.56	3.31	8.38	7.8	1.56	3.51	10.33	5.26	4.68	3.9	4.68	10.14	5.46	0.39	2.14	4.29
ENSMUSG00000005510	ENSMUST00000005647	Ndufs3	0.915982	0.467852	0.448131	0.854742	0.479841	0.374901	-0.0732299	0.0119894	180	60	792	53	74	39	10192	0.961	-3.859	-20.226	7	0	1	0	0	0	0	0	35.4962	9.13	8.75	2.66	6.46	1.14	7.22	3.42	4.56	2.66	3.8	8.75	4.56	0.76	5.7	6.46	4.94	4.56	1.9	3.42	9.13
ENSMUSG00000005514	ENSMUST00000122113	Por	0.892282	0.277005	0.615277	0.8681	0.533213	0.334886	-0.280391	0.256208	108	66	1950	58	548	55	46169	0.666	-7.303	-2.545	15	0	0	0	0	0	0	0	46.6049	7.86	5.7	3.24	5.39	1.54	8.63	3.24	6.78	2.47	3.7	8.47	5.24	2.31	4.47	5.39	7.09	6.32	1.39	4.16	6.63
ENSMUSG00000005533	ENSMUST00000005671	Igf1r	-0.63513	-0.492605	-0.142525	0.177674	0.308964	-0.131289	0.0112357	0.801569	32	37	4110	54	7267	46	280842	0.856	-3.795	3.687	21	0	2	13	0	0	2	0	38.7427	4.97	5.99	6.36	4.6	3.21	8.18	2.63	6.65	1.75	5.33	8.33	4.89	2.85	3.51	6.06	6.72	5.33	1.61	4.46	6.57
ENSMUSG00000005534	ENSMUST00000091291	Insr	-0.0637179	0.0339379	-0.0976558	0.285224	0.323509	-0.038285	0.0593708	0.289571	489	68	4119	50	4747	39	128696	0	-2.176	-16.458	21	0	2	7	0	0	3	2.72	33.4063	4.15	5.61	5.17	5.32	3.43	7.65	2.84	6.34	2.62	4.81	9.77	4.96	2.33	4.45	6.12	7.65	5.17	1.46	3.64	6.49
ENSMUSG00000005540	ENSMUST00000005678	Fcer2a				0.603656	0.784573	-0.180917			173	47	996	50	1073	52	12439	0	-1.645	8.47	12	0	0	0	0	0	0	0	35.7576	5.74	3.93	6.34	4.53	3.32	6.65	10.27	6.34	1.51	3.32	11.78	6.65	2.72	2.11	3.32	8.46	3.63	3.63	1.81	3.93
ENSMUSG00000005553	ENSMUST00000005692	Atp4a									42	61	3105	55	338	51	13314	0	-6.856	2.383	22	0	0	0	0	0	0	0	38.4318	8.7	4.84	3.19	5.22	2.9	5.8	4.45	7.25	1.26	6.87	9.77	4.74	2.8	4.84	4.55	5.9	5.71	1.06	2.8	7.35
ENSMUSG00000005566	ENSMUST00000005705	Trim28	0.858362	0.327655	0.530706	0.877117	0.508417	0.3687	-0.162006	0.180762	567	72	2505	56	173	49	6884	0	-9.095	-13.994	17	0	0	1	0	0	0	3.31	36.1345	10.67	5.04	2.52	5.4	3.72	7.19	4.92	8.15	2.4	2.16	8.63	5.04	2.04	2.52	7.67	9.11	4.8	0.6	1.32	6.12
ENSMUSG00000005575	ENSMUST00000165394	Ube2m	0.8151	0.49282	0.322281	0.751825	0.464339	0.287486	-0.0347945	-0.0284805	473	61	261	51	494	57	3156	1.28	-5.875	-5.154	7	0	1	1	0	0	0	0	40	2.33	6.98	10.47	3.49	2.33	9.3	4.65	5.81	1.16	6.98	12.79	3.49	2.33	3.49	5.81	3.49	2.33	1.16	5.81	5.81
ENSMUSG00000005580	ENSMUST00000117801	Adcy9	0.169709	-0.175798	0.345507	-0.199697	-0.42126	0.221562	-0.123945	-0.245461	76	67	4062	53	369	51	132280	0	-5.509	-7.907	11	0	0	0	0	0	0	0	38.6834	6.36	4.8	3.4	4.73	2.88	5.99	3.99	6.43	2.73	4.95	10.64	5.62	2.44	5.03	3.84	9.76	5.03	1.26	2.88	7.24
ENSMUSG00000005583	ENSMUST00000199450	Mef2c	0.476812	-0.348645	0.825457	0.709085	0.233514	0.475571	-0.349886	0.582159	406	47	1401	50	1055	33	159481	0.783	0.975	21.803	11	0	1	2	0	0	0	0	34.4086	4.51	5.79	6.44	4.72	1.29	4.08	3.65	7.3	2.79	3.65	9.01	4.08	3	1.5	9.23	14.38	7.08	0.43	2.58	4.51
ENSMUSG00000005609	ENSMUST00000005749	Ctr9	0.949332	0.564144	0.385188	0.91125	0.500917	0.410333	0.0251446	-0.0632271	186	65	3522	48	592	45	27427	2.389	0.308	-17.472	25	0	2	1	0	0	0	0	34.727	8.87	6.31	4.77	6.82	1.28	9.8	5.71	5.71	2.64	3.24	9.46	8.87	1.53	2.98	3.24	7.33	2.9	0.6	3.92	4.01
ENSMUSG00000005611	ENSMUST00000005751	Mrvi1	1	-2.6594	3.6594						538	58	2571	55	3089	46	114192	0	-5.369	-10.661	21	0	1	3	0	0	0	0	39.2982	7.71	5.14	3.62	3.39	1.17	10.98	5.14	6.07	1.87	2.22	9.81	6.54	2.34	1.4	9	11.57	4.32	0.7	1.17	5.84
ENSMUSG00000005615	ENSMUST00000079791	Pcyt1a	0.892765	0.787755	0.105011	0.837435	0.686313	0.151122	0.0461117	-0.101442	118	62	1104	50	3567	45	44147	2.833	-1.218	5.426	9	0	0	3	0	0	0	1.62	36.3388	6.54	7.36	3	6.54	1.91	8.99	3.27	5.18	2.72	4.63	4.63	7.63	2.18	4.63	5.99	9.26	4.36	0.82	3	7.36
ENSMUSG00000005621	ENSMUST00000107353	Zfp592	0.810982	0.328269	0.482713	0.788154	0.518325	0.269829	-0.212884	0.190056	207	65	3789	53	3301	47	51484	0.788	-2.54	9.919	10	0	1	6	0	0	0	3.2	38.1443	7.29	4.6	3.01	4.36	3.72	6.1	5.07	4.83	4.68	3.01	7.13	6.66	1.74	3.09	9.43	12.68	5.15	0.24	1.43	5.78
ENSMUSG00000005625	ENSMUST00000107237	Psmd4	0.637424	0.300474	0.336951	0.803451	0.535612	0.267839	-0.0691117	0.235139	81	59	1131	53	120	53	9921	2.823	-3.468	-4.139	10	0	0	0	0	0	0	0	41.3333	9.57	3.99	5.05	7.45	1.06	9.04	4.52	6.91	1.6	3.99	9.04	6.12	3.72	2.66	4.79	6.91	6.12	0	0.8	6.65
ENSMUSG00000005628	ENSMUST00000005769	Tmod4	0.814888	0.689364	0.125524	0.603656	0.569146	0.0345103	-0.0910137	-0.120219	105	61	1038	49	99	46	4696	0	-0.511	-2.4	10	0	0	0	0	0	0	0	35.7558	6.96	6.38	5.22	6.38	1.74	11.01	6.38	3.48	0.87	5.22	10.14	5.51	3.77	1.45	6.38	5.8	5.22	0.29	2.9	4.93
ENSMUSG00000005640	ENSMUST00000029711	Insrr	-0.0185769	-0.604398	0.585821						473	58	3903	56	726	54	19151	0	-6.739	-15.733	22	0	0	0	0	0	0	4.27	37.2594	6.85	6.62	3.31	4.15	3.38	7	3.92	7.92	2.92	3.77	11.69	3.31	1.69	3.77	6.23	5.85	6.23	1.54	3.15	6.69
ENSMUSG00000005656	ENSMUST00000219781	Snx6	0.780559	-0.0195987	0.800158	0.65255	-0.230977	0.883528	0.0833697	-0.211379	11	63	273	44	152	37	30016	0	0.245	13.542	6	0	1	1	0	0	0	0	25.8427	5.56	4.44	4.44	12.22	0	10	4.44	4.44	3.33	4.44	8.89	4.44	2.22	6.67	2.22	8.89	2.22	1.11	2.22	7.78
ENSMUSG00000005667	ENSMUST00000005810	Mthfd2	0.677098	0.449858	0.22724	0.501096	0.369016	0.13208	-0.0951599	-0.0808422	77	77	1053	51	955	44	11916	0.711	-1.949	-16.748	8	0	0	3	0	0	0	0	33.2378	8.86	4.86	4.86	4.57	0.86	6	3.14	7.43	3.14	6.86	8.57	7.14	2.57	1.14	6.29	5.14	4.86	0.86	1.14	11.71
ENSMUSG00000005672	ENSMUST00000005815	Kit	0.482712	0.234109	0.248603	0.480656	0.435002	0.0456539	-0.202949	0.200893	97	66	2940	49	2177	44	81768	0	-0.007	-11.82	21	0	5	3	0	0	0	0	32.8221	6.54	4.19	5.52	5.52	2.25	5.21	3.06	5.41	2.04	4.6	8.07	6.33	2.45	4.29	5.21	8.17	6.74	1.43	3.88	9.09
ENSMUSG00000005674	ENSMUST00000005817	Tomm40l	0.576281	0.308887	0.267394	0.424328	0.294456	0.129872	-0.137522	-0.0144315	275	53	927	56	3510	50	6504	0	-7.415	-7.328	10	0	0	0	0	0	0	27.28	37.4593	8.12	5.19	3.57	3.9	0.97	4.87	4.22	9.42	5.19	1.62	12.34	2.92	2.6	4.87	4.55	5.52	6.49	1.62	2.92	9.09
ENSMUSG00000005677	ENSMUST00000005820	Nr1i3									210	57	1077	52	127	59	4876	1.189	-4.869	6.875	9	0	0	0	0	0	0	4.38	35.014	8.1	6.7	3.07	2.79	3.63	7.26	6.98	5.03	3.91	4.47	13.13	4.19	4.19	5.87	4.75	4.47	5.03	0	2.51	3.91
ENSMUSG00000005681	ENSMUST00000111321	Apoa2									96	51	309	49	113	55	1326	0	-3.195	1.948	4	0	0	0	0	0	0	0	37.6238	10.78	1.96	1.96	3.92	0.98	6.86	6.86	3.92	0.98	1.96	12.75	8.82	5.88	4.9	3.92	8.82	6.86	0	2.94	4.9
ENSMUSG00000005682	ENSMUST00000005825	Pan2	0.605456	0.0482873	0.557169	0.690162	0.180588	0.509573	-0.0475954	0.132301	254	54	3603	52	588	44	18019	0.601	-2.692	-5.733	26	0	1	0	0	0	0	6.56	34.6122	6.08	4.83	4.08	5.67	2.17	6.92	4.17	6	2.92	4.67	11.75	5.17	2.25	5.08	5.25	7.5	4.92	1.17	3.08	6.33
ENSMUSG00000005683	ENSMUST00000005826	Cs	0.648111	0.494609	0.153502	0.580175	0.362186	0.217989	0.0644865	-0.132423	184	68	1395	52	1347	45	24746	3.232	-4.137	1.513	11	0	0	3	0	0	0	0	33.2613	8.41	4.74	4.31	4.31	1.08	5.17	3.66	7.33	2.8	3.45	12.5	5.82	4.09	2.8	4.96	7.33	4.96	1.94	4.09	6.25
ENSMUSG00000005686	ENSMUST00000005829	Ampd3	0.587751	0.337228	0.250524	0.216421	0.547033	-0.330612	-0.581136	0.209806	298	52	2301	53	1495	44	39802	0	-1.301	-3.414	15	0	1	1	0	0	0	0	40.7843	6.14	5.48	3.66	5.35	1.17	7.31	4.31	3.79	3.79	3.79	11.1	6.79	3.39	4.44	6.66	7.57	4.7	0.78	5.35	4.44
ENSMUSG00000005687	ENSMUST00000005830	Bcas2	0.866364	0.429237	0.437126	0.835997	0.243398	0.592599	0.155473	-0.18584	118	61	678	48	671	37	7498	0.372	-0.973	-22.98	7	0	0	0	0	0	0	0	37.0536	8.89	6.22	7.11	3.11	0.89	11.56	7.56	4	2.67	4.89	8.89	5.33	3.56	1.78	3.11	4.89	3.56	1.78	4.44	5.78
ENSMUSG00000005696	ENSMUST00000005839	Sh2d1a	0.787553	0.519869	0.267683	0.427132	0.0990891	0.328043	0.0603598	-0.42078	161	49	381	50	341	33	19532	0	-4.087	4.701	4	0	0	3	0	0	0	0	26.4	5.56	6.35	1.59	4.76	2.38	4.76	4.76	9.52	1.59	3.97	8.73	5.56	0.79	2.38	6.35	8.73	7.14	0.79	6.35	7.94
ENSMUSG00000005698	ENSMUST00000005841	Ctcf	0.848845	0.46679	0.382055	0.780031	0.547807	0.232224	-0.149831	0.0810166	268	63	2211	48	1303	38	46344	1.171	0.914	-5.154	12	0	1	3	0	0	0	5.92	34.2857	5.71	6.11	3.26	5.16	3.67	11.01	5.71	5.3	4.48	2.99	4.76	8.83	3.13	2.31	7.34	4.76	6.39	0.14	2.45	6.52
ENSMUSG00000005699	ENSMUST00000212430	Pard6a	0.954195	0.6571	0.297095	0.955073	0.731749	0.223324	-0.0737701	0.0746486	92	82	1038	58	131	47	1845	0	-8.86	-25.878	3	0	0	0	0	0	0	0	39.2442	5.51	9.28	3.48	7.25	1.16	3.48	3.77	9.57	2.32	3.19	13.04	2.32	1.45	2.9	8.41	10.14	3.48	0.58	0.58	8.12
ENSMUSG00000005705	ENSMUST00000194091	Agrp	0.0715139	0.0956971	-0.0241832	1	0.569146	0.430854	0.455038	0.473449	280	58	396	57	58	45	70696	1.985	-11.457	-0.226	6	0	0	0	0	0	0	6.65	32.3077	9.16	8.4	3.05	3.05	8.4	5.34	4.58	5.34	0.76	0.76	16.03	3.82	2.29	3.82	7.63	4.58	6.11	0	1.53	5.34
ENSMUSG00000005718	ENSMUST00000005862	Tfap4	0.985836	0.583908	0.401928	0.899853	0.702693	0.19716	-0.204768	0.118785	338	62	1017	58	892	46	15194	2.228	-4.727	-15.443	7	0	0	1	0	0	5	0	51.632	5.62	8.28	2.37	5.03	0.59	10.95	10.36	3.25	3.25	5.92	8.88	5.03	2.66	1.48	6.21	8.28	5.33	0.3	0.89	5.33
ENSMUSG00000005732	ENSMUST00000115645	Ranbp1	0.897691	0.450718	0.446973	0.522602	0.371344	0.151258	-0.295714	-0.0793745	170	75	612	48	303	29	8949	1.394	3.338	-9.646	6	0	0	1	3	0	0	0	41.5842	9.36	5.91	4.93	6.4	1.48	17.24	1.97	2.96	2.96	3.45	7.88	11.82	2.46	3.94	4.43	3.94	4.43	1.48	0.49	2.46
ENSMUSG00000005763	ENSMUST00000027849	Cd247	0.579523	0.146207	0.433316	0.637725	0.29136	0.346365	-0.0869512	0.145154	106	56	621	54	590	43	78714	7.263	-1.534	-8.632	8	0	0	0	0	0	0	0	39.5122	7.28	9.22	3.4	3.88	1.46	7.28	6.8	8.25	1.46	3.4	10.68	5.83	1.46	3.4	4.85	8.74	3.4	1.46	3.88	3.88
ENSMUSG00000005774	ENSMUST00000137088	Rfx5	0.753663	0.634278	0.119385	0.757141	0.692862	0.0642788	-0.0551063	0.0585842	163	55	1977	54	2193	43	7454	0	-6.462	-12.98	10	0	0	3	0	0	0	1.5	32.7245	8.51	7.45	2.13	3.34	1.22	7.6	3.8	11.85	1.22	3.8	9.27	7.14	1.06	0.91	11.25	7.75	3.95	0.61	1.67	5.47
ENSMUSG00000005779	ENSMUST00000005923	Psmb4	0.872509	0.428243	0.444267	0.856306	0.575623	0.280683	-0.163583	0.14738	53	52	795	55	335	42	2869	0	-7.926	-23.125	7	0	0	2	0	0	0	0	33.4601	9.47	6.82	2.65	4.55	0.76	6.06	3.79	10.23	1.52	4.55	8.33	1.89	4.92	3.03	5.3	7.58	4.92	1.89	5.3	6.44
ENSMUSG00000005800	ENSMUST00000018765	Mmp8									80	55	1398	45	947	38	10030	0	4.237	0.643	10	0	4	0	0	0	0	2.45	24.569	6.88	5.59	5.81	6.02	1.08	3.87	4.52	6.24	3.01	4.52	8.6	3.66	1.94	8.17	7.1	7.1	5.81	1.72	4.52	3.87
ENSMUSG00000005802	ENSMUST00000005952	Slc30a4	0.841369	0.733462	0.107907	0.509821	0.534072	-0.0242518	-0.132159	-0.199389	219	78	1293	46	3946	36	21407	0	0.877	-28.777	7	0	1	6	0	0	0	6.04	27.2727	7.44	4.19	3.72	6.05	1.4	3.95	3.02	4.88	3.95	6.28	13.02	4.42	3.72	3.72	3.26	10	5.12	1.16	2.79	7.91
ENSMUSG00000005803	ENSMUST00000005953	Sqor	0.8858	0.399922	0.485877	0.88737	0.360865	0.526505	0.0406276	-0.0390572	220	70	1353	48	231	39	44333	0	-0.407	-14.429	10	0	0	1	0	0	0	2.22	30.5122	8.22	5.11	3.78	4	1.78	5.33	3.56	7.56	1.78	6	8.67	7.11	3.33	4	6.22	4.67	6.22	1.33	4.44	6.89
ENSMUSG00000005804	ENSMUST00000005954	Bloc1s6	0.787795	0.34233	0.445465	0.713669	0.302759	0.410911	-0.034554	-0.0395715	120	60	519	52	2845	42	10973	0	-1.263	-5.588	5	0	1	1	0	0	0	2.46	39.7661	5.23	6.4	1.16	5.81	0.58	12.21	6.4	4.07	3.49	2.33	14.53	9.3	1.74	2.33	6.98	5.81	5.81	0	1.16	4.65
ENSMUSG00000005813	ENSMUST00000029804	Metap1	0.909385	0.669165	0.24022	0.933289	0.726626	0.206663	-0.0335573	0.0574607	144	78	1161	48	1381	41	30560	1.295	-0.934	-31.675	11	0	0	2	0	0	0	0	28.5714	6.74	5.7	3.11	5.44	4.4	6.48	3.63	7.77	4.15	5.18	6.74	5.7	2.33	2.85	5.18	5.7	6.48	1.55	3.89	6.99
ENSMUSG00000005823	ENSMUST00000233568	Gpr108	0.373608	-0.135755	0.509363	0.532697	0.146359	0.386338	-0.123025	0.282114	36	69	1710	54	659	54	13038	0.678	-3.983	-8.632	17	0	0	1	0	0	0	0	36.9718	5.45	4.39	3.69	3.51	1.58	5.98	4.75	6.68	2.99	6.15	12.3	5.1	1.76	5.27	5.1	9.14	4.22	1.41	3.69	6.85
ENSMUSG00000005824	ENSMUST00000005976	Tnfsf14	0.744456	0.767858	-0.0234013	0.952734	0.856025	0.0967099	0.120111	0.0881669	108	60	720	59	1019	51	4686	0.843	-11.17	-15.588	4	0	0	1	0	0	0	0	35.7143	6.28	9.21	2.51	3.35	1.26	4.18	4.6	12.13	3.35	2.51	13.39	2.09	1.26	2.93	5.02	6.69	4.18	2.09	3.35	9.62
ENSMUSG00000005846	ENSMUST00000119953	Rsl1d1	0.947294	0.686062	0.261232	0.901452	0.482912	0.418539	0.157308	-0.20315	76	62	1359	43	510	38	10362	0	6.431	-12.255	9	0	1	3	0	0	0	0	29.2683	6.19	4.87	3.98	2.65	0.88	8.19	3.54	3.98	1.99	4.87	9.29	14.82	1.33	2.88	5.31	11.28	7.08	0.44	0.88	5.53
ENSMUSG00000005871	ENSMUST00000115781	Apc	0.34381	0.450326	-0.106516	0.341815	0.430598	-0.0887829	0.0177329	-0.0197278	311	74	8427	45	3608	37	101206	0.72	4.603	-9.212	16	0	4	4	0	0	0	0	27.0395	6.77	5.91	4.88	5.48	1.42	7.23	5.27	4.77	2.24	3.67	7.23	6.87	1.96	1.71	6.62	15.38	6.05	0.5	1.78	4.24
ENSMUSG00000005873	ENSMUST00000006027	Reep5	0.521251	0.313595	0.207657	0.517418	0.315473	0.201945	-0.00571221	0.00187886	48	80	570	53	2234	42	28485	0.742	-3.617	-23.27	5	0	0	4	0	0	0	0	34.0426	8.99	3.7	3.17	5.82	2.12	5.29	1.06	5.82	1.06	5.29	11.11	8.47	3.7	6.88	3.17	6.88	3.7	2.12	4.76	6.88
ENSMUSG00000005881	ENSMUST00000006035	Ergic3	0.67205	0.23409	0.437961	0.481327	0.263439	0.217888	-0.220073	0.0293491	96	76	1152	54	129	53	10235	0.482	-6.232	-31.82	13	0	0	0	0	0	0	0	43.9791	4.96	3.92	3.92	6.01	2.61	6.79	4.44	7.31	3.92	3.92	9.4	6.79	3.13	5.48	3.92	5.48	5.22	0.26	3.66	8.88
ENSMUSG00000005882	ENSMUST00000109636	Uqcc1	0.689837	0.122119	0.567718	0.673184	0.174486	0.498698	-0.0690198	0.0523668	274	59	888	50	1471	49	83390	0	-1.166	-4.284	10	0	0	4	0	0	0	2.47	31.9728	4.41	5.76	4.41	4.07	2.37	6.1	6.78	5.08	1.69	4.07	10.51	6.1	4.41	4.07	4.07	6.1	6.44	3.05	3.39	7.12
ENSMUSG00000005883	ENSMUST00000050442	Spo11	0.933249	0.556013	0.377236						45	68	1191	47	473	33	13728	0	-0.869	-18.342	13	0	1	3	0	0	0	0	31.3924	7.32	5.56	3.03	7.07	1.77	3.54	3.28	4.29	1.52	8.33	10.86	6.57	4.55	3.54	4.8	8.33	6.57	1.26	3.03	4.8
ENSMUSG00000005886	ENSMUST00000068304	Ncoa2	-0.072604	-0.237868	0.165265	0.282124	0.313524	-0.0314003	-0.196665	0.551392	222	59	4182	53	3602	40	234925	2.335	-1.704	-2.835	22	0	0	12	0	0	0	0	39.0805	6.53	4.45	5.53	4.24	1.08	5.38	9.05	7.39	2.08	3.09	8.18	4.24	5.03	2.37	8.97	11.41	5.17	0.36	1.44	4.02
ENSMUSG00000005893	ENSMUST00000113460	Nr2c2	0.522324	0.509669	0.0126546	0.513238	0.608518	-0.0952801	-0.107935	0.0988492	432	73	1791	49	5424	42	81668	0.855	-0.521	4.557	15	0	0	8	0	0	0	0	32.437	7.89	4.7	3.36	5.54	2.52	5.37	6.38	5.87	1.68	7.21	9.4	5.03	2.52	2.85	4.36	10.23	6.54	0.5	2.35	5.7
ENSMUSG00000005897	ENSMUST00000092213	Nr2c1	0.766731	0.478356	0.288375	0.692119	0.590252	0.101867	-0.186508	0.111896	273	46	1773	48	330	42	47263	0	0.365	15.861	15	0	0	1	0	0	0	12.56	31.2394	7.12	4.41	3.56	4.75	3.05	6.44	5.08	6.27	3.56	5.93	10	5.25	3.05	4.41	4.92	8.81	5.42	0.51	2.37	5.08
ENSMUSG00000005899	ENSMUST00000006053	Smpd4	0.606304	0.180726	0.425578	0.475081	0.258625	0.216456	-0.209123	0.0778995	126	57	2472	54	2025	45	25475	0	-2.032	-6.748	20	0	0	4	0	0	0	2.41	32.6034	7.29	5.47	2.67	3.28	1.7	5.35	5.59	4.37	3.28	3.28	14.46	3.77	2.31	5.59	7.41	8.63	4.62	1.34	3.77	5.83
ENSMUSG00000005907	ENSMUST00000006061	Pex1	0.46008	-0.167652	0.627732	0.142413	0.0280631	0.114349	-0.513382	0.195715	323	63	3735	49	375	33	41165	0	-0.704	-8.342	23	0	4	1	0	0	0	0	29.0426	7.23	4.66	2.57	5.31	1.45	6.75	6.67	6.51	2.89	4.34	12.14	5.31	1.21	3.54	5.39	9.81	5.23	1.05	1.37	6.59
ENSMUSG00000005936	ENSMUST00000233197	Kctd20	0.916497	0.723286	0.193211	0.895806	0.655059	0.240748	0.0475367	-0.0682274	331	74	1260	49	2605	48	17292	1.879	-1.062	-6.313	8	0	0	0	0	0	0	0	33.4928	5.01	5.25	3.82	7.16	2.39	8.11	4.06	7.64	3.58	5.73	8.59	4.77	2.15	4.06	6.44	7.4	3.82	0.72	3.58	5.73
ENSMUSG00000005947	ENSMUST00000006101	Itgae	0.385882	0.241554	0.144328	0.520084	0.243887	0.276197	0.131869	0.00233312	35	59	3504	51	306	44	56864	0.863	-2.561	9.629	31	0	0	1	0	0	0	0	35.4202	6.6	4.54	4.54	5.48	2.4	5.83	5.31	7.28	2.4	4.97	9.17	5.06	1.97	4.88	3.68	8.57	5.57	0.69	2.74	8.31
ENSMUSG00000005949	ENSMUST00000006103	Ctns	0.769908	0.50977	0.260139	0.69887	0.365632	0.333238	0.0730994	-0.144138	144	53	1104	47	1322	50	15447	0	1.492	-1.241	11	0	0	0	0	0	0	0	26.2295	3.27	3.27	5.72	2.72	1.09	2.72	4.63	5.99	1.63	8.45	12.26	3.54	1.63	9.26	3.81	7.08	6.54	2.72	4.36	9.26
ENSMUSG00000005950	ENSMUST00000006104	P2rx5									176	73	1368	51	851	53	12265	0	-3.624	-34.864	13	0	0	2	0	0	0	0	40.3084	6.37	4.84	4.84	5.27	2.64	6.15	4.18	7.47	2.2	6.15	8.57	7.25	1.54	6.59	3.3	5.49	5.05	1.32	3.08	7.69
ENSMUSG00000005951	ENSMUST00000006105	Shpk	0.484346	-0.299371	0.783717	0.470426	-0.325122	0.795548	0.0118309	-0.0257507	59	62	1431	57	1318	48	25052	0.946	-8.696	-7.183	7	0	0	2	0	0	0	0	35.7895	10.92	4.83	2.31	4.41	1.89	4.2	6.72	8.19	2.1	3.36	10.71	2.31	2.73	4.41	5.88	8.19	5.46	1.89	1.47	7.98
ENSMUSG00000005958	ENSMUST00000006112	Ephb3									415	69	2982	57	788	58	18550	0	-6.285	-38.777	16	0	0	0	0	0	0	0	40.0202	7.96	5.94	3.73	4.93	2.92	5.94	3.73	6.75	1.41	4.23	8.56	3.93	2.52	3.63	6.65	7.96	6.04	1.61	3.42	8.16
ENSMUSG00000005968	ENSMUST00000196655	Tuft1	0.694254	0.308863	0.385392	0.70406	0.264371	0.439689	0.0542974	-0.0444919	16	68	1008	53	1132	51	45805	0	-3.423	5.716	11	0	0	3	0	0	0	0	46.1078	6.87	6.87	2.99	3.88	0.6	13.43	6.87	3.88	3.88	4.18	8.96	7.76	3.88	1.19	3.58	8.06	3.88	0.3	1.79	7.16
ENSMUSG00000005973	ENSMUST00000006128	Rcn1	0.758163	0.630208	0.127955	0.713657	0.57384	0.139816	0.0118608	-0.0563678	114	78	978	53	1628	43	13029	0.065	-2.033	-16.893	6	0	0	4	0	0	0	0	45.9877	5.23	6.15	3.69	12.62	0	11.08	3.08	5.54	3.38	3.38	9.85	8	1.85	4.31	3.38	4.31	4	1.85	3.69	4.62
ENSMUSG00000005981	ENSMUST00000006137	Trap1	0.350012	-0.0801297	0.430141	0.380949	0.259315	0.121635	-0.308507	0.339444	47	52	2121	52	152	46	37857	0.642	-4.151	-7.328	18	0	0	2	0	0	0	0	37.1631	8.22	6.09	2.27	5.24	0.85	8.64	5.24	4.67	2.41	5.67	11.19	6.8	2.55	3.97	3.54	7.22	5.1	0.71	3.4	6.23
ENSMUSG00000005982	ENSMUST00000186375	Naa60	0.734011	0.49701	0.237001	0.637583	0.606411	0.0311721	-0.205828	0.1094	130	70	729	49	1491	51	20088	0.7	1.679	-8.052	7	0	0	1	0	0	0	2.88	33.195	5.37	4.55	3.31	5.79	2.07	3.72	2.07	5.79	5.37	8.68	10.33	4.96	1.24	3.72	3.72	9.92	6.2	1.65	6.2	5.37
ENSMUSG00000005983	ENSMUST00000177323	1700037C18Rik	0.802633	0.479148	0.323485	0.468875	-0.538339	1.00721	0.683729	-1.01749	42	66	528	63	345	58	1905	0	-17.197	2.383	3	0	0	0	0	0	0	0	47.1264	8	7.43	2.29	2.29	2.29	4.57	5.14	12.57	3.43	0.57	12.57	2.86	2.86	0.57	12	10.86	4	2.29	1.71	1.71
ENSMUSG00000005986	ENSMUST00000056888	Ankrd13d	0.216894	0.236327	-0.019433	0.479998	0.553452	-0.0734543	-0.0540213	0.317125	165	71	1818	57	156	49	12956	0	-7.264	-24.574	15	0	0	2	0	0	0	2.61	41.8874	7.11	7.11	2.64	3.97	0.99	10.08	5.95	4.96	3.31	3.14	11.07	2.81	1.82	3.8	7.11	8.76	5.62	1.65	1.16	6.94
ENSMUSG00000006005	ENSMUST00000124973	Tpr	0.823387	0.502254	0.321133	0.795295	0.388479	0.406815	0.0856821	-0.113774	106	67	7296	44	28	38	56978	5.407	5.196	-5.154	52	0	7	0	0	0	0	0	27.4897	6.87	6.01	3.95	5.22	0.29	13.16	9.26	4.15	1.77	3.58	9.95	7.24	2.18	1.11	3.54	8.31	7.12	0.16	0.99	5.14
ENSMUSG00000006010	ENSMUST00000111913	Odr4	0.749071	0.35666	0.392411	0.623042	0.288106	0.334936	-0.0574748	-0.0685539	413	60	1344	40	1516	39	31776	0	4.85	2.962	14	0	1	2	0	0	0	13.92	17.713	6.26	5.15	4.7	5.82	2.24	7.38	5.15	4.7	2.24	6.26	9.4	6.26	1.57	2.46	3.36	9.17	6.26	1.12	2.46	8.05
ENSMUSG00000006014	ENSMUST00000164600	Prg4	0.75237	0.682152	0.0702187	0.569344	0.659996	-0.090652	-0.160871	-0.0221559	25	60	3666	50	572	27	16187	0	9.398	5.716	12	0	2	3	0	0	0	0	36.4754	3.52	3.11	2.87	2.7	1.8	12.37	1.88	3.11	0.82	2.13	3.28	11.71	0.66	1.88	19.66	5.81	17.12	0.49	1.8	3.28
ENSMUSG00000006014	ENSMUST00000164600	Prg4	0.75237	0.682152	0.0702187	0.569344	0.659996	-0.090652	-0.160871	-0.0221559	25	60	3666	50	572	27	16187	0	9.398	5.716	12	0	2	3	0	0	0	0	36.4754	3.52	3.11	2.87	2.7	1.8	12.37	1.88	3.11	0.82	2.13	3.28	11.71	0.66	1.88	19.66	5.81	17.12	0.49	1.8	3.28
ENSMUSG00000006014	ENSMUST00000161611	Prg4	0.75237	0.682152	0.0702187	0.569344	0.659996	-0.090652	-0.160871	-0.0221559	40	50	3666	50	115	24	16297	0	9.398	4.991	13	0	2	1	0	0	0	0	36.4754	3.52	3.11	2.87	2.7	1.8	12.37	1.88	3.11	0.82	2.13	3.28	11.71	0.66	1.88	19.66	5.81	17.12	0.49	1.8	3.28
ENSMUSG00000006014	ENSMUST00000161611	Prg4	0.75237	0.682152	0.0702187	0.569344	0.659996	-0.090652	-0.160871	-0.0221559	40	50	3666	50	115	24	16297	0	9.398	4.991	13	0	2	1	0	0	0	0	36.4754	3.52	3.11	2.87	2.7	1.8	12.37	1.88	3.11	0.82	2.13	3.28	11.71	0.66	1.88	19.66	5.81	17.12	0.49	1.8	3.28
ENSMUSG00000006019	ENSMUST00000094816	Dhx34	0.741619	0.00460329	0.737015	0.871885	0.372671	0.499214	-0.237801	0.368068	562	55	3438	60	73	57	24770	0	-10.048	-9.212	17	0	0	0	0	0	0	17.97	45.8042	8.03	8.56	1.92	5.5	1.92	6.29	7.07	5.85	2.71	3.14	11.7	3.58	1.22	3.76	6.46	7.51	4.63	0.87	2.62	6.64
ENSMUSG00000006021	ENSMUST00000006178	Kptn	0.457827	-0.443479	0.901306	0.61769	0.131219	0.486471	-0.414835	0.574698	64	63	1293	56	273	50	7622	0	-8.975	-31.53	12	0	1	1	0	0	0	0	37.9953	5.81	4.65	3.02	6.28	1.63	6.74	6.98	8.14	2.56	3.72	14.19	3.26	0.7	3.72	5.35	7.91	3.49	0.93	3.02	7.91
ENSMUSG00000006024	ENSMUST00000127637	Napa	0.540361	0.199394	0.340967	0.39002	0.251629	0.138391	-0.202576	0.0522344	69	73	207	56	249	50	14928	0.793	-11.793	-18.052	6	0	0	0	0	0	0	0	34.3284	10.29	5.88	2.94	1.47	7.35	7.35	7.35	7.35	1.47	0	8.82	5.88	2.94	7.35	5.88	8.82	4.41	2.94	0	1.47
ENSMUSG00000006050	ENSMUST00000173875	Sra1	0.178939	0.00636197	0.172577	0.544921	0.447102	0.097818	-0.0747586	0.440741	507	42	699	52	773	40	4135	0	-4.193	-8.777	5	1	1	3	0	0	0	0	31.1688	6.47	5.6	1.29	4.74	1.72	9.05	5.6	6.9	3.02	3.02	7.76	6.47	3.02	1.29	11.64	7.76	5.17	1.72	0.86	6.9
ENSMUSG00000006056	ENSMUST00000068686	Calcoco2	1	1	0						37	61	996	52	588	42	12639	0	-7.556	-2.255	6	0	0	0	0	0	0	0	43.9394	8.16	2.42	2.42	4.23	1.21	21.45	5.14	1.81	1.21	2.42	4.53	12.08	1.51	3.02	3.63	6.34	3.02	7.25	3.63	4.53
ENSMUSG00000006057	ENSMUST00000090541	Atp5g1	0.640175	-0.0188751	0.65905	0.429527	0.198559	0.230968	-0.428082	0.217434	52	57	411	56	4252	45	6819	0	-8.006	-0.661	5	0	0	3	0	0	2	0	34.0741	13.24	5.88	0.74	1.47	2.21	2.21	4.41	8.82	0	8.09	11.76	2.94	2.94	5.88	5.15	12.5	5.15	0	1.47	5.15
ENSMUSG00000006058	ENSMUST00000006217	Snf8	0.819215	0.0340975	0.785118	0.679672	0.39588	0.283792	-0.501326	0.361783	129	72	777	53	98	42	12546	1.669	-5.923	-42.11	8	0	0	0	0	0	0	0	36.965	9.3	3.88	1.94	4.26	0.78	9.3	6.2	8.53	2.71	5.04	12.02	8.53	2.33	3.88	2.71	3.88	4.26	1.55	2.71	6.2
ENSMUSG00000006095	ENSMUST00000006254	Tbcb	0.923223	0.522183	0.40104	0.888995	0.549717	0.339278	-0.0617613	0.0275335	579	57	735	54	102	50	8142	0	-5.191	-11.096	6	0	0	0	0	0	0	24.13	37.4486	6.97	6.97	2.05	6.15	2.05	10.25	2.87	7.79	1.23	2.87	6.97	6.15	2.46	3.69	4.1	9.84	2.87	0.41	5.74	8.61
ENSMUSG00000006127	ENSMUST00000006286	Inpp5k	0.530724	-0.0458387	0.576563	0.605054	0.00765681	0.597397	0.0208343	0.0534955	112	60	1407	50	1160	52	17884	0.598	1.611	-13.414	12	0	0	0	0	0	0	0	35.3319	3.42	3.85	5.98	6.2	0.64	4.49	4.27	4.91	2.78	6.62	11.97	4.27	3.21	4.7	6.2	8.33	4.49	2.35	5.77	5.56
ENSMUSG00000006134	ENSMUST00000231629	Crkl	0.912635	0.734915	0.17772	0.883108	0.59041	0.292697	0.114977	-0.144504	2	100	327	57	451	50	31652	0.759	-4.278	18.904	2	0	0	1	0	0	0	0	43.9252	4.63	9.26	2.78	6.48	0.93	4.63	4.63	4.63	3.7	4.63	10.19	1.85	2.78	4.63	5.56	11.11	6.48	0.93	4.63	5.56
ENSMUSG00000006154	ENSMUST00000171445	Eps8l1	0.369938	0.0840745	0.285863	0.490441	0.520172	-0.0297313	-0.315594	0.436098	164	48	2334	58	477	54	18690	1.527	-7.432	8.325	20	0	0	0	0	0	1	2.37	38.7887	7.98	9.27	2.19	4.38	1.03	9.65	6.31	6.05	2.06	1.93	9.65	3.99	1.16	2.19	8.62	7.34	5.15	1.8	1.67	7.59
ENSMUSG00000006169	ENSMUST00000109260	Clint1	0.703778	0.343067	0.360711	0.652683	0.404867	0.247816	-0.112895	0.0618002	188	80	1872	50	1338	37	58662	3.446	-1.007	-31.675	12	0	2	3	0	0	0	0	36.0129	7.22	4.17	5.78	6.42	0.16	4.98	4.82	8.35	1.28	2.41	6.58	6.42	5.94	3.69	6.42	12.36	5.62	1.28	1.61	4.49
ENSMUSG00000006179	ENSMUST00000150547	Prss16	1	0.0508919	0.949108						446	64	510	51	203	44	3862	0	-3.026	-17.328	5	1	0	1	0	0	0	0	31.5476	6.51	2.96	1.78	4.73	3.55	4.14	11.24	7.1	1.18	1.78	11.24	2.96	1.78	4.73	7.1	11.24	5.33	1.78	2.37	6.51
ENSMUSG00000006191	ENSMUST00000137225	Cdkal1	0.329825	-0.0529402	0.382766	-0.0463065	-0.139897	0.0935906	-0.289175	-0.086957	121	45	657	44	1741	39	333803	1.706	3.271	0.209	12	0	0	4	0	0	0	0	26.7281	5.05	6.42	5.05	6.88	2.29	5.96	6.42	6.88	1.83	9.17	7.8	8.26	0.92	1.83	5.5	6.88	3.21	1.38	2.29	5.96
ENSMUSG00000006205	ENSMUST00000006367	Htra1									69	67	1443	57	529	49	49458	0	-6.588	-17.617	9	0	0	0	0	0	0	0	42.1712	8.33	5.63	3.96	5.42	3.33	6.04	3.13	8.75	1.46	6.88	8.75	6.25	1.04	1.88	5.83	6.88	5.63	0	1.67	9.17
ENSMUSG00000006215	ENSMUST00000006377	Zbtb17	0.830463	0.25688	0.573583	0.868632	0.507065	0.361567	-0.212016	0.250185	238	63	2385	58	99	45	22572	0.776	-6.178	-5.299	16	0	0	1	0	0	0	9.88	49.0542	8.82	4.66	2.39	5.67	4.16	8.44	5.29	7.93	4.91	2.9	7.18	7.05	1.64	3.02	5.04	7.18	5.79	0.13	1.89	5.92
ENSMUSG00000006216	ENSMUST00000006378	Clcnkb									74	53	2064	56	232	54	11662	0	-7.617	-6.748	20	0	0	0	0	0	0	0	33.965	8.88	3.2	2.47	1.89	1.31	4.8	3.35	7.86	2.18	5.39	12.37	3.64	2.33	6.11	5.97	7.42	7.13	2.18	2.77	8.73
ENSMUSG00000006218	ENSMUST00000006380	Fam131c									83	82	822	60	528	59	15956	0	-9.432	-10.516	7	0	0	0	0	0	0	2.97	47.0588	8.42	4.4	2.2	8.42	2.56	6.59	6.59	6.23	3.66	2.56	9.89	2.2	1.1	2.56	7.33	12.45	4.4	2.56	1.83	4.03
ENSMUSG00000006219	ENSMUST00000105785	Fblim1									195	53	1128	59	1768	47	29991	0	-5.118	-1.675	9	0	0	1	0	0	0	5.63	39.8396	7.2	5.87	2.13	4	7.2	8	3.73	5.33	2.67	2.4	7.47	4.8	1.07	3.2	14.93	7.2	4	0.53	2.13	6.13
ENSMUSG00000006221	ENSMUST00000102486	Hspb7									1006	58	510	57	1253	55	4533	0	-3.683	-8.922	3	1	0	0	0	0	1	10.76	41.6667	8.88	7.69	2.37	6.51	0.59	6.51	2.96	4.14	4.14	4.14	5.33	2.96	3.55	6.51	6.51	14.79	7.69	0	0.59	4.14
ENSMUSG00000006235	ENSMUST00000006397	Epor									75	63	1524	61	162	39	4610	0	-10.391	-21.675	8	0	0	0	0	0	0	0	39.5257	6.9	5.33	1.38	4.93	2.17	7.1	2.56	7.3	2.56	2.17	13.41	1.78	0.99	2.96	10.06	12.23	5.13	2.56	2.56	5.92
ENSMUSG00000006241	ENSMUST00000006403	Ccdc159									247	59	1212	55	72	52	8402	0	-5.884	-12.835	13	0	0	0	0	0	0	0	44.7761	5.46	4.71	2.23	5.71	3.72	9.18	7.94	5.21	2.23	2.98	10.42	8.19	1.74	1.24	5.21	11.41	4.22	2.48	1.74	3.97
ENSMUSG00000006262	ENSMUST00000113229	Mob1b	0.340322	0.404355	-0.0640336	0.240067	0.344357	-0.10429	-0.0402565	-0.0599981	253	74	666	41	8048	35	43366	1.876	5.466	-9.646	6	0	1	16	0	0	0	0	25.4545	5.88	3.17	4.98	4.98	1.81	7.24	4.07	4.07	3.62	6.33	9.05	7.69	3.17	7.69	5.43	5.88	4.98	1.36	3.62	4.98
ENSMUSG00000006273	ENSMUST00000006435	Atp6v1b2	0.916165	0.557008	0.359157	0.857346	0.564628	0.292718	-0.0664395	0.00762035	147	75	1536	49	1142	47	25066	0	-1.225	-18.487	14	0	1	1	0	0	0	0	30.7843	8.02	6.07	3.91	5.28	1.17	6.85	4.11	7.63	1.57	7.44	8.41	4.31	3.33	3.72	6.07	5.68	5.68	0.2	3.72	6.85
ENSMUSG00000006276	ENSMUST00000212590	Eps15l1	0.382377	-0.0124256	0.394803	0.628379	0.267992	0.360387	-0.0344157	0.280418	18	71	1800	54	1558	48	44038	0.43	-2.263	10.209	16	0	0	0	0	0	0	0	39.6321	6.84	4.17	1.67	7.51	0.5	7.35	7.68	5.51	1.84	4.01	12.02	6.84	2	2.5	6.51	10.02	4.34	0.83	1.67	6.18
ENSMUSG00000006281	ENSMUST00000006444	Tep1	0.180046	0.0971364	0.0829096	0.505674	0.205086	0.300589	0.217679	0.107949	172	54	7890	53	109	36	46502	0.528	-4.245	-18.342	55	0	3	0	0	0	0	0	31.4307	7.49	5.21	2.62	4.03	2.36	6.12	5.82	6.31	3.31	3.35	14.53	4.56	1.41	2.93	6.28	8.63	5.06	2.02	1.9	6.05
ENSMUSG00000006288	ENSMUST00000006451	Ttc5	0.71056	-0.148464	0.859024	0.690661	0.0283485	0.662313	-0.196712	0.176813	31	70	1323	54	488	40	20105	1.969	-7.167	12.962	10	0	0	2	0	0	0	0	38.2688	7.5	3.86	3.18	4.55	1.36	7.73	7.5	6.36	2.73	1.14	11.82	6.59	2.5	2.27	4.55	9.32	4.09	1.14	3.18	8.64
ENSMUSG00000006289	ENSMUST00000159292	Osgep	0.740311	0.267282	0.473029	0.595287	0.289849	0.305438	-0.167591	0.0225668	115	60	1008	53	2265	45	11300	1.806	-5.314	-17.038	11	0	0	5	0	0	0	0	33.5329	9.25	6.27	3.28	4.78	2.69	6.27	3.58	10.15	2.09	5.67	8.36	3.28	3.88	3.58	3.88	4.48	7.16	0.9	2.09	8.36
ENSMUSG00000006299	ENSMUST00000178235	Aamp	0.591146	-0.0963754	0.687522	0.536149	0.151808	0.384342	-0.30318	0.248183	57	60	1311	57	388	54	4835	2.057	-7.112	-13.994	11	0	0	0	0	0	0	0	38.6207	7.34	2.98	1.83	8.26	2.75	9.4	3.44	10.09	2.52	2.06	9.17	3.44	1.61	2.98	4.82	6.88	7.34	2.52	1.15	9.4
ENSMUSG00000006301	ENSMUST00000016309	Tmbim1	0.859931	0.534027	0.325904	0.649169	0.2796	0.369569	0.0436646	-0.254427	323	64	930	51	1125	51	16159	0	-0.138	-1.675	12	0	1	1	0	0	0	1.4	25.6494	6.15	3.24	2.59	3.24	2.27	2.59	3.24	7.44	2.27	9.06	7.77	2.27	2.27	5.5	8.74	5.5	7.12	0.97	7.77	10.03
ENSMUSG00000006304	ENSMUST00000113820	Arpc2	0.783755	0.493764	0.289991	0.578914	0.393047	0.185868	-0.104124	-0.100717	122	77	903	45	414	38	31713	1.937	4.629	-23.994	11	0	0	0	1	0	0	0	29.4314	7.33	5.67	5.33	6.67	0.67	7.67	2	4.67	3.67	5	7.67	8.33	2.33	6.33	3.33	5.33	6	0	4	8
ENSMUSG00000006307	ENSMUST00000108154	Kmt2b	0.305322	0.24381	0.0615122	0.580825	0.590616	-0.00979097	-0.0713032	0.346806	9	66	8142	58	303	54	19869	3.152	-8.911	-15.443	37	0	2	1	0	0	0	0	37.3894	7.34	8.59	1.7	4.46	2.84	7.74	4.13	8.74	2.29	2.1	8.22	4.46	1.29	2.54	12.97	8.18	4.24	0.96	1.33	5.9
ENSMUSG00000006310	ENSMUST00000108151	Zbtb32	-0.525986	-0.572374	0.0463876	0.800495	0.457635	0.34286	0.296473	1.03001	128	51	1398	56	249	49	3262	0	-8.108	3.832	6	0	0	1	0	0	0	6.13	38.5776	7.53	7.96	0.86	2.58	2.8	6.67	5.38	8.17	3.44	2.58	9.46	3.23	2.37	2.58	9.89	12.47	6.02	1.94	1.51	2.58
ENSMUSG00000006311	ENSMUST00000108147	Etv2									22	49	1008	59	18	16	2237	0	-8.154	10.354	6	0	0	0	0	0	0	0	41.6168	6.57	5.07	3.28	5.97	2.09	5.67	3.88	11.04	2.39	1.49	7.16	3.58	1.49	3.58	9.55	8.36	6.87	4.78	3.58	3.58
ENSMUSG00000006313	ENSMUST00000006476	Upk1a	-0.325735	-3.39128	3.06555	0.932609	1	-0.0673905	-3.13294	4.39128	141	52	774	55	506	54	9756	0	-6.439	-13.125	8	0	0	0	0	0	0	0	31.6406	7.78	4.28	1.95	4.28	3.89	3.89	1.95	8.17	1.56	7.39	8.95	1.56	4.67	6.23	3.89	5.84	7.39	3.11	5.45	7.78
ENSMUSG00000006315	ENSMUST00000207779	Tmem147	0.802792	0.276095	0.526697	0.736052	0.329909	0.406143	-0.120554	0.0538146	87	76	339	50	348	50	1807	0	-3.153	-22.69	7	0	0	0	0	0	0	0	31.5315	8.93	1.79	5.36	3.57	3.57	4.46	1.79	8.04	0.89	4.46	10.71	3.57	3.57	10.71	3.57	6.25	5.36	2.68	5.36	5.36
ENSMUSG00000006333	ENSMUST00000006496	Rps9	0.0182324	-0.104976	0.123209	0.211704	0.0291937	0.18251	0.0593015	0.13417	97	56	585	55	69	32	2905	0.69	-6.281	-13.125	5	0	0	0	0	0	0	0	44.5596	5.15	13.92	2.06	5.67	0.52	6.7	3.61	8.25	2.06	5.67	11.86	9.79	1.03	3.61	3.61	3.61	2.58	1.03	2.06	7.22
ENSMUSG00000006335	ENSMUST00000155592	Tfpt	0.818654	0.070345	0.748309	0.873558	0.527359	0.346199	-0.40211	0.457014	310	52	750	57	31	44	9561	0	-7.109	-7.907	6	0	0	0	1	0	0	0	39.5161	6.43	12.05	2.01	6.02	0.4	13.25	4.82	8.43	0.8	2.01	9.64	2.01	1.2	3.61	8.43	6.83	4.82	0.4	1.61	5.22
ENSMUSG00000006342	ENSMUST00000095541	Susd2	0.402372	0.0329417	0.36943	-0.150623	0.45769	-0.608313	-0.977743	0.424748	48	60	2463	56	640	51	7286	0	-5.858	-7.183	15	0	1	0	0	0	0	0	37.2405	6.22	5.12	3.54	5.12	3.41	3.78	4.39	8.54	2.56	2.93	10	2.68	2.07	4.15	6.83	9.51	6.83	2.68	3.9	5.73
ENSMUSG00000006344	ENSMUST00000072217	Ggt5	0.574095	0.420324	0.153772	0.441835	0.561774	-0.119939	-0.273711	0.14145	370	54	1722	58	2318	45	27861	0	-8.779	-12.98	12	0	0	2	0	0	0	0	38.4615	9.08	5.76	4.19	2.97	1.22	4.54	5.58	10.12	2.44	5.24	11.17	2.62	1.75	3.32	6.81	6.63	4.89	1.4	2.09	8.2
ENSMUSG00000006345	ENSMUST00000134503	Ggt1	0.319554	0.454575	-0.135021	0.488104	-0.0461097	0.534214	0.669235	-0.500685	260	56	1707	55	173	58	17545	0	-5.848	-11.675	14	0	0	0	0	0	0	1.87	38.9771	9.86	4.93	3.7	4.58	1.06	5.28	3.7	8.45	2.29	6.51	8.8	4.58	2.29	4.05	4.93	6.87	5.99	0.7	2.99	8.45
ENSMUSG00000006356	ENSMUST00000200380	Crip2	0.682772	0.386959	0.295814	0.109629	0.34525	-0.235622	-0.531435	-0.0417086	536	61	255	58	73	60	4532	0	-8.146	3.107	7	0	0	0	0	0	0	0	43.3735	3.57	5.95	2.38	4.76	8.33	4.76	2.38	11.9	4.76	2.38	4.76	8.33	1.19	2.38	9.52	3.57	5.95	1.19	5.95	5.95
ENSMUSG00000006360	ENSMUST00000006523	Crip1	0.66829	0.183455	0.484836	0.432076	0.307566	0.124511	-0.360325	0.124111	102	65	234	54	109	58	1866	0	-9.852	0.209	5	0	0	0	0	0	0	0	40.7895	5.19	3.9	1.3	2.6	9.09	7.79	0	12.99	6.49	0	3.9	12.99	2.6	5.19	7.79	5.19	5.19	1.3	3.9	2.6
ENSMUSG00000006362	ENSMUST00000127984	Cbfa2t3	1	0.63406	0.36594	0.399534	1	-0.600466	-0.966406	0.36594	216	61	1863	62	5566	52	73969	0	-6.491	6.73	12	0	0	2	0	0	3	0	48.1422	9.03	7.58	3.06	4.03	2.9	7.74	4.35	5.81	4.52	2.1	9.35	4.03	1.94	1.94	10.16	10.16	6.13	1.13	0.97	3.06
ENSMUSG00000006369	ENSMUST00000057410	Fbln1	0.276157	0.162642	0.113515	-0.289044	-1.40119	1.11215	0.998634	-1.56383	185	77	2118	56	1356	47	80587	0	-5.222	-4.139	17	0	0	1	0	0	0	0	39.4886	4.11	6.38	5.82	6.1	10.21	7.09	4.26	7.52	2.55	5.67	6.1	2.41	1.13	3.69	5.25	8.09	4.54	0.14	3.12	5.82
ENSMUSG00000006373	ENSMUST00000073339	Pgrmc1	0.86578	0.601771	0.264009	0.579719	0.582882	-0.00316264	-0.267172	-0.0188886	81	64	588	58	1188	35	7874	0	-3.58	-7.907	3	0	0	2	0	0	0	0	45.8763	6.67	5.64	2.05	11.28	1.03	8.72	2.56	9.23	1.54	2.56	11.79	6.15	1.03	5.13	7.18	4.1	5.13	0.51	3.08	4.62
ENSMUSG00000006386	ENSMUST00000102798	Tek	0.399244	1	-0.600756						341	52	3372	48	941	38	135640	0	0.072	-2.255	23	0	5	3	0	0	0	10.9	29.0553	6.5	5.52	4.99	4.81	3.38	6.68	4.01	6.95	2.23	5.88	8.99	5.16	2.05	3.38	5.97	6.06	5.79	1.6	3.56	6.5
ENSMUSG00000006390	ENSMUST00000006557	Elovl1	0.913981	0.58337	0.330611	0.847574	0.6036	0.243974	-0.0866367	0.0202299	137	63	840	49	834	52	4861	0.646	0.119	-7.328	8	0	1	0	0	0	0	1.95	27.3381	5.02	3.58	3.23	1.79	0.72	1.79	3.58	5.02	3.94	8.6	11.47	4.3	5.38	6.09	5.38	7.89	3.94	3.94	6.81	7.53
ENSMUSG00000006392	ENSMUST00000019229	Med8	0.947934	0.822372	0.125562	0.899918	0.725503	0.174415	0.0488533	-0.0968693	15	92	807	50	323	40	5746	0	-1.448	9.919	7	0	1	1	0	0	0	0	34.0824	7.46	4.48	5.22	4.48	0.37	6.72	8.58	8.21	1.49	3.36	10.82	6.34	2.99	2.24	7.84	8.21	4.1	0.75	1.12	5.22
ENSMUSG00000006395	ENSMUST00000006562	Hyi	0.488933	-0.0941811	0.583114	0.56035	0.10391	0.456441	-0.126673	0.198091	19	78	804	61	87	55	2731	0	-15.081	14.412	9	0	0	0	0	1	0	0	46.2406	10.11	7.12	3	4.12	0.75	7.87	5.99	10.86	2.62	3	11.61	1.87	2.25	3.75	6.74	3	4.49	1.87	2.62	6.37
ENSMUSG00000006398	ENSMUST00000006565	Cdc20	0.836256	0.204414	0.631842	0.675786	0.455215	0.220571	-0.411271	0.250801	231	63	1500	55	62	23	4452	0	-4.44	-12.69	10	0	0	0	0	0	0	0	35.5422	9.42	6.21	4.41	4.21	1.4	4.41	5.41	7.62	3.81	4.01	8.62	4.61	1.6	1.6	5.81	10.82	4.21	3.21	2.2	6.41
ENSMUSG00000006403	ENSMUST00000219033	Adamts4									390	52	2538	59	1458	46	10214	0	-9.773	-8.922	9	1	0	4	0	0	0	0	38.7441	7.93	6.51	2.49	4.85	4.14	3.31	4.5	10.41	3.2	2.25	10.18	3.31	2.01	3.31	8.76	7.81	5.44	1.66	2.37	5.56
ENSMUSG00000006411	ENSMUST00000006578	Nectin4				0.900914	0.467964	0.43295			316	62	1527	58	1793	49	18247	0	-8.956	-6.893	9	0	0	1	0	0	0	0	37.0809	5.91	6.69	2.76	4.92	1.57	8.27	4.92	8.07	2.95	1.97	10.83	2.36	1.57	2.17	7.68	8.86	6.1	1.18	2.17	9.06
ENSMUSG00000006412	ENSMUST00000135941	Pfdn2	0.811438	0.0264591	0.784978	0.702359	0.404753	0.297606	-0.487372	0.378293	42	63	465	56	1228	43	13585	2.845	-4.737	-2.69	4	0	0	3	0	0	0	0	45.7516	10.39	5.84	3.9	2.6	0.65	12.99	5.19	11.04	1.3	3.9	9.09	9.09	2.6	1.3	1.3	7.79	2.6	0	0.65	7.79
ENSMUSG00000006418	ENSMUST00000078050	Rnf114	0.757007	0.376583	0.380424	0.859236	0.4502	0.409036	0.0286117	0.0736168	370	60	690	54	1442	50	13085	1.76	-3.799	-17.183	6	0	0	1	0	0	0	3.37	39.9123	6.99	6.11	3.06	5.68	6.99	6.55	5.24	3.49	3.06	4.8	4.8	5.68	2.18	3.93	7.42	8.3	4.8	0.44	3.06	7.42
ENSMUSG00000006423	ENSMUST00000115248	C330007P06Rik	0.526649	0.333903	0.192746	0.173916	0.136057	0.0378597	-0.154886	-0.197846	114	55	669	48	2557	37	15704	0.837	-2.52	-15.878	7	0	0	1	0	0	0	0	38.009	5.86	7.21	2.25	5.86	3.15	9.91	5.41	4.95	1.35	3.6	6.31	11.71	3.6	3.15	4.5	4.5	5.41	0	3.6	7.66
ENSMUSG00000006435	ENSMUST00000111808	Neurl1a				0.603656	1	-0.396344			647	78	1725	66	1786	53	80622	0	-12.563	-10.081	6	0	0	1	1	0	0	5.67	50.6108	8.01	6.97	2.61	5.05	4.18	3.31	2.96	8.89	3.48	4.18	10.98	3.48	1.22	3.48	8.19	9.58	4.88	1.22	1.39	5.92
ENSMUSG00000006442	ENSMUST00000006611	Srm	0.54297	0.262999	0.279971	0.937605	0.604923	0.332682	0.0527118	0.341924	117	77	909	58	312	55	3117	0	-7.649	-13.849	7	0	0	1	0	0	0	0	44.8505	4.97	4.3	2.65	5.63	3.31	6.95	6.29	6.95	2.65	4.97	9.27	4.97	3.31	4.97	6.29	7.62	3.31	0.99	3.31	7.28
ENSMUSG00000006445	ENSMUST00000006614	Epha2	0.879849	1	-0.120151	1	0.844116	0.155884	0.276036	-0.155884	113	66	2934	57	866	50	28145	0	-7.272	-15.443	17	0	1	2	0	0	0	0	42.5205	7.27	5.73	2.97	4.71	2.66	7.27	3.79	7.06	1.64	4.5	7.78	5.02	2.97	3.48	5.12	7.78	6.24	1.64	3.89	8.5
ENSMUSG00000006456	ENSMUST00000006625	Rbm14	0.749315	0.554982	0.194333	0.746289	0.660017	0.0862713	-0.108062	0.105035	126	64	2010	59	1029	46	11066	0	-7.997	-6.168	3	0	0	0	0	0	0	0	38.024	19.58	6.13	2.09	2.84	0.45	2.39	7.47	8.97	1.05	1.2	5.38	2.84	1.79	2.24	6.73	13.45	4.19	0.15	7.03	4.04
ENSMUSG00000006457	ENSMUST00000006626	Actn3	0.617564	0.225405	0.392159						55	61	2703	55	129	55	16694	0	-5.556	-2.11	21	0	0	0	0	1	0	0	44.6051	9	7.11	4.56	5.67	1.22	10.11	6.11	5.67	2.33	5.22	10.67	5.22	2.89	3.33	3.22	4.67	4.11	1.89	2.33	4.67
ENSMUSG00000006463	ENSMUST00000006632	Zdhhc24	0.898758	0.7045	0.194258	0.795704	0.766914	0.02879	-0.165468	0.0624138	77	64	855	62	1626	46	6726	0	-13.769	-16.458	3	0	0	2	0	0	0	0	31.0954	11.97	5.28	1.41	2.11	4.58	1.41	3.87	10.56	3.87	1.41	20.07	0.35	2.11	3.17	6.34	4.93	3.17	3.17	2.46	7.75
ENSMUSG00000006464	ENSMUST00000053506	Bbs1	0.437921	-0.0931081	0.531029	-0.25488	-0.489332	0.234452	-0.296578	-0.396223	26	61	1782	56	3794	48	19751	0	-6.207	4.267	17	0	1	1	0	0	0	0	39.3581	9.11	5.23	2.7	4.05	1.18	5.73	4.22	5.73	2.53	3.2	14.33	5.56	2.53	3.2	6.24	7.42	6.41	0.51	2.53	7.59
ENSMUSG00000006471	ENSMUST00000100329	Ndor1	0.190326	-0.21905	0.409376	0.517109	0.244074	0.273035	-0.136341	0.463124	32	64	1596	55	2889	54	10563	0	-6.993	0.933	12	0	0	2	0	0	0	0	34.9057	7.91	7.34	2.45	4.14	2.07	5.84	7.53	5.84	1.51	4.14	12.05	2.26	0.94	5.84	7.72	6.97	4.9	1.88	2.26	6.4
ENSMUSG00000006476	ENSMUST00000102931	Nsmf	0.16659	0.0266971	0.139893	0.603779	0.636934	-0.0331545	-0.173047	0.610237	188	73	1530	57	1112	56	8469	0	-5.432	-32.255	15	0	0	0	0	0	0	0	48.0315	7.66	7.86	2.75	5.11	1.57	7.66	3.73	5.89	3.73	4.72	8.25	6.09	2.95	3.54	7.07	9.63	3.73	1.38	2.55	4.13
ENSMUSG00000006494	ENSMUST00000006669	Pdk1	0.491685	0.256116	0.235569	0.405408	0.145165	0.260243	0.0246741	-0.110951	146	77	1305	50	3734	42	30635	1.846	-2.045	-27.328	11	0	1	5	0	0	0	0	32.5635	6.45	6.68	3.69	5.07	1.38	5.76	3.69	5.99	2.53	4.15	9.91	4.84	3	4.15	5.99	8.99	4.38	0.69	5.07	7.6
ENSMUSG00000006498	ENSMUST00000172282	Ptbp1	0.800081	0.446871	0.35321	0.64121	0.433742	0.207468	-0.145741	-0.0131288	287	63	1668	56	1155	49	10006	1.405	-2.854	-5.588	14	0	0	2	0	0	1	0	43.3213	10.63	3.24	6.13	4.5	0.54	3.06	5.41	7.39	2.7	5.05	9.55	5.95	2.34	4.68	5.77	10.09	3.96	0	1.98	7.03
ENSMUSG00000006517	ENSMUST00000006692	Mvd	0.531298	0.0380471	0.493251	0.690769	0.216967	0.473802	-0.019449	0.17892	56	56	1206	59	494	58	9822	0	-7.893	-12.11	10	0	0	0	0	0	0	0	46.75	9.48	5.74	2.49	6.23	1.5	5.24	6.48	6.73	2.24	4.49	9.73	4.24	1.75	3.49	4.99	6.73	7.23	1.25	2.24	7.73
ENSMUSG00000006519	ENSMUST00000017604	Cyba	0.735285	0.115921	0.619364	0.540091	0.301283	0.238808	-0.380556	0.185362	63	65	579	59	102	51	8155	0	-8.949	-17.328	6	0	0	0	0	0	0	0	38.2199	10.94	5.21	2.08	0.52	1.56	6.77	4.17	9.9	0.52	6.25	9.38	5.21	2.08	2.6	9.38	4.17	6.25	2.08	3.65	7.29
ENSMUSG00000006526	ENSMUST00000006701	Stimate	0.337386	0.239444	0.097942	0.461746	0.36134	0.100406	0.00246384	0.121896	141	80	867	54	2734	51	51621	0	-4.972	-37.183	8	0	1	1	0	0	0	0	34.8432	7.29	6.25	3.13	4.17	1.39	7.29	3.13	7.99	1.74	5.56	11.81	5.21	3.47	5.9	4.17	6.25	2.08	2.43	2.08	8.68
ENSMUSG00000006527	ENSMUST00000228006	Sfmbt1	0.624102	0.311201	0.3129	0.488848	0.350242	0.138606	-0.174294	0.0390403	209	64	2592	47	498	43	101856	0	1.182	-5.299	21	0	3	0	0	0	0	0	31.0905	5.56	5.21	3.71	5.68	3.13	8.11	4.4	6.37	2.55	4.63	9.73	7.3	1.04	3.71	6.49	7.42	4.63	1.85	2.67	5.79
ENSMUSG00000006538	ENSMUST00000164097	Ihh									458	76	1236	60	774	53	6358	0	-12.11	-9.357	3	1	0	2	0	0	0	0	42.6829	10.22	8.27	2.43	4.38	1.46	5.84	2.68	7.79	3.89	1.95	11.44	3.16	1.46	4.14	7.06	6.81	4.62	1.95	2.68	7.79
ENSMUSG00000006567	ENSMUST00000006742	Atp7b	0.699622	1	-0.300378	0.652736	0.676859	-0.0241231	0.276255	-0.323141	250	68	4389	54	1866	49	67521	0	-4.911	-10.081	21	0	1	2	0	0	0	1.73	35.8658	8.48	3.9	3.01	4.38	1.78	5.54	4.65	7.59	2.26	7.32	8.62	5.06	3.08	2.74	4.92	8.62	6.02	0.68	1.64	9.71
ENSMUSG00000006574	ENSMUST00000006749	Slc4a1									292	65	2790	56	1463	49	16457	0	-6.298	1.368	20	0	0	1	2	0	1	4.86	33.2974	6.14	4.95	2.05	4.2	0.65	6.57	3.55	7.32	1.51	5.71	15.82	3.55	2.48	5.17	6.89	6.46	5.27	1.18	2.69	7.86
ENSMUSG00000006575	ENSMUST00000006750	Rundc3a	0.298008	0.112241	0.185768	0.688887	0.625194	0.0636937	-0.122074	0.512953	273	73	1341	58	432	57	9153	0	-7.906	-19.212	11	0	1	0	1	0	0	3.22	47.4157	7.62	6.5	3.36	4.48	1.79	9.64	3.59	4.93	1.57	4.26	10.76	5.16	2.24	3.14	5.16	11.66	5.38	1.57	2.91	4.26
ENSMUSG00000006576	ENSMUST00000124341	Slc4a3									216	68	3684	59	3282	50	15907	0	-9.983	-10.516	23	0	0	4	0	0	1	0	41.7618	7.33	6.76	1.22	4.73	0.73	7.74	3.1	7.25	2.93	3.99	12.8	4.16	1.87	4.4	9.05	7.66	4.89	1.06	1.47	6.85
ENSMUSG00000006585	ENSMUST00000006760	Cdt1	0.85348	0.545827	0.307653	0.91	0.725044	0.184956	-0.122697	0.179217	41	57	1674	61	474	45	5114	0	-9.125	-3.559	10	0	0	1	0	0	0	0	45.1439	9.69	9.16	1.62	3.41	1.97	6.82	5.57	3.95	1.62	1.62	10.77	4.85	2.33	2.15	11.31	7.36	6.28	0.36	1.62	7.54
ENSMUSG00000006586	ENSMUST00000098256	Runx1t1									353	59	1734	53	1230	37	106336	0	0.587	-1.82	11	0	1	2	0	0	0	0	37.6736	7.28	7.8	4.16	5.03	2.08	7.11	5.2	4.68	4.33	2.43	8.32	4.16	2.08	1.91	9.53	9.71	7.97	1.04	1.73	3.47
ENSMUSG00000006587	ENSMUST00000006762	Snai3	-0.626112	0.213813	-0.839925	0.603656	0.788927	-0.185271	0.654654	0.575114	119	70	864	60	645	53	6526	0	-8.69	-12.11	3	0	0	0	0	0	0	0	43.3566	8.36	7.67	2.09	2.44	6.27	5.23	2.44	6.62	6.62	2.09	10.8	4.18	1.05	2.44	9.76	8.01	6.62	1.39	2.09	3.83
ENSMUSG00000006589	ENSMUST00000006764	Aprt	0.621347	0.115079	0.506269	0.532594	0.196721	0.335873	-0.170395	0.0816424	58	61	543	59	248	54	2254	0	-9.352	-0.661	5	0	0	0	0	0	0	0	39.1061	6.67	6.67	0	6.11	1.67	6.11	3.33	8.33	1.67	5.56	15.56	5	1.11	5	6.67	8.89	2.78	0	2.22	6.67
ENSMUSG00000006599	ENSMUST00000006774	Gtf2h1	0.913318	0.285824	0.627494	0.790067	0.219541	0.570526	-0.0569687	-0.0662826	201	70	1644	43	891	39	27698	1.749	3.785	7.6	15	0	4	3	0	0	0	3.28	26.0073	7.31	4.39	5.48	4.75	1.1	6.58	6.4	4.39	2.56	4.75	9.32	8.41	2.74	3.84	3.66	8.96	5.67	0.91	2.93	5.85
ENSMUSG00000006611	ENSMUST00000091706	Hfe									140	51	1080	55	2352	42	8821	0	-6.247	-12.835	6	0	0	1	0	0	0	3.13	38.2682	5.85	5.01	2.79	5.29	1.95	5.85	5.29	7.52	2.79	3.62	13.65	4.18	1.95	3.34	5.85	6.69	5.29	3.62	2.79	6.69
ENSMUSG00000006641	ENSMUST00000080431	Slc5a6	0.605619	0.576853	0.028766	0.70798	0.826172	-0.118192	-0.146958	0.249319	542	56	1905	53	771	47	12889	0	-4.413	-0.951	18	0	3	0	0	0	0	4.92	26.0664	8.36	3	2.37	2.21	2.52	1.89	3.47	8.68	2.37	5.05	14.67	1.58	3.79	5.68	5.21	8.83	5.68	1.58	3.79	9.31
ENSMUSG00000006649	ENSMUST00000006825	Nphs1	-1.05096	-3.07121	2.02025	0.669096	-1.30923	1.97832	-0.0419323	1.76199	419	50	3771	58	418	39	27499	0.867	-7.972	2.672	30	0	0	1	2	0	0	8.15	38.5657	7.56	5.81	3.26	5.02	1.67	6.53	3.98	8.12	1.99	3.26	10.99	3.26	1.11	2.79	8.04	8.6	6.21	1.67	2.15	7.96
ENSMUSG00000006651	ENSMUST00000006828	Aplp1	0.784317	-0.247111	1.03143	0.189563	-0.37004	0.559604	-0.471824	-0.12293	67	79	1965	60	311	49	10554	0	-11.613	-31.748	17	0	0	2	0	0	0	0	42.7259	7.49	8.87	1.53	3.98	1.83	10.55	7.03	7.65	3.36	2.14	11.16	1.99	2.6	2.14	9.02	7.19	3.52	0.76	1.68	5.5
ENSMUSG00000006673	ENSMUST00000006851	Qrich1	0.856727	0.598591	0.258137	0.826401	0.707612	0.118789	-0.139348	0.109022	272	55	2334	50	725	37	43050	1.02	0.32	11.658	11	0	1	0	0	0	0	3.36	33.7629	7.59	3.22	3.09	2.96	1.03	6.18	14.16	4.25	2.19	5.02	7.98	3.86	1.8	2.32	7.98	7.08	7.08	0.9	3.09	8.24
ENSMUSG00000006675	ENSMUST00000006853	P4htm	0.855314	0.232282	0.623032	0.830733	0.534123	0.29661	-0.326422	0.301841	103	79	1512	58	226	57	18806	0	-8.074	-29.936	9	0	0	1	0	0	0	0	41.4343	6.56	7.95	3.58	5.77	1.39	7.55	5.57	7.16	3.78	2.98	10.54	2.39	2.78	2.98	5.96	5.77	4.57	1.59	3.38	7.75
ENSMUSG00000006676	ENSMUST00000085044	Usp19	0.642625	0.206111	0.436514	0.759889	0.431272	0.328617	-0.107897	0.225161	187	61	3972	56	361	41	11473	2.312	-7.489	-19.212	27	0	0	0	0	0	0	0	39.1074	7.63	6.95	2.72	5.06	2.27	8.09	5.22	6.73	2.19	2.42	9.45	4.91	1.13	3.7	8.69	7.71	4.54	1.06	1.89	7.63
ENSMUSG00000006678	ENSMUST00000006856	Pola1	0.310328	0.147189	0.16314	0.193895	-0.1579	0.351796	0.188656	-0.305089	44	56	4398	41	904	38	327389	0.826	4.681	1.223	37	0	8	2	0	0	0	0	22.4727	5.26	4.23	4.23	7.24	2.46	8.12	4.44	4.57	1.71	5.94	9.9	9.01	2.25	3.82	5.26	5.94	4.23	0.96	3.62	6.83
ENSMUSG00000006699	ENSMUST00000030417	Cdc42	0.815674	0.528347	0.287327	0.630862	0.23676	0.394103	0.106775	-0.291587	104	52	576	43	768	36	35938	0.903	3.843	11.803	6	0	0	2	0	0	0	0	22.6316	5.76	3.14	2.62	5.76	3.66	6.81	3.66	4.71	1.05	4.71	8.9	8.38	1.05	4.71	7.85	4.71	8.9	0.52	3.66	9.42
ENSMUSG00000006705	ENSMUST00000236493	Pknox1	0.678177	0.437212	0.240965	0.695678	0.555767	0.13991	-0.101054	0.118555	98	49	972	53	277	46	13519	0	-3.784	3.397	8	0	0	0	0	0	0	0	37.2671	7.12	3.41	4.64	3.72	1.24	4.95	9.6	5.88	1.86	4.64	9.6	4.33	3.1	1.24	5.88	10.22	7.43	1.55	1.24	8.36
ENSMUSG00000006711	ENSMUST00000006893	D130043K22Rik	-2.60453	-1.84732	-0.757209						256	61	3246	53	1471	47	56136	0	-4.844	-6.603	21	0	0	4	0	0	0	3.16	35.463	6.75	4.81	3.61	5.64	1.85	6.48	4.9	6.85	2.04	3.24	10.08	3.61	1.85	2.41	6.57	10.36	7.4	1.48	2.59	7.49
ENSMUSG00000006715	ENSMUST00000110382	Gmnn	0.879998	0.595423	0.284575	0.820654	0.643694	0.176959	-0.107615	0.0482711	118	61	621	45	224	36	10079	0	2.642	2.383	7	0	0	0	0	0	0	0	30.2439	7.77	4.85	5.34	6.31	1.46	15.53	5.83	3.88	0.97	2.43	8.25	8.25	1.94	1.94	4.37	9.71	3.4	0.97	1.94	4.85
ENSMUSG00000006717	ENSMUST00000006900	Acot13	0.88301	0.828597	0.0544136	0.733104	0.296427	0.436678	0.382264	-0.53217	211	60	423	46	87	39	13570	0.536	2.253	0.209	3	0	0	0	0	0	0	0	28.0576	7.14	2.86	3.57	2.86	1.43	6.43	2.86	7.86	3.57	5.71	10	8.57	6.43	2.14	2.86	5.71	10.71	0	0.71	8.57
ENSMUSG00000006720	ENSMUST00000102978	Zfp184	1	0.699959	0.300041						544	59	2214	45	440	33	15668	0	4.348	-15.588	6	0	0	1	0	0	0	11.41	31.6576	4.21	4.21	3.12	2.58	6.11	8.55	6.51	5.83	7.19	3.66	5.97	9.77	0.68	4.07	4.21	8.68	8.55	0.54	2.99	2.58
ENSMUSG00000006724	ENSMUST00000165764	Cyp27b1				0.416203	0.215012	0.201191			31	57	1524	56	825	49	4720	0	-7.66	7.89	9	0	0	2	0	0	0	0	33.5968	7.3	8.68	1.97	3.75	1.78	5.92	3.94	7.89	4.14	2.96	13.81	1.78	1.58	3.94	7.1	7.69	5.33	1.58	1.58	7.3
ENSMUSG00000006728	ENSMUST00000120226	Cdk4	0.861446	0.430629	0.430817	0.659464	0.546258	0.113206	-0.317611	0.115628	173	66	477	55	64	54	3400	0.802	-10.285	-4.284	7	0	0	0	0	0	0	0	31.8471	6.96	8.86	1.27	3.16	4.43	6.96	2.53	8.86	1.9	1.9	10.76	4.43	1.27	1.27	5.7	8.86	5.7	2.53	3.8	8.86
ENSMUSG00000006731	ENSMUST00000217678	B4galnt1	0.727252	0.569373	0.15788	0.729038	0.720795	0.00824346	-0.149636	0.151422	294	71	579	59	1339	57	7104	1.357	-7.372	-14.719	10	1	0	0	0	0	0	0	38.7435	10.42	7.81	2.6	3.65	1.56	5.21	6.77	4.17	0.52	2.6	17.71	2.08	1.04	1.56	10.94	10.42	1.04	0.52	3.13	6.25
ENSMUSG00000006732	ENSMUST00000120542	Mettl1	0.531879	0.203024	0.328855	0.518018	0.11958	0.398437	0.0695826	-0.083444	21	66	687	54	336	51	3658	0.507	-2.252	-1.241	6	0	0	0	0	0	0	0	40.5286	8.33	7.02	2.63	4.39	4.39	4.39	3.95	5.7	3.95	3.51	10.09	6.58	3.07	4.82	8.33	6.58	3.51	1.32	3.51	3.95
ENSMUSG00000006736	ENSMUST00000060991	Tspan31	0.864775	0.46764	0.397135	0.700402	0.345113	0.355289	-0.0418456	-0.122527	87	57	633	49	836	48	2985	0	-3.151	-27.183	6	0	0	0	0	0	0	0	24.8804	8.57	4.29	4.76	2.86	5.24	1.9	2.86	9.52	2.38	6.67	13.33	3.33	2.38	7.62	0.95	8.1	3.81	1.43	0.95	9.05
ENSMUSG00000006740	ENSMUST00000025083	Kif5b	0.710373	0.633741	0.0766323	0.553525	0.547591	0.00593481	-0.0706975	-0.0861502	416	69	2892	42	2724	33	40522	3.453	4.457	-14.864	26	0	2	11	0	0	0	6.66	28.6902	7.17	5.61	5.19	5.71	1.35	11.21	6.96	4.36	2.08	4.15	8.83	10.07	2.39	1.87	1.97	6.65	5.4	0.31	2.18	6.54
ENSMUSG00000006763	ENSMUST00000143082	Saal1	0.834492	-0.0789541	0.913446	0.788606	0.213088	0.575518	-0.337928	0.292042	48	70	1425	50	3255	45	24573	0.991	-3.846	-0.951	12	0	1	5	0	0	0	0	31.9239	4.85	3.8	2.32	7.81	4.22	9.92	5.27	5.06	1.69	5.06	11.18	4.64	2.32	3.59	5.91	7.81	4.22	1.05	0.84	8.44
ENSMUSG00000006764	ENSMUST00000006949	Tph2									133	61	1467	49	1026	39	106382	0	0.596	4.701	11	0	1	1	0	0	0	0	33.0595	5.12	5.74	2.66	5.94	2.66	8.4	4.1	5.53	2.25	3.48	10.25	6.97	2.05	5.33	4.71	7.38	5.94	0.82	4.3	6.35
ENSMUSG00000006782	ENSMUST00000103120	Cnp	0.931313	0.508307	0.423006	0.866432	0.467196	0.399236	-0.0237698	-0.0411108	162	75	1263	56	932	50	6825	2.489	-8.337	2.817	4	0	0	1	0	0	0	2.45	44.3914	6.9	4.76	0.95	5.71	1.67	6.67	5	8.33	2.14	3.1	12.14	10.24	1.67	4.76	4.76	6.19	5.24	1.19	3.33	5.24
ENSMUSG00000006784	ENSMUST00000092684	Ttc25									194	57	1875	52	171	50	26357	0	-2.196	8.325	12	0	0	0	0	0	0	2.22	46.2279	7.05	6.09	3.53	6.25	0.96	10.74	6.73	5.77	1.76	4.81	11.22	10.1	1.6	2.4	1.92	7.85	3.37	1.28	3.04	3.53
ENSMUSG00000006800	ENSMUST00000109249	Sulf2	0.544791	0.556013	-0.0112221						253	60	2628	55	1699	47	82575	0	-3.283	-8.052	21	0	0	3	0	0	0	2.37	44.6224	4.11	6.63	5.37	5.83	2.51	4.8	4.23	7.31	4	3.66	10.17	7.31	2.51	3.43	5.49	6.86	5.26	1.83	4.46	4.23
ENSMUSG00000006818	ENSMUST00000007012	Sod2	0.823506	0.558581	0.264925	0.514477	0.415219	0.0992582	-0.165667	-0.143362	229	67	669	53	4963	38	12318	2.489	-4.048	-12.98	5	0	0	12	0	0	0	7.54	41.1765	9.46	3.6	5.86	3.15	1.8	5.86	4.5	10.36	4.95	4.5	9.91	7.21	0.9	2.7	4.5	4.05	4.95	2.7	4.05	4.95
ENSMUSG00000006850	ENSMUST00000007046	Tmco6	0.727687	-0.0143759	0.742063	0.771558	0.315868	0.45569	-0.286373	0.330244	104	53	1485	57	234	40	7330	0	-9.332	-19.357	12	0	1	1	0	0	0	0	37.5254	9.72	6.48	2.63	2.23	2.63	8.1	8.1	5.06	2.02	3.04	20.45	2.23	1.82	2.63	4.66	5.67	4.25	1.01	1.21	6.07
ENSMUSG00000006906	ENSMUST00000068054	Stambp	0.82184	0.760117	0.0617233	0.863891	0.595356	0.268535	0.206812	-0.164761	333	53	1275	48	756	40	29506	0	0.276	3.542	10	0	0	3	1	0	0	0	31.9149	4.48	5.66	2.59	4.72	2.83	9.91	5.66	4.95	3.3	6.37	9.2	7.55	1.89	4.01	7.08	5.42	5.42	0.24	2.83	5.9
ENSMUSG00000006920	ENSMUST00000107285	Ezh1	0.39235	0.0420518	0.350298	0.608742	0.292835	0.315908	-0.0343902	0.250783	117	56	2253	49	1823	51	35335	0.435	0.349	4.701	21	0	0	2	0	0	0	3.56	34.713	6.27	5.6	5.47	6.13	4.93	7.2	4.53	4.27	2.4	4	6.53	8.4	2.8	4.67	5.87	7.2	4.13	1.07	2.93	5.6
ENSMUSG00000006930	ENSMUST00000103124	Hap1									10	60	1797	58	313	48	7229	0	-8.375	12.817	11	0	0	3	0	0	0	0	46.3987	7.53	6.69	1.84	5.85	1.17	13.38	7.53	7.36	2.34	2.51	8.19	5.02	2.34	1.51	7.36	7.19	5.18	0.67	2.34	4.01
ENSMUSG00000006932	ENSMUST00000007130	Ctnnb1	0.909562	0.763254	0.146308	0.905303	0.774865	0.130438	-0.01587	0.0116109	287	72	2346	51	990	39	27108	0	-3.552	-3.414	15	0	0	0	0	0	0	0	30.2564	10.24	4.99	3.97	5.38	1.41	6.15	6.27	7.17	3.46	4.23	12.04	3.33	3.84	1.66	4.35	5.38	6.15	0.9	2.18	6.91
ENSMUSG00000006941	ENSMUST00000007139	Eif1b	0.84595	0.741718	0.104232	0.887463	0.525205	0.362258	0.258026	-0.216512	320	73	342	48	373	40	2840	0	1.33	7.455	4	0	0	1	0	0	0	0	43.75	5.31	3.54	3.54	7.96	1.77	6.19	8.85	7.96	2.65	7.96	7.96	10.62	0.88	5.31	2.65	1.77	6.19	0	2.65	6.19
ENSMUSG00000006998	ENSMUST00000007212	Psmd2	0.83607	0.281106	0.554964	0.727423	0.323103	0.40432	-0.150644	0.0419973	65	72	2727	50	169	42	11763	2.131	-3.146	-19.487	21	0	1	0	0	0	0	0	31.4223	8.59	4.52	4.07	5.84	1.54	8.59	3.3	7.16	2.31	3.63	13	5.62	3.63	2.86	3.74	6.61	4.41	0.55	2.86	7.16
ENSMUSG00000007021	ENSMUST00000007236	Syngr3									136	69	690	61	1139	52	4864	0	-14.459	-14.139	4	0	0	1	0	0	0	0	38.5965	11.79	6.55	2.18	3.93	1.75	2.62	4.8	11.35	0	2.62	8.73	0.87	0.87	9.17	4.8	7.86	6.11	2.18	2.62	9.17
ENSMUSG00000007029	ENSMUST00000087315	Vars	0.557317	0.198087	0.35923	0.603449	0.364129	0.23932	-0.11991	0.166042	278	74	3792	59	67	51	15336	1.994	-10.691	11.078	30	0	1	0	0	0	0	0	40.9667	9.9	6.73	2.06	5.23	1.82	6.33	4.51	7.36	2.14	3.09	10.53	5.07	1.35	3.48	7.76	5.62	4.43	2.53	2.69	7.36
ENSMUSG00000007030	ENSMUST00000007245	Vwa7	1	0.84998	0.15002	0.782314	0.813134	-0.0308201	-0.18084	-0.0368455	204	58	2676	60	1433	50	10163	0	-9.834	-2.545	17	0	0	2	0	0	0	5.65	37.6404	8.19	6.17	1.46	4.38	1.01	4.94	4.49	8.87	2.92	2.47	13.36	1.68	1.23	4.71	9.32	8.98	5.95	1.57	1.01	7.3
ENSMUSG00000007033	ENSMUST00000007248	Hspa1l									173	62	1926	53	373	43	6583	0.97	-3.033	2.383	2	0	1	1	3	0	0	0	44.5312	8.74	4.99	5.15	7.02	1.09	7.18	3.59	7.64	1.4	6.71	7.64	8.11	2.34	3.59	3.59	4.84	7.02	0.31	2.5	6.55
ENSMUSG00000007035	ENSMUST00000097338	Msh5	0.542469	0.381294	0.161176	0.388833	0.0369408	0.351892	0.190717	-0.344353	40	69	2502	54	136	46	18122	0	-4.987	-15.299	25	0	0	0	0	0	0	0	36.0577	6.48	5.52	2.4	6	1.92	6.12	4.08	6	2.64	6.36	14.05	4.08	2.04	4.56	5.88	8.4	4.44	0.6	2.16	6.24
ENSMUSG00000007036	ENSMUST00000007251	Abhd16a	0.652156	-0.0208149	0.672971	0.750062	0.400215	0.349847	-0.323124	0.42103	34	79	1677	59	234	42	13697	0.803	-10.608	-19.212	20	0	1	1	0	0	0	0	41.6517	8.6	7.71	3.23	4.3	1.97	5.38	4.48	6.27	2.69	3.41	11.29	2.87	1.97	4.3	5.91	7.53	4.66	2.51	3.94	6.99
ENSMUSG00000007038	ENSMUST00000007253	Neu1	0.791614	0.587655	0.203959	0.725594	0.577027	0.148567	-0.0553922	-0.0106282	154	65	1230	60	1090	50	4669	0.644	-11.364	-22.98	6	0	0	1	0	0	0	4.18	44.3627	7.33	5.87	3.42	6.6	1.96	4.4	3.67	9.29	1.96	4.65	8.56	3.42	1.47	4.16	6.11	9.05	5.87	2.2	2.44	7.58
ENSMUSG00000007039	ENSMUST00000007255	Ddah2	0.907444	0.244332	0.663112	0.797828	0.447387	0.350441	-0.312671	0.203055	300	60	858	61	184	45	3057	0	-14.264	-3.849	7	0	0	0	0	0	0	4.46	35.2113	10.18	6.67	1.05	5.61	2.11	5.61	2.81	12.63	2.46	1.75	15.09	2.46	1.4	2.46	7.02	7.37	5.61	0.7	0.35	6.67
ENSMUSG00000007041	ENSMUST00000007257	Clic1	0.894596	0.409108	0.485488	0.73473	0.408104	0.326626	-0.158863	-0.00100341	482	62	726	52	258	46	8784	0.633	-1.57	-3.27	6	0	0	0	1	0	1	4.81	37.9167	7.88	4.15	5.39	4.98	2.49	9.54	3.32	5.39	1.24	3.32	12.45	7.05	1.24	4.98	5.81	4.56	6.22	0.41	3.32	6.22
ENSMUSG00000007050	ENSMUST00000114011	Lsm2	0.868273	0.847753	0.02052	0.764648	0.59845	0.166198	0.145678	-0.249303	203	71	288	49	349	46	4012	0	0.299	-8.342	5	0	0	0	0	0	0	0	32.9787	4.21	3.16	3.16	8.42	2.11	4.21	7.37	3.16	2.11	4.21	12.63	8.42	2.11	4.21	3.16	7.37	4.21	0	4.21	11.58
ENSMUSG00000007080	ENSMUST00000007296	Pole	0.424517	0.0655584	0.358959	0.600678	0.171608	0.42907	0.0701109	0.10605	82	66	6852	50	229	46	51169	0.829	-1.286	-16.893	49	0	2	0	0	0	0	0	33.3918	6.26	5.83	3.46	5.3	2.1	8.19	4.73	4.56	2.85	5.96	9.59	6.04	2.67	4.42	4.82	7.23	4.64	1.45	3.68	6.22
ENSMUSG00000007080	ENSMUST00000007296	Pole	0.424517	0.0655584	0.358959	0.600678	0.171608	0.42907	0.0701109	0.10605	82	66	6852	50	229	46	51169	0.829	-1.286	-16.893	49	0	2	0	0	0	0	0	33.3918	6.26	5.83	3.46	5.3	2.1	8.19	4.73	4.56	2.85	5.96	9.59	6.04	2.67	4.42	4.82	7.23	4.64	1.45	3.68	6.22
ENSMUSG00000007080	ENSMUST00000112482	Pole	0.424517	0.0655584	0.358959	0.600678	0.171608	0.42907	0.0701109	0.10605	47	65	582	49	118	47	4895	0.829	-0.7	-16.893	6	0	1	0	0	0	0	0	34.375	4.66	8.81	2.59	8.29	0.52	7.77	2.07	6.22	2.59	3.63	9.33	8.81	2.59	4.15	5.18	8.81	3.11	1.04	3.63	6.22
ENSMUSG00000007080	ENSMUST00000112482	Pole	0.424517	0.0655584	0.358959	0.600678	0.171608	0.42907	0.0701109	0.10605	47	65	582	49	118	47	4895	0.829	-0.7	-16.893	6	0	1	0	0	0	0	0	34.375	4.66	8.81	2.59	8.29	0.52	7.77	2.07	6.22	2.59	3.63	9.33	8.81	2.59	4.15	5.18	8.81	3.11	1.04	3.63	6.22
ENSMUSG00000007097	ENSMUST00000085913	Atp1a2	0.398366	-0.13203	0.530396	0.567089	0.322621	0.244468	-0.285928	0.454651	172	60	3063	55	2992	47	26356	0	-6.642	-22.545	23	1	1	2	1	0	0	0	38.7635	7.94	4.9	3.73	5.49	2.25	6.67	3.73	7.75	1.18	7.55	9.61	5.39	2.75	4.22	4.12	6.08	6.27	1.08	2.16	7.16
ENSMUSG00000007207	ENSMUST00000005509	Stx1a	0.471682	-0.543468	1.01515	0.542247	0.140945	0.401302	-0.613848	0.684412	99	78	867	55	1196	58	27619	0.85	-3.059	-6.603	10	0	0	0	0	0	0	0	52.2648	5.56	7.64	2.43	7.64	1.04	12.15	3.82	3.82	1.74	10.42	5.56	7.99	4.17	2.78	1.04	9.03	5.9	0	1.74	5.56
ENSMUSG00000007216	ENSMUST00000204095	Zfp775	0.907129	0.608227	0.298902	0.958008	0.852218	0.10579	-0.193111	0.243991	109	59	1617	61	2417	51	21165	0	-11.362	-10.081	3	0	0	0	0	0	1	1.73	48.0447	6.88	10.59	2.04	1.3	5.95	5.95	7.62	8.74	6.69	2.23	7.43	4.28	0.56	2.97	7.25	7.43	5.39	2.42	0.93	3.35
ENSMUSG00000007279	ENSMUST00000106729	Scube2									93	80	2907	51	563	49	66990	0	-2.545	-32.11	22	0	2	0	0	0	0	0	34.5398	4.34	5.68	5.06	5.37	8.37	6.71	4.13	9.19	3.31	2.79	7.64	5.48	1.24	3.72	4.96	7.33	6.92	0.31	2.79	4.65
ENSMUSG00000007338	ENSMUST00000007482	Mrpl49	0.89553	0.388974	0.506556	0.937858	0.445495	0.492363	-0.0141928	0.0565208	49	68	501	53	1214	46	4164	0.151	-4.812	-16.313	4	0	0	3	0	0	0	0	34.5455	4.22	7.83	2.41	4.22	0.6	6.63	5.42	6.63	2.41	4.22	10.24	6.63	1.81	3.61	10.84	4.82	5.42	2.41	3.61	6.02
ENSMUSG00000007379	ENSMUST00000172288	Dennd2c	0.695598	0.45056	0.245038	0.619616	0.522172	0.097444	-0.147594	0.0716125	280	41	2763	49	1936	41	42183	0	-0.617	0.209	19	0	2	1	0	0	0	14.91	30.9032	4.46	7.07	2.93	4.46	2.39	8.37	4.67	5.65	2.17	4.13	9.35	6.96	1.3	5	7.61	9.13	4.46	0.76	3.04	6.09
ENSMUSG00000007411	ENSMUST00000084953	Mark3	0.602812	0.299178	0.303634	0.726564	0.636261	0.0903031	-0.213331	0.337083	524	75	2235	47	606	39	81695	0.583	1.637	-9.501	17	0	2	3	0	0	0	5.45	31.4939	6.32	8.33	4.84	4.97	1.34	6.85	3.23	6.32	2.42	5.24	7.93	6.85	2.28	2.96	5.24	10.89	5.78	0.54	2.69	4.97
ENSMUSG00000007415	ENSMUST00000007559	Gatad1	0.788204	0.669411	0.118793	0.654669	0.54464	0.110029	-0.00876388	-0.124771	315	79	801	53	1429	39	7974	0.819	-7.594	-21.386	5	0	0	4	0	0	0	0	41.1321	6.77	4.51	1.5	2.63	2.26	5.26	3.76	13.16	2.63	6.02	4.14	8.27	1.5	3.38	7.52	8.65	8.27	1.13	4.14	4.51
ENSMUSG00000007458	ENSMUST00000112610	M6pr	0.699804	0.375983	0.323821	0.250006	0.231633	0.0183724	-0.305448	-0.14435	472	58	837	49	1230	42	8961	1.233	-3.231	1.223	8	0	0	0	0	0	0	9.43	27.7978	5.76	5.76	5.04	5.4	3.24	8.27	3.24	7.91	2.52	4.32	10.43	4.32	2.16	5.04	2.88	8.63	2.16	1.44	2.88	8.63
ENSMUSG00000007476	ENSMUST00000113654	Lrrc8a	0.932181	0.912927	0.0192539	0.917012	0.93786	-0.0208476	-0.0401015	0.0249334	99	77	2433	57	1662	48	26071	0.699	-5.08	-17.762	3	0	0	2	0	0	0	0	46.6007	4.44	5.43	4.81	4.94	1.98	6.91	3.09	3.09	2.47	6.79	14.94	6.91	1.6	4.32	4.57	5.93	6.05	1.73	3.95	6.05
ENSMUSG00000007480	ENSMUST00000172148	Mc5r				-6.27817	-6.17647	-0.101704			29	68	1119	49	2756	40	4851	0	0.58	-1.965	2	0	0	6	0	0	0	0	31.5364	5.91	5.38	5.38	2.42	4.3	3.23	1.88	4.57	2.69	9.68	11.02	3.49	5.38	5.65	2.96	9.14	4.3	1.08	4.03	7.53
ENSMUSG00000007564	ENSMUST00000007708	Ppp2r1a	0.871606	0.405697	0.46591	0.76322	0.309355	0.453865	-0.0120446	-0.0963416	195	66	1770	53	445	51	20606	0.847	-4.394	-10.661	15	0	1	0	0	0	0	3.18	34.3537	9.68	4.58	3.57	6.11	2.38	7.98	3.57	3.4	1.87	5.26	13.75	5.43	2.38	3.06	4.41	6.45	4.75	0.85	1.7	8.83
ENSMUSG00000007570	ENSMUST00000133527	Fance	0.718617	-0.0865357	0.805153	0.865339	0.417551	0.447789	-0.357364	0.504086	78	73	1155	64	518	54	13001	0	-17.151	-29.212	8	0	0	0	0	0	0	0	41.5144	8.85	7.55	0.52	4.17	2.86	8.07	5.21	10.16	2.34	0	19.01	2.86	0.52	1.56	9.38	8.07	2.6	0.78	0	5.47
ENSMUSG00000007589	ENSMUST00000227842	Tinf2	0.766149	0.332524	0.433625	0.759523	0.45639	0.303133	-0.130491	0.123866	164	67	1260	54	577	49	5128	1.147	-3.833	-20.661	9	0	1	0	0	0	0	0	34.9282	8.59	5.49	2.39	3.34	2.15	8.59	4.53	4.3	4.3	1.19	11.46	5.73	1.91	2.86	11.22	9.79	3.82	1.19	1.19	5.97
ENSMUSG00000007591	ENSMUST00000228395	Tssk4	0.971671	0.683631	0.288041	0.83419	0.218643	0.615547	0.327506	-0.464987	165	52	1017	52	91	40	2356	0	-0.922	4.412	4	0	1	0	0	0	0	0	38.8724	6.8	4.73	2.96	3.25	1.18	6.21	5.03	5.33	2.07	5.92	11.83	7.1	2.96	2.96	4.44	8.58	6.21	1.18	5.62	5.62
ENSMUSG00000007594	ENSMUST00000007738	Hapln4									104	71	1203	66	2341	51	7406	0	-19.42	-12.545	5	0	0	2	0	0	0	0	42.1053	12.75	8.75	2.25	4.75	2.75	3.75	3	14.5	2.75	0.75	8.75	2.25	0.75	3	6.5	3.25	3.5	3.25	3.5	9.25
ENSMUSG00000007603	ENSMUST00000007747	Dus3l	0.102375	-0.256585	0.35896	0.644388	0.363416	0.280972	-0.0779882	0.620001	78	59	1914	60	33	24	5064	0.66	-10.025	-11.675	13	0	0	0	0	0	0	0	45.7547	7.69	8.63	2.51	5.18	3.77	7.06	5.18	8.32	2.04	3.14	9.73	4.4	2.2	3.61	6.91	3.92	5.49	1.26	2.2	6.75
ENSMUSG00000007610	ENSMUST00000007754	Gtpbp3	0.760928	-0.0902541	0.851182	0.912039	0.512034	0.400005	-0.451176	0.602288	685	50	1479	63	636	47	5298	0	-15.54	-11.096	9	0	0	1	0	0	0	0	40.9369	11.59	7.32	1.42	5.08	2.64	5.89	5.08	9.15	2.44	2.24	16.06	1.63	0.41	2.24	5.49	7.93	5.08	0.81	0.81	6.71
ENSMUSG00000007613	ENSMUST00000044234	Tgfbr1	0.771646	0.758376	0.0132692	0.677344	0.64914	0.0282034	0.0149342	-0.109236	5	80	1500	44	1356	40	58827	0	0.975	-8.487	9	0	4	2	0	0	0	0	20.2811	8.42	6.21	3.41	5.01	3.81	6.41	3.01	6.01	3.21	7.01	9.02	5.21	3.01	2.81	4.21	5.61	6.61	1.6	2.61	6.81
ENSMUSG00000007617	ENSMUST00000109498	Homer1	0.607549	0.552463	0.0550863	0.307681	0.32964	-0.0219596	-0.0770459	-0.222823	195	41	579	48	41	40	97168	0	0.246	-3.414	6	0	0	0	0	0	0	0	35.0785	9.38	5.21	5.21	3.65	1.04	15.63	8.85	2.6	2.6	3.13	15.1	8.33	0.52	1.04	0	6.77	5.73	1.04	0.52	3.65
ENSMUSG00000007646	ENSMUST00000153073	Rad51c	0.326399	0.316508	0.00989168	-0.0113774	0.308025	-0.319403	-0.329294	-0.00848238	85	44	1017	44	959	46	25916	0	0.762	-3.762	10	0	2	2	0	0	0	0	22.8487	7.4	4.14	2.66	3.85	2.96	8.58	5.62	7.69	3.85	6.21	13.02	5.03	1.78	3.55	3.25	4.73	6.8	0.59	1.48	6.8
ENSMUSG00000007646	ENSMUST00000153073	Rad51c	0.326399	0.316508	0.00989168	-0.0113774	0.308025	-0.319403	-0.329294	-0.00848238	85	44	1017	44	959	46	25916	0	0.762	-3.762	10	0	2	2	0	0	0	0	22.8487	7.4	4.14	2.66	3.85	2.96	8.58	5.62	7.69	3.85	6.21	13.02	5.03	1.78	3.55	3.25	4.73	6.8	0.59	1.48	6.8
ENSMUSG00000007646	ENSMUST00000067692	Rad51c	0.326399	0.316508	0.00989168	-0.0113774	0.308025	-0.319403	-0.329294	-0.00848238	102	49	1101	43	2741	43	27879	0	3.109	-3.762	9	0	3	4	0	0	0	0	23.5616	7.92	4.64	2.73	3.83	2.73	8.47	6.01	6.01	3.28	6.01	12.02	4.64	1.64	4.37	4.1	5.74	7.1	0.55	1.64	6.56
ENSMUSG00000007646	ENSMUST00000067692	Rad51c	0.326399	0.316508	0.00989168	-0.0113774	0.308025	-0.319403	-0.329294	-0.00848238	102	49	1101	43	2741	43	27879	0	3.109	-3.762	9	0	3	4	0	0	0	0	23.5616	7.92	4.64	2.73	3.83	2.73	8.47	6.01	6.01	3.28	6.01	12.02	4.64	1.64	4.37	4.1	5.74	7.1	0.55	1.64	6.56
ENSMUSG00000007653	ENSMUST00000007797	Gabrb2									427	55	1425	45	2137	39	209272	0	3.169	-2.255	10	0	0	2	1	0	0	8.49	27.2727	6.54	6.96	5.27	6.12	0.84	3.38	2.53	4.64	1.27	7.17	9.7	5.27	4.01	4.85	4.22	5.91	6.54	1.9	5.27	7.59
ENSMUSG00000007655	ENSMUST00000115453	Cav1									304	56	444	48	1998	38	33813	0	4.609	0.499	2	0	1	6	0	0	0	0	36.9863	5.44	2.72	2.04	6.8	2.04	6.12	2.04	3.4	3.4	13.61	6.12	6.12	1.36	8.16	3.4	6.12	6.8	2.72	4.08	7.48
ENSMUSG00000007656	ENSMUST00000007800	Arpp19	0.895214	0.604434	0.290781	0.696293	0.475974	0.220319	-0.0704616	-0.12846	199	74	339	49	3508	37	22596	0.028	0.895	-2.835	3	0	0	10	0	0	0	0	37.8378	12.5	3.57	1.79	6.25	0	8.93	6.25	6.25	1.79	0.89	7.14	14.29	3.57	1.79	8.93	6.25	3.57	0	2.68	3.57
ENSMUSG00000007659	ENSMUST00000007803	Bcl2l1	0.807522	0.579975	0.227548	0.733567	0.716492	0.0170749	-0.210473	0.136517	238	55	702	55	1477	55	51061	0	-5.086	-1.241	3	0	0	1	0	0	0	3.27	40.5172	9.01	6.44	5.15	4.72	0.43	9.01	4.29	7.3	1.72	2.58	8.15	2.58	2.15	5.58	3	9.87	4.72	3	2.58	7.73
ENSMUSG00000007670	ENSMUST00000007814	Khsrp	0.531441	0.274448	0.256994	0.599271	0.61388	-0.0146086	-0.271602	0.339432	89	73	2247	60	1642	50	10438	4.329	-13.539	-3.27	18	0	0	1	0	0	0	0	43.3735	8.42	4.01	3.34	4.68	1.07	3.61	8.42	18.18	1.74	5.08	2.81	4.14	1.87	2.01	15.51	4.14	3.07	0.94	2.81	4.14
ENSMUSG00000007721	ENSMUST00000007865	Ccdc124	0.715948	0.02893	0.687018	0.529102	0.246233	0.282869	-0.404149	0.217303	488	56	654	61	214	60	5709	1.277	-8.335	-3.125	5	0	0	0	0	0	0	0	56.9444	12.44	11.98	3.69	4.15	0	15.21	5.99	1.84	1.38	0.92	9.68	11.52	2.3	1.84	5.53	4.15	1.84	0.92	0.46	4.15
ENSMUSG00000007739	ENSMUST00000174047	Cct4	0.86821	0.390287	0.477923	0.913426	0.252593	0.660833	0.18291	-0.137694	104	63	363	51	114	39	6447	0.221	-2.285	-1.096	5	0	0	0	0	0	0	0	35.2941	10.83	6.67	3.33	6.67	1.67	0.83	5	7.5	1.67	5.83	7.5	8.33	4.17	1.67	6.67	9.17	5	0.83	1.67	5
ENSMUSG00000007777	ENSMUST00000109098	0610009B22Rik	1	0.985712	0.0142877	0.950457	1	-0.049543	-0.0638307	0.0142877	208	63	423	43	261	29	3489	0	4.71	-1.965	2	0	0	2	0	0	0	11.28	26.6187	6.43	3.57	7.14	6.43	0	6.43	1.43	4.29	6.43	4.29	8.57	6.43	5	10	3.57	5.71	2.14	1.43	3.57	7.14
ENSMUSG00000007783	ENSMUST00000063761	Cpt1c									270	56	2397	57	126	59	15479	0	-5.547	-8.632	19	0	1	0	0	0	0	7.79	36.5119	8.4	6.27	2.26	4.76	2.13	4.39	5.51	5.64	5.14	2.88	13.28	2.63	1.88	5.51	5.01	9.02	5.26	2.26	2.51	5.26
ENSMUSG00000007812	ENSMUST00000196069	Zfp655	0.863999	0.629758	0.234241	0.812431	0.530704	0.281727	0.0474859	-0.0990539	129	65	264	58	757	40	6120	0	-8.862	-6.878	4	0	0	1	0	0	0	0	39.5349	11.49	3.45	1.15	3.45	1.15	10.34	9.2	6.9	2.3	1.15	8.05	0	2.3	6.9	13.79	8.05	3.45	0	2.3	4.6
ENSMUSG00000007815	ENSMUST00000007959	Rhoa	0.782806	0.354928	0.427878	0.44979	0.232269	0.217521	-0.210356	-0.122659	502	62	582	48	1113	38	31806	1.535	-0.16	1.513	6	0	0	3	0	0	1	10.29	32.8125	7.25	6.22	3.11	7.77	3.11	8.29	2.59	6.22	1.04	5.7	7.77	8.81	3.11	3.63	5.7	3.63	4.15	1.04	2.59	8.29
ENSMUSG00000007817	ENSMUST00000162645	Zmiz1	-0.418393	-0.102903	-0.31549	0.329058	0.523881	-0.194823	0.120667	0.626784	567	64	3219	58	3696	50	207520	0.83	-3.163	-2.98	24	0	0	4	0	0	0	6.1	45.3782	6.72	3.82	6.44	3.82	1.77	2.89	7.37	7.84	3.54	2.61	7.37	2.71	3.73	2.99	14.27	9.24	5.32	0.84	2.61	4.1
ENSMUSG00000007827	ENSMUST00000112830	Ankrd26	0.373864	0.194948	0.178916	0.374264	0.321288	0.0529759	-0.12594	0.12634	169	58	5046	45	1715	35	60919	0.547	3.004	-6.603	34	0	5	8	0	0	0	2.97	33.9881	6.31	6.25	4.7	5.59	1.43	12.37	6.9	3.75	2.74	3.15	10.17	9.1	2.5	1.96	2.56	9.34	4.52	0.54	1.49	4.64
ENSMUSG00000007833	ENSMUST00000107815	Aldh16a1	0.453882	0.0557265	0.398156	0.704489	0.366353	0.338136	-0.0600201	0.310627	103	66	2265	61	317	49	12140	0	-12.891	-13.849	16	0	0	0	0	0	0	0	33.8645	13.13	5.84	1.33	3.98	1.86	4.91	5.97	10.21	2.12	2.12	12.47	1.59	1.33	2.52	7.56	6.63	4.11	2.25	1.19	8.89
ENSMUSG00000007836	ENSMUST00000007980	Hnrnpa0	0.753896	0.467283	0.286613	0.564424	0.48156	0.0828639	-0.203749	0.0142769	243	81	918	71	1517	40	2678	1.701	-31.251	-23.125	1	0	0	4	0	1	4	0	67.1053	8.52	5.25	2.95	3.93	0.98	4.26	3.28	27.54	2.95	1.97	3.28	5.9	0.98	4.92	2.3	7.54	1.97	0.33	4.59	6.56
ENSMUSG00000007837	ENSMUST00000210500	Prrg2	0.344539	0.556013	-0.211474	0.698742	0.364605	0.334138	0.545612	-0.191408	138	59	570	59	214	62	7694	0	-11.447	5.571	7	0	0	0	0	0	0	0	42.0213	6.35	10.58	2.65	2.65	2.12	8.47	4.23	8.99	2.65	2.12	14.29	0.53	1.06	2.65	8.99	6.35	5.29	2.12	4.23	3.7
ENSMUSG00000007850	ENSMUST00000069304	Hnrnph1	0.748568	0.415779	0.332789	0.661309	0.395129	0.26618	-0.0666086	-0.02065	124	58	1350	46	751	35	8809	2.747	1.263	-8.487	14	1	2	3	0	0	0	0	25.2232	6.68	6.9	4.23	5.35	1.11	6.9	4.01	14.7	2.67	3.34	4.9	3.56	3.34	5.57	3.79	8.24	3.34	0.45	5.35	5.57
ENSMUSG00000007867	ENSMUST00000054565	Ift43									24	66	588	55	161	36	79896	0	-5.114	10.064	8	0	1	1	0	0	0	0	38.1443	5.64	7.18	3.59	11.79	0	8.72	5.13	5.13	2.05	2.56	10.77	4.1	3.59	1.03	6.15	7.69	4.62	2.05	2.56	5.64
ENSMUSG00000007872	ENSMUST00000008016	Id3	0.884618	0.869558	0.0150602	0.886048	0.851454	0.0345936	0.0195334	-0.0181031	382	53	360	62	536	50	1896	0	-12.298	8.035	3	1	0	0	0	0	0	1.85	44.9153	5.88	7.56	0.84	5.04	4.2	7.56	4.2	5.88	2.52	5.04	13.45	3.36	1.68	0.84	10.08	8.4	3.36	0	2.52	7.56
ENSMUSG00000007877	ENSMUST00000008021	Tcap	1	1	0	1	1	0	0	0	36	49	504	63	408	59	1143	0	-13.699	5.281	2	0	0	0	0	0	0	0	49.3976	5.39	9.58	0.6	1.8	2.4	12.57	9.58	5.99	1.8	2.4	11.38	2.99	1.8	1.2	7.19	6.59	6.59	1.8	1.8	6.59
ENSMUSG00000007880	ENSMUST00000008024	Arid1a	0.542159	0.288862	0.253297	0.677548	0.554997	0.122551	-0.130746	0.266135	387	54	5709	55	390	44	76829	4.71	-3.073	0.354	20	0	0	1	0	0	0	0	39.8738	6.31	4.1	4.1	3.84	0.79	4.52	10.25	8.73	2	2.68	6.52	3.52	4.52	1.95	12.83	10.62	5.1	0.63	3.63	3.36
ENSMUSG00000007891	ENSMUST00000151120	Ctsd	0.650449	0.272216	0.378233	0.528119	0.250186	0.277933	-0.1003	-0.0220305	234	68	1233	52	660	56	12128	0	-4.473	-2.255	9	0	0	0	0	0	0	0	35.9413	3.41	2.2	3.66	5.12	1.95	4.39	3.66	10.24	1.95	6.83	10	7.07	2.44	3.66	5.61	8.29	5.37	0.98	4.88	8.29
ENSMUSG00000007892	ENSMUST00000008036	Rplp1	-0.0559231	-0.144474	0.0885504	-0.119344	-0.170965	0.0516215	-0.0369289	-0.0264917	114	62	345	57	40	37	1259	0	-9.549	-2.545	3	0	0	0	0	0	0	0	33.6283	20.18	0	3.51	5.26	1.75	10.53	0	9.65	0.88	5.26	7.02	6.14	1.75	3.51	6.14	7.02	2.63	0.88	0.88	7.02
ENSMUSG00000007946	ENSMUST00000008090	Phox2a									185	75	843	68	581	51	4414	0	-17.477	-0.371	3	0	1	2	0	0	0	0	56.2724	13.93	5.71	1.43	3.57	2.14	5.36	3.57	10.36	1.43	1.07	8.21	5.36	0.71	4.29	12.14	9.64	4.29	1.07	3.21	2.5
ENSMUSG00000007950	ENSMUST00000008094	Abhd8	0.835454	0.281575	0.55388	0.750194	0.5446	0.205593	-0.348286	0.263026	180	72	1320	61	478	60	6951	0.552	-12.083	-12.255	5	0	0	0	0	0	0	6.1	42.6941	8.43	6.15	2.28	3.64	2.51	8.2	2.73	8.43	3.19	3.19	10.25	4.33	2.51	4.33	9.34	4.78	4.56	0.91	2.28	7.97
ENSMUSG00000007987	ENSMUST00000200157	Ift22	0.578792	-0.587485	1.16628	-0.0595837	0.370498	-0.430081	-1.59636	0.957982	82	68	558	51	2431	50	7255	0	-1.735	-11.096	5	0	1	1	0	0	0	0	36.9565	3.78	2.7	4.86	4.32	3.24	10.27	2.7	6.49	3.78	5.95	9.73	6.49	3.24	4.86	4.86	9.19	3.78	1.62	1.62	6.49
ENSMUSG00000007989	ENSMUST00000131309	Fzd3	0.357837	-1.29565	1.65349						463	52	2001	45	10270	38	70015	0	1.313	-2.255	7	0	1	20	0	0	0	23.71	24.0602	5.41	6.76	2.7	4.35	3.6	4.95	3	5.41	2.85	6.46	10.36	2.85	3.75	5.71	5.71	8.26	5.26	1.95	4.2	6.46
ENSMUSG00000008028	ENSMUST00000107933	1700008O03Rik									179	56	591	61	143	60	14988	0	-11.387	-2.98	6	0	1	0	0	0	0	0	44.1026	6.12	10.71	2.04	5.1	2.04	10.2	3.06	6.12	2.04	3.06	13.78	2.04	3.57	2.04	6.12	9.18	4.59	0.51	2.55	5.1
ENSMUSG00000008035	ENSMUST00000115524	Mid1ip1	0.937831	0.829532	0.108299	0.969475	0.844787	0.124688	0.0163885	0.0152553	561	61	549	59	912	50	2301	0	-8.942	4.846	2	0	0	2	0	0	0	2.73	51.9337	4.95	4.4	5.49	4.95	1.1	8.24	3.85	7.14	4.4	4.4	9.34	3.85	3.3	3.3	6.04	10.44	4.4	1.65	2.75	6.04
ENSMUSG00000008036	ENSMUST00000086112	Ap2s1	0.807325	0.482842	0.324483	0.696079	0.556207	0.139872	-0.18461	0.0733643	126	67	429	52	281	65	10885	0	-2.849	-10.081	5	0	0	0	0	0	0	0	41.1348	5.63	5.63	7.04	5.63	2.11	8.45	4.23	2.11	2.82	6.34	10.56	6.34	2.82	7.75	0	1.41	4.23	0.7	5.63	10.56
ENSMUSG00000008090	ENSMUST00000013633	Fgfrl1	0.813361	0.828107	-0.0147459	0.813328	0.777168	0.0361604	0.0509063	-0.050939	188	73	1590	57	551	49	12395	0	-10.405	-8.052	7	0	0	2	0	0	0	0	37.6894	6.62	6.62	2.46	4.35	2.46	3.21	3.59	9.64	2.65	3.59	8.51	5.67	2.08	1.7	9.07	8.88	7.37	1.89	1.89	7.75
ENSMUSG00000008129	ENSMUST00000118856	4930432K21Rik	0.761561	0.752104	0.00945723	0.884473	0.76055	0.123923	0.114466	0.00844692	260	56	1803	55	303	54	24432	0	-4.316	7.89	9	0	0	0	0	0	0	3.22	36.7279	8.33	4.83	1.67	6.83	1.33	8.5	6.17	7	2.33	2	8.67	4	2.33	1.5	8.83	12.33	6.83	1.17	0.83	4.5
ENSMUSG00000008136	ENSMUST00000008280	Fhl2	0.952195	0.656481	0.295714	0.759937	0.0835119	0.676425	0.380712	-0.572969	283	69	840	52	440	39	40888	0.988	-3.607	-6.458	6	0	0	1	0	0	0	0	39.5683	3.23	3.94	3.23	4.66	12.54	8.24	4.66	6.45	3.23	3.58	5.73	9.32	1.08	5.02	4.3	5.73	6.45	1.43	4.66	2.51
ENSMUSG00000008136	ENSMUST00000008280	Fhl2	0.952195	0.656481	0.295714	0.759937	0.0835119	0.676425	0.380712	-0.572969	283	69	840	52	440	39	40888	0.988	-3.607	-6.458	6	0	0	1	0	0	0	0	39.5683	3.23	3.94	3.23	4.66	12.54	8.24	4.66	6.45	3.23	3.58	5.73	9.32	1.08	5.02	4.3	5.73	6.45	1.43	4.66	2.51
ENSMUSG00000008136	ENSMUST00000185893	Fhl2	0.952195	0.656481	0.295714	0.759937	0.0835119	0.676425	0.380712	-0.572969	357	51	840	52	224	50	73695	0.988	-3.607	7.165	6	2	0	0	0	0	0	10.98	39.5683	3.23	3.94	3.23	4.66	12.54	8.24	4.66	6.45	3.23	3.58	5.73	9.32	1.08	5.02	4.3	5.73	6.45	1.43	4.66	2.51
ENSMUSG00000008136	ENSMUST00000185893	Fhl2	0.952195	0.656481	0.295714	0.759937	0.0835119	0.676425	0.380712	-0.572969	357	51	840	52	224	50	73695	0.988	-3.607	7.165	6	2	0	0	0	0	0	10.98	39.5683	3.23	3.94	3.23	4.66	12.54	8.24	4.66	6.45	3.23	3.58	5.73	9.32	1.08	5.02	4.3	5.73	6.45	1.43	4.66	2.51
ENSMUSG00000008140	ENSMUST00000239015	Emc10	0.53946	-0.0327648	0.572225	0.500894	0.299014	0.20188	-0.370345	0.331779	114	70	807	63	934	55	6576	0.833	-17.743	-3.704	7	0	0	0	0	0	0	0	41.9476	10.45	7.84	2.24	3.73	1.49	6.72	4.85	13.81	1.49	1.12	10.82	1.87	2.61	3.36	4.48	8.21	3.73	0.75	1.49	8.96
ENSMUSG00000008153	ENSMUST00000008297	Clstn3	0.638492	-0.309295	0.947787	0.691486	0.366783	0.324703	-0.623085	0.676078	310	58	2871	56	833	55	34036	0	-6.241	-8.777	18	0	0	0	0	0	1	5.25	40.4188	7.22	4.71	3.77	5.75	2.41	7.64	3.77	7.43	3.66	4.71	9.83	3.87	1.57	3.24	5.65	7.53	5.54	1.36	3.45	6.9
ENSMUSG00000008167	ENSMUST00000095220	Fbxw9	0.412615	-0.433494	0.846109	0.502707	-0.162002	0.664709	-0.1814	0.271492	73	64	1377	59	457	51	7067	0	-11.136	-20.226	10	0	0	0	0	0	0	0	39.6061	8.52	7.64	2.18	7.21	2.84	4.37	4.59	6.77	3.28	2.62	12.88	3.06	0.87	1.97	5.24	8.3	4.37	2.18	2.18	8.95
ENSMUSG00000008193	ENSMUST00000035323	Spib	0.722332	0.462682	0.25965	0.603656	-0.292563	0.896219	0.636569	-0.755245	18	60	804	60	1966	51	6079	0.814	-9.152	11.948	6	0	0	0	0	0	0	0	44.7368	10.11	5.24	1.12	5.62	1.5	6.74	4.12	7.87	1.87	1.12	11.99	4.49	1.87	3.37	8.99	9.36	4.12	1.87	4.87	3.75
ENSMUSG00000008200	ENSMUST00000013759	Fnbp4	0.685764	0.0673911	0.618373	0.734589	0.0210158	0.713574	0.0952002	-0.0463754	87	59	3234	51	1370	37	35652	3.515	-1.9	-9.936	17	0	0	5	0	0	0	3.93	28.8104	10.03	4.64	2.69	4.64	1.11	10.77	5.01	5.2	0.93	2.6	6.13	5.66	2.14	1.21	11.42	10.21	6.96	1.39	1.49	5.76
ENSMUSG00000008206	ENSMUST00000008350	Cers4	0.74568	0.505333	0.240348	0.695922	0.476026	0.219896	-0.020452	-0.0293066	393	63	1182	53	7900	40	38482	1.567	-5.845	-4.864	11	0	0	13	0	0	0	0	29.8469	5.09	6.87	2.8	3.82	2.8	4.83	3.56	4.83	3.05	4.07	13.49	3.31	2.29	7.38	4.83	6.87	4.07	3.31	4.58	8.14
ENSMUSG00000008226	ENSMUST00000112050	Scrn3	0.494728	0.454488	0.0402395	0.522911	0.499402	0.0235088	-0.0167307	0.0449134	62	72	570	45	1265	43	8143	0	0.902	-14.574	4	0	1	2	0	0	0	0	22.3404	9.52	4.76	4.76	5.82	2.65	10.58	2.65	8.47	1.06	4.23	8.99	4.23	1.59	3.17	3.17	4.76	3.17	2.65	4.76	8.99
ENSMUSG00000008226	ENSMUST00000112050	Scrn3	0.494728	0.454488	0.0402395	0.522911	0.499402	0.0235088	-0.0167307	0.0449134	62	72	570	45	1265	43	8143	0	0.902	-14.574	4	0	1	2	0	0	0	0	22.3404	9.52	4.76	4.76	5.82	2.65	10.58	2.65	8.47	1.06	4.23	8.99	4.23	1.59	3.17	3.17	4.76	3.17	2.65	4.76	8.99
ENSMUSG00000008226	ENSMUST00000090811	Scrn3	0.494728	0.454488	0.0402395	0.522911	0.499402	0.0235088	-0.0167307	0.0449134	115	65	1257	43	1937	37	25218	0	4.814	-14.574	8	0	2	9	0	0	0	0	25.1799	6.7	5.26	3.83	5.74	1.67	9.33	3.11	5.5	2.39	5.98	7.89	6.94	2.87	3.59	5.74	6.46	5.02	1.67	4.07	6.22
ENSMUSG00000008226	ENSMUST00000090811	Scrn3	0.494728	0.454488	0.0402395	0.522911	0.499402	0.0235088	-0.0167307	0.0449134	115	65	1257	43	1937	37	25218	0	4.814	-14.574	8	0	2	9	0	0	0	0	25.1799	6.7	5.26	3.83	5.74	1.67	9.33	3.11	5.5	2.39	5.98	7.89	6.94	2.87	3.59	5.74	6.46	5.02	1.67	4.07	6.22
ENSMUSG00000008301	ENSMUST00000130163	Phax	0.990098	0.820945	0.169153	0.960197	0.816454	0.143743	-0.0254106	-0.0044904	251	62	1092	47	43	33	24747	0	2.449	-0.226	5	0	0	0	0	0	0	0	34.8066	6.89	5.79	4.96	7.16	0.83	10.47	4.96	7.16	1.65	4.13	8.54	10.19	1.93	2.48	4.41	5.79	4.68	0.55	2.48	4.96
ENSMUSG00000008305	ENSMUST00000030095	Tle1	0.880994	0.543681	0.337313	0.855261	0.813801	0.0414603	-0.295853	0.27012	147	70	2343	53	79	30	81948	0	-3.106	-11.965	20	0	0	2	0	0	0	0	34.9166	8.21	3.97	3.59	5.64	2.05	4.1	4.74	7.82	3.97	4.1	8.33	5.38	2.05	2.31	8.97	10.13	5.13	1.03	2.56	5.9
ENSMUSG00000008307	ENSMUST00000008451	1700109H08Rik	0.0611963	0.229409	-0.168213	-0.582904	-0.638024	0.0551197	0.223332	-0.867432	80	48	633	39	60	35	12684	0	4.513	5.281	6	0	2	0	0	0	0	1.55	22.0096	4.29	3.33	5.24	7.14	2.86	9.52	1.9	6.67	0.95	3.81	10	9.52	4.29	10	2.86	4.76	2.38	0.48	2.86	7.14
ENSMUSG00000008318	ENSMUST00000008462	Relt	0.658131	0.660391	-0.0022597	0.831932	0.656429	0.175503	0.177763	-0.00396198	157	76	1311	58	1383	53	17600	0	-10.55	-13.125	11	0	0	2	0	0	0	0	37.4713	8.03	5.73	2.29	2.06	4.36	6.19	4.36	9.63	3.21	3.21	10.09	4.13	1.15	1.15	11.7	7.8	6.65	1.61	1.61	5.05
ENSMUSG00000008333	ENSMUST00000008477	Snrpb2	0.871325	0.697796	0.173529	0.770955	0.529772	0.241183	0.0676543	-0.168024	85	58	678	40	1298	36	9815	0.278	7.937	4.846	7	0	2	3	0	0	0	0	25.4464	10.22	4	6.67	4.44	0	5.33	5.33	6.22	1.78	5.78	6.22	11.11	4.89	6.22	6.22	3.56	5.33	0	3.11	3.56
ENSMUSG00000008348	ENSMUST00000136312	Ubc	0.962826	0.882621	0.0802041	0.926449	0.870745	0.0557036	-0.0245005	-0.0118764	321	63	2205	55	92	34	4050	0.001	-2.236	1.223	2	0	0	0	0	0	0	0	50.2046	2.59	5.18	2.45	6.4	0.27	7.63	7.63	7.49	1.23	8.86	11.44	9.54	1.36	2.72	4.09	4.22	9.81	0.14	1.23	5.72
ENSMUSG00000008373	ENSMUST00000008517	Prpf31	0.811429	0.310085	0.501344	0.734716	0.247152	0.487564	-0.0137801	-0.0629334	80	50	1500	53	1564	47	12502	2.418	-3.897	-0.806	14	0	0	1	0	0	0	0	41.9679	8.42	5.41	3.81	4.21	0.8	10.82	4.61	6.41	1.2	5.61	9.02	7.82	3.01	2.4	3.61	8.62	5.01	0.4	2.81	6.01
ENSMUSG00000008384	ENSMUST00000008528	Sertad1	0.938542	0.899929	0.0386129	0.849666	0.87817	-0.0285035	-0.0671163	-0.0217598	172	59	711	62	350	50	3407	0	-13.437	-1.386	2	0	0	0	0	0	0	2.46	45.1064	8.47	3.81	2.12	7.63	0.85	9.32	3.39	7.2	2.12	2.54	15.25	2.54	2.54	0.85	11.86	9.75	2.97	0.85	0.85	5.08
ENSMUSG00000008393	ENSMUST00000008537	Carhsp1	0.771175	0.447168	0.324007	0.638075	0.266255	0.37182	0.0478131	-0.180913	50	64	447	59	2361	50	13576	0	-8.002	-13.849	4	0	0	1	0	0	0	0	41.4966	3.38	6.08	2.03	4.05	2.7	5.41	2.7	8.11	4.05	4.05	5.41	4.73	1.35	2.7	13.51	8.78	8.78	0.68	2.03	9.46
ENSMUSG00000008398	ENSMUST00000151153	Elk3	0.677108	0.463792	0.213316	0.644597	0.549796	0.0948009	-0.118515	0.0860039	220	53	429	55	687	36	61647	1.521	-2.327	2.817	4	0	0	3	0	0	0	0	38.2979	5.63	3.52	4.23	3.52	0.7	3.52	3.52	3.52	3.52	2.11	19.01	6.34	2.11	4.23	9.86	11.97	4.23	2.82	2.82	2.82
ENSMUSG00000008429	ENSMUST00000008573	Herpud2	0.81801	0.637148	0.180862	0.796598	0.792693	0.0039055	-0.176956	0.155544	854	72	1215	48	712	31	43689	0	1.892	-2.835	8	0	1	2	0	0	0	4.9	25.3102	8.66	3.47	5.2	5.2	0.5	5.2	8.17	5.94	2.97	2.48	9.16	2.23	3.47	3.22	7.92	11.14	4.21	1.73	3.47	5.69
ENSMUSG00000008435	ENSMUST00000008579	Rdh13	0.620351	0.1908	0.429551	0.685237	0.330262	0.354975	-0.0745765	0.139462	138	64	1005	55	1891	45	19983	0	-5.017	-15.299	7	0	0	4	0	0	0	0	37.8378	10.48	6.29	3.59	3.59	1.5	6.89	2.1	8.68	2.99	3.89	11.38	5.99	2.4	3.89	4.19	5.99	5.39	1.2	1.8	7.78
ENSMUSG00000008438	ENSMUST00000008582	Adam21	1	0.881361	0.118639						508	43	2190	44	213	34	9891	0	1.333	1.948	2	2	1	1	0	0	0	5.74	21.978	4.53	3.7	4.66	3.84	6.58	5.35	3.57	8.5	4.12	4.39	9.33	5.08	2.47	3.84	4.94	7.41	4.94	1.37	3.7	7.68
ENSMUSG00000008450	ENSMUST00000008594	Nutf2	0.721763	0.334525	0.387238	0.44937	0.216664	0.232706	-0.154532	-0.117861	152	69	384	47	412	44	18751	0.714	1.951	-8.777	5	0	1	0	0	0	0	0	36.5079	6.3	1.57	3.94	7.87	2.36	3.15	10.24	6.3	3.94	9.45	7.87	4.72	3.94	6.3	3.94	6.3	3.94	2.36	2.36	3.15
ENSMUSG00000008461	ENSMUST00000008605	Fut1	1	-0.24784	1.24784						144	54	1134	53	1302	49	3454	0	-5.139	-1.965	2	0	0	5	0	0	0	2.12	31.117	6.63	5.31	3.71	4.51	2.12	3.98	4.51	8.22	4.24	3.18	12.47	2.12	2.39	7.16	6.63	6.63	5.31	2.92	2.12	5.84
ENSMUSG00000008475	ENSMUST00000077755	Arpc5	0.903606	0.768009	0.135597	0.494526	0.415753	0.0787729	-0.056824	-0.352256	183	71	456	53	1275	39	9056	0.446	-6.425	-13.994	4	0	1	3	0	0	0	3.57	41.3333	9.93	3.97	5.3	8.61	0.66	5.96	3.97	7.95	0.66	3.97	7.95	9.27	1.99	2.65	2.65	8.61	3.31	0.66	1.99	9.93
ENSMUSG00000008482	ENSMUST00000008626	Rnf151	1	1	0						78	51	720	57	397	47	2225	0	-6.437	-3.704	4	0	0	0	0	0	0	0	40.3361	5.44	9.21	4.6	3.77	7.53	6.28	7.11	6.28	5.02	2.09	12.55	4.6	1.67	2.51	4.18	3.77	5.44	0.84	0.84	6.28
ENSMUSG00000008496	ENSMUST00000108415	Pou2f2	-0.0551476	-0.0320768	-0.0230708	0.455597	0.711322	-0.255725	-0.232654	0.743398	36	69	1440	61	5619	50	45145	0.818	-4.037	-7.472	14	0	0	7	0	0	2	0	48.7448	7.1	3.76	3.97	2.71	0.84	4.8	7.93	7.52	2.71	2.71	11.48	4.38	2.09	2.71	13.78	10.65	6.68	0.84	0.63	2.71
ENSMUSG00000008540	ENSMUST00000120230	Mgst1									378	44	468	49	181	31	15190	0	-1.061	-0.806	4	0	0	0	0	0	0	20.16	35.7143	9.03	7.74	4.52	3.87	0.65	3.87	1.94	6.45	1.94	5.16	12.9	3.87	5.16	7.1	3.87	5.16	6.45	0	4.52	5.81
ENSMUSG00000008575	ENSMUST00000050872	Nfib	1	-17.297	18.297						548	53	1713	49	6509	38	215136	0	4.181	1.078	12	1	2	16	0	0	0	6.55	27.5923	4.56	5.09	3.68	4.56	1.23	4.56	5.26	4.74	3.51	4.39	7.37	5.26	1.93	3.33	11.93	11.05	7.54	1.23	3.16	5.61
ENSMUSG00000008590	ENSMUST00000008734	Htr3b									205	59	1314	50	892	39	29983	0	-1.515	-3.849	9	0	0	3	0	0	0	3.85	28.211	5.03	6.41	4.35	5.49	2.29	5.03	4.58	3.2	2.29	5.95	13.27	2.29	1.6	5.03	4.35	8.92	4.58	2.52	3.66	9.15
ENSMUSG00000008604	ENSMUST00000008748	Ubqln4	0.584234	0.141023	0.44321	0.7301	0.47375	0.25635	-0.18686	0.332726	47	84	1791	58	1492	49	15968	0.8	-6.174	-39.501	11	0	0	0	0	0	0	0	43.3613	8.72	3.86	6.04	2.68	0.34	5.37	10.23	7.89	0.84	4.03	9.4	1.85	6.04	2.68	9.4	10.91	5.2	0.17	0.5	3.86
ENSMUSG00000008668	ENSMUST00000008812	Rps18	0.0829475	0.0514972	0.0314503	0.157043	0.126992	0.0300509	-0.00139944	0.075495	57	67	459	53	44	33	3679	0.658	-7.698	1.078	5	0	0	0	0	0	0	0	45.0331	5.26	13.16	3.95	5.92	0	4.61	3.95	7.89	3.29	7.24	9.21	10.53	1.32	2.63	1.97	1.97	5.92	1.32	1.97	7.89
ENSMUSG00000008682	ENSMUST00000008826	Rpl10	0.304809	0.375183	-0.0703739	0.323931	0.210943	0.112988	0.183362	-0.16424	86	57	645	50	68	36	2324	0.343	-4.785	-8.197	7	0	0	0	0	0	0	0	33.8028	7.48	10.28	2.8	4.67	3.74	4.67	2.8	7.94	3.74	6.54	5.61	10.75	3.27	5.14	5.14	4.21	1.87	0.93	2.8	5.61
ENSMUSG00000008683	ENSMUST00000131374	Rps15a	0.348306	0.2638	0.0845058	0.133462	0.0744504	0.0590118	-0.025494	-0.18935	58	59	393	44	4728	44	11817	0.442	-0.476	-3.27	5	0	0	10	0	0	0	0	28.6822	4.62	8.46	5.38	4.62	1.54	4.62	3.08	8.46	3.08	8.46	9.23	8.46	3.85	6.15	2.31	3.85	3.85	0.77	0.77	8.46
ENSMUSG00000008690	ENSMUST00000074552	Ncaph2	0.629758	0.0189479	0.61081	0.652778	0.323138	0.32964	-0.28117	0.30419	100	61	1824	55	1375	53	17091	0.345	-6.341	-11.82	20	0	0	3	0	0	0	0	40.099	7.74	6.1	2.31	6.92	1.48	11.37	6.43	4.28	1.32	3.13	10.05	4.45	2.64	3.29	8.4	6.43	3.62	1.32	2.8	5.93
ENSMUSG00000008730	ENSMUST00000106845	Hipk1	0.597782	0.425772	0.17201	0.395328	0.364723	0.0306052	-0.141405	-0.0610489	83	74	3498	50	386	47	47514	2.716	0.86	-11.241	15	0	2	0	0	0	0	0	31.4433	8.5	3.35	3.69	3.26	1.46	3.52	7.64	5.06	3.26	4.21	9.27	4.12	1.55	2.58	7.47	13.05	7.38	0.69	3.52	6.44
ENSMUSG00000008734	ENSMUST00000008878	Gprc5b	0.745406	0.810821	-0.0654147	0.594917	0.675472	-0.0805552	-0.0151405	-0.135349	173	78	1233	57	3112	49	23165	0	-8.448	-22.4	4	0	0	3	0	0	1	5.15	35.9413	8.54	5.37	2.68	3.17	2.2	3.9	3.17	5.37	2.2	5.37	15.12	2.93	3.66	5.85	5.61	7.07	5.85	2.68	1.95	7.32
ENSMUSG00000008763	ENSMUST00000196250	Man1a2	0.593277	0.69255	-0.0992727	0.603277	0.668309	-0.0650319	0.0342408	-0.0242412	263	40	369	51	112	40	40564	0.913	-1.068	14.701	3	0	0	0	0	0	0	0	28.9256	5.74	5.74	1.64	4.92	2.46	2.46	0	9.84	8.2	4.92	15.57	4.92	0.82	8.2	9.84	6.56	4.1	0	1.64	2.46
ENSMUSG00000008822	ENSMUST00000065913	Acyp1	0.924441	0.324179	0.600263	0.733815	0.529951	0.203863	-0.396399	0.205772	117	61	327	52	4	25	1526	0	-4.404	-8.922	3	0	0	0	0	0	0	0	33.6449	7.41	4.63	0.93	4.63	3.7	4.63	5.56	5.56	3.7	4.63	11.11	3.7	0.93	2.78	4.63	9.26	6.48	1.85	2.78	11.11
ENSMUSG00000008845	ENSMUST00000032234	Cd163	0.713173	0.405385	0.307788						84	42	3366	49	954	38	25872	2.236	-3.411	4.991	17	0	1	1	0	0	0	0	24.2857	6.16	4.19	3.39	5.53	6.6	5.98	3.93	11.78	3.84	3.93	7.85	4.73	1.43	1.78	2.85	9.37	4.82	3.75	0.71	7.4
ENSMUSG00000008855	ENSMUST00000107151	Hdac5	0.679336	-0.0223523	0.701689	0.74567	0.286529	0.459141	-0.242548	0.308881	362	68	3093	60	1397	51	35735	1.927	-11.628	-2.69	25	0	0	1	0	0	0	0	47.036	7.67	4.17	2.14	3.01	1.17	8.74	8.93	8.06	3.11	2.72	11.07	4.37	2.04	2.33	7.67	9.22	5.63	0.49	1.17	6.31
ENSMUSG00000008859	ENSMUST00000009003	Rala	0.823986	0.490987	0.332999	0.803549	0.398201	0.405348	0.0723493	-0.0927861	259	72	621	44	1808	38	63669	1.585	2.887	2.672	5	0	1	8	0	0	0	0	35.6098	8.25	7.28	4.85	7.77	1.46	9.71	3.4	5.34	0.49	4.37	6.8	10.19	2.91	4.85	1.46	5.83	3.4	0.49	2.91	8.25
ENSMUSG00000008892	ENSMUST00000009036	Vdac3	0.925979	0.58412	0.341858	0.904478	0.515339	0.38914	0.0472812	-0.0687813	77	64	852	43	425	40	16673	0	1.706	-5.733	9	0	0	1	0	0	0	0	27.6596	7.77	2.12	7.07	4.95	2.12	3.89	2.12	11.31	1.41	3.89	9.54	9.19	1.06	5.3	1.41	7.42	9.19	1.77	4.24	4.24
ENSMUSG00000008932	ENSMUST00000106713	Slc1a7	0.29464	0.600722	-0.306082	0.797828	0.366782	0.431046	0.737129	-0.23394	244	57	1680	57	1083	49	45201	0	-6.129	-10.951	11	0	0	2	0	0	0	8.37	37.8136	9.48	3.58	3.04	4.11	1.97	4.47	3.4	7.33	1.43	8.59	11.99	3.76	3.4	3.94	5.01	5.9	6.62	0.54	1.97	9.48
ENSMUSG00000008958	ENSMUST00000009102	Vps72	0.73492	0.158239	0.576681	0.828221	0.366681	0.46154	-0.115142	0.208443	76	68	1107	57	273	48	12030	0.619	-5.51	-22.98	6	0	0	1	0	0	0	0	44.9591	8.42	8.7	0.82	5.98	1.09	10.6	3.8	7.07	2.17	2.99	7.07	6.52	0.54	2.45	10.05	6.52	7.61	0.27	2.72	4.62
ENSMUSG00000008976	ENSMUST00000009120	Gabpa	0.809321	0.487958	0.321363	0.523516	0.405147	0.118369	-0.202995	-0.0828105	446	64	1365	45	3176	35	28656	0	4.071	1.803	10	0	2	9	0	0	0	1.82	28.4768	7.05	4.63	3.08	5.95	1.98	9.69	7.05	4.63	1.98	7.71	9.47	5.95	1.76	1.76	4.19	5.51	6.39	1.76	2.42	7.05
ENSMUSG00000008999	ENSMUST00000009143	Bmp7	0.458967	0.409676	0.0492912	-0.0186233	-0.523328	0.504705	0.455414	-0.933004	252	73	1293	59	2125	50	72310	0	-7.287	-36.023	7	0	0	4	0	0	0	2.91	48.4848	7.91	6.98	4.65	4.88	1.63	6.05	4.88	4.65	4.88	4.19	9.07	3.72	2.56	5.81	5.35	8.37	3.72	1.4	3.26	6.05
ENSMUSG00000009013	ENSMUST00000112090	Dynll1	0.933983	0.653776	0.280207	0.835604	0.583619	0.251986	-0.0282212	-0.070157	268	73	270	47	191	39	2408	0	-2.836	-5.443	2	0	0	0	0	0	0	0	38.6364	7.87	2.25	4.49	5.62	3.37	7.87	4.49	4.49	4.49	7.87	4.49	11.24	3.37	5.62	1.12	4.49	4.49	1.12	5.62	5.62
ENSMUSG00000009030	ENSMUST00000009174	Pdcl	0.932011	0.720575	0.211436	0.645345	0.596664	0.0486801	-0.162756	-0.123911	195	58	906	48	1757	34	9259	2.747	0.58	1.078	4	0	1	7	0	0	0	0	35	4.98	5.65	2.33	7.31	1.99	12.29	5.98	6.64	1.66	4.98	9.3	7.31	3.32	4.65	2.99	6.64	4.98	0.33	2.33	4.32
ENSMUSG00000009035	ENSMUST00000228002	Tmem184b	0.462558	0.0922296	0.370328	0.611017	0.528054	0.0829625	-0.287366	0.435825	130	71	1245	57	1940	56	42553	0	-3.208	-18.342	10	0	0	2	0	0	0	0	40.4358	8.7	4.11	1.93	3.62	2.9	3.86	3.62	5.8	2.17	6.04	9.66	3.38	2.9	6.76	4.59	9.18	7	1.21	6.28	6.28
ENSMUSG00000009073	ENSMUST00000053079	Nf2	0.354741	0.18578	0.168961	0.421935	0.416375	0.00555995	-0.163401	0.230594	380	69	1776	49	314	43	77032	0.611	1.104	-22.835	17	0	2	2	0	0	0	0	41.8644	8.46	7.11	2.54	5.25	0.85	12.69	5.25	2.54	1.69	5.08	10.32	9.98	4.06	3.55	4.23	4.4	4.57	1.02	2.54	3.89
ENSMUSG00000009076	ENSMUST00000009220	Zmat5	0.825861	0.311632	0.514229	0.765702	0.555821	0.209882	-0.304347	0.244189	71	59	513	58	208	53	32992	0	-8.874	-2.255	6	0	0	0	0	0	0	0	44.9704	5.88	8.82	2.94	5.29	2.94	8.24	5.88	5.29	2.94	1.18	10.59	6.47	2.35	4.12	7.65	7.06	2.35	3.53	2.35	4.12
ENSMUSG00000009079	ENSMUST00000079949	Ewsr1	0.566669	0.0740347	0.492634	0.607852	0.221356	0.386496	-0.106138	0.147321	245	63	1968	55	375	28	29578	1.906	-5.019	11.948	17	0	1	3	0	0	0	0	35.0153	5.5	6.87	2.75	4.89	0.76	2.29	9.01	20	0.61	0.61	2.44	2.75	3.05	2.29	11.45	8.85	6.87	0.46	6.41	2.14
ENSMUSG00000009090	ENSMUST00000109897	Ap1b1	0.570451	-0.0285242	0.598975	0.688322	0.360532	0.32779	-0.271185	0.389057	254	67	2751	53	937	52	55906	2.904	-2.783	7.02	21	0	0	1	0	0	0	0	37.7049	9.06	3.38	4.59	6.22	1.64	6.55	4.26	4.26	0.98	5.35	12.45	6.77	2.51	3.06	5.57	6.44	5.13	0.66	2.95	8.19
ENSMUSG00000009092	ENSMUST00000009236	Derl3	-0.367228	-0.543761	0.176533	0.301473	0.29852	0.00295276	-0.17358	0.842281	12	33	687	58	622	54	2529	0	-7.406	2.542	7	0	0	2	0	0	0	0	37.8855	6.14	5.26	2.63	3.07	0.88	3.51	4.39	8.33	1.32	1.32	18.86	1.75	3.51	12.72	6.58	3.51	3.95	1.32	3.07	7.89
ENSMUSG00000009093	ENSMUST00000160211	Gstt4									120	59	723	49	121	42	7601	0	-1.602	-10.226	5	0	0	0	0	0	0	0	34.728	5.42	5	2.5	5.42	1.67	7.08	3.33	3.75	3.75	7.08	12.08	7.5	5	5.83	5.42	5.83	2.92	2.5	2.5	5.42
ENSMUSG00000009112	ENSMUST00000009256	Bcl2l13	0.765128	0.493291	0.271837	0.698278	0.43284	0.265437	-0.00639951	-0.0604509	169	62	1305	54	5451	47	56605	1.484	-6.447	2.528	7	0	1	11	0	0	0	0	37.1824	9.91	3	1.84	2.53	0.69	12.67	4.84	6.45	2.07	2.76	11.29	4.15	1.38	2.3	7.14	10.83	5.07	1.15	1.84	8.06
ENSMUSG00000009114	ENSMUST00000092406	2610028H24Rik	-4.06762	-7.19752	3.1299	-2.74363	-4.64863	1.905	-1.22491	2.54889	178	52	813	59	649	51	12015	0	-2.474	7.165	8	1	0	0	0	0	0	3.42	42.0074	11.85	5.93	1.11	3.7	0	4.44	10	2.96	5.56	2.96	8.89	2.22	6.3	1.48	14.07	6.67	5.56	1.48	1.11	3.7
ENSMUSG00000009145	ENSMUST00000077502	Dqx1	-0.0720415	-0.0372298	-0.0348117	0.245335	0.194762	0.0505725	0.0853841	0.231992	374	53	2157	56	726	45	9475	0	-6.979	-18.197	12	1	1	0	0	0	0	7.1	31.5202	9.33	5.85	2.09	4.87	2.92	8.5	4.74	5.85	1.67	2.79	14.07	2.09	1.53	3.06	8.5	8.08	4.18	1.25	2.51	6.13
ENSMUSG00000009185	ENSMUST00000009329	Ccl8									52	44	294	50	165	42	1615	0	-6.436	6.73	3	0	0	0	0	0	0	0	31.25	4.12	2.06	2.06	3.09	5.15	5.15	7.22	2.06	1.03	7.22	13.4	9.28	4.12	2.06	8.25	5.15	4.12	1.03	3.09	10.31
ENSMUSG00000009207	ENSMUST00000064503	Lnpk	0.528008	0.261003	0.267005	0.499408	0.169429	0.329978	0.062974	-0.091574	192	56	1278	43	1725	29	58615	0	4.203	9.919	13	1	2	10	0	0	0	2	19.5755	8	6.59	3.06	3.53	1.18	10.82	4.71	4.94	0.47	4.47	9.65	5.65	1.18	4.47	9.88	7.76	5.65	0.94	2.12	4.94
ENSMUSG00000009291	ENSMUST00000009435	Pttg1ip	0.868363	0.383216	0.485147	0.791815	0.3433	0.448515	-0.0366319	-0.0399162	102	63	525	55	1667	48	17013	1.983	-5.938	-7.038	6	0	0	2	0	0	0	0	35.2601	6.32	9.77	4.02	2.3	7.47	9.2	2.3	5.17	1.15	2.87	10.92	6.9	3.45	1.72	5.17	7.47	2.3	2.3	2.87	6.32
ENSMUSG00000009292	ENSMUST00000105401	Trpm2									299	56	4521	55	2454	48	62133	4.54	-5.854	-15.009	34	0	0	1	0	0	0	14.83	39.6013	5.78	5.84	3.05	4.85	1.86	6.64	4.91	5.91	2.99	5.78	11.29	5.64	2.32	4.91	4.65	5.84	5.51	2.26	2.66	7.3
ENSMUSG00000009293	ENSMUST00000174510	Ube2g2	0.851942	0.377566	0.474376	0.80974	0.353147	0.456593	-0.0177833	-0.0244186	99	77	498	52	1434	53	23719	0.653	-2.123	-16.603	6	0	0	2	0	0	0	1.83	35.3659	7.27	3.64	3.64	5.45	1.82	9.09	3.03	6.06	1.21	5.45	8.48	4.85	5.45	5.45	9.09	7.27	2.42	1.82	3.03	5.45
ENSMUSG00000009350	ENSMUST00000020779	Mpo	-0.444565	-0.466257	0.0216919	0.264351	0.515245	-0.250894	-0.272586	0.981503	497	53	2157	56	96	51	10833	0	-3.903	-2.11	14	0	0	0	0	0	0	2.81	41.841	6.69	8.36	6.69	4.46	2.23	3.9	4.87	5.85	1.11	4.18	11.84	3.9	2.65	4.6	7.52	5.57	5.99	1.53	2.51	5.57
ENSMUSG00000009376	ENSMUST00000115443	Met									512	69	4140	45	2157	37	110181	0	2.253	-3.994	22	0	4	5	0	0	0	8.06	26.27	4.35	3.84	5.29	4.79	2.97	5.22	3.63	6.09	3.41	5.51	10.08	5.51	1.6	4.57	5.29	9.06	6.31	0.8	3.26	8.41
ENSMUSG00000009378	ENSMUST00000009522	Slc16a12									362	62	1461	49	2228	36	78887	0	-1.319	12.672	7	0	1	4	0	0	0	7.82	23.9175	7.61	3.91	1.65	3.09	4.32	2.67	3.29	8.02	1.23	5.35	13.17	3.09	2.88	5.97	4.73	8.23	6.17	1.44	4.32	8.85
ENSMUSG00000009406	ENSMUST00000009550	Elk1	0.684983	0.520984	0.163999	0.508989	0.578787	-0.0697982	-0.233797	0.0578026	203	71	1290	57	2055	46	17214	0	-5.672	-15.154	6	0	0	3	0	0	0	5.01	35.0467	7.93	4.2	2.33	2.33	0.93	6.53	4.9	8.62	1.4	3.26	10.26	4.2	1.17	2.33	13.05	11.19	7.23	0.93	1.86	5.36
ENSMUSG00000009418	ENSMUST00000067414	Nav1	0.564803	-0.44777	1.01257	0.177689	0.501691	-0.324002	-1.33657	0.949461	385	60	5628	57	7104	44	151126	0	-3.908	-17.472	30	2	0	10	0	0	0	2.38	43.1163	6.88	4.96	2.99	5.28	0.75	6.67	3.36	6.61	2.08	3.04	10.24	7.25	2.24	1.97	7.84	14.83	5.92	0.91	1.55	4.64
ENSMUSG00000009470	ENSMUST00000109399	Tnpo1	0.469333	0.324041	0.145292	0.31679	0.181915	0.134875	-0.0104167	-0.142126	135	67	2673	45	5637	36	52022	5.41	2.257	-4.284	24	0	2	11	0	0	1	0	27.3341	6.18	3.93	4.72	6.97	2.92	7.19	5.62	3.82	2.25	7.42	12.92	4.94	2.92	3.93	5.51	5.28	4.04	1.35	2.47	5.62
ENSMUSG00000009535	ENSMUST00000009679	Rnmt	-0.248542	-0.206574	-0.0419683	0.327803	0.117024	0.210779	0.252747	0.323598	113	51	1398	42	3497	42	24498	0	2.885	1.368	11	0	1	4	0	0	1	3.9	26.0776	5.81	5.59	4.3	5.38	2.37	10.11	5.81	5.81	1.51	4.09	9.03	9.03	2.15	4.52	4.3	7.53	3.23	0.65	3.87	4.95
ENSMUSG00000009545	ENSMUST00000009689	Kcnq1									105	73	2007	57	917	53	319789	1.378	-5.261	-28.487	16	0	0	0	0	0	0	0	39.8801	6.89	7.19	2.1	4.04	1.2	4.04	4.34	7.04	2.1	6.14	9.28	5.39	1.8	4.79	6.59	8.53	5.69	1.65	2.99	8.23
ENSMUSG00000009549	ENSMUST00000110862	Srp14	0.855411	0.556385	0.299026	-0.107362	-0.363631	0.25627	-0.0427564	-0.920017	21	75	294	53	272	48	1071	0.792	-13.079	2.093	3	0	0	2	0	0	0	0	41.6667	2.06	10.31	1.03	2.06	3.09	6.19	3.09	5.15	0	3.09	15.46	10.31	1.03	6.19	5.15	11.34	6.19	2.06	1.03	5.15
ENSMUSG00000009551	ENSMUST00000009695	6330409D20Rik									256	46	489	47	374	52	8397	0	5.294	-3.414	3	0	0	0	0	0	0	9.51	25.4658	6.79	6.79	1.85	3.7	3.09	2.47	6.79	6.79	8.64	3.7	10.49	6.79	1.85	0	6.17	11.11	6.17	1.23	2.47	3.09
ENSMUSG00000009555	ENSMUST00000120105	Cdk9	0.899501	0.488232	0.411269	0.891921	0.64952	0.242401	-0.168868	0.161289	119	62	966	54	480	49	4824	1.507	-5.024	-7.328	7	0	0	0	0	0	0	0	45.625	5.61	6.54	5.3	5.92	1.56	5.92	4.36	4.67	2.18	5.61	13.08	6.54	3.12	3.74	5.3	5.3	4.98	1.56	3.43	5.3
ENSMUSG00000009563	ENSMUST00000009707	Tor2a	0.717331	0.305404	0.411927	0.813313	0.487025	0.326287	-0.0856397	0.181621	66	64	966	59	504	51	5011	0	-11.35	-34.719	5	0	0	0	0	0	0	0	41.875	8.1	4.98	2.18	3.74	2.18	6.23	4.67	6.85	4.98	3.12	13.08	3.43	1.56	5.61	6.23	7.79	3.12	2.49	1.87	7.79
ENSMUSG00000009566	ENSMUST00000028148	Fpgs	0.891259	0.104927	0.786332	0.841893	0.293155	0.548738	-0.237593	0.188228	59	72	1764	59	450	51	11577	0.816	-10.733	-38.922	15	0	0	0	0	0	0	0	41.9795	7.67	6.47	3.07	3.92	2.39	4.6	6.64	7.16	3.41	3.92	12.44	2.9	1.7	3.41	6.47	8.18	5.45	2.04	1.7	6.47
ENSMUSG00000009569	ENSMUST00000149359	Mrtfb	-0.17176	-0.593887	0.422127	0.393759	0.275868	0.117891	-0.304236	0.869754	218	52	3243	52	4834	46	59109	0	0.933	5.136	15	0	0	4	0	0	0	0	36.886	6.48	3.15	2.96	4.63	0.46	6.02	9.07	3.06	2.04	3.24	10	5.93	2.04	2.41	11.2	12.87	6.85	0.19	1.02	6.39
ENSMUSG00000009575	ENSMUST00000118152	Cbx5	0.561155	0.465031	0.0961243	0.505201	0.549222	-0.0440206	-0.140145	0.0841909	130	57	576	42	8097	41	48273	3.034	6.212	3.252	5	0	0	7	0	0	0	0	33.6842	5.76	4.71	4.71	6.81	1.57	14.66	1.57	4.71	1.05	3.66	5.76	15.18	3.14	3.14	3.14	8.38	3.14	2.09	2.62	4.19
ENSMUSG00000009585	ENSMUST00000165537	Apobec3	0.620564	0.459545	0.161019	0.739572	0.380798	0.358774	0.197754	-0.0787465	109	61	1191	49	1060	42	16022	0.566	0.821	-14.864	8	0	1	2	0	0	0	0	33.1646	3.03	7.32	4.04	4.8	4.55	5.05	5.81	4.29	3.28	4.29	11.11	7.32	2.02	6.82	5.05	6.06	3.54	3.28	4.29	4.04
ENSMUSG00000009585	ENSMUST00000165537	Apobec3	0.620564	0.459545	0.161019	0.739572	0.380798	0.358774	0.197754	-0.0787465	109	61	1191	49	1060	42	16022	0.566	0.821	-14.864	8	0	1	2	0	0	0	0	33.1646	3.03	7.32	4.04	4.8	4.55	5.05	5.81	4.29	3.28	4.29	11.11	7.32	2.02	6.82	5.05	6.06	3.54	3.28	4.29	4.04
ENSMUSG00000009585	ENSMUST00000175714	Apobec3	0.620564	0.459545	0.161019	0.739572	0.380798	0.358774	0.197754	-0.0787465	81	56	1323	49	549	44	15516	0.566	0.445	-7.617	9	0	1	1	0	0	0	0	32.574	2.95	7.5	3.86	4.32	4.55	5	5.68	4.77	2.95	4.32	10.91	6.82	2.05	6.36	5.68	7.05	3.86	3.18	4.09	4.09
ENSMUSG00000009585	ENSMUST00000175714	Apobec3	0.620564	0.459545	0.161019	0.739572	0.380798	0.358774	0.197754	-0.0787465	81	56	1323	49	549	44	15516	0.566	0.445	-7.617	9	0	1	1	0	0	0	0	32.574	2.95	7.5	3.86	4.32	4.55	5	5.68	4.77	2.95	4.32	10.91	6.82	2.05	6.36	5.68	7.05	3.86	3.18	4.09	4.09
ENSMUSG00000009588	ENSMUST00000009732	St6galnac1									105	54	1581	51	706	44	10483	0	-1.783	7.02	9	0	0	0	0	0	0	0	35.619	6.84	8.17	3.04	4.56	1.14	5.51	5.51	4.56	3.04	3.61	11.22	6.84	1.52	5.32	5.51	7.41	6.27	1.9	3.04	4.94
ENSMUSG00000009614	ENSMUST00000102886	Sardh	0.0234572	-0.739936	0.763393	-0.125325	-0.212536	0.0872107	-0.676182	0.5274	635	56	2760	57	1126	51	58874	0	-9.535	-3.994	21	0	1	0	1	0	0	19.32	39.3246	8.81	6.96	3.05	5.11	1.96	6.09	4.03	9.47	3.59	3.05	9.58	2.94	2.18	3.59	5.11	5.55	5.33	1.74	3.7	8.16
ENSMUSG00000009621	ENSMUST00000056176	Vav2	-0.19328	-0.118679	-0.0746005	0.184736	0.146453	0.0382834	0.112884	0.265132	554	76	2607	54	2060	52	164930	3.956	-4.677	-48.197	28	0	1	0	0	0	0	5.43	39.9077	5.41	5.88	2.88	6.45	2.65	7.72	4.49	5.41	2.65	4.61	9.33	7.49	2.88	5.18	5.3	6.8	3.8	1.5	3.46	6.11
ENSMUSG00000009628	ENSMUST00000124501	Tex15	0.681951	0.492934	0.189018	0.784943	0.728118	0.0568252	-0.132192	0.235184	177	62	972	42	1477	40	68259	0	1.776	7.745	11	0	0	0	0	0	0	0	23.6025	4.64	6.81	5.26	4.95	3.1	4.95	4.64	5.57	2.48	4.02	9.6	7.12	4.02	4.64	4.33	8.67	4.95	0.93	4.02	5.26
ENSMUSG00000009630	ENSMUST00000009774	Ppp2cb	0.964269	0.72393	0.24034	0.934376	0.625988	0.308388	0.0680479	-0.0979414	292	85	930	47	247	38	19817	0.675	0.166	-48.052	7	0	1	1	0	0	0	0	29.2208	4.21	6.47	4.53	8.09	3.24	6.15	4.53	7.44	3.24	3.88	10.03	3.56	1.94	4.53	4.53	3.88	6.15	1.62	5.18	6.8
ENSMUSG00000009633	ENSMUST00000009777	G0s2	0.779044	1	-0.220956	0.898914	0.947232	-0.0483176	0.172638	-0.0527682	257	61	312	63	302	43	1057	0	-13.828	3.687	2	0	0	0	0	0	0	0	45.098	13.59	5.83	0	0.97	2.91	8.74	7.77	5.83	1.94	0.97	16.5	5.83	2.91	1.94	2.91	7.77	2.91	0	0.97	9.71
ENSMUSG00000009640	ENSMUST00000102687	Dmap1	0.826182	0.342219	0.483963	0.856372	0.625633	0.230739	-0.253224	0.283413	105	58	1407	54	54	49	7593	0	-5.323	-5.588	11	0	0	0	0	0	0	0	43.6831	9.4	7.91	1.71	5.77	0.64	8.76	3.85	4.91	2.35	2.78	9.4	10.68	1.71	2.99	6.41	5.98	5.34	0.85	2.99	5.56
ENSMUSG00000009647	ENSMUST00000009791	Mcu	-0.071195	-0.603535	0.53234	0.169032	-0.0772608	0.246292	-0.286047	0.526274	289	37	606	49	184	44	9564	0	0.804	7.6	5	0	0	0	0	0	0	0	37	7.96	6.97	1.49	4.98	0.5	8.46	7.46	2.99	1.99	4.48	13.93	7.46	3.48	3.98	2.99	2.99	5.97	1.99	5.47	4.48
ENSMUSG00000009654	ENSMUST00000009798	Oit3									95	49	1641	56	981	40	18821	0	-4.414	-5.009	9	0	0	1	0	0	0	0	40.367	4.03	4.95	5.13	5.68	7.14	7.51	2.56	8.06	4.03	4.21	8.79	3.3	0.92	3.66	5.31	7.33	5.86	0.92	2.75	7.88
ENSMUSG00000009670	ENSMUST00000009814	Tex11	-5.11898	-4.40073	-0.718245						149	54	2844	38	257	38	220992	0	6.625	13.977	30	1	5	0	0	0	0	0	17.9704	7.39	4.65	4.65	4.96	2.01	7.18	3.8	3.48	1.48	6.44	13.2	8.66	4.01	3.8	2.22	6.44	4.01	1.8	4.54	5.28
ENSMUSG00000009681	ENSMUST00000218465	Bcr	0.17149	-0.201326	0.372816	0.727747	0.43911	0.288638	-0.084178	0.640436	71	61	936	56	453	51	8818	1.072	-4.258	8.47	8	0	0	2	0	0	0	0	40	5.79	7.07	3.22	4.5	1.61	7.07	4.18	4.18	0.96	4.82	11.58	6.11	3.54	4.82	5.14	8.36	5.79	0.96	1.93	8.36
ENSMUSG00000009681	ENSMUST00000218465	Bcr	0.17149	-0.201326	0.372816	0.727747	0.43911	0.288638	-0.084178	0.640436	71	61	936	56	453	51	8818	1.072	-4.258	8.47	8	0	0	2	0	0	0	0	40	5.79	7.07	3.22	4.5	1.61	7.07	4.18	4.18	0.96	4.82	11.58	6.11	3.54	4.82	5.14	8.36	5.79	0.96	1.93	8.36
ENSMUSG00000009681	ENSMUST00000164107	Bcr	0.17149	-0.201326	0.372816	0.727747	0.43911	0.288638	-0.084178	0.640436	434	81	3813	57	2592	51	124330	1.072	-5.853	-31.82	23	0	0	3	0	0	0	3.42	46.6509	6.22	6.77	3.07	5.43	1.34	8.27	5.59	5.43	1.73	3.46	9.45	6.46	2.44	3.78	6.14	10.39	4.65	0.94	2.68	5.75
ENSMUSG00000009681	ENSMUST00000164107	Bcr	0.17149	-0.201326	0.372816	0.727747	0.43911	0.288638	-0.084178	0.640436	434	81	3813	57	2592	51	124330	1.072	-5.853	-31.82	23	0	0	3	0	0	0	3.42	46.6509	6.22	6.77	3.07	5.43	1.34	8.27	5.59	5.43	1.73	3.46	9.45	6.46	2.44	3.78	6.14	10.39	4.65	0.94	2.68	5.75
ENSMUSG00000009687	ENSMUST00000162116	Fxyd5	0.760506	0.600255	0.160251	0.550488	0.441951	0.108537	-0.0517142	-0.158303	44	54	537	52	236	56	9346	0.002	2.989	2.238	9	0	0	0	0	0	0	0	30.5085	5.62	5.62	3.93	4.49	1.69	3.37	5.62	4.49	1.69	5.62	9.55	4.49	1.69	2.81	9.55	10.67	12.92	0.56	1.69	3.93
ENSMUSG00000009731	ENSMUST00000009875	Kcnd1	-1.75836	-1.62382	-0.134532	-0.632971	-0.352203	-0.280768	-0.146236	1.27162	1554	55	1956	55	1777	48	15992	0	-5.641	-19.357	6	0	0	2	0	0	0	11.54	37.6923	8.45	7.68	2.92	4.15	2.76	5.38	3.23	7.22	1.69	4.15	9.68	2.92	1.69	6.14	5.84	9.68	6.61	0.92	2.61	6.3
ENSMUSG00000009733	ENSMUST00000229696	Tfcp2	0.314865	-0.336662	0.651527	0.486197	-0.0534666	0.539664	-0.111863	0.283196	134	67	1509	50	1659	45	49262	0	0.226	-18.632	16	0	3	2	0	0	0	0	37.525	4.38	4.78	4.18	5.18	1.39	8.17	6.97	5.78	2.99	5.98	8.96	4.98	1.79	4.58	7.17	7.17	6.18	1.2	2.79	5.38
ENSMUSG00000009739	ENSMUST00000176271	Pou6f1	0.425166	0.2584	0.166766	0.611156	0.535993	0.0751628	-0.0916029	0.277592	714	60	906	58	2955	51	11048	2.375	-4.019	6.296	6	1	0	0	0	0	0	0	48	9.3	4.32	4.65	1.33	1	6.98	8.97	3.99	0.33	5.65	9.3	5.98	1	2.66	10.3	7.31	7.97	1	1	6.98
ENSMUSG00000009741	ENSMUST00000084885	Ubp1	0.457517	0.25319	0.204326	0.599797	0.445177	0.15462	-0.0497069	0.191987	411	78	1623	48	1816	45	46266	1.35	0.331	-22.255	17	0	2	4	2	0	0	0	31.3544	6.3	4.63	3.7	5.93	1.48	6.48	6.67	6.3	2.96	5.19	7.78	5.74	2.22	3.52	5.74	10	5.93	1.11	2.96	5.37
ENSMUSG00000009772	ENSMUST00000082125	Nuak2	1	0.422402	0.577598	0.860945	0.860979	-3.4665e-05	-0.577633	0.438577	104	72	1896	57	1107	45	17363	0	-7.402	-20.226	7	0	0	2	0	0	0	0	42.0635	6.02	6.66	2.69	5.07	1.27	6.66	4.12	7.92	3.49	4.28	10.94	6.81	1.27	2.54	6.81	11.41	3.17	1.27	2.38	5.23
ENSMUSG00000009828	ENSMUST00000009972	Ick	0.876101	0.718452	0.157649	0.835573	0.719894	0.11568	-0.0419696	0.00144167	61	63	303	59	509	39	12373	0	-6.77	-21.53	2	0	0	0	0	0	0	0	30.303	9	10	1	2	8	1	1	12	2	3	13	3	1	3	10	15	3	2	0	1
ENSMUSG00000009863	ENSMUST00000010007	Sdhb	0.890036	0.506499	0.383537	0.843552	0.612358	0.231194	-0.152343	0.105859	202	66	849	53	91	43	17991	0	-5.467	-12.255	8	0	1	1	0	0	0	5.56	37.0107	8.87	6.03	3.19	6.38	4.96	4.61	4.26	6.03	0.71	5.67	8.16	8.87	3.55	2.48	4.96	5.32	5.32	1.42	4.96	4.26
ENSMUSG00000009876	ENSMUST00000010020	Cox4i2				1	1	0			52	57	519	56	156	59	10865	0	-5.98	-19.936	5	0	0	0	0	0	0	0	43.2749	7.56	8.14	1.74	2.91	1.74	8.14	6.4	5.23	2.33	1.74	7.56	7.56	4.07	5.23	4.07	5.81	6.98	3.49	3.49	5.81
ENSMUSG00000009894	ENSMUST00000010038	Snap47	0.701009	-0.0548841	0.755893	0.707637	0.420188	0.287449	-0.468444	0.475072	124	61	1242	51	530	49	42866	0	-4.356	-1.82	5	0	0	0	0	0	0	0	33.9806	5.81	4.84	2.18	4.6	0.97	9.93	5.08	5.08	2.42	5.33	12.35	7.02	2.42	3.39	4.36	9.69	4.6	1.69	1.21	7.02
ENSMUSG00000009900	ENSMUST00000010044	Wnt3a									105	79	1059	59	1597	53	42720	0	-9.05	-13.27	4	0	0	1	0	0	0	0	43.8746	7.67	7.95	3.13	3.69	7.1	6.53	3.13	8.24	3.41	3.41	5.97	3.98	1.7	3.69	4.55	9.09	4.55	2.56	3.13	6.53
ENSMUSG00000009905	ENSMUST00000010049	Kdsr	0.570101	0.434881	0.13522	0.474596	0.406115	0.0684806	-0.0667396	-0.0287653	76	64	999	50	4443	38	39269	0	-2.096	-15.588	10	0	1	8	0	0	0	1.97	31.1178	8.13	3.01	3.31	3.61	2.11	5.72	4.82	7.23	0.6	6.33	9.64	6.93	3.31	3.61	4.22	8.13	5.72	0	3.31	10.24
ENSMUSG00000009907	ENSMUST00000112736	Vps4b	0.740857	0.498222	0.242635	0.616992	0.477775	0.139216	-0.103418	-0.0204469	220	67	1335	44	2984	40	32597	1.292	2.68	-10.371	12	1	1	7	0	0	0	0	25.5079	8.33	4.73	3.83	6.31	0.9	8.11	4.73	6.53	1.35	5.18	9.46	9.46	1.8	3.38	5.18	7.21	4.28	1.35	2.03	5.86
ENSMUSG00000009927	ENSMUST00000080300	Rps25	0.414255	0.373289	0.0409657	0.122436	0.104208	0.0182281	-0.0227377	-0.269081	616	57	378	48	286	40	3289	0.438	1.318	0.499	5	0	1	0	0	0	0	0	41.129	10.4	4.8	4	8	0.8	3.2	1.6	7.2	0.8	3.2	9.6	21.6	0.8	0.8	4.8	5.6	3.2	0.8	2.4	6.4
ENSMUSG00000009941	ENSMUST00000113189	Nxf2	1	0.75604	0.24396						92	55	2058	42	225	40	20227	0	4.891	-11.241	22	0	0	0	0	0	0	0	27.4854	3.21	5.11	5.99	7.45	2.34	6.86	5.11	4.09	1.9	5.11	9.78	8.18	3.36	5.4	4.67	7.45	4.23	1.17	3.94	4.67
ENSMUSG00000009995	ENSMUST00000069722	Taz	0.336991	0.092376	0.244615	0.551719	0.340956	0.210763	-0.0338521	0.24858	311	58	789	53	751	46	7455	0	-2.886	-22.11	10	0	0	0	0	0	0	0	34.8659	4.2	4.96	4.58	3.05	2.29	5.34	3.05	6.11	5.34	5.34	11.45	6.11	3.82	5.73	7.25	4.58	4.58	3.44	1.91	6.87
ENSMUSG00000010021	ENSMUST00000084368	Kif19a									125	60	2994	60	314	58	25187	0	-9.23	-5.154	20	0	0	0	0	0	0	3.03	49.498	7.22	9.93	3.51	4.61	1	8.83	5.52	6.52	2.61	4.51	10.43	4.91	2.21	1.2	5.02	9.43	5.22	0.4	2.01	4.91
ENSMUSG00000010025	ENSMUST00000066277	Aldh3a2	0.719588	0.562827	0.156762	0.615409	0.430261	0.185149	0.0283869	-0.132566	179	62	1599	49	1114	44	43769	0	-0.772	-7.328	10	0	0	3	0	0	0	0	31.0734	7.71	5.64	4.89	4.89	1.88	6.02	4.14	6.58	1.69	6.39	11.47	6.02	2.44	3.95	5.08	6.2	3.76	0.75	3.01	7.52
ENSMUSG00000010044	ENSMUST00000010188	Zmynd10									159	53	1323	55	283	57	4022	0	-6.18	-3.125	12	0	0	0	0	0	0	2.81	39.6355	6.82	5.68	2.95	4.55	3.18	9.32	7.05	4.32	3.18	3.64	15	6.59	2.05	2.95	3.86	5.45	3.41	2.27	1.82	5.91
ENSMUSG00000010045	ENSMUST00000010189	Tmem115	0.976561	0.93339	0.0431707	0.971496	0.97486	-0.00336374	-0.0465344	0.0414696	534	65	1053	59	607	55	4729	0.726	-9.193	0.499	2	0	0	0	0	0	0	5.78	34.6705	10.29	4.86	1.43	3.71	1.14	4	3.43	6.86	2	3.14	18	2.86	2	4.29	5.71	6.29	5.14	1.71	2.57	10.57
ENSMUSG00000010047	ENSMUST00000195752	Hyal2	1	0.902416	0.097584	0.96794	0.991205	-0.0232651	-0.120849	0.0887893	329	61	1422	58	311	51	4835	0	-7.864	-4.864	5	0	0	0	0	0	0	3.73	40.2542	8.88	6.77	4.23	3.59	2.33	5.07	5.29	6.55	3.59	2.11	9.94	2.11	1.06	4.23	5.92	6.55	5.92	3.59	4.44	7.82
ENSMUSG00000010048	ENSMUST00000010192	Ifrd2	0.649068	0.0470692	0.601999	0.737144	0.570131	0.167013	-0.434986	0.523062	247	64	1326	59	483	50	5397	0	-9.399	-3.849	12	0	0	0	0	0	0	4.86	41.5909	12.47	7.71	1.59	5.44	3.4	7.26	3.4	7.48	2.04	3.17	15.42	4.54	0.45	2.72	2.72	8.84	4.31	0.68	1.81	4.54
ENSMUSG00000010051	ENSMUST00000010195	Hyal1	-0.0113018	1	-1.0113	0.801828	1	-0.198172	0.81313	0	61	58	1389	53	1564	50	4021	0	-4.268	-14.284	4	0	2	0	0	0	0	0	32.538	8.23	5.41	3.03	4.55	2.38	5.63	4.98	6.71	2.6	2.6	10.17	3.25	3.03	3.9	6.28	7.36	5.41	3.25	4.33	6.93
ENSMUSG00000010054	ENSMUST00000010198	Tusc2	0.877738	0.677112	0.200626	0.64821	0.674705	-0.0264947	-0.227121	-0.00240671	132	76	333	59	1200	51	2858	0	-16.398	-35.733	3	0	0	0	0	0	0	6.28	40.367	8.18	9.09	1.82	4.55	0	6.36	2.73	10.91	2.73	4.55	6.36	5.45	1.82	5.45	8.18	6.36	3.64	0.91	2.73	8.18
ENSMUSG00000010057	ENSMUST00000010201	Nprl2	0.931481	0.255074	0.676407	0.917333	0.569183	0.34815	-0.328257	0.314108	150	54	1143	53	148	45	3481	0	-1.827	3.977	11	0	0	0	0	0	0	0	40.1055	3.68	5	3.16	5.26	3.68	7.37	5.79	3.68	2.63	7.37	11.05	6.58	1.32	3.68	5.26	6.58	5.79	0.53	4.21	7.37
ENSMUSG00000010064	ENSMUST00000177567	Slc38a3	0.617564	1	-0.382436						165	54	1518	53	773	56	17808	0	-2.522	-14.139	16	0	0	0	0	0	0	3.34	35.5159	8.32	2.38	3.17	2.18	1.78	4.16	3.56	6.73	2.38	8.32	13.07	3.56	3.56	6.73	5.35	6.93	6.34	0.59	3.96	6.93
ENSMUSG00000010067	ENSMUST00000122225	Rassf1	0.904178	0.536925	0.367253	0.907098	0.491315	0.415783	0.0485309	-0.0456104	30	73	1035	56	718	50	10697	1.338	-7.034	-3.125	6	0	0	0	0	0	0	0	39.9417	6.69	10.17	2.91	5.52	3.2	7.27	4.65	6.1	2.91	3.49	11.34	5.81	1.16	3.49	6.1	6.4	4.65	1.16	1.74	5.23
ENSMUSG00000010095	ENSMUST00000010239	Slc3a2	0.911819	0.604115	0.307704	0.903612	0.585355	0.318257	0.0105533	-0.0187599	132	61	1581	55	106	42	6263	2.718	-8.381	-0.226	9	0	0	0	0	0	0	0	40.1905	7.41	4.75	4.18	5.7	0.38	6.08	4.94	7.6	1.71	3.99	15.59	5.32	1.52	3.61	4.75	8.56	4.56	2.47	1.9	4.94
ENSMUSG00000010097	ENSMUST00000010241	Nxf1	0.473291	0.209587	0.263704	0.664167	0.249976	0.414191	0.150487	0.0403893	159	67	1857	46	310	47	13850	2.312	2.452	-15.009	21	0	1	0	0	0	0	1.47	32.2528	5.83	7.93	6.31	6.47	1.62	5.99	4.69	5.66	1.62	4.69	9.22	6.15	1.94	4.05	5.99	7.93	4.53	1.13	3.07	5.18
ENSMUSG00000010110	ENSMUST00000176381	Stx5a	0.762999	0.386749	0.376251	0.861723	0.483649	0.378074	0.00182351	0.0969001	182	57	1068	51	1001	50	14657	0.398	-1.442	-27.183	11	0	1	0	0	0	1	0	35.3107	7.32	6.2	3.94	5.07	0.85	5.35	8.45	3.66	1.41	7.61	10.14	5.63	2.54	3.94	3.94	10.7	5.63	0.28	1.41	5.92
ENSMUSG00000010122	ENSMUST00000010267	Slc47a1									34	70	1704	52	901	42	34681	0	-4.743	-4.284	17	0	1	0	0	0	0	0	29.8587	9.88	3.7	3.35	2.47	3	3.7	4.76	8.47	1.94	8.47	15.34	2.65	2.47	4.23	3.35	5.47	4.59	1.76	2.65	7.76
ENSMUSG00000010136	ENSMUST00000010280	Pifo	1	0.81703	0.18297						41	35	741	45	174	49	17690	0	2.99	3.107	6	0	2	0	0	0	0	0	26.1224	7.32	5.69	4.07	3.66	1.22	6.5	2.44	5.69	3.66	1.63	7.32	10.16	2.85	4.47	8.54	6.91	6.5	1.63	5.28	4.47
ENSMUSG00000010142	ENSMUST00000010286	Tnfrsf13b	0.866121	0.56832	0.297801	0.876547	0.357988	0.518559	0.220758	-0.210332	76	62	750	60	1730	44	22618	0.919	-9.063	-11.82	5	0	0	2	0	0	0	0	43.1452	9.24	8.43	1.61	3.61	8.43	4.82	6.83	7.63	3.21	1.2	7.23	2.01	1.2	4.02	8.03	10.04	6.02	0.4	1.61	4.42
ENSMUSG00000010154	ENSMUST00000010298	Spire2									52	78	2157	61	121	43	36803	0	-11.934	-39.791	15	0	1	1	0	0	0	2.68	46.7225	8.08	9.05	1.53	4.32	3.2	9.47	4.6	6.41	2.09	2.51	10.17	4.74	2.37	3.2	7.38	7.8	4.18	1.25	1.25	6.41
ENSMUSG00000010175	ENSMUST00000175916	Prox1	0.558088	0.26812	0.289968						514	63	2214	51	5185	40	52680	0	0.672	0.643	5	0	1	16	0	0	1	3.51	39.9457	6.51	6.65	4.61	5.56	1.49	7.33	6.92	4.61	2.85	3.39	7.87	5.7	2.99	4.61	6.51	10.85	4.48	0.27	2.17	4.61
ENSMUSG00000010205	ENSMUST00000115487	Raver1	0.547384	0.205084	0.3423	0.577264	0.570663	0.00660083	-0.335699	0.365579	31	67	2247	61	1192	50	17851	0	-10.247	2.672	13	0	0	0	0	0	0	0	43.2396	7.75	6.02	3.07	3.34	1.07	5.35	4.81	11.63	2.94	1.2	14.44	3.74	1.2	2.67	11.76	9.22	3.88	0.27	2.41	3.21
ENSMUSG00000010277	ENSMUST00000010421	2610507B11Rik	0.579126	0.326932	0.252194	0.606408	0.402554	0.203854	-0.0483401	0.0756221	98	80	6705	50	640	44	28872	2.298	-1.534	-29.357	39	0	3	1	0	0	0	3.73	30.318	5.46	5.77	3.49	4.92	1.97	6.27	6.13	4.52	3.54	4.39	13.65	5.1	2.06	3.49	4.79	8.46	5.33	2.1	2.1	6.45
ENSMUSG00000010290	ENSMUST00000010434	AI597479	0.881688	0.799426	0.0822615	0.742464	0.45572	0.286744	0.204482	-0.343706	54	72	699	49	2705	39	17238	0	1.856	-19.357	4	0	0	3	0	0	0	0	36.3636	5.17	6.03	6.9	5.6	0.43	6.47	3.45	4.31	3.88	3.02	10.34	9.48	2.16	1.72	8.19	8.62	5.6	1.29	0.43	6.9
ENSMUSG00000010307	ENSMUST00000010451	Tmem86a	0.891571	0.914501	-0.0229302	0.865219	1	-0.134781	-0.111851	0.0854991	180	67	726	57	925	53	4177	0	-11.193	-21.965	3	0	0	0	0	0	0	0	26.6667	12.45	3.73	0.41	2.07	2.07	2.49	0.83	8.3	2.07	4.56	16.18	2.49	2.9	7.05	4.98	7.88	2.9	2.9	4.56	9.13
ENSMUSG00000010342	ENSMUST00000060835	Tex14	0.378033	0.493529	-0.115496	-0.0297143	-0.321624	0.29191	0.407406	-0.815153	107	58	4353	47	303	36	150759	4.849	0.677	-2.69	31	0	3	0	0	0	0	0	31.677	5.93	4.76	4	5.66	1.72	8.97	5.72	4.97	2.34	3.59	10.48	6.62	1.45	3.31	6.14	10.55	5.86	1.31	2.14	4.48
ENSMUSG00000010358	ENSMUST00000010502	Ifi35	0.870124	0.404736	0.465388	0.878001	0.597828	0.280173	-0.185215	0.193092	195	53	861	54	306	52	10292	0.2	-8.601	0.643	7	0	0	0	0	0	0	2.43	37.5439	4.2	5.59	2.1	3.85	1.4	8.74	10.14	6.99	2.1	3.5	11.89	4.9	1.75	4.2	6.29	5.94	4.2	0	0.7	11.54
ENSMUSG00000010362	ENSMUST00000010506	Rdm1	0.724857	0.488843	0.236014	0.706234	0.371747	0.334487	0.098473	-0.117096	27	62	846	55	251	52	8159	0.883	-7.727	6.586	7	0	1	0	0	0	0	0	36.4286	9.25	5.34	1.42	3.91	2.49	7.83	7.12	4.98	1.42	3.2	11.39	4.98	1.07	5.69	5.34	11.03	2.85	1.07	2.49	7.12
ENSMUSG00000010376	ENSMUST00000163750	Nedd8	0.715471	0.34556	0.369912	0.455318	0.296065	0.159253	-0.210659	-0.0494944	61	63	246	50	207	48	9609	2.22	-6.619	2.672	5	0	0	0	0	0	0	0	35	3.7	4.94	1.23	4.94	0	11.11	6.17	12.35	1.23	9.88	11.11	11.11	2.47	0	3.7	2.47	4.94	0	2.47	6.17
ENSMUSG00000010392	ENSMUST00000010536	Gosr1	0.77512	0.533544	0.241576	0.795052	0.454542	0.340509	0.0989331	-0.0790016	29	58	753	47	3507	45	36978	0	4.635	-0.226	9	0	0	5	0	0	0	0	32.1285	6.4	8.8	6	5.2	0.8	6.4	3.2	5.6	4	6	12	5.2	4	2.8	1.2	9.6	6.8	0.4	2.8	2.8
ENSMUSG00000010406	ENSMUST00000010550	Mrpl52	0.436058	0.357061	0.0789962	0.488797	0.479549	0.00924778	-0.0697484	0.122488	24	65	366	55	28	56	2848	0.757	-8.11	-0.226	5	0	0	0	0	0	0	0	35	9.92	10.74	1.65	3.31	0.83	4.96	9.09	8.26	1.65	0.83	14.05	7.44	2.48	0.83	7.44	4.96	3.31	3.31	0.83	4.13
ENSMUSG00000010453	ENSMUST00000010597	Kansl3	0.721028	0.340893	0.380135	0.780768	0.461711	0.319056	-0.0610785	0.120818	128	64	2634	55	1901	49	33452	0.892	-4.286	-1.241	21	0	1	1	0	0	0	3.08	35.6164	8.21	5.7	2.28	3.99	1.14	4.68	4.33	7.07	2.62	3.99	10.83	5.02	1.71	1.71	7.98	11.97	8.44	0.91	0.46	6.96
ENSMUSG00000010461	ENSMUST00000219315	Eya4									441	60	1920	47	739	37	244668	0	2.608	3.687	20	0	2	1	0	0	2	0	28.2132	6.89	3.29	4.23	5.63	1.25	4.23	5.95	7.2	1.56	2.97	9.08	3.6	2.5	2.82	5.95	13.46	8.76	0.94	5.01	4.69
ENSMUSG00000010476	ENSMUST00000033378	Ebf3									532	74	1656	55	2650	39	120725	0	-4.083	-11.53	16	0	0	12	0	0	0	0	44.5455	6.53	5.63	7.26	3.63	1.81	4.72	4.72	7.99	2.54	4.17	6.53	4.54	3.27	3.99	7.44	7.99	5.63	0.54	2.72	8.35
ENSMUSG00000010517	ENSMUST00000102724	Faf1	0.397146	-0.285926	0.683072	0.54078	0.00407261	0.536707	-0.146365	0.289999	440	77	1950	44	2078	42	287373	0.088	3.653	-17.907	19	0	1	5	0	0	0	2.15	24.2284	6.78	6.63	4.47	6.32	1.23	10.02	5.55	4.01	1.85	4.47	9.4	3.7	3.24	5.08	5.24	8.32	5.08	1.08	1.54	6.01
ENSMUSG00000010529	ENSMUST00000010673	Gm266									53	72	603	68	559	42	1215	0	-20.449	-4.864	1	0	0	3	0	0	0	0	56.7839	11	9.5	1.5	4	2	9	3	6	1	3	10.5	3.5	2	4	6	4	5.5	1	1.5	12
ENSMUSG00000010538	ENSMUST00000010682	Tsacc	0.805771	0.494489	0.311281	0.401484	0.626268	-0.224784	-0.536065	0.131779	99	50	375	48	7	71	14079	0	-0.191	2.238	4	0	0	0	0	0	0	1.32	31.7073	8.06	1.61	5.65	1.61	5.65	5.65	8.87	5.65	2.42	3.23	13.71	8.06	1.61	3.23	7.26	9.68	4.84	0	1.61	1.61
ENSMUSG00000010554	ENSMUST00000141755	Mettl16	0.791825	0.455753	0.336072	0.755525	0.47006	0.285465	-0.0506075	0.0143069	155	64	1662	46	10767	43	57696	0.812	0.758	-7.038	10	0	1	15	0	0	0	3.72	28.442	6.51	7.05	3.8	5.42	2.71	8.68	3.44	6.33	1.81	4.88	10.67	7.05	2.35	2.89	5.06	6.69	4.52	1.45	2.17	6.51
ENSMUSG00000010592	ENSMUST00000010736	Dazl									227	66	897	43	1852	29	14240	0	1.774	6.586	11	0	1	6	0	0	0	0	20.8754	5.37	5.03	5.03	4.36	1.68	4.03	6.38	5.03	2.35	4.7	4.03	4.7	2.35	3.69	10.07	9.73	6.04	0.67	5.37	9.4
ENSMUSG00000010601	ENSMUST00000176074	Apol7a									348	52	1257	47	785	46	10892	0	-0.974	-7.762	6	0	0	0	0	0	0	8.66	27.5779	9.33	4.07	3.11	11	0.72	12.44	4.07	4.78	1.67	3.83	11	6.22	1.44	1.67	1.67	8.37	6.7	0.72	0.48	6.7
ENSMUSG00000010607	ENSMUST00000148088	Pigyl	0.852696	0.854232	-0.0015358	1	0.683391	0.316609	0.318145	-0.170841	345	58	216	59	115	53	1380	0	-9.295	5.281	2	0	0	0	0	0	0	6.89	30	4.23	2.82	1.41	0	2.82	4.23	0	5.63	2.82	2.82	18.31	1.41	4.23	7.04	7.04	11.27	7.04	2.82	4.23	9.86
ENSMUSG00000010608	ENSMUST00000048155	Rbm25	0.458424	0.307527	0.150897	0.409607	0.377729	0.0318779	-0.119019	0.0702017	181	65	2517	44	1528	34	50872	4.199	7.466	0.933	19	0	0	2	0	0	0	0	25.8065	5.01	13.01	2.39	6.92	0.72	17.54	2.86	3.46	1.31	4.77	6.68	10.38	1.91	1.79	7.16	5.13	2.86	0.72	1.55	3.82
ENSMUSG00000010609	ENSMUST00000111108	Psen2	0.794185	0.211907	0.582278	0.800168	0.452508	0.34766	-0.234618	0.240601	81	77	1347	57	569	48	29297	0.209	-7.112	-25.878	11	0	0	0	0	0	0	0	35.3468	7.37	2.9	2.01	3.79	2.23	8.04	2.46	6.47	0.89	6.03	12.72	3.35	3.79	4.91	6.03	6.92	5.58	1.79	4.91	7.81
ENSMUSG00000010651	ENSMUST00000010795	Acaa1b									99	62	1275	59	315	53	9071	0	-12.005	-14.574	12	0	0	1	0	0	0	0	40.8983	12.26	5.66	3.54	3.77	2.12	4.48	4.95	11.08	1.42	5.19	8.96	4.01	2.12	2.36	4.95	7.78	4.95	0	1.42	8.96
ENSMUSG00000010660	ENSMUST00000010804	Plcd1	0.317186	0.525446	-0.20826	1	0.569146	0.430854	0.639114	0.0436997	111	65	2271	56	275	50	21976	0	-7.238	-12.835	15	0	1	0	0	0	0	0	43.3113	5.95	5.82	3.57	7.01	1.85	6.88	5.82	5.82	2.91	4.5	10.05	5.95	2.25	4.23	4.76	8.47	3.97	1.59	2.78	5.82
ENSMUSG00000010663	ENSMUST00000010807	Fads1	0.713005	0.596279	0.116726	0.8146	0.760322	0.0542781	-0.0624482	0.164043	164	73	1344	54	1952	47	13987	0	-3.968	1.223	12	0	0	3	0	0	0	0	40.1345	6.71	4.47	4.03	3.58	0.89	3.58	4.47	5.15	6.49	4.25	12.08	5.15	2.68	7.83	5.82	4.92	4.03	3.58	3.8	6.49
ENSMUSG00000010721	ENSMUST00000179191	Lmbr1	-0.321938	0.0644219	-0.38636	0.00702484	0.222328	-0.215303	0.171057	0.157906	198	66	1389	43	3249	41	148577	0	2.459	-24.748	17	0	3	10	0	0	0	0	19.0889	6.49	4.55	3.03	3.46	1.73	6.28	2.16	5.84	1.73	7.58	16.88	3.9	3.46	5.19	2.38	8.66	5.19	1.08	3.68	6.71
ENSMUSG00000010721	ENSMUST00000179191	Lmbr1	-0.321938	0.0644219	-0.38636	0.00702484	0.222328	-0.215303	0.171057	0.157906	198	66	1389	43	3249	41	148577	0	2.459	-24.748	17	0	3	10	0	0	0	0	19.0889	6.49	4.55	3.03	3.46	1.73	6.28	2.16	5.84	1.73	7.58	16.88	3.9	3.46	5.19	2.38	8.66	5.19	1.08	3.68	6.71
ENSMUSG00000010721	ENSMUST00000055195	Lmbr1	-0.321938	0.0644219	-0.38636	0.00702484	0.222328	-0.215303	0.171057	0.157906	192	66	1473	42	3261	41	148583	0	2.795	-24.748	17	0	3	10	0	0	0	2.92	18.4049	6.53	4.29	3.27	3.27	1.84	6.33	2.04	5.51	1.63	7.14	17.55	3.88	3.27	6.33	2.45	8.78	4.9	1.22	3.27	6.53
ENSMUSG00000010721	ENSMUST00000055195	Lmbr1	-0.321938	0.0644219	-0.38636	0.00702484	0.222328	-0.215303	0.171057	0.157906	192	66	1473	42	3261	41	148583	0	2.795	-24.748	17	0	3	10	0	0	0	2.92	18.4049	6.53	4.29	3.27	3.27	1.84	6.33	2.04	5.51	1.63	7.14	17.55	3.88	3.27	6.33	2.45	8.78	4.9	1.22	3.27	6.53
ENSMUSG00000010751	ENSMUST00000171066	Tnfrsf22	0.622349	0.701003	-0.0786544	0.638708	0.650899	-0.0121902	0.0664642	-0.0501047	331	51	591	48	858	49	1780	0	-2.81	-3.27	1	0	0	1	0	0	0	0	22.0513	8.16	3.06	2.55	7.14	1.53	2.55	7.14	8.67	3.06	5.1	6.12	6.63	1.53	2.55	6.63	6.63	5.61	6.63	1.53	7.14
ENSMUSG00000010755	ENSMUST00000010899	Cars	0.645567	0.304366	0.341201	0.628875	0.478725	0.150149	-0.191052	0.174359	84	68	2496	51	642	55	42861	3.387	-2.667	-20.516	23	0	1	0	0	0	0	0	38.3133	7.58	6.26	3.37	6.26	1.32	8.78	4.45	5.54	2.29	3.61	10.11	7.94	2.53	4.09	4.57	7.22	3.73	1.44	3.37	5.54
ENSMUSG00000010830	ENSMUST00000010974	Kdelr3									139	75	645	49	627	47	11329	0	-1.881	-20.226	5	0	0	0	0	0	0	0	29.5775	3.27	3.74	3.27	2.8	1.4	3.27	2.34	3.74	0.93	7.48	14.95	5.14	2.8	8.88	2.34	7.01	7.48	1.87	7.48	9.81
ENSMUSG00000010911	ENSMUST00000011055	Apip	0.824533	0.569629	0.254903	0.875531	0.624779	0.250753	-0.00415061	0.0551494	113	63	726	47	80	34	18970	0	-0.581	-1.386	7	0	0	0	0	0	0	0	27.9167	6.22	3.73	2.49	4.98	4.56	7.05	4.56	9.13	3.32	6.22	5.81	7.47	4.98	2.9	5.81	4.56	4.98	1.24	4.15	5.81
ENSMUSG00000010914	ENSMUST00000011058	Pdhx	0.806368	0.303477	0.502891	0.907105	0.599846	0.307259	-0.195632	0.296368	64	60	1506	50	936	35	52439	0	-2.149	-14.864	11	0	1	2	0	0	0	0	28.6	10.58	5.19	2.79	5.59	1	5.79	4.59	6.59	1.2	5.99	8.78	6.39	2.2	2.4	8.78	7.58	5.19	1.4	0.8	7.19
ENSMUSG00000010936	ENSMUST00000213003	Vac14	0.54011	0.0119542	0.528156	0.71783	0.519194	0.198636	-0.32952	0.507239	305	74	429	55	2406	54	101812	0	-5.605	-11.965	19	0	0	1	0	0	0	0	42.5532	9.86	4.93	5.63	4.93	2.82	5.63	3.52	5.63	2.82	6.34	13.38	7.04	1.41	4.23	4.23	4.23	2.82	0	3.52	7.04
ENSMUSG00000011008	ENSMUST00000098524	Mcoln2	0.805778	0.0911023	0.714675	0.761218	0.300782	0.460437	-0.254238	0.209679	154	68	1617	46	721	43	45339	0	2.747	-10.081	14	0	1	3	1	0	0	0	32.4022	4.46	4.46	3.9	5.2	3.35	5.02	4.65	4.65	2.04	7.81	12.64	5.95	2.23	6.69	1.49	7.43	5.76	1.3	5.02	5.95
ENSMUSG00000011034	ENSMUST00000011178	Slc5a1									238	64	1998	51	1868	40	58652	0	-3.584	-6.458	15	0	2	3	0	0	0	0	30.2711	8.57	3.31	2.56	3.61	2.56	4.36	1.8	7.97	0.9	10.53	10.38	4.66	4.21	5.71	4.21	6.32	6.02	1.8	3.91	6.62
ENSMUSG00000011096	ENSMUST00000054343	Akt1s1	0.689257	0.62881	0.0604474	0.759084	0.737168	0.0219163	-0.038531	0.108358	132	58	774	66	686	58	6198	0	-11.257	-2.255	5	0	0	0	0	0	0	0	53.125	13.62	7.78	1.17	6.61	1.56	10.12	3.5	6.23	1.17	0.78	7.78	2.33	1.56	2.33	15.18	6.61	6.61	0.78	1.17	3.11
ENSMUSG00000011114	ENSMUST00000142736	Tbrg1	0.926046	0.453797	0.472249	0.915972	0.494363	0.421608	-0.0506404	0.0405661	93	63	606	53	1062	47	8056	0.67	-5.166	-11.241	8	0	0	0	0	0	0	0	39	8.46	6.47	1.49	1	0.5	9.45	2.49	7.96	1	2.99	11.44	13.43	1.99	1.99	6.97	10.45	4.48	0.5	2.49	4.48
ENSMUSG00000011148	ENSMUST00000180015	Adssl1	0.240699	0.105389	0.13531	0.0946489	-1.2465	1.34115	1.20584	-1.35189	26	60	1443	57	350	43	21268	0	-8.845	14.412	13	0	0	1	0	0	0	0	42.5887	7.08	5.42	3.75	5.21	1.25	6.04	4.17	10.83	2.5	5.21	9.17	6.46	1.88	3.75	4.79	4.38	5.42	1.67	2.5	8.54
ENSMUSG00000011148	ENSMUST00000180015	Adssl1	0.240699	0.105389	0.13531	0.0946489	-1.2465	1.34115	1.20584	-1.35189	26	60	1443	57	350	43	21268	0	-8.845	14.412	13	0	0	1	0	0	0	0	42.5887	7.08	5.42	3.75	5.21	1.25	6.04	4.17	10.83	2.5	5.21	9.17	6.46	1.88	3.75	4.79	4.38	5.42	1.67	2.5	8.54
ENSMUSG00000011148	ENSMUST00000021726	Adssl1	0.240699	0.105389	0.13531	0.0946489	-1.2465	1.34115	1.20584	-1.35189	74	64	1374	58	329	43	21295	0	-8.413	-9.357	13	1	0	1	0	0	0	0	44.0789	7	5.69	3.72	5.47	1.09	5.91	4.38	11.38	2.41	5.47	8.53	6.56	1.75	3.94	3.94	4.16	5.69	1.53	2.63	8.75
ENSMUSG00000011148	ENSMUST00000021726	Adssl1	0.240699	0.105389	0.13531	0.0946489	-1.2465	1.34115	1.20584	-1.35189	74	64	1374	58	329	43	21295	0	-8.413	-9.357	13	1	0	1	0	0	0	0	44.0789	7	5.69	3.72	5.47	1.09	5.91	4.38	11.38	2.41	5.47	8.53	6.56	1.75	3.94	3.94	4.16	5.69	1.53	2.63	8.75
ENSMUSG00000011158	ENSMUST00000011302	Brf1	0.327531	-0.0842418	0.411773	0.479966	0.329031	0.150935	-0.260837	0.413273	348	73	2031	55	236	49	40620	0.699	-6.28	-38.342	18	0	0	0	0	0	0	0	40.7407	8.28	6.51	2.66	7.1	2.51	9.76	2.81	8.58	2.22	3.99	10.8	6.36	2.22	1.92	4.73	8.43	4.29	0.3	1.92	4.59
ENSMUSG00000011171	ENSMUST00000011315	Vipr2									118	69	1314	51	1951	47	68534	0	-1.814	-24.574	13	0	2	1	0	0	0	0	30.0459	4.58	5.26	3.2	3.43	4.81	4.12	3.43	5.49	2.29	7.32	12.59	2.75	1.6	5.03	3.66	10.98	5.26	2.97	3.89	7.32
ENSMUSG00000011179	ENSMUST00000171737	Odc1	0.906269	0.558024	0.348245	0.855983	0.360008	0.495975	0.14773	-0.198016	489	69	1386	48	333	42	6291	0.908	-0.494	11.078	12	0	1	1	0	0	0	5.39	29.7826	8.68	4.12	3.25	7.59	2.6	5.86	3.47	6.29	2.17	5.64	6.94	6.29	3.25	4.77	4.56	7.59	4.77	1.08	3.47	7.59
ENSMUSG00000011254	ENSMUST00000011398	Thg1l	0.925598	0.604149	0.321449	0.85715	0.732102	0.125048	-0.196401	0.127953	29	62	897	51	1324	43	8652	1.636	-3.906	-0.516	6	0	0	1	0	0	0	0	37.3737	8.05	8.05	5.03	4.36	2.01	7.38	4.7	3.69	2.68	3.36	8.72	5.37	2.35	6.04	3.36	5.03	5.03	2.68	4.03	8.05
ENSMUSG00000011256	ENSMUST00000011400	Adam19	0.232332	0.209758	0.0225743	0.462508	0.585963	-0.123455	-0.146029	0.376206	122	62	2763	56	3498	48	91352	0.853	-6.149	-20.516	23	0	1	3	0	0	0	5.55	41.1317	6.52	6.63	4.13	3.48	5.54	5.87	4.57	9.35	3.8	2.93	7.83	4.46	1.85	2.83	9.02	7.5	5.54	1.09	2.83	4.24
ENSMUSG00000011257	ENSMUST00000080178	Pabpc4	0.471551	0.329987	0.141565	0.377839	0.385345	-0.00750673	-0.149071	0.0553586	704	59	1983	54	332	34	15922	1.576	-4.764	-34.212	15	1	0	0	0	0	0	0	39.6055	11.67	6.21	3.94	4.09	0.91	6.21	5.91	7.73	1.67	3.03	7.42	6.97	3.64	4.24	6.21	7.12	3.48	0.3	2.73	6.52
ENSMUSG00000011263	ENSMUST00000137613	Exoc3l2									132	55	2370	66	1514	54	33432	0	-18.57	-18.777	12	0	0	2	0	0	0	0	46.1929	13.18	13.05	1.39	3.93	1.27	9	3.42	7.35	1.9	2.41	15.21	1.52	0.76	2.03	7.48	4.82	2.92	1.01	1.65	5.7
ENSMUSG00000011267	ENSMUST00000108453	Zfp296				1	1	0			95	66	1338	60	97	38	3370	0	-7.351	-20.516	3	0	0	0	0	0	0	0	43.9189	10.34	6.52	1.12	4.94	4.49	3.37	4.94	7.19	3.82	2.02	7.64	6.74	2.02	1.57	9.66	9.66	6.07	1.12	1.57	5.17
ENSMUSG00000011306	ENSMUST00000011450	Sugp1	0.686773	0.401663	0.28511	0.809285	0.477574	0.331711	0.0466017	0.0759105	234	53	1932	54	515	49	29535	2.895	-3.203	-7.907	14	1	0	0	0	0	0	2.85	44.704	8.71	6.07	3.58	5.29	0.31	9.49	6.07	6.38	1.87	2.95	7.31	8.71	3.58	3.42	8.71	5.91	3.73	1.09	2.95	3.89
ENSMUSG00000011382	ENSMUST00000011526	Dhdh	0.615974	0.169209	0.446765	0.537599	0.256084	0.281515	-0.16525	0.0868744	42	70	1002	54	4279	44	17819	0	-6.841	-12.835	7	0	1	5	0	0	0	0	37.6506	11.11	4.8	3.6	3.3	1.8	7.81	3.9	7.81	2.1	4.5	9.61	5.11	2.4	4.2	5.41	6.01	3.6	1.2	2.4	9.31
ENSMUSG00000011427	ENSMUST00000032796	Zfp790	0.863416	0.642271	0.221145	0.79899	0.609684	0.189306	-0.031839	-0.0325872	327	52	2340	48	709	42	14822	0	0.578	4.267	5	0	4	2	0	0	0	9.65	37.1465	5.39	5.52	2.31	3.72	5.52	8.86	5.01	6.29	5.78	3.08	7.7	10.91	1.54	5.01	4.62	6.93	5.52	0.9	2.44	2.95
ENSMUSG00000011658	ENSMUST00000071207	Fuz	0.362764	-0.0864284	0.449192	0.478614	0.361196	0.117418	-0.331774	0.447625	173	58	1248	59	277	55	4546	0.749	-9.032	-22.835	11	1	0	0	0	0	0	3.93	37.1981	5.78	6.51	1.93	2.89	2.41	6.51	3.86	8.19	2.65	2.17	18.8	1.45	2.41	2.89	9.16	6.75	5.78	1.69	1.45	6.75
ENSMUSG00000011751	ENSMUST00000011895	Sptbn4									152	81	7686	63	909	58	90217	0	-15.384	-25.733	36	0	1	0	0	0	0	0	51.1328	11.75	9.53	2.03	4.37	0.86	11.56	7.22	6.29	2.73	1.99	12.73	3.94	1.6	1.99	3.75	5.39	3.2	1.91	1.29	5.86
ENSMUSG00000011752	ENSMUST00000011896	Pgam1	0.906197	0.729613	0.176584	0.658399	0.656952	0.00144724	-0.175137	-0.0726612	125	70	765	56	885	45	6738	0.655	-7.406	-2.835	4	0	0	0	0	0	0	0	44.664	9.45	6.69	3.54	5.51	0.79	8.66	3.15	6.69	2.76	5.91	9.45	7.09	2.36	2.36	5.91	4.33	3.94	2.76	3.15	5.51
ENSMUSG00000011831	ENSMUST00000112642	Evi5	-9.18342	-6.55948	-2.62394	-1.06931	-1.61963	0.550314	3.17426	4.93985	68	43	2430	44	3351	37	130313	0	4.027	16.875	18	0	2	12	0	0	0	1.81	27.599	5.93	5.93	3.71	4.2	1.36	10.75	7.17	3.46	2.35	4.7	10.88	7.17	3.71	3.46	3.58	9.64	4.33	0.99	1.73	4.94
ENSMUSG00000011832	ENSMUST00000177053	Evi5l	0.633625	-0.112624	0.746249	0.646194	0.0516541	0.59454	-0.151709	0.164278	228	70	1221	55	93	48	27135	0	-3.834	-12.4	11	0	0	0	0	0	0	0	40.7407	5.42	5.67	2.71	3.45	1.72	9.36	5.67	3.69	1.97	3.45	12.32	5.67	5.17	4.68	4.93	10.84	3.69	1.48	3.2	4.93
ENSMUSG00000011837	ENSMUST00000011981	Snapc2	0.946927	0.700857	0.24607	0.970649	0.814132	0.156517	-0.0895526	0.113275	42	68	1080	60	414	50	3141	0	-9.512	-8.197	5	0	0	0	0	0	0	0	39.3855	11.7	7.24	1.11	3.34	0.84	8.64	4.74	8.08	1.67	1.95	10.31	4.18	2.51	1.67	11.7	7.8	5.57	0.84	1.11	5.01
ENSMUSG00000011877	ENSMUST00000037285	Git1	0.796893	0.688163	0.10873	0.848956	0.760643	0.0883129	-0.0204169	0.0724797	21	85	2313	57	1178	59	14225	0.083	-7.185	-4.429	20	0	0	0	0	0	0	0	44.7334	8.83	7.01	2.73	6.23	1.82	7.01	5.71	5.19	3.51	2.73	11.56	5.32	1.43	2.34	6.49	9.61	4.68	0.52	2.08	5.19
ENSMUSG00000011884	ENSMUST00000112214	Gltp	0.420498	0.353599	0.0668982	0.382737	0.345372	0.0373655	-0.0295326	-0.00822755	80	81	540	56	324	52	20859	1.297	-3.536	-22.4	5	0	0	0	0	0	0	0	49.4382	10.61	2.23	5.03	6.15	1.68	6.7	2.79	3.35	2.23	6.7	11.73	8.94	2.23	5.03	5.59	2.79	5.59	0.56	5.03	5.03
ENSMUSG00000011958	ENSMUST00000085393	Bnip2	0.843882	0.685556	0.158326	0.825237	0.55661	0.268627	0.110301	-0.128946	243	67	945	44	1140	40	18752	0.721	3.78	0.643	10	0	2	2	0	0	0	0	26.8371	3.82	6.05	3.5	8.28	0.96	10.19	3.5	6.69	0.96	6.37	9.55	6.37	2.87	3.18	6.37	5.41	4.46	1.91	3.82	5.73
ENSMUSG00000011960	ENSMUST00000169707	Ccnt1	0.903284	0.673022	0.230261	0.830229	0.534826	0.295403	0.065142	-0.138197	700	59	2175	49	4522	39	32235	3.816	1.371	-1.53	10	0	1	5	0	0	2	7.78	33.3333	7.6	4.56	3.31	4.14	0.83	5.94	5.8	3.59	5.39	3.31	8.98	6.49	2.62	2.62	7.46	12.71	6.63	0.97	2.35	4.7
ENSMUSG00000012017	ENSMUST00000012161	Scarf2									97	85	2502	67	709	57	11012	0	-16.78	-37.038	11	0	0	1	0	1	0	0	52.6442	10.8	8.88	2.16	3.48	9.48	5.64	3.48	10.92	3	0.72	6	3.6	0.6	1.44	9.72	8.4	5.28	1.44	1.2	3.72
ENSMUSG00000012076	ENSMUST00000219419	Brms1l	0.755476	0.728961	0.0265151	0.842063	0.768727	0.0733362	0.0468211	0.0397654	101	71	537	47	878	39	33334	0.745	3.121	-3.559	9	0	0	2	0	0	0	0	35.0282	4.49	7.87	2.81	7.87	3.37	14.04	5.06	4.49	3.37	3.37	6.74	6.18	3.37	1.12	2.25	11.8	4.49	0	2.81	4.49
ENSMUSG00000012114	ENSMUST00000231674	Med15	0.264392	0.0350771	0.229315	0.589654	0.41375	0.175904	-0.0534107	0.378673	85	73	267	62	69	57	67639	1.648	-1.432	-14.27	4	0	0	0	0	0	0	0	47.1264	14.77	9.09	1.14	2.27	5.68	1.14	5.68	1.14	11.36	0	11.36	2.27	3.41	1.14	10.23	13.64	2.27	1.14	0	2.27
ENSMUSG00000012117	ENSMUST00000105886	Dhdds	0.504012	0.22877	0.275242	0.65543	0.452406	0.203024	-0.0722182	0.223636	62	35	885	53	68	57	29445	0	-4.281	-9.936	7	0	0	0	0	0	0	0	35.4949	8.16	8.16	3.74	3.4	3.06	9.18	5.78	5.1	2.72	3.74	12.93	5.44	1.7	4.42	2.38	6.46	3.74	3.06	2.04	4.76
ENSMUSG00000012123	ENSMUST00000121391	Crybg2	0.738415	-0.123744	0.862159	0.933943	0.326455	0.607488	-0.254671	0.450199	113	52	4551	58	97	39	24053	0	-9.507	-2.545	20	0	0	0	0	0	0	2.65	39.538	6.33	5.8	1.98	3.43	1.58	8.64	4.55	8.84	2.11	2.7	8.38	3.96	1.32	2.84	10.75	10.09	5.21	1.72	1.65	8.11
ENSMUSG00000012126	ENSMUST00000074690	Ubxn11	0.454783	0.305483	0.149299	0.431447	-0.438946	0.870393	0.721094	-0.74443	99	65	1455	56	19	57	24194	1.582	-7.997	1.803	15	0	0	0	0	0	0	3.7	43.4783	4.75	7.85	3.1	6.82	1.24	8.88	7.44	6.4	0.41	4.55	10.33	3.93	4.13	3.31	7.64	7.02	4.13	1.03	1.65	5.37
ENSMUSG00000012187	ENSMUST00000113524	Mogat1	1	1	0						147	54	1008	46	73	38	27003	0	-1.094	1.078	7	1	1	0	0	0	0	4.76	27.5449	4.18	3.28	3.58	2.39	1.79	4.78	4.18	7.76	3.28	5.67	10.75	5.97	2.69	7.46	6.27	4.78	4.48	2.99	5.97	7.76
ENSMUSG00000012211	ENSMUST00000146107	Tex22	0.688631	1	-0.311369	1	1	0	0.311369	0	537	58	570	58	23	60	14415	0	-7.443	-12.4	3	0	0	0	0	0	0	4.7	50.5319	7.41	8.47	2.12	7.41	1.06	7.41	13.76	3.17	1.59	2.12	8.99	2.12	2.12	1.59	9.52	8.99	6.35	2.65	0	3.17
ENSMUSG00000012296	ENSMUST00000180283	Tjap1	0.904251	0.641648	0.262603	0.852537	0.798786	0.0537512	-0.208852	0.157138	186	63	1620	59	562	51	25176	0	-7.769	7.02	9	0	0	1	0	0	0	6.14	47.3978	8.16	7.61	2.78	4.64	1.3	10.2	4.45	4.45	3.15	1.86	11.32	4.64	1.3	1.86	10.95	11.69	3.53	0.56	1.11	4.45
ENSMUSG00000012350	ENSMUST00000090475	Ehf									227	44	903	49	3339	39	39846	0	2.282	-3.704	9	1	0	7	0	0	0	5.8	33.4448	4.33	4.67	6	5	1.67	6.67	5.67	5.33	4	4	9.33	6.67	2.67	3.67	4.33	9.67	5	3.67	4	3.67
ENSMUSG00000012396	ENSMUST00000012540	Nanog	0.672269	0.699959	-0.0276899	1	1	0	0.0276899	0.300041	215	43	918	51	1078	39	7066	0	-2.987	8.18	4	1	0	2	0	0	0	1.51	40.1316	6.56	2.3	6.56	1.97	1.64	6.23	9.51	4.59	1.97	1.31	8.85	5.25	2.3	2.95	7.87	13.77	6.23	4.26	2.62	3.28
ENSMUSG00000012405	ENSMUST00000080281	Rpl15	0.312689	0.316587	-0.00389796	0.454444	0.434993	0.01945	0.023348	0.118407	119	61	615	52	1188	36	3245	0	-6.369	-3.414	4	0	1	2	0	0	0	2.73	33.0049	6.86	16.18	1.96	2.45	0.98	2.94	4.41	8.82	5.39	3.92	7.35	8.33	1.47	2.94	4.41	4.41	3.92	2.45	4.9	5.88
ENSMUSG00000012422	ENSMUST00000161568	Tmem167	0.860053	0.768741	0.0913125	0.67443	0.569786	0.104644	0.0133315	-0.198955	658	55	219	42	7812	37	23135	0	1.3	-3.414	4	0	0	15	0	0	0	6.17	19.7183	8.33	5.56	2.78	1.39	6.94	1.39	2.78	4.17	0	15.28	13.89	4.17	2.78	6.94	2.78	8.33	4.17	1.39	2.78	4.17
ENSMUSG00000012428	ENSMUST00000115421	Steap4									87	69	1413	48	1655	39	21757	0	1.636	-2.255	5	0	3	2	0	0	0	0	22.8145	7.45	5.53	3.83	3.62	2.13	3.19	3.4	5.74	1.49	7.02	13.83	4.47	1.91	4.89	4.47	7.87	5.11	1.91	5.11	7.02
ENSMUSG00000012429	ENSMUST00000049744	Mplkip	0.871763	0.781895	0.0898676	0.862033	0.70629	0.155743	0.0658753	-0.0756046	72	61	537	60	2063	35	3693	0	-10.773	-1.386	2	0	0	6	0	0	0	0	44.0678	2.81	8.43	3.37	1.69	0.56	2.81	5.62	17.42	2.81	1.12	2.25	2.25	1.69	5.06	15.73	13.48	4.49	1.12	5.62	1.69
ENSMUSG00000012443	ENSMUST00000012587	Kif11	0.761396	0.272511	0.488885	0.626996	0.323394	0.303602	-0.185284	0.0508828	191	67	3159	41	1469	38	45457	1.889	5.065	-3.27	22	0	5	2	0	0	0	0	24.4529	5.7	4.66	4.75	4.37	1.71	10.74	4.66	3.9	2.28	5.23	10.74	8.37	1.9	2.57	2.57	9.89	7.98	0.29	1.62	6.08
ENSMUSG00000012483	ENSMUST00000012627	Rpa3	0.786687	0.53331	0.253377	0.443917	-0.0655595	0.509477	0.256099	-0.598869	75	63	366	43	229	25	3238	0	0.298	-2.69	4	0	0	1	0	0	0	0	26.6667	4.96	2.48	4.13	4.96	1.65	10.74	3.31	6.61	1.65	7.44	9.92	7.44	4.13	4.96	6.61	3.31	4.96	0	2.48	8.26
ENSMUSG00000012519	ENSMUST00000120432	Mlkl	0.849811	0.899986	-0.0501753	0.503644	0.784573	-0.280929	-0.230753	-0.115414	356	59	1395	45	225	43	26378	0	3.895	10.064	11	0	1	0	0	0	0	0	30.4536	3.88	5.6	3.66	4.74	2.16	9.27	6.25	4.74	2.16	7.33	10.34	9.05	1.72	3.23	4.31	7.54	4.31	1.29	2.37	6.03
ENSMUSG00000012535	ENSMUST00000012679	Tnpo3	0.70116	0.314328	0.386833	0.593086	0.497283	0.0958024	-0.29103	0.182956	402	63	2772	46	1077	42	69061	1.306	1.525	-17.183	23	0	3	2	0	0	0	0	25.9219	6.72	4.66	3.25	4.98	3.36	7.37	5.42	4.23	3.47	4.55	14.08	3.79	2.6	4.01	4.12	6.07	5.74	1.19	2.17	8.23
ENSMUSG00000012609	ENSMUST00000040179	Ttll5	0.445347	0.210095	0.235252	0.289234	0.196981	0.0922528	-0.142999	-0.0131139	475	60	3987	49	619	51	229051	0.745	1.878	-11.241	34	0	3	0	0	0	0	2.9	31.9518	7.61	6.17	4.52	3.39	1.13	6.85	5.35	5.2	3.01	4.44	9.49	6.02	1.88	2.94	5.95	11.52	5.42	0.83	2.86	5.42
ENSMUSG00000012640	ENSMUST00000107986	Zfp715	0.909792	0.648235	0.261557	0.821571	0.430004	0.391567	0.13001	-0.21823	172	57	2661	42	1351	32	16733	0	2.298	-5.154	5	0	4	7	0	0	0	1.38	24.9718	3.95	3.84	2.6	2.82	5.76	7.67	6.21	6.43	6.09	3.72	7.11	10.16	0.79	4.51	5.3	9.26	5.08	0.68	3.61	4.4
ENSMUSG00000012705	ENSMUST00000012849	Retn	-4.23065	-6.51098	2.28034	0.355941	-0.200596	0.556537	-1.7238	6.31039	84	54	345	50	445	50	4341	0	-3.407	6.441	5	0	0	0	0	0	0	0	28.3186	7.89	3.51	4.39	4.39	9.65	4.39	2.63	5.26	0.88	6.14	11.4	7.02	1.75	5.26	5.26	10.53	2.63	2.63	0	4.39
ENSMUSG00000012819	ENSMUST00000105464	Cdh23	-0.528157	-0.459771	-0.0683857	0.192937	0.16593	0.0270068	0.0953925	0.625701	407	64	10059	55	624	54	393741	7.102		-5.588	70	0	0	0	0	0	0	0	41.0027	6.44	5.16	6.03	8.38	0.36	6	2.86	6.32	1.61	6.5	9.01	2.45	1.34	3.91	5.7	6.24	7.82	0.45	3.46	9.96
ENSMUSG00000012848	ENSMUST00000004554	Rps5	0.211076	0.128648	0.0824274	0.150419	0.0526071	0.0978122	0.0153848	-0.0760413	100	66	615	53	46	41	4397	1.055	-4.689	-10.806	6	0	0	0	0	0	0	0	35.9606	11.76	8.33	5.88	4.41	1.47	6.37	2.94	4.9	1.96	7.84	7.35	7.84	2.45	1.96	3.43	5.39	5.39	1.47	2.45	6.37
ENSMUSG00000012889	ENSMUST00000093380	Podnl1	0.331923	0.327318	0.00460475	0.649045	0.452874	0.196171	0.191567	0.125556	110	58	1680	59	300	58	6539	0	-7.42	-6.748	10	0	0	0	0	0	0	3.17	43.9068	8.41	8.41	5.9	3.4	0.89	5.72	3.94	4.47	5.19	1.97	20.93	1.97	0.72	2.33	7.16	7.16	4.65	0.54	1.79	4.47
ENSMUSG00000013033	ENSMUST00000141158	Adgrl1	0.221389	0.117846	0.103544	0.381256	0.433642	-0.052386	-0.15593	0.315797	912	76	4401	57	2868	54	41850	0	-6.5	-5.733	23	0	0	1	0	0	0	0	40	7.98	5.73	5.53	4.16	2.39	5.59	3.07	7.03	1.77	3.75	9.82	3.07	1.71	3.75	7.71	7.57	6.28	1.43	4.37	7.3
ENSMUSG00000013076	ENSMUST00000013220	Amotl1	0.699622	1	-0.300378						224	72	2907	57	5826	46	73041	0	-4.19	-19.646	13	0	0	5	0	0	0	0	45.8118	8.37	6.51	2.89	3.2	0.83	9.5	8.68	5.48	3.41	2.69	8.78	5.89	2.27	1.76	7.13	9.71	5.99	0.52	2.38	4.03
ENSMUSG00000013089	ENSMUST00000079601	Etv5	0.649014	-0.193977	0.842991	0.640103	0.625129	0.0149742	-0.828017	0.819106	281	69	1533	54	2161	46	58411	0	-1.731	-2.69	13	0	1	5	0	0	0	2.22	35.7564	5.49	5.49	1.96	5.88	2.16	7.25	6.86	6.27	2.94	1.57	7.84	4.31	2.94	4.9	13.53	7.65	3.33	0.78	4.71	4.12
ENSMUSG00000013150	ENSMUST00000155038	Gfod2	0.52631	0.285268	0.241042	0.575718	0.2817	0.294018	0.0529757	-0.00356753	262	62	480	56	209	60	41214	0	-8.129	-4.429	4	0	0	0	0	0	0	0	36.0759	6.29	5.66	1.89	5.66	3.14	8.81	3.77	8.81	1.26	2.52	11.32	4.4	1.26	1.89	6.92	6.29	6.29	1.26	1.26	11.32
ENSMUSG00000013155	ENSMUST00000212061	Enkd1	-0.0559648	-2.98879	2.93282	0.801828	0.225428	0.5764	-2.35642	3.21422	302	66	618	61	753	57	4560	0	-10.604	-19.646	6	0	0	0	0	0	0	0	44.1176	5.37	12.2	1.95	4.88	2.44	6.83	5.37	8.78	1.46	3.9	10.24	5.85	0.98	0.98	11.71	8.29	2.93	0.49	1.46	3.9
ENSMUSG00000013160	ENSMUST00000013304	Atp6v0d1	0.81765	0.408394	0.409256	0.663947	0.183017	0.48093	0.0716738	-0.225377	135	74	1056	51	438	49	41583	0	-2.461	11.513	8	0	0	0	0	0	0	0	39.1429	8.26	3.99	5.13	5.98	2.28	8.55	3.7	4.56	2.56	6.27	11.97	5.13	1.99	7.12	3.7	3.99	4.27	0.28	5.13	5.13
ENSMUSG00000013236	ENSMUST00000223859	Ptprs	0.272685	0.0970094	0.175675	0.339788	0.381204	-0.041416	-0.217091	0.284195	195	74	4494	57	899	51	64014	0	-6.433	-23.414	28	0	0	0	0	0	0	0	44.7193	6.15	6.28	4.01	4.74	1.34	6.48	5.08	6.81	1.8	5.08	7.21	4.34	2.47	4.07	7.21	6.55	6.68	1.34	3.74	8.62
ENSMUSG00000013275	ENSMUST00000086559	Slc41a1	0.784455	0.68351	0.100946	0.749125	0.72251	0.0266143	-0.0743312	0.0390008	1028	57	1539	58	2130	48	20889	0	-8.794	12.383	11	0	0	1	0	0	0	9.67	34.4423	8.2	3.52	3.13	4.49	1.17	3.71	2.15	9.18	1.95	7.23	12.3	1.95	3.13	4.88	6.84	7.81	5.86	2.15	1.56	8.79
ENSMUSG00000013353	ENSMUST00000013497	4931406B18Rik	0.808782	0.63406	0.174722	0.865219	0.35517	0.510049	0.335327	-0.27889	710	50	1104	47	2156	49	13895	0	-0.086	-7.762	8	0	0	3	0	0	0	5.12	25.6831	4.36	4.09	4.36	2.18	3	5.45	2.72	5.72	2.45	5.72	13.62	4.63	3	2.72	6.27	9.81	7.63	2.18	2.45	7.63
ENSMUSG00000013367	ENSMUST00000107974	Iglon5	1	0.26812	0.73188	0.191314	1	-0.808686	-1.54057	0.73188	52	88	1011	62	1559	57	17172	0	-10.086	-5.299	8	0	0	0	0	0	7	0	43.2836	9.82	8.63	5.06	3.87	2.08	5.06	2.98	6.85	1.49	3.87	11.9	0.6	1.49	2.08	6.55	8.63	6.85	2.08	2.98	7.14
ENSMUSG00000013415	ENSMUST00000013559	Igf2bp1									307	71	1734	54	6337	47	48778	0	-1.794	2.962	15	0	0	10	0	0	1	0	42.5347	9.19	5.03	4.33	2.95	1.04	7.8	7.28	6.93	2.43	7.28	6.24	8.15	1.91	2.43	5.89	6.24	4.85	0.35	2.08	7.63
ENSMUSG00000013418	ENSMUST00000038343	B4galnt2									61	63	1533	49	128	44	48949	0	-0.59	-21.096	11	0	0	0	0	0	0	0	33.5953	4.71	5.29	3.33	5.49	1.18	4.71	4.71	5.49	2.55	4.12	10.98	6.86	1.37	6.08	6.86	4.9	7.06	0.98	4.51	8.82
ENSMUSG00000013419	ENSMUST00000093772	Zfp651	-0.92649	-0.572374	-0.354116	-1.63337	-0.503636	-1.12973	-0.775618	0.0687384	190	84	2190	59	3973	55	11710	0	-10.596	-8.632	6	0	0	1	0	0	0	3.42	48.6264	7.96	5.08	2.88	3.98	3.7	11.39	5.9	7.96	4.53	2.06	7.41	6.04	2.47	3.57	7.13	6.86	4.25	0.41	1.92	4.53
ENSMUSG00000013465	ENSMUST00000059849	Nelfb	0.7548	0.150638	0.604162	0.799617	0.376019	0.423598	-0.180564	0.225381	133	66	1896	55	608	50	11778	1.281	-8.059	-29.646	13	0	0	0	0	0	0	0	38.0952	7.77	5.07	2.06	5.39	1.74	7.92	4.75	5.39	2.54	2.06	16.64	6.18	2.06	4.75	5.39	6.66	5.07	0.48	1.43	6.66
ENSMUSG00000013483	ENSMUST00000106250	Card14									572	54	3000	57	634	53	37608	0	-7.856	2.817	23	0	0	0	0	0	0	18.63	43.0862	6.21	7.81	2.1	5.51	2.3	9.31	6.51	4.8	2.7	3.2	12.61	4.8	3	2.4	3.8	9.01	4.9	1.1	1.8	6.11
ENSMUSG00000013495	ENSMUST00000063272	Tmem175	0.87069	0.536361	0.334329	0.841869	0.63387	0.207999	-0.12633	0.0975085	179	57	1500	53	2277	46	18951	0	-2.517	-2.4	11	0	0	5	0	0	0	4.54	28.5141	9.82	4.01	1	3.81	2.2	3.81	5.81	4.41	4.21	5.61	14.83	2.2	2.81	7.62	5.21	7.01	6.01	1	1.8	6.81
ENSMUSG00000013539	ENSMUST00000115628	Tango2	0.62895	0.172198	0.456752	0.819108	0.496031	0.323077	-0.133675	0.323833	186	70	831	52	605	49	43216	0	-1.755	8.759	9	0	0	0	0	0	0	0	38.5455	6.52	4.71	5.8	5.8	1.81	7.25	3.62	7.61	1.09	4.35	11.23	5.07	1.81	3.99	4.71	6.16	7.25	1.45	4.35	5.43
ENSMUSG00000013584	ENSMUST00000034723	Aldh1a2									58	82	1557	49	649	46	80455	0	-2.174	-12.255	14	0	0	6	0	0	0	0	32.882	9.27	4.44	4.44	4.44	1.74	7.14	4.25	9.07	0.77	6.95	7.14	5.98	2.7	5.21	5.21	5.41	5.21	1.16	2.32	7.14
ENSMUSG00000013593	ENSMUST00000013737	Ndufs2	0.659879	0.160416	0.499463	0.690598	0.259213	0.431385	-0.0680774	0.0987971	34	58	1392	53	197	51	12270	1.332	-3.761	-1.096	13	0	1	0	0	0	0	0	35.7143	7.13	7.13	2.59	5.62	1.51	6.91	3.67	7.56	2.81	6.26	8.64	4.75	4.1	3.67	6.48	4.75	3.89	1.73	4.1	6.7
ENSMUSG00000013622	ENSMUST00000201136	Atraid	0.879379	0.25271	0.626668	0.775085	0.0993203	0.675765	0.0490965	-0.15339	355	53	513	48	26	57	5609	0	-2.2	1.948	7	0	0	0	0	0	0	0	30.1775	6.47	3.53	5.29	6.47	6.47	1.18	8.24	10	0.59	5.29	12.35	4.71	2.35	4.71	5.29	7.06	5.88	1.18	1.18	1.76
ENSMUSG00000013629	ENSMUST00000013773	Cad	0.580687	0.251243	0.329444	0.658854	0.503873	0.154981	-0.174463	0.25263	175	69	6678	56	284	50	23700	0.287	-7.17	-12.69	44	0	0	0	0	0	0	0	37.7248	8.76	5.57	2.56	4.22	2.02	6.92	4.09	7.87	2.83	4.4	10.56	3.96	2.34	3.51	6.56	6.29	5.44	0.9	2.52	8.67
ENSMUSG00000013646	ENSMUST00000116376	Sh3bp5l	0.85104	0.753388	0.0976519	0.840168	0.819273	0.0208946	-0.0767573	0.0658855	506	57	1179	60	1331	53	17005	0.862	-10.663	-13.704	7	0	0	1	0	0	0	5.51	52.1739	9.18	10.2	2.3	3.83	1.02	13.01	7.14	8.93	2.81	2.81	9.69	4.08	1.28	0.77	4.59	7.91	3.83	0.26	1.53	4.85
ENSMUSG00000013662	ENSMUST00000235412	Atad1	0.746738	0.462839	0.283899	0.379558	0.148082	0.231477	-0.052422	-0.314757	79	59	1086	42	2606	36	40694	0.811	5.5	5.426	10	0	1	10	0	0	0	0	20.2778	8.31	4.99	3.32	7.48	1.66	6.09	4.99	3.88	3.05	6.65	10.25	7.76	3.6	3.6	3.88	6.37	4.99	1.11	1.39	6.65
ENSMUSG00000013663	ENSMUST00000013807	Pten	0.774266	0.702446	0.0718203	0.57929	0.611289	-0.0319997	-0.10382	-0.0911562	948	70	1212	39	6132	35	68664	2.481	7.123	11.223	9	0	3	20	0	0	0	11.56	24.6269	4.22	4.96	5.71	8.19	2.48	7.2	3.23	3.72	3.23	4.96	6.7	8.44	2.23	6.2	5.71	5.71	4.96	0.5	5.71	5.96
ENSMUSG00000013698	ENSMUST00000013842	Pea15a	0.748975	0.542399	0.206575	0.593236	0.335507	0.257729	0.0511541	-0.206893	210	73	393	50	1898	49	10077	1.559	0.693	-15.299	4	0	0	4	0	0	0	0	44.9612	4.62	4.62	3.08	6.92	0.77	13.08	2.31	1.54	1.54	9.23	11.54	10	1.54	2.31	5.38	8.46	6.92	0.77	3.08	2.31
ENSMUSG00000013701	ENSMUST00000013845	Timm23	0.948142	0.539431	0.408711	0.90709	0.48376	0.42333	0.0146191	-0.0556712	150	70	630	49	393	39	21737	0.693	-3.918	-51.965	7	0	2	1	0	0	0	0	22.5962	10.05	4.31	5.74	2.87	1.44	3.35	2.87	15.79	0.48	2.87	13.4	3.35	4.31	3.83	2.87	6.22	8.13	1.44	3.35	3.35
ENSMUSG00000013707	ENSMUST00000013851	Tnfaip8l2	0.90454	0.866704	0.0378359	0.830772	0.838353	-0.00758156	-0.0454175	-0.0283509	92	60	555	58	475	54	2840	1.062	-9.601	1.513	2	0	0	0	0	0	0	0	43.1694	8.7	6.52	0	6.52	1.63	7.07	2.72	5.98	4.89	3.26	15.22	7.61	1.63	4.89	2.72	7.61	3.8	0	2.17	7.07
ENSMUSG00000013736	ENSMUST00000057578	Trnt1	0.912254	0.707461	0.204793	0.804613	0.517488	0.287126	0.0823326	-0.189973	117	63	1305	40	861	34	13309	0	4.81	-5.588	9	0	5	1	0	0	0	0	21.2471	5.3	6.22	3.69	6.22	0.69	7.6	4.15	6.68	3.23	5.53	11.52	8.53	2.07	4.84	3.46	5.07	5.53	1.38	2.76	5.53
ENSMUSG00000013787	ENSMUST00000013931	Ehmt2	0.484827	-0.0348765	0.519704	0.683454	0.401152	0.282302	-0.237402	0.436029	3	66	3792	61	231	51	15081	4.448	-12.494	13.832	27	0	1	0	0	2	0	0	47.1474	8.08	7.44	3.17	5.62	3.4	8.95	3.33	8.71	2.85	3.64	8.79	4.28	2.06	2.06	7.36	8.16	4.04	1.03	1.74	5.3
ENSMUSG00000013822	ENSMUST00000166335	Elof1	0.921308	0.704786	0.216523	0.870723	0.791075	0.0796482	-0.136874	0.0862892	246	55	252	51	555	56	1181	0	0.575	3.107	2	0	0	0	0	0	0	0	34.1463	4.82	6.02	3.61	6.02	7.23	7.23	3.61	3.61	1.2	3.61	3.61	9.64	3.61	3.61	7.23	6.02	9.64	1.2	2.41	6.02
ENSMUSG00000013833	ENSMUST00000105378	Med16	0.827352	0.153923	0.67343	0.750293	0.217494	0.532799	-0.140631	0.0635713	26	83	2595	60	576	52	14214	0.556	-10.254	-17.183	15	0	0	0	0	0	0	0	42.2943	6.71	5.44	2.08	5.32	3.59	4.05	3.94	6.37	2.55	3.59	14.24	4.63	2.66	2.66	6.13	9.26	6.02	2.55	1.39	6.83
ENSMUSG00000013846	ENSMUST00000229028	St3gal1	0.555915	0.425194	0.130721	0.732363	0.48383	0.248533	0.117812	0.058636	936	54	1014	53	3782	50	73956	1.2	-3.269	-19.067	9	0	0	6	0	0	0	0	41.0714	3.56	6.23	5.93	4.75	1.78	4.45	2.67	5.93	3.56	5.64	8.9	6.23	2.08	6.53	5.04	5.93	7.42	2.37	3.86	7.12
ENSMUSG00000013858	ENSMUST00000052885	Tmem259	0.235859	-0.0875968	0.323456	0.477672	0.402006	0.0756655	-0.24779	0.489603	199	86	1725	61	301	65	7213	0.944	-9.22	-26.748	11	0	0	1	0	0	0	0	43.63	8.36	5.4	3.31	4.53	0.87	5.57	2.79	7.14	2.61	4.7	11.85	1.57	2.79	6.97	8.19	8.36	4.36	1.22	3.31	6.1
ENSMUSG00000013878	ENSMUST00000014022	Rnf170	0.609571	0.736836	-0.127265	0.704841	0.551376	0.153465	0.28073	-0.18546	277	65	861	42	2791	38	24504	0	3.803	9.774	8	0	3	5	0	0	0	6.57	16.4912	4.55	8.04	2.45	5.24	3.15	4.9	8.04	5.24	1.4	7.69	11.54	0.35	3.15	7.34	3.85	5.59	3.85	1.75	4.2	7.69
ENSMUSG00000013921	ENSMUST00000014065	Clip3									149	62	1644	57	1507	50	16615	0	-6.467	-2.11	14	0	0	2	0	0	0	0	39.9267	8.78	6.4	2.74	5.85	2.19	5.48	4.02	8.23	2.38	2.56	8.59	5.48	2.01	3.66	8.78	6.03	5.85	1.1	1.83	8.04
ENSMUSG00000013928	ENSMUST00000014072	Thap8									311	63	642	57	229	54	10144	0	-6.271	-2.69	4	0	0	0	0	0	0	6.41	33.0189	8.92	5.16	1.88	2.82	2.35	4.23	3.29	8.45	2.82	3.29	12.21	2.35	1.88	3.29	11.27	8.92	7.04	3.76	1.41	4.69
ENSMUSG00000013936	ENSMUST00000111751	Myl2									44	61	501	49	344	50	12490	0	2.652	3.977	8	0	0	0	0	0	0	0	41.2121	7.23	3.61	5.42	7.83	0	10.84	3.61	6.63	1.2	6.63	5.42	9.64	4.22	8.43	4.22	3.01	6.02	0	1.2	4.82
ENSMUSG00000013973	ENSMUST00000111300	Dedd	0.934609	0.773373	0.161236	0.898366	0.695939	0.202427	0.0411906	-0.077434	479	66	957	54	1127	47	13187	0	-2.283	-12.545	6	1	0	1	0	0	0	24.62	37.224	4.4	10.69	2.83	6.6	2.52	6.6	5.35	5.03	2.83	4.4	12.26	5.35	1.26	3.46	5.66	5.66	5.03	0.63	2.83	6.6
ENSMUSG00000013974	ENSMUST00000014118	Mcemp1									28	42	552	48	914	48	3506	0	0.736	18.614	7	0	0	2	0	0	0	0	34.6154	7.65	3.83	4.92	4.92	0.55	6.01	6.56	2.73	1.64	4.92	11.48	9.84	2.73	1.64	4.92	8.2	8.2	2.19	1.64	5.46
ENSMUSG00000013997	ENSMUST00000111295	Nit1	0.782226	0.351184	0.431042	0.819447	0.567541	0.251906	-0.179136	0.216357	76	60	972	52	287	39	3402	0	-1.948	-0.371	7	0	0	0	0	0	0	0	29.5031	8.05	6.5	2.48	2.48	4.02	5.88	5.57	8.05	3.72	3.1	12.38	2.79	1.86	3.1	7.43	6.5	5.57	1.55	3.1	5.88
ENSMUSG00000014030	ENSMUST00000014174	Pax5	0.102879	0.317691	-0.214811	0.405484	0.461432	-0.0559481	0.158863	0.143741	79	36	1176	56	6749	48	185731	0	-4.544	2.093	10	0	1	6	0	0	6	0	41.0256	6.14	6.65	3.07	4.86	0.77	3.84	4.86	8.95	2.3	5.12	5.63	3.58	1.53	2.05	10.23	11.25	6.91	0.51	4.35	7.42
ENSMUSG00000014039	ENSMUST00000142295	Prdm15	0.412968	-0.00879921	0.421767	0.459809	0.215373	0.244437	-0.17733	0.224172	24	49	1425	53	4174	48	59907	0	-5.533	9.194	23	0	0	4	0	0	0	0	38.6892	6.54	7.38	2.11	4.43	3.38	8.23	3.59	5.49	3.8	2.74	6.96	7.59	2.95	3.38	6.54	10.13	5.06	1.27	1.69	6.75
ENSMUSG00000014074	ENSMUST00000014218	Rnf168	0.875137	0.786392	0.0887448	0.807709	0.71592	0.091789	0.00304422	-0.0704718	654	63	1698	43	1580	40	23446	0.831	6.237	8.904	6	0	1	4	0	0	0	0	26.773	3.89	7.26	5.13	4.78	3.19	12.39	6.55	3.19	1.42	4.07	7.43	7.61	1.42	1.95	5.31	10.27	6.37	0.71	2.12	4.96
ENSMUSG00000014075	ENSMUST00000014220	Tctex1d2	1	0.516989	0.483011						107	59	435	46	296	27	9398	0	-0.033	-9.357	5	0	0	1	0	0	0	0	25.8741	6.25	5.56	2.78	6.94	2.78	8.33	3.47	5.56	2.08	3.47	7.64	5.56	4.17	6.25	3.47	7.64	3.47	0.69	4.86	9.03
ENSMUSG00000014077	ENSMUST00000119172	Chp1	0.516217	0.417008	0.0992083	0.531356	0.417526	0.11383	0.0146213	0.000517663	130	66	576	49	2321	43	39295	0.632	0.48	-14.574	6	0	0	7	0	0	0	0	37.8947	4.19	7.85	4.71	9.42	0.52	8.9	3.66	5.76	1.57	6.81	10.47	4.71	2.09	8.38	3.14	8.38	4.19	0	1.57	3.66
ENSMUSG00000014158	ENSMUST00000071968	Trpv4	0.51451	0.220544	0.293967	0.768491	0.584473	0.184017	-0.109949	0.36393	111	70	2616	57	501	59	36270	0	-6.167	-3.704	16	0	0	2	0	0	0	0	42.5287	5.97	5.86	4.36	5.74	1.49	5.28	2.41	6.66	1.84	4.48	11.83	5.05	2.3	5.28	6.08	7	5.63	1.26	4.13	7.35
ENSMUSG00000014164	ENSMUST00000160860	Klhl3	-0.175221	-0.120106	-0.0551144	0.344033	0.012943	0.33109	0.386204	0.133049	437	60	1764	56	4948	48	113365	0	-7.932	-5.878	15	0	0	5	0	0	3	0	41.2969	8.18	5.28	4.26	5.45	2.56	6.98	3.75	6.98	1.87	3.24	9.2	4.77	3.24	2.56	3.75	6.81	5.45	1.19	3.92	10.56
ENSMUSG00000014177	ENSMUST00000014321	Tvp23b	0.641513	0.24834	0.393173	0.433358	0.166863	0.266495	-0.126678	-0.0814777	129	65	618	47	1037	35	15731	0	-2.981	-20.226	7	0	0	3	0	0	0	0	25	5.85	5.37	3.9	4.88	2.44	4.39	2.93	5.37	1.95	5.37	10.73	5.37	2.44	6.83	1.95	10.24	5.37	3.41	1.95	9.27
ENSMUSG00000014195	ENSMUST00000014339	Dnajc7	0.444868	0.140939	0.303929	0.580543	0.293471	0.287071	-0.016858	0.152532	564	62	1485	47	281	44	37351	0.289	2.455	-11.386	14	0	0	0	0	0	0	6.77	33.4686	12.35	5.67	5.26	7.09	2.83	9.51	3.85	5.26	1.82	2.63	7.49	9.92	3.04	5.26	2.02	3.44	3.04	0	5.47	4.05
ENSMUSG00000014198	ENSMUST00000103119	Zfp385c	1	0.728	0.272	1	0.743419	0.256581	-0.0154196	0.0154196	187	58	1290	60	1289	51	23151	0	-6.264	-6.748	8	0	0	2	0	0	0	0	39.7196	11.66	5.83	3.03	1.86	2.33	2.33	3.96	8.86	4.43	1.4	10.26	6.06	0.93	2.56	13.05	10.26	5.59	0.23	0.7	4.66
ENSMUSG00000014226	ENSMUST00000014370	Cacybp	0.748198	0.458884	0.289314	0.489729	0.251743	0.237986	-0.0513284	-0.20714	208	71	690	40	1200	34	10509	0	7.828	-18.052	6	0	1	5	0	0	0	0	26.3158	3.49	3.93	5.24	6.55	0.87	10.92	3.93	2.62	0.87	4.37	8.73	13.97	2.18	1.75	3.06	6.99	7.86	1.31	3.06	8.3
ENSMUSG00000014232	ENSMUST00000040881	Cluap1	0.249047	-0.289367	0.538415	0.694042	0.340181	0.353862	-0.184553	0.629548	307	58	1242	46	230	43	32323	0.687	1.6	-10.806	12	0	0	0	0	0	0	7.61	33.9806	6.78	7.26	3.87	9.69	0	13.08	4.36	3.39	0.97	5.08	10.65	8.47	3.87	3.15	2.91	6.3	3.63	0.24	2.42	3.87
ENSMUSG00000014243	ENSMUST00000072916	Zswim7	0.0112555	0.0518706	-0.0406151	-1.14358	-1.24862	0.105038	0.145653	-1.30049	43	71	459	52	230	49	14152	0	-9.25	-31.965	5	0	1	0	0	0	0	0	30.4636	9.21	5.92	0.66	5.26	3.95	5.92	3.95	3.95	1.97	3.29	15.79	3.95	1.97	2.63	2.63	13.16	5.26	0.66	2.63	7.24
ENSMUSG00000014294	ENSMUST00000014438	Ndufa2	0.41497	-0.106054	0.521024	0.4489	0.202766	0.246133	-0.274891	0.308821	37	47	300	58	235	43	2226	0.532	-11.421	-5.154	3	0	0	0	0	0	0	0	43.8776	13.13	9.09	4.04	2.02	2.02	6.06	6.06	6.06	2.02	4.04	10.1	6.06	2.02	2.02	4.04	7.07	2.02	1.01	2.02	9.09
ENSMUSG00000014301	ENSMUST00000014445	Pam16	0.799932	0.426063	0.373868	0.9422	0.601649	0.340551	-0.0333176	0.175586	135	66	378	54	83	45	8525	0	-5.087	-12.4	5	0	1	1	0	0	0	0	41.9355	14.4	7.2	3.2	3.2	0	8	10.4	6.4	1.6	3.2	8.8	8	1.6	3.2	1.6	8	0.8	0	2.4	8
ENSMUSG00000014303	ENSMUST00000014447	Glis2	0.644917	0.597855	0.0470614	0.393485	1	-0.606515	-0.653576	0.402145	272	76	1566	59	1781	52	21245	0	-7.146	9.919	7	0	0	0	0	0	0	1.81	40.1923	5.37	5.57	3.45	4.41	2.69	4.22	2.11	10.36	4.41	1.92	13.44	5.37	0.58	2.88	13.05	9.21	3.07	0.58	2.11	5.18
ENSMUSG00000014313	ENSMUST00000014457	Cox6c	0.496038	0.316938	0.179099	0.210769	0.0107828	0.199986	0.0208867	-0.306156	135	57	231	49	137	36	6271	0.542	-8.54	-4.429	4	0	0	0	0	0	0	0	29.3333	17.11	7.89	1.32	2.63	0	5.26	2.63	7.89	1.32	3.95	7.89	10.53	5.26	6.58	3.95	5.26	0	0	5.26	5.26
ENSMUSG00000014329	ENSMUST00000143791	Bicc1									84	84	2934	53	2413	41	236869	0	-0.901	-32.545	21	0	0	8	0	0	1	0	38.5246	8.29	4.2	4.5	3.79	1.23	5.63	4.61	7.16	2.76	4.09	9.62	6.24	3.17	2.25	6.55	12.49	6.14	0.61	1.64	5.02
ENSMUSG00000014349	ENSMUST00000100528	Ube2z	0.906667	0.693195	0.213471	0.877957	0.685145	0.192812	-0.0206593	-0.00805091	114	73	1071	57	2812	48	17957	1.724	-9.596	-13.849	7	0	1	2	1	0	0	0	41.4085	8.15	4.78	3.09	5.06	2.25	6.18	2.53	10.96	3.09	3.65	7.87	3.09	3.37	4.21	9.27	7.58	5.34	1.4	2.81	5.34
ENSMUSG00000014353	ENSMUST00000110325	Tmem87b	0.717827	0.588312	0.129515	0.646607	0.527133	0.119474	-0.0100415	-0.0611791	221	67	1668	42	2918	41	36144	0	1.447	-24.284	19	0	3	7	0	0	0	0	20.3971	6.85	4.14	3.42	5.41	2.16	5.41	1.98	4.32	1.8	7.75	10.99	5.05	3.24	5.77	3.06	8.65	5.95	3.06	2.52	8.47
ENSMUSG00000014355	ENSMUST00000014499	Anapc1	0.701239	0.253027	0.448212	0.762295	0.33146	0.430836	-0.0173768	0.0784326	263	59	5835	46	2844	43	77288	2.28	0.552	5.136	48	0	9	3	0	0	0	6.28	26.0937	6.69	4.17	3.81	4.48	2.16	6.02	4.12	5.45	3.45	4.22	12.81	4.22	2.88	3.45	6.07	9.83	4.99	1.29	3.09	6.84
ENSMUSG00000014361	ENSMUST00000014505	Mertk									90	66	2985	49	1227	41	103939	1.551	-0.042	-12.4	19	0	2	1	0	0	0	0	30.4129	5.84	3.92	5.13	4.63	1.91	6.94	3.62	6.34	2.72	6.54	9.96	4.33	2.11	3.42	6.44	9.15	5.23	1.71	2.72	7.34
ENSMUSG00000014402	ENSMUST00000014546	Tsg101	0.754718	0.587123	0.167595	0.724641	0.681793	0.042848	-0.124747	0.09467	107	78	1176	44	666	34	31021	0	2.905	-25.733	10	0	0	1	0	0	0	0	20.5128	5.63	4.86	4.09	5.37	0.77	6.91	3.32	5.12	1.28	6.14	9.72	6.91	3.32	1.79	8.7	7.67	5.88	0.77	5.88	5.88
ENSMUSG00000014418	ENSMUST00000014562	Hps5	0.586472	0.128911	0.45756	0.561869	0.0852096	0.476659	0.0190988	-0.0437019	648	62	3381	48	924	40	35562	0.739	-1.015	2.383	23	0	2	2	0	0	0	2.23	27.6444	6.66	6.04	2.04	5.24	2.75	8.44	4	4.88	2.66	4.09	13.59	4.8	1.24	4	5.06	10.12	5.15	1.69	1.78	5.77
ENSMUSG00000014426	ENSMUST00000089058	Map3k4	0.553446	0.20165	0.351796	0.684355	0.326164	0.35819	0.00639416	0.124514	168	72	4794	54	479	49	91176	2.294	-3.339	-10.806	27	0	1	1	0	0	0	0	38.6591	7.51	6.64	3.07	5.32	1.94	8.83	4.51	5.89	2.44	4.7	9.71	6.07	2.82	3.38	5.76	7.58	4.82	1.25	2.38	5.39
ENSMUSG00000014444	ENSMUST00000067252	Piezo1	0.420569	0.0112518	0.409317	0.633754	0.499725	0.134029	-0.275289	0.488473	291	79	7641	57	284	55	69632	0	-7.395	-34.864	51	0	2	1	0	0	0	3.62	40	6.76	6.36	2.28	4.2	2.24	5.73	5.03	5.03	2.59	4.75	14.3	3.61	2.55	5.26	5.5	5.85	5.26	2.32	3.57	6.79
ENSMUSG00000014470	ENSMUST00000014614	Rnf166	0.494743	0.0628198	0.431923	0.766156	0.347814	0.418342	-0.0135812	0.284994	47	84	714	61	1022	52	9918	0	-7.59	-47.472	6	0	0	2	0	0	0	0	46.1864	8.86	4.64	3.38	3.8	7.17	4.22	5.91	4.22	3.8	2.95	8.02	5.49	2.11	4.22	9.7	9.28	2.53	0.42	2.53	6.75
ENSMUSG00000014496	ENSMUST00000014640	Ankrd28	0.545518	0.382752	0.162766	0.404086	0.33126	0.0728257	-0.0899402	-0.0514922	298	75	3162	44	3252	37	131884	0	2.672	-15.009	28	0	2	8	1	0	0	0	21.8631	11.87	3.51	6.55	6.65	2.85	4.37	2.85	7.12	4.46	3.89	12.44	4.56	1.8	2.18	3.23	6.84	5.7	0.47	2.37	6.27
ENSMUSG00000014498	ENSMUST00000014642	Ankrd52	0.423176	0.328464	0.0947121	0.568966	0.612011	-0.043045	-0.137757	0.283547	104	85	3231	56	3285	52	16888	4.013	-6.678	-14.139	28	0	1	5	0	0	0	0	37.1163	13.48	4.83	4.65	5.76	2.97	5.11	2.51	7.34	4.93	2.79	14.13	3.62	1.58	2.32	3.62	6.6	5.58	0.46	2.04	5.67
ENSMUSG00000014504	ENSMUST00000072576	Srp19	0.893834	0.686341	0.207494	0.879949	0.801023	0.0789258	-0.128568	0.114683	74	68	435	46	367	32	5455	0.876	1.349	-34.864	5	0	1	1	0	0	0	0	32.8671	9.03	7.64	4.17	4.17	2.78	5.56	6.25	6.94	0	4.86	6.25	11.81	2.78	2.78	4.86	6.94	3.47	0.69	2.78	6.25
ENSMUSG00000014529	ENSMUST00000014673	Tmbim7									387	42	909	44	256	38	22413	0	2.362	-2.545	11	1	0	1	0	0	0	8.74	18.9369	7.28	4.3	3.97	3.97	0.99	4.3	3.31	4.97	1.99	9.93	12.25	1.99	2.65	6.95	3.31	5.96	5.63	1.66	4.3	10.26
ENSMUSG00000014543	ENSMUST00000014687	Klra17									154	43	822	38	214	45	45517	0	2.669	5.571	8	0	0	0	0	0	0	0	20.5882	2.2	3.3	6.59	3.66	4.76	8.42	4.4	4.4	3.66	5.49	10.26	9.16	2.2	3.3	2.93	9.16	4.4	2.56	4.03	5.13
ENSMUSG00000014547	ENSMUST00000014691	Wdfy2	0.12688	-0.167465	0.294345	0.402097	0.129931	0.272166	-0.0221788	0.297396	243	70	1203	52	5200	44	123832	0.817	-4.232	-20.081	12	0	0	10	0	0	0	0	33.584	4.25	5.5	2.5	5.75	3.5	6	5.75	7.5	4	5	7	5	2.75	3.75	3.75	9	6	3	1.5	8.5
ENSMUSG00000014550	ENSMUST00000014694	Rbsn	0.93527	0.812807	0.122463	0.907261	0.826025	0.0812355	-0.0412278	0.0132185	384	59	2352	51	2598	45	28214	0.803	-1.881	-17.617	12	0	0	1	0	0	0	11.68	37.9795	6.77	6.51	3.19	6.64	1.92	10.47	6.39	4.73	2.3	3.7	10.73	6.51	2.04	2.55	6.51	7.92	4.34	0.51	2.04	4.21
ENSMUSG00000014551	ENSMUST00000140438	Mrps25	0.655578	0.514531	0.141047	0.66424	0.604615	0.0596249	-0.081422	0.0900848	60	66	516	52	5497	43	14509	0	-3.432	-12.835	4	0	0	10	0	0	0	0	44.1176	2.34	5.85	4.09	1.75	2.34	9.94	4.68	7.6	1.17	4.68	7.6	10.53	5.26	5.85	7.02	2.92	4.68	0.58	4.09	7.02
ENSMUSG00000014554	ENSMUST00000014698	Dguok	0.565047	-0.25367	0.818717	0.611618	0.0164163	0.595201	-0.223516	0.270087	80	66	834	52	193	45	26753	0	-4.524	-14.139	7	0	0	0	0	0	0	0	35.8696	7.94	7.94	3.97	3.61	0.72	8.3	6.86	5.05	3.61	3.97	12.27	3.97	3.25	5.42	3.61	5.78	3.61	2.17	2.89	5.05
ENSMUSG00000014592	ENSMUST00000049790	Camta1	0.55935	0.691724	-0.132374	0.444526	0.365313	0.0792135	0.211588	-0.326411	77	83	5049	57	3297	37	802221	2.582	-6.014	-37.328	24	0	1	10	0	0	0	0	45.2112	8.2	5.05	3.21	3.57	2.2	6.54	5.65	6.36	3.15	3.69	8.09	5.29	2.62	2.56	6.06	12.13	5.89	1.31	2.62	5.83
ENSMUSG00000014599	ENSMUST00000014743	Csf1	0.836744	0.894544	-0.0577997	0.673552	0.697294	-0.0237426	0.0340571	-0.197249	406	64	1659	54	2111	51	19422	0	-2.739	-26.603	9	0	0	4	0	0	0	4.72	41.0163	5.98	5.25	4.35	5.8	2.17	7.97	5.25	5.8	2.54	3.44	9.78	4.35	1.27	3.08	8.88	10.33	6.88	1.27	0.72	4.89
ENSMUSG00000014601	ENSMUST00000064759	Strip1	0.913544	0.353795	0.559749	0.920626	0.44713	0.473495	-0.086254	0.0933357	14	63	2514	54	687	53	19163	1.541	-4.204	0.933	21	0	0	0	0	0	0	0	42.1053	7.77	5.73	4.66	5.26	1.55	8.36	4.42	4.06	2.15	4.3	12.07	6.33	3.23	3.82	6.57	5.73	4.3	1.55	2.87	5.26
ENSMUSG00000014602	ENSMUST00000171796	Kif1a									119	61	5094	56	2993	51	86359	0	-4.784	-8.487	48	0	1	1	0	0	0	0	41.0967	6.78	7.48	3.77	5.3	1.59	8.78	3.89	5.3	2.24	4.24	9.25	4.89	2.53	3.3	5.72	8.37	5.83	1	3.3	6.42
ENSMUSG00000014606	ENSMUST00000014750	Slc25a11	0.637054	0.373146	0.263908	0.57631	0.37017	0.206141	-0.0577675	-0.00297631	196	69	945	54	570	46	2863	0	-5.644	-15.878	8	0	1	1	0	0	0	0	32.9073	9.87	6.37	2.55	3.18	0.96	3.18	2.87	10.51	0.96	4.14	11.15	5.73	3.82	5.41	4.46	5.41	8.6	0.64	3.82	6.37
ENSMUSG00000014609	ENSMUST00000102556	Chrne	0.832307	0.683679	0.148629	0.392458	0.251631	0.140827	-0.00780195	-0.432047	19	52	1482	52	90	51	4312	0	-2.05	1.803	12	0	0	0	0	0	0	0	31.7073	6.9	5.48	4.26	4.67	2.43	6.49	2.84	6.49	1.42	6.9	12.37	2.23	1.01	4.26	6.09	5.68	6.49	1.83	3.65	8.52
ENSMUSG00000014633	ENSMUST00000128304	Cmc2	0.716551	-0.289341	1.00589	0.567423	0.141997	0.425426	-0.580467	0.431339	41	63	300	53	53	44	31734	0	-4.192	-3.125	3	0	0	0	0	0	0	0	32.6531	5.05	6.06	4.04	4.04	4.04	4.04	4.04	12.12	4.04	2.02	14.14	6.06	1.01	2.02	8.08	6.06	5.05	2.02	1.01	5.05
ENSMUSG00000014668	ENSMUST00000014812	Chfr	0.464218	0.181694	0.282524	0.574752	0.264045	0.310706	0.0281829	0.0823513	86	66	1992	50	1068	41	36113	0.642	-0.915	-13.559	18	0	1	4	0	0	0	0	29.7583	4.68	5.28	3.92	5.58	5.28	7.84	5.58	5.73	2.26	3.02	10.56	4.68	1.96	2.11	6.79	9.95	6.03	1.06	2.71	4.98
ENSMUSG00000014686	ENSMUST00000014830	Ceacam16	-0.201511	1	-1.20151						148	57	1281	59	206	64	9203	0	-8.825	10.064	6	0	0	0	0	0	0	0	41.4118	8.69	4.69	3.99	3.52	1.64	5.63	3.29	7.98	2.11	3.05	11.03	2.82	2.35	2.11	6.81	6.81	8.92	2.35	3.52	8.69
ENSMUSG00000014748	ENSMUST00000014892	Tex261	0.659751	0.412112	0.24764	0.564106	0.333439	0.230667	-0.0169727	-0.0786733	90	83	591	51	2303	51	6929	0	-0.083	-23.27	6	0	0	1	0	0	0	0	26.6667	6.63	2.55	2.55	1.02	1.02	4.59	2.55	5.61	0.51	8.16	12.24	3.06	3.06	11.73	4.08	7.14	5.61	2.04	6.63	9.18
ENSMUSG00000014763	ENSMUST00000055352	Fam120b	0.72919	0.619618	0.109573	0.794461	0.621899	0.172562	0.0629891	0.00228152	376	58	2361	49	1683	43	37237	0	0.584	-2.4	11	0	4	0	0	0	0	0	30.3185	4.71	4.83	3.56	4.07	3.69	7.51	5.6	6.23	2.54	4.07	10.81	5.47	2.93	3.69	5.22	8.02	4.83	1.78	3.94	6.49
ENSMUSG00000014767	ENSMUST00000014911	Tbp	0.854249	0.714695	0.139554	0.780401	0.634574	0.145828	0.00627335	-0.0801215	296	52	951	46	644	37	17540	1.519	5.183	6.441	9	0	1	3	0	0	0	6.7	27.9365	8.23	4.75	3.16	1.27	0.95	4.11	11.08	6.01	0.63	6.33	8.54	4.75	3.16	4.11	9.18	7.28	8.23	0	2.85	5.38
ENSMUSG00000014769	ENSMUST00000014913	Psmb1	0.678281	0.350681	0.3276	0.647898	0.290023	0.357875	0.0302747	-0.0606583	36	60	723	49	999	39	23278	0.486	-2.161	-8.777	6	0	0	5	0	0	0	0	27.6151	8.33	6.25	2.92	6.25	1.67	5	2.08	9.17	2.08	5.83	8.33	5.42	3.33	4.58	3.75	7.5	6.25	0	4.58	6.67
ENSMUSG00000014771	ENSMUST00000054450	Pdcd2	0.925797	0.387871	0.537926	0.967983	0.445875	0.522108	-0.0158184	0.0580039	28	70	1032	53	60	18	5727	0	-6.496	-9.791	6	0	0	0	0	0	0	0	34.5029	8.16	5.54	1.75	4.66	5.54	9.62	4.08	7.29	2.92	4.08	9.33	4.66	2.04	4.96	7.87	5.54	3.5	1.75	2.04	4.66
ENSMUSG00000014773	ENSMUST00000014917	Dll1									736	59	2169	58	676	36	8623	0	-8.064	-15.299	11	0	0	3	0	0	0	2.68	43.2732	5.4	5.26	4.02	6.09	9.42	5.4	3.74	10.39	2.63	1.8	6.37	4.29	1.11	3.6	7.06	7.48	5.54	1.11	3.46	5.82
ENSMUSG00000014776	ENSMUST00000014920	Nol3	0.0988666	-0.437028	0.535895	-1.47993	-0.585467	-0.89446	-1.43035	-0.148439	476	60	663	63	2037	50	5800	0	-11.115	-1.965	4	0	0	0	0	0	0	0	47.032	6.82	6.82	1.36	5.91	1.82	21.36	5.45	5.91	0.91	0.45	8.64	0.91	1.36	0.45	15.91	5	4.09	1.36	1.36	4.09
ENSMUSG00000014778	ENSMUST00000014922	Fhod1	0.538678	-0.0475098	0.586188	0.660087	0.45757	0.202517	-0.383671	0.50508	100	61	3594	58	234	43	18791	0	-7.649	-6.168	22	0	0	0	0	0	0	0	39.3813	9.19	7.1	2.34	4.51	1.84	7.52	3.59	6.68	1.5	2.42	12.11	3.84	1.5	2.92	9.19	9.02	6.18	0.5	1.75	6.27
ENSMUSG00000014782	ENSMUST00000159286	Plekhg4				0.393485	0.5735	-0.180015			127	56	894	57	3814	55	7956	0	-10.926	-2.53	19	0	0	1	0	0	0	0	35.473	7.41	5.72	1.68	4.38	2.02	5.72	5.05	11.11	2.36	2.02	15.82	2.02	1.35	1.68	9.43	10.77	3.37	2.02	1.68	4.38
ENSMUSG00000014786	ENSMUST00000073149	Slc9a5	0.542469	0.699959	-0.15749	-1.50183	-0.75071	-0.751121	-0.593632	-1.45067	534	65	2697	57	268	60	19901	0	-8.32	-18.777	16	0	0	0	0	0	0	35.7	39.5764	8.24	5.01	2.12	4.34	1.45	5.57	3.67	6.57	2.45	4.57	12.69	4.68	1.56	4.68	5.57	8.02	5.79	1.67	2.45	8.91
ENSMUSG00000014791	ENSMUST00000212033	Elmo3	0.659754	0.438237	0.221517	0.672248	0.685039	-0.0127906	-0.234308	0.246802	139	65	2112	55	100	44	4365	0	-6.551	-17.472	19	0	0	0	0	0	0	0	40.5983	6.69	6.69	3.13	4.69	1.85	8.11	5.83	4.41	2.56	3.13	16.07	4.55	3.13	3.56	5.97	6.69	4.69	0.85	2.28	5.12
ENSMUSG00000014791	ENSMUST00000212033	Elmo3	0.659754	0.438237	0.221517	0.672248	0.685039	-0.0127906	-0.234308	0.246802	139	65	2112	55	100	44	4365	0	-6.551	-17.472	19	0	0	0	0	0	0	0	40.5983	6.69	6.69	3.13	4.69	1.85	8.11	5.83	4.41	2.56	3.13	16.07	4.55	3.13	3.56	5.97	6.69	4.69	0.85	2.28	5.12
ENSMUSG00000014791	ENSMUST00000109375	Elmo3	0.659754	0.438237	0.221517	0.672248	0.685039	-0.0127906	-0.234308	0.246802	143	63	2163	55	883	47	5152	0	-6.451	-17.472	20	0	0	2	0	0	0	0	40.612	6.67	6.67	3.33	4.58	1.94	8.06	5.69	4.44	2.5	3.33	16.11	4.58	3.06	3.47	5.97	6.81	4.72	0.83	2.22	5
ENSMUSG00000014791	ENSMUST00000109375	Elmo3	0.659754	0.438237	0.221517	0.672248	0.685039	-0.0127906	-0.234308	0.246802	143	63	2163	55	883	47	5152	0	-6.451	-17.472	20	0	0	2	0	0	0	0	40.612	6.67	6.67	3.33	4.58	1.94	8.06	5.69	4.44	2.5	3.33	16.11	4.58	3.06	3.47	5.97	6.81	4.72	0.83	2.22	5
ENSMUSG00000014813	ENSMUST00000014957	Stc1				0.922044	0.834381	0.0876635			152	44	744	52	3301	39	12567	0	-3.058	12.238	4	0	0	8	0	0	0	0	37.3984	10.12	7.29	6.07	4.86	4.45	6.07	4.86	3.24	2.43	5.67	8.5	5.26	2.02	3.64	2.83	9.72	4.86	0	2.02	6.07
ENSMUSG00000014837	ENSMUST00000014981	4931428F04Rik	0.277295	0.425757	-0.148462	0.636514	0.666947	-0.0304334	0.118028	0.24119	517	59	1404	57	1571	49	9456	0	-7.668	1.368	7	0	0	2	0	0	0	4.3	42.0601	6	7.07	3	3.43	1.28	6.64	7.92	7.07	3.43	3	10.49	3.85	3.43	3	6.42	7.49	5.35	1.5	4.28	5.35
ENSMUSG00000014846	ENSMUST00000014990	Tppp3	0.725217	0.859326	-0.134109	0.702742	1	-0.297258	-0.163149	0.140674	253	65	531	55	343	58	4034	0	-4.387	-16.023	4	0	0	1	0	0	0	0	54.8571	12.5	3.41	2.84	7.95	1.7	6.82	1.7	10.23	1.14	5.11	3.98	15.34	1.14	3.98	1.14	6.25	5.68	0.57	2.84	5.68
ENSMUSG00000014850	ENSMUST00000191550	Msh3	0.28899	0.072011	0.216979	0.262837	-0.0555719	0.318409	0.10143	-0.127583	99	73	480	51	3675	43	143118	0	-0.142	-17.907	25	0	0	6	0	0	0	0	37.9747	6.92	11.32	3.77	2.52	1.89	5.03	2.52	8.18	1.89	4.4	9.43	8.81	1.26	3.77	7.55	11.32	4.4	0	0	5.03
ENSMUSG00000014852	ENSMUST00000102891	Adamts13									44	51	4281	57	181	48	36136	0	-10.509	-3.27	29	0	0	0	0	0	0	0	36.5614	7.29	6.31	1.96	4.84	5.75	5.12	5.96	8.56	2.88	2.88	9.05	2.31	1.61	2.66	6.87	9.26	6.24	2.31	1.82	6.31
ENSMUSG00000014856	ENSMUST00000153146	Tmem208	0.747893	0.296526	0.451368	0.657047	0.39183	0.265218	-0.18615	0.0953042	107	55	303	52	391	54	2694	0.117	-8.601	-8.777	6	0	0	0	0	0	0	0	35.3535	11	3	3	3	1	6	2	10	1	4	9	6	8	7	1	11	3	2	5	4
ENSMUSG00000014859	ENSMUST00000015003	E2f4	0.772583	0.343635	0.428948	0.827037	0.612705	0.214332	-0.214616	0.269071	78	78	1233	56	682	51	7708	0.6	-2.979	-60.501	10	0	0	3	0	0	0	0	38.6308	5.85	2.93	2.44	5.37	1.71	8.05	4.88	5.61	1.22	4.39	11.95	5.12	0.98	1.46	10.73	13.41	5.37	0.73	1.22	6.59
ENSMUSG00000014867	ENSMUST00000015011	Surf4	0.76376	0.353826	0.409935	0.533916	0.331394	0.202522	-0.207413	-0.0224314	606	70	810	52	1865	50	13889	0.839	-4.363	-13.414	6	0	0	2	4	0	0	5.4	31.7164	6.69	3.35	2.6	4.09	1.49	2.97	4.46	8.18	1.12	5.58	15.99	4.09	4.83	8.18	2.23	5.95	5.2	2.6	3.35	7.06
ENSMUSG00000014873	ENSMUST00000015017	Surf2	0.925972	0.531149	0.394823	0.87831	0.411203	0.467107	0.0722843	-0.119946	59	65	774	52	370	43	3817	0	1.354	-7.907	6	0	0	1	0	0	0	0	44.1406	3.11	9.34	2.72	5.84	1.95	9.34	5.84	3.89	5.06	0.78	10.51	9.73	0.78	4.67	7	7.78	5.45	0.39	3.11	2.72
ENSMUSG00000014905	ENSMUST00000015049	Dnajb9	0.942693	0.861712	0.0809817	0.931231	0.900169	0.031062	-0.0499197	0.0384573	397	66	669	39	1395	32	4768	0	6.33	-8.342	3	0	2	4	0	0	0	0	25.3394	5.41	5.86	5.86	6.31	1.35	5.86	5.41	6.76	4.95	3.6	3.6	7.21	3.15	10.81	2.25	9.01	7.21	0	2.7	2.7
ENSMUSG00000014907	ENSMUST00000118009	Naf1	0.932022	0.556198	0.375824	0.663353	0.534756	0.128596	-0.247227	-0.0214416	150	69	1794	55	1046	31	30348	0	-3.5	-50.516	8	0	1	3	0	0	0	4.55	34.396	6.03	4.52	4.02	6.37	0.17	5.7	3.35	7.87	2.01	2.51	5.53	4.02	1.68	3.69	22.45	11.89	2.01	1.01	1.84	3.35
ENSMUSG00000014932	ENSMUST00000072311	Yes1	0.536036	0.511064	0.0249715	0.166166	0.366793	-0.200627	-0.225599	-0.144272	662	69	1626	41	2298	31	75874	0	4.291	2.672	12	0	3	6	0	0	0	3.43	16.6667	6.65	4.62	3.51	4.44	1.48	7.76	3.51	8.32	1.66	5.18	8.13	6.84	2.59	3.88	5.55	6.47	7.02	1.85	4.62	5.91
ENSMUSG00000014956	ENSMUST00000015100	Ppp1cb	0.763745	0.467871	0.295874	0.378825	0.11377	0.265056	-0.0308182	-0.354101	513	71	984	42	4465	36	36681	1.601	1.551	-4.429	8	1	3	11	1	0	0	0	19.6319	4.59	6.42	3.98	7.03	4.28	6.42	3.36	7.95	1.53	5.81	11.31	5.81	2.14	5.81	5.5	4.59	3.98	0.92	3.67	4.89
ENSMUSG00000014959	ENSMUST00000028509	Gorasp2	0.839708	0.445986	0.393722	0.811135	0.452235	0.358901	-0.0348217	0.00624911	122	75	1356	54	760	44	30168	0	-2.292	-18.487	10	0	0	2	0	0	0	0	30.8889	6.21	2.44	4.43	4.21	0.89	5.76	1.77	8.65	1.55	3.77	11.53	3.1	2.44	2.44	12.86	12.64	5.99	0.67	1.55	7.1
ENSMUSG00000014980	ENSMUST00000162371	Tsen15	0.88175	0.438959	0.442791	0.837613	0.498337	0.339277	-0.103515	0.0593781	8	99	387	50	36	46	15388	0	-3.348	9.194	4	0	1	0	0	0	0	0	29.1339	5.47	2.34	1.56	6.25	3.91	9.38	2.34	9.38	3.13	6.25	10.16	2.34	3.91	1.56	8.59	7.03	5.47	3.13	2.34	5.47
ENSMUSG00000015002	ENSMUST00000173858	Efr3a	0.385075	0.171182	0.213893	0.194081	0.0626417	0.131439	-0.082454	-0.10854	196	74	2466	44	186	42	82211	1.61	2.2	-25.154	23	0	2	1	0	0	0	0	24.7561	6.94	6.58	3.65	5.48	1.95	7.55	4.02	4.14	2.92	7.19	10.23	6.21	3.29	3.78	4.26	7.06	4.14	0.37	2.8	7.43
ENSMUSG00000015013	ENSMUST00000015157	Trappc2l	0.739389	0.411358	0.32803	0.607948	0.365754	0.242194	-0.0858361	-0.0456043	15	60	420	52	1224	55	5015	0	-3.138	-0.226	5	0	0	1	0	0	0	0	36.9565	5.04	5.04	5.04	6.47	2.16	5.04	2.16	2.88	2.16	5.04	7.19	5.76	6.47	3.6	3.6	7.91	6.47	0	7.19	10.79
ENSMUSG00000015016	ENSMUST00000015160	Acsf3	0.391644	0.144895	0.246749	0.633699	0.454705	0.178994	-0.0677544	0.309809	110	68	1752	56	344	57	42376	0	-8.526	-1.82	10	0	0	0	0	0	0	0	36.4261	7.03	6.35	1.54	3.43	1.2	6.86	3.95	7.89	3.77	3.77	10.63	4.29	1.72	2.92	6.86	7.03	5.66	2.57	3.26	9.26
ENSMUSG00000015023	ENSMUST00000040416	Ddx19a	0.794956	0.424877	0.37008	0.558248	0.257604	0.300644	-0.0694358	-0.167272	77	72	1437	51	1033	44	22805	2.495	-2.756	-18.197	12	0	0	2	0	0	0	0	39.6226	7.74	5.23	4.81	5.23	1.67	8.58	6.07	4.6	1.46	5.86	9.62	7.95	3.14	3.14	3.77	5.65	5.23	0.84	1.88	7.53
ENSMUSG00000015027	ENSMUST00000212319	Galns	0.538797	0.156854	0.381943	0.45876	0.115384	0.343376	-0.0385678	-0.0414696	66	58	1323	55	722	53	33016	0	-4.909	-10.226	12	0	1	0	0	0	0	0	40.3189	8.41	4.32	5.23	3.86	2.05	5.68	5.23	9.32	3.64	3.64	10	3.41	2.05	5.23	8.18	5.23	5.68	2.05	2.73	4.09
ENSMUSG00000015053	ENSMUST00000170089	Gata2	1	0.65299	0.34701	0.898914	0.784573	0.114341	-0.232669	0.131583	154	76	1443	62	1538	48	13142	0	-7.835	-20.951	6	0	0	3	0	0	0	0	46.5553	11.25	4.58	3.33	2.29	2.71	3.13	2.5	10.21	6.25	1.04	7.08	4.58	2.92	2.5	11.46	11.04	5.63	1.04	2.71	3.75
ENSMUSG00000015083	ENSMUST00000040042	C8g	0.235128	-0.200163	0.435291						382	52	609	54	159	51	1963	0	-6.325	2.383	7	0	0	0	0	0	0	11.5	32.8358	8.91	7.43	2.48	2.97	1.49	4.95	6.93	6.44	1.98	3.47	11.39	2.97	1.49	6.93	4.46	7.43	6.44	0.99	1.98	8.91
ENSMUSG00000015087	ENSMUST00000058137	Rabl6	0.627858	0.285386	0.342472	0.733233	0.587587	0.145646	-0.196826	0.302201	279	73	2178	53	773	59	25504	4.184	-1.886	-13.414	15	0	0	0	0	0	0	9.17	37.9834	6.34	4.97	2.62	7.72	0.69	8.55	4.97	6.76	1.79	2.34	7.03	8.55	2.21	3.17	9.52	10.07	4.55	0.83	1.52	5.79
ENSMUSG00000015092	ENSMUST00000015236	Edf1	0.66143	0.0987547	0.562675	0.613437	0.333544	0.279893	-0.282782	0.23479	105	79	447	57	170	57	4236	0.186	-4.426	-6.603	5	0	0	0	0	0	0	0	55.7823	10.14	6.76	3.38	5.41	0	7.43	6.76	8.11	2.03	6.76	6.76	14.19	0.68	0	3.38	4.05	6.76	1.35	0.68	5.41
ENSMUSG00000015094	ENSMUST00000071442	Npdc1									183	69	999	60	303	54	6424	0	-10.744	-28.922	9	0	0	0	0	0	0	0	36.858	10.54	6.63	1.2	3.01	3.31	7.23	5.72	7.23	3.92	1.81	13.86	3.01	1.51	1.81	10.84	9.04	5.12	0.6	1.2	2.41
ENSMUSG00000015095	ENSMUST00000015239	Fbxw5	0.409549	0.154307	0.255242	0.480122	0.439019	0.0411029	-0.214139	0.284712	160	70	1722	56	506	52	4722	0	-8.044	-26.603	9	0	0	0	0	0	0	0	38.986	6.98	6.81	3.49	8.03	2.27	4.54	4.01	5.58	3.66	4.19	10.47	2.97	1.4	4.89	5.76	8.2	4.54	1.92	2.97	7.33
ENSMUSG00000015112	ENSMUST00000015256	Slc25a13	0.462412	0.184984	0.277428	-1.64489	-1.4908	-0.154086	-0.431515	-1.67579	108	66	2031	48	928	37	175901	0	-0.833	-19.501	18	0	4	2	0	0	0	0	31.1111	10.36	4.88	2.81	4.29	1.04	5.77	4.44	7.99	1.63	4.73	9.62	6.21	1.78	7.84	5.03	5.33	5.18	0.44	2.81	7.84
ENSMUSG00000015120	ENSMUST00000173084	Ube2i	0.671909	0.330731	0.341178	0.598095	0.413916	0.184179	-0.156999	0.0831846	302	59	477	48	507	46	11463	1.037	3.742	-5.878	8	0	1	0	0	0	0	2.11	31.2102	7.59	5.06	4.43	4.43	2.53	6.96	4.43	5.7	1.27	5.7	8.23	8.86	2.53	4.43	10.13	4.43	3.8	2.53	3.16	3.8
ENSMUSG00000015126	ENSMUST00000063574	Tsr3	0.834058	0.283243	0.550815	0.907436	0.648916	0.25852	-0.292296	0.365674	83	53	972	58	137	48	2629	0	-11.276	-0.081	6	0	0	0	0	0	0	0	41.6149	9.91	8.67	2.17	7.74	3.1	9.29	3.41	9.29	0.93	1.86	9.29	4.64	1.24	3.1	6.19	7.12	2.79	1.24	1.86	6.19
ENSMUSG00000015127	ENSMUST00000039734	Unkl	0.536094	0.253022	0.283071	0.721819	0.386878	0.334941	0.0518694	0.133856	19	31	2184	58	2576	43	46047	0	-7.995	4.557	15	0	0	11	0	0	0	0	43.3884	7.7	7.15	2.2	4.95	3.99	5.5	6.05	6.6	3.3	2.34	9.63	4.26	0.69	2.2	8.53	12.93	4.4	1.24	2.61	3.71
ENSMUSG00000015133	ENSMUST00000015277	Lrrk1	0.234061	0.500709	-0.266648	0.36585	0.396804	-0.0309544	0.235693	-0.103905	249	63	6045	55	1171	50	129606	0	-5.385	-14.139	34	0	2	1	0	0	0	8.17	38.2017	6.65	4.97	3.87	4.72	2.68	6.55	4.82	5.51	2.48	4.52	12.36	5.31	2.38	3.82	5.66	8.59	4.72	1.54	2.53	6.31
ENSMUSG00000015143	ENSMUST00000021554	Actn1	0.0387818	-0.0855615	0.124343	0.282776	0.350397	-0.0676204	-0.191964	0.435958	280	72	2679	53	775	39	92825	3.22	-2.692	7.02	21	0	0	0	0	0	0	0	44.7811	8.18	6.17	4.93	6.95	1.23	9.53	5.83	4.48	3.03	6.84	9.42	5.94	2.91	3.36	3.36	4.04	5.38	1.79	2.8	3.81
ENSMUSG00000015149	ENSMUST00000072965	Sirt2	0.417507	0.139838	0.277669	0.395406	0.303066	0.0923407	-0.185328	0.163228	85	64	1170	57	588	49	21894	0	-4.917	-12.255	16	0	1	0	0	0	0	0	43.8144	6.94	4.37	2.06	5.66	2.83	8.23	5.14	7.71	1.54	4.11	10.28	6.68	2.83	4.88	6.43	6.94	6.17	0.77	2.83	3.6
ENSMUSG00000015165	ENSMUST00000174548	Hnrnpl	0.767397	0.350729	0.416668	0.695729	0.271404	0.424325	0.0076579	-0.0793254	558	57	1761	56	360	35	13726	3.475	-7.397	-41.82	14	1	1	1	0	0	0	16.11	42.906	6.83	5.97	5.8	5.29	1.88	4.95	4.44	11.6	3.07	3.07	5.97	4.95	2.56	3.58	8.36	7	3.07	0.34	4.78	6.48
ENSMUSG00000015176	ENSMUST00000165017	Nolc1	0.914385	0.449343	0.465042	0.900965	0.45083	0.450135	-0.0149069	0.00148696	167	65	2109	53	1358	44	9666	2.462	0.271	-19.357	13	0	0	0	0	0	0	2.1	44.5078	14.1	3.13	1.71	5.41	0	10.11	4.56	3.99	0.28	0.57	2.14	15.53	0.28	1.28	8.4	17.09	5.56	0.28	0.57	4.99
ENSMUSG00000015189	ENSMUST00000153963	Casd1	0.466929	0.158888	0.308042	0.274633	0.079767	0.194866	-0.113176	-0.0791207	23	47	216	60	205	36	7603	0	-14.632	1.223	4	0	0	0	0	0	0	0	38.5714	15.49	9.86	2.82	0	2.82	4.23	4.23	5.63	2.82	1.41	15.49	4.23	2.82	1.41	1.41	9.86	1.41	1.41	4.23	8.45
ENSMUSG00000015202	ENSMUST00000015346	Cnksr3	0.850545	0.327942	0.522602	0.816399	0.551236	0.265163	-0.257439	0.223293	554	69	1668	53	1225	42	93175	0	-2.601	-2.545	13	0	1	3	0	0	0	6.45	36.4621	5.05	6.31	3.96	5.23	1.62	5.95	3.6	5.95	1.98	4.14	10.63	7.21	1.98	2.16	7.93	9.01	6.85	1.26	2.7	6.49
ENSMUSG00000015214	ENSMUST00000015358	Mtmr1	0.684598	0.445118	0.23948	0.369998	0.100331	0.269667	0.0301877	-0.344787	155	73	2010	44	2469	40	54437	0.737	-0.354	-33.125	15	0	2	8	0	0	0	0	25.2994	7.47	5.23	4.78	5.23	1.94	6.58	3.59	5.53	3.14	6.43	7.62	5.53	2.09	4.19	4.93	9.27	4.33	1.94	3.44	6.73
ENSMUSG00000015217	ENSMUST00000072699	Hmgb3	0.734097	0.46905	0.265047	0.828066	0.486142	0.341924	0.0768766	0.0170918	96	68	603	44	872	41	4759	0.905	3.332	3.107	5	0	0	1	0	0	0	0	37.1859	7.5	3.5	3.5	6	1.5	16	1	6	0.5	1.5	2	20	3	5	6.5	6	2	1	3	4.5
ENSMUSG00000015222	ENSMUST00000114013	Map2	-0.976426	-1.52416	0.547731	-0.533836	-0.327257	-0.206578	-0.75431	1.1969	590	47	5487	47	181	34	117470	0	2.521	3.687	15	0	2	1	0	0	0	12.95	28.3525	7.71	4.05	1.75	6.62	0.38	11.82	3.77	5.91	1.64	3.67	6.62	8.37	1.75	2.57	8.15	10.72	7.11	0.27	1.48	5.63
ENSMUSG00000015222	ENSMUST00000114013	Map2	-0.976426	-1.52416	0.547731	-0.533836	-0.327257	-0.206578	-0.75431	1.1969	590	47	5487	47	181	34	117470	0	2.521	3.687	15	0	2	1	0	0	0	12.95	28.3525	7.71	4.05	1.75	6.62	0.38	11.82	3.77	5.91	1.64	3.67	6.62	8.37	1.75	2.57	8.15	10.72	7.11	0.27	1.48	5.63
ENSMUSG00000015222	ENSMUST00000114015	Map2	-0.976426	-1.52416	0.547731	-0.533836	-0.327257	-0.206578	-0.75431	1.1969	460	50	1404	53	3576	35	267268	0	0.348	3.687	14	1	0	8	0	0	0	0	34.5494	9.85	6	3.43	3.85	0.21	7.49	4.07	8.35	2.36	4.5	6	7.71	0.43	1.28	9.21	11.78	7.07	0.21	1.07	5.14
ENSMUSG00000015222	ENSMUST00000114015	Map2	-0.976426	-1.52416	0.547731	-0.533836	-0.327257	-0.206578	-0.75431	1.1969	460	50	1404	53	3576	35	267268	0	0.348	3.687	14	1	0	8	0	0	0	0	34.5494	9.85	6	3.43	3.85	0.21	7.49	4.07	8.35	2.36	4.5	6	7.71	0.43	1.28	9.21	11.78	7.07	0.21	1.07	5.14
ENSMUSG00000015224	ENSMUST00000055693	Cyp2j9									233	52	1509	47	295	37	23150	0	2.171	-3.994	9	0	3	1	0	0	0	0	27.9441	6.18	6.57	5.38	4.58	1.59	5.98	4.78	3.98	2.79	5.38	12.15	4.18	3.59	7.77	6.18	5.58	5.78	1.2	1.79	4.58
ENSMUSG00000015243	ENSMUST00000030010	Abca1	0.491273	0.380241	0.111033	0.526458	0.414316	0.112143	0.00110993	0.0340753	320	62	6786	50	3156	36	129109	1.062	-3.378	-15.154	50	0	1	6	0	0	0	1.7	33.8496	5.4	4.38	4.6	5.13	1.77	5.48	4.07	6.55	1.77	5.79	11.46	5.66	2.61	5.17	4.87	7.96	5	1.72	3.01	7.61
ENSMUSG00000015247	ENSMUST00000107665	Nipsnap3b	0.797735	0.640606	0.157129	0.746639	0.456881	0.289758	0.132629	-0.183726	38	78	594	47	216	47	9627	0	-0.035	-11.965	5	0	0	1	0	0	0	0	30.102	7.61	7.61	4.57	2.54	1.02	7.11	3.05	4.06	3.55	3.55	8.12	5.58	1.02	6.6	6.09	7.11	7.11	3.55	3.05	7.11
ENSMUSG00000015289	ENSMUST00000114153	Lage3	0.843355	0.328885	0.51447	0.619715	-0.298143	0.917857	0.403387	-0.627028	67	62	336	53	1594	42	2319	0	-4.059	4.701	2	0	0	4	0	0	0	0	28.1818	9.91	6.31	1.8	2.7	3.6	5.41	2.7	9.91	5.41	1.8	8.11	3.6	2.7	2.7	8.11	9.91	7.21	0	0	8.11
ENSMUSG00000015290	ENSMUST00000178691	Ubl4a	0.941116	0.741455	0.19966	0.836813	0.635295	0.201518	0.00185728	-0.106161	553	60	474	53	11	45	5754	0	-7.237	-10.806	7	0	0	0	0	0	0	6.03	35.8974	7.01	7.64	2.55	6.37	1.27	7.64	5.1	3.18	2.55	2.55	16.56	7.64	1.27	2.55	3.82	8.28	3.18	0.64	1.27	8.92
ENSMUSG00000015291	ENSMUST00000015435	Gdi1	0.385485	0.249734	0.13575	0.266731	0.231514	0.0352177	-0.100533	-0.0182207	399	60	1344	48	923	47	6865	0.836	-1.026	4.745	11	0	2	3	0	0	0	5.45	33.6323	5.37	4.47	4.47	7.16	2.24	7.38	3.8	6.94	1.12	7.16	7.83	6.49	3.13	4.25	4.7	6.04	4.7	0.22	5.59	6.94
ENSMUSG00000015305	ENSMUST00000015449	Sash1									212	74	3693	55	3278	43	163852	0	-3.795	-21.965	20	0	0	6	0	0	0	2.72	40.1139	4.55	6.26	2.6	6.42	1.71	8.94	3.33	6.99	1.87	2.76	8.54	7.64	2.36	2.11	8.7	11.79	5.37	0.73	1.87	5.45
ENSMUSG00000015312	ENSMUST00000015456	Gadd45b	0.763507	0.586078	0.177429	0.774487	0.539596	0.234891	0.0574618	-0.0464819	243	51	483	58	558	56	2132	0.556	-9.998	-9.501	4	0	0	0	0	0	0	0	43.3962	9.38	4.38	3.75	7.5	3.75	10	6.88	3.75	1.88	4.38	12.5	1.88	2.5	1.25	1.88	5.63	5.63	1.25	1.88	10
ENSMUSG00000015314	ENSMUST00000171330	Slamf6	0.645969	0.335363	0.310606	0.66564	0.394748	0.270892	-0.0397141	0.0593846	171	41	996	45	1318	41	26374	1.204	3.659	2.817	8	0	1	2	0	0	0	0	23.9394	5.74	3.32	6.65	2.72	2.11	4.23	5.44	5.14	1.21	7.25	8.46	3.93	2.72	2.11	5.74	11.78	7.85	2.72	2.72	8.16
ENSMUSG00000015316	ENSMUST00000015460	Slamf1	0.834388	0.537613	0.296775	0.806931	0.337154	0.469777	0.173002	-0.200459	100	58	1032	49	1561	40	34058	0	0.809	-8.487	7	0	2	4	0	0	0	0	32.1637	4.08	2.33	4.96	3.5	2.33	6.12	6.12	4.96	2.92	4.96	10.5	6.71	1.75	2.33	5.54	12.24	6.71	1.46	3.21	7.29
ENSMUSG00000015335	ENSMUST00000102865	Zdhhc12	0.691484	0.441671	0.249813	0.767808	0.848257	-0.0804494	-0.330262	0.406586	60	79	804	61	301	47	2705	0	-9.805	-32.719	5	0	0	1	0	0	0	0	38.7218	5.99	7.49	2.25	1.87	3.37	5.99	4.87	5.62	3.75	1.12	18.73	0.37	1.87	4.87	6.37	5.62	6.37	4.12	2.25	7.12
ENSMUSG00000015337	ENSMUST00000015481	Endog	0.966994	0.739989	0.227004	0.965611	0.761796	0.203815	-0.0231888	0.0218065	82	62	885	65	96	50	2577	0	-16.686	-4.864	3	0	0	0	0	0	0	0	52.5597	12.24	9.52	4.08	4.42	0.68	5.1	2.72	9.52	2.72	2.72	11.9	2.72	1.02	2.72	6.46	5.1	4.08	1.36	4.08	6.8
ENSMUSG00000015340	ENSMUST00000164685	Cybb	0.337022	0.486423	-0.149401	-0.0747655	0.203454	-0.27822	-0.128819	-0.282969	19	36	345	49	428	46	22345	1.982	-1.834	16.875	8	0	0	1	0	0	0	0	19.469	8.77	7.02	7.89	2.63	4.39	1.75	0.88	5.26	1.75	5.26	16.67	3.51	3.51	5.26	3.51	5.26	3.51	2.63	4.39	6.14
ENSMUSG00000015341	ENSMUST00000051094	Golga7	0.719352	0.578532	0.14082	0.629399	0.455989	0.17341	0.0325903	-0.122543	77	75	414	46	1301	41	15729	0.778	-0.686	-27.936	6	0	0	5	0	0	0	0	34.5588	5.11	7.3	2.92	2.92	2.92	10.22	8.03	6.57	0.73	6.57	9.49	5.84	1.46	3.65	3.65	5.11	6.57	0	5.84	5.11
ENSMUSG00000015342	ENSMUST00000015486	Xk	0.683164	0.20526	0.477904	0.598733	0.6608	-0.0620664	-0.53997	0.455539	234	77	1341	50	3501	36	40495	0	-0.374	-32.98	3	0	1	4	0	0	0	3.06	28.764	6.5	4.71	2.02	2.91	4.04	4.71	3.59	3.14	0.9	7.17	14.13	4.48	2.47	6.73	3.81	8.3	5.61	2.24	4.48	8.07
ENSMUSG00000015354	ENSMUST00000015498	Pcolce2									193	71	1245	50	3000	41	60496	0	-1.486	-28.487	9	0	1	5	0	0	0	2.57	36.0775	5.56	5.8	5.8	4.11	3.86	3.62	3.14	10.14	0.97	5.31	7	6.28	2.9	4.83	6.28	5.31	7.73	0.72	3.38	7.25
ENSMUSG00000015355	ENSMUST00000068584	Cd48	0.698884	0.303229	0.395655	0.734756	0.341587	0.393169	-0.00248537	0.0383581	84	48	723	43	379	36	23247	0	5.475	-1.965	4	0	1	0	0	0	0	0	24.2678	2.08	3.33	5.42	4.17	2.92	6.25	2.5	5	2.92	6.25	10.83	7.5	0.83	3.33	5.42	7.5	10	2.08	4.58	7.08
ENSMUSG00000015357	ENSMUST00000015501	Clpx	0.89924	0.496546	0.402694	0.925986	0.516505	0.409481	0.00678691	0.019959	227	67	1905	45	753	33	36398	0	1.855	-14.429	14	0	2	3	1	0	0	0	26.2243	8.2	5.84	4.1	5.05	2.21	7.89	4.89	8.2	1.58	4.73	9.62	7.41	1.1	2.84	4.57	7.26	4.89	0.16	2.21	7.26
ENSMUSG00000015363	ENSMUST00000081702	Trabd	0.681059	0.557135	0.123924	0.778684	0.599897	0.178787	0.0548631	0.0427615	164	77	1131	58	1144	54	11065	1.62	-8.57	-7.328	10	0	0	1	0	0	0	2.73	39.4667	7.71	8.24	1.86	5.05	1.6	7.71	4.52	5.85	1.33	3.19	10.64	5.59	3.99	3.46	5.85	6.12	3.72	1.06	1.6	10.9
ENSMUSG00000015377	ENSMUST00000078953	Dennd6b	0.0405008	-0.290564	0.331065	0.375892	0.278069	0.0978231	-0.233242	0.568633	53	65	1758	56	2774	53	14236	0	-6.06	-33.559	20	0	0	2	0	0	0	0	38.8699	5.64	6.32	1.54	4.62	2.74	5.47	5.81	4.79	2.74	3.08	14.19	6.15	1.71	4.27	8.03	6.67	4.27	1.88	2.56	7.52
ENSMUSG00000015396	ENSMUST00000015540	Cd83	0.945165	0.876282	0.0688825	0.956466	0.907981	0.048485	-0.0203975	0.031699	439	66	591	55	1447	44	18358	0	-6.567	-8.777	5	0	0	2	0	0	0	0	36.4103	8.67	4.59	1.53	1.53	4.08	6.63	4.59	5.1	0.51	3.06	11.22	4.59	1.53	4.59	6.63	10.71	9.69	1.02	2.55	7.14
ENSMUSG00000015401	ENSMUST00000112280	Cltrn									212	48	669	44	508	29	30031	0	1.762	8.325	7	0	0	1	0	0	0	5.67	20.8145	8.11	6.31	5.86	5.86	2.25	6.31	1.8	4.05	2.25	8.11	9.46	3.6	2.25	5.86	6.31	4.5	5.86	1.8	1.35	8.11
[truncated: 13,711 more rows]
[truncated: 5 more columns]

## Sheet: README
Supplemental Table S3. Database containing TDD, TID indexes as well as collected transcript information used for the random forest analysis.
