# Supplementary material for: Translation-dependent and -independent mRNA decay occur through mutually exclusive pathways defined by ribosome density during T cell activation
Source: HighWire-hosted journal article supplement (doi:10.1101/gr.277863.123), 2024-03-20
Supplement: Supplemental_Table_S4.xlsx [file Supplemental_Table_S4.xlsx]

## Sheet: Supplemental Table S4
Supplemental Table S4. List of qPCR primers used in this study.
Gene name	Gene ID	Primer sequence (5’ to 3’)
Snx6 F	ENSMUSG00000005656	GCTTTAGGAACTCAGGACTCTAC
Snx6 R		CAGACACCCGAGCTTCTATTT
Bin2 F	ENSMUSG00000098112	GACCTCCTTTGGGAAGACTATG
Bin2 R		CCTCTCCTTAATCTCGCTGAAC
Nod2 F	ENSMUSG00000055994	CCCTACAGCTGGATTACAACTC
Nod2 R		GCACCTCGGTCTGAGATATTG
Cnot6 F	ENSMUSG00000020362	GAGGAAGCAGCAAATGGAAAG
Cnot6 R		GTGAGTGAGTGACCACAAAGA
Rpl13 F	ENSMUSG00000000740	AGGTGCCCTACAGTGAGATA
Rpl13 R		TGCGAGCCACTTTCTTGT
Renilla F		AGGTGAAGTTCGTCGTCCAACATTATC
Renilla R		GAAACTTCTTGGCACCTTCAACAATAGC
